# Supplementary material for: sgRNA-PSM: Predict sgRNAs On-Target Activity Based on Position-Specific Mismatch
Source: PubMed Central journal article supplement — Mol Ther Nucleic Acids. 2020 Jan 31;20:323–30. doi: 10.1016/j.omtn.2020.01.029 (PMC7083770; doi:10.1016/j.omtn.2020.01.029), 2020-01-31
Supplement: mmc1.pdf [file mmc1.pdf]

OMTN, Volume 20

## **Supplemental Information**

### **sgRNA-PSM: Predict sgRNAs On-Target Activity Based on Position-Specific Mismatch**

**Bin Liu, Zihua Luo, and Juan He**

**Online Supporting Information S1.** This benchmark dataset  $\mathcal{S}$  consists of 5310 guide sequences targeting 11 human genes (CD13, CD15, CD33, CCDC101, MED12, TADA2B, TADA1, HPRT, CUL3, NF1, NF2) and 6 mouse genes (Cd45, Cd28, Cd43, Cd5, H2-K, Thy1). There are 1059 high on-target activity sgRNAs, and 4251 low on-target activity sgRNAs. See the text of the paper for further explanation.

---

(1)  $\mathcal{S}_1^+$ : 78 high on-target activity sgRNAs targeting CD13

```

>CD13_HsgRNA1
ATTGAAGAGAGACAGTACATGCCCTGGGAG
>CD13_HsgRNA2
TGACAATGAAGGCCAGCAAGTACGTGGACA
>CD13_HsgRNA3
GTGGAATGACCTGTGGCTGAACGAGGGCTT
>CD13_HsgRNA4
CAGCACCCAGGTACTCCACGTAGGAGGCGA
>CD13_HsgRNA5
GGGAACCTGGTGACCATAGAGTGGTGGAAAT
>CD13_HsgRNA6
GTGAACTACGACGAAGAGAAGTGGAGGAAG
>CD13_HsgRNA7
TGGAACTCAGTGACATTCCAGTTGGGGTCT
>CD13_HsgRNA8
TCGCACTGTCAGTGGTGTACTCCCAGGAGA
>CD13_HsgRNA9
TTGAAGAGAGACAGTACATGCCCTGGGAGG
>CD13_HsgRNA10
AGTCAGCACCCAGGTACTCCACGTAGGAGG
>CD13_HsgRNA11
GGGAAGCCCATCTGCAGGGTCCAGCGGTTC
>CD13_HsgRNA12
TCTCATACTGGCTGTCCTTACCAGGGAGC
>CD13_HsgRNA13
GGTCATCACGGTGGATAACCAGCACGGGGAC
>CD13_HsgRNA14
TCTTCAGCACATCAGGCAATGAGTGGGTCC
>CD13_HsgRNA15
TCAACATCACGCTTATCCACCCCAAGGACC
>CD13_HsgRNA16
CGGTCATCACGGTGGATAACCAGCACGGGGA
>CD13_HsgRNA17
CCATCCAACCTCCCACCACCGTGCGGGACA
>CD13_HsgRNA18
CACACCAGGATCCACCCCAACCTGCGGTCC

```

>CD13\_HsgRNA19  
TGTGCCCATCACATCCATCAGAGATGGCAG  
>CD13\_HsgRNA20  
TGCACCTCAAGGGCTCCCTGGTGAAGGACA  
>CD13\_HsgRNA21  
ACCACCTTGGACCAAAGTAAAGCGTGAAT  
>CD13\_HsgRNA22  
TGAACGAGGGCTTCGCCTCCTACGTGGAGT  
>CD13\_HsgRNA23  
GGGCCGGCGTGTGATCTCCGAGGCGGGTG  
>CD13\_HsgRNA24  
TGGCCGGCTCATCGAAGCATGGGAAGGACT  
>CD13\_HsgRNA25  
AGGACGTATTC AAGCAGGGCCTGGCGGTGA  
>CD13\_HsgRNA26  
GCACCGTCCGTTTCACCTGCAAGGAGGCCA  
>CD13\_HsgRNA27  
ACCGCGTGATGGCAGTGGATGCACTGGCCT  
>CD13\_HsgRNA28  
CCGTCTACTGCAACGCTATCGCCCAGGGCG  
>CD13\_HsgRNA29  
TCTCCTCACACTCTGGA ACTCCGTTGGAGC  
>CD13\_HsgRNA30  
TGGTGAAGGACAGCCAGTATGAGATGGACA  
>CD13\_HsgRNA31  
TGATGACCGGAAGCCCATCTGCAGGGTCC  
>CD13\_HsgRNA32  
AAGAGAGACAGTACATGCCCTGGGAGGCCG  
>CD13\_HsgRNA33  
ATGAGATGGACAGCGAGTTCGAGGGGGAGT  
>CD13\_HsgRNA34  
TACTGCAACGCTATCGCCCAGGGCGGGAG  
>CD13\_HsgRNA35  
CAACGCCGGCGCCATGGAGAACTGGGGACT  
>CD13\_HsgRNA36  
TCCAGCGTTTCATGATGTCCCGCACGGTGG  
>CD13\_HsgRNA37  
TCAAGCTCATGTTTGACCGCTCCGAGGTCT  
>CD13\_HsgRNA38  
GTGGGCTCCGCATAGTCAGCACCCAGGTAC  
>CD13\_HsgRNA39  
GGATGCTCTCCAGCTTCTGTCCGAGGACG  
>CD13\_HsgRNA40  
CCCTGCTTGAATACGTCCTCGGACAGGAAG

>CD13\_HsgRNA41  
TGGTGGAGCCCACCGAGTACCTGGTGGTGC  
>CD13\_HsgRNA42  
TCTGGGCCGGCGTGTGATCTCCGAGGCGG  
>CD13\_HsgRNA43  
GATTGGCCTGCCAGACTTCAACGCCGGCGC  
>CD13\_HsgRNA44  
CCGAGGCGGGTGTGGACAGCGGGTGGGAGG  
>CD13\_HsgRNA45  
AGATGGGCTTCCCGGTCATCACGGTGGATA  
>CD13\_HsgRNA46  
ACCCGGTAATAGCCCGTCACATTGAGGTTC  
>CD13\_HsgRNA47  
GTGAGGTACGGTCTCAGCGTCACCCGGTAG  
>CD13\_HsgRNA48  
GAGGGGTGGCAGACACTCACCGAGTGGTCT  
>CD13\_HsgRNA49  
GCAAGTACGTGGACATCTTGGGCGTGGTGT  
>CD13\_HsgRNA50  
TGCAGTAGACGGTGGACCGCAGGTTGGGGT  
>CD13\_HsgRNA51  
TGAAGTAGCTCAGGCTGCTCAGGGCGGCCT  
>CD13\_HsgRNA52  
CGTAGTCGAACTCACTGACAATGAAGCCA  
>CD13\_HsgRNA53  
GCCAGTGCATCCACTGCCATCACGCGGTAC  
>CD13\_HsgRNA54  
CTACGTGGAGAAGCAGGCATCCAATGGTGT  
>CD13\_HsgRNA55  
AGCGGTTCATGATGTCCCGCACGGTGGTGG  
>CD13\_HsgRNA56  
CTCCGTTGGAGCAGGCGGTGCTGATGGCAT  
>CD13\_HsgRNA57  
ACCATAGAGTGGTGAATGACCTGTGGCTG  
>CD13\_HsgRNA58  
AAGCTCAACTACACCCTCAGCCAGGGGCAC  
>CD13\_HsgRNA59  
GTCATCACGGTGGATACCAGCACGGGGACC  
>CD13\_HsgRNA60  
CTCTTCAGCACATCAGGCAATGAGTGGGTC  
>CD13\_HsgRNA61  
AGACTCAGCTGCAGAGAGACCACTCGGTGA  
>CD13\_HsgRNA62  
CAGCTCAGTCTTGTCAATGTCGGGGGGCTG

>CD13\_HsgRNA63  
 TCCATCCAAC TCCCCACCACCGTGCGGGAC  
 >CD13\_HsgRNA64  
 GATCTCCGAGGCGGGTGTGGACAGCGGGTG  
 >CD13\_HsgRNA65  
 AGCATCCTGAGGACTGAGGCGCCCTGGGGT  
 >CD13\_HsgRNA66  
 ACTGTCTCTCTTCAATCAGGAAGAGGGTGT  
 >CD13\_HsgRNA67  
 CAGTTCTCTTCGTCGTAGTTCACCCGGTAA  
 >CD13\_HsgRNA68  
 ATGATCTGTGCCCGATTGATGACAGGGATG  
 >CD13\_HsgRNA69  
 GTGATGACCGGAAGCCCATCTGCAGGGTC  
 >CD13\_HsgRNA70  
 GAGGTGCACCACCAGGTACTCGGTGGGCTC  
 >CD13\_HsgRNA71  
 ACCATGCACCTCCGTACCTTCATGGGGCCA  
 >CD13\_HsgRNA72  
 ACTCTGGAAC TCCGTTGGAGCAGGCGGTGC  
 >CD13\_HsgRNA73  
 TTCATGGCCGGCTCATCGAAGCATGGGAAG  
 >CD13\_HsgRNA74  
 CAGCTGGCTTACCAAGTTCAGGTGGGCTC  
 >CD13\_HsgRNA75  
 TTCATGGGGCCATAGACCTCGGAGCGGTCA  
 >CD13\_HsgRNA76  
 GTGCTGGTATCCACCGTGATGACCGGGAAG  
 >CD13\_HsgRNA77  
 ATGATGTGTACCGCGTGATGGCAGTGGATG  
 >CD13\_HsgRNA78  
 GTGTTGTTTCAGCGCCAGAGTGACAGGGACC

(2)  $S_2^+$ : 55 high on-target activity sgRNAs targeting CD15

>CD15\_HsgRNA1  
 TGTGACCGTGGACGTGTTCCGGCCGGGGCGG  
 >CD15\_HsgRNA2  
 TAGGACGCGCGGTTCGGTGAGCAGGCGGCAG  
 >CD15\_HsgRNA3  
 GTCCACGTGGATGAAGGCGCCGCGGGGCAC  
 >CD15\_HsgRNA4  
 ACCAACTGAGCCAACATGTGACCGTGGACG  
 >CD15\_HsgRNA5  
 CGCCACTGTCCAGGAAACAGGGGCTGGTGG

>CD15\_HsgRNA6  
CACCAGCCCCTGTTTCCTGGACAGTGGCGG  
>CD15\_HsgRNA7  
CGGTAGGAGAGCGTCCAGTTGAAGAGGTTA  
>CD15\_HsgRNA8  
TTCGAGTCGCCCTCGCACTCCCCGGGGCTG  
>CD15\_HsgRNA9  
CATCCAAACCCAGCGCTGGCCCCGGGGGCCT  
>CD15\_HsgRNA10  
GGCACAAAGACGTCCGAGTCCGCCCGGTAG  
>CD15\_HsgRNA11  
TCTTCAACTGGACGCTCTCTACCGGGCGG  
>CD15\_HsgRNA12  
CTCCCACCACAGCAGCACGCCACCGGTCCG  
>CD15\_HsgRNA13  
AAAGCACGGCCTGAGCCTCTCCGTAGGACG  
>CD15\_HsgRNA14  
GAGGCACTTGGGAAGTCGTCCACGTGGATG  
>CD15\_HsgRNA15  
GTCCGAACCCCGTCGCGACCGGTGGGCGT  
>CD15\_HsgRNA16  
GGCACCAAGGCTCGTCCCAGAAGGAGGTGA  
>CD15\_HsgRNA17  
TTTTCCACCACCGCGACCTCGTGAAGGGGC  
>CD15\_HsgRNA18  
TCGTCCACGTGGATGAAGGCGCCGCGGGGC  
>CD15\_HsgRNA19  
AGGCCCCCGGGCCAGCGCTGGGTTTGGATG  
>CD15\_HsgRNA20  
CAGCCCCTGTTTCCTGGACAGTGGCGGGGC  
>CD15\_HsgRNA21  
GGCCCCGCCACTGTCCAGGAAACAGGGGCT  
>CD15\_HsgRNA22  
GGGGCCTGGGGCTGGAGGTGCCAGGGCTT  
>CD15\_HsgRNA23  
TCACCGACCGCGCTCCTACGGAGAGGCTC  
>CD15\_HsgRNA24  
GCCCCGAGGCCGCCCTGACTGCCGGCTG  
>CD15\_HsgRNA25  
GCTTCGCAGCCCCGGGGAGTGCGAGGGCGA  
>CD15\_HsgRNA26  
GCCCCGCCACTGTCCAGGAAACAGGGGCTG  
>CD15\_HsgRNA27  
ACCGCGCTCCTACGGAGAGGCTCAGGCCG

>CD15\_HsgRNA28  
GAGCCTCTCCGTAGGACGCGCGGTTCGGTGA  
>CD15\_HsgRNA29  
GCCACTGGGACGAGCGCCAGGCCCGGGTCC  
>CD15\_HsgRNA30  
GCCCTGTTTCCTGGACAGTGGCGGGGCCA  
>CD15\_HsgRNA31  
ACGACTTCCCAAGTGCCTCCTCCCTGGCCT  
>CD15\_HsgRNA32  
GCCTGAGCCTCTCCGTAGGACGCGCGGTTCG  
>CD15\_HsgRNA33  
CGTCGCCAACCCCGTCGCGACCGGTGGGCG  
>CD15\_HsgRNA34  
GCCCGCCCCGGCCGAACACGTCCACGGTCA  
>CD15\_HsgRNA35  
GGGGGCCCTTCACGAGGTTCGCGGTGGTGG  
>CD15\_HsgRNA36  
TATCGCCGCTACTTCCACTGGCGCCGGAGC  
>CD15\_HsgRNA37  
AGTGGCGGGCCAGGCCTGAGGGCGGGTTCG  
>CD15\_HsgRNA38  
TGCTGCTGTGGTGGGAGCCCTTCGGGGGGC  
>CD15\_HsgRNA39  
TGGTGGCATGGGTGGTGGAGCCACTGGGACG  
>CD15\_HsgRNA40  
ACCCGGGCTGGCGCTCGTCCCAGTGGCTC  
>CD15\_HsgRNA41  
TCGGGGGGCCCTTCACGAGGTTCGCGGTGG  
>CD15\_HsgRNA42  
GACCGGTGGGCGTGCTGCTGTGGTGGGAGC  
>CD15\_HsgRNA43  
GCGGGGTTGCGGTTCGAGGAAAAGCAGGTAC  
>CD15\_HsgRNA44  
TGCGGTTCGAGGAAAAGCAGGTACGAGGCCA  
>CD15\_HsgRNA45  
CGAGGTTCGCGGTGGTGGAAAAGCACGGCCT  
>CD15\_HsgRNA46  
GGCAGTGTGCGCCTGGATGCCCCAGGGCGG  
>CD15\_HsgRNA47  
CTCAGTTGGTGGTAGTAGCGGACCCGGGCC  
>CD15\_HsgRNA48  
CAACTACGAGCGCTTTGTGCCCCGCGGCGC  
>CD15\_HsgRNA49  
CTCTTCAACTGGACGCTCCTACCGGGCG

>CD15\_HsgRNA50  
 ACGGTCACATGTTGGCTCAGTTGGTGGTAG  
 >CD15\_HsgRNA51  
 TAGCTCCGGCGCCAGTGGAAAGTAGCGGCGA  
 >CD15\_HsgRNA52  
 GGCTTCGCAGCCCCGGGAGTGCGAGGGCG  
 >CD15\_HsgRNA53  
 GAGGTGATGTGGACAGCGTAGCTCCGGGCGC  
 >CD15\_HsgRNA54  
 TACTTGCCAGGCTTCGCAGCCCCGGGAGT  
 >CD15\_HsgRNA55  
 AACTTGTAGCGGGCCACTGTGTGCAGGAGC

(3)  $S_3^+$ : 28 high on-target activity sgRNAs targeting CD33

>CD33\_HsgRNA1  
 CCTCATCCCTGGCACTCTAGAACCCGGCCA  
 >CD33\_HsgRNA2  
 GGGTATGGGATGGAAGAAAGTGCAGGGCAC  
 >CD33\_HsgRNA3  
 ACAGCCACTCACCTGCCCACAGCAGGGGCA  
 >CD33\_HsgRNA4  
 TCCTCCTGGCGTCTACGATGCTCAGGGAGC  
 >CD33\_HsgRNA5  
 TCCTCGGTGCTCATAATCACCCCACGGCCC  
 >CD33\_HsgRNA6  
 CCCGGAACCAGTAACCATGAACTGGGGAGT  
 >CD33\_HsgRNA7  
 AGCTGACAACCAGGAGAAGATCGGGGGTGT  
 >CD33\_HsgRNA8  
 GCAGGAGTCAGTGACGGTACAGGAGGGTTT  
 >CD33\_HsgRNA9  
 GGCTGCAAGTGCAGGAGTCAGTGACGGTAC  
 >CD33\_HsgRNA10  
 AAGTGCAGGAGTCAGTGACGGTACAGGAGG  
 >CD33\_HsgRNA11  
 CTGAGCATCGTAGACGCCAGGAGGAGGGAT  
 >CD33\_HsgRNA12  
 TGGTGCCGTGGTCCCTGGGGCCGTGGGGTGA  
 >CD33\_HsgRNA13  
 TCCC GGAACCAGTAACCATGAACTGGGGAG  
 >CD33\_HsgRNA14  
 GGATGGAAGAAAGTGCAGGGCACGAGGACG  
 >CD33\_HsgRNA15  
 TGCAGGAGTCAGTGACGGTACAGGAGGGTT



>CD33\_HsgRNA16  
 GAGTGGCCGGGTTCTAGAGTGCCAGGGATG  
 >CD33\_HsgRNA17  
 ACCTGTCACATGCACAGAGAGCTGGGGAGA  
 >CD33\_HsgRNA18  
 GGGAGTTCTTGTTCGTAGTAGGGTATGGGAT  
 >CD33\_HsgRNA19  
 CCATTATATCCAGGGACTCTCCAGTGGCCA  
 >CD33\_HsgRNA20  
 AGGGTATGGGATGGAAGAAAGTGCAGGGCA  
 >CD33\_HsgRNA21  
 CTCCTCCTGGCGTCTACGATGCTCAGGGAG  
 >CD33\_HsgRNA22  
 CAGCTGACAACCAGGAGAAGATCGGGGGTG  
 >CD33\_HsgRNA23  
 TCCCTGAGCATCGTAGACGCCAGGAGGAGG  
 >CD33\_HsgRNA24  
 GCCGTGGGGTGATTATGAGCACCGAGGAGT  
 >CD33\_HsgRNA25  
 CACCTGTCACATGCACAGAGAGCTGGGGAG  
 >CD33\_HsgRNA26  
 TTCTTGTTCGTAGTAGGGTATGGGATGGAAG  
 >CD33\_HsgRNA27  
 TGTTTGTGGCCACTGGAGAGTCCCTGGATA  
 >CD33\_HsgRNA28  
 CAGTTGTTCCCTACTGGGATCCCCAAGGAGG

(4)  $S_4^+$ : 30 high on-target activity sgRNAs targeting CCDC101

>CCDC101\_HsgRNA1  
 ACACAACCGCCAAGGCCGATGCAGAGGCTG  
 >CCDC101\_HsgRNA2  
 CTCTACAATGACTCGGAGCCACCCCGGAAG  
 >CCDC101\_HsgRNA3  
 ACTCAGCCTCTGCATCGGCCTTGGCGGTTG  
 >CCDC101\_HsgRNA4  
 AAACAGGACCGAGTAGTCATCCTGGGGCTG  
 >CCDC101\_HsgRNA5  
 CTGGAGGCTGCTTTACCCGCTGTGGGGGCG  
 >CCDC101\_HsgRNA6  
 ATCAAGTCTCTGTTGGAAGAGAGGCGGATT  
 >CCDC101\_HsgRNA7  
 TGGCATGGCTGTAAGTACCACCTCGGCCA  
 >CCDC101\_HsgRNA8  
 CCCTCAGCATCCTTCGAAAGCTCTGGACA

>CCDC101\_HsgRNA9  
CAAACAGGACCGAGTAGTCATCCTGGGGCT  
>CCDC101\_HsgRNA10  
GTGTCATCCCGCTGCCCCAGTGGAAGGCCA  
>CCDC101\_HsgRNA11  
GGGTCATGGCCGACTGCTGCAGCAGGGTCA  
>CCDC101\_HsgRNA12  
TGTTCCAGAAGGAGCAGCTCGTGCTGGCCC  
>CCDC101\_HsgRNA13  
GTCACCAGGCTTCCCGATCCACAGGGGCAG  
>CCDC101\_HsgRNA14  
CACCCCGGAAGACCATGCGCAGAGGGGTGC  
>CCDC101\_HsgRNA15  
GGCGCGGTAGAAGCAGGTAGTCTGGGGATA  
>CCDC101\_HsgRNA16  
ATGGCTATTCCCCTCCCCTCAATGTGGCTC  
>CCDC101\_HsgRNA17  
ATCTCTGAGCCACATTGAGGGGAGGGGAAT  
>CCDC101\_HsgRNA18  
CCCCTGTGGGGGCGCATGGATCAGGGCGC  
>CCDC101\_HsgRNA19  
TTCGAAAGCTCTGGACAAGATCGCGAAA  
>CCDC101\_HsgRNA20  
CCTGGAGGCTGCTTTACCCGCTGTGGGGGC  
>CCDC101\_HsgRNA21  
CATGGATCAGGGCGCGGTAGAAGCAGGTAG  
>CCDC101\_HsgRNA22  
AGAAGCAGGTAGTCTGGGGATACAGGGCCA  
>CCDC101\_HsgRNA23  
ACGAGCAGTGGATCCTGGCCGAGGTGGTCA  
>CCDC101\_HsgRNA24  
AGCGGGATGACACGGCGCCGGCTCAGGGTG  
>CCDC101\_HsgRNA25  
TGGAGGCTGCTTTACCCGCTGTGGGGGCGC  
>CCDC101\_HsgRNA26  
TCCATCAGCTGATCAAACAAACCCAGGTAA  
>CCDC101\_HsgRNA27  
CGTCTCCGGGTTGGCCTTCCACTGGGGCAG  
>CCDC101\_HsgRNA28  
TATCTCTGAGCCACATTGAGGGGAGGGGAA  
>CCDC101\_HsgRNA29  
CAGGTCTGGCCACGTAGTCTCCTGAGGCAG  
>CCDC101\_HsgRNA30  
GCGATCTTGTCCAGAGCTTTCCGAAGGATG

(5)  $S_5^+$ : 370 high on-target activity sgRNAs targeting MED12

>MED12\_HsgRNA1  
TGCTAAACTGCCACCTCAGTCCAGGGACA  
>MED12\_HsgRNA2  
TGCTAAACTGCCACCTCAGTCCAGGGACA  
>MED12\_HsgRNA3  
CGATAAATGCCAGGAAGCTACTGCAGGTAT  
>MED12\_HsgRNA4  
CGATAAATGCCAGGAAGCTACTGCAGGTAT  
>MED12\_HsgRNA5  
TCAAAACACTCAAGCACCCAGGTCAGGAAC  
>MED12\_HsgRNA6  
TCAAAACACTCAAGCACCCAGGTCAGGAAC  
>MED12\_HsgRNA7  
GAGGAACAGAAGAAGCTTCCAGAGGAGGAGG  
>MED12\_HsgRNA8  
CTTCAACCCCTCAAAAAGATCCCAGGGCGA  
>MED12\_HsgRNA9  
AAGGAAGACTGGCGCATGGTCCACTGGTCC  
>MED12\_HsgRNA10  
AAGGAAGACTGGCGCATGGTCCACTGGTCC  
>MED12\_HsgRNA11  
AAGCAAGGATACAGCGCTCTGCAGAGGAGC  
>MED12\_HsgRNA12  
CGCAAAGGGACAGCAGAACTGGTGGGTTT  
>MED12\_HsgRNA13  
CGCAAAGGGACAGCAGAACTGGTGGGTTT  
>MED12\_HsgRNA14  
TGAAAAGGTGAAGGAGGATGCGGCAGGTAA  
>MED12\_HsgRNA15  
TGAAAAGGTGAAGGAGGATGCGGCAGGTAA  
>MED12\_HsgRNA16  
GCCAAATACACAGTGCCTGTGATGCGGGCT  
>MED12\_HsgRNA17  
GCCAAATACACAGTGCCTGTGATGCGGGCT  
>MED12\_HsgRNA18  
GCAAAACACGGCTCCATCCACGATGCGGTTC  
>MED12\_HsgRNA19  
GCAAAACACTGCCGAGCGATGAGGATGGCAA  
>MED12\_HsgRNA20  
GCAAAACACTGCCGAGCGATGAGGATGGCAA  
>MED12\_HsgRNA21  
GTGTACAGAAGTAGGCAAGCCGGCGGGACA

>MED12\_HsgRNA22  
GTGTACAGAAGTAGGCAAGCCGGCGGGACA  
>MED12\_HsgRNA23  
CTGGACAGACATGAGTTCCTGACCTGGGTG  
>MED12\_HsgRNA24  
CTGGACAGACATGAGTTCCTGACCTGGGTG  
>MED12\_HsgRNA25  
GTGTACAGATCATAGAGATAAGCAAGGATA  
>MED12\_HsgRNA26  
GTGTACAGATCATAGAGATAAGCAAGGATA  
>MED12\_HsgRNA27  
GGATACAGCTGAGGCCAAAAACCAGGGGCC  
>MED12\_HsgRNA28  
GGATACAGCTGAGGCCAAAAACCAGGGGCC  
>MED12\_HsgRNA29  
AGGCACAGGTCATCTTAATGAGCCAGGCAG  
>MED12\_HsgRNA30  
AGGCACAGGTCATCTTAATGAGCCAGGCAG  
>MED12\_HsgRNA31  
TGTTACCCTCTGGCATGGGCAGGTTGGACG  
>MED12\_HsgRNA32  
TGTTACCCTCTGGCATGGGCAGGTTGGACG  
>MED12\_HsgRNA33  
TGCCACCTCTACATCATGGGGCAAGGGCCC  
>MED12\_HsgRNA34  
TGCCACCTCTACATCATGGGGCAAGGGCCC  
>MED12\_HsgRNA35  
ACTGACGGCCTTGAATGTAAAAACAAGGTTT  
>MED12\_HsgRNA36  
ACTGACGGCCTTGAATGTAAAAACAAGGTTT  
>MED12\_HsgRNA37  
TGGCACTCACCTGCAGGTAGTGGCTGGTTC  
>MED12\_HsgRNA38  
CTGCACTCAGTGACTTGCAATAGCCGGTCA  
>MED12\_HsgRNA39  
TAAGACTCTTGCCTAGCCCCGTGTAGGTGA  
>MED12\_HsgRNA40  
TAAGACTCTTGCCTAGCCCCGTGTAGGTGA  
>MED12\_HsgRNA41  
TCCCCTGACCCTTATCAGGTCTCCCGGAAT  
>MED12\_HsgRNA42  
TCCCCTGACCCTTATCAGGTCTCCCGGAAT  
>MED12\_HsgRNA43  
GTATACTTGCACTCTCATCTCCCGAGGGGA

>MED12\_HsgRNA44  
GTATACTTGCACTCTCATCTCCCGAGGGGA  
>MED12\_HsgRNA45  
GTGCAGAATGGCTAGGAGTGCTTAAGGCCT  
>MED12\_HsgRNA46  
GTGCAGAATGGCTAGGAGTGCTTAAGGCCT  
>MED12\_HsgRNA47  
GAAGAGACATGTTGACCCTTTCATGGGTGA  
>MED12\_HsgRNA48  
GAAGAGACATGTTGACCCTTTCATGGGTGA  
>MED12\_HsgRNA49  
ACGGAGACTGGCCCTGCAGCTGGATGGTGT  
>MED12\_HsgRNA50  
ACGGAGACTGGCCCTGCAGCTGGATGGTGT  
>MED12\_HsgRNA51  
GACCAGATGGCACAGGTCTTTGAGGGGTAA  
>MED12\_HsgRNA52  
GACCAGATGGCACAGGTCTTTGAGGGGTAA  
>MED12\_HsgRNA53  
CACCAGCATTAAAGGAGTGAAGGGATGGCAG  
>MED12\_HsgRNA54  
CACCAGCATTAAAGGAGTGAAGGGATGGCAG  
>MED12\_HsgRNA55  
AATGAGCCAGGCAGCCCGCATCACAGGCAC  
>MED12\_HsgRNA56  
AATGAGCCAGGCAGCCCGCATCACAGGCAC  
>MED12\_HsgRNA57  
CAATAGCCGGTCAGCTCTGCACACAGGATT  
>MED12\_HsgRNA58  
CAATAGCCGGTCAGCTCTGCACACAGGATT  
>MED12\_HsgRNA59  
ATGGAGCCGTGTTTGCTGTTCTCAAGGCTG  
>MED12\_HsgRNA60  
ATGGAGCCGTGTTTGCTGTTCTCAAGGCTG  
>MED12\_HsgRNA61  
ACACAGCCTTGAGAACAGCAAACACGGCTC  
>MED12\_HsgRNA62  
ACACAGCCTTGAGAACAGCAAACACGGCTC  
>MED12\_HsgRNA63  
TGTTAGGAGTTACTCACCCATGAAAGGGTC  
>MED12\_HsgRNA64  
TGTTAGGAGTTACTCACCCATGAAAGGGTC  
>MED12\_HsgRNA65  
AATGAGGATGGGGAAAACCCCCAGCGGCAG

>MED12\_HsgRNA66  
AATGAGGATGGGGAAAACCCCCAGCGGCAG  
>MED12\_HsgRNA67  
ACCAAGGCACTAGGACAGCACAGGAGGATG  
>MED12\_HsgRNA68  
ACCAAGGCACTAGGACAGCACAGGAGGATG  
>MED12\_HsgRNA69  
CTGAAGGCAGCAGCAGCAGCAAGCTGGAAG  
>MED12\_HsgRNA70  
ACTGAGGTGGGCAGTTTAGCAATGAGGGGG  
>MED12\_HsgRNA71  
CCAAAGTATGAAGTACCCGTCCAATGGTGA  
>MED12\_HsgRNA72  
CCAAAGTATGAAGTACCCGTCCAATGGTGA  
>MED12\_HsgRNA73  
GTTTCAGTCTGCATACCTGTCCCGCCGGCTT  
>MED12\_HsgRNA74  
GTTTCAGTCTGCATACCTGTCCCGCCGGCTT  
>MED12\_HsgRNA75  
TGAGAGTGCAAGTATACATGTTGTGGGAGA  
>MED12\_HsgRNA76  
GCGCATAAAGCGCATTCTCCAGGTAGGCCA  
>MED12\_HsgRNA77  
GCGCATAAAGCGCATTCTCCAGGTAGGCCA  
>MED12\_HsgRNA78  
CCAAATACACAGTGCCTGTGATGCGGGCTG  
>MED12\_HsgRNA79  
CCAAATACACAGTGCCTGTGATGCGGGCTG  
>MED12\_HsgRNA80  
CTCCATCCACGATGCGGTTCTGGGAGGCAG  
>MED12\_HsgRNA81  
CGCAATCCTGTGTGCAGAGCTGACCGGCTA  
>MED12\_HsgRNA82  
CGCAATCCTGTGTGCAGAGCTGACCGGCTA  
>MED12\_HsgRNA83  
CCCCATGATGTAGAGGTGGCAATCCGGCAG  
>MED12\_HsgRNA84  
CCCCATGATGTAGAGGTGGCAATCCGGCAG  
>MED12\_HsgRNA85  
CAGGATTGCGATGTCATTACCCCTAGGGAA  
>MED12\_HsgRNA86  
CAGGATTGCGATGTCATTACCCCTAGGGAA  
>MED12\_HsgRNA87  
TGCCATTGTTAGAGGAGCAGCACAAGGCCT

>MED12\_HsgRNA88  
TGCCATTGTTAGAGGAGCAGCACAAAGGCCT  
>MED12\_HsgRNA89  
CCACCAAACAGAAGATCTCGCCCTGGGATC  
>MED12\_HsgRNA90  
ACCCCAAACAGTACGACCAACCGCTGGTTG  
>MED12\_HsgRNA91  
ACCCCAAACAGTACGACCAACCGCTGGTTG  
>MED12\_HsgRNA92  
TTAGCAAAGATATCTTCAGCAGTGGGGAAG  
>MED12\_HsgRNA93  
GCTTCAACCCCTCAAAAAGATCCCAGGGCG  
>MED12\_HsgRNA94  
GAGGCAAGTGGTATGACATGCCAAGGGCAA  
>MED12\_HsgRNA95  
GAGGCAAGTGGTATGACATGCCAAGGGCAA  
>MED12\_HsgRNA96  
TAGGCAAGTGGTCAAGTGGTGAGCCGGTCT  
>MED12\_HsgRNA97  
TAGGCAAGTGGTCAAGTGGTGAGCCGGTCT  
>MED12\_HsgRNA98  
GCAGCACAGCGAATCAGATCTTCCAGGAGC  
>MED12\_HsgRNA99  
GCAGCACAGCGAATCAGATCTTCCAGGAGC  
>MED12\_HsgRNA100  
TTAACACATGTCCCTGGACTGAGGTGGGCA  
>MED12\_HsgRNA101  
AGTTCACCAGCATTAAAGGAGTGAAGGGATG  
>MED12\_HsgRNA102  
AGTTCACCAGCATTAAAGGAGTGAAGGGATG  
>MED12\_HsgRNA103  
TTGCCACCTCTACATCATGGGGCAAGGGCC  
>MED12\_HsgRNA104  
TTGCCACCTCTACATCATGGGGCAAGGGCC  
>MED12\_HsgRNA105  
CACCCAGAACCAGCCACTACCTGCAGGTGA  
>MED12\_HsgRNA106  
TGGTCAGACATACCTGCTGAGTGAAGGCAC  
>MED12\_HsgRNA107  
TGGTCAGACATACCTGCTGAGTGAAGGCAC  
>MED12\_HsgRNA108  
TGGACAGACATGAGTTCCTGACCTGGGTGC  
>MED12\_HsgRNA109  
TGGACAGACATGAGTTCCTGACCTGGGTGC

>MED12\_HsgRNA110  
GATACAGCTGAGGCCAAAAACCAGGGGCCG  
>MED12\_HsgRNA111  
GATACAGCTGAGGCCAAAAACCAGGGGCCG  
>MED12\_HsgRNA112  
GGGCCAGTCTCCGTGTACAGAAGTAGGCAA  
>MED12\_HsgRNA113  
CAGTCAGTGAGTAGTGCCAAACCAAGGCAC  
>MED12\_HsgRNA114  
CAGTCAGTGAGTAGTGCCAAACCAAGGCAC  
>MED12\_HsgRNA115  
TCAGCAGTGGGAAGGCTTCAGGCCGTTG  
>MED12\_HsgRNA116  
TCAGCAGTGGGAAGGCTTCAGGCCGTTG  
>MED12\_HsgRNA117  
GCCTCATCCTCAACCAGGACCAGATGGCAC  
>MED12\_HsgRNA118  
GCCTCATCCTCAACCAGGACCAGATGGCAC  
>MED12\_HsgRNA119  
AGAACATCGCCAAGGCCACAATCGAGGTTT  
>MED12\_HsgRNA120  
AGAACATCGCCAAGGCCACAATCGAGGTTT  
>MED12\_HsgRNA121  
CTAGCATCTCGCAAGGTAGCATGGAGGAAA  
>MED12\_HsgRNA122  
CTAGCATCTCGCAAGGTAGCATGGAGGAAA  
>MED12\_HsgRNA123  
GAAGCATGGGATGAACCGGTCCGATGGCTC  
>MED12\_HsgRNA124  
TCCACCAAACAGAAGATCTCGCCCTGGGAT  
>MED12\_HsgRNA125  
TGTTCAAACCAGCCCCAAGAGAGTGGTGC  
>MED12\_HsgRNA126  
TGTTCAAACCAGCCCCAAGAGAGTGGTGC  
>MED12\_HsgRNA127  
ATGACCAACACCAGGTCACGGCTCAGGTGT  
>MED12\_HsgRNA128  
ATGACCAACACCAGGTCACGGCTCAGGTGT  
>MED12\_HsgRNA129  
CAAACCAAGGCACTAGGACAGCACAGGAGG  
>MED12\_HsgRNA130  
CAAACCAAGGCACTAGGACAGCACAGGAGG  
>MED12\_HsgRNA131  
TGACCCAGAGCACAAGGAGGCTGAAGGCAG



>MED12\_HsgRNA132  
TGACCCAGAGCACAAGGAGGCTGAAGGCAG  
>MED12\_HsgRNA133  
GTAGCCAGCGAGTCATGAAAAGATAGGTCA  
>MED12\_HsgRNA134  
GTAGCCAGCGAGTCATGAAAAGATAGGTCA  
>MED12\_HsgRNA135  
GCAGCCATGAGTGCAACCAGCGGTTGGTTCG  
>MED12\_HsgRNA136  
GCAGCCATGAGTGCAACCAGCGGTTGGTTCG  
>MED12\_HsgRNA137  
TAGGCCACACCTGAGCCGTGACCTGGTGT  
>MED12\_HsgRNA138  
TAGGCCACACCTGAGCCGTGACCTGGTGT  
>MED12\_HsgRNA139  
TTCTCCCCTACTATGCCCTGTGAGGGGAAG  
>MED12\_HsgRNA140  
TGGGCCCCGCTAGTACCTACCTGTAGGATA  
>MED12\_HsgRNA141  
TGGGCCCCGCTAGTACCTACCTGTAGGATA  
>MED12\_HsgRNA142  
AATGCCCTTATGCACGTCTGTGTGGGGCAC  
>MED12\_HsgRNA143  
AATGCCCTTATGCACGTCTGTGTGGGGCAC  
>MED12\_HsgRNA144  
TGCTCCTCTCCTCGAGCCACTCGCCGGTCC  
>MED12\_HsgRNA145  
ACTCCCTCTTGGAGAACATCGCCAAGGCCA  
>MED12\_HsgRNA146  
ACTCCCTCTTGGAGAACATCGCCAAGGCCA  
>MED12\_HsgRNA147  
CACACCTGAGCCGTGACCTGGTGTGGTCA  
>MED12\_HsgRNA148  
CACACCTGAGCCGTGACCTGGTGTGGTCA  
>MED12\_HsgRNA149  
TCCTCCTGCAGTTTCTGGATACACAGGCTC  
>MED12\_HsgRNA150  
TCCTCCTGCAGTTTCTGGATACACAGGCTC  
>MED12\_HsgRNA151  
GGAGCCTGTGTATCCAGAACTGCAGGAGG  
>MED12\_HsgRNA152  
GGAGCCTGTGTATCCAGAACTGCAGGAGG  
>MED12\_HsgRNA153  
GACTCCTTACCTCCCTCTACAGCCAGGTGC

>MED12\_HsgRNA154  
CTTGCCTTTGGAGCCCCTGGTCCCCGGCCT  
>MED12\_HsgRNA155  
GAGTCGAGGGTGTGCTGCTAGTTGGGGGCT  
>MED12\_HsgRNA156  
CTGCCGATGACCCAGAGCACAAGGAGGCTG  
>MED12\_HsgRNA157  
CTGCCGATGACCCAGAGCACAAGGAGGCTG  
>MED12\_HsgRNA158  
GATGCGGCAGGTAAGCCGGGCCCCCTGGCTC  
>MED12\_HsgRNA159  
TGAGCGTGCTCATCAATGGGACATTGGCTG  
>MED12\_HsgRNA160  
TGGTCGTGTCTTCACAGTACTCTGGGGAAT  
>MED12\_HsgRNA161  
TGGTCGTGTCTTCACAGTACTCTGGGGAAT  
>MED12\_HsgRNA162  
TCTTCTCAAACACTCAAGCACCCAGGTCA  
>MED12\_HsgRNA163  
GCTTCTCAAATCCTCGGATCTGGTGGGCAG  
>MED12\_HsgRNA164  
GCAGCTCACACCTTCACCTACACGGGGCTA  
>MED12\_HsgRNA165  
TGGCCTCAGCTGTATCCTACAGGTAGGTAC  
>MED12\_HsgRNA166  
TGGCCTCAGCTGTATCCTACAGGTAGGTAC  
>MED12\_HsgRNA167  
GCAGCTCCAAGGAAGACTGGCGCATGGTCC  
>MED12\_HsgRNA168  
GCAGCTCCAAGGAAGACTGGCGCATGGTCC  
>MED12\_HsgRNA169  
GCTCCTCCTGGAGATCATCATCAGCGGCAC  
>MED12\_HsgRNA170  
GCTCCTCCTGGAGATCATCATCAGCGGCAC  
>MED12\_HsgRNA171  
TACTCTTACCTGAAACATGAACATGGCCA  
>MED12\_HsgRNA172  
TACTCTTACCTGAAACATGAACATGGCCA  
>MED12\_HsgRNA173  
CCCTCTGGCATGGGCAGGTTGGACGGGGCA  
>MED12\_HsgRNA174  
CCCTCTGGCATGGGCAGGTTGGACGGGGCA  
>MED12\_HsgRNA175  
GTGGCTGGTCGTAAAGAACCCCAAGGGTCC

>MED12\_HsgRNA176  
TTCGCTGGTCTTTCGATAAAATGCCAGGAAG  
>MED12\_HsgRNA177  
TTCGCTGGTCTTTCGATAAAATGCCAGGAAG  
>MED12\_HsgRNA178  
CTGGCTGTCTCCACAGAGATGTTGCGGCCA  
>MED12\_HsgRNA179  
CCGCCTGTCTCTTCTCCAGGAGCTTGGCTA  
>MED12\_HsgRNA180  
CCGCCTGTCTCTTCTCCAGGAGCTTGGCTA  
>MED12\_HsgRNA181  
CAGGCTGTGTGGCGTCGTGAAGCATGGGAT  
>MED12\_HsgRNA182  
CTGACTGTTGGAAAACCTCGATTGTGGCCT  
>MED12\_HsgRNA183  
CTGACTGTTGGAAAACCTCGATTGTGGCCT  
>MED12\_HsgRNA184  
TATACTTGCACTCTCATCTCCCGAGGGGAC  
>MED12\_HsgRNA185  
TATACTTGCACTCTCATCTCCCGAGGGGAC  
>MED12\_HsgRNA186  
CGTACTTGGCATAGACATCCAGACTGGCTG  
>MED12\_HsgRNA187  
CGTACTTGGCATAGACATCCAGACTGGCTG  
>MED12\_HsgRNA188  
CGTTCTTTGCGTGAAGAGGAACCCAGGTGC  
>MED12\_HsgRNA189  
CGTTCTTTGCGTGAAGAGGAACCCAGGTGC  
>MED12\_HsgRNA190  
TCATGAAAAGATAGGTCACTGACCTGGAGG  
>MED12\_HsgRNA191  
TCATGAAAAGATAGGTCACTGACCTGGAGG  
>MED12\_HsgRNA192  
TGAAGAACACCATCTACTGCAACGTGGAGC  
>MED12\_HsgRNA193  
TGAAGAACACCATCTACTGCAACGTGGAGC  
>MED12\_HsgRNA194  
AGAAGAACTTCCAGAGGAGGAGGGAGGAGG  
>MED12\_HsgRNA195  
GCAGGAAGCCCCAAGTGAACCAGAAGGATA  
>MED12\_HsgRNA196  
AGATGAGAAGGGTTCATCGCCTCTGGCTC  
>MED12\_HsgRNA197  
GCAGGAGGAGCGGATTCTACTGTAGGCTT

>MED12\_HsgRNA198  
GCAGGAGGAGCGGATTCCCTACTGTAGGCTT  
>MED12\_HsgRNA199  
GAAGGAGGATGCGGCAGGTAAGCCGGGCCC  
>MED12\_HsgRNA200  
GAAGGAGGATGCGGCAGGTAAGCCGGGCCC  
>MED12\_HsgRNA201  
AGTCGAGGGTGTGCTGCTAGTTGGGGGCTG  
>MED12\_HsgRNA202  
AGTCGAGGGTGTGCTGCTAGTTGGGGGCTG  
>MED12\_HsgRNA203  
GCTTGATCATGAGCTGCAGCTCCAAGGAAG  
>MED12\_HsgRNA204  
GCTTGATCATGAGCTGCAGCTCCAAGGAAG  
>MED12\_HsgRNA205  
TGATGATGATCTCCAGGAGGAGCATGGCCC  
>MED12\_HsgRNA206  
TGATGATGATCTCCAGGAGGAGCATGGCCC  
>MED12\_HsgRNA207  
AGGCGATGGAACCCTTCTCATCTGCGGCTT  
>MED12\_HsgRNA208  
AGGCGATGGAACCCTTCTCATCTGCGGCTT  
>MED12\_HsgRNA209  
TTTGGATTGGGACCTAGCAAGGATGGGCAT  
>MED12\_HsgRNA210  
TTTGGATTGGGACCTAGCAAGGATGGGCAT  
>MED12\_HsgRNA211  
AGGAGCAAACACTGCCGAGCGATGAGGATG  
>MED12\_HsgRNA212  
AGGAGCAAACACTGCCGAGCGATGAGGATG  
>MED12\_HsgRNA213  
TATTGCAAGTCACTGAGTGCAGAATGGCTA  
>MED12\_HsgRNA214  
TATTGCAAGTCACTGAGTGCAGAATGGCTA  
>MED12\_HsgRNA215  
CGGGGCAATAGGCAAGTGGTCAAGTGGTGA  
>MED12\_HsgRNA216  
CGGGGCAATAGGCAAGTGGTCAAGTGGTGA  
>MED12\_HsgRNA217  
TTAAGCAATTCATCCTCTCCAGGGCGGATC  
>MED12\_HsgRNA218  
TTAAGCAATTCATCCTCTCCAGGGCGGATC  
>MED12\_HsgRNA219  
GAAGGCACTGTTACCCTCTGGCATGGGCAG

>MED12\_HsgRNA220  
GAAGGCACTGTTACCCTCTGGCATGGGCAG  
>MED12\_HsgRNA221  
TCATGCAGCCATGAGTGCAACCAGCGGTTG  
>MED12\_HsgRNA222  
TCATGCAGCCATGAGTGCAACCAGCGGTTG  
>MED12\_HsgRNA223  
TGCCGCAGGACAGCCACGATGCACAGGCAC  
>MED12\_HsgRNA224  
TGCCGCAGGACAGCCACGATGCACAGGCAC  
>MED12\_HsgRNA225  
TTCTGCATTGGTAAGCGCACAGGACGGTAT  
>MED12\_HsgRNA226  
TTCTGCATTGGTAAGCGCACAGGACGGTAT  
>MED12\_HsgRNA227  
CAATGCCCTTATGCACGTCTGTGTGGGGCA  
>MED12\_HsgRNA228  
CAATGCCCTTATGCACGTCTGTGTGGGGCA  
>MED12\_HsgRNA229  
TGCAGCGCAGCACCCAGCAGACCACGGAGT  
>MED12\_HsgRNA230  
TAGAGCGCTCTGGTGTATGGCTGGTGGCCC  
>MED12\_HsgRNA231  
TAGAGCGCTCTGGTGTATGGCTGGTGGCCC  
>MED12\_HsgRNA232  
AGCTGCGGTGTCTTGAAAAGGTGAAGGAGG  
>MED12\_HsgRNA233  
AGCTGCGGTGTCTTGAAAAGGTGAAGGAGG  
>MED12\_HsgRNA234  
ACCAGCGGTTGGTCGTA CTGTTGGGGTGG  
>MED12\_HsgRNA235  
GACTGCTCACACCATCCAGCTGCAGGGCCA  
>MED12\_HsgRNA236  
ATGAGCTGCAGCTCCAAGGAAGACTGGCGC  
>MED12\_HsgRNA237  
ATGAGCTGCAGCTCCAAGGAAGACTGGCGC  
>MED12\_HsgRNA238  
GGCTGCTGGGGAAGAATTGGAGAAGGGTCA  
>MED12\_HsgRNA239  
GGCTGCTGGGGAAGAATTGGAGAAGGGTCA  
>MED12\_HsgRNA240  
CGTGGCTGGTCGTAAAGAACCCCAAGGGTC  
>MED12\_HsgRNA241  
CGTGGCTGGTCGTAAAGAACCCCAAGGGTC

>MED12\_HsgRNA242  
CTGTGCTGTCCTAGTGCCTTGGTTTGGCAC  
>MED12\_HsgRNA243  
CCTTGCTTCTTCATGCAGGCTGTGTGGCGT  
>MED12\_HsgRNA244  
CCTTGCTTCTTCATGCAGGCTGTGTGGCGT  
>MED12\_HsgRNA245  
ATGCGCTTTATGCGCTGCCGCTGGGGGTTT  
>MED12\_HsgRNA246  
GGGAGGAAGGTGAAACTGACCTGTTGGCAG  
>MED12\_HsgRNA247  
GGGAGGAAGGTGAAACTGACCTGTTGGCAG  
>MED12\_HsgRNA248  
TGAAGGAGGATGCGGCAGGTAAGCCGGGCC  
>MED12\_HsgRNA249  
TGAAGGAGGATGCGGCAGGTAAGCCGGGCC  
>MED12\_HsgRNA250  
CGGGGAGGCGCTCACCTCTGTCTTGGTAG  
>MED12\_HsgRNA251  
GTTAGGAGTTACTCACCCATGAAAGGGTCA  
>MED12\_HsgRNA252  
GTTAGGAGTTACTCACCCATGAAAGGGTCA  
>MED12\_HsgRNA253  
GGCAGGATCATCAAAGGGAGAGGGAGGCCG  
>MED12\_HsgRNA254  
TCCAGGCACTACTCACATTGTTAGGGTCT  
>MED12\_HsgRNA255  
ATGAGGCAGGCATGATAGTGCCGCAGGACA  
>MED12\_HsgRNA256  
ATGAGGCAGGCATGATAGTGCCGCAGGACA  
>MED12\_HsgRNA257  
CATGGGCAGGTTGGACGGGGCAATAGGCAA  
>MED12\_HsgRNA258  
CATGGGCAGGTTGGACGGGGCAATAGGCAA  
>MED12\_HsgRNA259  
CGCCGGCTTGCCTACTTCTGTACACGGAGA  
>MED12\_HsgRNA260  
CGCCGGCTTGCCTACTTCTGTACACGGAGA  
>MED12\_HsgRNA261  
TTCTGGGAGGCAGCCAGCAGGTGGCGGTCTG  
>MED12\_HsgRNA262  
GTGTGGGCCTCTATCACAGAACTTGGACC  
>MED12\_HsgRNA263  
TTTGGGTCCTGAGGGTAAACATCGGGAGG

>MED12\_HsgRNA264  
CTGAGGTGGGCAGTTTAGCAATGAGGGGGG  
>MED12\_HsgRNA265  
ACCTGGTGTGGTCATAATGTGAAAGGTGC  
>MED12\_HsgRNA266  
ACCTGGTGTGGTCATAATGTGAAAGGTGC  
>MED12\_HsgRNA267  
ATGCGGTTCTGGGAGGCAGCCAGCAGGTGG  
>MED12\_HsgRNA268  
ATGCGGTTCTGGGAGGCAGCCAGCAGGTGG  
>MED12\_HsgRNA269  
TTCAGTAAGAAGGAAGAGGTGTTTGGGTAC  
>MED12\_HsgRNA270  
AGTGGTAGGGGTCCGTACTCAGCATGGGAG  
>MED12\_HsgRNA271  
AGTGGTAGGGGTCCGTACTCAGCATGGGAG  
>MED12\_HsgRNA272  
AGATGTCATCACGTGTGAGCCACAGGGCTC  
>MED12\_HsgRNA273  
AGATGTCATCACGTGTGAGCCACAGGGCTC  
>MED12\_HsgRNA274  
CCCCGTCCAACCTGCCCATGCCAGAGGGTA  
>MED12\_HsgRNA275  
CCCCGTCCAACCTGCCCATGCCAGAGGGTA  
>MED12\_HsgRNA276  
TCTGGTCCTGGTTGAGGATGAGGCAGGCAT  
>MED12\_HsgRNA277  
TGTAGTGAACAGGACTCTGAGCCAGGGGCC  
>MED12\_HsgRNA278  
TGTAGTGAACAGGACTCTGAGCCAGGGGCC  
>MED12\_HsgRNA279  
CTGAGTGAAGGCACTGTTACCCCTCTGGCAT  
>MED12\_HsgRNA280  
CTGAGTGAAGGCACTGTTACCCCTCTGGCAT  
>MED12\_HsgRNA281  
ATGGGTGGCGTACTGCACGTGTCGTGGCTG  
>MED12\_HsgRNA282  
ATGGGTGGCGTACTGCACGTGTCGTGGCTG  
>MED12\_HsgRNA283  
TGAGGTGGGCAGTTTAGCAATGAGGGGGGC  
>MED12\_HsgRNA284  
TGAGGTGGGCAGTTTAGCAATGAGGGGGGC  
>MED12\_HsgRNA285  
CTCCGTGTACAGAAGTAGGCAAGCCGGCGG

>MED12\_HsgRNA286  
CTCCGTGTACAGAAGTAGGCAAGCCGGCGG  
>MED12\_HsgRNA287  
GCCTGTGTATCCAGAACTGCAGGAGGACA  
>MED12\_HsgRNA288  
GCCTGTGTATCCAGAACTGCAGGAGGACA  
>MED12\_HsgRNA289  
TGCGGTGTCTTGAAAAGGTGAAGGAGGATG  
>MED12\_HsgRNA290  
TGCGGTGTCTTGAAAAGGTGAAGGAGGATG  
>MED12\_HsgRNA291  
ATTTGTTCTTTAAATGGCTACAGGAGGTGT  
>MED12\_HsgRNA292  
ATTTGTTCTTTAAATGGCTACAGGAGGTGT  
>MED12\_HsgRNA293  
ACTTGTGTGGCCCTGGCAGGTGGGGGGCA  
>MED12\_HsgRNA294  
TTGCTAAACTGCCACCTCAGTCCAGGGAC  
>MED12\_HsgRNA295  
TTGCTAAACTGCCACCTCAGTCCAGGGAC  
>MED12\_HsgRNA296  
CCTTTAACACATGTCCCTGGACTGAGGTGG  
>MED12\_HsgRNA297  
CCTTTAACACATGTCCCTGGACTGAGGTGG  
>MED12\_HsgRNA298  
AGTTTAAGCAATTCATCCTCTCCAGGGCGG  
>MED12\_HsgRNA299  
AGTTTAAGCAATTCATCCTCTCCAGGGCGG  
>MED12\_HsgRNA300  
CGTGTACAGAAGTAGGCAAGCCGGCGGGAC  
>MED12\_HsgRNA301  
CGTGTACAGAAGTAGGCAAGCCGGCGGGAC  
>MED12\_HsgRNA302  
AGGATACAGCTGAGGCCAAAAACCAGGGGC  
>MED12\_HsgRNA303  
CTACTAGCCTGTGCCTGTGCATCGTGGCTG  
>MED12\_HsgRNA304  
CTACTAGCCTGTGCCTGTGCATCGTGGCTG  
>MED12\_HsgRNA305  
GTGGTAGGGGTCCGTACTCAGCATGGGAGC  
>MED12\_HsgRNA306  
GTGGTAGGGGTCCGTACTCAGCATGGGAGC  
>MED12\_HsgRNA307  
CTGCTAGTTGGGGGCTGAGGAGCAGGGGTG



>MED12\_HsgRNA308  
CCTCTATCACAGAACTTGGACCAGTGGACC  
>MED12\_HsgRNA309  
CCTCTATCACAGAACTTGGACCAGTGGACC  
>MED12\_HsgRNA310  
GTGCTATGGTGGTAGCCAAGCTCCTGGAGA  
>MED12\_HsgRNA311  
GTGCTATGGTGGTAGCCAAGCTCCTGGAGA  
>MED12\_HsgRNA312  
TAGTTCACCAGCATTAAAGGAGTGAAGGGAT  
>MED12\_HsgRNA313  
TAGTTCACCAGCATTAAAGGAGTGAAGGGAT  
>MED12\_HsgRNA314  
CAAGTCACTGAGTGCAGAATGGCTAGGAGT  
>MED12\_HsgRNA315  
CAAGTCACTGAGTGCAGAATGGCTAGGAGT  
>MED12\_HsgRNA316  
AGAATCAGAAGCCGCAGATGAGAAGGGTTC  
>MED12\_HsgRNA317  
AGAATCAGAAGCCGCAGATGAGAAGGGTTC  
>MED12\_HsgRNA318  
GCTGTCAGCTGCAAGCGTTCTGGTCGGCAT  
>MED12\_HsgRNA319  
GCTGTCAGCTGCAAGCGTTCTGGTCGGCAT  
>MED12\_HsgRNA320  
TGGGTCATCGGCAGGATCATCAAAGGGAGA  
>MED12\_HsgRNA321  
GGGCTCCAAAGGCAAGGTCCCCTCGGGAGA  
>MED12\_HsgRNA322  
GGGCTCCAAAGGCAAGGTCCCCTCGGGAGA  
>MED12\_HsgRNA323  
CCCGTCCAACCTGCCCATGCCAGAGGGTAA  
>MED12\_HsgRNA324  
CCCGTCCAACCTGCCCATGCCAGAGGGTAA  
>MED12\_HsgRNA325  
TGCTCCAGAACCGCATCGTGGATGGAGC  
>MED12\_HsgRNA326  
TGCTCCAGAACCGCATCGTGGATGGAGC  
>MED12\_HsgRNA327  
GCCTTCCCCAGACAAGCCTACAGTAGGAAT  
>MED12\_HsgRNA328  
ACCCTCTGGCATGGGCAGGTTGGACGGGGC  
>MED12\_HsgRNA329  
ACCCTCTGGCATGGGCAGGTTGGACGGGGC

>MED12\_HsgRNA330  
TTGTTCTGTCATCTTGCAGCGTTGTGGAGA  
>MED12\_HsgRNA331  
TTGTTCTGTCATCTTGCAGCGTTGTGGAGA  
>MED12\_HsgRNA332  
TCCTTCTTACTGAAAATGGGGACCTGGATG  
>MED12\_HsgRNA333  
GTCTTGAAAAGGTGAAGGAGGATGCGGCAG  
>MED12\_HsgRNA334  
GTCTTGAAAAGGTGAAGGAGGATGCGGCAG  
>MED12\_HsgRNA335  
GTAGTGAACAGGACTCTGAGCCAGGGGCC  
>MED12\_HsgRNA336  
GTAGTGAACAGGACTCTGAGCCAGGGGCC  
>MED12\_HsgRNA337  
GGATTGAGCTGCGGTGTCTTGAAAAGGTGA  
>MED12\_HsgRNA338  
AGGCTGAGCTGCTTCTCAAATCCTCGGATC  
>MED12\_HsgRNA339  
AGGCTGAGCTGCTTCTCAAATCCTCGGATC  
>MED12\_HsgRNA340  
TGGCTGCCTCCCAGAACCGCATCGTGGATG  
>MED12\_HsgRNA341  
TGGCTGCCTCCCAGAACCGCATCGTGGATG  
>MED12\_HsgRNA342  
TTGCTGCTCTACCACACACACCTGAGGCC  
>MED12\_HsgRNA343  
CTGATGCTGAGTGAATATTCCATGAGGTCC  
>MED12\_HsgRNA344  
CTGATGCTGAGTGAATATTCCATGAGGTCC  
>MED12\_HsgRNA345  
AAGGTGCTGGGAATAGTACCTGGGGGATG  
>MED12\_HsgRNA346  
AAGGTGCTGGGAATAGTACCTGGGGGATG  
>MED12\_HsgRNA347  
CCATTGGACGGTACTTCATACTTTGGAAG  
>MED12\_HsgRNA348  
CCTCTGGCATGGGCAGGTTGGACGGGGCAA  
>MED12\_HsgRNA349  
CCTCTGGCATGGGCAGGTTGGACGGGGCAA  
>MED12\_HsgRNA350  
TTTTTGGCCTCAGCTGTATCCTACAGGTAG  
>MED12\_HsgRNA351  
TTTTTGGCCTCAGCTGTATCCTACAGGTAG

>MED12\_HsgRNA352  
 AAAATGGGAGCACTGGGAGCAGAAAGGGAG  
 >MED12\_HsgRNA353  
 AAAATGGGAGCACTGGGAGCAGAAAGGGAG  
 >MED12\_HsgRNA354  
 GTTCTGGTCGGCATCGTGCTATGGTGGTAG  
 >MED12\_HsgRNA355  
 GTTCTGGTCGGCATCGTGCTATGGTGGTAG  
 >MED12\_HsgRNA356  
 TGCCTGTGCATCGTGGCTGTCCGCGGCAC  
 >MED12\_HsgRNA357  
 TGCCTGTGCATCGTGGCTGTCCGCGGCAC  
 >MED12\_HsgRNA358  
 CCCTTTAGCAGAGTCAGGGCATGTTGGGAC  
 >MED12\_HsgRNA359  
 CACATTATGACCAACACCAGGTCACGGCTC  
 >MED12\_HsgRNA360  
 CACATTATGACCAACACCAGGTCACGGCTC  
 >MED12\_HsgRNA361  
 ACCTTTCACATTATGACCAACACCAGGTCA  
 >MED12\_HsgRNA362  
 ACCTTTCACATTATGACCAACACCAGGTCA  
 >MED12\_HsgRNA363  
 AGCGTTCTGGTCGGCATCGTGCTATGGTGG  
 >MED12\_HsgRNA364  
 AGCGTTCTGGTCGGCATCGTGCTATGGTGG  
 >MED12\_HsgRNA365  
 ATACTTGCACCTCATCTCCCGAGGGGACC  
 >MED12\_HsgRNA366  
 ATACTTGCACCTCATCTCCCGAGGGGACC  
 >MED12\_HsgRNA367  
 CCCTTTGTAACCGAATCTTTGGATTGGGAC  
 >MED12\_HsgRNA368  
 CCCTTTGTAACCGAATCTTTGGATTGGGAC  
 >MED12\_HsgRNA369  
 ACTTTTGTTGCCATCCTCATCGCTCGGCAG  
 >MED12\_HsgRNA370  
 ACTTTTGTTGCCATCCTCATCGCTCGGCAG

(6)  $S_6^+$ : 38 high on-target activity sgRNAs targeting TADA2B

>TADA2B\_HsgRNA1  
 CGTGACAGACCACACCTGTCCCAGCGGAGG  
 >TADA2B\_HsgRNA2  
 CATTACGTGAGCATGTACATCCACGGGAAC

>TADA2B\_HsgRNA3  
CTGGAGATCCAGCCGCTTTCTGTGAGGAAA  
>TADA2B\_HsgRNA4  
GCTCAGCCACAGAGATGTCCAGCGGGGCA  
>TADA2B\_HsgRNA5  
CGGAAGCTGAAAGAGAGACAGCGGCGGAAG  
>TADA2B\_HsgRNA6  
GGGGAGTCCGGGAAGCACCAACGTGGGCAG  
>TADA2B\_HsgRNA7  
TAATAGTCTTCACAGTCACGTAGCGGGCTG  
>TADA2B\_HsgRNA8  
TGCTCAGCCACAGAGATGTCCAGCGGGGC  
>TADA2B\_HsgRNA9  
CTTGCATGACATGAACTGGTACAGCGCCT  
>TADA2B\_HsgRNA10  
CGGGCCAAGATCCGAGAAGTGCAGCGGTAC  
>TADA2B\_HsgRNA11  
CGCGCCACGTGGACATGTACGTGCGGAAG  
>TADA2B\_HsgRNA12  
GCTTCCGCACGTACATGTCCACGTGGGCGC  
>TADA2B\_HsgRNA13  
AGTACTGCGTGTACTGCCTGGCCGAGGTGA  
>TADA2B\_HsgRNA14  
GCTGCTGGACGCCATCGAGCAGTTCGGCTT  
>TADA2B\_HsgRNA15  
GGCGCTTCACGCTCTGGGGCCCGAGGCCG  
>TADA2B\_HsgRNA16  
AGCGGAAGCGCAGCGGGCTCACCTCGGCCA  
>TADA2B\_HsgRNA17  
CTGGGACAGGTGTGGTCTGTACGCGGTTG  
>TADA2B\_HsgRNA18  
CAGAGAGCCCGCTGATGAGCGTCTCGGCAT  
>TADA2B\_HsgRNA19  
AAGCGCAGCGGGCTCACCTCGGCCAGGCAG  
>TADA2B\_HsgRNA20  
TCGAGCAGTTCGGCTTCGGAAACTGGGTGA  
>TADA2B\_HsgRNA21  
CGCTGCAGTTCTCGGATCTTGGCCCGGAGC  
>TADA2B\_HsgRNA22  
CTCAGCCACAGAGATGTCCAGCGGGGGCAG  
>TADA2B\_HsgRNA23  
GGTAGCGGCGGTGGTGGCCGATCTCGGCGC  
>TADA2B\_HsgRNA24  
CACGGCTACCAGCTGGTGGACGGCGGGCGC

>TADA2B\_HsgRNA25  
 GTGCGGAAGCTGAAAGAGAGACAGCGGCGG  
 >TADA2B\_HsgRNA26  
 CGGGGCAGCGGGGTGGTGTAGGCTGGGTGA  
 >TADA2B\_HsgRNA27  
 CTCTGTGGCTGAGCAGCAGCAGCTGGGCTA  
 >TADA2B\_HsgRNA28  
 CACGTAATGCTCCATCACCTCTTGGGGAGT  
 >TADA2B\_HsgRNA29  
 GCATTACGTGAGCATGTACATCCACGGGAA  
 >TADA2B\_HsgRNA30  
 AGTTTCCGAAGCCGAAGTCTCGATGGCGT  
 >TADA2B\_HsgRNA31  
 AGCTTCCGCACGTACATGTCCACGTGGGCG  
 >TADA2B\_HsgRNA32  
 GCACTCGGTGCAGCGGAAGCGCAGCGGGCT  
 >TADA2B\_HsgRNA33  
 TTGGTGCTTCCCGACTCCCCAAGAGGTGA  
 >TADA2B\_HsgRNA34  
 AGGCTGGCACCAGATTGTAGTCACGGGCGA  
 >TADA2B\_HsgRNA35  
 AGCATGTACATCCACGGGAACCTGGGGAAG  
 >TADA2B\_HsgRNA36  
 TCGATGTCCTGGCACTCGGTGCAGCGGAAG  
 >TADA2B\_HsgRNA37  
 AGTCTTACAGTCACGTAGCGGGCTGGACT  
 >TADA2B\_HsgRNA38  
 GCCCTTTGTCATCGTAGGAAGATATGGCTG

(7)  $S_7^+$ : 22 high on-target activity sgRNAs targeting TADA1

>TADA1\_HsgRNA1  
 AGACAACAGCTGAAACAGCCTCCTCGGTGA  
 >TADA1\_HsgRNA2  
 TGACAACGCGTGAGAATGGCCAGGAGGAAA  
 >TADA1\_HsgRNA3  
 CAAGAAGAACTTAAGCGAGGCCCTGGGGGA  
 >TADA1\_HsgRNA4  
 CCAAAAATCTGACAACGCGTGAGAATGGCCA  
 >TADA1\_HsgRNA5  
 AGATACTGGGCTAACCTAAAGCTGTGGTTC  
 >TADA1\_HsgRNA6  
 TCTTACTGTTTCACGTTGTCCCCAGGGCC  
 >TADA1\_HsgRNA7  
 AAGAAGAACTTAAGCGAGGCCCTGGGGGAC

>TADA1\_HsgRNA8  
 GTTAAGAGCATAGACAGTATGTGTAGGGAT  
 >TADA1\_HsgRNA9  
 TTTTCAGCTGTTGTCTATGCTGTGGAGGTTG  
 >TADA1\_HsgRNA10  
 AATGATAGTACTGCTTATGAGCATGGGCT  
 >TADA1\_HsgRNA11  
 GGTTC AAGCAGAAGATCAGCAAAGAGGAGT  
 >TADA1\_HsgRNA12  
 CTTACTGTTTCACGTTGTCCCCAGGGCCT  
 >TADA1\_HsgRNA13  
 AGAAGA ACTTAAGCGAGGCCCTGGGGGACA  
 >TADA1\_HsgRNA14  
 CCAAGAAGAACTTAAGCGAGGCCCTGGGGG  
 >TADA1\_HsgRNA15  
 CCTCGAGTGGGAAGCATCATTGTGTGGGAA  
 >TADA1\_HsgRNA16  
 TAGGGATGACTTCCCTGTGCACCTGGGATT  
 >TADA1\_HsgRNA17  
 AGGCGCCAAGAAGAACTTAAGCGAGGCC  
 >TADA1\_HsgRNA18  
 CAATGGCGACCTTTGTGAGCGAGCTGGAGG  
 >TADA1\_HsgRNA19  
 ATGATAGTACTGCTTATGAGCATGGGCTG  
 >TADA1\_HsgRNA20  
 AGCATGGGCTGGACAATGTCACCGAGGAGG  
 >TADA1\_HsgRNA21  
 CTGTTTCAGCTGTTGTCTATGCTGTGGAGG  
 >TADA1\_HsgRNA22  
 TCCATTCTCACAATGATTTCCCTCCTGGCCA

(8)  $S_8^+$ : 13 high on-target activity sgRNAs targeting HPRT1

>HPRT1\_HsgRNA1  
 TTATAGCCCCCTTGAGCACACAGAGGGCT  
 >HPRT1\_HsgRNA2  
 TTGTAGCCCTCTGTGTGCTCAAGGGGGGCT  
 >HPRT1\_HsgRNA3  
 GCCGAGCTGCTCACCACGACGCCAGGGCTG  
 >HPRT1\_HsgRNA4  
 AATCATTATGCTGAGGATTTGGAAAGGGTG  
 >HPRT1\_HsgRNA5  
 TGGTCAGGCAGTATAATCCAAAGATGGTCA  
 >HPRT1\_HsgRNA6  
 TTAAGTAGAATGACCAGTCAACAGGGGACA

>HPRT1\_HsgRNA7  
 TTTGGAAAGGGTGTATTATTCTCATGGACT  
 >HPRT1\_HsgRNA8  
 TGGCGACCCGCAGCCCTGGCGTCGTGGTGA  
 >HPRT1\_HsgRNA9  
 TATAGCCCCCTTGAGCACACAGAGGGCTA  
 >HPRT1\_HsgRNA10  
 TGTAGCCCTCTGTGTGCTCAAGGGGGGCTA  
 >HPRT1\_HsgRNA11  
 GGCAGTATAATCCAAAGATGGTCAAGGTCG  
 >HPRT1\_HsgRNA12  
 CTCCGTTATGGCGACCCGCAGCCCTGGCGT  
 >HPRT1\_HsgRNA13  
 TTGCTCGAGATGTGATGAAGGAGATGGGAG

(9)  $S_9^+$ : 31 high on-target activity sgRNAs targeting CUL3

>CUL3\_HsgRNA1  
 TCAAAAAGCATGTCTTGGTGCTGGTGGGATG  
 >CUL3\_HsgRNA2  
 AAACAAGGTGAATCCGACCCAGAGAGGAAA  
 >CUL3\_HsgRNA3  
 GCACAAGTAACTGGCTCTAATACACGGAAG  
 >CUL3\_HsgRNA4  
 GGCCAATATCCTGTCTGTGAGCACCCGGACT  
 >CUL3\_HsgRNA5  
 TCAAACACAACGATGGATGAATTCAGGCAA  
 >CUL3\_HsgRNA6  
 TCTTACAGTCCGGGTGCTCACGACAGGATA  
 >CUL3\_HsgRNA7  
 GTTTACCACAGGCGAGGGACTGTAGGGCTC  
 >CUL3\_HsgRNA8  
 GATAAGCTGAAAAAGGGAGTCAAAGGGGTA  
 >CUL3\_HsgRNA9  
 CTAAATAACTTGTACATGCAACCAAGGTCT  
 >CUL3\_HsgRNA10  
 GAACCAATTGTAAAGGTGGTTGAAAGGGAA  
 >CUL3\_HsgRNA11  
 GAAACAGGAAGATGGATCTGAAGTTGGTGT  
 >CUL3\_HsgRNA12  
 ACGCCGAGGAGAGACTCACCCGAAAGGCC  
 >CUL3\_HsgRNA13  
 AGGGCTCTAACAAGCTCTCTTTCAGGGATA  
 >CUL3\_HsgRNA14  
 TTTACTTACCTGGATATAGTCAACAGGATT

>CUL3\_HsgRNA15  
 TGCAC TTTGGTGTGGCTGACTGAGTGGGCC  
 >CUL3\_HsgRNA16  
 ATATGAGCATCTCAAACACAACGATGGATG  
 >CUL3\_HsgRNA17  
 TGATGCACTGCCTTGACAAATCAACGGAAG  
 >CUL3\_HsgRNA18  
 TAGAGCCCTACAGTCCCTCGCCTGTGGTAA  
 >CUL3\_HsgRNA19  
 GTCCGGGTGCTCACGACAGGATATTGGCCC  
 >CUL3\_HsgRNA20  
 TATGGGTGTATTAGGGATCATCTACGGCAA  
 >CUL3\_HsgRNA21  
 TGATTAGAGACATACTAATGTACATGGTAA  
 >CUL3\_HsgRNA22  
 AGCTTATCATCAATAAATAATGAGAGGTAT  
 >CUL3\_HsgRNA23  
 ATAATGAGAGGTATTCAGGAGACCTGGAGT  
 >CUL3\_HsgRNA24  
 GCTGTGTTGGTTTACCACAGGCGAGGGACT  
 >CUL3\_HsgRNA25  
 TTTTTTAGGTA ACTCAGCAGTTGAAGGCGC  
 >CUL3\_HsgRNA26  
 AAGGTTCTACTTAGCCAAACACAGTGGTCG  
 >CUL3\_HsgRNA27  
 TCTCTTGGATATTACAGATGACCATGGATG  
 >CUL3\_HsgRNA28  
 CCTTTTTAACTGGTCCATAAAAATGTGGCAT  
 >CUL3\_HsgRNA29  
 CTGTTTTACATAGGTATCTTTAGGTGGTGT  
 >CUL3\_HsgRNA30  
 TGTTTTTCCTCCACAGACTGAATGTGGATG  
 >CUL3\_HsgRNA31  
 GCACTTTGGTGTGGCTGACTGAGTGGGCCA

(10)  $S_{10}^+$ : 148 high on-target activity sgRNAs targeting NF1

>NF1\_HsgRNA1  
 TTTTAAAAAACCTACCGTAAACTCGGGTCA  
 >NF1\_HsgRNA2  
 TTTAAAACAGACTTTCTCTCTAAGTGGTTT  
 >NF1\_HsgRNA3  
 ATGCAAAGCCATATGAAATTGTAGTGGACC  
 >NF1\_HsgRNA4  
 TGCAAAATTAAAACGACTCCTGAAGGGTAA



>NF1\_HsgRNA5  
CACAAACCTGTGGCAGATACACACTGGTCC  
>NF1\_HsgRNA6  
CTTCAAGCCCCTTTCGATTCTAGGTGGTGG  
>NF1\_HsgRNA7  
TTCGAAGTTGAGGGGGGAATTCTGAGGAGG  
>NF1\_HsgRNA8  
GTTAAATAGCATTGGATACAGAGCAGGACT  
>NF1\_HsgRNA9  
GCTCAATATCGCATTACTTAATTTAGGCAG  
>NF1\_HsgRNA10  
AGTAAATCCACTTACCTATAGGAAGGGTCA  
>NF1\_HsgRNA11  
TGGCACACACTTCGAAGTTGAGGGGGGAAT  
>NF1\_HsgRNA12  
AGTCACACATGCCAGAGATTGCTCAGGAAG  
>NF1\_HsgRNA13  
AGTTACAGTTATAGATATAGACTGCGGAGA  
>NF1\_HsgRNA14  
AGGTACATGAAAAAGAAGAATTC AAGGCTT  
>NF1\_HsgRNA15  
ACGGACCAATGTTAAGGATCTGGTGGTCT  
>NF1\_HsgRNA16  
TCCTACTGCACCGATGCTGTTCTGAGGGAA  
>NF1\_HsgRNA17  
ATACACTGGAAAAATGTCTTGCTGGGGTAA  
>NF1\_HsgRNA18  
AGATACTTATAGCTTCTTGCTCTCCAGGTCT  
>NF1\_HsgRNA19  
CTGAACTTCGGAATTCTGCCTCTGGGGTTT  
>NF1\_HsgRNA20  
ACTAAGAAAGTAACAACGTGGAAGAGGTAG  
>NF1\_HsgRNA21  
GGTTAGAACCATCAGAGAGCCTTGAGGAAA  
>NF1\_HsgRNA22  
TGCCAGAGATTGCTCAGGAAGCAATGGAGG  
>NF1\_HsgRNA23  
TCAGAGAGCCTTGAGGAAAACCAGCGGAAC  
>NF1\_HsgRNA24  
TACCAGCACATAGTGAAATGTAGAAGGTGA  
>NF1\_HsgRNA25  
GAGCAGCACTTCAGAAAAGAGTGATGGCAC  
>NF1\_HsgRNA26  
CAAAAGCCAAAATGGAAGATGGCCAGGTAA

>NF1\_HsgRNA27  
AAAAAGCCACCACCTAGAATCGAAAGGGGC  
>NF1\_HsgRNA28  
TCTGAGGAGGAACTGATGATGGCATGGAAG  
>NF1\_HsgRNA29  
AGAAAAGTAACAACGTGGAAGAGGTAGGGAA  
>NF1\_HsgRNA30  
CCAAAAGTCAGTACTGAGCACAAACAAGGAAT  
>NF1\_HsgRNA31  
GGACAGTCTACGAAAAGCTCTTGCTGGCCA  
>NF1\_HsgRNA32  
TTGCAGTGCCACTCCAGAGGATTCGGATT  
>NF1\_HsgRNA33  
GACCAGTGGACAGAAGCTCAAAGGTAT  
>NF1\_HsgRNA34  
TCAAAGTTTGAGGAATTTATGACTAGGTAA  
>NF1\_HsgRNA35  
CAAGATAAGGAGAATGATTTGTAGTGGCCA  
>NF1\_HsgRNA36  
CCAGATCCCACAGACTGATATGGCTGGTAA  
>NF1\_HsgRNA37  
AGCAATCTCTGGCATGTGTGACTGAGGGAC  
>NF1\_HsgRNA38  
GGATATGAATGATAGACTGGACAATGGCTT  
>NF1\_HsgRNA39  
ACCAATGCTCTCACCTTAAAGTGTGGTTG  
>NF1\_HsgRNA40  
TGATATTAATGACCAGTCCATGTGTGGAAG  
>NF1\_HsgRNA41  
CCACATTAGGCTTAGGTTACCACAAGGATC  
>NF1\_HsgRNA42  
CAAGATTCGGCCAAAAGATGTCCCTGGGAC  
>NF1\_HsgRNA43  
CAGGATTGATAAATCTGAGGAACATGGCAC  
>NF1\_HsgRNA44  
CTCCATTGCTTCCTGAGCAATCTCTGGCAT  
>NF1\_HsgRNA45  
TAGAATTGTTACAGTATATCAATGTGGATT  
>NF1\_HsgRNA46  
CTACCAAGCTGGGACTTCCAAAAGCTGGGAA  
>NF1\_HsgRNA47  
GTGACAATACACAGCATCAATCTTAGGCCA  
>NF1\_HsgRNA48  
CTGCCACATCAAGGGAATTGTTGAAGGACA

>NF1\_HsgRNA49  
CCTACAGGAATGGATCAACATGACTGGCTT  
>NF1\_HsgRNA50  
CGCACAGGCCGGTGGAAATGGGTCCAGGCCG  
>NF1\_HsgRNA51  
CAGTCATGTTGATCCATTCTGTAGGGAGT  
>NF1\_HsgRNA52  
ACACCCAAAGACAACAAGAGCTCTTGGTTG  
>NF1\_HsgRNA53  
AAAGCCACCACCTAGAATCGAAAGGGGCTT  
>NF1\_HsgRNA54  
TCAACCACCATGGACTGAACAAGTAGGAAA  
>NF1\_HsgRNA55  
TCAACCACGTCTTTGGATATATCTTGGATT  
>NF1\_HsgRNA56  
CAATCCATGGAATTGTGCAGAGTGTGGTGT  
>NF1\_HsgRNA57  
TTTTCTACTTGTTCAGTCCATGGTGGTTG  
>NF1\_HsgRNA58  
TGGCCGCGCACAGGCCGGTGGAAATGGGTCC  
>NF1\_HsgRNA59  
TGAGCGCGTGCCTGGTTTGCAATGGTTA  
>NF1\_HsgRNA60  
GAGTCGGGCTGTGACAGTTCCCAGCGGGTC  
>NF1\_HsgRNA61  
GTGGCTACTAAGAAAGTAACAACGTGGAAG  
>NF1\_HsgRNA62  
CCTGCTCGTCGAAGCGGCTGACCACGGCCT  
>NF1\_HsgRNA63  
TCGCCTCTGCACAAAGCCCTCTTTTGGGTA  
>NF1\_HsgRNA64  
AGTTCTGACAAAAATCCTTCAACAAGGCAC  
>NF1\_HsgRNA65  
TGGTCTGGCCGACAGTTGGATAGGTGGCTG  
>NF1\_HsgRNA66  
TGTCTGTTTCCGCCACCTCTGTGAGGAAG  
>NF1\_HsgRNA67  
CAATCTTAGGCCACCAATCCAATGCGGACT  
>NF1\_HsgRNA68  
CACTCTTCCAAAAATTCTAACGTGAGGTGT  
>NF1\_HsgRNA69  
ATAGCTTCTTGTCTCCAGGTCTGTAGGTTT  
>NF1\_HsgRNA70  
TTATCTTGTGTCCAGAAATAATCCAGGATA

>NF1\_HsgRNA71  
AACAGAAACTACCTGCTGCCACCTTGGCTT  
>NF1\_HsgRNA72  
TTCAGAACCTTTGGGAGAGGACCATGGCTG  
>NF1\_HsgRNA73  
TAGGGAAGATGAGCTGCCACATCAAGGGAA  
>NF1\_HsgRNA74  
GTAGGACAATCAGATGCTATATCAAGGAAA  
>NF1\_HsgRNA75  
CAATGAGATTAGATGAAACGATGCTGGTCA  
>NF1\_HsgRNA76  
TTGTGAGCTAGCTTGAGAGCATTGTGGAAT  
>NF1\_HsgRNA77  
CACAGAGGTGGCGGAAACAGGACATGGCAA  
>NF1\_HsgRNA78  
CATGGAGTCATGTATTCCAAACAAAGGTGT  
>NF1\_HsgRNA79  
CAGAGATTGCTCAGGAAGCAATGGAGGTAA  
>NF1\_HsgRNA80  
CCTTGCAGCCACCTATCCAACCTGTCGGCCA  
>NF1\_HsgRNA81  
TTAGGCAGTTCTGACCCGAGTTTACGGTAG  
>NF1\_HsgRNA82  
GCGTGCCTGGTTTGCAATGGTTAAGGTGA  
>NF1\_HsgRNA83  
TTTGGCCGAATCTTGGTGTGTTGGGGGATA  
>NF1\_HsgRNA84  
TATGGCTTTAAAGTCAGTAAGACATGGTAT  
>NF1\_HsgRNA85  
GTGAGGAAGCAGATATCCGGTGTGGGGTGG  
>NF1\_HsgRNA86  
GACTGGACAATGGCTTCACACTCCTGGTGC  
>NF1\_HsgRNA87  
CATGGGACATTCGCCTCTTAACAATGGTCT  
>NF1\_HsgRNA88  
TACAGGGCCACTTCTAGTTTGGTCTGGGCT  
>NF1\_HsgRNA89  
AGTCGGGCTGTGACAGTTCCCAGCGGGTCC  
>NF1\_HsgRNA90  
AAAGGGGCTTGAAGTTAATGTCAAAGGTGA  
>NF1\_HsgRNA91  
AGATGGTAGAATACCTGACAGACTGGGTTA  
>NF1\_HsgRNA92  
GATTGGTGGAACTGGTCACAATGATGGGTG

>NF1\_HsgRNA93  
TCAGGGTTCCACAGAAACATGTACAGGGCC  
>NF1\_HsgRNA94  
GAAAGTAACAACGTGGAAGAGGTAGGGAAG  
>NF1\_HsgRNA95  
GGCAGTACAGCAGAATTAATTACAGGGCTC  
>NF1\_HsgRNA96  
GGCTGTGACAGTCCCAGCGGGTCCGGATA  
>NF1\_HsgRNA97  
ATTGGTGGAAGTGGTCACAATGATGGGTGA  
>NF1\_HsgRNA98  
AATGGTGTGTAACCATGAGAAAGTGGGACT  
>NF1\_HsgRNA99  
CTTGGTGTGTTGGGGGATAGAGTCGGGCTG  
>NF1\_HsgRNA100  
CAGGGTTCCACAGAAACATGTACAGGGCCA  
>NF1\_HsgRNA101  
CCTTGTGTGCTCAGTACTGACTTTGGTAT  
>NF1\_HsgRNA102  
CTTTGTTTGAATACATGACTCCATGGCTG  
>NF1\_HsgRNA103  
AATTTAAAGAAAAACCTACAGACCTGGAGA  
>NF1\_HsgRNA104  
TCTATAACTGTAACCTCCTGGGTCAGGGAGT  
>NF1\_HsgRNA105  
GTGCTACCTATCTACAAAACTCCTGGATC  
>NF1\_HsgRNA106  
ATGTTACCTTAAGATCAACCACCATGGACT  
>NF1\_HsgRNA107  
GTCTTACTAATAGAGACAATAAAGAGGGTG  
>NF1\_HsgRNA108  
CCCTTAGAGCTTCCACACATGGACTGGTCA  
>NF1\_HsgRNA109  
TACGTAGTAATTCTTCATGATCCATGGACA  
>NF1\_HsgRNA110  
ATTGTAGTGGACCTTACCCATACCGGGCCT  
>NF1\_HsgRNA111  
TCTATATCTATAACTGTAACCTCCTGGGTCA  
>NF1\_HsgRNA112  
TGTGTCAATTAGTTGAAGTAATGATGGCAA  
>NF1\_HsgRNA113  
TGCTTCATACGGTGAGACAATGGCAGGATT  
>NF1\_HsgRNA114  
TCTATCATTCATATCCGGACCCGCTGGGAA

>NF1\_HsgRNA115  
AGACTCCATGCAGACTCTCTTCCGAGGCAA  
>NF1\_HsgRNA116  
GAATTCCGAAGTTCAGCTGCATGCTGGTTT  
>NF1\_HsgRNA117  
CGGGTCCGGATATGAATGATAGACTGGACA  
>NF1\_HsgRNA118  
GAATTCGTTGATCAAACCTCATCTGTGGTAT  
>NF1\_HsgRNA119  
CTCTTCTAAAGCCAAGGTGGCAGCAGGTAG  
>NF1\_HsgRNA120  
CCCATCTATTCAAGCAAAAATATGGGGAAG  
>NF1\_HsgRNA121  
AAGGTGAACTGGTTCTCATCTACTAGGCAG  
>NF1\_HsgRNA122  
TGCATGAAGGTGAGCGGCGTGCCCTGGTTT  
>NF1\_HsgRNA123  
CTGTTGACATCATATTGCTGACAGAGGCAA  
>NF1\_HsgRNA124  
TGGCTGATCGGTTTGAGAGATTGGTGAAC  
>NF1\_HsgRNA125  
AATGTGCAGAAAAGCTATTTGACTTGGTGG  
>NF1\_HsgRNA126  
TTTTTGCATCTTGGCAGGCTACACTGGTAA  
>NF1\_HsgRNA127  
CGATTGCTAGGCCCGGTATGGGTAAGTCC  
>NF1\_HsgRNA128  
ACAATGGCAGGATTGATAAATCTGAGGAAC  
>NF1\_HsgRNA129  
GAAGTGGCCCTGTACATGTTTCTGTGGAAC  
>NF1\_HsgRNA130  
AAGATGGTAGAATACCTGACAGACTGGGTT  
>NF1\_HsgRNA131  
CCAATGTGGTTCCTTGTCTCAGTGGGTAA  
>NF1\_HsgRNA132  
GGCATGTGTGACTGAGGGACCAGTTGGACG  
>NF1\_HsgRNA133  
GAAGTGTGTGCCACTGTTTATAACCAGGTAT  
>NF1\_HsgRNA134  
GGACTTACATTGGTGATGATTCGATGGAGT  
>NF1\_HsgRNA135  
ATCCTTACCAGCCATATCAGTCTGTGGGAT  
>NF1\_HsgRNA136  
TCATTTAGAAAGACTGATTGCCCTAGGACT

>NF1\_HsgRNA137  
 TGTATTAGCAAACGAGTGTCTCATGGGCAG  
 >NF1\_HsgRNA138  
 TGGATTATTTCTGGACACAAGATAAGGAGA  
 >NF1\_HsgRNA139  
 TGGCTTCACACTCCTGGTGCATGAAGGTGA  
 >NF1\_HsgRNA140  
 TTTGTTTCGCTCTGCTGAAGTTACTTGGACA  
 >NF1\_HsgRNA141  
 CACCTTCTACATTTCACTATGTGCTGGTAA  
 >NF1\_HsgRNA142  
 GCAGTTCTGACCCGAGTTTACGGTAGGTTT  
 >NF1\_HsgRNA143  
 GAAGTTGAGGGGGGAATTCTGAGGAGGAAC  
 >NF1\_HsgRNA144  
 TGGTTTGCAATGGTTAAGGTGAACTGGTTC  
 >NF1\_HsgRNA145  
 GTCATTGCCTTCCGTTCCAGTTACCGGGAC  
 >NF1\_HsgRNA146  
 TCTTTTGGCCGAATCTTGGTGTGTTGGGGG  
 >NF1\_HsgRNA147  
 TGGTTTGTCTACAAATTGAGTATTGGTAT  
 >NF1\_HsgRNA148  
 CTGTTTTAAAGCGATTGCTAGGCCCGGTATGGACGTGTTTCGGCCGGGGCGG

(11)  $S_{11}^+$ : 45 high on-target activity sgRNAs targeting NF2

>NF2\_HsgRNA1  
 ATGAAAAGATCTACTGCCCTCCTGAGGCTT  
 >NF2\_HsgRNA2  
 AAGCAACAATGGCCAACGAAGCACTGGTGA  
 >NF2\_HsgRNA3  
 AAGCAACCCAAGACGTTACCGTGAGGATC  
 >NF2\_HsgRNA4  
 TAAAAAGGGCACAGAGCTGCTGCTTGGAGT  
 >NF2\_HsgRNA5  
 GACTACGACCCCAAGTGTTCACAAGCGGGGA  
 >NF2\_HsgRNA6  
 AGGTACTGGATCATGATGTTTCAAAGGAAG  
 >NF2\_HsgRNA7  
 CCACAGATTCTCCAGCTATGTATCGGGAAC  
 >NF2\_HsgRNA8  
 GTTCAGCAGATGAAAGCCCAGGCCAGGGAG  
 >NF2\_HsgRNA9  
 TTCTAGCCTTCTCCTCCCTGGCCTGGGCTT

>NF2\_HsgRNA10  
AAAAATCCCCGCTTGTGAACACTGGGGTCG  
>NF2\_HsgRNA11  
GACGATCCTCACGGTGAACGTCTTGGGTTG  
>NF2\_HsgRNA12  
CGAGATGTTTCGGATTTCATTCCACGGGAA  
>NF2\_HsgRNA13  
TTTGATTGGTGTGCCGACTCTGGGGCTC  
>NF2\_HsgRNA14  
AGGCCACAGCGATTTCGCACGGAGGAGGAGA  
>NF2\_HsgRNA15  
GGCTCACCGGTACGTGGGCTTGGTGGCAA  
>NF2\_HsgRNA16  
CGTTCACCGTGAGGATCGTCACCATGGACG  
>NF2\_HsgRNA17  
GAAACATCTCGTACAGTGACAAGGAGGTAG  
>NF2\_HsgRNA18  
CATTCCACGGGAAGGAGATCTTGGGGGTCA  
>NF2\_HsgRNA19  
AGGACCTGCAGGAAGCACGCGAGGCGGAGC  
>NF2\_HsgRNA20  
ACGCCGAGATGGAGTTCAATTGCGAGGTAA  
>NF2\_HsgRNA21  
TGGCCTGGCTCAAAATGGACAAGAAGGTTG  
>NF2\_HsgRNA22  
AGGAGAAGCGCCTGATGGAGCAGAAGGTGC  
>NF2\_HsgRNA23  
TGACGATCCTCACGGTGAACGTCTTGGGTT  
>NF2\_HsgRNA24  
CTTTGATTGGTGTGCCGACTCTGGGGCT  
>NF2\_HsgRNA25  
AGAAGCCAGGAGCACAGAAGCCTCAGGAGG  
>NF2\_HsgRNA26  
ATCGGAACCATGATCTATTTATGAGGAGA  
>NF2\_HsgRNA27  
AAATGGAATATCTGAAGATAGCTCAGGACC  
>NF2\_HsgRNA28  
GCCAGGAGCACAGAAGCCTCAGGAGGGCAG  
>NF2\_HsgRNA29  
TGAGGGAGGAGGCTGAACGCACGAGGGATG  
>NF2\_HsgRNA30  
TCAGGGTCATAAATGTGAAGCCCCAGGGCA  
>NF2\_HsgRNA31  
TGCAGTACACAATCAAGGACACAGTGGCCT



>NF2\_HsgRNA32  
 CGGCGTCCATGGTGACGATCCTCACGGTGA  
 >NF2\_HsgRNA33  
 TTCTTACGCCGTCCAGGCCAAGGTAGGCTC  
 >NF2\_HsgRNA34  
 GCTGTCACCAATGAGGTTGAAGCTTGGTAT  
 >NF2\_HsgRNA35  
 TGTATCAGATGACTCCGGAAATGTGGGAGG  
 >NF2\_HsgRNA36  
 TCATTCCACGGGAAGGAGATCTTGGGGGTC  
 >NF2\_HsgRNA37  
 AGAGTCCGGCACACCAAATCAAAGAGGTCC  
 >NF2\_HsgRNA38  
 TTCTTCTTTGAGCCTACCTTGGCCTGGACG  
 >NF2\_HsgRNA39  
 TCTTTGAGCCTACCTTGGCCTGGACGGCGT  
 >NF2\_HsgRNA40  
 GTTTTGCCTCCTCCTCGGTGATCTGGGCCT  
 >NF2\_HsgRNA41  
 TCTTTGGACTGCAGTACACAATCAAGGACA  
 >NF2\_HsgRNA42  
 ATCTTGGGGGTCAGTCTGTTCTCAGGGTCA  
 >NF2\_HsgRNA43  
 GAGATGTTTCGGATTTTCATTCCACGGGAAG  
 >NF2\_HsgRNA44  
 AATTTTATCCTGAGAATGCTGAAGAGGAGC  
 >NF2\_HsgRNA45  
 CAGGTTTCTCGGAGCCCCAGAGTCCGGCAC

(12)  $S_{12}^+$ : 48 high on-target activity sgRNAs targeting CD5

>CD5\_HsgRNA1  
 CTTACACCAGCTTCTTGTAGACCAGAGGACC  
 >CD5\_HsgRNA2  
 CCACACTGCAGAGACTTACAGATGAGGTTC  
 >CD5\_HsgRNA3  
 AGAGACTTACAGATGAGGTTCCCAGGCCC  
 >CD5\_HsgRNA4  
 GTGGAGATCCAGATGGAAAACAAGTGGAAA  
 >CD5\_HsgRNA5  
 ATCCAGGCCAAGACCCAAACCCAGCGGGCC  
 >CD5\_HsgRNA6  
 CTGTAGTGAGACACAGCTCCCGTTCGGGGC  
 >CD5\_HsgRNA7  
 TTGGATATAGACCACGGAGATCCTTGGCAG

>CD5\_HsgRNA8  
ACAGATGAGGTTCCCCAGGCCAGGGGCCT  
>CD5\_HsgRNA9  
GCCAATTCGATGGGAGGCCCGAACGGGAG  
>CD5\_HsgRNA10  
TGTTCAATGAAGGGAAAGGACCAAGGGCCA  
>CD5\_HsgRNA11  
AGGCCACCCCTTCCAGACTGTCCGAGGCAG  
>CD5\_HsgRNA12  
CACACACTGCTGCCCCGACCAGGCGGCTC  
>CD5\_HsgRNA13  
CCAGCAGCACCACCAGGAGTACAAGGGTCA  
>CD5\_HsgRNA14  
CACCCAGCGTCCCAGCAGGTATGTGGCAG  
>CD5\_HsgRNA15  
ATTGCAGCTGGTGCCAGGACACGAAGGCCT  
>CD5\_HsgRNA16  
AAAACAGTGTGCAGTTCAGTTGGAGGCTG  
>CD5\_HsgRNA17  
CCTTCCGCTGAGCCTGATCTGCCTAGGTGG  
>CD5\_HsgRNA18  
CCCACCTAGGCAGATCAGGCTCAGCGGAAG  
>CD5\_HsgRNA19  
TCATCCTGACCCTTGTACTCCTGGTGGTGC  
>CD5\_HsgRNA20  
GTGGCGACCTCATCTCCTTCCACACGGTGG  
>CD5\_HsgRNA21  
TCCGCTGAGCCTGATCTGCCTAGGTGGGTG  
>CD5\_HsgRNA22  
GCTGCTGGCTGCCACATACCTGCTGGGAAC  
>CD5\_HsgRNA23  
TCTCCTGGGCACAGAGGAACCCGGGGGAGG  
>CD5\_HsgRNA24  
CACGGAGATCCTTGGCAGAAGACCTGGTTC  
>CD5\_HsgRNA25  
CTCAGATATCCAGGTGATGCTAAGTGGCTC  
>CD5\_HsgRNA26  
GTTTGCACACTGCAGAGGCCTGCTGGGCAT  
>CD5\_HsgRNA27  
TACAGCAGTGCTTCCAGAAAACAACGGCCC  
>CD5\_HsgRNA28  
TCCAGCCCAAGGTTTCAGAGCCGCCTGGTTCG  
>CD5\_HsgRNA29  
AACAGCTGAGATGTGGTGACCCCTTGGCCC

>CD5\_HsgRNA30  
 TGCTGCTGGCTGCCACATACCTGCTGGGAA  
 >CD5\_HsgRNA31  
 GAAGGGAAAGGACCAAGGGCCAAGGGGTCA  
 >CD5\_HsgRNA32  
 TCCTGGCACCAGCTGCAATCTGGGAGGAGC  
 >CD5\_HsgRNA33  
 CCTAGGCAGATCAGGCTCAGCGGAAGGCAC  
 >CD5\_HsgRNA34  
 AAGTGGCTCCAATTCCAAGTGCAGGGTCA  
 >CD5\_HsgRNA35  
 TGAAGGGAAAGGACCAAGGGCCAAGGGGTCA  
 >CD5\_HsgRNA36  
 CAGCGGGCCTGGCCCCAGGCACTGTGGCAA  
 >CD5\_HsgRNA37  
 GTCAGGGTCAAGTGGAGATCCAGATGGAAA  
 >CD5\_HsgRNA38  
 CTGGGGTCTGTTCAATGAAGGGAAAGGACC  
 >CD5\_HsgRNA39  
 CACAGGTGTGGTGAATTCTACAATGGCAG  
 >CD5\_HsgRNA40  
 TCTTGTAGACCAGAGGACCACACATGGCCA  
 >CD5\_HsgRNA41  
 GCCTGTCTTGGCCTTGTAGAGGATGGTGC  
 >CD5\_HsgRNA42  
 TGCAGTGTGCAAACAGCTGAGATGTGGTGA  
 >CD5\_HsgRNA43  
 CAGATCAGGCTCAGCGGAAGGCACTGGTCT  
 >CD5\_HsgRNA44  
 TGGTCTGCGGGTCTGTTCAATGAAGGGAAA  
 >CD5\_HsgRNA45  
 CAGGTCTTCTGCCAAGGATCTCCGTGGTCT  
 >CD5\_HsgRNA46  
 CCGCTGAGCCTGATCTGCCTAGGTGGGTGA  
 >CD5\_HsgRNA47  
 TATGTGGCAGCCAGCAGCACTTCGTGGGAG  
 >CD5\_HsgRNA48  
 GTTGTTCAGTTGGATATAGACCACGGAGA

(13)  $S_{13}^+$ : 15 high on-target activity sgRNAs targeting CD28

>CD28\_HsgRNA1  
 GACTACATGAACATGACTCCCCGGAGGCCT  
 >CD28\_HsgRNA2  
 CACGACCAGTGCCCAAAACAGCTTAGGAGA

>CD28\_HsgRNA3  
 CTCTCGTTGTCTAGGTAAGGCGGAGGGTAC  
 >CD28\_HsgRNA4  
 TTACCTAGACAACGAGAGGAGCAATGGAAC  
 >CD28\_HsgRNA5  
 GCTCCTCTCGTTGTCTAGGTAAGGCGGAGG  
 >CD28\_HsgRNA6  
 CAATGACACTCAGGCTGCTGTTCTTGGCTC  
 >CD28\_HsgRNA7  
 CCCTGCTTGTGGTAGATAGCAACGAGGTCA  
 >CD28\_HsgRNA8  
 CCTCGTTGCTATCTACCACAAGCAGGGGCG  
 >CD28\_HsgRNA9  
 GCCCTCATCAGAACAATGACACTCAGGCTG  
 >CD28\_HsgRNA10  
 GAACTCGGCATTTCGAGCGAAACTGGGGCTG  
 >CD28\_HsgRNA11  
 TGATTGACGTGCAGATTCCAGAGACGGAAC  
 >CD28\_HsgRNA12  
 AGGTTGTAGGAATACCTGCAGCTGAGGCTG  
 >CD28\_HsgRNA13  
 GGAATTCCGGGCATCCCTGTACAAGGGCGT  
 >CD28\_HsgRNA14  
 CAACTTCTTCTCAGTTCAAGTAACAGGTAA  
 >CD28\_HsgRNA15  
 CTCGTTGCTATCTACCACAAGCAGGGGCGA

(14)  $S_{14}^+$ : 34 high on-target activity sgRNAs targeting H2-K

>H2-K\_HsgRNA1  
 GCGGAGAATCCGAGATATGAGCCGCGGGCG  
 >H2-K\_HsgRNA2  
 AAGCAGAGAGACTCAGGGCCTACCTGGAGG  
 >H2-K\_HsgRNA3  
 CACCAGCCTGCTCCCACTTGTGTTTGGTGA  
 >H2-K\_HsgRNA4  
 TCGTAGGCGTACTGCTGGTACCCGCGGAGG  
 >H2-K\_HsgRNA5  
 CAGGAGGGGCCCCGAGTATTGGGAGCGGGAG  
 >H2-K\_HsgRNA6  
 AGGGCAATGAGCAGAGTTTCCGAGTGGACC  
 >H2-K\_HsgRNA7  
 CCACCACAGATGCCCACTTCTGGAAGGTTC  
 >H2-K\_HsgRNA8  
 TGATCACCAAACACAAGTGGGAGCAGGCTG

>H2-K\_HsgRNA9  
ACTTCCATGTACCGGGGCTCCCCGAGGCCG  
>H2-K\_HsgRNA10  
GTGACGAAATACCTCAGCGAGTGTGGGCCT  
>H2-K\_HsgRNA11  
TGAACGAAGACCTGAAAACGTGGACGGCGG  
>H2-K\_HsgRNA12  
GCGGCGCTGATCACCAAACACAAGTGGGAG  
>H2-K\_HsgRNA13  
CTCCCGGCCCGTACTCACCCGCGCGGGTC  
>H2-K\_HsgRNA14  
TAGGCGTACTGCTGGTACCCGCGGAGGAGT  
>H2-K\_HsgRNA15  
TCCACGTAGCCGACTTCCATGTACCGGGGC  
>H2-K\_HsgRNA16  
AGACCTGAAGATAAAGTCACCCTGAGGTGC  
>H2-K\_HsgRNA17  
TGCTCTGGTTGTAGTAGCCGAGCAGGGTCC  
>H2-K\_HsgRNA18  
AAATCTTCCACACAGATTCCCCAAAGGCC  
>H2-K\_HsgRNA19  
CTCGGAAACTCTGCTCATTGCCCTTGGCTT  
>H2-K\_HsgRNA20  
CAGAGAGACTCAGGGCCTACCTGGAGGGCA  
>H2-K\_HsgRNA21  
CCGAGATATGAGCCGCGGGCGGGTGGATG  
>H2-K\_HsgRNA22  
CCGAGCAGGGTCCTCAGGTCCACTCGGAAA  
>H2-K\_HsgRNA23  
GCGGGCGCGGTGGATGGAGCAGGAGGGGCC  
>H2-K\_HsgRNA24  
CGGCGCTGATCACCAAACACAAGTGGGAGC  
>H2-K\_HsgRNA25  
TCTGGCTGTGAAGTGGGGTCCGACGGGCGA  
>H2-K\_HsgRNA26  
CCCTGGCTCCGACTCAGACCCGCGGGGTG  
>H2-K\_HsgRNA27  
CGCGGGTCTGAGTCGGAGCCAGGGCGGCCG  
>H2-K\_HsgRNA28  
CCCCGTACATGGAAGTCGGCTACGTGGACG  
>H2-K\_HsgRNA29  
CCACGTAGCCGACTTCCATGTACCGGGGCT  
>H2-K\_HsgRNA30  
CGGGTACCAGCAGTACGCCTACGACGGCTG

>H2-K\_HsgRNA31  
CACGTAGCCGACTTCCATGTACCGGGGCTC  
>H2-K\_HsgRNA32  
CAGGTCTGCTGTGATGGGTCACATGGGCCT  
>H2-K\_HsgRNA33  
AGGCTGGTGAAGCAGAGAGACTCAGGGCCT  
>H2-K\_HsgRNA34  
TCTGTGTCTCCCGCTCCCAATACTCGGGCC

(15)  $S_{15}^+$ : 56 high on-target activity sgRNAs targeting CD45

>CD45\_HsgRNA1  
TGACAAAGACTTCTGTGTCCAGAAGGGCAA  
>CD45\_HsgRNA2  
CCAGAAATGATGATTGCTGCTCAGGGGCCA  
>CD45\_HsgRNA3  
CAGAAACGCCTAAGCCTAGTTGTGGGGATC  
>CD45\_HsgRNA4  
AGCTAAGGCGACAGAGGTGTCTGATGGTGC  
>CD45\_HsgRNA5  
CCAGAAGTTTGAGCCACAAACCCATGGTCA  
>CD45\_HsgRNA6  
AGACAATAGTATAAATGTTACATGTGGTCC  
>CD45\_HsgRNA7  
CATTAATGCATCCTTTGTGATGGTAGGTAC  
>CD45\_HsgRNA8  
CATCAATGTAGCTGGCATTATGTAGGTGG  
>CD45\_HsgRNA9  
TTGGAATGTCTCAGCTCAAAAGTTCGGAGA  
>CD45\_HsgRNA10  
ACTTACATAGCTGCACACCACCCAGGCCG  
>CD45\_HsgRNA11  
TGTAACATTTATACTATTGTCTGTCGGCCG  
>CD45\_HsgRNA12  
TCACACGATGTGAAGAAGGAAACAGGGTAA  
>CD45\_HsgRNA13  
CTGCACTTTCCAAGAGATTGAACAAGGCAC  
>CD45\_HsgRNA14  
GCGCAGAATACTGGCCAAGCATGGAGGAAG  
>CD45\_HsgRNA15  
GATGAGACAGTTGATGACTTCTGGAGGATG  
>CD45\_HsgRNA16  
CCTTAGTGCTGGTGTGGGCGTACAGGTAC  
>CD45\_HsgRNA17  
AACTATAGATTTATATGTACCACCAGGTGA

>CD45\_HsgRNA18  
TCTTATAGCATAAAAACATATCCATGGGGTT  
>CD45\_HsgRNA19  
TTTGATAGGTCCGGACAAGGTCAATGGAAT  
>CD45\_HsgRNA20  
TTTAATCAGATGATTATAACCGTGTGGAAC  
>CD45\_HsgRNA21  
TTTGATCAGGGCTTCAAGGAACCCAGGAAA  
>CD45\_HsgRNA22  
CAGGCAGCTCTTCCCCTTTCCATGTGGTAC  
>CD45\_HsgRNA23  
CCAGCATGGCATCAATTCCAATGTAGGTAC  
>CD45\_HsgRNA24  
AATACATTAATGCATCCTTTGTGATGGTAG  
>CD45\_HsgRNA25  
AGTACCAGTGTACCACATGGAAAGGGGAAG  
>CD45\_HsgRNA26  
AAGGCCTGGAAGCAGAGGGCAAAGTGGATG  
>CD45\_HsgRNA27  
GCTACCTGGTATTTCAGCCTCCAGAGGGGAG  
>CD45\_HsgRNA28  
CTCTCTGAAATAAATGGAGATGCAGGGTCC  
>CD45\_HsgRNA29  
GACAGAGATGGATCCCAGCAGACAGGGTTG  
>CD45\_HsgRNA30  
AGGTGAGGGTCTTCAGGAACCCCATGGTCT  
>CD45\_HsgRNA31  
GACAGAGGTGTCTGATGGTGCAAGTGGAGG  
>CD45\_HsgRNA32  
ACCTGAGTCTGCATCTAAACCCCATGGATA  
>CD45\_HsgRNA33  
TCTTGCAGCTGGATCCCCACAACCTAGGCTT  
>CD45\_HsgRNA34  
CCCAGCATCGTACCTGGCTCACAGTGGAGT  
>CD45\_HsgRNA35  
GATGGGAAACTTGCTGAATACCCGTGGAAT  
>CD45\_HsgRNA36  
AGCTGGATCCCCACAACCTAGGCTTAGGCGT  
>CD45\_HsgRNA37  
TCAGGGGCCACTAAAAGAAACGATCGGTGA  
>CD45\_HsgRNA38  
TTTAGGGCCATTAGTTTCATAAGGAGGACC  
>CD45\_HsgRNA39  
ACTTGTACTTAACTCCTAGGGCCCCGGGAT

>CD45\_HsgRNA40  
 ATGTGTAGCAGAAATCTTATATCGCGGTGT  
 >CD45\_HsgRNA41  
 ATTTGTATCTTTCAGAGCATTCCACGGGTA  
 >CD45\_HsgRNA42  
 AGAGGTGTCTGATGGTGCAAGTGGAGGTAC  
 >CD45\_HsgRNA43  
 GTTATAAATGTGCAGACAGATTTGGGGAGT  
 >CD45\_HsgRNA44  
 TTCCTAACCTGCAGTGGACGAGGATGGATG  
 >CD45\_HsgRNA45  
 CTTGTACTTAACTCCTAGGGCCCCGGGATG  
 >CD45\_HsgRNA46  
 CTTATAGCATAAAAACATATCCATGGGGTTT  
 >CD45\_HsgRNA47  
 TTCTTATAGCATAAAAACATATCCATGGGGT  
 >CD45\_HsgRNA48  
 TTTGTATCTTTCAGAGCATTCCACGGGTAT  
 >CD45\_HsgRNA49  
 GAAGTCATCAACTGTCTCATCCCGGGGCC  
 >CD45\_HsgRNA50  
 CCTTTCCATGTGGTACACTGGTACTGGTAC  
 >CD45\_HsgRNA51  
 GCTTTGCGTAGAGACTTTACCACTTGAAAA  
 >CD45\_HsgRNA52  
 ATCGTGTGACCATGACAATAACTGTGGCCT  
 >CD45\_HsgRNA53  
 GTCTTTACCTGCAGTGCACCACAATGGGAC  
 >CD45\_HsgRNA54  
 CCATTTATTTTCAGAGAGTTCCACACGGTTA  
 >CD45\_HsgRNA55  
 CCAATTCACCAGCTGGCCAGACCATGGGGT  
 >CD45\_HsgRNA56  
 TATGTTGTCAAGCTAAGGCGACAGAGGTGT

(16)  $S_{16}^+$ : 13 high on-target activity sgRNAs targeting THY1

>THY1\_HsgRNA1  
 AGCCAACCTCACCACCAAGGATGAGGGCGA  
 >THY1\_HsgRNA2  
 GTGCCAGTCTTGCAGGTGTCCCGAGGGCAG  
 >THY1\_HsgRNA3  
 TTCTCATGGCGGCAGTCCAGGCGAAGGTTT  
 >THY1\_HsgRNA4  
 TGTGCCAGTCTTGCAGGTGTCCCGAGGGCA



>THY1\_HsgRNA5  
 TTACCCTAGCCAACTTCACCACCAAGGATG  
 >THY1\_HsgRNA6  
 TTATCCTTGGTGTATTCTCATGGCGGCAG  
 >THY1\_HsgRNA7  
 GGTACGTGTGCTCGGGTATCCCAAGGGTGC  
 >THY1\_HsgRNA8  
 AGGGCTGGTTGGAGAGGGTGACGCGGGAGC  
 >THY1\_HsgRNA9  
 CATCCTTGGTGGTGAAGTTGGCTAGGGTAA  
 >THY1\_HsgRNA10  
 CACAGACAAGCTGGTCAAGTGTGGCGGCAT  
 >THY1\_HsgRNA11  
 CCTTGATATAGGGCTGGTTGGAGAGGGTGA  
 >THY1\_HsgRNA12  
 TCTCGGGTCAGGCTGAACTCATGCTGGATG  
 >THY1\_HsgRNA13  
 TTGGTGGTGAAGTTGGCTAGGGTAAGGACC

(17)  $S_{17}^+$ : 35 high on-target activity sgRNAs targeting CD43

>CD43\_HsgRNA1  
 ACAGAACTGGTTGCTGTGGTAGCAGGGAGT  
 >CD43\_HsgRNA2  
 CGCCACAACAGCAGTAGCGCCACGAGGGCC  
 >CD43\_HsgRNA3  
 GAAGACAATTCAGTAGTTTCCAAGGGGGTTC  
 >CD43\_HsgRNA4  
 AAGAAGACAATTCAGTAGTTTCCAAGGGGG  
 >CD43\_HsgRNA5  
 CTGCAGTTCCGTCTGTCCACAGGATTGGCTG  
 >CD43\_HsgRNA6  
 AAGACAATTCAGTAGTTTCCAAGGGGGTCA  
 >CD43\_HsgRNA7  
 GTCACCACAGCTACTGGGTCTCTGGGGCCC  
 >CD43\_HsgRNA8  
 AATGCCAGCCCATCAGTTTCTGTGGGGTCA  
 >CD43\_HsgRNA9  
 TCTACCCAAGATCCCATAACCACCAGGTCA  
 >CD43\_HsgRNA10  
 TGGACCCAGCATGCCCAAAGAGGAGGAGA  
 >CD43\_HsgRNA11  
 GTCCCTGACCCACAGAACTGATGGGCTG  
 >CD43\_HsgRNA12  
 GGAGCTTACTGTTGTAGCCACAGAGGGTCC

>CD43\_HsgRNA13  
ATGTCTTGCTGGAAACTTCCTGAGAGGCAG  
>CD43\_HsgRNA14  
GCTGGAAACTTCCTGAGAGGCAGTAGGCTC  
>CD43\_HsgRNA15  
AGAAGACAATTCAGTAGTTTCCAAGGGGGT  
>CD43\_HsgRNA16  
ACAGGATTGGCTGCAGTGACAGGAGGGTCA  
>CD43\_HsgRNA17  
CCTTGCACCTTCTCCTCCTCTTTGGGGCAT  
>CD43\_HsgRNA18  
CACTGCAGCCAATCCTGTGACAGACGGACC  
>CD43\_HsgRNA19  
CACTGCAGCCAATCCTGTGACAGACGGACC  
>CD43\_HsgRNA20  
CACTGCAGCCAATCCTGTGACAGACGGACC  
>CD43\_HsgRNA21  
CACTGCAGCCAATCCTGTGACAGACGGACC  
>CD43\_HsgRNA22  
CACTGCAGCCAATCCTGTGACAGACGGACC  
>CD43\_HsgRNA23  
CACTGCAGCCAATCCTGTGACAGACGGACC  
>CD43\_HsgRNA24  
CACTGCAGCCAATCCTGTGACAGACGGACC  
>CD43\_HsgRNA25  
CACTGCAGCCAATCCTGTGACAGACGGACC  
>CD43\_HsgRNA26  
ATTGGCTGCAGGTCCGTCTGTCACAGGATT  
>CD43\_HsgRNA27  
AGATGCTGCAGTTCCGTCTGTCACAGGATT  
>CD43\_HsgRNA28  
ATGGGCTGGCATTCTGGGCTTCAGAGGTAC  
>CD43\_HsgRNA29  
TGGAGCTGTGATATGTGGGGTAGATGGTAG  
>CD43\_HsgRNA30  
ACCTGGACCCAGCATGCCCCAAAGAGGAGG  
>CD43\_HsgRNA31  
TCTGGGGCCCTCGAGTGAGATGCATGGACT  
>CD43\_HsgRNA32  
TTGTGGTCTGCCCCAGGGGCTGATGGTCT  
>CD43\_HsgRNA33  
AGAGGTACTTGGAGCTGTGATATGTGGGGT  
>CD43\_HsgRNA34  
TCTTTGGGGCATGCTGGGTCCAGGTGGCGA

>CD43\_HsgRNA35  
TTGATTCTTGGCTTGGTGACCTGGTGGTTA

(18) S<sub>1</sub>: 377 low on-target activity sgRNAs targeting CD13

>CD13\_LsgRNA1  
TCAGAAATAATACCAACAACCTGGAGGGAGA  
>CD13\_LsgRNA2  
GTCAAACAGCTCACTGATCTGGGCCGGCGT  
>CD13\_LsgRNA3  
CATGAACCGCTGGACCCTGCAGATGGGCTT  
>CD13\_LsgRNA4  
CCAGAACGATCTCTTCAGCACATCAGGCAA  
>CD13\_LsgRNA5  
CGGTAACGATTCCACGCTTTACTTTGGTCC  
>CD13\_LsgRNA6  
TAAAAACGTACAGGCCCTGTCATTGGGGG  
>CD13\_LsgRNA7  
GTGGAACCTCAGTGACATTCCAGTTGGGGTC  
>CD13\_LsgRNA8  
TGGAAATATAGAAGCCCTTGGCCATGGTGA  
>CD13\_LsgRNA9  
TAGGAATCGGGTTTCAGCGTGTGGGGAGG  
>CD13\_LsgRNA10  
TCATAATGACCAGCAAAGAAGTTAAGGATG  
>CD13\_LsgRNA11  
CGGTACACATCATTTCAGCACCATGAGGTCT  
>CD13\_LsgRNA12  
CAGAACACCATCTACCTGAACCTGTGGGAC  
>CD13\_LsgRNA13  
AACTACACCCTCAGCCAGGGGCACAGGGTG  
>CD13\_LsgRNA14  
CCTCACACCTTGCAGATCCGGATCTGGGCC  
>CD13\_LsgRNA15  
GTGCACACGGCTGCCACGCCAGGAGGATC  
>CD13\_LsgRNA16  
GGAGACACTCACGGTTATTATTGGGGTTC  
>CD13\_LsgRNA17  
AGTGACAGGGACCTTATGGGCACTGGGAAT  
>CD13\_LsgRNA18  
TTGGACAGGGCTGTCAGGTCCTTGGGGTGG  
>CD13\_LsgRNA19  
AGTGACATTCCAGTTGGGGTCTTCTGGAAG  
>CD13\_LsgRNA20  
AATGACCAGCAAAGAAGTTAAGGATGGGGC

>CD13\_LsgRNA21  
CTCCACCCACAGGCTGTGAACAACCGGTCC  
>CD13\_LsgRNA22  
TTCAACGCCGGCGCCATGGAGAACTGGGGA  
>CD13\_LsgRNA23  
GCGGACGGGGTGGTGGAGGCCACGGGGGAG  
>CD13\_LsgRNA24  
AAAAACGTACAGGCCCTGTCATTGGGGGT  
>CD13\_LsgRNA25  
TCGAACTCGCTGTCCATCTCATACTGGCTG  
>CD13\_LsgRNA26  
GAGAACTGGGGACTGGTGACCTACCGGGAG  
>CD13\_LsgRNA27  
GGGAGACACTCACGGTTATTATTGGGGT  
>CD13\_LsgRNA28  
CAGTAGACGGTGGACCGCAGGTTGGGGTGG  
>CD13\_LsgRNA29  
TGCCAGACTTCAACGCCGGCGCCATGGAGA  
>CD13\_LsgRNA30  
ACACAGATGCAGGCTGCAGATGCCCGGAAG  
>CD13\_LsgRNA31  
TATGAGATGGACAGCGAGTTCGAGGGGGAG  
>CD13\_LsgRNA32  
GGCCAGCAAGTACGTGGACATCTTGGGCGT  
>CD13\_LsgRNA33  
CCTCAGCCACCACCAACCCCGCCTCGGCCA  
>CD13\_LsgRNA34  
AGGGAGCCCTTGAGGTGCACCACCAGGTAC  
>CD13\_LsgRNA35  
AGGCAGCGGAGCACTCACCTGGCCAGGTTG  
>CD13\_LsgRNA36  
GAGGAGCGGGCTGCACCTTGCTGTAGGAGA  
>CD13\_LsgRNA37  
TCTCAGCGTCACCCGGTAGGAATCGGGTTT  
>CD13\_LsgRNA38  
CACCAGCTCAGTCTTGTCAATGTCGGGGGG  
>CD13\_LsgRNA39  
GAGGAGGACAGGGGGTCGAACAGCAGGGAG  
>CD13\_LsgRNA40  
TTCTAGGCCATCCCTGTCATCAATCGGGCA  
>CD13\_LsgRNA41  
TCCGAGGCGGGTGTGGACAGCGGGTGGGAG  
>CD13\_LsgRNA42  
GCCCAGGGTGCAGTACTCACCGCCAGGCC

>CD13\_LsgRNA43  
GCACAGGGTGGTCCTGCGTGGTGTGGGAGG  
>CD13\_LsgRNA44  
GCCCAGTGCCATTGCGGCGGGCCACGGCGA  
>CD13\_LsgRNA45  
ACGGAGTTCCAGAGTGTGAGGAGATGGTCT  
>CD13\_LsgRNA46  
TTCCAGTTGGGGTCTTCTGGAAGTGGGGTG  
>CD13\_LsgRNA47  
TGCCATCAGCACCGCCTGCTCCAACGGAGT  
>CD13\_LsgRNA48  
CATAATCGCCGTGGCCCGCCCAATGGCAC  
>CD13\_LsgRNA49  
TGGCATCGCCTCCCCAGACCAGATTGGCCT  
>CD13\_LsgRNA50  
CCCCATCTGCTCACTTGAATTCTGAGGGGC  
>CD13\_LsgRNA51  
AATGATCTGTGCCCGATTGATGACAGGGAT  
>CD13\_LsgRNA52  
ATTAATGACGCCTTCAACCTGGCCAGGTGA  
>CD13\_LsgRNA53  
GTTTCATGATGTCCCGCACGGTGGTGGGAG  
>CD13\_LsgRNA54  
TACCATGCACCTCCGTACCTTCATGGGGCC  
>CD13\_LsgRNA55  
CTTCATGGCCGGCTCATCGAAGCATGGGAA  
>CD13\_LsgRNA56  
CTCCATGGCGCCGGCGTTGAAGTCTGGCAG  
>CD13\_LsgRNA57  
CCTGATGTGCTGAAGAGATCGTTCTGGGCT  
>CD13\_LsgRNA58  
TATTATTTCTGAAGTGAATGAAGAGGGGTG  
>CD13\_LsgRNA59  
ACTGCAACGCTATCGCCAGGGCGGGGAGG  
>CD13\_LsgRNA60  
GCTCCAACGGAGTTCCAGAGTGTGAGGAGA  
>CD13\_LsgRNA61  
ACCTCAATGTGACGGGCTATTACCGGGTGA  
>CD13\_LsgRNA62  
TGTGCACAATCATCGCACTGTCAGTGGTGT  
>CD13\_LsgRNA63  
AGGTCACCAGTCCCCAGTTCTCCATGGCGC  
>CD13\_LsgRNA64  
AGAACACCATCTACCTGAACCTGTGGGACC

>CD13\_LsgRNA65  
TGACCACCCGCTCCTTGTGCTGCTGGAGG  
>CD13\_LsgRNA66  
ACTACACCCTCAGCCAGGGGCACAGGGTGG  
>CD13\_LsgRNA67  
GGACCACCCTGTGCCCTGGCTGAGGGTGT  
>CD13\_LsgRNA68  
CCAGCACCGTCCGTTTCACCTGCAAGGAGG  
>CD13\_LsgRNA69  
CTCACACCTTGCAGATCCGGATCTGGGCCC  
>CD13\_LsgRNA70  
CCCGCACGGTGGTGGGGAGTTGGATGGACC  
>CD13\_LsgRNA71  
GGAGCACTCACCTGGCCAGGTTGAAGGCGT  
>CD13\_LsgRNA72  
ATGGCACTGGGCCGGGCCAGATCCGGATC  
>CD13\_LsgRNA73  
TGGTCACTGTGATTGCTCATGAGCTGGCCC  
>CD13\_LsgRNA74  
ACCCCACTTCCAGAAGACCCCAACTGGAAT  
>CD13\_LsgRNA75  
CCATCAGAGATGGCAGACAGCAGCAGGACT  
>CD13\_LsgRNA76  
GCGCCAGAGTGACAGGGACCTTATGGGCAC  
>CD13\_LsgRNA77  
TGACCAGCAAAGAAGTTAAGGATGGGGCCC  
>CD13\_LsgRNA78  
AGGCCAGCAAGTACGTGGACATCTTGGGCG  
>CD13\_LsgRNA79  
ATACCAGCACGGGGACCCTTTCCCAGGAGC  
>CD13\_LsgRNA80  
CCTCCAGCAGCAACAAGGAGCGGGTGGTCA  
>CD13\_LsgRNA81  
CGAACAGCAGGGAGTTCTCCCGGTAGGTCA  
>CD13\_LsgRNA82  
TGGACAGCGAGTTCGAGGGGGAGTTGGCAG  
>CD13\_LsgRNA83  
GTCTCAGCGTCACCCGGTAGGAATCGGGTT  
>CD13\_LsgRNA84  
CCACCAGCTCAGTCTTGTCAATGTCGGGGG  
>CD13\_LsgRNA85  
TGGGCAGCTGGCTTACCAAGTTCCAGGTGG  
>CD13\_LsgRNA86  
GGCACAGGGTGGTCCTGCGTGGTGTGGGAG

>CD13\_LsgRNA87  
GGTTCAGGTAGATGGTGTCTGCTAGGCAA  
>CD13\_LsgRNA88  
GCCACAGGTCATTCCACCACTCTATGGTCA  
>CD13\_LsgRNA89  
CTGACAGTGCGATGATTGTGCACACGGCTG  
>CD13\_LsgRNA90  
ATTCCAGTTGGGGTCTTCTGGAAGTGGGGT  
>CD13\_LsgRNA91  
ATCTCATACTGGCTGTCCTTCACCAGGGAG  
>CD13\_LsgRNA92  
GGTTCATGATGTCCCGCACGGTGGTGGGGA  
>CD13\_LsgRNA93  
CTACCATGCACCTCCGTACCTTCATGGGGC  
>CD13\_LsgRNA94  
AGATCATTAATGACGCCTTCAACCTGGCCA  
>CD13\_LsgRNA95  
CCGACATTGACAAGACTGAGCTGGTGGAGC  
>CD13\_LsgRNA96  
GTAACATTGGAATCGGGGTCAAGGAGGAAG  
>CD13\_LsgRNA97  
TGGTCCAAGGTGGTGGCCGAGGCGGGTTG  
>CD13\_LsgRNA98  
ATTTCCAAGTCCCTGGGCATCCTGGGGATC  
>CD13\_LsgRNA99  
AGGACCACCCTGTGCCCCTGGCTGAGGGTG  
>CD13\_LsgRNA100  
GCTGCCACGCCAGGAGGATCCCCAGGATG  
>CD13\_LsgRNA101  
GATTCCACGCTTTACTTTGGTCCAAGGTGG  
>CD13\_LsgRNA102  
TTCCCCAGA ACTACCTGAAGAAGCAGGTCA  
>CD13\_LsgRNA103  
AGCGCCAGAGTGACAGGGACCTTATGGGCA  
>CD13\_LsgRNA104  
ATGACCAGCAAAGAAGTTAAGGATGGGGCC  
>CD13\_LsgRNA105  
GTGCCATAAGGTCCCTGTCACTCTGGCGC  
>CD13\_LsgRNA106  
CCTCCCCACCATCACCATGGCCAAGGGCTT  
>CD13\_LsgRNA107  
CCACCCCAGGGCGCCTCAGTCCTCAGGATG  
>CD13\_LsgRNA108  
GGGCCCCATCCTTAACCTTCTTTGCTGGTCA

>CD13\_LsgRNA109  
GGATCCCAGGATGCCAGGGACTTGAAAA  
>CD13\_LsgRNA110  
CCAACCCCGCCTCGGCCACCACCTTGGACC  
>CD13\_LsgRNA111  
CTGACCCCTCCCCCACAGTGGTTCGGGAA  
>CD13\_LsgRNA112  
GTCACCCCTGGGGCAGGTACAGCGAGGTTA  
>CD13\_LsgRNA113  
ATGTCCCGCACGGTGGTGGGGAGTTGGATG  
>CD13\_LsgRNA114  
CCCACCCGCTGTCCACACCCGCCTCGGAGA  
>CD13\_LsgRNA115  
CACACCCTACCCACTCCAAAAATCAGGTGA  
>CD13\_LsgRNA116  
TGACCCCTCCCCCACAGTGGTTCGGGAAC  
>CD13\_LsgRNA117  
ATCTCCGAGGCGGGTGTGGACAGCGGGTGG  
>CD13\_LsgRNA118  
TGGACCGCAGGTTGGGGTGGATCCTGGTGT  
>CD13\_LsgRNA119  
TGGCCCGCCGCAATGGCACTGGGCCGGGCC  
>CD13\_LsgRNA120  
CCACCCGCTCCTTGTTGCTGCTGGAGGAGG  
>CD13\_LsgRNA121  
GGGCCCAGCCAGTGCCATTGCGGCGGGCC  
>CD13\_LsgRNA122  
TAGCCCGTCACATTGAGGTTTACAGCAGGACC  
>CD13\_LsgRNA123  
ACACCCTCAGCCAGGGGCACAGGGTGGTCC  
>CD13\_LsgRNA124  
TCCTCCTCCAGCAGCAACAAGGAGCGGGTG  
>CD13\_LsgRNA125  
CTGACCTCCTGCAGGTGGTCCCACAGGTTC  
>CD13\_LsgRNA126  
GCATCCTGAGGACTGAGGCGCCCTGGGGTG  
>CD13\_LsgRNA127  
GGGTCTGCTGAACCTCAATGTGACGGGCT  
>CD13\_LsgRNA128  
GTGACCTGCTTCTTCAGGTAGTTCTGGGGA  
>CD13\_LsgRNA129  
GCATCCTGGGGATCCTCCTGGGCGTGGCAG  
>CD13\_LsgRNA130  
TGAACCTGTGGGACCACCTGCAGGAGGTCA



>CD13\_LsgRNA131  
CTGTCCTTCACCAGGGAGCCCTTGAGGTGC  
>CD13\_LsgRNA132  
GGGTGGAACAGCAGGGAGTTCTCCCGGTAG  
>CD13\_LsgRNA133  
TCATCGAAGCATGGGAAGGACTTCCGGGCA  
>CD13\_LsgRNA134  
GAGGCGAAGCCCTCGTTCAGCCACAGGTCA  
>CD13\_LsgRNA135  
CCCCCGACATTGACAAGACTGAGCTGGTGG  
>CD13\_LsgRNA136  
TCCCCGAGATGGGGGTCTACCTGGTGGGCC  
>CD13\_LsgRNA137  
GCTCCGAGGTCTATGGCCCCATGAAGGTAC  
>CD13\_LsgRNA138  
ACGGCGATTATGCCCTGAACGTGACGGGCC  
>CD13\_LsgRNA139  
CCGGCGCCATGGAGAACTGGGGACTGGTGA  
>CD13\_LsgRNA140  
GGCCCCGCCAATGGCACTGGGCCGGGCC  
>CD13\_LsgRNA141  
TCAACGCCGGCGCCATGGAGAACTGGGGAC  
>CD13\_LsgRNA142  
ATGGCGCCGGCGTTGAAGTCTGGCAGGCCA  
>CD13\_LsgRNA143  
GCTTCGCCTCCTACGTGGAGTACCTGGGTG  
>CD13\_LsgRNA144  
CACCCGCCTCGGAGATCAACACGCCGGGCC  
>CD13\_LsgRNA145  
GCAACGCTATCGCCAGGGCGGGGAGGAGG  
>CD13\_LsgRNA146  
AACACGCTGAAACCCGATTCTACCGGGTG  
>CD13\_LsgRNA147  
TACTCGCTGCGGTAGAAGCCCGCCAGGTCA  
>CD13\_LsgRNA148  
TCCACGCTTTACTTTGGTCCAAGGTGGTGG  
>CD13\_LsgRNA149  
GGCCCCGCCAGTGCCATTGCGGCGGGCCA  
>CD13\_LsgRNA150  
CGGACGGGGTGGTGGAGGCCACGGGGGAGC  
>CD13\_LsgRNA151  
GAATCGGGTTTCAGCGTGTGGGGAGGCGG  
>CD13\_LsgRNA152  
GGTACGGTCTCAGCGTCACCCGGTAGGAAT

>CD13\_LsgRNA153  
TAGACGGTGGACCGCAGGTTGGGGTGGATC  
>CD13\_LsgRNA154  
AAAACGTACAGGCCCTGTCATTGGGGGTG  
>CD13\_LsgRNA155  
AGACCGTACCTCACCCCAATGACAGGGGC  
>CD13\_LsgRNA156  
ATGGCGTCAAACAGCTCACTGATCTGGGCC  
>CD13\_LsgRNA157  
GTCACGTTCAAGGCATAATCGCCGTGGCCC  
>CD13\_LsgRNA158  
GCTTCTACCGCAGCGAGTACATGGAGGGCA  
>CD13\_LsgRNA159  
GAAGCTCAACTACACCCTCAGCCAGGGGCA  
>CD13\_LsgRNA160  
CCCCTCACCTTTGGGAAGCATGTTGGACA  
>CD13\_LsgRNA161  
TCTGCTCACTTGAATTCTGAGGGGCGGGTA  
>CD13\_LsgRNA162  
CCAGCTCAGTCTTGTCAATGTCGGGGGGCT  
>CD13\_LsgRNA163  
CCTCCTCCAGCAGCAACAAGGAGCGGGTGG  
>CD13\_LsgRNA164  
AGAGCTCCCACTCACTGGTCCATCAGGTTT  
>CD13\_LsgRNA165  
TGGCCTCCTTGCAGGTGAAACGGACGGTGC  
>CD13\_LsgRNA166  
CCCCTCCTTGTGCTGCTGGAGGAGGACA  
>CD13\_LsgRNA167  
CACACTCTGGAACCTCCGTTGGAGCAGGCGG  
>CD13\_LsgRNA168  
GGTCTGACTATGCGGAGCCCACCTGGAAC  
>CD13\_LsgRNA169  
CGGGCTGCACCTTGCTGTAGGAGATGGCGT  
>CD13\_LsgRNA170  
CCATCTGCTCACTTGAATTCTGAGGGGCGG  
>CD13\_LsgRNA171  
CAGGCTGCTCAGGGCGGCCTCCCAGGGCAT  
>CD13\_LsgRNA172  
GGTCTGCTGAACCTCAATGTGACGGGCTA  
>CD13\_LsgRNA173  
CCTGCTGCTGTCTGCCATCTCTGATGGATG  
>CD13\_LsgRNA174  
TGACCTGCTTCTCAGGTAGTTCTGGGGAA

>CD13\_LsgRNA175  
AAGTCTGGCAGGCCAATCTGGTCTGGGGAG  
>CD13\_LsgRNA176  
GCAGCTGGCTTACCAAGTTCCAGGTGGGCT  
>CD13\_LsgRNA177  
GCTCCTGGGAAAGGGTCCCCGTGCTGGTAT  
>CD13\_LsgRNA178  
AGAAGTGGGGACTGGTGACCTACCGGGAGA  
>CD13\_LsgRNA179  
CGTGCTGGTATCCACCGTGATGACCGGGAA  
>CD13\_LsgRNA180  
GCCCCGTGCATTGGGGGTGAGGTACGGTCT  
>CD13\_LsgRNA181  
AGCCCTGTCCAACATGCTTCCCAAAGGTGA  
>CD13\_LsgRNA182  
GTACCTTCATGGGGCCATAGACCTCGGAGC  
>CD13\_LsgRNA183  
AGTCCCTCCCATGCTTCGATGAGCCGGCCA  
>CD13\_LsgRNA184  
CATGCTTCGATGAGCCGGCCATGAAGGCCG  
>CD13\_LsgRNA185  
CGGGCTTCTACCGCAGCGAGTACATGGAGG  
>CD13\_LsgRNA186  
AGGGCTTCTATATTTCCAAGTCCCTGGGCA  
>CD13\_LsgRNA187  
GGGACTTGAAAATATAGAAGCCCTTGGCCA  
>CD13\_LsgRNA188  
CAGTCTTGTCAATGTGCGGGGGCTGGGAGC  
>CD13\_LsgRNA189  
TCACCTTTGGGAAGCATGTTGGACAGGGCT  
>CD13\_LsgRNA190  
TTCAGAAATAATACCAACAACCTGGAGGGAG  
>CD13\_LsgRNA191  
TCATGAACCGCTGGACCCTGCAGATGGGCT  
>CD13\_LsgRNA192  
ACCTGAACCTGTGGGACCACCTGCAGGAGG  
>CD13\_LsgRNA193  
ACAAGAACGCCAACAGCTCCCCCGTGGCCT  
>CD13\_LsgRNA194  
CATCGAAGCATGGGAAGGACTTCCGGGCAT  
>CD13\_LsgRNA195  
GCTTGAAGTAGCTCAGGCTGCTCAGGGCGG  
>CD13\_LsgRNA196  
TCTGGAAGTGGGGTGTGTTGGACCTGGGCAG

>CD13\_LsgRNA197  
GTAGGAATCGGGTTTCAGCGTGTGGGGAG  
>CD13\_LsgRNA198  
GGTGAATGACCTGTGGCTGAACGAGGGCT  
>CD13\_LsgRNA199  
TGCTGAATGATGTGTACCGCGTGATGGCAG  
>CD13\_LsgRNA200  
TGGGGAATTTGCAGAAAGACCTCATGGTGC  
>CD13\_LsgRNA201  
GGGAGACACTCACGGGTTATTATTGGGGTT  
>CD13\_LsgRNA202  
GAGTGACAGGGACCTTATGGGCACTGGGAA  
>CD13\_LsgRNA203  
GTTGGACAGGGCTGTCAGGTCCCTGGGGTG  
>CD13\_LsgRNA204  
CAAGGACCCCCACTCACCTGATTTTGGGAG  
>CD13\_LsgRNA205  
GCTGGACCCTGCAGATGGGCTTCCCCGGTCA  
>CD13\_LsgRNA206  
GGCGGACGGGGTGGTGGAGGCCACGGGGGA  
>CD13\_LsgRNA207  
TGATGACGTCAGTGGCCTCCTTGCAGGTGA  
>CD13\_LsgRNA208  
GCCAGAGACCATCTCCTCACACTCTGGAAC  
>CD13\_LsgRNA209  
GTATGAGATGGACAGCGAGTTCGAGGGGGA  
>CD13\_LsgRNA210  
CCCCGAGATGGGGGTCTACCTGGTGGGCCA  
>CD13\_LsgRNA211  
CAAGGAGGAAGTGCTCCTGGGAAAGGTCC  
>CD13\_LsgRNA212  
CCAGGAGGATCCCCAGGATGCCAGGGACT  
>CD13\_LsgRNA213  
CCTTGAGGTGCACCACCAGGTACTCGGTGG  
>CD13\_LsgRNA214  
TCCAGAGTGTGAGGAGATGGTCTCTGGCCT  
>CD13\_LsgRNA215  
GGGGGAGTTGGCAGATGACCTGGCGGGCTT  
>CD13\_LsgRNA216  
GGTGGATAAGCGTGATGTTGAACTCGGCCT  
>CD13\_LsgRNA217  
GGGCGATAGCGTTGCAGTAGACGGTGGACC  
>CD13\_LsgRNA218  
TGCAGATGGGCTTCCCCGTCATCACGGTGG

>CD13\_LsgRNA219  
TAAGGATGGGGCCCGTCACGTTTCAGGGCAT  
>CD13\_LsgRNA220  
GGTAGATGGTGTCTGGTAGGCAAAGGTGT  
>CD13\_LsgRNA221  
GCGTGATGTTGAACTCGGCCTTCATGGCCG  
>CD13\_LsgRNA222  
CGGCGATTATGCCCTGAACGTGACGGGGCCC  
>CD13\_LsgRNA223  
GATGGCAGACAGCAGCAGGACTACTGGCTG  
>CD13\_LsgRNA224  
CCACGCAGGACCACCCTGTGCCCTGGCTG  
>CD13\_LsgRNA225  
AGAAGCAGGCATCCAATGGTGTCTTGGTAT  
>CD13\_LsgRNA226  
CCTTGCAGGTGAAACGGACGGTGCTGGAGC  
>CD13\_LsgRNA227  
TCCTGCAGGTGGTCCCACAGGTTTCAGGTAG  
>CD13\_LsgRNA228  
GGAAGCATGTTGGACAGGGCTGTCAGGTCC  
>CD13\_LsgRNA229  
GTCTGCCATCTCTGATGGATGTGATGGGCA  
>CD13\_LsgRNA230  
CCAGGCCCTGCTTGAATACGTCCTCGGACA  
>CD13\_LsgRNA231  
CCCAGCCTCATACCAAGACACCATTGGATG  
>CD13\_LsgRNA232  
CTTCGCCCTCTACGTGGAGTACCTGGGTGC  
>CD13\_LsgRNA233  
AGAAGCTCAACTACACCCTCAGCCAGGGGC  
>CD13\_LsgRNA234  
ACCAGCTCAGTCTTGTCAATGTCGGGGGGC  
>CD13\_LsgRNA235  
ACACGCTGAAACCCGATTCTTACCGGGTGA  
>CD13\_LsgRNA236  
TCAGGCTGCTCAGGGCGGCCTCCAGGGCA  
>CD13\_LsgRNA237  
TTCGGGAACCTGGTGACCATAGAGTGGTGG  
>CD13\_LsgRNA238  
GACAGGAAGCTGGAGAGCATCCTGAGGACT  
>CD13\_LsgRNA239  
TTCTGGAAGTGGGGTGCTGGGACCTGGGCA  
>CD13\_LsgRNA240  
GGTAGGAATCGGGTTTCAGCGTGTGGGGA

>CD13\_LsgRNA241  
TGTTGGACAGGGCTGTCAGGTCCTTGGGGT  
>CD13\_LsgRNA242  
AGGAGGACAGGGGTTCGAACAGCAGGGAGT  
>CD13\_LsgRNA243  
AGGCGGACGGGGTGGTGGAGGCCACGGGGG  
>CD13\_LsgRNA244  
CCGAGGACGTATTCAAGCAGGGCCTGGCGG  
>CD13\_LsgRNA245  
AGCTGGAGAGCATCCTGAGGACTGAGGCGC  
>CD13\_LsgRNA246  
GGAGGGAGATCCCAGAAAACCTGATGGACC  
>CD13\_LsgRNA247  
TCAAGGAGGAAGTGCTCCTGGGAAAGGGTC  
>CD13\_LsgRNA248  
CCCAGGAGGATCCCCAGGATGCCAGGGAC  
>CD13\_LsgRNA249  
TGGTGGAGGCCACGGGGGAGCTGTTGGCGT  
>CD13\_LsgRNA250  
AGGGGGAGTTGGCAGATGACCTGGCGGGCT  
>CD13\_LsgRNA251  
TTAAGGATGGGGCCCGTCACGTTTCAGGGCA  
>CD13\_LsgRNA252  
CGCAGGCAGGGCCCACTCACCTTTGGGAAG  
>CD13\_LsgRNA253  
CCTGGGCATCCTGGGGATCCTCCTGGGCGT  
>CD13\_LsgRNA254  
TCTAGGCCATCCCTGTCATCAATCGGGCAC  
>CD13\_LsgRNA255  
TACAGGCCCTGTCATTGGGGGTGAGGTAC  
>CD13\_LsgRNA256  
TCTGGGCCCGGCCAGTGCCATTGCGGCGG  
>CD13\_LsgRNA257  
TGGTGGCCGAGGCGGGTTGGTGGTGGCTG  
>CD13\_LsgRNA258  
CCTGGGCGATAGCGTTGCAGTAGACGGTGG  
>CD13\_LsgRNA259  
CCGAGGCGGGGTGGTGGTGGCTGAGGCGG  
>CD13\_LsgRNA260  
GAGGGGCGGGTAACATTGGAATCGGGGTCA  
>CD13\_LsgRNA261  
GGCCGGCGTGTTGATCTCCGAGGCGGGTGT  
>CD13\_LsgRNA262  
TGTTGGCGTTCCTGTTCTTCTCCTGGGAGT

>CD13\_LsgRNA263  
TGGTGGCTGAGGCGGACGGGGTGGTGGAGG  
>CD13\_LsgRNA264  
GGCTGGCTGCTACTGACCTCCTGCAGGTGG  
>CD13\_LsgRNA265  
GGCTGGGAGCCTCCCACACCACGCAGGACC  
>CD13\_LsgRNA266  
CCAGGGGCACAGGGTGGTCTCGTGGTGT  
>CD13\_LsgRNA267  
CCCTGGGCATCCTGGGGATCCTCCTGGGCG  
>CD13\_LsgRNA268  
TGAGGGGCGGGTAACATTGGAATCGGGGTC  
>CD13\_LsgRNA269  
GACAGGGCTGTCAGGTCCTTGGGGTGGATA  
>CD13\_LsgRNA270  
CTGAGGGGCGGGTAACATTGGAATCGGGGT  
>CD13\_LsgRNA271  
TCGAGGGGGAGTTGGCAGATGACCTGGCGG  
>CD13\_LsgRNA272  
AAGAGGGGTGTGACCTGCTTCTTCAGGTAG  
>CD13\_LsgRNA273  
AGGCGGGGTTGGTGGTGGCTGAGGCGGACG  
>CD13\_LsgRNA274  
AGGCGGTTGTGGACAGCGGGTGGGAGGAGG  
>CD13\_LsgRNA275  
TCGGGGTCAAGGAGGAAGTGCTCCTGGGAA  
>CD13\_LsgRNA276  
TGGTGGTGCACCTCAAGGGCTCCCTGGTGA  
>CD13\_LsgRNA277  
AGCTGGTGGAGCCCACCGAGTACCTGGTGG  
>CD13\_LsgRNA278  
GGGTGGTGGCCACTACACAGATGCAGGCTG  
>CD13\_LsgRNA279  
AGGTGGTGGCCGAGGCGGGGTTGGTGGTGG  
>CD13\_LsgRNA280  
TGGTGGTGGCTGAGGCGGACGGGGTGGTGG  
>CD13\_LsgRNA281  
CCAAGGTGGTGGCCGAGGCGGGGTTGGTGG  
>CD13\_LsgRNA282  
GGTTGGTGGTGGCTGAGGCGGACGGGGTGG  
>CD13\_LsgRNA283  
CACAGGTTGAGGTAGATGGTGTCTGGTGG  
>CD13\_LsgRNA284  
AAACGTACAGGCCCTGTCATTGGGGTGA

>CD13\_LsgRNA285  
GACCGTACCTCACCCCAATGACAGGGGCC  
>CD13\_LsgRNA286  
TGGAGTACCTGGGTGCTGACTATGCGGAGC  
>CD13\_LsgRNA287  
CCGAGTACCTGGTGGTGCACCTCAAGGGCT  
>CD13\_LsgRNA288  
TCTGGTAGGCAAAGGTGTGGAGGTAGGACT  
>CD13\_LsgRNA289  
TGGCGTCAAACAGCTCACTGATCTGGGCCG  
>CD13\_LsgRNA290  
CGGGGTCAAGGAGGAAGTGCTCCTGGGAAA  
>CD13\_LsgRNA291  
TTTGGTCCAAGGTGGTGGCCGAGGCGGGGT  
>CD13\_LsgRNA292  
GGTGGTCCCACAGGTTTCAGGTAGATGGTGT  
>CD13\_LsgRNA293  
TCCTGTCCGAGGACGTATTCAAGCAGGGCC  
>CD13\_LsgRNA294  
CCCTGTCCTCCTCCAGCAGCAACAAGGAGC  
>CD13\_LsgRNA295  
TACTGTCTCTCTTCAATCAGGAAGAGGGTG  
>CD13\_LsgRNA296  
TGGGGTCTTCTGGAAGTGGGGTGCTGGGAC  
>CD13\_LsgRNA297  
TGAGGTGCACCACCAGGTACTCGGTGGGCT  
>CD13\_LsgRNA298  
TGCTGTGGATGATGATGACGTCAGTGGCCT  
>CD13\_LsgRNA299  
CGCCGTGGCCCGCCGAATGGCACTGGGCC  
>CD13\_LsgRNA300  
CAGGGTGGTCCTGCGTGGTGTGGGAGGCTC  
>CD13\_LsgRNA301  
GTGAGTTCGACTACGTGGAGAAGCAGGCAT  
>CD13\_LsgRNA302  
GCGTGTGATCTCCGAGGCGGGTGTGGACA  
>CD13\_LsgRNA303  
CCTTGTGCTGCTGGAGGAGGACAGGGGGT  
>CD13\_LsgRNA304  
TCCAGTTGGGGTCTTCTGGAAGTGGGGTGC  
>CD13\_LsgRNA305  
CTCTGTTTATTTCCAGTGCCCATTAAGGTCC  
>CD13\_LsgRNA306  
TCGGGTTTCAGCGTGTGGGGAGGCGGTAA



>CD13\_LsgRNA307  
CGGGTAACATTGGAATCGGGGTCAAGGAGG  
>CD13\_LsgRNA308  
CTTCTACCGCAGCGAGTACATGGAGGGCAA  
>CD13\_LsgRNA309  
ACCGTACCTCACCCCAATGACAGGGGCCT  
>CD13\_LsgRNA310  
CGAGTACCTGGTGGTGCACCTCAAGGGCTC  
>CD13\_LsgRNA311  
TGAATACGTCCTCGGACAGGAAGCTGGAGA  
>CD13\_LsgRNA312  
CGTCTACTGCAACGCTATCGCCCAGGGCGG  
>CD13\_LsgRNA313  
GGACTACTGGCTGATAGATGTAAGAGGTAA  
>CD13\_LsgRNA314  
GCAGTAGACGGTGGACCGCAGGTTGGGGTG  
>CD13\_LsgRNA315  
ACGCTATCGCCCAGGGCGGGGAGGAGGAGT  
>CD13\_LsgRNA316  
GTATTATTTCTGAAGTGAATGAAGAGGGGT  
>CD13\_LsgRNA317  
AACCTCAATGTGACGGGCTATTACCGGGTG  
>CD13\_LsgRNA318  
CTGCTCACTTGAATTCTGAGGGGCGGGTAA  
>CD13\_LsgRNA319  
CACTTCAGAAATAATACCAACAACCTGGAGG  
>CD13\_LsgRNA320  
TTGGTCCAAGGTGGTGGCCGAGGCGGGGTT  
>CD13\_LsgRNA321  
TATTTCCAAGTCCCTGGGCATCCTGGGGAT  
>CD13\_LsgRNA322  
TCATTCCACCACTCTATGGTCACCAGGTTC  
>CD13\_LsgRNA323  
CCAGTCCCAGTTCTCCATGGCGCCGGCGT  
>CD13\_LsgRNA324  
CCTGTCCGAGGACGTATTCAAGCAGGGCCT  
>CD13\_LsgRNA325  
GGGTTCTCCATCCACTGCTTGAAAAGGCCA  
>CD13\_LsgRNA326  
CCCATCTGCTCACTTGAATTCTGAGGGGCG  
>CD13\_LsgRNA327  
GAAGTCTGGCAGGCCAATCTGGTCTGGGGA  
>CD13\_LsgRNA328  
GTGTTCTGGTAGGCAAAGGTGTGGAGGTAG

>CD13\_LsgRNA329  
GGGGTCTTCTGGAAGTGGGGTGCTGGGACC  
>CD13\_LsgRNA330  
TCAGTCTTGTCAATGTCTGGGGGGCTGGGAG  
>CD13\_LsgRNA331  
TGGATCTTTAATTGCAGCTACGTGTGGATT  
>CD13\_LsgRNA332  
CGGGTGAAC TACGACGAAGAGAACTGGAGG  
>CD13\_LsgRNA333  
AGCTTGAAGTAGCTCAGGCTGCTCAGGGCG  
>CD13\_LsgRNA334  
GCGTTGAAGTCTGGCAGGCCAATCTGGTCT  
>CD13\_LsgRNA335  
TGTTTGACGCCATCTCCTACAGCAAGGTGC  
>CD13\_LsgRNA336  
AGTATGAGATGGACAGCGAGTTCGAGGGGG  
>CD13\_LsgRNA337  
TGGCTGAGGCGGACGGGGTGGTGGAGGCCA  
>CD13\_LsgRNA338  
TTCATGATGTCCCGCACGGTGGTGGGGAGT  
>CD13\_LsgRNA339  
CTACTGCAACGCTATCGCCCAGGGCGGGGA  
>CD13\_LsgRNA340  
ATTGTGCACACGGCTGCCACGCCCAGGAGG  
>CD13\_LsgRNA341  
CATCTGCAGCCTGCATCTGTGTAGTGGCCA  
>CD13\_LsgRNA342  
GCGTTGCAGTAGACGGTGGACCGCAGGTTG  
>CD13\_LsgRNA343  
TCTGTGCCCGATTGATGACAGGGATGGCCT  
>CD13\_LsgRNA344  
ACATTGCCCTCCATGTACTCGCTGCGGTAG  
>CD13\_LsgRNA345  
ACTATGCGGAGCCCACCTGGAAC TTGGTAA  
>CD13\_LsgRNA346  
ACCGTGCGGGACATCATGAACCGCTGGACC  
>CD13\_LsgRNA347  
TGGCTGCTACTGACCTCCTGCAGGTGGTCC  
>CD13\_LsgRNA348  
TGATTGCTCATGAGCTGGCCCACCAGGTAG  
>CD13\_LsgRNA349  
TTGTTGCTGCTGGAGGAGGACAGGGGGTTCG  
>CD13\_LsgRNA350  
TACGTGGACATCTTGGGCGTGGTGTGGAAC

>CD13\_LsgRNA351  
GTGCTGGAGCCCTTAAAAACGTACAGGCC  
>CD13\_LsgRNA352  
GCCGTGGCCCGCCGCAATGGCACTGGGCCG  
>CD13\_LsgRNA353  
TCAGTGGCCTCCTTGCAGGTGAAACGGACG  
>CD13\_LsgRNA354  
CTGTTGGCGTTCTTGTCTTCTCCTGGGAG  
>CD13\_LsgRNA355  
TTTCTGGGATCTCCCTCCAGTTGTTGGTAT  
>CD13\_LsgRNA356  
ACGGTGGTGGGGAGTTGGATGGACCGTTG  
>CD13\_LsgRNA357  
GGGTTGGTGGTGGCTGAGGCGGACGGGGTG  
>CD13\_LsgRNA358  
GGCATGTACTGTCTCTCTTCAATCAGGAAG  
>CD13\_LsgRNA359  
AGGGTGTAGTTGAGCTTCTTGCTGTGGATG  
>CD13\_LsgRNA360  
TCATTGTCAGTGAGTTCGACTACGTGGAGA  
>CD13\_LsgRNA361  
CTGATGTGCTGAAGAGATCGTTCTGGGCTG  
>CD13\_LsgRNA362  
CGGGTGTGGACAGCGGGTGGGAGGAGCCA  
>CD13\_LsgRNA363  
ATGGTGTCTGGTAGGCAAAGGTGTGGAGG  
>CD13\_LsgRNA364  
TCCTTGTGCTGCTGGAGGAGGACAGGGGG  
>CD13\_LsgRNA365  
ATATTTCCAAGTCCCTGGGCATCCTGGGGA  
>CD13\_LsgRNA366  
AACCTTCCTGTTGGGGCAGGGTGGTGGCCA  
>CD13\_LsgRNA367  
GGGCTTCTATATTTCCAAGTCCCTGGGCAT  
>CD13\_LsgRNA368  
TGAATTCTGAGGGGCGGGTAACATTGGAAT  
>CD13\_LsgRNA369  
GATGTTGAACTCGGCCTTCATGGCCGGCTC  
>CD13\_LsgRNA370  
CTTGTGCTGCTGGAGGAGGACAGGGGGTC  
>CD13\_LsgRNA371  
TACTTTGGTCCAAGGTGGTGGCCGAGGCGG  
>CD13\_LsgRNA372  
GGGGTGGTGGTGGCTGAGGCGGACGGGGT

>CD13\_LsgRNA373  
 GGTGTTGTTTCAGCGCCAGAGTGACAGGGAC  
 >CD13\_LsgRNA374  
 ACGCTTTACTTTGGTCCAAGGTGGTGGCCG  
 >CD13\_LsgRNA375  
 ATTATTTCTGAAGTGAATGAAGAGGGGTGT  
 >CD13\_LsgRNA376  
 CATGTTTGACCGCTCCGAGGTCTATGGCCC  
 >CD13\_LsgRNA377  
 CACCTTTGGGAAGCATGTTGGACAGGGCTG

(19)  $S_2^-$ : 218 low on-target activity sgRNAs targeting CD15

>CD15\_LsgRNA1  
 GGAAAAGCAGGTACGAGGCCAGGGAGGAGG  
 >CD15\_LsgRNA2  
 TCGAAAGCCAGGTAGAACTTGTAGCGGGCC  
 >CD15\_LsgRNA3  
 GTTGAAGCGCAGCCGGCAGTCAGGGGGCGG  
 >CD15\_LsgRNA4  
 GTGGAAGTAGCGGCGATAGACCGCGGGGT  
 >CD15\_LsgRNA5  
 CCGAAATTGGGCTCCTGCACACAGTGGCCC  
 >CD15\_LsgRNA6  
 CCGAACACGTCCACGGTCACATGTTGGCTC  
 >CD15\_LsgRNA7  
 GGAAACAGGGGCTGGTGGCATGGGTGGTGA  
 >CD15\_LsgRNA8  
 TTCCACCACCGCGACCTCGTGAAGGGGCC  
 >CD15\_LsgRNA9  
 GGGCACCGTGGGGCTCGCCGACGGCGGGCGG  
 >CD15\_LsgRNA10  
 GGCGACCTCCAGCCCCAGGCCCCCGGGCCA  
 >CD15\_LsgRNA11  
 AGCCACTGGGACGAGCGCCAGGCCCCGGGTC  
 >CD15\_LsgRNA12  
 CGATAGACCGCGGGGTTGCGGTGAGGAAA  
 >CD15\_LsgRNA13  
 ACACAGACGGTCCATGGCAGCCCCGGCCT  
 >CD15\_LsgRNA14  
 CAGCAGCACGCCCACCGGTGCGGACGGGGT  
 >CD15\_LsgRNA15  
 CGAAAGCCAGGTAGAACTTGTAGCGGGCCA  
 >CD15\_LsgRNA16  
 ACCCAGCGCTGGCCCCGGGGCCTGGGGCTG

>CD15\_LsgRNA17  
AGGCAGCGGCGGCGGCAGAAAGCCCTGGCGA  
>CD15\_LsgRNA18  
CCGTAGGACGCGCGGTTCGGTGAGCAGGCGG  
>CD15\_LsgRNA19  
GTGCAGGAGCCCAATTTTCGGGCACCGGCTG  
>CD15\_LsgRNA20  
TACGAGGCCAGGGAGGAGGCACTTGGGAAG  
>CD15\_LsgRNA21  
GGCCAGGCCTGAGGGCGGGTCGCCGGGGTG  
>CD15\_LsgRNA22  
TGGAAGTAGCGGCGATAGACCGCGGGTTG  
>CD15\_LsgRNA23  
GGCCAGTCGGGGGGCCCTTCACGAGGTCG  
>CD15\_LsgRNA24  
GGACAGTGGCGGGGCCAGGCCTGAGGGCGG  
>CD15\_LsgRNA25  
CGGCAGTGTGCGCCTGGATGCCCCAGGGCG  
>CD15\_LsgRNA26  
TCGAAGTTCATCCAAACCCAGCGCTGGCCC  
>CD15\_LsgRNA27  
GTCCAGTTGAAGAGGTTACTTGCCAGGCTT  
>CD15\_LsgRNA28  
GTTTCATCCAAACCCAGCGCTGGCCCGGGG  
>CD15\_LsgRNA29  
TGCCATGGACCGTCTGTGTGCTGGCGGCCG  
>CD15\_LsgRNA30  
CCCAATTTTCGGGCACCGGCTGCCCCGGCCC  
>CD15\_LsgRNA31  
GGCACAAAGCGCTCGTAGTTGGCACGGTCT  
>CD15\_LsgRNA32  
GGCGCAACGCGTTGCTCGCTGGGGCGGTGC  
>CD15\_LsgRNA33  
TTTCCACCACCGCGACCTCGTGAAGGGGCC  
>CD15\_LsgRNA34  
AAGCCACCCCGGCGACCCGCCCTCAGGCCT  
>CD15\_LsgRNA35  
GCAGCACGCCACCGGTTCGCGACGGGGTTG  
>CD15\_LsgRNA36  
CCAACACGCGCAGATCCACCTCCTCGGCAG  
>CD15\_LsgRNA37  
CGTCCACGTGGATGAAGGCGCCGCGGGGCA  
>CD15\_LsgRNA38  
TGATCAGCGCCGTACACGTCAAGCCGGCGG

>CD15\_LsgRNA39  
AACCCAGCGCTGGCCCGGGGCTGGGGCT  
>CD15\_LsgRNA40  
TGGACAGCGTAGCTCCGGCGCCAGTGGAAG  
>CD15\_LsgRNA41  
GCGGCAGCTGCCCCAGCAAGCGTAGGTGA  
>CD15\_LsgRNA42  
GCCCCAGGCCCCCGGGCCAGCGCTGGGTTT  
>CD15\_LsgRNA43  
GGGCCAGGCCTGAGGGCGGGTCGCCGGGGT  
>CD15\_LsgRNA44  
GCCCCAGGCGGGGGCCAGTCGGGGGGCCC  
>CD15\_LsgRNA45  
AAAGCAGGTACGAGGCCAGGGAGGAGGCAC  
>CD15\_LsgRNA46  
TGGACAGTGGCGGGGCCAGGCCTGAGGGCG  
>CD15\_LsgRNA47  
GGGGCATCCAGGCGCACACTGCCGAGGAGG  
>CD15\_LsgRNA48  
CCAACATGTGACCGTGGACGTGTTCCGGCCG  
>CD15\_LsgRNA49  
TCATCAAACCCAGCGCTGGCCCGGGGGCC  
>CD15\_LsgRNA50  
AAACCAGCGCTGGCCCGGGGCTGGGGC  
>CD15\_LsgRNA51  
AGCCCCAGGCCCCCGGGCCAGCGCTGGGTT  
>CD15\_LsgRNA52  
GCATCCAGGCGCACACTGCCGAGGAGGTGG  
>CD15\_LsgRNA53  
TGCCCCAGGCGGGGGCCAGTCGGGGGGCC  
>CD15\_LsgRNA54  
CACGCCACCGGTCGCGACGGGGTTGGCGA  
>CD15\_LsgRNA55  
ATGCCCCAGGCGGGGGCCAGTCGGGGGGC  
>CD15\_LsgRNA56  
GATGCCCCAGGCGGGGGCCAGTCGGGGGG  
>CD15\_LsgRNA57  
GGGCCCCCGACTGGCCCCCGCCCTGGGGC  
>CD15\_LsgRNA58  
GGCCCCCGACTGGCCCCCGCCCTGGGGCA  
>CD15\_LsgRNA59  
GCCCCCGACTGGCCCCCGCCCTGGGGCAT  
>CD15\_LsgRNA60  
TGGCCCCGCCACTGTCCAGGAAACAGGGGC

>CD15\_LsgRNA61  
GAAGCCCTGGCGACCTCCAGCCCCAGGCC  
>CD15\_LsgRNA62  
TGCCCCGCGGCGCCTTCATCCACGTGGACG  
>CD15\_LsgRNA63  
GGCACCGGCTGCCCCGGCCCCGGCCG  
>CD15\_LsgRNA64  
TCGGCCGGGGCGGGCCGGGGCAGCCGGTGC  
>CD15\_LsgRNA65  
TCCACCTCCTCGGCAGTGTGCGCCTGGATG  
>CD15\_LsgRNA66  
ATCACCTCCTTCTGGGACGAGCCTTGGTGC  
>CD15\_LsgRNA67  
AGCCCCTGTTTCCTGGACAGTGGCGGGGCC  
>CD15\_LsgRNA68  
GGCCCCCTCACGAGGTCGCGGTGGTGAAA  
>CD15\_LsgRNA69  
TCGCCGACGGCGGCGGGCGGGCGGCGC  
>CD15\_LsgRNA70  
GTCCGACGGGGTTGGCGACCCCAGGGCA  
>CD15\_LsgRNA71  
TCGGCGAGCCCCACGGTGCCCCCATGGCGC  
>CD15\_LsgRNA72  
ACTTCGAGTCGCCCTCGCACTCCCCGGGGC  
>CD15\_LsgRNA73  
GAAGCGCAGCCGGCAGTCAGGGGGCGGCCT  
>CD15\_LsgRNA74  
GCGCCGCCCGCCCGCCGCGCCGTCGGCGA  
>CD15\_LsgRNA75  
GGCTCGCCGACGGCGGCGGGCGGGCGG  
>CD15\_LsgRNA76  
TCAGCGCCGTACACGTCAAGCCGGCGGCCG  
>CD15\_LsgRNA77  
TGTGCGCCTGGATGCCCCAGGGCGGGGGCC  
>CD15\_LsgRNA78  
TGTTTCGCGCCATGGGGGCACCGTGGGGCTC  
>CD15\_LsgRNA79  
GCGGCGGGGTGGCGCCGAGCCGGGGGCT  
>CD15\_LsgRNA80  
GCAACGCGTTGCGCCAGAGCTTCTCGGTGA  
>CD15\_LsgRNA81  
AAAGCGCTCGTAGTTGGCACGGTCTGGGCC  
>CD15\_LsgRNA82  
ACGGCGCTGATCACCTACGCTTGCTGGGGG

>CD15\_LsgRNA83  
CAGCCGCTGATGTTGAAGCGCAGCCGGCAG  
>CD15\_LsgRNA84  
CAGCCGGCAGTCAGGGGGCGGCCTCGGGGC  
>CD15\_LsgRNA85  
ACCCCGGCGACCCGCCCTCAGGCCTGGCCC  
>CD15\_LsgRNA86  
ACGGCGGCGGGCGGGCGGGCGGGCGGGTGG  
>CD15\_LsgRNA87  
GCGGCGGCGGGCGGGCGGGCGGGTGGCGC  
>CD15\_LsgRNA88  
CTGCCGGCTGCGCTTCAACATCAGCGGCTG  
>CD15\_LsgRNA89  
TCGCCGGGTGGCTTCTGGGGTAGAGGTAG  
>CD15\_LsgRNA90  
AGGGCGGGTCGCCGGGGTGGCTTCTGGGGT  
>CD15\_LsgRNA91  
TCCACGGTCACATGTTGGCTCAGTTGGTGG  
>CD15\_LsgRNA92  
GGCACGGTCTGGGCCAGCACCACCGGCAC  
>CD15\_LsgRNA93  
CGACCGGTGGGCGTGCTGCTGTGGTGGGAG  
>CD15\_LsgRNA94  
GGCTCGTCCCAGAAGGAGGTGATGTGGACA  
>CD15\_LsgRNA95  
TGGACGTGTTTCGGCCGGGGCGGGCCGGGGC  
>CD15\_LsgRNA96  
TGGACTACGAGGAGGCAGCGGCGGGCAG  
>CD15\_LsgRNA97  
CCTGCTCACCGACCGCGCTCCTACGGAGA  
>CD15\_LsgRNA98  
CGCACTCCCCGGGGCTGCGAAGCCTGGCAA  
>CD15\_LsgRNA99  
CTACCTTACCCAGAAGCCACCCGGCGA  
>CD15\_LsgRNA100  
AGGCCTGAGGGCGGGTCGCCGGGGTGGCTT  
>CD15\_LsgRNA101  
GGCGCTGATCACCTACGCTTGCTGGGGGCA  
>CD15\_LsgRNA102  
CGTGCTGCTGTGGTGGGAGCCCTTCGGGGG  
>CD15\_LsgRNA103  
TCAACTGGACGCTCTCCTACCGGGCGGACT  
>CD15\_LsgRNA104  
AGCGCTGGCCCGGGGCCTGGGGCTGGAGG



>CD15\_LsgRNA105  
GCTTCTGGGGTAGAGGTAGCCATAAGGCAC  
>CD15\_LsgRNA106  
TACGCTGTCCACATCACCTCCTTCTGGGAC  
>CD15\_LsgRNA107  
GCTGCTGTGGTGGGAGCCCTTCGGGGGGCG  
>CD15\_LsgRNA108  
GTTACTTGCCAGGCTTCGAGCCCCGGGGA  
>CD15\_LsgRNA109  
CGAGGAAAAGCAGGTACGAGGCCAGGGAGG  
>CD15\_LsgRNA110  
CCAGGAAACAGGGGCTGGTGGCATGGGTGG  
>CD15\_LsgRNA111  
TGTTGAAGCGCAGCCGGCAGTCAGGGGGCG  
>CD15\_LsgRNA112  
AGTGGAAGTAGCGGCGATAGACCGCGGGGT  
>CD15\_LsgRNA113  
TTGGGAAGTCGTCCACGTGGATGAAGGCGC  
>CD15\_LsgRNA114  
TCGCGACCGGTGGGCGTGCTGCTGTGGTGG  
>CD15\_LsgRNA115  
ATGTGACCGTGGACGTGTTTCGGCCGGGGCG  
>CD15\_LsgRNA116  
TGGCGACCTCCAGCCCCAGGCCCCGGGCC  
>CD15\_LsgRNA117  
TCGCGACGGGGTTGGCGACGCCAGGGCAG  
>CD15\_LsgRNA118  
CAAAGACGTCCGAGTCCGCCCGGTAGGAGA  
>CD15\_LsgRNA119  
TGGTGAGCCACTGGGACGAGCGCCAGGCCC  
>CD15\_LsgRNA120  
GTACGAGGCCAGGGAGGAGGCACTTGGGAA  
>CD15\_LsgRNA121  
CTTCGAGTCGCCCTCGCACTCCCCGGGGCT  
>CD15\_LsgRNA122  
AGCAGCACGCCACCGGTCGCGACGGGGTT  
>CD15\_LsgRNA123  
GGGGGCAGCTGCCGCCGCTGCCCTGGGCGT  
>CD15\_LsgRNA124  
GCCGGCAGTCAGGGGGCGCCCTCGGGGCGC  
>CD15\_LsgRNA125  
GGCCGCCAGCACACAGACGGTCCATGGCAG  
>CD15\_LsgRNA126  
GGCTGCCATGGACCGTCTGTGTGCTGGCGG

>CD15\_LsgRNA127  
GGATGCCCCAGGGCGGGGGCCAGTCGGGGG  
>CD15\_LsgRNA128  
ACTGGCCCCCGCCCTGGGGCATCCAGGCGC  
>CD15\_LsgRNA129  
GCTGGCCCCGGGGCCTGGGGCTGGAGGTTCG  
>CD15\_LsgRNA130  
TGGCGCCGAGGCCGGGGGCTGCCATGGACC  
>CD15\_LsgRNA131  
CGCCGCCCGCGTCGGCGAGCCCCACGGTGC  
>CD15\_LsgRNA132  
GTGCGCCTGGATGCCCCAGGGCGGGGGCCA  
>CD15\_LsgRNA133  
TCAGGCCTGGCCCCGCCACTGTCCAGGAAA  
>CD15\_LsgRNA134  
GGGGGCCTGGGGCTGGAGGTCCAGGGCT  
>CD15\_LsgRNA135  
TCTGGCGCAACGCGTTGCTCGCTGGGGCGG  
>CD15\_LsgRNA136  
GTGTGCGCCTGGATGCCCCAGGGCGGGGGC  
>CD15\_LsgRNA137  
GGCGGCGCGGTTGGCGCCGAGCCGGGGGC  
>CD15\_LsgRNA138  
ATCTGCGCGTGTGGACTACGAGGAGGCAG  
>CD15\_LsgRNA139  
CGGGGCGCTATCGCGCCCCCGAAGGGCTC  
>CD15\_LsgRNA140  
GACGGCGGCGGCGGGCGGGCGGCGGGGTG  
>CD15\_LsgRNA141  
CGGCGCGGTTGGCGCCGAGCCGGGGGCTG  
>CD15\_LsgRNA142  
CGTTGCTCGCTGGGGCGGTGCCGGTGGTGC  
>CD15\_LsgRNA143  
AAGCGCTCGTAGTTGGCACGGTCTGGGCCC  
>CD15\_LsgRNA144  
GGACGCTCTCCTACCGGGCGGACTCGGACG  
>CD15\_LsgRNA145  
CGGCGCTGATCACCTACGCTTGCTGGGGGC  
>CD15\_LsgRNA146  
CAGCGCTGCCTGTTTCGCGCCATGGGGGCAC  
>CD15\_LsgRNA147  
AGGTGCTGCGAGTTCTCGAAAGCCAGGTAG  
>CD15\_LsgRNA148  
CAGAGCTTCTCGGTGATATAATCCAGGTGC

>CD15\_LsgRNA149  
TCGAGGAAAAGCAGGTACGAGGCCAGGGAG  
>CD15\_LsgRNA150  
TCCAGGAAACAGGGGCTGGTGGCATGGGTG  
>CD15\_LsgRNA151  
TGTTGGACTACGAGGAGGCAGCGGCGGCGG  
>CD15\_LsgRNA152  
CCGAGGAGGTGGATCTGCGCGTGTGGACT  
>CD15\_LsgRNA153  
TGGGGGCACCGTGGGGCTCGCCGACGGCGG  
>CD15\_LsgRNA154  
CCGGGGCAGCCGGTGCCCGAAATTGGGCTC  
>CD15\_LsgRNA155  
TGGGGGCAGCTGCCGCGCTGCCCTGGGCG  
>CD15\_LsgRNA156  
AGCCGGCAGTCAGGGGGCGGCTCGGGGCG  
>CD15\_LsgRNA157  
CAGTGGCCCGCTACAAGTTCTACCTGGCTT  
>CD15\_LsgRNA158  
TGGCGGCCGCGGCTTGACGTGTACGGCGC  
>CD15\_LsgRNA159  
GCCAGGCCTGAGGGCGGGTCGCCGGGTGG  
>CD15\_LsgRNA160  
GGTTGGCGACGCCAGGGCAGCGGCGGCAG  
>CD15\_LsgRNA161  
TAGCGGCGATAGACCGGGGTTGCGGTCCG  
>CD15\_LsgRNA162  
CTCTGGCGCAACGCGTTGCTCGCTGGGGCG  
>CD15\_LsgRNA163  
TCCAGGCGCACACTGCCGAGGAGGTGGATC  
>CD15\_LsgRNA164  
GGGCGGCGCGGTGGCGCCGAGCCGGGGG  
>CD15\_LsgRNA165  
TCGGGGCGCTATCGCGCCCCCGAAGGGCT  
>CD15\_LsgRNA166  
AGCCGGCGGCCCGCCAGCACACAGACGGTCC  
>CD15\_LsgRNA167  
CAGTGGCGGGGCCAGGCCTGAGGGCGGGTC  
>CD15\_LsgRNA168  
TGTTGGCTCAGTTGGTGGTAGTAGCGGACC  
>CD15\_LsgRNA169  
GTGGGGCTCGCCGACGGCGGCGGCGGCGG  
>CD15\_LsgRNA170  
CGCGGGGCACAAAGCGCTCGTAGTTGGCAC

>CD15\_LsgRNA171  
GCCGGGGCAGCCGGTGCCCGAAATTGGGCT  
>CD15\_LsgRNA172  
GGGCGGGCGGCGGGGTGGCGCCGAGGCCG  
>CD15\_LsgRNA173  
CGTGGGGCTCGCCGACGGCGGGCGGGCG  
>CD15\_LsgRNA174  
CGCTGGGGCGGTGCCGGTGGTGCTGGGCCC  
>CD15\_LsgRNA175  
TTCGGGGGCGCGATAGCGCCCCGAGGCCG  
>CD15\_LsgRNA176  
GGGCGGGTCGCCGGGTGGCTTCTGGGGTA  
>CD15\_LsgRNA177  
TGGTGGTAGTAGCGGACCCGGGCCTGGCGC  
>CD15\_LsgRNA178  
GGCGGGTCGCCGGGTGGCTTCTGGGGTAG  
>CD15\_LsgRNA179  
CACTGTCCAGGAAACAGGGGCTGGTGGCAT  
>CD15\_LsgRNA180  
GGGCGTCGCAACCCCGTCGCGACCGGTGG  
>CD15\_LsgRNA181  
GACCGTCTGTGTGCTGGCGGCCCGGCTT  
>CD15\_LsgRNA182  
GACCGTGGACGTGTTCCGGCCGGGCGGGCC  
>CD15\_LsgRNA183  
CACCGTGGGGCTCGCCGACGGCGGGCGGCG  
>CD15\_LsgRNA184  
CACTGTGTGCAGGAGCCCAATTTTCGGGCAC  
>CD15\_LsgRNA185  
GGACGTGTTTCGGCCGGGGCGGGCCGGGGCA  
>CD15\_LsgRNA186  
ACGCGTTGCTCGCTGGGGCGGTGCCGGTGG  
>CD15\_LsgRNA187  
GCGTGTGGACTACGAGGAGGCAGCGGCGG  
>CD15\_LsgRNA188  
CGGGGTTGGCGACGCCAGGGCAGCGGCGG  
>CD15\_LsgRNA189  
TTCATCCAAACCCAGCGCTGGCCCCGGGGG  
>CD15\_LsgRNA190  
ACGGTCCATGGCAGCCCCCGGCCTCGGCGC  
>CD15\_LsgRNA191  
TGTTTCCTGGACAGTGGCGGGGCCAGGCCT  
>CD15\_LsgRNA192  
GGGCTCGCCGACGGCGGGCGGGCGGGCG

>CD15\_LsgRNA193  
CTGTTTCGCGCCATGGGGGCACCGTGGGGCT  
>CD15\_LsgRNA194  
GGACTCGGACGTCTTTGTGCCTTATGGCTA  
>CD15\_LsgRNA195  
GACCTCGTGAAGGGGCCCGACTGGCCC  
>CD15\_LsgRNA196  
GCGGTCTATCGCCGCTACTTCCACTGGCGC  
>CD15\_LsgRNA197  
TGGATCTGCGCGTGTGGACTACGAGGAGG  
>CD15\_LsgRNA198  
ATGTTGAAGCGCAGCCGGCAGTCAGGGGGC  
>CD15\_LsgRNA199  
CATGTGACCGTGGACGTGTTCCGGCCGGGGC  
>CD15\_LsgRNA200  
GCGCTGATCACCTACGCTTGCTGGGGGCAG  
>CD15\_LsgRNA201  
CCCATGCCACCAGCCCCTGTTTCCTGGACA  
>CD15\_LsgRNA202  
AGTGTGCGCCTGGATGCCCCAGGGCGGGGG  
>CD15\_LsgRNA203  
GTGCTGCTGTGGTGGGAGCCCTTCGGGGGG  
>CD15\_LsgRNA204  
ACCGTGGACGTGTTCCGGCCGGGGCGGGCCG  
>CD15\_LsgRNA205  
AGCCTGGCAAGTAACCTCTTCAACTGGACG  
>CD15\_LsgRNA206  
CTGGTGGCATGGGTGGTGAGCCACTGGGAC  
>CD15\_LsgRNA207  
GCTCTGGCGCAACGCGTTGCTCGCTGGGGC  
>CD15\_LsgRNA208  
TCGCTGGGGCGGTGCCGGTGGTGCTGGGCC  
>CD15\_LsgRNA209  
ACGCTGTCCACATCACCTCCTTCTGGGACG  
>CD15\_LsgRNA210  
CTGCTGTGGTGGGAGCCCTTCGGGGGGCGC  
>CD15\_LsgRNA211  
CCACTGTGTGCAGGAGCCCAATTCGGGGCA  
>CD15\_LsgRNA212  
GACGTGTTCCGGCCGGGGCGGGCCGGGGCAG  
>CD15\_LsgRNA213  
CCTGTTTCGCGCCATGGGGGCACCGTGGGGC  
>CD15\_LsgRNA214  
GATGTTGAAGCGCAGCCGGCAGTCAGGGGG

>CD15\_LsgRNA215  
TTACTTGCCAGGCTTCGCAGCCCCGGGGAG  
>CD15\_LsgRNA216  
TCAGTTGGTGGTAGTAGCGGACCCGGGCCT  
>CD15\_LsgRNA217  
TGCTTTTCCTCGACCGCAACCCCGCGGTCT  
>CD15\_LsgRNA218  
TGGCTTTCGAGAACTCGCAGCACCTGGATT

(20)  $S_3^-$ : 126 low on-target activity sgRNAs targeting CD33

>CD33\_LsgRNA1  
GAGGAAAGCAGCCAGGACAGCAGTGGGCAG  
>CD33\_LsgRNA2  
ATCCAAATTTCTGGCTGCAAGTGCAGGAGT  
>CD33\_LsgRNA3  
CAGGAATGACACCCACCCTACCACAGGGTC  
>CD33\_LsgRNA4  
GGAAACAAGAGACCAGAGCAGGAGTGGTTC  
>CD33\_LsgRNA5  
GCTCACAGGCCCAGGACACAGAGCAGGTCA  
>CD33\_LsgRNA6  
ACTTACAGGTGACGTTGAGCTGGATGGTTC  
>CD33\_LsgRNA7  
AGAGACCAGAGCAGGAGTGGTTCATGGGGC  
>CD33\_LsgRNA8  
AATCACCCACGGCCCCAGGACCACGGCAC  
>CD33\_LsgRNA9  
GAGCACCGAGGAGTGAGTAGTCCTGGGGCC  
>CD33\_LsgRNA10  
AAAAACCTGACCTGCTCTGTGTCTGGGCC  
>CD33\_LsgRNA11  
CCTGACCTGTCAGGTGAAGTTCGCTGGAGC  
>CD33\_LsgRNA12  
AAGAACTCCCCAGTTCATGGTTACTGGTTC  
>CD33\_LsgRNA13  
CAGCACTTACAGGTGACGTTGAGCTGGATG  
>CD33\_LsgRNA14  
AGCCAGAAATTTGGATCCATAGCCAGGGCC  
>CD33\_LsgRNA15  
ATCAAGAAGTACAGGAGGAGACTCAGGGCA  
>CD33\_LsgRNA16  
CCACAGGCCCAAATCCTCATCCCTGGCAC  
>CD33\_LsgRNA17  
GGGGAGGCTGACCCTGTGGTAGGGTGGGTG

>CD33\_LsgRNA18  
GCTCAGGGAGCAGTTGTTCTACTGGGATC  
>CD33\_LsgRNA19  
ACTCAGGGCAGATTCCGCCTCCTTGGGGAT  
>CD33\_LsgRNA20  
CAGCAGGGGCAGCAGTAGCAGCAGCGGCAT  
>CD33\_LsgRNA21  
GGTCAGGTTGGTGCCGTGGTCTTGGGGCCG  
>CD33\_LsgRNA22  
AGTGAGTAGTCCTGGGGCCCAGGGAGGTGG  
>CD33\_LsgRNA23  
GAGTAGTCCTGGGGCCCAGGGAGGTGGGGG  
>CD33\_LsgRNA24  
GAGGAGTGAGTAGTCCTGGGGCCCAGGGAG  
>CD33\_LsgRNA25  
CTAGAGTGCCAGGGATGAGGATTTTGGGCC  
>CD33\_LsgRNA26  
CCCCAGTTCATGGTTACTGGTTCCGGGAAG  
>CD33\_LsgRNA27  
AGGGATAATGGTTCATACTTCTTTCCGGATG  
>CD33\_LsgRNA28  
AGGAATGACACCCACCCTACCACAGGGTCA  
>CD33\_LsgRNA29  
GAAAAATGCTCACATGAAGAAGATGAGGCAG  
>CD33\_LsgRNA30  
TGTCATTCTGCCCCTGCTGTCTGGCTG  
>CD33\_LsgRNA31  
CAAACAAGCTAGATCAAGAAGTACAGGAGG  
>CD33\_LsgRNA32  
TGAGCACCGAGGAGTGAGTAGTCCTGGGGC  
>CD33\_LsgRNA33  
CACTCACCGGGGAGGCTGACCCGTGGGTAG  
>CD33\_LsgRNA34  
CAGCCACTCACCTGCCCACAGCAGGGGCAG  
>CD33\_LsgRNA35  
AGACCAGAGCAGGAGTGGTTCATGGGGCCA  
>CD33\_LsgRNA36  
AAAGCAGCCAGGACAGCAGTGGGCAGGAAT  
>CD33\_LsgRNA37  
TCCCCAGCTCTCTGTGCATGTGACAGGTGA  
>CD33\_LsgRNA38  
TGCTCAGGGAGCAGTTGTTCTACTGGGAT  
>CD33\_LsgRNA39  
GACTCAGGGCAGATTCCGCCTCCTTGGGGA

>CD33\_LsgRNA40  
CTGTCAGGTGAAGTTCGCTGGAGCTGGTGT  
>CD33\_LsgRNA41  
AGGTCAGGTTGGTGCCGTGGTCCTGGGGCC  
>CD33\_LsgRNA42  
TCCCCAGTTCATGGTTACTGGTTCCGGGAA  
>CD33\_LsgRNA43  
TGCTCATAATCACCCACGGCCCCAGGACC  
>CD33\_LsgRNA44  
TGAGCATCGTAGACGCCAGGAGGAGGATA  
>CD33\_LsgRNA45  
GGTTCATGGGGCCATTGGAGGAGCTGGTGT  
>CD33\_LsgRNA46  
AGTTCATGGTTACTGGTTCCGGGAAGGAGC  
>CD33\_LsgRNA47  
GAGACCAGAGCAGGAGTGGTTCATGGGGCC  
>CD33\_LsgRNA48  
TCTCCCATCAGAGTGAAGACCCACAGGAGG  
>CD33\_LsgRNA49  
AAGACCCACAGGAGGAAAGCAGCCAGGACA  
>CD33\_LsgRNA50  
CAGGCCCAGGACACAGAGCAGGTCAGGTTT  
>CD33\_LsgRNA51  
GTTTCCCACAGGGGCCCTGGCTATGGATC  
>CD33\_LsgRNA52  
TGGGCCCCAGGACTACTCACTCCTCGGTGC  
>CD33\_LsgRNA53  
GCTGCCCCCACCCTCCCTGGGCCCCAGGACT  
>CD33\_LsgRNA54  
TGCTCCCTGAGCATCGTAGACGCCAGGAGG  
>CD33\_LsgRNA55  
AGCACCGAGGAGTGAGTAGTCCTGGGGCCC  
>CD33\_LsgRNA56  
TTCTCCTCACTAGACTTGACCCACAGGCCC  
>CD33\_LsgRNA57  
AAAACCTGACCTGCTCTGTGTCCTGGGCCT  
>CD33\_LsgRNA58  
CTGTCTGGCTGCTTTCCTCCTGTGGGTCT  
>CD33\_LsgRNA59  
TAGTCCTGGGGCCCAGGGAGGTGGGGGCAG  
>CD33\_LsgRNA60  
CCAGCGAACTTCACCTGACAGGTCAGGTTG  
>CD33\_LsgRNA61  
AGTTCGCTGGAGCTGGTGTGACTACGGAGA



>CD33\_LsgRNA62  
TTCCCGGAACCAGTAACCATGAACTGGGGA  
>CD33\_LsgRNA63  
ACCACGGCACCAACCTGACCTGTCAGGTGA  
>CD33\_LsgRNA64  
AGATCGGGGGTGTTCCTGCTCACAGGCC  
>CD33\_LsgRNA65  
GCAGCTGACAACCAGGAGAAGATCGGGGGT  
>CD33\_LsgRNA66  
GCTACTGCTGCCCCTGCTGTGGGCAGGTGA  
>CD33\_LsgRNA67  
TCACCTGTCACATGCACAGAGAGCTGGGGA  
>CD33\_LsgRNA68  
CGAACTTCACCTGACAGGTCAGGTTGGTGC  
>CD33\_LsgRNA69  
GGAGGAAAGCAGCCAGGACAGCAGTGGGCA  
>CD33\_LsgRNA70  
GCCAGAAATTTGGATCCATAGCCAGGGCCC  
>CD33\_LsgRNA71  
CAGGGAACACCCCGATCTTCTCCTGGTTG  
>CD33\_LsgRNA72  
TCAAGAAGTACAGGAGGAGACTCAGGGCAG  
>CD33\_LsgRNA73  
CTACGACAAGAACTCCCCAGTTCATGGTTA  
>CD33\_LsgRNA74  
ACCTGACAGGTCAGGTTGGTGCCGTGGTCC  
>CD33\_LsgRNA75  
CGTAGACGCCAGGAGGAGGGATAATGGTTC  
>CD33\_LsgRNA76  
TGAGGCAGAGACAAAGAGCGAGCAGGGCTG  
>CD33\_LsgRNA77  
CACAGCCACTCACCTGCCACAGCAGGGGC  
>CD33\_LsgRNA78  
TTCCGCCTCCTTGGGGATCCCAGTAGGAAC  
>CD33\_LsgRNA79  
TGCTGCTACTGCTGCCCCTGCTGTGGGCAG  
>CD33\_LsgRNA80  
ACAAGCTAGATCAAGAAGTACAGGAGGAGA  
>CD33\_LsgRNA81  
GGCAGCTGACAACCAGGAGAAGATCGGGGG  
>CD33\_LsgRNA82  
TCCGGGAAGGAGCCATTATATCCAGGGACT  
>CD33\_LsgRNA83  
AGCAGGAGTGTTTCATGGGGCCATTGGAGG

>CD33\_LsgRNA84  
ATGAGGCAGAGACAAAGAGCGAGCAGGGCT  
>CD33\_LsgRNA85  
GGGAGGCTGACCCTGTGGTAGGGTGGGTGT  
>CD33\_LsgRNA86  
TGCAGGGAAACAAGAGACCAGAGCAGGAGT  
>CD33\_LsgRNA87  
TTCCGGGAAGGAGCCATTATATCCAGGGAC  
>CD33\_LsgRNA88  
GCTGGGGAGATTTGTAAGTGTATTTGGTAC  
>CD33\_LsgRNA89  
ACCGGGGAGGCTGACCCTGTGGTAGGGTGG  
>CD33\_LsgRNA90  
CTCAGGGCAGATTCCGCCTCCTTGGGGATC  
>CD33\_LsgRNA91  
CACCGGGGAGGCTGACCCTGTGGTAGGGTG  
>CD33\_LsgRNA92  
AACTGGGGAGTTCTTGTTCGTAGTAGGGTAT  
>CD33\_LsgRNA93  
GGGAGGTGGGGGCAGCTGACAACCAGGAGA  
>CD33\_LsgRNA94  
GGTTGTCAGCTGCCCCACCTCCCTGGGCC  
>CD33\_LsgRNA95  
AGTAGTCCTGGGGCCAGGGAGGTGGGGGC  
>CD33\_LsgRNA96  
AGGAGTGAGTAGTCCTGGGGCCAGGGAGG  
>CD33\_LsgRNA97  
GTTGGTGCCGTGGTCCTGGGGCCGTGGGGT  
>CD33\_LsgRNA98  
AGGAGTGGTTCATGGGGCCATTGGAGGAGC  
>CD33\_LsgRNA99  
CTCTGTGTCCTGGGCCTGTGAGCAGGGAAC  
>CD33\_LsgRNA100  
CCGGGTCTAGAGTGCCAGGGATGAGGATT  
>CD33\_LsgRNA101  
ACCCTACCACAGGGTCAGCCTCCCCGGTGA  
>CD33\_LsgRNA102  
TTCTACTGGGATCCCCAAGGAGGCGGAAT  
>CD33\_LsgRNA103  
TTCATACTTCTTTTCGGATGGAGAGAGGAAG  
>CD33\_LsgRNA104  
GTTGTCAGCTGCCCCACCTCCCTGGGCC  
>CD33\_LsgRNA105  
CAGGTCAGGTTGGTGCCGTGGTCCTGGGGC

>CD33\_LsgRNA106  
CAGCTCCAGCGAACTTCACCTGACAGGTCA  
>CD33\_LsgRNA107  
TTGTTCTACTGGGATCCCCAAGGAGGCGG  
>CD33\_LsgRNA108  
GCTGTCTGGCTGCTTTCCTCCTGTGGGTC  
>CD33\_LsgRNA109  
GTAGTCCTGGGGCCAGGGAGGTGGGGGCA  
>CD33\_LsgRNA110  
TTGATCTAGCTTGTGTTGTGGCCACTGGAGA  
>CD33\_LsgRNA111  
AGTATGAACCATTATCCCTCCTCCTGGCGT  
>CD33\_LsgRNA112  
CTCCTGCACTTGCAGCCAGAAATTTGGATC  
>CD33\_LsgRNA113  
AGGATGCCCCATCACTCACCGGGGAGGCTG  
>CD33\_LsgRNA114  
TTGGTGCCGTGGTCCTGGGGCCGTGGGGTG  
>CD33\_LsgRNA115  
CTGCTGCTACTGCTGCCCCTGCTGTGGGCA  
>CD33\_LsgRNA116  
CCACTGGAGAGTCCCTGGATATAATGGCTC  
>CD33\_LsgRNA117  
TCCCTGGATATAATGGCTCCTTCCCGAAC  
>CD33\_LsgRNA118  
GGAGTGGCCGGTTCTAGAGTGCCAGGGAT  
>CD33\_LsgRNA119  
GCCCTGGCTATGGATCCAAATTTCTGGCTG  
>CD33\_LsgRNA120  
GAACTGGGGAGTTCTTGTCTAGTAGGGTA  
>CD33\_LsgRNA121  
ATAATGGTTCATACTTCTTTCGGATGGAGA  
>CD33\_LsgRNA122  
GGGCTGTAACACCAGCTCCTCCAATGGCCC  
>CD33\_LsgRNA123  
GCTCTGTGTCCTGGGCCTGTGAGCAGGGAA  
>CD33\_LsgRNA124  
GGGGTGTTCCTGCTCACAGGCCAGGACA  
>CD33\_LsgRNA125  
GTA CT TCTTGATCTAGCTTGTGTTGTGGCCA  
>CD33\_LsgRNA126  
GGAGTTCTTGTCTAGTAGGGTATGGGATG

(21)  $S_4^-$ : 119 low on-target activity sgRNAs targeting CCDC101

>CCDC101\_LsgRNA1  
TGAGAAGTTCTGCAATGCGGGAATCGGCAG  
>CCDC101\_LsgRNA2  
CCCCACAGCCCCAGGATGACTACTCGGTCC  
>CCDC101\_LsgRNA3  
TCAAACAGGACCGAGTAGTCATCCTGGGGC  
>CCDC101\_LsgRNA4  
ACTCACAGGCCCCACCCCTCTGTGGGGCC  
>CCDC101\_LsgRNA5  
GTGAACATCCAGAAGACCCATGAGCGGATG  
>CCDC101\_LsgRNA6  
TGTCACCAGGCTTCCCGATCCACAGGGGCA  
>CCDC101\_LsgRNA7  
GGCCACGCAGCTTTGTCCGGTAATAGGGAG  
>CCDC101\_LsgRNA8  
TTCCACTGGGGCAGCGGGATGACACGGCGC  
>CCDC101\_LsgRNA9  
GTGTAGAGGCCACGCAGCTTTGTCCGGTAA  
>CCDC101\_LsgRNA10  
TAGAAGCAGGTAGTCTGGGGATACAGGGCC  
>CCDC101\_LsgRNA11  
GGGCAGCCACCTTGTCTCCAGGTCTGGCCA  
>CCDC101\_LsgRNA12  
GGGGAGGGGAATAGCCATCTGCATAGGAGG  
>CCDC101\_LsgRNA13  
GGCCATGACCCTGCCCTGTGGATCGGGAA  
>CCDC101\_LsgRNA14  
AGGGATGGCCCCACAGAGGGGTGGGGGCCT  
>CCDC101\_LsgRNA15  
AGTCATTGTAGAGACCGGCAATCTTGGCCG  
>CCDC101\_LsgRNA16  
GAGACAAGGTGGCTGCCCGGGTGAAGGCCG  
>CCDC101\_LsgRNA17  
CCCTCAATGTGGCTCAGAGATACGTGGTGG  
>CCDC101\_LsgRNA18  
TTGTCACCAGGCTTCCCGATCCACAGGGGC  
>CCDC101\_LsgRNA19  
CTCACAGGCCCCACCCCTCTGTGGGGCCA  
>CCDC101\_LsgRNA20  
TCTGCATAGGAGGTGTCTTCAAACAGGACC  
>CCDC101\_LsgRNA21  
GGGTCATCAGCACCCCTCTGCGCATGGTCT  
>CCDC101\_LsgRNA22  
CTGGCCACGTAGTCTCCTGAGGCAGGGATG

>CCDC101\_LsgRNA23  
GGATCCACTGCTCGTCCCCATCCACGGCCT  
>CCDC101\_LsgRNA24  
AGGGCCAGCACGAGCTGCTCCTTCTGGAAC  
>CCDC101\_LsgRNA25  
TCCCCCAGGAGACACACCCTGAGCCGGCGC  
>CCDC101\_LsgRNA26  
CCTTCCCACAGCGGCCAAGATTGCCGGTCT  
>CCDC101\_LsgRNA27  
CGTCCCCATCCACGGCCTTCACCCGGGCAG  
>CCDC101\_LsgRNA28  
TCGTCCCCATCCACGGCCTTCACCCGGGCA  
>CCDC101\_LsgRNA29  
GCCACCCCGGAAGACCATGCGCAGAGGGGT  
>CCDC101\_LsgRNA30  
AGCACCCCTCTGCGCATGGTCTTCCGGGGT  
>CCDC101\_LsgRNA31  
CCTGCCCTGTGGATCGGGAAGCCTGGTGA  
>CCDC101\_LsgRNA32  
CCACCCCGGAAGACCATGCGCAGAGGGGTG  
>CCDC101\_LsgRNA33  
GCTGCCCGGGTGAAGGCCGTGGATGGGGAC  
>CCDC101\_LsgRNA34  
GCACCCCTCTGCGCATGGTCTTCCGGGGTG  
>CCDC101\_LsgRNA35  
CGGACCCCTGAGGCCTTGTTCCAGAAGGAGC  
>CCDC101\_LsgRNA36  
CCATCCCTGCCTCAGGAGACTACGTGGCCA  
>CCDC101\_LsgRNA37  
GGCGCCGGCTCAGGGTGTGTCTCCTGGGGG  
>CCDC101\_LsgRNA38  
CTGCCCGGGTGAAGGCCGTGGATGGGGACG  
>CCDC101\_LsgRNA39  
AAGGCCGTGGATGGGGACGAGCAGTGGATC  
>CCDC101\_LsgRNA40  
CACCCCTCTGCGCATGGTCTTCCGGGGTGG  
>CCDC101\_LsgRNA41  
TTTTCTTACAGGAAGAGCGTTCGCGGAGC  
>CCDC101\_LsgRNA42  
TGCTCCTTCTGGAACAAGGCCTCAGGGTCC  
>CCDC101\_LsgRNA43  
GGGACGAGCAGTGGATCCTGGCCGAGGTGG  
>CCDC101\_LsgRNA44  
GCCACGCAGCTTTGTCCGGTAATAGGGAGA

>CCDC101\_LsgRNA45  
AGATCGCGGAAATCAAGTCTCTGTTGGAAG  
>CCDC101\_LsgRNA46  
AGGGCGCGGTAGAAGCAGGTAGTCTGGGGA  
>CCDC101\_LsgRNA47  
CAGTCGGCCATGACCCTGCCCTGTGGATC  
>CCDC101\_LsgRNA48  
GCATCGGCCTTGGCGGTTGTGTAGAGGCCA  
>CCDC101\_LsgRNA49  
GCGCCGGCTCAGGGTGTGTCTCCTGGGGGA  
>CCDC101\_LsgRNA50  
CACCCGGCAGCCACCTTGTCTCCAGGTCT  
>CCDC101\_LsgRNA51  
ACCACGTATCTCTGAGCCACATTGAGGGGA  
>CCDC101\_LsgRNA52  
ACTACGTGGCCAGACCTGGAGACAAGGTGG  
>CCDC101\_LsgRNA53  
TGCACTCAGCCTCTGCATCGGCCTTGGCGG  
>CCDC101\_LsgRNA54  
CCGTCTCCGGGTTGGCCTTCCACTGGGGCA  
>CCDC101\_LsgRNA55  
GTATCTCTGAGCCACATTGAGGGGAGGGGA  
>CCDC101\_LsgRNA56  
TGTTCTCTGTCTGCATCCGCTCATGGGTCT  
>CCDC101\_LsgRNA57  
TCCTCTGCAGTTTCTCCCTATTACCGGACA  
>CCDC101\_LsgRNA58  
CCCTCTGCGCATGGTCTTCCGGGGTGGCTC  
>CCDC101\_LsgRNA59  
AGACCTGGAGACAAGGTGGCTGCCCGGGTG  
>CCDC101\_LsgRNA60  
AGCTCTGTGAGAAGTTCTGCAATGCGGGAA  
>CCDC101\_LsgRNA61  
GTCTCTGTTGGAAGAGAGCGGATTGGTGA  
>CCDC101\_LsgRNA62  
CAGGCTTCCCGATCCACAGGGGCAGGGTCA  
>CCDC101\_LsgRNA63  
CTCACTTGCACTCAGCCTCTGCATCGGCCT  
>CCDC101\_LsgRNA64  
GTTTGAAGACACCTCCTATGCAGATGGCTA  
>CCDC101\_LsgRNA65  
CTCAGAGATACGTGGTGGCTTGTAAGGAAC  
>CCDC101\_LsgRNA66  
GCACGAGCTGCTCCTTCTGGAACAAGGCCT

>CCDC101\_LsgRNA67  
TCCCGATCCACAGGGGCAGGGTCATGGCCG  
>CCDC101\_LsgRNA68  
CCCTGATCCATGCGCCCCACAGCGGGTAA  
>CCDC101\_LsgRNA69  
GCGGGATGACACGGCGCCGGCTCAGGGTGT  
>CCDC101\_LsgRNA70  
TGCTGATGACCCTGCTGCAGCAGTCGGCCA  
>CCDC101\_LsgRNA71  
CAGGGATGGCCCCACAGAGGGGTGGGGGCC  
>CCDC101\_LsgRNA72  
TGGGGCAGCGGGATGACACGGCGCCGGCTC  
>CCDC101\_LsgRNA73  
TGAGGCAGGGATGGCCCCACAGAGGGTGG  
>CCDC101\_LsgRNA74  
GTCTGCATCCGCTCATGGGTCTTCTGGATG  
>CCDC101\_LsgRNA75  
TCTGGCCACGTAGTCTCCTGAGGCAGGGAT  
>CCDC101\_LsgRNA76  
CGCTGCCCCAGTGAAGGCCAACCCGGAGA  
>CCDC101\_LsgRNA77  
GGCTGCCCCGGGTGAAGGCCGTGGATGGGGA  
>CCDC101\_LsgRNA78  
CAATGCGGGAATCGGCAGACACGAGGGCCA  
>CCDC101\_LsgRNA79  
GGGCGCGGTAGAAGCAGGTAGTCTGGGGAT  
>CCDC101\_LsgRNA80  
ACCCGCTGTGGGGGCGCATGGATCAGGGCG  
>CCDC101\_LsgRNA81  
CCAGGCTTCCCGATCCACAGGGGCAGGGTC  
>CCDC101\_LsgRNA82  
GAGGGGAATAGCCATCTGCATAGGAGGTGT  
>CCDC101\_LsgRNA83  
CTCAGGAGACTACGTGGCCAGACCTGGAGA  
>CCDC101\_LsgRNA84  
CCCTGGAGGCTGCTTTACCCGCTGTGGGGG  
>CCDC101\_LsgRNA85  
CTGAGGCAGGGATGGCCCCACAGAGGGGTG  
>CCDC101\_LsgRNA86  
ACGTGGCCAGACCTGGAGACAAGGTGGCTG  
>CCDC101\_LsgRNA87  
AGGTGGCTGCCCGGGTGAAGGCCGTGGATG  
>CCDC101\_LsgRNA88  
GGCAGGGATGGCCCCACAGAGGGGTGGGGG

>CCDC101\_LsgRNA89  
TGTGGGGGCGCATGGATCAGGGCGCGGTAG  
>CCDC101\_LsgRNA90  
ACCTGGGTTTGTGGATCAGCTGATGGAGC  
>CCDC101\_LsgRNA91  
CCAGGGTTGGTGTCACTCACTTGTGGTGG  
>CCDC101\_LsgRNA92  
TGAGGTAGATGACATCGATGAAGAAGGCAA  
>CCDC101\_LsgRNA93  
CCACGTAGTCTCCTGAGGCAGGGATGGCCC  
>CCDC101\_LsgRNA94  
CCACGTATCTCTGAGCCACATTGAGGGGAG  
>CCDC101\_LsgRNA95  
CCCAGTGGAAGGCCAACCCGGAGACGGACC  
>CCDC101\_LsgRNA96  
CGCCGTGTCATCCCGCTGCCCCAGTGGAAG  
>CCDC101\_LsgRNA97  
CACGTATCTCTGAGCCACATTGAGGGGAGG  
>CCDC101\_LsgRNA98  
TCCCTATTACCGGACAAAGCTGCGTGGCCT  
>CCDC101\_LsgRNA99  
GAAATCAAGTCTCTGTTGGAAGAGAGGCGG  
>CCDC101\_LsgRNA100  
GGTGTCACTCACTTGTGGTGGCATGGCTG  
>CCDC101\_LsgRNA101  
AGGGTCATGGCCGACTGCTGCAGCAGGGTC  
>CCDC101\_LsgRNA102  
CTTCTCCCCGCCCTCAGCATCCTTCGGAAA  
>CCDC101\_LsgRNA103  
CTGCTCCTTCTGGAACAAGGCCTCAGGGTC  
>CCDC101\_LsgRNA104  
CCTGTCTGCCTGCCCCACAGCCCCAGGATG  
>CCDC101\_LsgRNA105  
GCCATGACCCTGCCCCTGTGGATCGGGAAG  
>CCDC101\_LsgRNA106  
GCCCTGATCCATGCGCCCCACAGCGGGTA  
>CCDC101\_LsgRNA107  
AGATTGCCGGTCTCTACAATGACTCGGAGC  
>CCDC101\_LsgRNA108  
GCAATGCGGGAATCGGCAGACACGAGGGCC  
>CCDC101\_LsgRNA109  
CAGCTGCTGCCCTCACTTGTCCACCAGGCTT  
>CCDC101\_LsgRNA110  
TGCGTGGCCTCTACACAACCGCCAAGGCCG



```

>CCDC101_LsgRNA111
GGGTTGGCCTTCCACTGGGGCAGCGGGATG
>CCDC101_LsgRNA112
TGGATGGGGACGAGCAGTGGATCCTGGCCG
>CCDC101_LsgRNA113
GGGTTGGTGTCACTCACTTGGTGGGCAT
>CCDC101_LsgRNA114
TGGCTGTAACTGACCACCTCGGCCAGGATC
>CCDC101_LsgRNA115
GCTCTGTGAGAAGTTCTGCAATGCGGGAAT
>CCDC101_LsgRNA116
TCAATGTGGCTCAGAGATACGTGGTGGCTT
>CCDC101_LsgRNA117
CCTCTGTGGGGCCATCCCTGCCTCAGGAGA
>CCDC101_LsgRNA118
TGCTTTACCCGCTGTGGGGGCGCATGGATC
>CCDC101_LsgRNA119
CGGGTTGGCCTTCCACTGGGGCAGCGGGAT

```

(22)  $S_5^-$ : 1478 low on-target activity sgRNAs targeting MED12

```

>MED12_LsgRNA1
GCCAAAAACCAGGGGCCGGTGCTGAGGGCA
>MED12_LsgRNA2
GCCAAAAACCAGGGGCCGGTGCTGAGGGCA
>MED12_LsgRNA3
TGAGAAACATAAGGAGTATAGCCCTGGAGG
>MED12_LsgRNA4
TGAGAAACATAAGGAGTATAGCCCTGGAGG
>MED12_LsgRNA5
CCAAAAACCAGGGGCCGGTGCTGAGGGCAC
>MED12_LsgRNA6
CCAAAAACCAGGGGCCGGTGCTGAGGGCAC
>MED12_LsgRNA7
TGTTAAAGGCTGCTGGGGAAGAATTGGAGA
>MED12_LsgRNA8
TGTTAAAGGCTGCTGGGGAAGAATTGGAGA
>MED12_LsgRNA9
CCGCAAAGGGACAGCAGAACTGGTGGGTT
>MED12_LsgRNA10
CCGCAAAGGGACAGCAGAACTGGTGGGTT
>MED12_LsgRNA11
GAGGAACAGAAGAACTTCCAGAGGAGGAGG
>MED12_LsgRNA12
CAGCAACAGACAGCAGCTTTGGTCCGGCAA

```

>MED12\_LsgRNA13  
CAGCAACAGACAGCAGCTTTGGTCCGGCAA  
>MED12\_LsgRNA14  
GGTCAACATGTCTCTTCTTAACCTTGGTCT  
>MED12\_LsgRNA15  
GGTCAACATGTCTCTTCTTAACCTTGGTCT  
>MED12\_LsgRNA16  
ATAGAACCAGGGTTTGGGTGGTGCAGGAGG  
>MED12\_LsgRNA17  
ATAGAACCAGGGTTTGGGTGGTGCAGGAGG  
>MED12\_LsgRNA18  
CTTCAACCCCTCAAAAAGATCCCAGGGCGA  
>MED12\_LsgRNA19  
TTCGAACGCACCTCCTTCTGTTTGGGGTCC  
>MED12\_LsgRNA20  
TTCGAACGCACCTCCTTCTGTTTGGGGTCC  
>MED12\_LsgRNA21  
CCTTAACTACAGGCAAGGCTCCATAGGCCT  
>MED12\_LsgRNA22  
CCTTAACTACAGGCAAGGCTCCATAGGCCT  
>MED12\_LsgRNA23  
GATGAACTGCACATGCTGCACCAGAGGCAA  
>MED12\_LsgRNA24  
GATGAACTGCACATGCTGCACCAGAGGCAA  
>MED12\_LsgRNA25  
TTTCAACTGTCCCCTCAGGTGGGGAGGATG  
>MED12\_LsgRNA26  
TTTCAACTGTCCCCTCAGGTGGGGAGGATG  
>MED12\_LsgRNA27  
TAGGAAGAGCTGGGAGTCATCTGATGGACA  
>MED12\_LsgRNA28  
TAGGAAGAGCTGGGAGTCATCTGATGGACA  
>MED12\_LsgRNA29  
GCTGAAGCCCCTGGCGCTGGAAGTGGGTGG  
>MED12\_LsgRNA30  
GCTGAAGCCCCTGGCGCTGGAAGTGGGTGG  
>MED12\_LsgRNA31  
AAGCAAGGATACAGCGCTCTGCAGAGGAGC  
>MED12\_LsgRNA32  
TGGTAAGGCTGGCTGGAGTAGCTGGGGGGC  
>MED12\_LsgRNA33  
TGGTAAGGCTGGCTGGAGTAGCTGGGGGGC  
>MED12\_LsgRNA34  
TTTCAATAACCAGCCTGCTGTCTCTGGGGA

>MED12\_LsgRNA35  
TTTCAATAACCAGCCTGCTGTCTCTGGGGA  
>MED12\_LsgRNA36  
TCCAAATATGTTGGTACTGGGCTGTGGCTG  
>MED12\_LsgRNA37  
TCCAAATATGTTGGTACTGGGCTGTGGCTG  
>MED12\_LsgRNA38  
AGAAAATCACCAAGGATATCTTGAAGGTTC  
>MED12\_LsgRNA39  
AGAAAATCACCAAGGATATCTTGAAGGTTC  
>MED12\_LsgRNA40  
CTGCAATCCCACATGAGAAACATAAGGAGT  
>MED12\_LsgRNA41  
CTGCAATCCCACATGAGAAACATAAGGAGT  
>MED12\_LsgRNA42  
ATGAAATCCCAGTGCCTTACCCGCAGGATC  
>MED12\_LsgRNA43  
ATGAAATCCCAGTGCCTTACCCGCAGGATC  
>MED12\_LsgRNA44  
CTCCAATGAGTGCCAGGGCGTCCAGGCAG  
>MED12\_LsgRNA45  
CTCCAATGAGTGCCAGGGCGTCCAGGCAG  
>MED12\_LsgRNA46  
GCAGACAAAGCTGTAGCGGTTAGCAGGGTT  
>MED12\_LsgRNA47  
GCAGACAAAGCTGTAGCGGTTAGCAGGGTT  
>MED12\_LsgRNA48  
AAGAACAATTTGGGGAGCTCTTCAGGTAA  
>MED12\_LsgRNA49  
AAGAACAATTTGGGGAGCTCTTCAGGTAA  
>MED12\_LsgRNA50  
GCCCACAACCATGACTGGCGTCATGGGTTT  
>MED12\_LsgRNA51  
GCCCACAACCATGACTGGCGTCATGGGTTT  
>MED12\_LsgRNA52  
ATCTACAAGAGTAGGATTGGTAGAAGGGTG  
>MED12\_LsgRNA53  
ATCTACAAGAGTAGGATTGGTAGAAGGGTG  
>MED12\_LsgRNA54  
TATAACACACCTTAACTACAGGCAAGGCTC  
>MED12\_LsgRNA55  
TATAACACACCTTAACTACAGGCAAGGCTC  
>MED12\_LsgRNA56  
GCAAACACGGCTCCATCCACGATGCGGTTC

>MED12\_LsgRNA57  
GTACACAGAGGTCTTATAAGAGGAGGGTTC  
>MED12\_LsgRNA58  
GTACACAGAGGTCTTATAAGAGGAGGGTTC  
>MED12\_LsgRNA59  
TCACACAGGACTATGGAATGGGCCCGGGTC  
>MED12\_LsgRNA60  
TCACACAGGACTATGGAATGGGCCCGGGTC  
>MED12\_LsgRNA61  
AGAGACAGGCGGAGATTGAGGCTGAGGTTA  
>MED12\_LsgRNA62  
AGAGACAGGCGGAGATTGAGGCTGAGGTTA  
>MED12\_LsgRNA63  
AACCACAGGGGATGCGGAACTGAAAGGTTC  
>MED12\_LsgRNA64  
AACCACAGGGGATGCGGAACTGAAAGGTTC  
>MED12\_LsgRNA65  
TGACACATACCTGCAGTAGCTTCTGGCAT  
>MED12\_LsgRNA66  
TGACACATACCTGCAGTAGCTTCTGGCAT  
>MED12\_LsgRNA67  
ATCCACATCGACTGCTGGACAATGAGGATG  
>MED12\_LsgRNA68  
ATCCACATCGACTGCTGGACAATGAGGATG  
>MED12\_LsgRNA69  
GTAAACATCGGGAGGCCCCAGCCGCGGCCG  
>MED12\_LsgRNA70  
GTAAACATCGGGAGGCCCCAGCCGCGGCCG  
>MED12\_LsgRNA71  
CTCGACATCTGGCTTCTCAGGGGATGGACT  
>MED12\_LsgRNA72  
CTCGACATCTGGCTTCTCAGGGGATGGACT  
>MED12\_LsgRNA73  
TGGAACATGCCTCCTTCTTGAAGATGGAAT  
>MED12\_LsgRNA74  
TGGAACATGCCTCCTTCTTGAAGATGGAAT  
>MED12\_LsgRNA75  
TAACACATGTCCCTGGACTGAGGTGGGCAG  
>MED12\_LsgRNA76  
TAACACATGTCCCTGGACTGAGGTGGGCAG  
>MED12\_LsgRNA77  
AGGGACATGTGTTAAAGGCTGCTGGGGAAG  
>MED12\_LsgRNA78  
AGGGACATGTGTTAAAGGCTGCTGGGGAAG

>MED12\_LsgRNA79  
GCAAACCAAAGCAGCTTATGCATGAGGCAC  
>MED12\_LsgRNA80  
GCAAACCAAAGCAGCTTATGCATGAGGCAC  
>MED12\_LsgRNA81  
CGATACCAAGGGCAACAAGATTGCTGGCTT  
>MED12\_LsgRNA82  
CGATACCAAGGGCAACAAGATTGCTGGCTT  
>MED12\_LsgRNA83  
GTGAACCAAGTGTTAATGGCACTCTGGGAT  
>MED12\_LsgRNA84  
GTGAACCAAGTGTTAATGGCACTCTGGGAT  
>MED12\_LsgRNA85  
TGAAACCACAAGTGCCATTGTTAGAGGAGC  
>MED12\_LsgRNA86  
TGAAACCACAAGTGCCATTGTTAGAGGAGC  
>MED12\_LsgRNA87  
CTCTACCACACACACCTGAGGCCCGGCC  
>MED12\_LsgRNA88  
CTCTACCACACACACCTGAGGCCCGGCC  
>MED12\_LsgRNA89  
ATACACCAGAGCGCTCTAGAGAGCTGGAGA  
>MED12\_LsgRNA90  
ATACACCAGAGCGCTCTAGAGAGCTGGAGA  
>MED12\_LsgRNA91  
TTCCACCCGCTCACTCTCACTTCGAGGGTC  
>MED12\_LsgRNA92  
TTCCACCCGCTCACTCTCACTTCGAGGGTC  
>MED12\_LsgRNA93  
GCGGACCCTCGAAGTGAGAGTGAGCGGGTG  
>MED12\_LsgRNA94  
GCGGACCCTCGAAGTGAGAGTGAGCGGGTG  
>MED12\_LsgRNA95  
GATGACCCTGTCTCTGCTGACTGTTGGAAA  
>MED12\_LsgRNA96  
GATGACCCTGTCTCTGCTGACTGTTGGAAA  
>MED12\_LsgRNA97  
GAACACCGGCCCTGAAGCGGCCGCGGCTG  
>MED12\_LsgRNA98  
GAACACCGGCCCTGAAGCGGCCGCGGCTG  
>MED12\_LsgRNA99  
TGGGACCTAGCAAGGATGGGCATGAGGTAA  
>MED12\_LsgRNA100  
TGGGACCTAGCAAGGATGGGCATGAGGTAA

>MED12\_LsgRNA101  
GCTTACCTCATGCCCATCCTTGCTAGGTCC  
>MED12\_LsgRNA102  
GCTTACCTCATGCCCATCCTTGCTAGGTCC  
>MED12\_LsgRNA103  
TCACACCTTCACCTACACGGGGCTAGGCAA  
>MED12\_LsgRNA104  
TCACACCTTCACCTACACGGGGCTAGGCAA  
>MED12\_LsgRNA105  
AGCTACGAACACCGGCCCTGAAGCGGCCG  
>MED12\_LsgRNA106  
AGCTACGAACACCGGCCCTGAAGCGGCCG  
>MED12\_LsgRNA107  
AGGAACGCAAGAAGAAGTCCACCAAGGGCA  
>MED12\_LsgRNA108  
AGGAACGCAAGAAGAAGTCCACCAAGGGCA  
>MED12\_LsgRNA109  
GTACACGGAGACTGGCCCTGCAGCTGGATG  
>MED12\_LsgRNA110  
GTACACGGAGACTGGCCCTGCAGCTGGATG  
>MED12\_LsgRNA111  
AGGCACTAGGACAGCACAGGAGGATGGTCT  
>MED12\_LsgRNA112  
AGGCACTAGGACAGCACAGGAGGATGGTCT  
>MED12\_LsgRNA113  
CCCTACTATGCCCTGTGAGGGGAAGGGCAG  
>MED12\_LsgRNA114  
CCCTACTATGCCCTGTGAGGGGAAGGGCAG  
>MED12\_LsgRNA115  
CAGGACTATGGAATGGGCCCGGTTCGGAGC  
>MED12\_LsgRNA116  
CAGGACTATGGAATGGGCCCGGTTCGGAGC  
>MED12\_LsgRNA117  
AGGCACTCAAACCTGCGGCTCAACCTGGTGA  
>MED12\_LsgRNA118  
AGGCACTCAAACCTGCGGCTCAACCTGGTGA  
>MED12\_LsgRNA119  
TGCCACTCACACAGGACTATGGAATGGGCC  
>MED12\_LsgRNA120  
TGCCACTCACACAGGACTATGGAATGGGCC  
>MED12\_LsgRNA121  
TGGCACTCACCTGCAGGTAGTGGCTGGTTC  
>MED12\_LsgRNA122  
AGCCACTCACGCAACTAGCCAAAAAGGTAA

>MED12\_LsgRNA123  
AGCCACTCACGCAACTAGCCAAAAAGGTAA  
>MED12\_LsgRNA124  
CTGCACTCAGTGACTTGCAATAGCCGGTCA  
>MED12\_LsgRNA125  
CTATACTCCTTATGTTTCTCATGTGGGATT  
>MED12\_LsgRNA126  
CTATACTCCTTATGTTTCTCATGTGGGATT  
>MED12\_LsgRNA127  
ACTGACTGATAGCAGAATTAAGACCGGCTC  
>MED12\_LsgRNA128  
ACTGACTGATAGCAGAATTAAGACCGGCTC  
>MED12\_LsgRNA129  
ATCGACTGCTGGACAATGAGGATGGGGAAA  
>MED12\_LsgRNA130  
ATCGACTGCTGGACAATGAGGATGGGGAAA  
>MED12\_LsgRNA131  
GGGTACTTCATACTTTGGAAGTGCTGGACA  
>MED12\_LsgRNA132  
GGGTACTTCATACTTTGGAAGTGCTGGACA  
>MED12\_LsgRNA133  
TAACACTTGGTTCACTGACTTGGCTGGCAC  
>MED12\_LsgRNA134  
TAACACTTGGTTCACTGACTTGGCTGGCAC  
>MED12\_LsgRNA135  
GAGCAGAAAGGGAGCCAGAGGCGATGGAAC  
>MED12\_LsgRNA136  
GAGCAGAAAGGGAGCCAGAGGCGATGGAAC  
>MED12\_LsgRNA137  
GAACAGAAGAACTTCCAGAGGAGGAGGGAG  
>MED12\_LsgRNA138  
GAACAGAAGAACTTCCAGAGGAGGAGGGAG  
>MED12\_LsgRNA139  
TTACAGAAGATGGCTGAATACTACCGGCCA  
>MED12\_LsgRNA140  
TTACAGAAGATGGCTGAATACTACCGGCCA  
>MED12\_LsgRNA141  
AAGGAGAAGATTGAAGGGACCCCTTGGGGTT  
>MED12\_LsgRNA142  
AAGGAGAAGATTGAAGGGACCCCTTGGGGTT  
>MED12\_LsgRNA143  
GATAAGAAGGGCTGCTGGCTCAATAGGGAC  
>MED12\_LsgRNA144  
GATAAGAAGGGCTGCTGGCTCAATAGGGAC

>MED12\_LsgRNA145  
TCAAAGACCTGTGCCATCTGGTCCTGGTTG  
>MED12\_LsgRNA146  
TCAAAGACCTGTGCCATCTGGTCCTGGTTG  
>MED12\_LsgRNA147  
CTCTAGAGCGCTCTGGTGTATGGCTGGTGG  
>MED12\_LsgRNA148  
CTCTAGAGCGCTCTGGTGTATGGCTGGTGG  
>MED12\_LsgRNA149  
CTAGAGAGCTGTTGTTGAAGTTGCCGGACC  
>MED12\_LsgRNA150  
CTAGAGAGCTGTTGTTGAAGTTGCCGGACC  
>MED12\_LsgRNA151  
AGGGAGAGGGAGGCCGGGGACCAGGGGCTC  
>MED12\_LsgRNA152  
AGGGAGAGGGAGGCCGGGGACCAGGGGCTC  
>MED12\_LsgRNA153  
ATGTAGAGGTGGCAATCCGGCAGTGGGATT  
>MED12\_LsgRNA154  
ATGTAGAGGTGGCAATCCGGCAGTGGGATT  
>MED12\_LsgRNA155  
CTCTAGAGTGTTCGATCATGAACTCAGGTGC  
>MED12\_LsgRNA156  
CTCTAGAGTGTTCGATCATGAACTCAGGTGC  
>MED12\_LsgRNA157  
ACTCAGATCATCACCAAGTACTTATGGGAG  
>MED12\_LsgRNA158  
ACTCAGATCATCACCAAGTACTTATGGGAG  
>MED12\_LsgRNA159  
CCAGAGATCTGTACCTGGTGCACCTGGCTG  
>MED12\_LsgRNA160  
CCAGAGATCTGTACCTGGTGCACCTGGCTG  
>MED12\_LsgRNA161  
ACTTAGCAAAGATATCTTCAGCAGTGGGGA  
>MED12\_LsgRNA162  
ACTTAGCAAAGATATCTTCAGCAGTGGGGA  
>MED12\_LsgRNA163  
CAGCAGCAGCAGCAGCAGATCCTGCGGGTA  
>MED12\_LsgRNA164  
CAGCAGCAGCAGCAGCAGATCCTGCGGGTA  
>MED12\_LsgRNA165  
CAGCAGCAGCAGCAGTACCACATCCGGCAG  
>MED12\_LsgRNA166  
CAGCAGCAGCAGCAGTACCACATCCGGCAG



>MED12\_LsgRNA167  
ACATAGCCACTGGGCCGCTGTTGCAGGTGG  
>MED12\_LsgRNA168  
ACATAGCCACTGGGCCGCTGTTGCAGGTGG  
>MED12\_LsgRNA169  
AGGCAGCCAGCAGGTGGCGGTCGCAGGAGG  
>MED12\_LsgRNA170  
AGGCAGCCAGCAGGTGGCGGTCGCAGGAGG  
>MED12\_LsgRNA171  
CTGTAGCCATTTAAAGAACAAATTTGGGGA  
>MED12\_LsgRNA172  
CTGTAGCCATTTAAAGAACAAATTTGGGGA  
>MED12\_LsgRNA173  
GAGCAGCCCCGGTTTGTTCAGTTTGGGGG  
>MED12\_LsgRNA174  
GAGCAGCCCCGGTTTGTTCAGTTTGGGGG  
>MED12\_LsgRNA175  
TTGAAGCCGTCAGCACCACTCTCTTGGGGC  
>MED12\_LsgRNA176  
TTGAAGCCGTCAGCACCACTCTCTTGGGGC  
>MED12\_LsgRNA177  
TCCAAGCCTTACTCGGAGAAGCAGAGGCAG  
>MED12\_LsgRNA178  
TCCAAGCCTTACTCGGAGAAGCAGAGGCAG  
>MED12\_LsgRNA179  
AACCAGCGTTGGTCGTACTGTTTGGGGTG  
>MED12\_LsgRNA180  
AACCAGCGTTGGTCGTACTGTTTGGGGTG  
>MED12\_LsgRNA181  
CAGCAGCTACCTGGGGCTGGGACTGGGGCT  
>MED12\_LsgRNA182  
CAGCAGCTACCTGGGGCTGGGACTGGGGCT  
>MED12\_LsgRNA183  
CTGCAGCTCACACCTTACCTACACGGGGC  
>MED12\_LsgRNA184  
CTGCAGCTCACACCTTACCTACACGGGGC  
>MED12\_LsgRNA185  
CAGGAGGAACAGAAGAACTTCCAGAGGAGG  
>MED12\_LsgRNA186  
CAGGAGGAACAGAAGAACTTCCAGAGGAGG  
>MED12\_LsgRNA187  
GAACAGGACTCTGAGCCAGGGGCCCGGCTT  
>MED12\_LsgRNA188  
GAACAGGACTCTGAGCCAGGGGCCCGGCTT

>MED12\_LsgRNA189  
CTGCAGGAGGACATCCTGGAAAATGGGAGC  
>MED12\_LsgRNA190  
CTGCAGGAGGACATCCTGGAAAATGGGAGC  
>MED12\_LsgRNA191  
GGGTAGGATCTACAAGAGTAGGATTGGTAG  
>MED12\_LsgRNA192  
GGGTAGGATCTACAAGAGTAGGATTGGTAG  
>MED12\_LsgRNA193  
TGGCAGGATTGAAGCTGACGTTCTTGGCAC  
>MED12\_LsgRNA194  
TGGCAGGATTGAAGCTGACGTTCTTGGCAC  
>MED12\_LsgRNA195  
GTCCAGGCACTACTCACATTGTTAGGGGTC  
>MED12\_LsgRNA196  
GTCCAGGCACTACTCACATTGTTAGGGGTC  
>MED12\_LsgRNA197  
CTGAAGGCAGCAGCAGCAGCAAGCTGGAAG  
>MED12\_LsgRNA198  
TAATAGGCGCGGGGCCGGGGCCTCAGGTGT  
>MED12\_LsgRNA199  
TAATAGGCGCGGGGCCGGGGCCTCAGGTGT  
>MED12\_LsgRNA200  
GAGCAGGCGGCTCCTCATCTTCTGGGGGCA  
>MED12\_LsgRNA201  
GAGCAGGCGGCTCCTCATCTTCTGGGGGCA  
>MED12\_LsgRNA202  
GGTAAGGCTGGCTGGAGTAGCTGGGGGGCA  
>MED12\_LsgRNA203  
GGTAAGGCTGGCTGGAGTAGCTGGGGGGCA  
>MED12\_LsgRNA204  
GCACAGGCTTGGTCTTGCTGCTGCTGGGCA  
>MED12\_LsgRNA205  
GCACAGGCTTGGTCTTGCTGCTGCTGGGCA  
>MED12\_LsgRNA206  
TGAAAGGGCAGGATGAACAACGCGAGGGAC  
>MED12\_LsgRNA207  
TGAAAGGGCAGGATGAACAACGCGAGGGAC  
>MED12\_LsgRNA208  
CTCCAGGTAATAGGCGCGGGGCCGGGGCCT  
>MED12\_LsgRNA209  
CTCCAGGTAATAGGCGCGGGGCCGGGGCCT  
>MED12\_LsgRNA210  
AAGCAGGTCACTAAAGGGAGTCGAGGGTGT

>MED12\_LsgRNA211  
AAGCAGGTCACTAAAGGGAGTCGAGGGTGT  
>MED12\_LsgRNA212  
GTGTAGGTGAAGGTGTGAGCTGCAGGGTTC  
>MED12\_LsgRNA213  
GTGTAGGTGAAGGTGTGAGCTGCAGGGTTC  
>MED12\_LsgRNA214  
ACTGAGGTGGGCAGTTTAGCAATGAGGGGG  
>MED12\_LsgRNA215  
TTTCAGTAAGAAGGAAGAGGTGTTTGGGTA  
>MED12\_LsgRNA216  
TTTCAGTAAGAAGGAAGAGGTGTTTGGGTA  
>MED12\_LsgRNA217  
CAAGAGTAGGATTGGTAGAAGGGTGGGTGC  
>MED12\_LsgRNA218  
CAAGAGTAGGATTGGTAGAAGGGTGGGTGC  
>MED12\_LsgRNA219  
CAGAAGTAGGCAAGCCGGCGGGACAGGTAT  
>MED12\_LsgRNA220  
CAGAAGTAGGCAAGCCGGCGGGACAGGTAT  
>MED12\_LsgRNA221  
CTGAAGTCAGAGCGTTCAAACTATGGCTG  
>MED12\_LsgRNA222  
CTGAAGTCAGAGCGTTCAAACTATGGCTG  
>MED12\_LsgRNA223  
CCTCAGTCCAGGGACATGTGTTAAAGGCTG  
>MED12\_LsgRNA224  
CCTCAGTCCAGGGACATGTGTTAAAGGCTG  
>MED12\_LsgRNA225  
GAACAGTCCGAGTGGACCGGCGAGTGGCTC  
>MED12\_LsgRNA226  
GAACAGTCCGAGTGGACCGGCGAGTGGCTC  
>MED12\_LsgRNA227  
TTGTAGTGAACAGGACTCTGAGCCAGGGGC  
>MED12\_LsgRNA228  
TTGTAGTGAACAGGACTCTGAGCCAGGGGC  
>MED12\_LsgRNA229  
TGAGAGTGCAAGTATACATGTTGTGGGAGA  
>MED12\_LsgRNA230  
AATGAGTGCCAGGGCGTCCAGGCAGGCGT  
>MED12\_LsgRNA231  
AATGAGTGCCAGGGCGTCCAGGCAGGCGT  
>MED12\_LsgRNA232  
TCCTAGTGGCTGGCACTCACCTGCAGGTAG

>MED12\_LsgRNA233  
TCCTAGTGGCTGGCACTCACCTGCAGGTAG  
>MED12\_LsgRNA234  
CAGAAGTTATCCTTCTGGTTCACCTGGGGC  
>MED12\_LsgRNA235  
CAGAAGTTATCCTTCTGGTTCACCTGGGGC  
>MED12\_LsgRNA236  
TGCTAGTTGGGGGCTGAGGAGCAGGGGTGG  
>MED12\_LsgRNA237  
TGCTAGTTGGGGGCTGAGGAGCAGGGGTGG  
>MED12\_LsgRNA238  
TTCAATAACCAGCCTGCTGTCTCTGGGGAT  
>MED12\_LsgRNA239  
TTCAATAACCAGCCTGCTGTCTCTGGGGAT  
>MED12\_LsgRNA240  
GATCATCAAAGGGAGAGGGAGGCCGGGGAC  
>MED12\_LsgRNA241  
GATCATCAAAGGGAGAGGGAGGCCGGGGAC  
>MED12\_LsgRNA242  
GTTCGATCACGTTCTTTGCGTGAAGAGGAAC  
>MED12\_LsgRNA243  
GTTCGATCACGTTCTTTGCGTGAAGAGGAAC  
>MED12\_LsgRNA244  
GAGAATCAGAAGCCGCAGATGAGAAGGGTT  
>MED12\_LsgRNA245  
GAGAATCAGAAGCCGCAGATGAGAAGGGTT  
>MED12\_LsgRNA246  
CCCAATCCAAAGATTTCGGTTACAAAGGGAG  
>MED12\_LsgRNA247  
CCCAATCCAAAGATTTCGGTTACAAAGGGAG  
>MED12\_LsgRNA248  
CTCCATCCACGATGCGGTTCTGGGAGGCAG  
>MED12\_LsgRNA249  
TGCCATCCCTTCACTCCTTAATGCTGGTGA  
>MED12\_LsgRNA250  
TGCCATCCCTTCACTCCTTAATGCTGGTGA  
>MED12\_LsgRNA251  
TTCTATCCGACCTGAGCACAGGCTTGGTCT  
>MED12\_LsgRNA252  
TTCTATCCGACCTGAGCACAGGCTTGGTCT  
>MED12\_LsgRNA253  
GGACATCCTGGAAAATGGGAGCACTGGGAG  
>MED12\_LsgRNA254  
GGACATCCTGGAAAATGGGAGCACTGGGAG

>MED12\_LsgRNA255  
CCTCATCGACTTTGCCATTTCAGGTGGGGAA  
>MED12\_LsgRNA256  
CCTCATCGACTTTGCCATTTCAGGTGGGGAA  
>MED12\_LsgRNA257  
AGCCATCGGAATCAAATATGCGCTGGGCAC  
>MED12\_LsgRNA258  
AGCCATCGGAATCAAATATGCGCTGGGCAC  
>MED12\_LsgRNA259  
CGTGATGACATCTCGGGTCTGCTTGGGCAG  
>MED12\_LsgRNA260  
CGTGATGACATCTCGGGTCTGCTTGGGCAG  
>MED12\_LsgRNA261  
ACCCATGACGCCAGTCATGGTTGTGGGCAG  
>MED12\_LsgRNA262  
ACCCATGACGCCAGTCATGGTTGTGGGCAG  
>MED12\_LsgRNA263  
TACCATGACTCCAATGAGTGCCCAGGGCGT  
>MED12\_LsgRNA264  
TACCATGACTCCAATGAGTGCCCAGGGCGT  
>MED12\_LsgRNA265  
TCAGATGACTCCCAGCTCTTCCTACGGTTT  
>MED12\_LsgRNA266  
TCAGATGACTCCCAGCTCTTCCTACGGTTT  
>MED12\_LsgRNA267  
GGACATGCTGAGCGTGCTCATCAATGGGAC  
>MED12\_LsgRNA268  
GGACATGCTGAGCGTGCTCATCAATGGGAC  
>MED12\_LsgRNA269  
GGACATGGACTGACCTCCACTCAAAGGTAC  
>MED12\_LsgRNA270  
GGACATGGACTGACCTCCACTCAAAGGTAC  
>MED12\_LsgRNA271  
GAAGATGGCTGAATACTACCGGCCAGGGCC  
>MED12\_LsgRNA272  
GAAGATGGCTGAATACTACCGGCCAGGGCC  
>MED12\_LsgRNA273  
ACTTATGGGAGCAGTTACAGAAGATGGCTG  
>MED12\_LsgRNA274  
ACTTATGGGAGCAGTTACAGAAGATGGCTG  
>MED12\_LsgRNA275  
CATCATGGGGCAAGGGCCCTATCGTGGAAC  
>MED12\_LsgRNA276  
CATCATGGGGCAAGGGCCCTATCGTGGAAC

>MED12\_LsgRNA277  
AGTCATGGTTGTGGGCAGCACTCCAGGGTA  
>MED12\_LsgRNA278  
AGTCATGGTTGTGGGCAGCACTCCAGGGTA  
>MED12\_LsgRNA279  
GCGGATTCCTACTGTAGGCTTGTCTGGGGA  
>MED12\_LsgRNA280  
GCGGATTCCTACTGTAGGCTTGTCTGGGGA  
>MED12\_LsgRNA281  
CAGGATTGAACTTACTGAGAAATCAGGCTT  
>MED12\_LsgRNA282  
CAGGATTGAACTTACTGAGAAATCAGGCTT  
>MED12\_LsgRNA283  
CCGGATTGCCACCTCTACATCATGGGGCAA  
>MED12\_LsgRNA284  
CCGGATTGCCACCTCTACATCATGGGGCAA  
>MED12\_LsgRNA285  
AAGAATTGGAGAAGGGTCAGCACCTGGGTT  
>MED12\_LsgRNA286  
AAGAATTGGAGAAGGGTCAGCACCTGGGTT  
>MED12\_LsgRNA287  
CCACCAAACAGAAGATCTCGCCCTGGGATC  
>MED12\_LsgRNA288  
TCCTCAAAGAGAACACTGGAACTAGGGTCA  
>MED12\_LsgRNA289  
TCCTCAAAGAGAACACTGGAACTAGGGTCA  
>MED12\_LsgRNA290  
TTAGCAAAGATATCTTCAGCAGTGGGGAAG  
>MED12\_LsgRNA291  
CAGACAAAGCTGTAGCGGTTAGCAGGGTTC  
>MED12\_LsgRNA292  
CAGACAAAGCTGTAGCGGTTAGCAGGGTTC  
>MED12\_LsgRNA293  
TCCTCAACCAGGACCAGATGGCACAGGTCT  
>MED12\_LsgRNA294  
TCCTCAACCAGGACCAGATGGCACAGGTCT  
>MED12\_LsgRNA295  
GCTTCAACCCCTCAAAAAGATCCCAGGGCG  
>MED12\_LsgRNA296  
TCTCCAAGAGGGAGTTCATCTCCTGGGGAG  
>MED12\_LsgRNA297  
TCTCCAAGAGGGAGTTCATCTCCTGGGGAG  
>MED12\_LsgRNA298  
TCTACAAGAGTAGGATTGGTAGAAGGGTGG

>MED12\_LsgRNA299  
TCTACAAGAGTAGGATTGGTAGAAGGGTGG  
>MED12\_LsgRNA300  
AAAACAAGCGTGCATACATGAACCTGGCGA  
>MED12\_LsgRNA301  
AAAACAAGCGTGCATACATGAACCTGGCGA  
>MED12\_LsgRNA302  
TGCCCACAACCATGACTGGCGTCATGGGTT  
>MED12\_LsgRNA303  
TGCCCACAACCATGACTGGCGTCATGGGTT  
>MED12\_LsgRNA304  
GGTACACAGAGGTCTTATAAGAGGAGGGTT  
>MED12\_LsgRNA305  
GGTACACAGAGGTCTTATAAGAGGAGGGTT  
>MED12\_LsgRNA306  
AGGGCACATAAGCAGGTCACTAAAGGGAGT  
>MED12\_LsgRNA307  
AGGGCACATAAGCAGGTCACTAAAGGGAGT  
>MED12\_LsgRNA308  
TTAACACATGTCCCTGGACTGAGGTGGGCA  
>MED12\_LsgRNA309  
ATGACACCACAGCATCATCATCTGAGGAGA  
>MED12\_LsgRNA310  
ATGACACCACAGCATCATCATCTGAGGAGA  
>MED12\_LsgRNA311  
TGTGCACCAGCAGGCCCCACCTATGGACA  
>MED12\_LsgRNA312  
TGTGCACCAGCAGGCCCCACCTATGGACA  
>MED12\_LsgRNA313  
CCCCCACCCAAGGAGAAGATTGAAGGGACC  
>MED12\_LsgRNA314  
CCCCCACCCAAGGAGAAGATTGAAGGGACC  
>MED12\_LsgRNA315  
GCAGCACCAGCAGACCACGGAGTGGGCCA  
>MED12\_LsgRNA316  
GCAGCACCAGCAGACCACGGAGTGGGCCA  
>MED12\_LsgRNA317  
CCGCCACCTGCAACAGCGGCCAGTGGCTA  
>MED12\_LsgRNA318  
CCGCCACCTGCAACAGCGGCCAGTGGCTA  
>MED12\_LsgRNA319  
GCAGCACTCCAGGGTAAGTTGGTCGGGTGG  
>MED12\_LsgRNA320  
GCAGCACTCCAGGGTAAGTTGGTCGGGTGG

>MED12\_LsgRNA321  
TAGCCACTGGGCCGCTGTTGCAGGTGGCGG  
>MED12\_LsgRNA322  
TAGCCACTGGGCCGCTGTTGCAGGTGGCGG  
>MED12\_LsgRNA323  
CCCCACTTCCTGCAGGCCCTGGCCGGTAG  
>MED12\_LsgRNA324  
CCCCACTTCCTGCAGGCCCTGGCCGGTAG  
>MED12\_LsgRNA325  
CACCCAGAACCAGCCACTACCTGCAGGTGA  
>MED12\_LsgRNA326  
GGTTCAGAACCTTCAAGATATCCTTGGTGA  
>MED12\_LsgRNA327  
GGTTCAGAACCTTCAAGATATCCTTGGTGA  
>MED12\_LsgRNA328  
CTGGCAGAGTTGTCTCACCTTGGCAGGATT  
>MED12\_LsgRNA329  
CTGGCAGAGTTGTCTCACCTTGGCAGGATT  
>MED12\_LsgRNA330  
GGAGCAGATCACGAGCTTTGCCCTTGGCAT  
>MED12\_LsgRNA331  
GGAGCAGATCACGAGCTTTGCCCTTGGCAT  
>MED12\_LsgRNA332  
GGACCAGATGGCACAGGTCTTTGAGGGGTA  
>MED12\_LsgRNA333  
GGACCAGATGGCACAGGTCTTTGAGGGGTA  
>MED12\_LsgRNA334  
ATTGCAGCAACACACAGGCCCTGCAGGTAC  
>MED12\_LsgRNA335  
ATTGCAGCAACACACAGGCCCTGCAGGTAC  
>MED12\_LsgRNA336  
GCAGCAGCAACCTGCGGTGCCCCAAGGACA  
>MED12\_LsgRNA337  
GCAGCAGCAACCTGCGGTGCCCCAAGGACA  
>MED12\_LsgRNA338  
CCGTCAGCACTCTCTTGGGGCTGGTTT  
>MED12\_LsgRNA339  
CCGTCAGCACTCTCTTGGGGCTGGTTT  
>MED12\_LsgRNA340  
CAGCCAGCAGGTGGCGGTTCGAGGAGGAGC  
>MED12\_LsgRNA341  
CAGCCAGCAGGTGGCGGTTCGAGGAGGAGC  
>MED12\_LsgRNA342  
AGGACAGCCACGATGCACAGGCACAGGCTA



>MED12\_LsgRNA343  
AGGACAGCCACGATGCACAGGCACAGGCTA  
>MED12\_LsgRNA344  
GCCACAGCCCAGTACCAACATATTTGGACG  
>MED12\_LsgRNA345  
GCCACAGCCCAGTACCAACATATTTGGACG  
>MED12\_LsgRNA346  
CCAGCAGCCTTTAACACATGTCCCTGGACT  
>MED12\_LsgRNA347  
CCAGCAGCCTTTAACACATGTCCCTGGACT  
>MED12\_LsgRNA348  
TGCCCAGCGCATATTTGATTCCGATGGCTC  
>MED12\_LsgRNA349  
TGCCCAGCGCATATTTGATTCCGATGGCTC  
>MED12\_LsgRNA350  
CAACCAGCGGTTGGTCGTACTGTTTGGGGT  
>MED12\_LsgRNA351  
CAACCAGCGGTTGGTCGTACTGTTTGGGGT  
>MED12\_LsgRNA352  
CCAGCAGCTACCTGGGGCTGGGACTGGGGC  
>MED12\_LsgRNA353  
CCAGCAGCTACCTGGGGCTGGGACTGGGGC  
>MED12\_LsgRNA354  
TTGTCAGCTTCCTCAGGAATGGGTAGGAGA  
>MED12\_LsgRNA355  
TTGTCAGCTTCCTCAGGAATGGGTAGGAGA  
>MED12\_LsgRNA356  
CACACAGGACTATGGAATGGGCCCGGGTTCG  
>MED12\_LsgRNA357  
CACACAGGACTATGGAATGGGCCCGGGTTCG  
>MED12\_LsgRNA358  
ACTGCAGGAGGACATCCTGGAAAATGGGAG  
>MED12\_LsgRNA359  
ACTGCAGGAGGACATCCTGGAAAATGGGAG  
>MED12\_LsgRNA360  
GGTCCAGGCACTACTCACATTGTTAGGGGT  
>MED12\_LsgRNA361  
GGTCCAGGCACTACTCACATTGTTAGGGGT  
>MED12\_LsgRNA362  
CCAGCAGGCCCCACCTATGGACATGGACT  
>MED12\_LsgRNA363  
CCAGCAGGCCCCACCTATGGACATGGACT  
>MED12\_LsgRNA364  
GGAGCAGGCGGCTCCTCATCTTCTGGGGGC

>MED12\_LsgRNA365  
GGAGCAGGCGGCTCCTCATCTTCTGGGGGC  
>MED12\_LsgRNA366  
GAACCAGGGTTTGGGTGGTGCAGGAGGTCC  
>MED12\_LsgRNA367  
GAACCAGGGTTTGGGTGGTGCAGGAGGTCC  
>MED12\_LsgRNA368  
GCTCCAGGTAATAGGCGCGGGGCCGGGGCC  
>MED12\_LsgRNA369  
GCTCCAGGTAATAGGCGCGGGGCCGGGGCC  
>MED12\_LsgRNA370  
TGCTCAGGTAGGATGGCTGTTGAACGGACG  
>MED12\_LsgRNA371  
TGCTCAGGTAGGATGGCTGTTGAACGGACG  
>MED12\_LsgRNA372  
TAAGCAGGTCACTAAAGGGAGTCGAGGGTG  
>MED12\_LsgRNA373  
TAAGCAGGTCACTAAAGGGAGTCGAGGGTG  
>MED12\_LsgRNA374  
CACTCAGTACACCCCATACCTATCGGGATC  
>MED12\_LsgRNA375  
CACTCAGTACACCCCATACCTATCGGGATC  
>MED12\_LsgRNA376  
AGGTCAGTCCATGTCCATAGGTGGGGCCT  
>MED12\_LsgRNA377  
AGGTCAGTCCATGTCCATAGGTGGGGCCT  
>MED12\_LsgRNA378  
GGGCCAGTCTCCGTGTACAGAAGTAGGCAA  
>MED12\_LsgRNA379  
GGCCCAGTGGCTATGTGCACCAGCAGGCCC  
>MED12\_LsgRNA380  
GGCCCAGTGGCTATGTGCACCAGCAGGCCC  
>MED12\_LsgRNA381  
GTTCCAGTGTTCTCTTTGAGGACATGGAGA  
>MED12\_LsgRNA382  
GTTCCAGTGTTCTCTTTGAGGACATGGAGA  
>MED12\_LsgRNA383  
CCACCAGTTTCTGCTGTCCCTTTGCGGTTC  
>MED12\_LsgRNA384  
CCACCAGTTTCTGCTGTCCCTTTGCGGTTC  
>MED12\_LsgRNA385  
ACACCATAAGGGCCGCTCCGACCCGGGCCC  
>MED12\_LsgRNA386  
ACACCATAAGGGCCGCTCCGACCCGGGCCC

>MED12\_LsgRNA387  
GGATCATCAAAGGGAGAGGGAGGCCGGGGA  
>MED12\_LsgRNA388  
GGATCATCAAAGGGAGAGGGAGGCCGGGGA  
>MED12\_LsgRNA389  
CCCGCATCACAGGCACTGTGTATTTGGCTA  
>MED12\_LsgRNA390  
CCCGCATCACAGGCACTGTGTATTTGGCTA  
>MED12\_LsgRNA391  
ACAGCATCATCATCTGAGGAGATCTGGAGA  
>MED12\_LsgRNA392  
ACAGCATCATCATCTGAGGAGATCTGGAGA  
>MED12\_LsgRNA393  
TGCTCATCCCCAGAGACAGCAGGCTGGTTA  
>MED12\_LsgRNA394  
TGCTCATCCCCAGAGACAGCAGGCTGGTTA  
>MED12\_LsgRNA395  
GCCTCATCGACTTTGCCATTCAGGTGGGGA  
>MED12\_LsgRNA396  
GCCTCATCGACTTTGCCATTCAGGTGGGGA  
>MED12\_LsgRNA397  
GAGCCATCGGAATCAAATATGCGCTGGGCA  
>MED12\_LsgRNA398  
GAGCCATCGGAATCAAATATGCGCTGGGCA  
>MED12\_LsgRNA399  
GAAACATGAACATGGCCAGCTTCTCGGTGT  
>MED12\_LsgRNA400  
GAAACATGAACATGGCCAGCTTCTCGGTGT  
>MED12\_LsgRNA401  
AACCCATGACGCCAGTCATGGTTGTGGGCA  
>MED12\_LsgRNA402  
AACCCATGACGCCAGTCATGGTTGTGGGCA  
>MED12\_LsgRNA403  
GTACCATGACTCCAATGAGTGCCCAGGGCG  
>MED12\_LsgRNA404  
GTACCATGACTCCAATGAGTGCCCAGGGCG  
>MED12\_LsgRNA405  
TGCACATGCTGCACCAGAGGCAAGTGGTAT  
>MED12\_LsgRNA406  
TGCACATGCTGCACCAGAGGCAAGTGGTAT  
>MED12\_LsgRNA407  
GAAGCATGGGATGAACCGGTCCGATGGCTC  
>MED12\_LsgRNA408  
TTGGCATGTCATAACCACTTGCCCTCTGGTGC

>MED12\_LsgRNA409  
TTGGCATGTCATACCACTTGCCCTCTGGTGC  
>MED12\_LsgRNA410  
TCTCCATGTCCTCAAAGAGAACTGGAAC  
>MED12\_LsgRNA411  
TCTCCATGTCCTCAAAGAGAACTGGAAC  
>MED12\_LsgRNA412  
AGGGCATTGCAGACAAAGCTGTAGCGGTTA  
>MED12\_LsgRNA413  
AGGGCATTGCAGACAAAGCTGTAGCGGTTA  
>MED12\_LsgRNA414  
TCCACCAAACAGAAGATCTCGCCCTGGGAT  
>MED12\_LsgRNA415  
ACGACCAACCGCTGGTTGCACTCATGGCTG  
>MED12\_LsgRNA416  
ACGACCAACCGCTGGTTGCACTCATGGCTG  
>MED12\_LsgRNA417  
TTCTCCAAGAGGGAGTTCATCTCCTGGGGA  
>MED12\_LsgRNA418  
TTCTCCAAGAGGGAGTTCATCTCCTGGGGA  
>MED12\_LsgRNA419  
TGAACCAAGTGTTAATGGCACTCTGGGATC  
>MED12\_LsgRNA420  
TGAACCAAGTGTTAATGGCACTCTGGGATC  
>MED12\_LsgRNA421  
GGAACCACAGCCCCACTTCCTGCAGGCC  
>MED12\_LsgRNA422  
GGAACCACAGCCCCACTTCCTGCAGGCC  
>MED12\_LsgRNA423  
GCCCCACCCAAGGAGAAGATTGAAGGGAC  
>MED12\_LsgRNA424  
GCCCCACCCAAGGAGAAGATTGAAGGGAC  
>MED12\_LsgRNA425  
ATTTCCACCCAGTTCCAGCGCCAGGGGCTT  
>MED12\_LsgRNA426  
ATTTCCACCCAGTTCCAGCGCCAGGGGCTT  
>MED12\_LsgRNA427  
ACTGCCACCTCCTCCCTCCTCCTGGAAG  
>MED12\_LsgRNA428  
ACTGCCACCTCCTCCCTCCTCCTGGAAG  
>MED12\_LsgRNA429  
AGCACCCTCTCTTGGGGCTGGTTTGAAC  
>MED12\_LsgRNA430  
AGCACCCTCTCTTGGGGCTGGTTTGAAC

>MED12\_LsgRNA431  
TGAACCAGAAGGATAACTTCTGGCTGGTGA  
>MED12\_LsgRNA432  
TGAACCAGAAGGATAACTTCTGGCTGGTGA  
>MED12\_LsgRNA433  
AGGACCAGATGGCACAGGTCTTTGAGGGGT  
>MED12\_LsgRNA434  
AGGACCAGATGGCACAGGTCTTTGAGGGGT  
>MED12\_LsgRNA435  
AACACCAGCAGCAACAGCAGCAACAGGCGG  
>MED12\_LsgRNA436  
AACACCAGCAGCAACAGCAGCAACAGGCGG  
>MED12\_LsgRNA437  
TGAGCCAGCAGCCCTTCTTATCGCTGGTGC  
>MED12\_LsgRNA438  
TGAGCCAGCAGCCCTTCTTATCGCTGGTGC  
>MED12\_LsgRNA439  
GTCACCAGCCAGAAGTTATCCTTCTGGTTC  
>MED12\_LsgRNA440  
GTCACCAGCCAGAAGTTATCCTTCTGGTTC  
>MED12\_LsgRNA441  
GCAGCCAGCCAGCTACCAAGACAGAGGTGA  
>MED12\_LsgRNA442  
GCAGCCAGCCAGCTACCAAGACAGAGGTGA  
>MED12\_LsgRNA443  
AGCACCAGCGATAAGAAGGGCTGCTGGCTC  
>MED12\_LsgRNA444  
AGCACCAGCGATAAGAAGGGCTGCTGGCTC  
>MED12\_LsgRNA445  
CTCCCCAGGAGATGAACTCCCTCTTGGAGA  
>MED12\_LsgRNA446  
CTCCCCAGGAGATGAACTCCCTCTTGGAGA  
>MED12\_LsgRNA447  
GTCTCCAGGATTCAGAGGCACAATAGGAGC  
>MED12\_LsgRNA448  
GTCTCCAGGATTCAGAGGCACAATAGGAGC  
>MED12\_LsgRNA449  
CCGGCCAGGGCCTGCAGGAAGTGGGGGCTG  
>MED12\_LsgRNA450  
CCGGCCAGGGCCTGCAGGAAGTGGGGGCTG  
>MED12\_LsgRNA451  
GATCCCAGGGCGAGATCTTCTGTTTGGTGG  
>MED12\_LsgRNA452  
GATCCCAGGGCGAGATCTTCTGTTTGGTGG

>MED12\_LsgRNA453  
CACTCCAGGGTAAGTTGGTCCGGTGGGCAG  
>MED12\_LsgRNA454  
CACTCCAGGGTAAGTTGGTCCGGTGGGCAG  
>MED12\_LsgRNA455  
GGCTCCAGGTAATAGGCGCGGGGCCGGGGC  
>MED12\_LsgRNA456  
GGCTCCAGGTAATAGGCGCGGGGCCGGGGC  
>MED12\_LsgRNA457  
AGCGCCAGTCAGACAGTCTGGAAAAGGTTC  
>MED12\_LsgRNA458  
AGCGCCAGTCAGACAGTCTGGAAAAGGTTC  
>MED12\_LsgRNA459  
CACACCATAAGGGCCGCTCCGACCCGGGCC  
>MED12\_LsgRNA460  
CACACCATAAGGGCCGCTCCGACCCGGGCC  
>MED12\_LsgRNA461  
GTAGCCATTTAAAGAACAAATTTGGGGAGC  
>MED12\_LsgRNA462  
GTAGCCATTTAAAGAACAAATTTGGGGAGC  
>MED12\_LsgRNA463  
GCTGCCACCCGACCAACTTACCCTGGAGT  
>MED12\_LsgRNA464  
GCTGCCACCCGACCAACTTACCCTGGAGT  
>MED12\_LsgRNA465  
CGATCCCAGAGTGCCATTAACACTTGGTTC  
>MED12\_LsgRNA466  
CGATCCCAGAGTGCCATTAACACTTGGTTC  
>MED12\_LsgRNA467  
AGGCCCCAGCCGCGCCGCTTCAGGGGCCG  
>MED12\_LsgRNA468  
AGGCCCCAGCCGCGCCGCTTCAGGGGCCG  
>MED12\_LsgRNA469  
AAGACCCAGTGTGAGTAGTGCCAGGCGC  
>MED12\_LsgRNA470  
AAGACCCAGTGTGAGTAGTGCCAGGCGC  
>MED12\_LsgRNA471  
AGCCCCCAAACACTGACAAACCGGGGGCTG  
>MED12\_LsgRNA472  
AGCCCCCAAACACTGACAAACCGGGGGCTG  
>MED12\_LsgRNA473  
AGCTCCCCAAATTTGTTCTTTAAATGGCTA  
>MED12\_LsgRNA474  
AGCTCCCCAAATTTGTTCTTTAAATGGCTA

>MED12\_LsgRNA475  
ATCTCCCAACTTCCCCACCTGAATGGCAA  
>MED12\_LsgRNA476  
ATCTCCCAACTTCCCCACCTGAATGGCAA  
>MED12\_LsgRNA477  
CCAGCCCCAAGAGAGTGGTGCTGACGGCTT  
>MED12\_LsgRNA478  
CCAGCCCCAAGAGAGTGGTGCTGACGGCTT  
>MED12\_LsgRNA479  
GGTGCCCCACACAGACGTGCATAAGGGCAT  
>MED12\_LsgRNA480  
GGTGCCCCACACAGACGTGCATAAGGGCAT  
>MED12\_LsgRNA481  
GAGGCCCCAGCCGCGGCCGCTTCAGGGGCC  
>MED12\_LsgRNA482  
GAGGCCCCAGCCGCGGCCGCTTCAGGGGCC  
>MED12\_LsgRNA483  
TACACCCCATACCTATCGGGATCATGGTGC  
>MED12\_LsgRNA484  
TACACCCCATACCTATCGGGATCATGGTGC  
>MED12\_LsgRNA485  
GAGCCCCCAAACACTGACAAACCGGGGGCT  
>MED12\_LsgRNA486  
GAGCCCCCAAACACTGACAAACCGGGGGCT  
>MED12\_LsgRNA487  
ACAGCCCCCACTTCCTGCAGGCCCTGGCCG  
>MED12\_LsgRNA488  
ACAGCCCCCACTTCCTGCAGGCCCTGGCCG  
>MED12\_LsgRNA489  
AGAGCCCCCAAACACTGACAAACCGGGGGC  
>MED12\_LsgRNA490  
AGAGCCCCCAAACACTGACAAACCGGGGGC  
>MED12\_LsgRNA491  
TTCTCCCCTACTATGCCCTGTGAGGGGAAG  
>MED12\_LsgRNA492  
CCTTCCCCTCACAGGGCATAGTAGGGGAGA  
>MED12\_LsgRNA493  
CCTTCCCCTCACAGGGCATAGTAGGGGAGA  
>MED12\_LsgRNA494  
CCGGCCCCTGAAGCGGCCGCGGCTGGGGCC  
>MED12\_LsgRNA495  
CCGGCCCCTGAAGCGGCCGCGGCTGGGGCC  
>MED12\_LsgRNA496  
TCCACCCGCTCACTCTCACTTCGAGGGTCC

>MED12\_LsgRNA497  
TCCACCCGCTCACTCTCACTTCGAGGGTCC  
>MED12\_LsgRNA498  
CCCACCCGTGAACCACAGGGGATGCGGAAC  
>MED12\_LsgRNA499  
CCCACCCGTGAACCACAGGGGATGCGGAAC  
>MED12\_LsgRNA500  
TTTACCCTCAGGACCCCAAACAGAAGGAGG  
>MED12\_LsgRNA501  
TTTACCCTCAGGACCCCAAACAGAAGGAGG  
>MED12\_LsgRNA502  
CGGACCCTCGAAGTGAGAGTGAGCGGGTGG  
>MED12\_LsgRNA503  
CGGACCCTCGAAGTGAGAGTGAGCGGGTGG  
>MED12\_LsgRNA504  
CGGCCCTGAAGCGGCCGCGGCTGGGGCCT  
>MED12\_LsgRNA505  
CGGCCCTGAAGCGGCCGCGGCTGGGGCCT  
>MED12\_LsgRNA506  
AATACCCTTCCTGACACTGGTCGCAGGAAG  
>MED12\_LsgRNA507  
AATACCCTTCCTGACACTGGTCGCAGGAAG  
>MED12\_LsgRNA508  
GGCCCCGGCCCCGCGCCTATTACCTGGAGC  
>MED12\_LsgRNA509  
GGCCCCGGCCCCGCGCCTATTACCTGGAGC  
>MED12\_LsgRNA510  
TGGACCGGCGAGTGGCTCGAGGAGAGGAGC  
>MED12\_LsgRNA511  
TGGACCGGCGAGTGGCTCGAGGAGAGGAGC  
>MED12\_LsgRNA512  
GAGGCCGGGGACCAGGGGCTCCAAAGGCAA  
>MED12\_LsgRNA513  
GAGGCCGGGGACCAGGGGCTCCAAAGGCAA  
>MED12\_LsgRNA514  
GGGCCCGGGTCGGAGCGGCCCTTATGGTGT  
>MED12\_LsgRNA515  
GGGCCCGGGTCGGAGCGGCCCTTATGGTGT  
>MED12\_LsgRNA516  
GAAGCCGTCAGCACCACTCTCTTGGGGCTG  
>MED12\_LsgRNA517  
GAAGCCGTCAGCACCACTCTCTTGGGGCTG  
>MED12\_LsgRNA518  
GGTACCTAAGAATGTCAGGTCTCCAGGATT



>MED12\_LsgRNA519  
GGTACCTAAGAATGTCAGGTCTCCAGGATT  
>MED12\_LsgRNA520  
TGCTCCTATTGTGCCTCTGAATCCTGGAGA  
>MED12\_LsgRNA521  
TGCTCCTATTGTGCCTCTGAATCCTGGAGA  
>MED12\_LsgRNA522  
TACCCCTCAAAGACCTGTGCCATCTGGTCC  
>MED12\_LsgRNA523  
TACCCCTCAAAGACCTGTGCCATCTGGTCC  
>MED12\_LsgRNA524  
GTGGCCTCATCGACTTTGCCATTCAGGTGG  
>MED12\_LsgRNA525  
GTGGCCTCATCGACTTTGCCATTCAGGTGG  
>MED12\_LsgRNA526  
CCTCCCTCTACAGCCAGGTGCACCAGGTAC  
>MED12\_LsgRNA527  
CCTCCCTCTACAGCCAGGTGCACCAGGTAC  
>MED12\_LsgRNA528  
TGCTCCTCTCCTCGAGCCACTCGCCGGTCC  
>MED12\_LsgRNA529  
CTCACCTCTGTCTTGGTAGCTGGCTGGCTG  
>MED12\_LsgRNA530  
CTCACCTCTGTCTTGGTAGCTGGCTGGCTG  
>MED12\_LsgRNA531  
CCCACCTGAATGGCAAAGTCGATGAGGCCA  
>MED12\_LsgRNA532  
CCCACCTGAATGGCAAAGTCGATGAGGCCA  
>MED12\_LsgRNA533  
AGGGCCTGCAGGAAGTGGGGCTGTGGTTC  
>MED12\_LsgRNA534  
AGGGCCTGCAGGAAGTGGGGCTGTGGTTC  
>MED12\_LsgRNA535  
CTTTCCTGCCTCAGGATGAACTGACGGCCT  
>MED12\_LsgRNA536  
CTTTCCTGCCTCAGGATGAACTGACGGCCT  
>MED12\_LsgRNA537  
GCTTCCTGCGACCAGTGTGTCAGGAAGGGTAT  
>MED12\_LsgRNA538  
GCTTCCTGCGACCAGTGTGTCAGGAAGGGTAT  
>MED12\_LsgRNA539  
CTACCCTGCTAGAGCCTGAGAAAAAGGCTC  
>MED12\_LsgRNA540  
CTACCCTGCTAGAGCCTGAGAAAAAGGCTC

>MED12\_LsgRNA541  
GAATCCTGGAGACCTGACATTCTTAGGTAC  
>MED12\_LsgRNA542  
GAATCCTGGAGACCTGACATTCTTAGGTAC  
>MED12\_LsgRNA543  
TGCACCTGGCTGTAGAGGGAGGTAAGGAGT  
>MED12\_LsgRNA544  
TGCACCTGGCTGTAGAGGGAGGTAAGGAGT  
>MED12\_LsgRNA545  
TGCGCCTGGGCACTACTCAAACTGGGTCT  
>MED12\_LsgRNA546  
TGCGCCTGGGCACTACTCAAACTGGGTCT  
>MED12\_LsgRNA547  
TGTACCTGGTGCACCTGGCTGTAGAGGGAG  
>MED12\_LsgRNA548  
TGTACCTGGTGCACCTGGCTGTAGAGGGAG  
>MED12\_LsgRNA549  
TCTTCCTGTGCCTGCAGAAGGAGTTGGGGG  
>MED12\_LsgRNA550  
TCTTCCTGTGCCTGCAGAAGGAGTTGGGGG  
>MED12\_LsgRNA551  
TCCTCCTGTGCTGTCCTAGTGCCTTGTTTT  
>MED12\_LsgRNA552  
TCCTCCTGTGCTGTCCTAGTGCCTTGTTTT  
>MED12\_LsgRNA553  
GCCGCCTGTTGCTGCTGTTGCTGCTGGTGT  
>MED12\_LsgRNA554  
GCCGCCTGTTGCTGCTGTTGCTGCTGGTGT  
>MED12\_LsgRNA555  
GACTCCTTACCTCCCTCTACAGCCAGGTGC  
>MED12\_LsgRNA556  
TCCTCCTTAGGCTTCACCATTGGACGGGTA  
>MED12\_LsgRNA557  
TCCTCCTTAGGCTTCACCATTGGACGGGTA  
>MED12\_LsgRNA558  
GGTCCCTTCAATCTTCTCCTTGGGTGGGGG  
>MED12\_LsgRNA559  
GGTCCCTTCAATCTTCTCCTTGGGTGGGGG  
>MED12\_LsgRNA560  
GCTGCCTTCAGCCTCCTTGTGCTCTGGGTC  
>MED12\_LsgRNA561  
GCTGCCTTCAGCCTCCTTGTGCTCTGGGTC  
>MED12\_LsgRNA562  
ACCTCCTTCTGTTTGGGGTCCTGAGGGTAA

>MED12\_LsgRNA563  
ACCTCCTTCTGTTTGGGGTCCTGAGGGTAA  
>MED12\_LsgRNA564  
GTGGCCTTGGCGATGTTCTCCAAGAGGGAG  
>MED12\_LsgRNA565  
GTGGCCTTGGCGATGTTCTCCAAGAGGGAG  
>MED12\_LsgRNA566  
CTTGCCTTTGGAGCCCCTGGTCCCCGGCCT  
>MED12\_LsgRNA567  
TTTTCGAACGCACCTCCTTCTGTTTGGGGT  
>MED12\_LsgRNA568  
TTTTCGAACGCACCTCCTTCTGTTTGGGGT  
>MED12\_LsgRNA569  
ACATCGACTGCTGGACAATGAGGATGGGGA  
>MED12\_LsgRNA570  
ACATCGACTGCTGGACAATGAGGATGGGGA  
>MED12\_LsgRNA571  
AGATCGAGCAGCAGATCAAGGAGCGGGGAC  
>MED12\_LsgRNA572  
AGATCGAGCAGCAGATCAAGGAGCGGGGAC  
>MED12\_LsgRNA573  
GAGTCGAGGGTGTGCTGCTAGTTGGGGGCT  
>MED12\_LsgRNA574  
TGCTCGATCTCCCGCAACTTTGCACGGACC  
>MED12\_LsgRNA575  
TGCTCGATCTCCCGCAACTTTGCACGGACC  
>MED12\_LsgRNA576  
GCTTCGATTCCATCTTCAAGAAGGAGGCAT  
>MED12\_LsgRNA577  
GCTTCGATTCCATCTTCAAGAAGGAGGCAT  
>MED12\_LsgRNA578  
GAACCGCAAAGGGACAGCAGAACTGGTGG  
>MED12\_LsgRNA579  
GAACCGCAAAGGGACAGCAGAACTGGTGG  
>MED12\_LsgRNA580  
GGAACGCAAGAAGAAGTCCACCAAGGGCAA  
>MED12\_LsgRNA581  
GGAACGCAAGAAGAAGTCCACCAAGGGCAA  
>MED12\_LsgRNA582  
TCATCGCTCGGCAGTGTGCTCCTGGAAG  
>MED12\_LsgRNA583  
TCATCGCTCGGCAGTGTGCTCCTGGAAG  
>MED12\_LsgRNA584  
GTGCCGCTGATGATGATCTCCAGGAGGAGC

>MED12\_LsgRNA585  
GTGCCGCTGATGATGATCTCCAGGAGGAGC  
>MED12\_LsgRNA586  
AAGGCGCTGTCCTTGGGGCACCGCAGGTTG  
>MED12\_LsgRNA587  
AAGGCGCTGTCCTTGGGGCACCGCAGGTTG  
>MED12\_LsgRNA588  
GGGCCGCTGTTGCAGGTGGCGGGTAGGATC  
>MED12\_LsgRNA589  
GGGCCGCTGTTGCAGGTGGCGGGTAGGATC  
>MED12\_LsgRNA590  
AATGCGCTTTATGCGCTGCCGCTGGGGGTT  
>MED12\_LsgRNA591  
AATGCGCTTTATGCGCTGCCGCTGGGGGTT  
>MED12\_LsgRNA592  
GATGCGGCAGGTAAGCCGGGCCCTGGCTC  
>MED12\_LsgRNA593  
CTACCGGCCAGGGCCTGCAGGAAGTGGGGG  
>MED12\_LsgRNA594  
CTACCGGCCAGGGCCTGCAGGAAGTGGGGG  
>MED12\_LsgRNA595  
GTGGCGGGTAGGATCTACAAGAGTAGGATT  
>MED12\_LsgRNA596  
GTGGCGGGTAGGATCTACAAGAGTAGGATT  
>MED12\_LsgRNA597  
TGGTCGGGTGGGCAGCTTCTGCATTGGTAA  
>MED12\_LsgRNA598  
TGGTCGGGTGGGCAGCTTCTGCATTGGTAA  
>MED12\_LsgRNA599  
GTGGCGTACTGCACGTGTCGTGGCTGGTTCG  
>MED12\_LsgRNA600  
GTGGCGTACTGCACGTGTCGTGGCTGGTTCG  
>MED12\_LsgRNA601  
AGAACGTCAGCTTCAATCCTGCCAAGGTGA  
>MED12\_LsgRNA602  
AGAACGTCAGCTTCAATCCTGCCAAGGTGA  
>MED12\_LsgRNA603  
GTAGCGTCCAAATATGTTGGTACTGGGCTG  
>MED12\_LsgRNA604  
GTAGCGTCCAAATATGTTGGTACTGGGCTG  
>MED12\_LsgRNA605  
TGAGCGTGCTCATCAATGGGACATTGGCTG  
>MED12\_LsgRNA606  
GATCCTACCGCCACCTGCAACAGCGGCC

>MED12\_LsgRNA607  
GATCCTACCCGCCACCTGCAACAGCGGCC  
>MED12\_LsgRNA608  
GGCGCTACGGGCTGGGCAAGATGGCGGCCT  
>MED12\_LsgRNA609  
GGCGCTACGGGCTGGGCAAGATGGCGGCCT  
>MED12\_LsgRNA610  
CTTCCTACGGTTTGCAGACTTCCCAGGTAA  
>MED12\_LsgRNA611  
CTTCCTACGGTTTGCAGACTTCCCAGGTAA  
>MED12\_LsgRNA612  
CCATCTACTGCAACGTGGAGCCATCGGAAT  
>MED12\_LsgRNA613  
CCATCTACTGCAACGTGGAGCCATCGGAAT  
>MED12\_LsgRNA614  
ACCACTACTTTGGGTACCTTTGAGTGGAGG  
>MED12\_LsgRNA615  
ACCACTACTTTGGGTACCTTTGAGTGGAGG  
>MED12\_LsgRNA616  
GCTGCTAGTTGGGGGCTGAGGAGCAGGGGT  
>MED12\_LsgRNA617  
GCTGCTAGTTGGGGGCTGAGGAGCAGGGGT  
>MED12\_LsgRNA618  
GGTTCTATAACACACCTTAACTACAGGCAA  
>MED12\_LsgRNA619  
GGTTCTATAACACACCTTAACTACAGGCAA  
>MED12\_LsgRNA620  
CTCACTATCTTTGCCTGGAGCTGTTGGCGA  
>MED12\_LsgRNA621  
CTCACTATCTTTGCCTGGAGCTGTTGGCGA  
>MED12\_LsgRNA622  
TCTTCTCAAAACACTCAAGCACCCAGGTCA  
>MED12\_LsgRNA623  
GCTTCTCAAATCCTCGGATCTGGTGGGCAG  
>MED12\_LsgRNA624  
TGTTCTCAAGGCTGTGTTTGTACTTGGTAC  
>MED12\_LsgRNA625  
TGTTCTCAAGGCTGTGTTTGTACTTGGTAC  
>MED12\_LsgRNA626  
GCAGCTCAATCCTTGCCAGTCTGATGGAAG  
>MED12\_LsgRNA627  
GCAGCTCAATCCTTGCCAGTCTGATGGAAG  
>MED12\_LsgRNA628  
GCCACTCACACAGGACTATGGAATGGGCC

>MED12\_LsgRNA629  
GCCACTCACACAGGACTATGGAATGGGCCC  
>MED12\_LsgRNA630  
GCAGCTCACACCTTCACCTACACGGGGCTA  
>MED12\_LsgRNA631  
GTGGCTCACACGTGATGACATCTCGGGTCT  
>MED12\_LsgRNA632  
GTGGCTCACACGTGATGACATCTCGGGTCT  
>MED12\_LsgRNA633  
GGCGCTCACCTCTGTCTTGGTAGCTGGCTG  
>MED12\_LsgRNA634  
GGCGCTCACCTCTGTCTTGGTAGCTGGCTG  
>MED12\_LsgRNA635  
TGGTCTCAGAGATTGCTGCATAGTAGGCAC  
>MED12\_LsgRNA636  
TGGTCTCAGAGATTGCTGCATAGTAGGCAC  
>MED12\_LsgRNA637  
GGGGCTCAAAGGCAAGGTCCCCTCGGGAG  
>MED12\_LsgRNA638  
GGGGCTCAAAGGCAAGGTCCCCTCGGGAG  
>MED12\_LsgRNA639  
ACGGCTCCATCCACGATGCGGTTCTGGGAG  
>MED12\_LsgRNA640  
ACGGCTCCATCCACGATGCGGTTCTGGGAG  
>MED12\_LsgRNA641  
TGTTCTCCCCTACTATGCCCTGTGAGGGGA  
>MED12\_LsgRNA642  
TGTTCTCCCCTACTATGCCCTGTGAGGGGA  
>MED12\_LsgRNA643  
AGATCTCCTCAGATGATGATGCTGTGGTGT  
>MED12\_LsgRNA644  
AGATCTCCTCAGATGATGATGCTGTGGTGT  
>MED12\_LsgRNA645  
GGACCTCCTGCACCACCCAAACCCTGGTTC  
>MED12\_LsgRNA646  
GGACCTCCTGCACCACCCAAACCCTGGTTC  
>MED12\_LsgRNA647  
CAGCCTCCTTGTGCTCTGGGTCATCGGCAG  
>MED12\_LsgRNA648  
CAGCCTCCTTGTGCTCTGGGTCATCGGCAG  
>MED12\_LsgRNA649  
CCTTCTCGACATCTGGCTTCTCAGGGGATG  
>MED12\_LsgRNA650  
CCTTCTCGACATCTGGCTTCTCAGGGGATG

>MED12\_LsgRNA651  
GTGGCTCGAGGAGAGGAGCAGCAGCGGTTG  
>MED12\_LsgRNA652  
GTGGCTCGAGGAGAGGAGCAGCAGCGGTTG  
>MED12\_LsgRNA653  
AGCTCTCTAGAGCGCTCTGGTGTATGGCTG  
>MED12\_LsgRNA654  
AGCTCTCTAGAGCGCTCTGGTGTATGGCTG  
>MED12\_LsgRNA655  
CTCACTCTCACTTCGAGGGTCCGCTGGAGG  
>MED12\_LsgRNA656  
CTCACTCTCACTTCGAGGGTCCGCTGGAGG  
>MED12\_LsgRNA657  
ACATCTCTGTGGAGACAGCCAGTCTGGATG  
>MED12\_LsgRNA658  
ACATCTCTGTGGAGACAGCCAGTCTGGATG  
>MED12\_LsgRNA659  
ACACCTCTTCCTTCTTACTGAAAAATGGGGA  
>MED12\_LsgRNA660  
ACACCTCTTCCTTCTTACTGAAAAATGGGGA  
>MED12\_LsgRNA661  
AAGTCTGCAAACCGTAGGAAGAGCTGGGAG  
>MED12\_LsgRNA662  
AAGTCTGCAAACCGTAGGAAGAGCTGGGAG  
>MED12\_LsgRNA663  
CGCTCTGCAGAGGAGCCATCGGACCGGTTT  
>MED12\_LsgRNA664  
CGCTCTGCAGAGGAGCCATCGGACCGGTTT  
>MED12\_LsgRNA665  
TCACCTGCAGGTAGTGGCTGGTTCTGGGTG  
>MED12\_LsgRNA666  
TCACCTGCAGGTAGTGGCTGGTTCTGGGTG  
>MED12\_LsgRNA667  
TGAGCTGCATGAGGCGCTGCGCCTGGGCAC  
>MED12\_LsgRNA668  
TGAGCTGCATGAGGCGCTGCGCCTGGGCAC  
>MED12\_LsgRNA669  
TCCTCTGCCACTCACACAGGACTATGGAAT  
>MED12\_LsgRNA670  
TCCTCTGCCACTCACACAGGACTATGGAAT  
>MED12\_LsgRNA671  
GCTGCTGCTGCTGCTCAGGTAGGATGGCTG  
>MED12\_LsgRNA672  
GCTGCTGCTGCTGCTCAGGTAGGATGGCTG

>MED12\_LsgRNA673  
GGGCCTGCTGGTGCACATAGCCACTGGGCC  
>MED12\_LsgRNA674  
GGGCCTGCTGGTGCACATAGCCACTGGGCC  
>MED12\_LsgRNA675  
AAAGCTGCTGTCTGTTGCTGCTGCTGGGTC  
>MED12\_LsgRNA676  
AAAGCTGCTGTCTGTTGCTGCTGCTGGGTC  
>MED12\_LsgRNA677  
CTGGCTGGCTGCGTTTCTTGCCCTTGGTGG  
>MED12\_LsgRNA678  
CTGGCTGGCTGCGTTTCTTGCCCTTGGTGG  
>MED12\_LsgRNA679  
TTACCTGGGAAGTCTGCAAACCGTAGGAAG  
>MED12\_LsgRNA680  
TTACCTGGGAAGTCTGCAAACCGTAGGAAG  
>MED12\_LsgRNA681  
CGGGCTGGGCAAGATGGCGGCCTTCGGGAT  
>MED12\_LsgRNA682  
CGGGCTGGGCAAGATGGCGGCCTTCGGGAT  
>MED12\_LsgRNA683  
CGCCCTGGGCACTCATTGGAGTCATGGTAC  
>MED12\_LsgRNA684  
CGCCCTGGGCACTCATTGGAGTCATGGTAC  
>MED12\_LsgRNA685  
GTGGCTGGTCGTAAAGAACCCCAAGGGTCC  
>MED12\_LsgRNA686  
GTACCTGGTGCACCTGGCTGTAGAGGGAGG  
>MED12\_LsgRNA687  
GTACCTGGTGCACCTGGCTGTAGAGGGAGG  
>MED12\_LsgRNA688  
ATCGCTGGTGCTAACATGTCTGAAAGGGCA  
>MED12\_LsgRNA689  
ATCGCTGGTGCTAACATGTCTGAAAGGGCA  
>MED12\_LsgRNA690  
GGGGCTGGTTTGGAACAGTCCGAGTGGACC  
>MED12\_LsgRNA691  
GGGGCTGGTTTGGAACAGTCCGAGTGGACC  
>MED12\_LsgRNA692  
CTGGCTGTCTCCACAGAGATGTTGCGGCCA  
>MED12\_LsgRNA693  
CTTCCTGTGCCTGCAGAAGGAGTTGGGGGA  
>MED12\_LsgRNA694  
CTTCCTGTGCCTGCAGAAGGAGTTGGGGGA



>MED12\_LsgRNA695  
CAGGCTGTGTGGCGTCGTGAAGCATGGGAT  
>MED12\_LsgRNA696  
ATGGCTGTTGAACGGACGCCTGCCTGGACG  
>MED12\_LsgRNA697  
ATGGCTGTTGAACGGACGCCTGCCTGGACG  
>MED12\_LsgRNA698  
CCTCCTTAGGCTTCACCATTGGACGGGTAC  
>MED12\_LsgRNA699  
CCTCCTTAGGCTTCACCATTGGACGGGTAC  
>MED12\_LsgRNA700  
TCCTCTTATAAGACCTCTGTGTACCGGCAG  
>MED12\_LsgRNA701  
TCCTCTTATAAGACCTCTGTGTACCGGCAG  
>MED12\_LsgRNA702  
GTCCCTTCAATCTTCTCCTTGGGTGGGGGC  
>MED12\_LsgRNA703  
GTCCCTTCAATCTTCTCCTTGGGTGGGGGC  
>MED12\_LsgRNA704  
CTGCCTTCAGCCTCCTTGTGCTCTGGGTCA  
>MED12\_LsgRNA705  
CTGCCTTCAGCCTCCTTGTGCTCTGGGTCA  
>MED12\_LsgRNA706  
AGAACTTCCAGAGGAGGAGGGAGGAGGTGG  
>MED12\_LsgRNA707  
AGAACTTCCAGAGGAGGAGGGAGGAGGTGG  
>MED12\_LsgRNA708  
ACCTCTTCCTTCTTACTGAAAATGGGGACC  
>MED12\_LsgRNA709  
ACCTCTTCCTTCTTACTGAAAATGGGGACC  
>MED12\_LsgRNA710  
CTGGCTTCGATTCCATCTTCAAGAAGGAGG  
>MED12\_LsgRNA711  
CTGGCTTCGATTCCATCTTCAAGAAGGAGG  
>MED12\_LsgRNA712  
ACTTCTTCTTGCCTTCCTCAGTACTGGGTG  
>MED12\_LsgRNA713  
ACTTCTTCTTGCCTTCCTCAGTACTGGGTG  
>MED12\_LsgRNA714  
GGCCCTTGCCCCATGATGTAGAGGTGGCAA  
>MED12\_LsgRNA715  
GGCCCTTGCCCCATGATGTAGAGGTGGCAA  
>MED12\_LsgRNA716  
TGGCCTTGGCGATGTTCTCCAAGAGGGAGT

>MED12\_LsgRNA717  
TGGCCTTGGCGATGTTCTCCAAGAGGGAGT  
>MED12\_LsgRNA718  
GAATCTTTGGATTGGGACCTAGCAAGGATG  
>MED12\_LsgRNA719  
GAATCTTTGGATTGGGACCTAGCAAGGATG  
>MED12\_LsgRNA720  
ACTACTTTGGGTACCTTTGAGTGGAGGTCA  
>MED12\_LsgRNA721  
ACTACTTTGGGTACCTTTGAGTGGAGGTCA  
>MED12\_LsgRNA722  
GTTGGAAAACCTCGATTGTGGCCTTGGCGA  
>MED12\_LsgRNA723  
GTTGGAAAACCTCGATTGTGGCCTTGGCGA  
>MED12\_LsgRNA724  
TCCAGAACTGCAGGAGGACATCCTGGAAA  
>MED12\_LsgRNA725  
TCCAGAACTGCAGGAGGACATCCTGGAAA  
>MED12\_LsgRNA726  
ACATGAACCTGGCGAAGAAGTTGCAGGTAA  
>MED12\_LsgRNA727  
ACATGAACCTGGCGAAGAAGTTGCAGGTAA  
>MED12\_LsgRNA728  
TTTCGAACGCACCTCCTTCTGTTTGGGGTC  
>MED12\_LsgRNA729  
TTTCGAACGCACCTCCTTCTGTTTGGGGTC  
>MED12\_LsgRNA730  
AGAAGAACTTCCAGAGGAGGAGGGAGGAGG  
>MED12\_LsgRNA731  
AACAGAAGAACTTCCAGAGGAGGAGGGAGG  
>MED12\_LsgRNA732  
AACAGAAGAACTTCCAGAGGAGGAGGGAGG  
>MED12\_LsgRNA733  
TGGAGAAGAGACAGGCGGAGATTGAGGCTG  
>MED12\_LsgRNA734  
TGGAGAAGAGACAGGCGGAGATTGAGGCTG  
>MED12\_LsgRNA735  
AGGAGAAGATTGAAGGGACCCTTGGGGTTC  
>MED12\_LsgRNA736  
AGGAGAAGATTGAAGGGACCCTTGGGGTTC  
>MED12\_LsgRNA737  
CTGAGAAGCCAGATGTCTGAGAAGGAGGTGA  
>MED12\_LsgRNA738  
CTGAGAAGCCAGATGTCTGAGAAGGAGGTGA

>MED12\_LsgRNA739  
GCAGGAAGCCCCAAGTGAACCAGAAGGATA  
>MED12\_LsgRNA740  
TGCTGAAGCCCCTGGCGCTGGAAGTGGGTG  
>MED12\_LsgRNA741  
TGCTGAAGCCCCTGGCGCTGGAAGTGGGTG  
>MED12\_LsgRNA742  
ATAAGAAGGGCTGCTGGCTCAATAGGGACA  
>MED12\_LsgRNA743  
ATAAGAAGGGCTGCTGGCTCAATAGGGACA  
>MED12\_LsgRNA744  
GGTAGAAGGGTGGGTGCTCTGGTAAGGCTG  
>MED12\_LsgRNA745  
GGTAGAAGGGTGGGTGCTCTGGTAAGGCTG  
>MED12\_LsgRNA746  
CATGGAATATTCACCTCAGCATCAGTGGCCT  
>MED12\_LsgRNA747  
CATGGAATATTCACCTCAGCATCAGTGGCCT  
>MED12\_LsgRNA748  
TGCTGAATGAACTGAGTGTAGTTGAGGCTG  
>MED12\_LsgRNA749  
TGCTGAATGAACTGAGTGTAGTTGAGGCTG  
>MED12\_LsgRNA750  
CGGGGACAGGCAGTTGAAGTTCGCTGGTCT  
>MED12\_LsgRNA751  
CGGGGACAGGCAGTTGAAGTTCGCTGGTCT  
>MED12\_LsgRNA752  
TGCAGACATGTCTAGCATCTCGCAAGGTAG  
>MED12\_LsgRNA753  
TGCAGACATGTCTAGCATCTCGCAAGGTAG  
>MED12\_LsgRNA754  
CAGGGACATGTGTTAAAGGCTGCTGGGGAA  
>MED12\_LsgRNA755  
CAGGGACATGTGTTAAAGGCTGCTGGGGAA  
>MED12\_LsgRNA756  
GCAAGACCAAGCCTGTGCTCAGGTCGGATA  
>MED12\_LsgRNA757  
GCAAGACCAAGCCTGTGCTCAGGTCGGATA  
>MED12\_LsgRNA758  
CGGGGACCAGGGGCTCCAAAGGCAAGGTCC  
>MED12\_LsgRNA759  
CGGGGACCAGGGGCTCCAAAGGCAAGGTCC  
>MED12\_LsgRNA760  
AGTGGACCATGCGCCAGTCTTCCTTGGAGC

>MED12\_LsgRNA761  
AGTGGACCATGCGCCAGTCTTCCTTGGAGC  
>MED12\_LsgRNA762  
AGGGGACCTTGCCTTTGGAGCCCCTGGTCC  
>MED12\_LsgRNA763  
AGGGGACCTTGCCTTTGGAGCCCCTGGTCC  
>MED12\_LsgRNA764  
AACGGACGCCTGCCTGGACGCCCTGGGCAC  
>MED12\_LsgRNA765  
AACGGACGCCTGCCTGGACGCCCTGGGCAC  
>MED12\_LsgRNA766  
ACAGGACGGTATGGGTCCACACGAGGGCCA  
>MED12\_LsgRNA767  
ACAGGACGGTATGGGTCCACACGAGGGCCA  
>MED12\_LsgRNA768  
CATCGACTGCTGGACAATGAGGATGGGGAA  
>MED12\_LsgRNA769  
CATCGACTGCTGGACAATGAGGATGGGGAA  
>MED12\_LsgRNA770  
ATCAGACTGGCAAGGATTGAGCTGCGGTGT  
>MED12\_LsgRNA771  
ATCAGACTGGCAAGGATTGAGCTGCGGTGT  
>MED12\_LsgRNA772  
CAAGGAGAAGATTGAAGGGACCCTTGGGGT  
>MED12\_LsgRNA773  
CAAGGAGAAGATTGAAGGGACCCTTGGGGT  
>MED12\_LsgRNA774  
AGATGAGAAGGGTTCCATCGCCTCTGGCTC  
>MED12\_LsgRNA775  
AGAAGAGACATGTTGACCCTTTCATGGGTG  
>MED12\_LsgRNA776  
AGAAGAGACATGTTGACCCTTTCATGGGTG  
>MED12\_LsgRNA777  
AAGGGAGAGGGAGGCCGGGGACCAGGGGCT  
>MED12\_LsgRNA778  
AAGGGAGAGGGAGGCCGGGGACCAGGGGCT  
>MED12\_LsgRNA779  
GATCGAGCAGCAGATCAAGGAGCGGGGACA  
>MED12\_LsgRNA780  
GATCGAGCAGCAGATCAAGGAGCGGGGACA  
>MED12\_LsgRNA781  
CCTCGAGCCACTCGCCGGTCCACTCGGACT  
>MED12\_LsgRNA782  
CCTCGAGCCACTCGCCGGTCCACTCGGACT

>MED12\_LsgRNA783  
CCAGGAGGAGCATGGCCCACTCCGTGGTCT  
>MED12\_LsgRNA784  
CCAGGAGGAGCATGGCCCACTCCGTGGTCT  
>MED12\_LsgRNA785  
TTCAGAGGCACAATAGGAGCAAGCTGGTCT  
>MED12\_LsgRNA786  
TTCAGAGGCACAATAGGAGCAAGCTGGTCT  
>MED12\_LsgRNA787  
TCCGGAGGCACTGTCACACCATAAGGGCCG  
>MED12\_LsgRNA788  
TCCGGAGGCACTGTCACACCATAAGGGCCG  
>MED12\_LsgRNA789  
GGAGGAGGTGGCAGTGGTGGTCGGAGGCAG  
>MED12\_LsgRNA790  
GGAGGAGGTGGCAGTGGTGGTCGGAGGCAG  
>MED12\_LsgRNA791  
ACAAGAGTAGGATTGGTAGAAGGGTGGGTG  
>MED12\_LsgRNA792  
ACAAGAGTAGGATTGGTAGAAGGGTGGGTG  
>MED12\_LsgRNA793  
ATGAGAGTGCAAGTATACATGTTGTGGGAG  
>MED12\_LsgRNA794  
ATGAGAGTGCAAGTATACATGTTGTGGGAG  
>MED12\_LsgRNA795  
TGTGGATAGCAAATGAGCTGCATGAGGCGC  
>MED12\_LsgRNA796  
TGTGGATAGCAAATGAGCTGCATGAGGCGC  
>MED12\_LsgRNA797  
CAAAGATATCTTCAGCAGTGGGGAAGGCTT  
>MED12\_LsgRNA798  
CAAAGATATCTTCAGCAGTGGGGAAGGCTT  
>MED12\_LsgRNA799  
CTCAGATCATCACCAAGTACTTATGGGAGC  
>MED12\_LsgRNA800  
CTCAGATCATCACCAAGTACTTATGGGAGC  
>MED12\_LsgRNA801  
TCGTGATCTGCTCCAGAACATTCCGGGAGA  
>MED12\_LsgRNA802  
TCGTGATCTGCTCCAGAACATTCCGGGAGA  
>MED12\_LsgRNA803  
ACGTGATGACATCTCGGGTCTGCTTGGGCA  
>MED12\_LsgRNA804  
ACGTGATGACATCTCGGGTCTGCTTGGGCA

>MED12\_LsgRNA805  
AGGGGATGCGGAACTGAAAGGTTTCAGGCTT  
>MED12\_LsgRNA806  
AGGGGATGCGGAACTGAAAGGTTTCAGGCTT  
>MED12\_LsgRNA807  
GGCAGATGCTGCGCAGCACGTACTTGGCAT  
>MED12\_LsgRNA808  
GGCAGATGCTGCGCAGCACGTACTTGGCAT  
>MED12\_LsgRNA809  
GCCGGATTGCCACCTCTACATCATGGGGCA  
>MED12\_LsgRNA810  
GCCGGATTGCCACCTCTACATCATGGGGCA  
>MED12\_LsgRNA811  
CAGAGATTGCTGCATAGTAGGCACAGGTCA  
>MED12\_LsgRNA812  
CAGAGATTGCTGCATAGTAGGCACAGGTCA  
>MED12\_LsgRNA813  
CTTAGCAAAGATATCTTCAGCAGTGGGGAA  
>MED12\_LsgRNA814  
CTTAGCAAAGATATCTTCAGCAGTGGGGAA  
>MED12\_LsgRNA815  
AGCAGCAAGACCAAGCCTGTGCTCAGGTCTG  
>MED12\_LsgRNA816  
AGCAGCAAGACCAAGCCTGTGCTCAGGTCTG  
>MED12\_LsgRNA817  
AGAGGCAAGTGGTATGACATGCCAAGGGCA  
>MED12\_LsgRNA818  
AGAGGCAAGTGGTATGACATGCCAAGGGCA  
>MED12\_LsgRNA819  
GAGGGCACATAAGCAGGTCACTAAAGGGAG  
>MED12\_LsgRNA820  
GAGGGCACATAAGCAGGTCACTAAAGGGAG  
>MED12\_LsgRNA821  
CGCAGCACCCAGCAGACCACGGAGTGGGCC  
>MED12\_LsgRNA822  
CGCAGCACCCAGCAGACCACGGAGTGGGCC  
>MED12\_LsgRNA823  
TGGGGCACCGCAGGTTGCTGCTGCCGGTAC  
>MED12\_LsgRNA824  
TGGGGCACCGCAGGTTGCTGCTGCCGGTAC  
>MED12\_LsgRNA825  
GGCAGCACTCCAGGGTAAGTTGGTCGGGTG  
>MED12\_LsgRNA826  
GGCAGCACTCCAGGGTAAGTTGGTCGGGTG

>MED12\_LsgRNA827  
GTCAGCAGAGACAGGGTCATCTTCTGGAAG  
>MED12\_LsgRNA828  
GTCAGCAGAGACAGGGTCATCTTCTGGAAG  
>MED12\_LsgRNA829  
AGCAGCAGATCAAGGAGCGGGGACAGGCAG  
>MED12\_LsgRNA830  
AGCAGCAGATCAAGGAGCGGGGACAGGCAG  
>MED12\_LsgRNA831  
AGCAGCAGCAACAGACAGCAGCTTTGGTCC  
>MED12\_LsgRNA832  
AGCAGCAGCAACAGACAGCAGCTTTGGTCC  
>MED12\_LsgRNA833  
ACCAGCAGCAACAGCAGCAACAGGCGGCTC  
>MED12\_LsgRNA834  
ACCAGCAGCAACAGCAGCAACAGGCGGCTC  
>MED12\_LsgRNA835  
AGCAGCAGCAGCAGCAGATCCTGCGGGTAA  
>MED12\_LsgRNA836  
AGCAGCAGCAGCAGCAGATCCTGCGGGTAA  
>MED12\_LsgRNA837  
ATCGGCAGGATCATCAAAGGGAGAGGGAGG  
>MED12\_LsgRNA838  
ATCGGCAGGATCATCAAAGGGAGAGGGAGG  
>MED12\_LsgRNA839  
AGGAGCAGGCGGCTCCTCATCTTCTGGGGG  
>MED12\_LsgRNA840  
AGGAGCAGGCGGCTCCTCATCTTCTGGGGG  
>MED12\_LsgRNA841  
CATTGCAGGTCCGTGCAAAGTTGCGGGAGA  
>MED12\_LsgRNA842  
CATTGCAGGTCCGTGCAAAGTTGCGGGAGA  
>MED12\_LsgRNA843  
ATGTGCAGTTCATCTTCGACCTCATGGAAT  
>MED12\_LsgRNA844  
ATGTGCAGTTCATCTTCGACCTCATGGAAT  
>MED12\_LsgRNA845  
CACTGCCACTGCCCCAGAAGATGAGGAGC  
>MED12\_LsgRNA846  
CACTGCCACTGCCCCAGAAGATGAGGAGC  
>MED12\_LsgRNA847  
CGAAGCCAGCAATCTTGTTGCCCTTGGTAT  
>MED12\_LsgRNA848  
CGAAGCCAGCAATCTTGTTGCCCTTGGTAT

>MED12\_LsgRNA849  
ACCGGCCAGGGCCTGCAGGAAGTGGGGGCT  
>MED12\_LsgRNA850  
ACCGGCCAGGGCCTGCAGGAAGTGGGGGCT  
>MED12\_LsgRNA851  
TGTAGCCATTTAAAGAACAAATTTGGGGAG  
>MED12\_LsgRNA852  
TGTAGCCATTTAAAGAACAAATTTGGGGAG  
>MED12\_LsgRNA853  
TGGTGCCCCACACAGACGTGCATAAGGGCA  
>MED12\_LsgRNA854  
TGGTGCCCCACACAGACGTGCATAAGGGCA  
>MED12\_LsgRNA855  
GGAGGCCCCAGCCGCGGCCGCTTCAGGGGC  
>MED12\_LsgRNA856  
GGAGGCCCCAGCCGCGGCCGCTTCAGGGGC  
>MED12\_LsgRNA857  
CAGAGCCCCCAAACACTGACAAAACCGGGGG  
>MED12\_LsgRNA858  
CAGAGCCCCCAAACACTGACAAAACCGGGGG  
>MED12\_LsgRNA859  
ACCGGCCCTGAAGCGGCCGCGGCTGGGGC  
>MED12\_LsgRNA860  
ACCGGCCCTGAAGCGGCCGCGGCTGGGGC  
>MED12\_LsgRNA861  
TAGGGCCCTTGCCCCATGATGTAGAGGTGG  
>MED12\_LsgRNA862  
TAGGGCCCTTGCCCCATGATGTAGAGGTGG  
>MED12\_LsgRNA863  
CCCAGCCGCGGCCGCTTCAGGGGCCGCTGT  
>MED12\_LsgRNA864  
CCCAGCCGCGGCCGCTTCAGGGGCCGCTGT  
>MED12\_LsgRNA865  
CGGGGCCGGGCCTCAGGTGTGTGTGGTAG  
>MED12\_LsgRNA866  
CGGGGCCGGGCCTCAGGTGTGTGTGGTAG  
>MED12\_LsgRNA867  
TGAAGCCGTCAGCACCACTCTCTTGGGGCT  
>MED12\_LsgRNA868  
TGAAGCCGTCAGCACCACTCTCTTGGGGCT  
>MED12\_LsgRNA869  
TCTTGCCTAGCCCCGTGTAGGTGAAGGTGT  
>MED12\_LsgRNA870  
TCTTGCCTAGCCCCGTGTAGGTGAAGGTGT



>MED12\_LsgRNA871  
GAGTGCCTCATGCATAAGCTGCTTTGGTTT  
>MED12\_LsgRNA872  
GAGTGCCTCATGCATAAGCTGCTTTGGTTT  
>MED12\_LsgRNA873  
TGGGGCCTCCCGATGTTTACCCTCAGGACC  
>MED12\_LsgRNA874  
TGGGGCCTCCCGATGTTTACCCTCAGGACC  
>MED12\_LsgRNA875  
CTGCGCCTGGGCACTACTCAAACTGGGTC  
>MED12\_LsgRNA876  
CTGCGCCTGGGCACTACTCAAACTGGGTC  
>MED12\_LsgRNA877  
TGCAGCGCAGCACCCAGCAGACCACGGAGT  
>MED12\_LsgRNA878  
GGCAGCGCATAAAGCGCATTCTCCAGGTAG  
>MED12\_LsgRNA879  
GGCAGCGCATAAAGCGCATTCTCCAGGTAG  
>MED12\_LsgRNA880  
GACAGCGCCTTCGCCAACAGCTCCAGGCAA  
>MED12\_LsgRNA881  
GACAGCGCCTTCGCCAACAGCTCCAGGCAA  
>MED12\_LsgRNA882  
TACAGCGCTCTGCAGAGGAGCCATCGGACC  
>MED12\_LsgRNA883  
TACAGCGCTCTGCAGAGGAGCCATCGGACC  
>MED12\_LsgRNA884  
GAATGCGCTTTATGCGCTGCCGCTGGGGGT  
>MED12\_LsgRNA885  
GAATGCGCTTTATGCGCTGCCGCTGGGGGT  
>MED12\_LsgRNA886  
ACCAGCGGTTGGTCGTACTGTTTGGGGTGG  
>MED12\_LsgRNA887  
AGTAGCGTCCAAATATGTTGGTACTGGGCT  
>MED12\_LsgRNA888  
AGTAGCGTCCAAATATGTTGGTACTGGGCT  
>MED12\_LsgRNA889  
TGGTGCTAACATGTCTGAAAGGGCAGGATG  
>MED12\_LsgRNA890  
TGGTGCTAACATGTCTGAAAGGGCAGGATG  
>MED12\_LsgRNA891  
AGCAGCTACCTGGGGCTGGGACTGGGGCTG  
>MED12\_LsgRNA892  
AGCAGCTACCTGGGGCTGGGACTGGGGCTG

>MED12\_LsgRNA893  
GACTGCTCACACCATCCAGCTGCAGGGCCA  
>MED12\_LsgRNA894  
TGCAGCTCACACCTTACCTACACGGGGCT  
>MED12\_LsgRNA895  
TGCAGCTCACACCTTACCTACACGGGGCT  
>MED12\_LsgRNA896  
TGTGGCTCACACGTGATGACATCTCGGGTC  
>MED12\_LsgRNA897  
TGTGGCTCACACGTGATGACATCTCGGGTC  
>MED12\_LsgRNA898  
ATGAGCTGCATGAGGCGCTGCGCCTGGGCA  
>MED12\_LsgRNA899  
ATGAGCTGCATGAGGCGCTGCGCCTGGGCA  
>MED12\_LsgRNA900  
ACGTGCTGCGCAGCATCTGCCAACAGGTCA  
>MED12\_LsgRNA901  
ACGTGCTGCGCAGCATCTGCCAACAGGTCA  
>MED12\_LsgRNA902  
GCTGGCTGCGTTTCTTGCCCTTGGTGGACT  
>MED12\_LsgRNA903  
GCTGGCTGCGTTTCTTGCCCTTGGTGGACT  
>MED12\_LsgRNA904  
TGCTGCTGCTGCTGCTGCCGGATGTGGTAC  
>MED12\_LsgRNA905  
TGCTGCTGCTGCTGCTGCCGGATGTGGTAC  
>MED12\_LsgRNA906  
TGCTGCTGCTGCTGCTGCTCAGGTAGGATG  
>MED12\_LsgRNA907  
TGCTGCTGCTGCTGCTGCTCAGGTAGGATG  
>MED12\_LsgRNA908  
AGAAGCTGGCCATGTTTCATGTTTCAGGTAG  
>MED12\_LsgRNA909  
AGAAGCTGGCCATGTTTCATGTTTCAGGTAG  
>MED12\_LsgRNA910  
TGCTGCTGGGTCTGCTGAAGCCCCTGGCGC  
>MED12\_LsgRNA911  
TGCTGCTGGGTCTGCTGAAGCCCCTGGCGC  
>MED12\_LsgRNA912  
ATGGGCTGTCAGCTGCAAGCGTTCTGGTTCG  
>MED12\_LsgRNA913  
ATGGGCTGTCAGCTGCAAGCGTTCTGGTTCG  
>MED12\_LsgRNA914  
CTGTGCTGTCCTAGTGCCTTGGTTTGGCAC

>MED12\_LsgRNA915  
GCCTGCTGTCTCTGGGGATGAGCATGGCAG  
>MED12\_LsgRNA916  
GCCTGCTGTCTCTGGGGATGAGCATGGCAG  
>MED12\_LsgRNA917  
AGCTGCTTCTCAAATCCTCGGATCTGGTGG  
>MED12\_LsgRNA918  
AGCTGCTTCTCAAATCCTCGGATCTGGTGG  
>MED12\_LsgRNA919  
GTCTGCTTGGGCAGTGGCAGCAGCTGGCGA  
>MED12\_LsgRNA920  
GTCTGCTTGGGCAGTGGCAGCAGCTGGCGA  
>MED12\_LsgRNA921  
ATGCGCTTTATGCGCTGCCGCTGGGGTTT  
>MED12\_LsgRNA922  
CTATGGAATGGGCCCGGGTCCGAGCGGCC  
>MED12\_LsgRNA923  
CTATGGAATGGGCCCGGGTCCGAGCGGCC  
>MED12\_LsgRNA924  
CCAGGGACATGTGTTAAAGGCTGCTGGGGA  
>MED12\_LsgRNA925  
CCAGGGACATGTGTTAAAGGCTGCTGGGGA  
>MED12\_LsgRNA926  
GAACGGACGCCTGCCTGGACGCCCTGGGCA  
>MED12\_LsgRNA927  
GAACGGACGCCTGCCTGGACGCCCTGGGCA  
>MED12\_LsgRNA928  
CACAGGACGGTATGGGTCCACACGAGGGCC  
>MED12\_LsgRNA929  
CACAGGACGGTATGGGTCCACACGAGGGCC  
>MED12\_LsgRNA930  
GGATGGACTGCCCTTCCCCTCACAGGGCAT  
>MED12\_LsgRNA931  
GGATGGACTGCCCTTCCCCTCACAGGGCAT  
>MED12\_LsgRNA932  
AAAGGGAGAGGGAGGCCGGGGACCAGGGGC  
>MED12\_LsgRNA933  
AAAGGGAGAGGGAGGCCGGGGACCAGGGGC  
>MED12\_LsgRNA934  
TGCGGGAGATCGAGCAGCAGATCAAGGAGC  
>MED12\_LsgRNA935  
TGCGGGAGATCGAGCAGCAGATCAAGGAGC  
>MED12\_LsgRNA936  
TGGGGGAGCGCCAGTCAGACAGTCTGGAAA

>MED12\_LsgRNA937  
TGGGGGAGCGCCAGTCAGACAGTCTGGAAA  
>MED12\_LsgRNA938  
GTCCGGAGGCACTGTCACACCATAAGGGCC  
>MED12\_LsgRNA939  
GTCCGGAGGCACTGTCACACCATAAGGGCC  
>MED12\_LsgRNA940  
CGGGGAGGCGCTCACCTCTGTCTTGGTAG  
>MED12\_LsgRNA941  
GAGTGGAGGTCAGTCCATGTCCATAGGTGG  
>MED12\_LsgRNA942  
GAGTGGAGGTCAGTCCATGTCCATAGGTGG  
>MED12\_LsgRNA943  
AGAAGGAGGTGAAGCCCCACCCAAGGAGA  
>MED12\_LsgRNA944  
AGAAGGAGGTGAAGCCCCACCCAAGGAGA  
>MED12\_LsgRNA945  
GGCTGGAGTAGCTGGGGGCACCATGGTAC  
>MED12\_LsgRNA946  
GGCTGGAGTAGCTGGGGGCACCATGGTAC  
>MED12\_LsgRNA947  
CATTGGAGTCATGGTACTTATCATGGGTGT  
>MED12\_LsgRNA948  
CATTGGAGTCATGGTACTTATCATGGGTGT  
>MED12\_LsgRNA949  
CCACGGAGTGGGCCATGCTCCTCCTGGAGA  
>MED12\_LsgRNA950  
CCACGGAGTGGGCCATGCTCCTCCTGGAGA  
>MED12\_LsgRNA951  
GGCAGGATCATCAAAGGGAGAGGGAGGCCG  
>MED12\_LsgRNA952  
TTCGGGATCTTGAGCTACGAACACCGGCC  
>MED12\_LsgRNA953  
TTCGGGATCTTGAGCTACGAACACCGGCC  
>MED12\_LsgRNA954  
TCCAGGATGTCCTCCTGCAGTTTCTGGATA  
>MED12\_LsgRNA955  
TCCAGGATGTCCTCCTGCAGTTTCTGGATA  
>MED12\_LsgRNA956  
TGCCGGATTGCCACCTCTACATCATGGGGC  
>MED12\_LsgRNA957  
TGCCGGATTGCCACCTCTACATCATGGGGC  
>MED12\_LsgRNA958  
CTTTGGATTGGGACCTAGCAAGGATGGGCA

>MED12\_LsgRNA959  
CTTTGGATTGGGACCTAGCAAGGATGGGCA  
>MED12\_LsgRNA960  
TCCAGGCACTACTCACATTGTTAGGGGTCT  
>MED12\_LsgRNA961  
TGAAGGCACTGTTACCCTCTGGCATGGGCA  
>MED12\_LsgRNA962  
TGAAGGCACTGTTACCCTCTGGCATGGGCA  
>MED12\_LsgRNA963  
GATGGGCAGAAGCGGCGACGCAACCGGCCT  
>MED12\_LsgRNA964  
GATGGGCAGAAGCGGCGACGCAACCGGCCT  
>MED12\_LsgRNA965  
TGTGGGCAGCACTCCAGGGTAAGTTGGTTCG  
>MED12\_LsgRNA966  
TGTGGGCAGCACTCCAGGGTAAGTTGGTTCG  
>MED12\_LsgRNA967  
CATCGGCAGGATCATCAAAGGGAGAGGGAG  
>MED12\_LsgRNA968  
CATCGGCAGGATCATCAAAGGGAGAGGGAG  
>MED12\_LsgRNA969  
AGGTGGCAGTGGTGGTTCGGAGGCAGGGTGG  
>MED12\_LsgRNA970  
AGGTGGCAGTGGTGGTTCGGAGGCAGGGTGG  
>MED12\_LsgRNA971  
TACCGGCCAGGGCCTGCAGGAAGTGGGGGC  
>MED12\_LsgRNA972  
TACCGGCCAGGGCCTGCAGGAAGTGGGGGC  
>MED12\_LsgRNA973  
GCATGGCCCACTCCGTGGTCTGCTGGGTGC  
>MED12\_LsgRNA974  
GCATGGCCCACTCCGTGGTCTGCTGGGTGC  
>MED12\_LsgRNA975  
AGCAGGCGGCTCCTCATCTTCTGGGGGCAG  
>MED12\_LsgRNA976  
AGCAGGCGGCTCCTCATCTTCTGGGGGCAG  
>MED12\_LsgRNA977  
TTTTGGCTAGTTGCGTGAGTGGCTTGGTGC  
>MED12\_LsgRNA978  
TTTTGGCTAGTTGCGTGAGTGGCTTGGTGC  
>MED12\_LsgRNA979  
CAGTGGCTCCAGGTAATAGGCGCGGGGCCG  
>MED12\_LsgRNA980  
CAGTGGCTCCAGGTAATAGGCGCGGGGCCG

>MED12\_LsgRNA981  
ACAGGGCTCCCTTATCGATAACCAAGGGCAA  
>MED12\_LsgRNA982  
ACAGGGCTCCCTTATCGATAACCAAGGGCAA  
>MED12\_LsgRNA983  
CTCAGGCTCTAGCAGGGTAGGAGCAGGCGG  
>MED12\_LsgRNA984  
CTCAGGCTCTAGCAGGGTAGGAGCAGGCGG  
>MED12\_LsgRNA985  
CGGGGGCTGCTCCACCCAGTACTGAGGAAC  
>MED12\_LsgRNA986  
CGGGGGCTGCTCCACCCAGTACTGAGGAAC  
>MED12\_LsgRNA987  
GTAAGGCTGGCTGGAGTAGCTGGGGGGCAC  
>MED12\_LsgRNA988  
GTAAGGCTGGCTGGAGTAGCTGGGGGGCAC  
>MED12\_LsgRNA989  
TTGGGGCTTCCTGCGACCAGTGTTCAGGAAG  
>MED12\_LsgRNA990  
TTGGGGCTTCCTGCGACCAGTGTTCAGGAAG  
>MED12\_LsgRNA991  
CACAGGCTTGGTCTTGCTGCTGCTGGGCAT  
>MED12\_LsgRNA992  
CACAGGCTTGGTCTTGCTGCTGCTGGGCAT  
>MED12\_LsgRNA993  
GCTGGGAATAGTACCTGGGGGATGGGAAA  
>MED12\_LsgRNA994  
GCTGGGAATAGTACCTGGGGGATGGGAAA  
>MED12\_LsgRNA995  
AAATGGGAGCACTGGGAGCAGAAAGGGAGC  
>MED12\_LsgRNA996  
AAATGGGAGCACTGGGAGCAGAAAGGGAGC  
>MED12\_LsgRNA997  
CACTGGGAGCAGAAAGGGAGCCAGAGGCGA  
>MED12\_LsgRNA998  
CACTGGGAGCAGAAAGGGAGCCAGAGGCGA  
>MED12\_LsgRNA999  
TTCTGGGAGGCAGCCAGCAGGTGGCGGTTCG  
>MED12\_LsgRNA1000  
GAAAGGGCAGGATGAACAACGCGAGGGACT  
>MED12\_LsgRNA1001  
GAAAGGGCAGGATGAACAACGCGAGGGACT  
>MED12\_LsgRNA1002  
AGGTGGGCAGTTTAGCAATGAGGGGGGCCA

>MED12\_LsgRNA1003  
AGGTGGGCAGTTTAGCAATGAGGGGGGCCA  
>MED12\_LsgRNA1004  
CACTGGGCCGCTGTTGCAGGTGGCGGGTAG  
>MED12\_LsgRNA1005  
CACTGGGCCGCTGTTGCAGGTGGCGGGTAG  
>MED12\_LsgRNA1006  
CCCAGGGCGAGATCTTCTGTTTGGTGGAAA  
>MED12\_LsgRNA1007  
CCCAGGGCGAGATCTTCTGTTTGGTGGAAA  
>MED12\_LsgRNA1008  
CACAGGGCTCCCTTATCGATAACCAAGGGCA  
>MED12\_LsgRNA1009  
CACAGGGCTCCCTTATCGATAACCAAGGGCA  
>MED12\_LsgRNA1010  
TGCTGGGGAATAGTACCTGGGGGATGGGAA  
>MED12\_LsgRNA1011  
TGCTGGGGAATAGTACCTGGGGGATGGGAA  
>MED12\_LsgRNA1012  
CTGGGGGCACCATGGTACCTGCAGGGCCT  
>MED12\_LsgRNA1013  
CTGGGGGCACCATGGTACCTGCAGGGCCT  
>MED12\_LsgRNA1014  
TCTGGGGCAGTGGCAGTGGCTCCAGGTAA  
>MED12\_LsgRNA1015  
TCTGGGGCAGTGGCAGTGGCTCCAGGTAA  
>MED12\_LsgRNA1016  
GTGTGGGGCCTCTATCACAGAACTTGGACC  
>MED12\_LsgRNA1017  
AGTGGGGCTGTGGTTCCACGATAGGGCCC  
>MED12\_LsgRNA1018  
AGTGGGGCTGTGGTTCCACGATAGGGCCC  
>MED12\_LsgRNA1019  
GCTGGGGGCACCATGGTACCTGCAGGGCC  
>MED12\_LsgRNA1020  
GCTGGGGGCACCATGGTACCTGCAGGGCC  
>MED12\_LsgRNA1021  
AAGTGGGGCTGTGGTTCCACGATAGGGCC  
>MED12\_LsgRNA1022  
AAGTGGGGCTGTGGTTCCACGATAGGGCC  
>MED12\_LsgRNA1023  
GTTTGGGGTCCTGAGGGTAAACATCGGGAG  
>MED12\_LsgRNA1024  
GTTTGGGGTCCTGAGGGTAAACATCGGGAG

>MED12\_LsgRNA1025  
TTTGGGGTCCTGAGGGTAAACATCGGGAGG  
>MED12\_LsgRNA1026  
GGCAGGGTGGCCGCAACATCTCTGTGGAGA  
>MED12\_LsgRNA1027  
GGCAGGGTGGCCGCAACATCTCTGTGGAGA  
>MED12\_LsgRNA1028  
GTTTGGGTGGTGCAGGAGGTCCGGAGGCAC  
>MED12\_LsgRNA1029  
GTTTGGGTGGTGCAGGAGGTCCGGAGGCAC  
>MED12\_LsgRNA1030  
CATTGGTAAGCGCACAGGACGGTATGGGTC  
>MED12\_LsgRNA1031  
CATTGGTAAGCGCACAGGACGGTATGGGTC  
>MED12\_LsgRNA1032  
TGGAGGTCAGTCCATGTCCATAGGTGGGGG  
>MED12\_LsgRNA1033  
TGGAGGTCAGTCCATGTCCATAGGTGGGGG  
>MED12\_LsgRNA1034  
TGTTGGTCATAATGTGAAAGGTGCTGGAAC  
>MED12\_LsgRNA1035  
TGTTGGTCATAATGTGAAAGGTGCTGGAAC  
>MED12\_LsgRNA1036  
CAAGGGTCCCTTCAATCTTCTCCTTGGGTG  
>MED12\_LsgRNA1037  
CAAGGGTCCCTTCAATCTTCTCCTTGGGTG  
>MED12\_LsgRNA1038  
GGTGGGTGCTCTGGTAAGGCTGGCTGGAGT  
>MED12\_LsgRNA1039  
GGTGGGTGCTCTGGTAAGGCTGGCTGGAGT  
>MED12\_LsgRNA1040  
GGCCGGTGCTGAGGGCACATAAGCAGGTCA  
>MED12\_LsgRNA1041  
GGCCGGTGCTGAGGGCACATAAGCAGGTCA  
>MED12\_LsgRNA1042  
AGCAGGTGGCGGTTCGAGGAGGAGCGGATT  
>MED12\_LsgRNA1043  
AGCAGGTGGCGGTTCGAGGAGGAGCGGATT  
>MED12\_LsgRNA1044  
CTGAGGTGGGCAGTTTAGCAATGAGGGGGG  
>MED12\_LsgRNA1045  
AGCGGGTGGGGATGCTTTACTTGTGGACT  
>MED12\_LsgRNA1046  
AGCGGGTGGGGATGCTTTACTTGTGGACT



>MED12\_LsgRNA1047  
GGCAGGTGGGGGCATGTTTGACACGGTGC  
>MED12\_LsgRNA1048  
GGCAGGTGGGGGCATGTTTGACACGGTGC  
>MED12\_LsgRNA1049  
GAAGGGTGGGTGCTCTGGTAAGGCTGGCTG  
>MED12\_LsgRNA1050  
GAAGGGTGGGTGCTCTGGTAAGGCTGGCTG  
>MED12\_LsgRNA1051  
CTGTGGTGTCAATTGCTATGTGAATGGGCTG  
>MED12\_LsgRNA1052  
CTGTGGTGTCAATTGCTATGTGAATGGGCTG  
>MED12\_LsgRNA1053  
GAAAGGTTCAAGCTTCACTGTGACAGGAGG  
>MED12\_LsgRNA1054  
GAAAGGTTCAAGCTTCACTGTGACAGGAGG  
>MED12\_LsgRNA1055  
TTCAGTAAGAAGGAAGAGGTGTTTGGGTAC  
>MED12\_LsgRNA1056  
ATTGGTAAGCGCACAGGACGGTATGGGTCC  
>MED12\_LsgRNA1057  
ATTGGTAAGCGCACAGGACGGTATGGGTCC  
>MED12\_LsgRNA1058  
TCTGGTAAGGCTGGCTGGAGTAGCTGGGGG  
>MED12\_LsgRNA1059  
TCTGGTAAGGCTGGCTGGAGTAGCTGGGGG  
>MED12\_LsgRNA1060  
GCCCGTACACAGAGGTCTTATAAGAGGAGG  
>MED12\_LsgRNA1061  
GCCCGTACACAGAGGTCTTATAAGAGGAGG  
>MED12\_LsgRNA1062  
CTCAGTACTGGGTGGAGCAGCCCCGGTTT  
>MED12\_LsgRNA1063  
CTCAGTACTGGGTGGAGCAGCCCCGGTTT  
>MED12\_LsgRNA1064  
TAGTGTAGCTGCCACCAGATCCGAGGATT  
>MED12\_LsgRNA1065  
TAGTGTAGCTGCCACCAGATCCGAGGATT  
>MED12\_LsgRNA1066  
CTTGGTATCGATAAGGGAGCCCTGTGGCTC  
>MED12\_LsgRNA1067  
CTTGGTATCGATAAGGGAGCCCTGTGGCTC  
>MED12\_LsgRNA1068  
CAGGGTCACTTACTTCCATCAGACTGGCAA

>MED12\_LsgRNA1069  
CAGGGTCACTTACTTCCATCAGACTGGCAA  
>MED12\_LsgRNA1070  
GAATGTCAGGTCTCCAGGATTCAGAGGCAC  
>MED12\_LsgRNA1071  
GAATGTCAGGTCTCCAGGATTCAGAGGCAC  
>MED12\_LsgRNA1072  
GGAGGTCAGTCCATGTCCATAGGTGGGGGC  
>MED12\_LsgRNA1073  
GGAGGTCAGTCCATGTCCATAGGTGGGGGC  
>MED12\_LsgRNA1074  
CCAAGTCAGTGAACCAAGTGTAAATGGCAC  
>MED12\_LsgRNA1075  
CCAAGTCAGTGAACCAAGTGTAAATGGCAC  
>MED12\_LsgRNA1076  
CTGGGTCATCGGCAGGATCATCAAAGGGAG  
>MED12\_LsgRNA1077  
CTGGGTCATCGGCAGGATCATCAAAGGGAG  
>MED12\_LsgRNA1078  
TGTAGTCCAGCAGCTACCTGGGGCTGGGAC  
>MED12\_LsgRNA1079  
TGTAGTCCAGCAGCTACCTGGGGCTGGGAC  
>MED12\_LsgRNA1080  
CCATGTCCATAGGTGGGGCCTGCTGGTGC  
>MED12\_LsgRNA1081  
CCATGTCCATAGGTGGGGCCTGCTGGTGC  
>MED12\_LsgRNA1082  
AACTGTCCCCTCAGGTGGGGAGGATGGGCA  
>MED12\_LsgRNA1083  
AACTGTCCCCTCAGGTGGGGAGGATGGGCA  
>MED12\_LsgRNA1084  
AAGGGTCCCTTCAATCTTCTCCTTGGGTGG  
>MED12\_LsgRNA1085  
AAGGGTCCCTTCAATCTTCTCCTTGGGTGG  
>MED12\_LsgRNA1086  
TCTGGTCCCTGGTTGAGGATGAGGCAGGCAT  
>MED12\_LsgRNA1087  
GGGAGTCGAGGGTGTGCTGCTAGTTGGGGG  
>MED12\_LsgRNA1088  
GGGAGTCGAGGGTGTGCTGCTAGTTGGGGG  
>MED12\_LsgRNA1089  
GATGGTCGTGTCTTACAGTACTCTGGGGA  
>MED12\_LsgRNA1090  
GATGGTCGTGTCTTACAGTACTCTGGGGA

>MED12\_LsgRNA1091  
CCAAGTCTCACATCAACATTGCAGAGGAGA  
>MED12\_LsgRNA1092  
CCAAGTCTCACATCAACATTGCAGAGGAGA  
>MED12\_LsgRNA1093  
TACTGTGAGGTACCTAAGAATGTCAGGTCT  
>MED12\_LsgRNA1094  
TACTGTGAGGTACCTAAGAATGTCAGGTCT  
>MED12\_LsgRNA1095  
GAACGTGATCGACAAAAGCAGAAGAGGTAA  
>MED12\_LsgRNA1096  
GAACGTGATCGACAAAAGCAGAAGAGGTAA  
>MED12\_LsgRNA1097  
CTTGGTGATGATCTGAGTCCATTCTGGAGG  
>MED12\_LsgRNA1098  
CTTGGTGATGATCTGAGTCCATTCTGGAGG  
>MED12\_LsgRNA1099  
CCTGGTGCACCTGGCTGTAGAGGGAGGTAA  
>MED12\_LsgRNA1100  
CCTGGTGCACCTGGCTGTAGAGGGAGGTAA  
>MED12\_LsgRNA1101  
ACCTGTGCCATCTGGTCCTGGTTGAGGATG  
>MED12\_LsgRNA1102  
ACCTGTGCCATCTGGTCCTGGTTGAGGATG  
>MED12\_LsgRNA1103  
TTATGTGCCCTCAGCACCGGCCCTGGTTT  
>MED12\_LsgRNA1104  
TTATGTGCCCTCAGCACCGGCCCTGGTTT  
>MED12\_LsgRNA1105  
TCCTGTGCCTGCAGAAGGAGTTGGGGGAGC  
>MED12\_LsgRNA1106  
TCCTGTGCCTGCAGAAGGAGTTGGGGGAGC  
>MED12\_LsgRNA1107  
TGGAGTGCTGCCCACAACCATGACTGGCGT  
>MED12\_LsgRNA1108  
TGGAGTGCTGCCCACAACCATGACTGGCGT  
>MED12\_LsgRNA1109  
GGGTGTGCTGCTAGTTGGGGGCTGAGGAGC  
>MED12\_LsgRNA1110  
GGGTGTGCTGCTAGTTGGGGGCTGAGGAGC  
>MED12\_LsgRNA1111  
CCGAGTGGACCGGCGAGTGGCTCGAGGAGA  
>MED12\_LsgRNA1112  
CCGAGTGGACCGGCGAGTGGCTCGAGGAGA

>MED12\_LsgRNA1113  
GGCAGTGGCTCCAGGTAATAGGCGCGGGGC  
>MED12\_LsgRNA1114  
GGCAGTGGCTCCAGGTAATAGGCGCGGGGC  
>MED12\_LsgRNA1115  
GGTAGTGGCTGGTTCTGGGTGTACAGGCCT  
>MED12\_LsgRNA1116  
GGTAGTGGCTGGTTCTGGGTGTACAGGCCT  
>MED12\_LsgRNA1117  
GGCAGTGGGATTACACCGAGAAGCTGGCCA  
>MED12\_LsgRNA1118  
GGCAGTGGGATTACACCGAGAAGCTGGCCA  
>MED12\_LsgRNA1119  
TCATGTGGGATTGCAGCAACACACAGGCC  
>MED12\_LsgRNA1120  
TCATGTGGGATTGCAGCAACACACAGGCC  
>MED12\_LsgRNA1121  
TCAGGTGGGGAGGATGGGCAGAAGCGGCGA  
>MED12\_LsgRNA1122  
TCAGGTGGGGAGGATGGGCAGAAGCGGCGA  
>MED12\_LsgRNA1123  
AGGTGTGTTATAGAACCAGGGTTTGGGTGG  
>MED12\_LsgRNA1124  
AGGTGTGTTATAGAACCAGGGTTTGGGTGG  
>MED12\_LsgRNA1125  
ACATGTTAGCACCAGCGATAAGAAGGGCTG  
>MED12\_LsgRNA1126  
ACATGTTAGCACCAGCGATAAGAAGGGCTG  
>MED12\_LsgRNA1127  
AGAAGTTATCCTTCTGGTTCACCTGGGGCT  
>MED12\_LsgRNA1128  
AGAAGTTATCCTTCTGGTTCACCTGGGGCT  
>MED12\_LsgRNA1129  
TTATGTTCTATGCCCTCAGGATCCAGGGCT  
>MED12\_LsgRNA1130  
TTATGTTCTATGCCCTCAGGATCCAGGGCT  
>MED12\_LsgRNA1131  
GCTGGTTCTGGGTGTACAGGCCTATGGAGC  
>MED12\_LsgRNA1132  
GCTGGTTCTGGGTGTACAGGCCTATGGAGC  
>MED12\_LsgRNA1133  
TCTTGTGCCCCTTGGTATCGATAAAGGGAGC  
>MED12\_LsgRNA1134  
TCTTGTGCCCCTTGGTATCGATAAAGGGAGC

>MED12\_LsgRNA1135  
AGCTGTTGGCGAAGGCGCTGTCCTTGGGGC  
>MED12\_LsgRNA1136  
AGCTGTTGGCGAAGGCGCTGTCCTTGGGGC  
>MED12\_LsgRNA1137  
ATATGTTGGTACTGGGCTGTGGCTGGGTAT  
>MED12\_LsgRNA1138  
ATATGTTGGTACTGGGCTGTGGCTGGGTAT  
>MED12\_LsgRNA1139  
AGCGGTTGGTCGTA CTGTTTGGGGTGGGAA  
>MED12\_LsgRNA1140  
AGCGGTTGGTCGTA CTGTTTGGGGTGGGAA  
>MED12\_LsgRNA1141  
ACTTGTGTGGCCCTGGCAGGTGGGGGGCA  
>MED12\_LsgRNA1142  
TTTGGTTTGCAATCATCTAAGTACTGGTCA  
>MED12\_LsgRNA1143  
TTTGGTTTGCAATCATCTAAGTACTGGTCA  
>MED12\_LsgRNA1144  
GTTCTAAACCCATGACGCCAGTCATGGTTG  
>MED12\_LsgRNA1145  
GTTCTAAACCCATGACGCCAGTCATGGTTG  
>MED12\_LsgRNA1146  
CCATTAACACTTGGTTCACTGACTTGGCTG  
>MED12\_LsgRNA1147  
CCATTAACACTTGGTTCACTGACTTGGCTG  
>MED12\_LsgRNA1148  
AGGGTAACAGTGCCTTCACTCAGCAGGTAT  
>MED12\_LsgRNA1149  
AGGGTAACAGTGCCTTCACTCAGCAGGTAT  
>MED12\_LsgRNA1150  
TCAATAACCAGCCTGCTGTCTCTGGGGATG  
>MED12\_LsgRNA1151  
TCAATAACCAGCCTGCTGTCTCTGGGGATG  
>MED12\_LsgRNA1152  
TCTGTA ACTGCTCCCATAAGTACTTGGTGA  
>MED12\_LsgRNA1153  
TCTGTA ACTGCTCCCATAAGTACTTGGTGA  
>MED12\_LsgRNA1154  
CTGGTAAGGCTGGCTGGAGTAGCTGGGGGG  
>MED12\_LsgRNA1155  
CTGGTAAGGCTGGCTGGAGTAGCTGGGGGG  
>MED12\_LsgRNA1156  
TAGTTAAGGTGTGTTATAGAACCAGGGTTT

>MED12\_LsgRNA1157  
TAGTTAAGGTGTGTTATAGAACCAGGGTTT  
>MED12\_LsgRNA1158  
AGGATACAGCTGAGGCCAAAAACCAGGGGC  
>MED12\_LsgRNA1159  
ATAGTACCTGGGGGATGGGAAAATGGGTGG  
>MED12\_LsgRNA1160  
ATAGTACCTGGGGGATGGGAAAATGGGTGG  
>MED12\_LsgRNA1161  
TGAATACTACCGCCAGGGCCTGCAGGAAG  
>MED12\_LsgRNA1162  
TGAATACTACCGCCAGGGCCTGCAGGAAG  
>MED12\_LsgRNA1163  
CCCCTACTATGCCCTGTGAGGGGAAGGGCA  
>MED12\_LsgRNA1164  
CCCCTACTATGCCCTGTGAGGGGAAGGGCA  
>MED12\_LsgRNA1165  
GCACTACTCAACACTGGGTCTTGCAGGTCA  
>MED12\_LsgRNA1166  
GCACTACTCAACACTGGGTCTTGCAGGTCA  
>MED12\_LsgRNA1167  
GCTATACTCCTTATGTTTCTCATGTGGGAT  
>MED12\_LsgRNA1168  
GCTATACTCCTTATGTTTCTCATGTGGGAT  
>MED12\_LsgRNA1169  
GATGTAGAGGTGGCAATCCGGCAGTGGGAT  
>MED12\_LsgRNA1170  
GATGTAGAGGTGGCAATCCGGCAGTGGGAT  
>MED12\_LsgRNA1171  
CCTTTAGCAGAGTCAGGGCATGTTGGGACA  
>MED12\_LsgRNA1172  
CCTTTAGCAGAGTCAGGGCATGTTGGGACA  
>MED12\_LsgRNA1173  
TGTCTAGCATCTCGCAAGGTAGCATGGAGG  
>MED12\_LsgRNA1174  
TGTCTAGCATCTCGCAAGGTAGCATGGAGG  
>MED12\_LsgRNA1175  
TTGCTAGGTCCCAATCCAAAGATTCGGTTA  
>MED12\_LsgRNA1176  
TTGCTAGGTCCCAATCCAAAGATTCGGTTA  
>MED12\_LsgRNA1177  
CGTGTAGGTGAAGGTGTGAGCTGCAGGGTT  
>MED12\_LsgRNA1178  
CGTGTAGGTGAAGGTGTGAGCTGCAGGGTT

>MED12\_LsgRNA1179  
TGAGTAGTGCCAAACCAAGGCACTAGGACA  
>MED12\_LsgRNA1180  
TGAGTAGTGCCAAACCAAGGCACTAGGACA  
>MED12\_LsgRNA1181  
ACCCTAGTTCCAGTGTCTCTTTGAGGACA  
>MED12\_LsgRNA1182  
ACCCTAGTTCCAGTGTCTCTTTGAGGACA  
>MED12\_LsgRNA1183  
CTGCTAGTTGGGGGCTGAGGAGCAGGGGTG  
>MED12\_LsgRNA1184  
TTTCTATTCTAGATTGTGAATAATTGGCGA  
>MED12\_LsgRNA1185  
TTTCTATTCTAGATTGTGAATAATTGGCGA  
>MED12\_LsgRNA1186  
GTCCTCAAAGAGAACACTGGAACACTAGGGTC  
>MED12\_LsgRNA1187  
GTCCTCAAAGAGAACACTGGAACACTAGGGTC  
>MED12\_LsgRNA1188  
ATCATCAAAGGGAGAGGGAGGCCGGGGACC  
>MED12\_LsgRNA1189  
ATCATCAAAGGGAGAGGGAGGCCGGGGACC  
>MED12\_LsgRNA1190  
CCCTTCAATCTTCTCCTTGGGTGGGGGCTT  
>MED12\_LsgRNA1191  
CCCTTCAATCTTCTCCTTGGGTGGGGGCTT  
>MED12\_LsgRNA1192  
ATCTTCAGCAGTGGGGAAGGCTTCAGGCCG  
>MED12\_LsgRNA1193  
ATCTTCAGCAGTGGGGAAGGCTTCAGGCCG  
>MED12\_LsgRNA1194  
ACCCTCAGGACCCCAAACAGAAGGAGGTGC  
>MED12\_LsgRNA1195  
ACCCTCAGGACCCCAAACAGAAGGAGGTGC  
>MED12\_LsgRNA1196  
AGGTTTCAGGCTTCACTGTGACAGGAGGAAC  
>MED12\_LsgRNA1197  
AGGTTTCAGGCTTCACTGTGACAGGAGGAAC  
>MED12\_LsgRNA1198  
CTTATCAGGTCTCCCGAATGTTCTGGAGC  
>MED12\_LsgRNA1199  
CTTATCAGGTCTCCCGAATGTTCTGGAGC  
>MED12\_LsgRNA1200  
TCACTCAGTACACCCCATACCTATCGGGAT

>MED12\_LsgRNA1201  
TCACTCAGTACACCCCATACCTATCGGGAT  
>MED12\_LsgRNA1202  
TGGCTCAGTAGCGTCCAAATATGTTGGTAC  
>MED12\_LsgRNA1203  
TGGCTCAGTAGCGTCCAAATATGTTGGTAC  
>MED12\_LsgRNA1204  
GAGGTCAGTCCATGTCCATAGGTGGGGGCC  
>MED12\_LsgRNA1205  
GAGGTCAGTCCATGTCCATAGGTGGGGGCC  
>MED12\_LsgRNA1206  
TGGGTCATCGGCAGGATCATCAAAGGGAGA  
>MED12\_LsgRNA1207  
ATCCTCATTGTCCAGCAGTCGATGTGGATA  
>MED12\_LsgRNA1208  
ATCCTCATTGTCCAGCAGTCGATGTGGATA  
>MED12\_LsgRNA1209  
CCAATCCAAAGATTCGGTTACAAAGGGAGT  
>MED12\_LsgRNA1210  
CCAATCCAAAGATTCGGTTACAAAGGGAGT  
>MED12\_LsgRNA1211  
GTTTTCCAACAGTCAGCAGAGACAGGGTCA  
>MED12\_LsgRNA1212  
GTTTTCCAACAGTCAGCAGAGACAGGGTCA  
>MED12\_LsgRNA1213  
TATTTCCACCCAGTTCAGCGCCAGGGGCT  
>MED12\_LsgRNA1214  
TATTTCCACCCAGTTCAGCGCCAGGGGCT  
>MED12\_LsgRNA1215  
GTAGTCCAGCAGCTACCTGGGGCTGGGACT  
>MED12\_LsgRNA1216  
GTAGTCCAGCAGCTACCTGGGGCTGGGACT  
>MED12\_LsgRNA1217  
GTTCTCCAGCTCTCTAGAGCGCTCTGGTGT  
>MED12\_LsgRNA1218  
GTTCTCCAGCTCTCTAGAGCGCTCTGGTGT  
>MED12\_LsgRNA1219  
AGGATCCAGGGCTCTCAGAATCTATGGACA  
>MED12\_LsgRNA1220  
AGGATCCAGGGCTCTCAGAATCTATGGACA  
>MED12\_LsgRNA1221  
GCACTCCAGGGTAAGTTGGTCGGGTGGGCA  
>MED12\_LsgRNA1222  
GCACTCCAGGGTAAGTTGGTCGGGTGGGCA



>MED12\_LsgRNA1223  
AATGTCCATAGATTCTGAGAGCCCTGGATC  
>MED12\_LsgRNA1224  
AATGTCCATAGATTCTGAGAGCCCTGGATC  
>MED12\_LsgRNA1225  
CGGCTCCATCCACGATGCGGTTCTGGGAGG  
>MED12\_LsgRNA1226  
CGGCTCCATCCACGATGCGGTTCTGGGAGG  
>MED12\_LsgRNA1227  
GCCTTCCCCAGACAAGCCTACAGTAGGAAT  
>MED12\_LsgRNA1228  
GTTCTCCCCTACTATGCCCTGTGAGGGGAA  
>MED12\_LsgRNA1229  
GTTCTCCCCTACTATGCCCTGTGAGGGGAA  
>MED12\_LsgRNA1230  
CCCTTCCCCTCACAGGGCATAGTAGGGGAG  
>MED12\_LsgRNA1231  
CCCTTCCCCTCACAGGGCATAGTAGGGGAG  
>MED12\_LsgRNA1232  
ACTGTCCCCTCAGGTGGGGAGGATGGGCAG  
>MED12\_LsgRNA1233  
ACTGTCCCCTCAGGTGGGGAGGATGGGCAG  
>MED12\_LsgRNA1234  
CATCTCCCGAGGGGACCTTGCTTTGGAGC  
>MED12\_LsgRNA1235  
CATCTCCCGAGGGGACCTTGCTTTGGAGC  
>MED12\_LsgRNA1236  
TGACTCCCTTTGTAACCGAATCTTTGGATT  
>MED12\_LsgRNA1237  
TGACTCCCTTTGTAACCGAATCTTTGGATT  
>MED12\_LsgRNA1238  
CGGCTCCTCATCTTCTGGGGCAGTGGCAG  
>MED12\_LsgRNA1239  
CGGCTCCTCATCTTCTGGGGCAGTGGCAG  
>MED12\_LsgRNA1240  
CTTTTCCTCCTTAGGCTTCACCATTGGACG  
>MED12\_LsgRNA1241  
CTTTTCCTCCTTAGGCTTCACCATTGGACG  
>MED12\_LsgRNA1242  
CTGCTCCTCTAACAATGGCACTTGTGGTTT  
>MED12\_LsgRNA1243  
CTGCTCCTCTAACAATGGCACTTGTGGTTT  
>MED12\_LsgRNA1244  
GGGGTCCTGAGGGTAAACATCGGGAGGCC

>MED12\_LsgRNA1245  
GGGGTCCTGAGGGTAAACATCGGGAGGCC  
>MED12\_LsgRNA1246  
GGCTTCCTGCGACCAGTGTTCAGGAAGGGTA  
>MED12\_LsgRNA1247  
GGCTTCCTGCGACCAGTGTTCAGGAAGGGTA  
>MED12\_LsgRNA1248  
GACATCCTGGAAAATGGGAGCACTGGGAGC  
>MED12\_LsgRNA1249  
GACATCCTGGAAAATGGGAGCACTGGGAGC  
>MED12\_LsgRNA1250  
CACCTCCTTCTGTTTGGGGTCCCTGAGGGTA  
>MED12\_LsgRNA1251  
CACCTCCTTCTGTTTGGGGTCCCTGAGGGTA  
>MED12\_LsgRNA1252  
ACCCTCGAAGTGAGAGTGAGCGGGTGAAT  
>MED12\_LsgRNA1253  
ACCCTCGAAGTGAGAGTGAGCGGGTGAAT  
>MED12\_LsgRNA1254  
GAGATCGAGCAGCAGATCAAGGAGCGGGGA  
>MED12\_LsgRNA1255  
GAGATCGAGCAGCAGATCAAGGAGCGGGGA  
>MED12\_LsgRNA1256  
GGAGTCGAGGGTGTGCTGCTAGTTGGGGGC  
>MED12\_LsgRNA1257  
GGAGTCGAGGGTGTGCTGCTAGTTGGGGGC  
>MED12\_LsgRNA1258  
GGCGTCGTGAAGCATGGGATGAACCGGTCC  
>MED12\_LsgRNA1259  
GGCGTCGTGAAGCATGGGATGAACCGGTCC  
>MED12\_LsgRNA1260  
ATGGTCGTGTCTTCACAGTACTCTGGGGAA  
>MED12\_LsgRNA1261  
ATGGTCGTGTCTTCACAGTACTCTGGGGAA  
>MED12\_LsgRNA1262  
AGGCTCTAGCAGGGTAGGAGCAGGCGGCTC  
>MED12\_LsgRNA1263  
AGGCTCTAGCAGGGTAGGAGCAGGCGGCTC  
>MED12\_LsgRNA1264  
TCCTTCTCGACATCTGGCTTCTCAGGGGAT  
>MED12\_LsgRNA1265  
TCCTTCTCGACATCTGGCTTCTCAGGGGAT  
>MED12\_LsgRNA1266  
TGGGTCTGCTGAAGCCCCTGGCGCTGGAAC

>MED12\_LsgRNA1267  
TGGGTCTGCTGAAGCCCCTGGCGCTGGAAC  
>MED12\_LsgRNA1268  
GCCATCTGGTCCTGGTTGAGGATGAGGCAG  
>MED12\_LsgRNA1269  
GCCATCTGGTCCTGGTTGAGGATGAGGCAG  
>MED12\_LsgRNA1270  
TCCTTCTTACTGAAAATGGGGACCTGGATG  
>MED12\_LsgRNA1271  
CACCTCTTCCTTCTTACTGAAAATGGGGAC  
>MED12\_LsgRNA1272  
CACCTCTTCCTTCTTACTGAAAATGGGGAC  
>MED12\_LsgRNA1273  
CTCATCTTCTGGGGCAGTGGCAGTGGCTC  
>MED12\_LsgRNA1274  
CTCATCTTCTGGGGCAGTGGCAGTGGCTC  
>MED12\_LsgRNA1275  
CAAGTGAACCAGAAGGATAAATTCTGGCTG  
>MED12\_LsgRNA1276  
CAAGTGAACCAGAAGGATAAATTCTGGCTG  
>MED12\_LsgRNA1277  
ATCTTGAAGGTTCTGAACCGCAAAGGGACA  
>MED12\_LsgRNA1278  
ATCTTGAAGGTTCTGAACCGCAAAGGGACA  
>MED12\_LsgRNA1279  
GTTTTGAGAAGATCCGCCCTGGAGAGGATG  
>MED12\_LsgRNA1280  
GTTTTGAGAAGATCCGCCCTGGAGAGGATG  
>MED12\_LsgRNA1281  
CCCCTGAGAAGCCAGATGTTCGAGAAGGAGG  
>MED12\_LsgRNA1282  
CCCCTGAGAAGCCAGATGTTCGAGAAGGAGG  
>MED12\_LsgRNA1283  
TCAGTGAGCTCTTCACTACTGTGTTGGACA  
>MED12\_LsgRNA1284  
TCAGTGAGCTCTTCACTACTGTGTTGGACA  
>MED12\_LsgRNA1285  
GGATTGAGCTGCGGTGTCTTGAAAAGGTGA  
>MED12\_LsgRNA1286  
CAGCTGAGGCCAAAAACCAGGGCCCGGTGC  
>MED12\_LsgRNA1287  
CAGCTGAGGCCAAAAACCAGGGCCCGGTGC  
>MED12\_LsgRNA1288  
CTCGTGATCTGCTCCAGAACATTCGGGAG

>MED12\_LsgRNA1289  
CTCGTGATCTGCTCCAGAACATTCGGGAG  
>MED12\_LsgRNA1290  
AGTCTGCAAACCGTAGGAAGAGCTGGGAGT  
>MED12\_LsgRNA1291  
AGTCTGCAAACCGTAGGAAGAGCTGGGAGT  
>MED12\_LsgRNA1292  
TCTCTGCAATAATGCTGCTGAAGTTGGAAC  
>MED12\_LsgRNA1293  
TCTCTGCAATAATGCTGCTGAAGTTGGAAC  
>MED12\_LsgRNA1294  
ACTATGCAGCAATCTCTGAGACCAAGGTTA  
>MED12\_LsgRNA1295  
ACTATGCAGCAATCTCTGAGACCAAGGTTA  
>MED12\_LsgRNA1296  
CACCTGCAGGTAGTGGCTGGTTCTGGGTGT  
>MED12\_LsgRNA1297  
CACCTGCAGGTAGTGGCTGGTTCTGGGTGT  
>MED12\_LsgRNA1298  
ACATTGCAGGTCCGTGCAAAGTTGCGGGAG  
>MED12\_LsgRNA1299  
ACATTGCAGGTCCGTGCAAAGTTGCGGGAG  
>MED12\_LsgRNA1300  
CTTATGCATGAGGCACTCAAACCTGCGGCTC  
>MED12\_LsgRNA1301  
CTTATGCATGAGGCACTCAAACCTGCGGCTC  
>MED12\_LsgRNA1302  
GCCATGCCATCAAGAAAATCACCAAGGATA  
>MED12\_LsgRNA1303  
GCCATGCCATCAAGAAAATCACCAAGGATA  
>MED12\_LsgRNA1304  
GCAATGCCCTTATGCACGTCTGTGTGGGGC  
>MED12\_LsgRNA1305  
GCAATGCCCTTATGCACGTCTGTGTGGGGC  
>MED12\_LsgRNA1306  
ATCCTGCCGATGACCCAGAGCACAAGGAGG  
>MED12\_LsgRNA1307  
ATCCTGCCGATGACCCAGAGCACAAGGAGG  
>MED12\_LsgRNA1308  
ACAGTGCCGCTGATGATGATCTCCAGGAGG  
>MED12\_LsgRNA1309  
ACAGTGCCGCTGATGATGATCTCCAGGAGG  
>MED12\_LsgRNA1310  
ATCATGCCTGCCTCATCCTCAACCAGGACC

>MED12\_LsgRNA1311  
ATCATGCCTGCCTCATCCTCAACCAGGACC  
>MED12\_LsgRNA1312  
ACAGTGCCTGTGATGCGGGCTGCCTGGCTC  
>MED12\_LsgRNA1313  
ACAGTGCCTGTGATGCGGGCTGCCTGGCTC  
>MED12\_LsgRNA1314  
AGAATGCGCTTTATGCGCTGCCGCTGGGGG  
>MED12\_LsgRNA1315  
AGAATGCGCTTTATGCGCTGCCGCTGGGGG  
>MED12\_LsgRNA1316  
TGACTGCTCACACCATCCAGCTGCAGGGCC  
>MED12\_LsgRNA1317  
TGACTGCTCACACCATCCAGCTGCAGGGCC  
>MED12\_LsgRNA1318  
GCCATGCTCATCCCCAGAGACAGCAGGCTG  
>MED12\_LsgRNA1319  
GCCATGCTCATCCCCAGAGACAGCAGGCTG  
>MED12\_LsgRNA1320  
TTGCTGCTCTACCACACACACCTGAGGCC  
>MED12\_LsgRNA1321  
GACATGCTGAGCGTGCTCATCAATGGGACA  
>MED12\_LsgRNA1322  
GACATGCTGAGCGTGCTCATCAATGGGACA  
>MED12\_LsgRNA1323  
CTGTTGCTGCTGCTGCTGCTGCTCAGGTAG  
>MED12\_LsgRNA1324  
CTGTTGCTGCTGCTGCTGCTGCTCAGGTAG  
>MED12\_LsgRNA1325  
AGGCTGCTGGGGAAGAATTGGAGAAGGGTC  
>MED12\_LsgRNA1326  
AGGCTGCTGGGGAAGAATTGGAGAAGGGTC  
>MED12\_LsgRNA1327  
GGCCTGCTGGTGCACATAGCCACTGGGCCG  
>MED12\_LsgRNA1328  
GGCCTGCTGGTGCACATAGCCACTGGGCCG  
>MED12\_LsgRNA1329  
AAGCTGCTGTCTGTTGCTGCTGCTGGGTCT  
>MED12\_LsgRNA1330  
AAGCTGCTGTCTGTTGCTGCTGCTGGGTCT  
>MED12\_LsgRNA1331  
GACCTGCTTATGTGCCCTCAGCACCGGCC  
>MED12\_LsgRNA1332  
GACCTGCTTATGTGCCCTCAGCACCGGCC

>MED12\_LsgRNA1333  
TGCCTGGACGCCCTGGGCACTCATTGGAGT  
>MED12\_LsgRNA1334  
TGCCTGGACGCCCTGGGCACTCATTGGAGT  
>MED12\_LsgRNA1335  
AGGTTGGACGGGGCAATAGGCAAGTGGTCA  
>MED12\_LsgRNA1336  
AGGTTGGACGGGGCAATAGGCAAGTGGTCA  
>MED12\_LsgRNA1337  
CCATTGGACGGGTACTTCATACTTTGGAAG  
>MED12\_LsgRNA1338  
GGGATGGACTGCCCTTCCCCTCACAGGGCA  
>MED12\_LsgRNA1339  
GGGATGGACTGCCCTTCCCCTCACAGGGCA  
>MED12\_LsgRNA1340  
CCTATGGAGCCTTGCCTGTAGTTAAGGTGT  
>MED12\_LsgRNA1341  
CCTATGGAGCCTTGCCTGTAGTTAAGGTGT  
>MED12\_LsgRNA1342  
TCATTGGAGTCATGGTACTTATCATGGGTG  
>MED12\_LsgRNA1343  
TCATTGGAGTCATGGTACTTATCATGGGTG  
>MED12\_LsgRNA1344  
TGGCTGGCACTCACCTGCAGGTAGTGGCTG  
>MED12\_LsgRNA1345  
TGGCTGGCACTCACCTGCAGGTAGTGGCTG  
>MED12\_LsgRNA1346  
GCAGTGGCAGTGGCTCCAGGTAATAGGCGC  
>MED12\_LsgRNA1347  
GCAGTGGCAGTGGCTCCAGGTAATAGGCGC  
>MED12\_LsgRNA1348  
GAGGTGGCAGTGGTGGTTCGGAGGCAGGGTG  
>MED12\_LsgRNA1349  
GAGGTGGCAGTGGTGGTTCGGAGGCAGGGTG  
>MED12\_LsgRNA1350  
AGCATGGCCCACTCCGTGGTCTGCTGGGTG  
>MED12\_LsgRNA1351  
AGCATGGCCCACTCCGTGGTCTGCTGGGTG  
>MED12\_LsgRNA1352  
CTGTTGGCGAAGGCGCTGTCCTTGGGGCAC  
>MED12\_LsgRNA1353  
CTGTTGGCGAAGGCGCTGTCCTTGGGGCAC  
>MED12\_LsgRNA1354  
CCGATGGCTCCACGTTGCAGTAGATGGTGT

>MED12\_LsgRNA1355  
CCGATGGCTCCACGTTGCAGTAGATGGTGT  
>MED12\_LsgRNA1356  
GCAGTGGCTCCAGGTAATAGGCGGGGGCC  
>MED12\_LsgRNA1357  
GCAGTGGCTCCAGGTAATAGGCGGGGGCC  
>MED12\_LsgRNA1358  
AAGATGGCTGAATACTACCGGCCAGGGCCT  
>MED12\_LsgRNA1359  
AAGATGGCTGAATACTACCGGCCAGGGCCT  
>MED12\_LsgRNA1360  
GGGCTGGGACTGGGGCTGGGGTTGGGGAGG  
>MED12\_LsgRNA1361  
GGGCTGGGACTGGGGCTGGGGTTGGGGAGG  
>MED12\_LsgRNA1362  
GGGCTGGGCAAGATGGCGGCCTTCGGGATC  
>MED12\_LsgRNA1363  
GGGCTGGGCAAGATGGCGGCCTTCGGGATC  
>MED12\_LsgRNA1364  
GAGGTGGGCAGTTTAGCAATGAGGGGGGCC  
>MED12\_LsgRNA1365  
GAGGTGGGCAGTTTAGCAATGAGGGGGGCC  
>MED12\_LsgRNA1366  
CCACTGGGCCGCTGTTGCAGGTGGCGGGTA  
>MED12\_LsgRNA1367  
CCACTGGGCCGCTGTTGCAGGTGGCGGGTA  
>MED12\_LsgRNA1368  
TGTGTGGGGCACCATGATCCCGATAGGTAT  
>MED12\_LsgRNA1369  
TGTGTGGGGCACCATGATCCCGATAGGTAT  
>MED12\_LsgRNA1370  
ATCATGGGTGTCTGCTGCAGTGTCTGGTGT  
>MED12\_LsgRNA1371  
ATCATGGGTGTCTGCTGCAGTGTCTGGTGT  
>MED12\_LsgRNA1372  
GGATTGGTAGAAGGGTGGGTGCTCTGGTAA  
>MED12\_LsgRNA1373  
GGATTGGTAGAAGGGTGGGTGCTCTGGTAA  
>MED12\_LsgRNA1374  
TCGCTGGTGCTAACATGTCTGAAAGGGCAG  
>MED12\_LsgRNA1375  
TCGCTGGTGCTAACATGTCTGAAAGGGCAG  
>MED12\_LsgRNA1376  
GCTGTGGTGTCAATTGCTATGTGAATGGGCT

>MED12\_LsgRNA1377  
GCTGTGGTGTTCATTGCTATGTGAATGGGCT  
>MED12\_LsgRNA1378  
GTCATGGTTGTGGGCAGCACTCCAGGGTAA  
>MED12\_LsgRNA1379  
GTCATGGTTGTGGGCAGCACTCCAGGGTAA  
>MED12\_LsgRNA1380  
CCTTTGTAACCGAATCTTTGGATTGGGACC  
>MED12\_LsgRNA1381  
CCTTTGTAACCGAATCTTTGGATTGGGACC  
>MED12\_LsgRNA1382  
ACGTTGTAATACCCTTCCTGACACTGGTTCG  
>MED12\_LsgRNA1383  
ACGTTGTAATACCCTTCCTGACACTGGTTCG  
>MED12\_LsgRNA1384  
GAGATGTCATCACGTGTGAGCCACAGGGCT  
>MED12\_LsgRNA1385  
GAGATGTCATCACGTGTGAGCCACAGGGCT  
>MED12\_LsgRNA1386  
TTGCTGTCCTCACACAGAGACTTAAGGCAA  
>MED12\_LsgRNA1387  
TTGCTGTCCTCACACAGAGACTTAAGGCAA  
>MED12\_LsgRNA1388  
TTCCTGTGCCTGCAGAAGGAGTTGGGGGAG  
>MED12\_LsgRNA1389  
TTCCTGTGCCTGCAGAAGGAGTTGGGGGAG  
>MED12\_LsgRNA1390  
AGGCTGTGTGGCGTCGTGAAGCATGGGATG  
>MED12\_LsgRNA1391  
AGGCTGTGTGGCGTCGTGAAGCATGGGATG  
>MED12\_LsgRNA1392  
AAGGTGTGTTATAGAACCAGGGTTTGGGTG  
>MED12\_LsgRNA1393  
AAGGTGTGTTATAGAACCAGGGTTTGGGTG  
>MED12\_LsgRNA1394  
GCACTGTTACCCTCTGGCATGGGCAGGTTG  
>MED12\_LsgRNA1395  
GCACTGTTACCCTCTGGCATGGGCAGGTTG  
>MED12\_LsgRNA1396  
GACATGTTAGCACCAGCGATAAGAAGGGCT  
>MED12\_LsgRNA1397  
GACATGTTAGCACCAGCGATAAGAAGGGCT  
>MED12\_LsgRNA1398  
ATCTTGTTGCCCTTGGTATCGATAAGGGAG



>MED12\_LsgRNA1399  
ATCTTGTGCCCTTGGTATCGATAAGGGAG  
>MED12\_LsgRNA1400  
AATATGTTGGTACTGGGCTGTGGCTGGGTA  
>MED12\_LsgRNA1401  
AATATGTTGGTACTGGGCTGTGGCTGGGTA  
>MED12\_LsgRNA1402  
CAGTTTAAGCAATTCATCCTCTCCAGGGCG  
>MED12\_LsgRNA1403  
CAGTTTAAGCAATTCATCCTCTCCAGGGCG  
>MED12\_LsgRNA1404  
GTAGTTAAGGTGTGTTATAGAACCAGGGTT  
>MED12\_LsgRNA1405  
GTAGTTAAGGTGTGTTATAGAACCAGGGTT  
>MED12\_LsgRNA1406  
CTGCTTACCTGCAACTTCTTCGCCAGGTTC  
>MED12\_LsgRNA1407  
CTGCTTACCTGCAACTTCTTCGCCAGGTTC  
>MED12\_LsgRNA1408  
TCACTTACTTCCATCAGACTGGCAAGGATT  
>MED12\_LsgRNA1409  
TCACTTACTTCCATCAGACTGGCAAGGATT  
>MED12\_LsgRNA1410  
CCCTTTAGCAGAGTCAGGGCATGTTGGGAC  
>MED12\_LsgRNA1411  
TGTGTTATAGAACCAGGGTTTGGGTGGTGC  
>MED12\_LsgRNA1412  
TGTGTTATAGAACCAGGGTTTGGGTGGTGC  
>MED12\_LsgRNA1413  
GAAGTTATCCTTCTGGTTCACTTGGGGCTT  
>MED12\_LsgRNA1414  
GAAGTTATCCTTCTGGTTCACTTGGGGCTT  
>MED12\_LsgRNA1415  
GCCCTTATGGTGTGACAGTGCCTCCGGACC  
>MED12\_LsgRNA1416  
GCCCTTATGGTGTGACAGTGCCTCCGGACC  
>MED12\_LsgRNA1417  
TCCCTTCAATCTTCTCCTTGGGTGGGGGCT  
>MED12\_LsgRNA1418  
TCCCTTCAATCTTCTCCTTGGGTGGGGGCT  
>MED12\_LsgRNA1419  
GGGCTTACCTCCTTCTCGACATCTGGCTT  
>MED12\_LsgRNA1420  
GGGCTTACCTCCTTCTCGACATCTGGCTT

>MED12\_LsgRNA1421  
CTATTTCCACCCAGTTCCAGCGCCAGGGGC  
>MED12\_LsgRNA1422  
CTATTTCCACCCAGTTCCAGCGCCAGGGGC  
>MED12\_LsgRNA1423  
GCCCTTCCCCTCACAGGGCATAGTAGGGGA  
>MED12\_LsgRNA1424  
GCCCTTCCCCTCACAGGGCATAGTAGGGGA  
>MED12\_LsgRNA1425  
CGGATTCCTACTGTAGGCTTGTCTGGGGAA  
>MED12\_LsgRNA1426  
CGGATTCCTACTGTAGGCTTGTCTGGGGAA  
>MED12\_LsgRNA1427  
GGTGTTCGTAGCTCAAGATCCCGAAGGCCG  
>MED12\_LsgRNA1428  
GGTGTTCGTAGCTCAAGATCCCGAAGGCCG  
>MED12\_LsgRNA1429  
TATGTTCTATGCCCTCAGGATCCAGGGCTC  
>MED12\_LsgRNA1430  
TATGTTCTATGCCCTCAGGATCCAGGGCTC  
>MED12\_LsgRNA1431  
CTTTTTCTCAGGCTCTAGCAGGGTAGGAGC  
>MED12\_LsgRNA1432  
CTTTTTCTCAGGCTCTAGCAGGGTAGGAGC  
>MED12\_LsgRNA1433  
TCTTTTCTCCCTTTAGCAGAGTCAGGGCAT  
>MED12\_LsgRNA1434  
TCTTTTCTCCCTTTAGCAGAGTCAGGGCAT  
>MED12\_LsgRNA1435  
CTCCTTCTCGACATCTGGCTTCTCAGGGGA  
>MED12\_LsgRNA1436  
CTCCTTCTCGACATCTGGCTTCTCAGGGGA  
>MED12\_LsgRNA1437  
CAGCTTCTGCATTGGTAAGCGCACAGGACG  
>MED12\_LsgRNA1438  
CAGCTTCTGCATTGGTAAGCGCACAGGACG  
>MED12\_LsgRNA1439  
CTTCTTCTTGCCTCCTCAGTACTGGGTGG  
>MED12\_LsgRNA1440  
CTTCTTCTTGCCTCCTCAGTACTGGGTGG  
>MED12\_LsgRNA1441  
TATCTTGAAGGTTCTGAACCGCAAAGGGAC  
>MED12\_LsgRNA1442  
TATCTTGAAGGTTCTGAACCGCAAAGGGAC

>MED12\_LsgRNA1443  
ATCTTTGCCTGGAGCTGTTGGCGAAGGCGC  
>MED12\_LsgRNA1444  
ATCTTTGCCTGGAGCTGTTGGCGAAGGCGC  
>MED12\_LsgRNA1445  
AACGTTGCCTTAAGTCTCTGTGTGAGGACA  
>MED12\_LsgRNA1446  
AACGTTGCCTTAAGTCTCTGTGTGAGGACA  
>MED12\_LsgRNA1447  
CTTCTTGCGTTCCTCAGTACTGGGTGGAGC  
>MED12\_LsgRNA1448  
CTTCTTGCGTTCCTCAGTACTGGGTGGAGC  
>MED12\_LsgRNA1449  
TCATTTGCTATCCACATCGACTGCTGGACA  
>MED12\_LsgRNA1450  
TCATTTGCTATCCACATCGACTGCTGGACA  
>MED12\_LsgRNA1451  
CAGGTTGCTGCTGCCGGTACACAGAGGTCT  
>MED12\_LsgRNA1452  
CAGGTTGCTGCTGCCGGTACACAGAGGTCT  
>MED12\_LsgRNA1453  
TGGTTTGGAACAGTCCGAGTGGACCGGCGA  
>MED12\_LsgRNA1454  
TGGTTTGGAACAGTCCGAGTGGACCGGCGA  
>MED12\_LsgRNA1455  
AGAATTGGAGAAGGGTCAGCACCTGGGTTC  
>MED12\_LsgRNA1456  
AGAATTGGAGAAGGGTCAGCACCTGGGTTC  
>MED12\_LsgRNA1457  
GCTGTTGGCGAAGGCGCTGTCCCTTGGGGCA  
>MED12\_LsgRNA1458  
GCTGTTGGCGAAGGCGCTGTCCCTTGGGGCA  
>MED12\_LsgRNA1459  
CAGATTGGTAGTTCACCAGCATTAAAGGAGT  
>MED12\_LsgRNA1460  
CAGATTGGTAGTTCACCAGCATTAAAGGAGT  
>MED12\_LsgRNA1461  
GCGGTTGGTCGTACTIONGTTTGGGGTGGGAAA  
>MED12\_LsgRNA1462  
GCGGTTGGTCGTACTIONGTTTGGGGTGGGAAA  
>MED12\_LsgRNA1463  
CTGATTGTCAGCTTCCTCAGGAATGGGTAG  
>MED12\_LsgRNA1464  
CTGATTGTCAGCTTCCTCAGGAATGGGTAG

>MED12\_LsgRNA1465  
 CTCCTTGTGCTCTGGGTCATCGGCAGGATC  
 >MED12\_LsgRNA1466  
 CTCCTTGTGCTCTGGGTCATCGGCAGGATC  
 >MED12\_LsgRNA1467  
 GGCCTTGTGCTGCTCCTCTAACAATGGCAC  
 >MED12\_LsgRNA1468  
 GGCCTTGTGCTGCTCCTCTAACAATGGCAC  
 >MED12\_LsgRNA1469  
 CTTGTTGTGGCCCTGGCAGGTGGGGGGCAT  
 >MED12\_LsgRNA1470  
 CTTGTTGTGGCCCTGGCAGGTGGGGGGCAT  
 >MED12\_LsgRNA1471  
 CATGTTTCTATCCGACCTGAGCACAGGCTT  
 >MED12\_LsgRNA1472  
 CATGTTTCTATCCGACCTGAGCACAGGCTT  
 >MED12\_LsgRNA1473  
 CTCTTTTCTCCCTTTAGCAGAGTCAGGGCA  
 >MED12\_LsgRNA1474  
 CTCTTTTCTCCCTTTAGCAGAGTCAGGGCA  
 >MED12\_LsgRNA1475  
 AGGGTTTGGGTGGTGCAGGAGGTCCGGAGG  
 >MED12\_LsgRNA1476  
 AGGGTTTGGGTGGTGCAGGAGGTCCGGAGG  
 >MED12\_LsgRNA1477  
 CAAATTTGTTCTTTAAATGGCTACAGGAGG  
 >MED12\_LsgRNA1478  
 CAAATTTGTTCTTTAAATGGCTACAGGAGG

(23)  $S_6^-$ : 152 low on-target activity sgRNAs targeting TADA2B

>TADA2B\_LsgRNA1  
 AACAAAAACCTAGCCGGCTCCAAACGGGGA  
 >TADA2B\_LsgRNA2  
 ACAAAAACCTAGCCGGCTCCAAACGGGGAA  
 >TADA2B\_LsgRNA3  
 CAAAAACCTAGCCGGCTCCAAACGGGGAAA  
 >TADA2B\_LsgRNA4  
 CCAAAAAGCCGCCTTCCTAGCTACCTGGACA  
 >TADA2B\_LsgRNA5  
 GAGGAAGGAGAACAAAAACCTAGCCGGCTC  
 >TADA2B\_LsgRNA6  
 CTACAATCTGGTGCCAGCCTTCCTGGGGAA  
 >TADA2B\_LsgRNA7  
 TCTGACAGGAGCTCGAAGCCTGGAAGGTTTC

>TADA2B\_LsgRNA8  
GAGTACGAGGCAGCGCGGCATAAACGGGAG  
>TADA2B\_LsgRNA9  
TGTCACGCGGTTGGGGATGGTGTCTCGGGAT  
>TADA2B\_LsgRNA10  
GTGGACGGCGGGCGCTTACGCTCTGGGGG  
>TADA2B\_LsgRNA11  
TCAAACTCCTTGCATGACATGAACTGGTAC  
>TADA2B\_LsgRNA12  
TCACAGAAAGCGGCTGGATCTCCAGGGACG  
>TADA2B\_LsgRNA13  
ACAGAGATGTCCAGCGGGGCAGCGGGGTG  
>TADA2B\_LsgRNA14  
ATCGAGCAGTTCGGCTTCGAAACTGGGTG  
>TADA2B\_LsgRNA15  
ACCTAGCCGGCTCCAAACGGGGAAAGGAGG  
>TADA2B\_LsgRNA16  
TGGTAGCCGTGGTAGCGGCGGTGGTGGCCG  
>TADA2B\_LsgRNA17  
GTGAAGCGCCCGCCGTCCACCAGCTGGTAG  
>TADA2B\_LsgRNA18  
CAGCAGCTGGGCTACATGCCGCTGCGGGAT  
>TADA2B\_LsgRNA19  
CTTTAGGACTTTGTCCAGGTAGCTAGGAAG  
>TADA2B\_LsgRNA20  
GAGAAGGAGCTGCGCCTGAAGCTGAGGCCG  
>TADA2B\_LsgRNA21  
ATGCAGGCCTTCCCCAGGTTCCCGTGGATG  
>TADA2B\_LsgRNA22  
TTGGAGGGGATTCTTGCCGCTTCTGGAGG  
>TADA2B\_LsgRNA23  
CTCGATCTCGTAATCATCCCCGAGCGGCAT  
>TADA2B\_LsgRNA24  
TACAACTCTGGTGCCAGCCTTCTGGGGAAG  
>TADA2B\_LsgRNA25  
GAGCATGTACATCCACGGGAACCTGGGGAA  
>TADA2B\_LsgRNA26  
TTGAATTTCTCACAGAAAGCGGCTGGATC  
>TADA2B\_LsgRNA27  
CTGTCAACTATGATGACGACGACGTGGAGA  
>TADA2B\_LsgRNA28  
AGCGCAAGATCACCAAGGAGGAGAAGGAGC  
>TADA2B\_LsgRNA29  
ACTACAATCTGGTGCCAGCCTTCTGGGGA

>TADA2B\_LsgRNA30  
GCCTCACCACCCCGCTGCCCCGCTGGACA  
>TADA2B\_LsgRNA31  
CTGTCACGCGGTTGGGGATGGTGTCTGGGGA  
>TADA2B\_LsgRNA32  
CTACCACGGCTACCAGCTGGTGGACGGCGG  
>TADA2B\_LsgRNA33  
CTCACAGAAAGCGGCTGGATCTCCAGGGAC  
>TADA2B\_LsgRNA34  
CCAGCAGCAGCTGCTCCTCGCGACTGGTCC  
>TADA2B\_LsgRNA35  
GGCACAGCTCGATGTCCTGGCACTCGGTGC  
>TADA2B\_LsgRNA36  
GCTCCATCACCTCTTGGGGAGTCCGGGAAG  
>TADA2B\_LsgRNA37  
TGTACATCCACGGGAACCTGGGGAAGGCCT  
>TADA2B\_LsgRNA38  
AGAACATCGCCCGTACTACAATCTGGTGC  
>TADA2B\_LsgRNA39  
TGAGCATGTACATCCACGGGAACCTGGGGA  
>TADA2B\_LsgRNA40  
TCCACCAGCTGGTAGCCGTGGTAGCGGCGG  
>TADA2B\_LsgRNA41  
TGCTCCATCACCTCTTGGGGAGTCCGGGAA  
>TADA2B\_LsgRNA42  
ACCGCCGCTACCACGGCTACCAGCTGGTGG  
>TADA2B\_LsgRNA43  
GGTACCGCTGCAGTTCTCGGATCTTGGCCC  
>TADA2B\_LsgRNA44  
CTTCCCGACTCCCCAAGAGGTGATGGAGC  
>TADA2B\_LsgRNA45  
AGATCGAGCTGAAGCGCGCCACGTGGACA  
>TADA2B\_LsgRNA46  
AGTACGAGGCAGCGCGGCATAAACGGGAGA  
>TADA2B\_LsgRNA47  
TCGGCGCCGGCCGAGAAGCACTCGGGGCAC  
>TADA2B\_LsgRNA48  
GCAGCGCGGCATAAACGGGAGAAGAGGAAG  
>TADA2B\_LsgRNA49  
GTCACGCGGTTGGGGATGGTGTCTGGGGATG  
>TADA2B\_LsgRNA50  
GAGTCGGCAGAGTACGAGGCAGCGCGGCAT  
>TADA2B\_LsgRNA51  
TGGACGGCGGGCGCTTACGCTCTGGGGGC

>TADA2B\_LsgRNA52  
TAGCCGGCTCCAAACGGGGAAAGGAGGACG  
>TADA2B\_LsgRNA53  
GTGTCTGGGGATGCAGGCCTTCCCCAGGTTC  
>TADA2B\_LsgRNA54  
CACTCGGGGCACAGCTCGATGTCTTGGCAC  
>TADA2B\_LsgRNA55  
CGAGCGGGGAAGATGGCGGAGCTGGGGAA  
>TADA2B\_LsgRNA56  
CACTCGGTGCAGCGGAAGCGCAGCGGGCTC  
>TADA2B\_LsgRNA57  
CTCACGTAATGCTCCATCACCTCTTGGGGA  
>TADA2B\_LsgRNA58  
CCGCCGTCCACCAGCTGGTAGCCGTGGTAG  
>TADA2B\_LsgRNA59  
GCCGCTACCACGGCTACCAGCTGGTGGACG  
>TADA2B\_LsgRNA60  
CGTCTCCTTTCCCCGTTTGGAGCCGGCTA  
>TADA2B\_LsgRNA61  
CGTACTCTGCCGACTCTTCCATCTTGGTGA  
>TADA2B\_LsgRNA62  
CACGCTCTGGGGGCCCGAGGCCGAGGGCGG  
>TADA2B\_LsgRNA63  
AGAAGTGCAGCGGTACCGCGAAACGGGAT  
>TADA2B\_LsgRNA64  
ATGGCTGCCCACGTTGGTGCTTCCCGGACT  
>TADA2B\_LsgRNA65  
AAGGCTGGCACCAGATTGTAGTCACGGGCG  
>TADA2B\_LsgRNA66  
TGCGCTTCCGCTGCACCGAGTGCCAGGACA  
>TADA2B\_LsgRNA67  
CAGCCTTCTTGGGAAGGACAAGAAGGAGA  
>TADA2B\_LsgRNA68  
TCTCCTTCTTGTCTTCCCCAGGAAGGCTG  
>TADA2B\_LsgRNA69  
AGGACTTTGTCCAGGTAGCTAGGAAGGCGG  
>TADA2B\_LsgRNA70  
GTAGGAAGATATGGCTGCCACGTTGGTGC  
>TADA2B\_LsgRNA71  
GCTCGAAGCCTGGAAGGTTCTCAATGGCGG  
>TADA2B\_LsgRNA72  
CGCTGAAGCGCAAGATCACCAAGGAGGAGA  
>TADA2B\_LsgRNA73  
GGAAGAAGTACTGCGTGTACTGCCTGGCCG

>TADA2B\_LsgRNA74  
GACAGACCACACCTGTCCCAGCGGAGGCC  
>TADA2B\_LsgRNA75  
TAAAGACCACCTCCAGAAGCGGCAAGGAAT  
>TADA2B\_LsgRNA76  
CACAGAGATGTCCAGCGGGGCAGCGGGGT  
>TADA2B\_LsgRNA77  
GTGAGAGGGGGCCTCCGCTGGGACAGGTGT  
>TADA2B\_LsgRNA78  
TGGGGAGTCCGGAAGCACCAACGTGGGCA  
>TADA2B\_LsgRNA79  
ACGGGATCACCAAGATGGAAGAGTCGGCAG  
>TADA2B\_LsgRNA80  
CAGAGATGTCCAGCGGGGCAGCGGGTGG  
>TADA2B\_LsgRNA81  
ACATGCACAAAGAAAAAATGCTCCGGGCCA  
>TADA2B\_LsgRNA82  
CGCGGCATAAACGGGAGAAGAGGAAGGAGA  
>TADA2B\_LsgRNA83  
GGACGCCATCGAGCAGTTCGGCTTCGGAAA  
>TADA2B\_LsgRNA84  
CGCTGCCCCGCTGGACATCTCTGTGGCTG  
>TADA2B\_LsgRNA85  
GTTTCGCCCATTTGAGAACCTTCCAGGCTT  
>TADA2B\_LsgRNA86  
CTTTGCCGTCCTCCTTTCCCGTTTGGAGC  
>TADA2B\_LsgRNA87  
CGAAGCCTGGAAGGTTCTCAATGGCGGCGA  
>TADA2B\_LsgRNA88  
ACCGGCGAAACGGGATCACCAAGATGGAAG  
>TADA2B\_LsgRNA89  
CCTCGCGACTGGTCCAGCCGCCCTCGGCCT  
>TADA2B\_LsgRNA90  
TCAGGCGCAGCTCCTTCTCCTCCTTGGTGA  
>TADA2B\_LsgRNA91  
CTCGGCGCCGGCCGAGAAGCACTCGGGGCA  
>TADA2B\_LsgRNA92  
GACGGCGGGCGCTTCACGCTCTGGGGGCC  
>TADA2B\_LsgRNA93  
GCGAGCGGGGAAGATGGCGGAGCTGGGGA  
>TADA2B\_LsgRNA94  
TCCAGCGGGGCAGCGGGGTGGTGAGGCTG  
>TADA2B\_LsgRNA95  
TCGAGCTCCTGTCAGATCGCGAGAAGGTGC



>TADA2B\_LsgRNA96  
TCACGCTCTGGGGGCCCGAGGCCGAGGGCG  
>TADA2B\_LsgRNA97  
AGGCGCTGAAGCGCAAGATCACCAAGGAGG  
>TADA2B\_LsgRNA98  
AGCAGCTGGGCTACATGCCGCTGCGGGATG  
>TADA2B\_LsgRNA99  
ACCAGCTGGTAGCCGTGGTAGCGGCGGTGG  
>TADA2B\_LsgRNA100  
TCGAGCTGTGCCCCGAGTGCTTCTCGGCCG  
>TADA2B\_LsgRNA101  
AGATGGAAGAGTCGGCAGAGTACGAGGCAG  
>TADA2B\_LsgRNA102  
GGAAGGACAAGAAGGAGAAGGAAAAGGCCG  
>TADA2B\_LsgRNA103  
GAGGGGATTCCTTGCCGCTTCTGGAGGTGG  
>TADA2B\_LsgRNA104  
GATCGGCCACCACCGCCGCTACCACGGCTA  
>TADA2B\_LsgRNA105  
TGGGGGCCCGAGGCCGAGGGCGGCTGGACC  
>TADA2B\_LsgRNA106  
AGGGGGCCTCCGCTGGGACAGGTGTGGTCT  
>TADA2B\_LsgRNA107  
TCTCGGCGCCGGCCGAGAAGCACTCGGGGC  
>TADA2B\_LsgRNA108  
GGACGGCGGGCGCTTACGCTCTGGGGGCC  
>TADA2B\_LsgRNA109  
CCACGGCTACCAGCTGGTGGACGGCGGGCG  
>TADA2B\_LsgRNA110  
GCGGGGGCAGCGGGGTGGTGAGGCTGGGTG  
>TADA2B\_LsgRNA111  
CCGAGGGCGGCTGGACCAGTCGCGAGGAGC  
>TADA2B\_LsgRNA112  
GGTTGGGGATGGTGTGCGGGATGCAGGCCT  
>TADA2B\_LsgRNA113  
GAGCGGGGAAGATGGCGGAGCTGGGGAAG  
>TADA2B\_LsgRNA114  
GGCTGGGTGAGAGGGGGCCTCCGCTGGGAC  
>TADA2B\_LsgRNA115  
AGCGGGGTGGTGAGGCTGGGTGAGAGGGGG  
>TADA2B\_LsgRNA116  
AACTGGTACAGCGGCCTCAGCTTCAGGCCG  
>TADA2B\_LsgRNA117  
AGCTGGTAGCCGTGGTAGCGGCGGTGGTGG

>TADA2B\_LsgRNA118  
GACTGGTCCAGCCGCCCTCGGCCTCGGGCC  
>TADA2B\_LsgRNA119  
GCTGGGTGAGAGGGGGCCTCCGCTGGGACA  
>TADA2B\_LsgRNA120  
ATCTGGTGCCAGCCTTCCTGGGGAAGGACA  
>TADA2B\_LsgRNA121  
GCGGGGTGGTGGGCTGGGTGAGAGGGGGC  
>TADA2B\_LsgRNA122  
GACAGGTGTGGTCTGTACGCGGTTGGGGA  
>TADA2B\_LsgRNA123  
TCACGTAATGCTCCATCACCTCTTGGGGAG  
>TADA2B\_LsgRNA124  
CCAGGTAGCTAGGAAGGCGGCTTTTGGAGG  
>TADA2B\_LsgRNA125  
ACTGGTCCAGCCGCCCTCGGCCTCGGGCCC  
>TADA2B\_LsgRNA126  
TGTGGTCTGTACGCGGTTGGGGATGGTGT  
>TADA2B\_LsgRNA127  
CGGGGTGGTGGGCTGGGTGAGAGGGGGCC  
>TADA2B\_LsgRNA128  
GGCGGTGGTGGCCGATCTCGGCGCCGGCCG  
>TADA2B\_LsgRNA129  
ACAGGTGTGGTCTGTACGCGGTTGGGGAT  
>TADA2B\_LsgRNA130  
ATAATAGTCTTCACAGTCACGTAGCGGGCT  
>TADA2B\_LsgRNA131  
CTGCTCAGCCACAGAGATGTCCAGCGGGGG  
>TADA2B\_LsgRNA132  
CGTCTCAGCTTCAAGACGCGTCCCTGGAGA  
>TADA2B\_LsgRNA133  
CGGCTCCAAACGGGGAAAGGAGGACGGCAA  
>TADA2B\_LsgRNA134  
AAGATCCGAGAACTGCAGCGGTACCGGCGA  
>TADA2B\_LsgRNA135  
CCAGTCGCGAGGAGCAGCTGCTGCTGGACG  
>TADA2B\_LsgRNA136  
GCGATCTGACAGGAGCTCGAAGCCTGGAAG  
>TADA2B\_LsgRNA137  
TCCATCTTGGTGATCCCGTTTCGCCGGTAC  
>TADA2B\_LsgRNA138  
AACATGCACAAAGAAAAAATGCTCCGGGCC  
>TADA2B\_LsgRNA139  
GAACTGCAGCGGTACCGGCGAAACGGGATC

>TADA2B\_LsgRNA140  
 GCTGTGCCCCGAGTGCTTCTCGGCCGGCGC  
 >TADA2B\_LsgRNA141  
 TACCTGGACAAAGTCCTAAAGAAAAGGATT  
 >TADA2B\_LsgRNA142  
 GCTCTGGGGGCCCGAGGCCGAGGGCGGCTG  
 >TADA2B\_LsgRNA143  
 ACTTTGTCCAGGTAGCTAGGAAGGCGGCTT  
 >TADA2B\_LsgRNA144  
 TCTCTGTGGCTGAGCAGCAGCAGCTGGGCT  
 >TADA2B\_LsgRNA145  
 CAGGTGTGGTCTGTCACGCGGTTGGGGATG  
 >TADA2B\_LsgRNA146  
 ATAATTAAAGACCACCTCCAGAAGCGGCAA  
 >TADA2B\_LsgRNA147  
 ATGATTACGAGATCGAGTATGACCAGGATG  
 >TADA2B\_LsgRNA148  
 TCCTTTCCCCGTTTGGAGCCGGCTAGGTTT  
 >TADA2B\_LsgRNA149  
 GGGATTCCTTGCCGCTTCTGGAGGTGGTCT  
 >TADA2B\_LsgRNA150  
 GTGCTTCTCGGCCGGCGCCGAGATCGGCCA  
 >TADA2B\_LsgRNA151  
 GATTTTGAATTTCTCACAGAAAGCGGCTG  
 >TADA2B\_LsgRNA152  
 CTTCTTGTCTTCCCCAGGAAGGCTGGCAC

(24) S<sub>7</sub>: 87 low on-target activity sgRNAs targeting TADA1

>TADA1\_LsgRNA1  
 TTCAAAAAGATCGTACATGTTACCCGGAGG  
 >TADA1\_LsgRNA2  
 AAGGAAAGCTTATCGGTTACGAGATGGTCA  
 >TADA1\_LsgRNA3  
 ATTGAAAGGATCATCACGAAACTCTGGCAT  
 >TADA1\_LsgRNA4  
 TTGTAAGCTACTACACTATTCTTCAGGTAT  
 >TADA1\_LsgRNA5  
 CACAAATTGCTGGGCTCCTGAGAGAGGATT  
 >TADA1\_LsgRNA6  
 CCACACAATGATGCTTCCCACTCGAGGCCA  
 >TADA1\_LsgRNA7  
 AGCTACTACACTATTCTTCAGGTATGGCTG  
 >TADA1\_LsgRNA8  
 TCATAGACTTCTCACACAGGATAATGGTAA

>TADA1\_LsgRNA9  
AAAAAGATCGTACATGTTACCCGAGGCAA  
>TADA1\_LsgRNA10  
GCAAAGATGCAGGTAGAGTGTCTCCGGAGC  
>TADA1\_LsgRNA11  
CCGCAGCAAAACCTGGAAAACCCAAGGGAA  
>TADA1\_LsgRNA12  
CAGGAGCCCAGCAATTTGTGGCAAAGGATC  
>TADA1\_LsgRNA13  
CGCCAGCGCTTGGCAGCCAAGGAGGGGCTT  
>TADA1\_LsgRNA14  
TTGAAGCTCATAGACTTCTCACACAGGATA  
>TADA1\_LsgRNA15  
GAGAAGCTGGATTCTGACCAGCACAGGGAG  
>TADA1\_LsgRNA16  
GCACAGGGAGCAGTAAAAGCTGGAGGGCTG  
>TADA1\_LsgRNA17  
CTCGAGTGGGAAGCATCATTGTGTGGGAAC  
>TADA1\_LsgRNA18  
GGGGATCCTTTGCCACAAATTGCTGGGCTC  
>TADA1\_LsgRNA19  
CTAGATGGTGCTGGATCTTTGCCTTGGCCA  
>TADA1\_LsgRNA20  
CACTATTCTTCAGGTATGGCTGCGGGGTCA  
>TADA1\_LsgRNA21  
AAGACAAAGTTCACCGCCAGCGCTTGGCAG  
>TADA1\_LsgRNA22  
ATTCCAGCCTCAAATCCTCTCTCAGGAGC  
>TADA1\_LsgRNA23  
CCGCCAGCGCTTGGCAGCCAAGGAGGGGCT  
>TADA1\_LsgRNA24  
AGCACAGGGAGCAGTAAAAGCTGGAGGGCT  
>TADA1\_LsgRNA25  
CTTCCCACTCGAGGCCAGCTTGAAGGGAGA  
>TADA1\_LsgRNA26  
ACCGCCAGCGCTTGGCAGCCAAGGAGGGGC  
>TADA1\_LsgRNA27  
GCTTCCCACTCGAGGCCAGCTTGAAGGGAG  
>TADA1\_LsgRNA28  
CACCCCCTGATGATGCTGAGCAGCAGGCTG  
>TADA1\_LsgRNA29  
TTCTCCCTTCAAGCTGGCCTCGAGTGGGAA  
>TADA1\_LsgRNA30  
TTCACCGCCAGCGCTTGGCAGCCAAGGAGG

>TADA1\_LsgRNA31  
AGCCCCCTCCTTGGCTGCCAAGCGCTGGCGG  
>TADA1\_LsgRNA32  
GCAGCCTGCTGCTCAGCATCATCAGGGGGT  
>TADA1\_LsgRNA33  
TCTCCCTTCAAGCTGGCCTCGAGTGGGAAG  
>TADA1\_LsgRNA34  
CCCTCCTTGGCTGCCAAGCGCTGGCGGTGA  
>TADA1\_LsgRNA35  
TGGCCGCTCCAGCTCGCTCACAAAGGTCG  
>TADA1\_LsgRNA36  
GCTGCGGGGTCACGTTACTGCCAAAGGCAT  
>TADA1\_LsgRNA37  
GTCACTATCATTTCTCCCTTCAAGCTGGCCT  
>TADA1\_LsgRNA38  
TACACTATTCTTCAGGTATGGCTGCGGGGT  
>TADA1\_LsgRNA39  
CTCTCTCAGGAGCCAGCAATTTGTGGCAA  
>TADA1\_LsgRNA40  
ACAACCTGACGTCAGTATATCTTTAAGGTGA  
>TADA1\_LsgRNA41  
CAGCCTGCTGCTCAGCATCATCAGGGGGTG  
>TADA1\_LsgRNA42  
GGTGCTGGATCTTTGCCTTGGCCAGGGGGT  
>TADA1\_LsgRNA43  
GTAGCTTACAACAACCTTAATAGAAAGGTAA  
>TADA1\_LsgRNA44  
CGACCTTTGTGAGCGAGCTGGAGGCGGCCA  
>TADA1\_LsgRNA45  
ATCTGACAACGCGTGAGAATGGCCAGGAGG  
>TADA1\_LsgRNA46  
TGGCGACCTTTGTGAGCGAGCTGGAGGCGG  
>TADA1\_LsgRNA47  
TAGTGACTGCTTATGAGCATGGGCTGGACA  
>TADA1\_LsgRNA48  
TTAAGAGCATAGACAGTATGTGTAGGGATG  
>TADA1\_LsgRNA49  
TGGGGATCCTTTGCCACAAATTGCTGGGCT  
>TADA1\_LsgRNA50  
CGCAGCAAACCTTGAAAACCCAAGGGAAA  
>TADA1\_LsgRNA51  
CAAGGCAAAGATCCAGCACCATCTAGGAGA  
>TADA1\_LsgRNA52  
TTTAGCACAGCAAAGCCCTCCTTGGCTG

>TADA1\_LsgRNA53  
ACCAGCACAGGGAGCAGTAAAAGCTGGAGG  
>TADA1\_LsgRNA54  
GGCTGCACTCCTGCTGGCATGCTCCGGAGA  
>TADA1\_LsgRNA55  
CTGAGCAGCAGGCTGCACTCCTGCTGGCAT  
>TADA1\_LsgRNA56  
TGCAGCCTGCTGCTCAGCATCATCAGGGGG  
>TADA1\_LsgRNA57  
TGCTGCTCAGCATCATCAGGGGGTGGGTGA  
>TADA1\_LsgRNA58  
TTTTGCTGCGGAACCCCTGGCCAAGGCAA  
>TADA1\_LsgRNA59  
ATGGGCTGGACAATGTCACCGAGGAGGCTG  
>TADA1\_LsgRNA60  
TGGTGCTGGATCTTTGCCTTGCCAGGGGG  
>TADA1\_LsgRNA61  
AGAAGCTGGATTCTGACCAGCACAGGGAGC  
>TADA1\_LsgRNA62  
GCCAGGAGGAAATCATTGTGAGAATGGACT  
>TADA1\_LsgRNA63  
TGCTGGATCTTTGCCTTGCCAGGGGGTTC  
>TADA1\_LsgRNA64  
GTAGGGATGACTTCCCTGTGCACCTGGGAT  
>TADA1\_LsgRNA65  
CCAGGGCCTCGCTTAAGTTCTTCTTGCCG  
>TADA1\_LsgRNA66  
GCCAGGGGGTTCCGCAGCAAAAACCTGGAAA  
>TADA1\_LsgRNA67  
TTCTGTTCGTCAGAAATTTGATGTAGGTTG  
>TADA1\_LsgRNA68  
AGCTGTTGTCTATGCTGTGGAGGTTGGTTT  
>TADA1\_LsgRNA69  
CAAAGTTTCAAGTCGTCATCATCTTGGGGA  
>TADA1\_LsgRNA70  
TATTGTTTCTGCCTCTGCAGATACTGGGCT  
>TADA1\_LsgRNA71  
ACACTATTCTTCAGGTATGGCTGCGGGGTC  
>TADA1\_LsgRNA72  
ACACTCTACCTGCATCTTTGCCTCCGGTGA  
>TADA1\_LsgRNA73  
ACTGTCTATGCTCTTAACATTGAAAGGATC  
>TADA1\_LsgRNA74  
ATCTTCTGCTTGAACACAGCTTTAGGTTA

>TADA1\_LsgRNA75  
 ATACTGACGTCAGTTGTGTCAAGAAGGAAA  
 >TADA1\_LsgRNA76  
 TGTGTGAGAAGTCTATGAGCTTCAAGGTCA  
 >TADA1\_LsgRNA77  
 CTGCTGCTCAGCATCATCAGGGGGTGGGTG  
 >TADA1\_LsgRNA78  
 GTCTTGCTGCAGCTCTTCATGATTTGGATG  
 >TADA1\_LsgRNA79  
 AGCCTGCTGCTCAGCATCATCAGGGGGTGG  
 >TADA1\_LsgRNA80  
 GTGCTGGATCTTTGCCTTGGCCAGGGGGTT  
 >TADA1\_LsgRNA81  
 GTTGTGTCAAGAAGGAAAGCTTATCGGTTA  
 >TADA1\_LsgRNA82  
 AGAGTGTCTCCGGAGCATGCCAGCAGGAGT  
 >TADA1\_LsgRNA83  
 AAGTTTCAAGTCGTCATCATCTTGGGGATC  
 >TADA1\_LsgRNA84  
 CATGTTACCCGGAGGCAAAGATGCAGGTAG  
 >TADA1\_LsgRNA85  
 ATATTTCTGTCTCCTAGATGGTGCTGGATC  
 >TADA1\_LsgRNA86  
 AAAGTTTCAAGTCGTCATCATCTTGGGGAT  
 >TADA1\_LsgRNA87  
 ATTGTTTCTGCCTCTGCAGATACTGGGCTA

(25)  $S_8^-$ : 51 low on-target activity sgRNAs targeting HPRT1

>HPRT1\_LsgRNA1  
 GGTGAAAAGGACCCACGAAGTGTGGATA  
 >HPRT1\_LsgRNA2  
 TGATAAAATCTACAGTCATAGGAATGGATC  
 >HPRT1\_LsgRNA3  
 AAAAAAGTAATTCACTTACAGTCTGGCTT  
 >HPRT1\_LsgRNA4  
 TTCCAAATCCTCAGCATAATGATTAGGTAT  
 >HPRT1\_LsgRNA5  
 TTTTAACTAGAATGACCAGTCAACAGGGGA  
 >HPRT1\_LsgRNA6  
 GCAAAAATAAATCAAGGTCATAACCTGGTTC  
 >HPRT1\_LsgRNA7  
 AAACAATGCAGACTTTGCTTTCCTTGGTCA  
 >HPRT1\_LsgRNA8  
 GTCAACAGGGGACATAAAAAGTAATTGGTGG

>HPRT1\_LsgRNA9  
TTTAACTAGAATGACCAGTCAACAGGGGAC  
>HPRT1\_LsgRNA10  
ATGCAGACTTTGCTTTCCTTGGTCAGGCAG  
>HPRT1\_LsgRNA11  
CGCCAGGGCTGCGGGTCGCCATAACGGAGC  
>HPRT1\_LsgRNA12  
TGAAATTCCAGACAAGTTTGTGTAGGATA  
>HPRT1\_LsgRNA13  
AATCCAAAGATGGTCAAGGTCGCAAGGTAT  
>HPRT1\_LsgRNA14  
AGCACACAGAGGGCTACAATGTGATGGCCT  
>HPRT1\_LsgRNA15  
TGCTCACCACGACGCCAGGGCTGCGGGTCG  
>HPRT1\_LsgRNA16  
TTTTTCAGATTAGTGATGATGAACCAGGTTA  
>HPRT1\_LsgRNA17  
TTTGCATACCTAATCATTATGCTGAGGATT  
>HPRT1\_LsgRNA18  
TGCTCGAGATGTGATGAAGGAGATGGGAGG  
>HPRT1\_LsgRNA19  
ATTCCTCATGGACTAATTATGGACAGGTAA  
>HPRT1\_LsgRNA20  
CAGTCTGATAAAATCTACAGTCATAGGAAT  
>HPRT1\_LsgRNA21  
TTACCTGTCCATAATTAGTCCATGAGGAAT  
>HPRT1\_LsgRNA22  
CTGGCTTATATCCAACACTTCGTGGGGTCC  
>HPRT1\_LsgRNA23  
TTTTCTTCTAGAATGTCTTGATTGTGGAAG  
>HPRT1\_LsgRNA24  
ATACCTTGCGACCTTGACCATCTTTGGATT  
>HPRT1\_LsgRNA25  
CCCTGAAGTATTCATTATAGTCAAGGGCAT  
>HPRT1\_LsgRNA26  
GGCCGAGCTGCTCACCACGACGCCAGGGCT  
>HPRT1\_LsgRNA27  
TGGAGATGATCTCTCAACTTTAACTGGAAA  
>HPRT1\_LsgRNA28  
TCGAGATGTGATGAAGGAGATGGGAGGCCA  
>HPRT1\_LsgRNA29  
TCTGGCTTATATCCAACACTTCGTGGGGTC  
>HPRT1\_LsgRNA30  
GTCTGGCTTATATCCAACACTTCGTGGGGT



>HPRT1\_LsgRNA31  
 AACAGGGGACATAAAAAGTAATTGGTGGAGA  
 >HPRT1\_LsgRNA32  
 CATTGTAGCCCTCTGTGTGCTCAAGGGGGG  
 >HPRT1\_LsgRNA33  
 TTCAGTGCTTTGATGTAATCCAGCAGGTCA  
 >HPRT1\_LsgRNA34  
 GCATGTTTGTGTCATTAGTGAAACTGGAAA  
 >HPRT1\_LsgRNA35  
 GCTATAAATTCTTTGCTGACCTGCTGGATT  
 >HPRT1\_LsgRNA36  
 TACCTAATCATTATGCTGAGGATTTGGAAA  
 >HPRT1\_LsgRNA37  
 ATTGTAGCCCTCTGTGTGCTCAAGGGGGG  
 >HPRT1\_LsgRNA38  
 TGATTAGGTATGCAAAATAAATCAAGGTCA  
 >HPRT1\_LsgRNA39  
 GGCATATCCTACAACAACTTGTCTGGAAT  
 >HPRT1\_LsgRNA40  
 TGTTTATTCTCATGGACTAATTATGGACA  
 >HPRT1\_LsgRNA41  
 CTGCTCACCACGACGCCAGGGCTGCGGGTC  
 >HPRT1\_LsgRNA42  
 ATGATCTCTCAACTTTAACTGGAAAGGTAT  
 >HPRT1\_LsgRNA43  
 AACGTCTTGCTCGAGATGTGATGAAGGAGA  
 >HPRT1\_LsgRNA44  
 TTTTTGAAAGGATATAATTGACACTGGCAA  
 >HPRT1\_LsgRNA45  
 TCCCTGAAGTATTCATTATAGTCAAGGGCA  
 >HPRT1\_LsgRNA46  
 CCCTTGACTATAATGAATACTTCAGGGATT  
 >HPRT1\_LsgRNA47  
 TCTTTGGATTATACTGCCTGACCAAGGAAA  
 >HPRT1\_LsgRNA48  
 ACATTGTAGCCCTCTGTGTGCTCAAGGGGG  
 >HPRT1\_LsgRNA49  
 GTAATTAACAGCTTGCTGGTGAAAAGGACC  
 >HPRT1\_LsgRNA50  
 ATCATTATGCTGAGGATTTGGAAAAGGGTGT  
 >HPRT1\_LsgRNA51  
 GCCCTTGACTATAATGAATACTTCAGGGAT

(26) S<sub>9</sub>: 123 low on-target activity sgRNAs targeting CUL3

>CUL3\_LsgRNA1  
GATGAAAAATATGTAAACAGCATTGGGAC  
>CUL3\_LsgRNA2  
CGTCAAAACTGGAAGGAATGTTTAGGGATA  
>CUL3\_LsgRNA3  
ATGAAAAATATGTAAACAGCATTGGGACC  
>CUL3\_LsgRNA4  
AAAAAACATGATATCTAAGTTAAAGGTAA  
>CUL3\_LsgRNA5  
CTCAAAAGCATGTCTTGGTGCTGGTGGGAT  
>CUL3\_LsgRNA6  
AGGTAAAGCTCTTGTCTTCTGAAGAAGGAGA  
>CUL3\_LsgRNA7  
CCGGAAAGGCCCGGATCCGCATCTTGGTGT  
>CUL3\_LsgRNA8  
ACCCAAATCAAAGGAAATAGAAAATGGTCA  
>CUL3\_LsgRNA9  
TAGAAACAATATTGGATAAAGCAATGGTCC  
>CUL3\_LsgRNA10  
AATCAACGGAAGAACCAATTGTAAAGGTGG  
>CUL3\_LsgRNA11  
TGATAAGCTGAAAAGGGAGTCAAAGGGGT  
>CUL3\_LsgRNA12  
TCTGAATATCTCAAAGCATGTCTTGGTGC  
>CUL3\_LsgRNA13  
TTTGAATCTTGACTCTGTGTAGTTGGATG  
>CUL3\_LsgRNA14  
AACCAATTGTAAAGGTGGTTGAAAGGGAAC  
>CUL3\_LsgRNA15  
CAGAACAAGAAGTAGAAACAATATTGGATA  
>CUL3\_LsgRNA16  
GAGCACCATGTCTGAATCTGAGCAAAGGCAC  
>CUL3\_LsgRNA17  
TCCGACCCAGAGAGGAAAGAAACAAGGCAG  
>CUL3\_LsgRNA18  
TTGAACGTTATTATAAACAACACTTGGCAA  
>CUL3\_LsgRNA19  
AAGGACTTATTGAGAGAGAATATTTGGCAC  
>CUL3\_LsgRNA20  
GAGGAGAGACTCACCGAAAGGCCCGGATC  
>CUL3\_LsgRNA21  
TTAAAGAGCATTAATATGGTCATCTGGAAA  
>CUL3\_LsgRNA22  
CATGAGATAGAAGCTGCTATAGTGCGGATA

>CUL3\_LsgRNA23  
CGGAAGGACACCAAGATGCGGATCCGGGCC  
>CUL3\_LsgRNA24  
ATTCAGGCAACATCTACAGGCAACTGGTGT  
>CUL3\_LsgRNA25  
TGTGAGTGTATGAGTTCCTATTTGAGGGAG  
>CUL3\_LsgRNA26  
TATGAGTTCCTATTTGAGGGAGCAAGGTAA  
>CUL3\_LsgRNA27  
ATCAATAAATAATGAGAGGTATTCAGGAGA  
>CUL3\_LsgRNA28  
TTCAATACGTTTCTTAATAACAACCTGGACT  
>CUL3\_LsgRNA29  
GACTATAGTAGAAATGGAGAATTCTGGGCT  
>CUL3\_LsgRNA30  
GAGAATATTTGGCACGAACACCTGAGGATC  
>CUL3\_LsgRNA31  
AGAAAATCCAGCGTAAGAATAACAGTGGTCT  
>CUL3\_LsgRNA32  
GGATATGATTGCAAGAGAGCGGAAAGGAGA  
>CUL3\_LsgRNA33  
GTGGATGTCAGTTCACGTCAAAACTGGAAG  
>CUL3\_LsgRNA34  
CGTTATTATAAACAACACTTGGCAAGGAGA  
>CUL3\_LsgRNA35  
CTCTATTATTAAGAGCATTAAATATGGTCA  
>CUL3\_LsgRNA36  
AGGTATTCAGGAGACCTGGAGTTGAGGTTG  
>CUL3\_LsgRNA37  
ATTTATTGATGATAAGCTGAAAAAGGGAGT  
>CUL3\_LsgRNA38  
ACGTCAAAACTGGAAGGAATGTTTAGGGAT  
>CUL3\_LsgRNA39  
TGAGCAAAGGCACGGGCAGCCGGAAGGACA  
>CUL3\_LsgRNA40  
CCCGCAATAGTTTGTTTAAAGAGACGGTCA  
>CUL3\_LsgRNA41  
ACTACACAGAGTCAAGATTCAAACAGGTAT  
>CUL3\_LsgRNA42  
ATGTCAGTTCACGTCAAAACTGGAAGGAAT  
>CUL3\_LsgRNA43  
AGCACATGAAGACTATAGTAGAAATGGAGA  
>CUL3\_LsgRNA44  
TAAACATGGAGAAAAGCTCTACACTGGACT

>CUL3\_LsgRNA45  
CGGTCATTGTTGAATGATTCCAGGAGGAAG  
>CUL3\_LsgRNA46  
GAACCCGCTGTGTTGGTTTACCACAGGCGA  
>CUL3\_LsgRNA47  
CTCGCCTGTGGTAAACCAACACAGCGGGTT  
>CUL3\_LsgRNA48  
TTTTTCGAGATCAAGTTGTACGTTATGGGTG  
>CUL3\_LsgRNA49  
TGGGCTAGTACATATGTTGAAAAATGGAAA  
>CUL3\_LsgRNA50  
AGCTCTATAGAAATGCATATACAATGGTTT  
>CUL3\_LsgRNA51  
ACAGCTCACACTCCAGCATCATATGGGTTC  
>CUL3\_LsgRNA52  
CCGTCTCTTTAAACAAACTATTGCGGGTGA  
>CUL3\_LsgRNA53  
AGATCTGCAGAACCCATATGATGCTGGAGT  
>CUL3\_LsgRNA54  
TCGCCTGTGGTAAACCAACACAGCGGGTTC  
>CUL3\_LsgRNA55  
AGCTCTTGT'TTCTGAAGAAGGAGAAGGAAA  
>CUL3\_LsgRNA56  
TTCCCTTTCAACCACCTTTACAATTGGTTC  
>CUL3\_LsgRNA57  
GAAAGAATCCTGTTGACTATATCCAGGTAA  
>CUL3\_LsgRNA58  
CTTGGAATGATCATCAAACAGCTATGGTGA  
>CUL3\_LsgRNA59  
CTAAGACCACTGTTATTCTTACGCTGGATT  
>CUL3\_LsgRNA60  
TCGAGACCTAAAATCATTAAACATCTGGCAA  
>CUL3\_LsgRNA61  
TTTTCGAGATCAAGTTGTACGTTATGGGTGT  
>CUL3\_LsgRNA62  
GTGTGAGCTGTCGACCACTGTGTTTGGCTA  
>CUL3\_LsgRNA63  
CCAAGATGCGGATCCGGGCCTTTCCGGTGA  
>CUL3\_LsgRNA64  
GGAAGATGGATCTGAAGTTGGTGTGGAGG  
>CUL3\_LsgRNA65  
TGCAGCACAATGTTCTAGTAGCGGAGGTGA  
>CUL3\_LsgRNA66  
AGATGCAGCACAATGTTCTAGTAGCGGAGG

>CUL3\_LsgRNA67  
GGCAGCCGGAAGGACACCAAGATGCGGATC  
>CUL3\_LsgRNA68  
TTCTGCCTTGTTTCTTTCTCTCTGGGTCG  
>CUL3\_LsgRNA69  
CCGTGCCTTTGCTCAGATTTCGACATGGTGC  
>CUL3\_LsgRNA70  
GACAGCTCACACTCCAGCATCATATGGGTT  
>CUL3\_LsgRNA71  
TAGGGCTCTAACAAGCTCTCTTTCAGGGAT  
>CUL3\_LsgRNA72  
ATAAGCTGAAAAAGGGAGTCAAAGGGGTAA  
>CUL3\_LsgRNA73  
TGGTGCTGGTGGGATGTTGCACTTTGGTGT  
>CUL3\_LsgRNA74  
AAGGGCTTATTGGATCTGAAGAGTAGGTTC  
>CUL3\_LsgRNA75  
GAGCGGAAAGGAGAAGTCGTAGACAGGTAA  
>CUL3\_LsgRNA76  
CAACGGAAGAACCAATTGTAAAGGTGGTTG  
>CUL3\_LsgRNA77  
GGAAGGACACCAAGATGCGGATCCGGGCCT  
>CUL3\_LsgRNA78  
AGATGGATCTGAAGTTGGTGTGGAGGTGC  
>CUL3\_LsgRNA79  
AGACGGTCATTGTTGAATGATTCCAGGAGG  
>CUL3\_LsgRNA80  
GTGTGTATGTACAACAAAATAATGTGGAGA  
>CUL3\_LsgRNA81  
CCATGTTCGAATCTGAGCAAAGGCACGGGCA  
>CUL3\_LsgRNA82  
TAATGTGGAGAACGTCTACAATTTGGGATT  
>CUL3\_LsgRNA83  
TTAGGTGGTGTGGATCTTACAGTCCGGGTG  
>CUL3\_LsgRNA84  
ATATGTGTATACTTTGCGATCCTCAGGTGT  
>CUL3\_LsgRNA85  
GTGAGTGTATGAGTTCCTATTTGAGGGAGC  
>CUL3\_LsgRNA86  
CGCTGTGTTGGTTTACCACAGGCGAGGGAC  
>CUL3\_LsgRNA87  
AGTTGTTATTAAGAAACGTATTGAAGGACT  
>CUL3\_LsgRNA88  
ATTGGTCTTCCGTTGATTTGTCAAGGCAG

>CUL3\_LsgRNA89  
TGGTGTGGAGGTGCACAAGTAACTGGCTC  
>CUL3\_LsgRNA90  
GCATTAATATGGTCATCTGGAAAGTGGAAA  
>CUL3\_LsgRNA91  
TTCTTACAAAAGAACCCAAATCAAAGGAAA  
>CUL3\_LsgRNA92  
GGTTTACCACAGGCGAGGGACTGTAGGGCT  
>CUL3\_LsgRNA93  
TTGTTACCGAACATCTCATAAATAAGGTAT  
>CUL3\_LsgRNA94  
TTGATACCTTATTTATGAGATGTTTCGGTAA  
>CUL3\_LsgRNA95  
TTTCTACTATAGTCTTCATGTGCTTGGAAA  
>CUL3\_LsgRNA96  
ATAATAGAGAAAAATACACATTTGAGGTAT  
>CUL3\_LsgRNA97  
AGAGTAGGTTTCGATCGCTTCCTCCTGGAAT  
>CUL3\_LsgRNA98  
ACTATAGTAGAAATGGAGAATTCTGGGCTA  
>CUL3\_LsgRNA99  
TATTTATTGATGATAAGCTGAAAAAGGGAG  
>CUL3\_LsgRNA100  
TATCTCAAAGCATGTCTTGGTGCTGGTGG  
>CUL3\_LsgRNA101  
GGGATCATCTACGGCAAACCTCTATTGGATA  
>CUL3\_LsgRNA102  
CGGATCCGCATCTTGGTGTCTTCCGGCTG  
>CUL3\_LsgRNA103  
CATGTCGAATCTGAGCAAAGGCACGGGCAG  
>CUL3\_LsgRNA104  
AAATTCTGCAGACATTTCCAAAAAAGGAGC  
>CUL3\_LsgRNA105  
TGGATGAATTCAGGCAACATCTACAGGCAA  
>CUL3\_LsgRNA106  
AATCTGAGCAAAGGCACGGGCAGCCGGAAG  
>CUL3\_LsgRNA107  
TTTCTGCCTTGTTTCTTTCTCTCTGGGTC  
>CUL3\_LsgRNA108  
CTATTGGATATGATTGCAAGAGAGCGGAAA  
>CUL3\_LsgRNA109  
CTGGTGGGATGTTGCACTTTGGTGTGGCTG  
>CUL3\_LsgRNA110  
TCTCTGGGTCGGATTACCTTGTTTGGCAG

>CUL3\_LsgRNA111  
 TAGGTGGTGTGATCTTACAGTCCGGGTGC  
 >CUL3\_LsgRNA112  
 AAGTTGTACGTTATGGGTGTATTAGGGATC  
 >CUL3\_LsgRNA113  
 ATAATGTGGAGAACGTCTACAATTTGGGAT  
 >CUL3\_LsgRNA114  
 GCCTTGTTCCTTCTCTCTGGGTCGGATT  
 >CUL3\_LsgRNA115  
 TTTTTTAAAAATGAAACAGGAAGATGGATC  
 >CUL3\_LsgRNA116  
 CAAGTTATTTAGTCGTGTGCCAAATGGTTT  
 >CUL3\_LsgRNA117  
 TTTCTTCAAACGCTAAATCAAGCTTGAAT  
 >CUL3\_LsgRNA118  
 ACGTTTCTTAATAACAACACTGGACTTGGTAA  
 >CUL3\_LsgRNA119  
 TATGTTGAAAAATGGAAAGACAGAAGGTAA  
 >CUL3\_LsgRNA120  
 CAAGTTGTACGTTATGGGTGTATTAGGGAT  
 >CUL3\_LsgRNA121  
 GAGCTTTACCTTGCTCCCTCAAATAGGAAC  
 >CUL3\_LsgRNA122  
 TCTTTTCTTGCATAAACCTAAAAAGGACC  
 >CUL3\_LsgRNA123  
 TTCTTTTGTAAGAACCCGCTGTGTTGGTTT

(27)  $S_{10}^-$ : 588 low on-target activity sgRNAs targeting NF1

>NF1\_LsgRNA1  
 AATAAAAAATAGGATTCCCAGCTTTGGAAG  
 >NF1\_LsgRNA2  
 TTCCAAAAATCTAACGTGAGGTGTGGCTC  
 >NF1\_LsgRNA3  
 TTAGAAAACATGTTCCAGAGCAGTTGGTAG  
 >NF1\_LsgRNA4  
 TCCTAAAAGGCAAGAAATGGAATCAGGGAT  
 >NF1\_LsgRNA5  
 GTGCAAAATTAACGACTCCTGAAGGGTA  
 >NF1\_LsgRNA6  
 AAGAAAACAGGGGCCGAAACCCAAGGCAG  
 >NF1\_LsgRNA7  
 CAGAAAAGAGTGATGGCACTGCTGAGGCGC  
 >NF1\_LsgRNA8  
 ACGAAAAGCTCTTGCTGGCCATGGAGGAAG

>NF1\_LsgRNA9  
ATCAAAAAGGAGATACTTACACAACAGGAAA  
>NF1\_LsgRNA10  
CCTAAAAGGCAAGAAATGGAATCAGGGATC  
>NF1\_LsgRNA11  
GATGAAAAGTGCGCAAACAGGTGGCAGGAAA  
>NF1\_LsgRNA12  
GTGGAAAATACCAGTCAAATGTCCATGGATC  
>NF1\_LsgRNA13  
GAGTAAATCCACTTACCTATAGGAAGGGTC  
>NF1\_LsgRNA14  
CAGGAAATCCATGAGCCTGGACATGGGGCA  
>NF1\_LsgRNA15  
TTCTAAATGACATTTATTATGCTTCGGAAA  
>NF1\_LsgRNA16  
TCATAAATTCCTCAAACCTTGAAGTGGTAA  
>NF1\_LsgRNA17  
AGACAACAAGAGCTCTTGGTTGCAGGGATG  
>NF1\_LsgRNA18  
TGGAAACAGTCACAGAAGCTTTGTTGGAGA  
>NF1\_LsgRNA19  
CTGTAACAGTGGACGAACTCGCCACGGATC  
>NF1\_LsgRNA20  
TTATAACCAAAGAAAACCTTGTATTTGGAAA  
>NF1\_LsgRNA21  
TCAAAAACCAGTGCAACAGGTGGCTTGGGAT  
>NF1\_LsgRNA22  
CATAAACCTGATGTCTCTAGTAACTGGCCC  
>NF1\_LsgRNA23  
GCTGAACTTCGGAATTCTGCCTCTGGGGTT  
>NF1\_LsgRNA24  
CTCTAACTTTAACTTTGCATTGGTTGGACA  
>NF1\_LsgRNA25  
AGGGAAGATGAGCTGCCACATCAAGGGAAT  
>NF1\_LsgRNA26  
AGGTAAGATGTTTGGTATTGTGGTGGGGAT  
>NF1\_LsgRNA27  
TGTAAGCAAGTACTTACATCAATTGGGAA  
>NF1\_LsgRNA28  
AGAAAAGCTATTTGACTTGGTGGATGGTTT  
>NF1\_LsgRNA29  
TACCAAGCTGGGACTTCCAAAGCTGGGAAT  
>NF1\_LsgRNA30  
GGGTAAGGAGATGTGGGAGTCAGGAGGGAT



>NF1\_LsgRNA31  
ACTGAAGGCAGCTCTGAACATCTAGGGCAA  
>NF1\_LsgRNA32  
CTGCAAGGTATCCTTCAGAACCTTTGGGAG  
>NF1\_LsgRNA33  
GTAAAATAATGACATTCTGTTTCAAGGTTT  
>NF1\_LsgRNA34  
CAAAAATATGGGGAAGCCTTGGGCAGGTAT  
>NF1\_LsgRNA35  
AGGAAATCCATGAGCCTGGACATGGGGCAA  
>NF1\_LsgRNA36  
TTTTAATGGCTTGTGGCGGTTTGCAGGACC  
>NF1\_LsgRNA37  
CCAAAATGTTTCTACAGGAGCATCAGGATT  
>NF1\_LsgRNA38  
AATTAATTACAGGGCTCGTCCAACCTGGTCC  
>NF1\_LsgRNA39  
TTTGAATTCTGTAGAAGTTATTTCTGGACA  
>NF1\_LsgRNA40  
TCCAAATTTGTTAAATCCAATCCATGGAAT  
>NF1\_LsgRNA41  
CTTAACAATAAGCTCAGCATAGTCTGGAAT  
>NF1\_LsgRNA42  
TCTGACACAGACTCCCTACAGGAATGGATC  
>NF1\_LsgRNA43  
AGGCACACTCCCCAAGGGCACAAAGGAAG  
>NF1\_LsgRNA44  
GGATACACTGGAAAAATGTCTTGCTGGGGT  
>NF1\_LsgRNA45  
TGAAACACTTCATAAAGCAGTGCAAGGTTG  
>NF1\_LsgRNA46  
ACTGACACTTCATCCACCCCACACCGGATA  
>NF1\_LsgRNA47  
AAGTACAGAAGAAGCTGACCATAGAGGAGT  
>NF1\_LsgRNA48  
ACTAACCAAGCAACTTCTTAGTGTTGGCCT  
>NF1\_LsgRNA49  
CCCTACCACTGGCCACTGTAACAGTGGACG  
>NF1\_LsgRNA50  
GGCAACCAGAACAGCTTCAGTGTGAGGGTT  
>NF1\_LsgRNA51  
GGAAACCAGCATGCAGCTGAACTTCGGAAT  
>NF1\_LsgRNA52  
CAAAACCAGTGCAACAGGTGGCTTGGGATC

>NF1\_LsgRNA53  
CTCCACCATTCTATAGGAATAAGATGGTAG  
>NF1\_LsgRNA54  
CTAGACCCACCAGATCCTTAACATTGGTCC  
>NF1\_LsgRNA55  
TCTTACCGGTGCCATTTCGTATTGCTGGGTG  
>NF1\_LsgRNA56  
GCATACCTCAGTGTTTCCTGCAGTGGGATG  
>NF1\_LsgRNA57  
AATGACCTGTCCCGGTAACCTGGAACGGAAG  
>NF1\_LsgRNA58  
GTTACCTTAACCATTGCAAACCAGGGCAC  
>NF1\_LsgRNA59  
TTGTACCTTTAATTTAAAAATCGAGGGCCA  
>NF1\_LsgRNA60  
AAATACGGACCAATGTTAAGGATCTGGTGG  
>NF1\_LsgRNA61  
GACCACGGCCTGGACCCATTCCACCGGCCT  
>NF1\_LsgRNA62  
GGAAACGTGGCATGTCTCGGAGGCTGGCAT  
>NF1\_LsgRNA63  
CCTTACGTTCACTGACTGGACCCATGGGTG  
>NF1\_LsgRNA64  
TTCAACGTTCTCCTTGTTCGATTCTGGAGA  
>NF1\_LsgRNA65  
GGAGACGTTGTCGTAAGCAAAGCCAGGAAA  
>NF1\_LsgRNA66  
TCTTACTAATAGAGACAATAAAGAGGGTGT  
>NF1\_LsgRNA67  
GAGAACTCCCTATAGCGATGGCTCTGGCCA  
>NF1\_LsgRNA68  
AGACACTGAAACTTTACGTAAATGTGGGTG  
>NF1\_LsgRNA69  
TCAGACTGAGTCTCAAACTTGCTTGGTCT  
>NF1\_LsgRNA70  
AGATACTGCTGTAGCTTTGGCTTCTGGAAA  
>NF1\_LsgRNA71  
CATGACTGGCTTCCTTTGTGCCCTTGGGGG  
>NF1\_LsgRNA72  
TCTGACTGTTCTTGCAACAATAGCAGGTGA  
>NF1\_LsgRNA73  
AAGTACTTACTGATCCGAAGATCCAGGCGC  
>NF1\_LsgRNA74  
TGGAACTTACTTTAATAGAACTTTGGTGT

>NF1\_LsgRNA75  
CAGAACTTGACTGTTGTAAGTGCAGGTCC  
>NF1\_LsgRNA76  
TCAAACCTTGAAGTGGTAAGGTTAAGGCTG  
>NF1\_LsgRNA77  
GTGCAGAAAAGCTATTTGACTTGGTGGATG  
>NF1\_LsgRNA78  
CATGAGAAAGTGGGACTTCAAATACGGACC  
>NF1\_LsgRNA79  
GCACAGAAATTCTCAAGTGGTTGCGGGAAA  
>NF1\_LsgRNA80  
TAAGAGAACACTTTACCTGTCCCTGGGAGT  
>NF1\_LsgRNA81  
AGTAAGAAGCAGCGCCTGGATCTTCGGATC  
>NF1\_LsgRNA82  
TCACAGAAGCTTTGTTGGAGATCATGGAGG  
>NF1\_LsgRNA83  
AACCAAGAGCTCTTGTTGCAGGGATGGATT  
>NF1\_LsgRNA84  
GGTAAGATGTTTGGTATTGTGGTGGGGATT  
>NF1\_LsgRNA85  
CAGAAGATTATAGGCAGCTGACCTAGGAGA  
>NF1\_LsgRNA86  
TCAGAGATTTGGACCAGGCAAGCATGGAAG  
>NF1\_LsgRNA87  
TCAAAGCAAAGTCTCTCTCATAGGAGC  
>NF1\_LsgRNA88  
GTAAAGCAAGTACTTACATCAATTGGGAAG  
>NF1\_LsgRNA89  
GTGGAGCACACCCAGCAATACGAATGGCAC  
>NF1\_LsgRNA90  
GAGTAGCAGAACTGATTATGAAATGGGTG  
>NF1\_LsgRNA91  
AGGAAGCAGATATCCGGTGTGGGGTGGATG  
>NF1\_LsgRNA92  
GAATAGCAGTAACTCTTTGTCGTTTGGCAT  
>NF1\_LsgRNA93  
TGTAAGCATAACCTGGTATAAACAGTGGCAC  
>NF1\_LsgRNA94  
GCACAGCCACAGCTACCCAAAAGAGGGCTT  
>NF1\_LsgRNA95  
CCCGAGCCAGGAAATCCATGAGCCTGGACA  
>NF1\_LsgRNA96  
GACAAGCCCAGACCAAACCTAGAAGTGCC

>NF1\_LsgRNA97  
CTATAGCGATGGCTCTGGCCAATGTGGTTC  
>NF1\_LsgRNA98  
TTAAAGCGATTGCTAGGCCCGGTATGGGTA  
>NF1\_LsgRNA99  
ATAAAGCTACAGTAAAAGAAAAAAGGAAA  
>NF1\_LsgRNA100  
ACTAAGCTGGCTCTGCAGTGCAGGAGGGTA  
>NF1\_LsgRNA101  
ACAAAGCTTCTGTGACTGTTTCCAAGGATG  
>NF1\_LsgRNA102  
CAGAAGCTTTGTTGGAGATCATGGAGGTAT  
>NF1\_LsgRNA103  
CCAGAGGAAGTATTTATGGCAATCCGGAAT  
>NF1\_LsgRNA104  
ATCAAGGAGAACTCCCTATAGCGATGGCTC  
>NF1\_LsgRNA105  
AAGAAGGAGATGGTGTGGAATTGATGGAAG  
>NF1\_LsgRNA106  
GGTAAGGAGATGTGGGAGTCAGGAGGGATT  
>NF1\_LsgRNA107  
TTCCAGGCAGGTACGTGTCAATCAAGGCAT  
>NF1\_LsgRNA108  
CAAGAGGCAGTCAGCCTGCAGATGTGGATC  
>NF1\_LsgRNA109  
TAAGAGGCGAATGTCCCATGTGAGTGGAGG  
>NF1\_LsgRNA110  
TTGCAGGTAAGATGTTTGGTATTGTGGTGG  
>NF1\_LsgRNA111  
TGCAAGGTATCCTTCAGAACCTTTGGGAGA  
>NF1\_LsgRNA112  
GGTAAGGTCCACTACAATTTTCATATGGCTT  
>NF1\_LsgRNA113  
ACAAAGGTGTTTCAATTCAATACCTGGAAA  
>NF1\_LsgRNA114  
AGGGAGTACACCAAGTATCATGAGCGGCTG  
>NF1\_LsgRNA115  
AGGCAGTACAGCAGAATTAATTACAGGGCT  
>NF1\_LsgRNA116  
TGGGAGTCAGGAGGGATTCTTCACTGGTTT  
>NF1\_LsgRNA117  
TCATAGTCTTTCCTTCATAAGTGACGGCAA  
>NF1\_LsgRNA118  
AGACAGTGGTCTCATGCACTCCATAGGTGA

>NF1\_LsgRNA119  
GAGCAGTGTCCCAGGGACATCTTTTGGCCG  
>NF1\_LsgRNA120  
AAGAAGTGTGGCCATCTTATCAAAAAGGTCCG  
>NF1\_LsgRNA121  
CATCAGTTAGATAGCATTGATTTGTGGAAT  
>NF1\_LsgRNA122  
TAGCAGTTATAAATAGCCTGGAAAAGGTAA  
>NF1\_LsgRNA123  
GACAATAAAGAGGGTGTGTTGGCAGGGAT  
>NF1\_LsgRNA124  
ATCTATAACTGTAACCTCTGGGTCAGGGAG  
>NF1\_LsgRNA125  
CCACATAAGATGTTGTTCTAAAGTAGGAGT  
>NF1\_LsgRNA126  
CTATATAGGTATGTTTCGTGTGCTTGGGAAT  
>NF1\_LsgRNA127  
GTCTATATCTATAACTGTAACCTCTGGGTC  
>NF1\_LsgRNA128  
TTTCATCAAAACCAGTGCAACAGGTGGCTT  
>NF1\_LsgRNA129  
TGGGATCAATAAAAAGCTGAGGTGATGGCAG  
>NF1\_LsgRNA130  
ATTCATCATGGTGACCCTTCCTATAGGTAA  
>NF1\_LsgRNA131  
GTCAATCATTAGATCCACATCTGCAGGCTG  
>NF1\_LsgRNA132  
ACCCATCTATTCAAGCAAAAATATGGGGAA  
>NF1\_LsgRNA133  
CCTAATCTCCAAAATGTTTCTACAGGAGC  
>NF1\_LsgRNA134  
CCCTATCTTGCTGCAGAACTCAGAGGATT  
>NF1\_LsgRNA135  
TTGGATCTTGGCACAATGATAACAGGGTGT  
>NF1\_LsgRNA136  
CTTCATGATCCATGGACATTTGACTGGTAT  
>NF1\_LsgRNA137  
GATGATGATGTAAAATGTCTTACAAGGTAA  
>NF1\_LsgRNA138  
CCTGATGCTCCTGTAGAAACATTTTGGGAG  
>NF1\_LsgRNA139  
GGGAATGCTGGGAAGTTGCAAGTGAGGTCA  
>NF1\_LsgRNA140  
CTGCATGCTGGTTTCCTTCACGACAGGTGT

>NF1\_LsgRNA141  
GCCAATGTCCCATGTGAGTGGAGGAGGATC  
>NF1\_LsgRNA142  
CTCTATGTGCTCAGCCAGTTTCCAGGACA  
>NF1\_LsgRNA143  
GTAAATGTGGGTGCTGTTGTGATGAGGAAA  
>NF1\_LsgRNA144  
GCCAATGTGGTTCCTTGTTCTCAGTGGGTA  
>NF1\_LsgRNA145  
ATGAATGTGTTATAGTTGGGCAAGAGGTTA  
>NF1\_LsgRNA146  
CCTTATTAAGAAGTGGCTGTAATTTGGTTA  
>NF1\_LsgRNA147  
CCAAATTACAGCCACTTCTTAATAAGGTAA  
>NF1\_LsgRNA148  
GTGTATTAGCAAACGAGTGTCTCATGGGCA  
>NF1\_LsgRNA149  
CCGGATTGCCATAAATACTTCTCTGGACT  
>NF1\_LsgRNA150  
TGCCATTGTCTCACCGTATGAAGCAGGGAT  
>NF1\_LsgRNA151  
TGGTATTGTGGTGGGGATTCTTCATGGTAC  
>NF1\_LsgRNA152  
CGGCATTTACTCTACCAACTGCTCTGGAAC  
>NF1\_LsgRNA153  
TATGATTTTCAGTGATGTCTTCAGAGGGAAA  
>NF1\_LsgRNA154  
TAAAATTTGATTTGTTGCAGGTTTTGGTTT  
>NF1\_LsgRNA155  
CAAGCAAAAATATGGGGAAGCCTTGGGCAG  
>NF1\_LsgRNA156  
TACCCAAAAGAGGGCTTTGTGCAGAGGCGA  
>NF1\_LsgRNA157  
TGCGCAAACAGGTGGCAGGAAACGTGGCAT  
>NF1\_LsgRNA158  
GTGTCAAATTCTGTGCCTTGTGAAGGATT  
>NF1\_LsgRNA159  
AAGACAACAAGAGCTCTTGGTTGCAGGGAT  
>NF1\_LsgRNA160  
CAACCAAGAGCTCTTGTGTCTTTGGGTGT  
>NF1\_LsgRNA161  
CTAGCAAGTTCTTCATTATAGCTATGGTTT  
>NF1\_LsgRNA162  
ATGGCAATCCGGAATCCTCTGGAGTGGCAC

>NF1\_LsgRNA163  
GAAACAATGATGTTAAATCTGGTCAGGTAA  
>NF1\_LsgRNA164  
ATCACAAATTCGTAATAAAGGATCCAGGAGT  
>NF1\_LsgRNA165  
GTGGCACACACTTCGAAGTTGAGGGGGGAA  
>NF1\_LsgRNA166  
TTGACACACTTGCAGAAACAGTATTGGCTG  
>NF1\_LsgRNA167  
ATATCACATCCTACCCCGTAAAAAAGGAGA  
>NF1\_LsgRNA168  
CAAGCACATTGCCGTCACCTTATGAAGGAAA  
>NF1\_LsgRNA169  
AGTTCACCTTAACCATTGCAAACCAGGGCA  
>NF1\_LsgRNA170  
CCTTCACGACAGGTGTGAAGAAAATGGCAG  
>NF1\_LsgRNA171  
AGGACACTAAAGGAGACTCAGCCATGGTCC  
>NF1\_LsgRNA172  
GATACACTGGAAAAATGTCTTGCTGGGGTA  
>NF1\_LsgRNA173  
CTTGCAGAAACAGTATTGGCTGATCGGTTT  
>NF1\_LsgRNA174  
AGCACAGAAATTCTCAAGTGGTTGCGGGAA  
>NF1\_LsgRNA175  
CCCTCAGAACAGCATCGGTGCAGTAGGAAG  
>NF1\_LsgRNA176  
AGGCCAGAATTGCTTCTCTGCTGGAGGCAC  
>NF1\_LsgRNA177  
ATATCAGACACAAAGGCTCCTAAAAGGCAA  
>NF1\_LsgRNA178  
TCAGCAGAGCGAACAAGTCCCTAGGGCAA  
>NF1\_LsgRNA179  
TACACAGAGCGTGGCCTACTTAGCAGGTAA  
>NF1\_LsgRNA180  
CAGTCAGCAGCCGCTCATGATACTTGGTGT  
>NF1\_LsgRNA181  
AGCACAGCCACAGCTACCCAAAAGAGGGCT  
>NF1\_LsgRNA182  
GACTCAGCCATGGTCCTCTCCCAAAGGTTC  
>NF1\_LsgRNA183  
TTCCCAGCTTTGGAAGTCCCAGCTTGGTAG  
>NF1\_LsgRNA184  
GAGCCAGGAGAGAATGACCTGTCCCGGTAA

>NF1\_LsgRNA185  
GGAACAGGTACCTTGCTAAGAATACGGATT  
>NF1\_LsgRNA186  
CCTTCAGGTCCTCTTCTAAAGCCAAGGTGG  
>NF1\_LsgRNA187  
CCGACAGTTGGATAGGTGGCTGCAAGGTAT  
>NF1\_LsgRNA188  
ACTTCATAAAGCAGTGCAAGGTTGTGGAGC  
>NF1\_LsgRNA189  
TTTTTCATAGACTGTCCTGGGAACTGGCTG  
>NF1\_LsgRNA190  
TACCCATCTATTCAAGCAAAAATATGGGGA  
>NF1\_LsgRNA191  
AGTGCATGAGACCACTGTCTACGTTGGCAT  
>NF1\_LsgRNA192  
AGGACATGGCCGCGCACAGGCCGGTGAAT  
>NF1\_LsgRNA193  
CTATCATTCATATCCGGACCCGCTGGGAAC  
>NF1\_LsgRNA194  
TTAACATTCTTTAAAATAGTAGTGAGGCCG  
>NF1\_LsgRNA195  
CTATCCAAAAGCCAAAATGGAAGATGGCCA  
>NF1\_LsgRNA196  
AATGCCAAACAGCAAGTAAAATTTGGGTAA  
>NF1\_LsgRNA197  
AGCACCAAACGTAAAGCAGCAGTTTGGCCA  
>NF1\_LsgRNA198  
GTGGCCAAACTGCTGCTTTACGTTTGGTGC  
>NF1\_LsgRNA199  
GCAACCAAGAGCTCTTGTTGTCTTTGGGTG  
>NF1\_LsgRNA200  
TAATCCAAGTAAGCCATTCTCAAGAGGCAG  
>NF1\_LsgRNA201  
TACACCACACTCTGCACAATTCCATGGATT  
>NF1\_LsgRNA202  
GCAACCAGAACAGCTTCAGTGTGAGGGTTC  
>NF1\_LsgRNA203  
ATCTCCAGACAAGAGCTACATTTATGGAAG  
>NF1\_LsgRNA204  
TGTACCAGATCCCACAGACTGATATGGCTG  
>NF1\_LsgRNA205  
TAATCCAGGATATATCCAAAGACGTGGTTG  
>NF1\_LsgRNA206  
ACTTCCATAAATGTAGCTCTTGTCTGGAGA



>NF1\_LsgRNA207  
CCAGCCATATCAGTCTGTGGGATCTGGTAC  
>NF1\_LsgRNA208  
GGACCCATTCCACCGCCTGTGCGCGGCCA  
>NF1\_LsgRNA209  
CACACCCAGCAATACGAATGGCACCGGTAA  
>NF1\_LsgRNA210  
CAAGCCCCTTTTCGATTCTAGGTGGTGGCTT  
>NF1\_LsgRNA211  
GGAACCTGACACTGAAGCTGTTCTGGTTG  
>NF1\_LsgRNA212  
TTTTCCCTTCCGGAGAGAGGCTCCAGGAGT  
>NF1\_LsgRNA213  
ATGGCCGCGCACAGGCCGGTGAATGGGTC  
>NF1\_LsgRNA214  
CTTACCGGTGCCATTTCGTATTGCTGGGTGT  
>NF1\_LsgRNA215  
AATTCCTCAAACCTTTGAACTGGTAAGGTTA  
>NF1\_LsgRNA216  
GGAGCCTCTCTCCGGAAGGGAAAAGGGAAC  
>NF1\_LsgRNA217  
ACTGCCTCTTGAGAATGGCTTACTTGGATT  
>NF1\_LsgRNA218  
AAATCCTGCTTCTTTACAGGTTATTGGAAG  
>NF1\_LsgRNA219  
TACTCCTGGAGCCTCTCTCCGGAAGGGAAA  
>NF1\_LsgRNA220  
TTAACCTTACCAGTTCAAAGTTTGAGGAAT  
>NF1\_LsgRNA221  
TCTACGAAAAGCTCTTGCTGGCCATGGAGG  
>NF1\_LsgRNA222  
AAAACGAACTAGATTTGACAGCCATGGAGT  
>NF1\_LsgRNA223  
TCGTGGAAGCGGCTGACCACGGCCTGGACC  
>NF1\_LsgRNA224  
GAGGCGAATGTCCCATGTGAGTGGAGGAGG  
>NF1\_LsgRNA225  
AATGCGATATTGAGCAGTGTCCAGGGACA  
>NF1\_LsgRNA226  
CAGCCGATCCATAAATTTGCTGACAGGTGT  
>NF1\_LsgRNA227  
GAGGCGCATTGAGCATCCCACTGCAGGAAA  
>NF1\_LsgRNA228  
CCAGCGCTTCTTTGCTTCTGCACTTGGCTT

>NF1\_LsgRNA229  
TGAGCGGCTGCTGACTGGCCTCAAAGGTAG  
>NF1\_LsgRNA230  
TTACCGGGACAGGTCATTCTCTCCTGGCTC  
>NF1\_LsgRNA231  
GGGCCGGTTACCTGCTCGTCTGAAGCGGCTG  
>NF1\_LsgRNA232  
CCTCCGTGCAACATAATAAAAAATAGGATT  
>NF1\_LsgRNA233  
CCAACGTGCAAGTGGCTGGACCAGTGGACA  
>NF1\_LsgRNA234  
TATTTCGTGCATTTCTGTAGGTATATGGTGC  
>NF1\_LsgRNA235  
CTTACGTTCACTGACTGGACCCATGGGTGG  
>NF1\_LsgRNA236  
CCAGCGTTTCCCTCAGAACAGCATCGGTGC  
>NF1\_LsgRNA237  
ACTGCTAACTGCGCAACCTTCTTTAGGGCT  
>NF1\_LsgRNA238  
GATACTAAGCTGGCTCTGCAGTGCAGGAGG  
>NF1\_LsgRNA239  
GAAACTACTGCTTCCATGCTTGCCTGGTCC  
>NF1\_LsgRNA240  
ACTTCTAGTTTGGTCTGGGCTTGTCGGCAA  
>NF1\_LsgRNA241  
CTTACTCAATGCCAACGTAGACAGTGGTCT  
>NF1\_LsgRNA242  
CTTCTCACAGAGGTGGCGGAAACAGGACA  
>NF1\_LsgRNA243  
AGAACTCACCTAAATTTTCATCTCTTGGCAA  
>NF1\_LsgRNA244  
CAGGCTCATGGATTTCTGGCTCGGGGACT  
>NF1\_LsgRNA245  
CTTTCTCATGGTTACACACCATTAAGGACA  
>NF1\_LsgRNA246  
GTGCCTCCAGCAGAGAAGCAATTCTGGCCT  
>NF1\_LsgRNA247  
CAAACCTCCATGAATGTGTTATAGTTGGGCA  
>NF1\_LsgRNA248  
TGGTCTCCCTCTGCAGCCTGAAAGAAGGAGA  
>NF1\_LsgRNA249  
CCATCTCCTTCTTCAGGCTGCAGAGGGAGA  
>NF1\_LsgRNA250  
ATGTCTCGGAGGCTGGCATCACTGAGGCAC

>NF1\_LsgRNA251  
TCAACTCTAACTTTAACTTTGCATTGGTTG  
>NF1\_LsgRNA252  
CACACTCTGCACAATTCCATGGATTGGATT  
>NF1\_LsgRNA253  
CTGGCTCTGCAGTGCAGGAGGGTAAGGAGA  
>NF1\_LsgRNA254  
GTAGCTCTTGTCTGGAGATCCTTGTGGTAA  
>NF1\_LsgRNA255  
GACACTGAACTTTACGTAAATGTGGGTGC  
>NF1\_LsgRNA256  
CCCCTGAGAACAAGGAACACATTGGCCA  
>NF1\_LsgRNA257  
CCTACTGCACCGATGCTGTTCTGAGGGAAA  
>NF1\_LsgRNA258  
CCCTCTGCAGCCTGAAGAAGGAGATGGTGT  
>NF1\_LsgRNA259  
ATATCTGCTTCCTCACAGAGGTGGCGGAAA  
>NF1\_LsgRNA260  
CTGACTGGCCTCAAAGGTAGCAAAGGCTT  
>NF1\_LsgRNA261  
ATGACTGGCTTCCTTTGTGCCCTTGGGGGA  
>NF1\_LsgRNA262  
TGGTCTGGGCTTGTTCGGCAAATCGGGGGG  
>NF1\_LsgRNA263  
TTCCTGTTTTCTTCATCAATTCCAGGCAG  
>NF1\_LsgRNA264  
ACACCTGTCAGCAAATTTATGGATCGGCTG  
>NF1\_LsgRNA265  
TCCACTGTTACAGTGGCCAGTGGTAGGGGA  
>NF1\_LsgRNA266  
TTTACTTAAGAAATAACTGTGATTTGGCTT  
>NF1\_LsgRNA267  
AATACTTACACAAAGCAAGAGCTTTGGATC  
>NF1\_LsgRNA268  
TGTCCCTCAACAATTCCTTGATGTGGCAG  
>NF1\_LsgRNA269  
TCAACTTCACTGCAGTCATTCAAAGGTTT  
>NF1\_LsgRNA270  
CCTGCTTCTTTACAGGTTATTGGAAGGATG  
>NF1\_LsgRNA271  
TGTTCTTGCAACAATAGCAGGTGAAGGATG  
>NF1\_LsgRNA272  
TTTCCTTGCAGAATCCAAGAAAACAGGGGC

>NF1\_LsgRNA273  
GTGGCTTGGGATCAATAAAAGCTGAGGTGA  
>NF1\_LsgRNA274  
GATACTTGGTGTACTCCCTGACCCAGGAGT  
>NF1\_LsgRNA275  
CCTACTTTAGAACAACATCTTATGTGGGAT  
>NF1\_LsgRNA276  
AGGGCTTTGTGCAGAGGCGAGTCCTGGCAA  
>NF1\_LsgRNA277  
ATGTGAAAAGATGACAAACCTGGTAGGATC  
>NF1\_LsgRNA278  
CCAGGAAATCCATGAGCCTGGACATGGGGC  
>NF1\_LsgRNA279  
ACTAGAACAGTAAGAAGCAGCGCCTGGATC  
>NF1\_LsgRNA280  
CATAGAACCCTTACGTTCACTGACTGGACC  
>NF1\_LsgRNA281  
AGCTGAACTTCGGAATTCTGCCTCTGGGGT  
>NF1\_LsgRNA282  
TCATGAAGAATTACTACGTACTCCTGGAGC  
>NF1\_LsgRNA283  
AGTTGAAGATGAAAGTGCGCAAACAGGTGG  
>NF1\_LsgRNA284  
TACTGAAGGCAGCTCTGAACATCTAGGGCA  
>NF1\_LsgRNA285  
ATAGGAAGGGTCACCATGATGAATGGGATA  
>NF1\_LsgRNA286  
GAGAGAATGACCTGTCCCGTAACTGGAAC  
>NF1\_LsgRNA287  
TAGAGACAATAAAGAGGGTGTGTTGGCAG  
>NF1\_LsgRNA288  
TACGGACCAATGTTAAGGATCTGGTGGGTC  
>NF1\_LsgRNA289  
GCTGGACCAGTGTGTATCTGCCACAGGTTT  
>NF1\_LsgRNA290  
CCTTGA CTCTCAGGATAGTGCAGCAGGATG  
>NF1\_LsgRNA291  
GAAAGACTTTGGGAAACACAACACTGGCCT  
>NF1\_LsgRNA292  
ATAAGAGAACACTTTACCTGTCCCTGGGAG  
>NF1\_LsgRNA293  
GCCTGAGAAGGTTGCCCATGTCCAGGCTC  
>NF1\_LsgRNA294  
AGCTGAGAGAAAATAAAACCCCAGAGGCAG

>NF1\_LsgRNA295  
ATGAGAGATATTCCAACGTGCAAGTGGCTG  
>NF1\_LsgRNA296  
TTGAGAGCATTGTGGAATACCTTCAGGTCC  
>NF1\_LsgRNA297  
CTGTGAGGAAGCAGATATCCGGTGTGGGGT  
>NF1\_LsgRNA298  
TGATGAGGTCAACTTGTATTCAGCAGGTAC  
>NF1\_LsgRNA299  
AGGAGAGTAAATCCACTTACCTATAGGAAG  
>NF1\_LsgRNA300  
AATAGAGTCCAGAGGAAGTATTTATGGCAA  
>NF1\_LsgRNA301  
TGGCGAGTTCGTCCACTGTTACAGTGGCCA  
>NF1\_LsgRNA302  
AGCAGATAATCCGTATTCTTAGCAAGGTAC  
>NF1\_LsgRNA303  
TATGGATACATATCCCATTTCATCATGGTGA  
>NF1\_LsgRNA304  
TCCAGATACATTTATTTACTTTGCAGGTAA  
>NF1\_LsgRNA305  
TTTGGATATATCCTGGATTATTTCTGGACA  
>NF1\_LsgRNA306  
TTTGGATCTTGGCACAATGATAACAGGGTG  
>NF1\_LsgRNA307  
TGAAGATGAAAGTGCGCAAACAGGTGGCAG  
>NF1\_LsgRNA308  
ATTGGATTTAACAAATTTGGATCTTGGCAC  
>NF1\_LsgRNA309  
CTATGATTTTCAGTGATGTCTTCAGAGGGAA  
>NF1\_LsgRNA310  
TCAAGCAAAAATATGGGGAAGCCTTGGGCA  
>NF1\_LsgRNA311  
TTGAGCAAACCTCAATACCTGCCCAAGGCTT  
>NF1\_LsgRNA312  
GATGGCAACACTTCTTGCATACCTGGGTCC  
>NF1\_LsgRNA313  
ATTGGCAACATGTTAGCTTTGAAGTGGATC  
>NF1\_LsgRNA314  
CCTGGCAACCTATAGCCCACCCATGGGTCC  
>NF1\_LsgRNA315  
ACTTGCAACTTCCCAGCATTCCCCAGGTCA  
>NF1\_LsgRNA316  
AAAAGCAACTTTGATGCAGCACGCAGGTAA

>NF1\_LsgRNA317  
AGTGGCACACACTTCGAAGTTGAGGGGGGA  
>NF1\_LsgRNA318  
AAAGGCACTTGAGAGTTGCTTAAAAGGACC  
>NF1\_LsgRNA319  
TTCTGCACTTGGCTTGGGATCCGTGGCGA  
>NF1\_LsgRNA320  
AGTAGCAGAAACTGATTATGAAATGGGTGA  
>NF1\_LsgRNA321  
TCCAGCAGAGAAGCAATTCTGGCCTGGCAA  
>NF1\_LsgRNA322  
TTCAGCAGAGCGAACAAAAGTCCTAGGGCA  
>NF1\_LsgRNA323  
GGTGGCAGGAAACGTGGCATGTCTCGGAGG  
>NF1\_LsgRNA324  
CAGTGCAGGAGGGTAAGGAGATGTGGGAGT  
>NF1\_LsgRNA325  
GGAAGCAGTAGTTTCACTTCTAGCTGGTCT  
>NF1\_LsgRNA326  
TAATGCCAAACAGCAAGTAAAATTTGGGTA  
>NF1\_LsgRNA327  
TCAGGCCAACACTAAGAAGTTGCTTGGTTA  
>NF1\_LsgRNA328  
ATCTGCCACAGGTTTGTGCTCTGGAGGACC  
>NF1\_LsgRNA329  
AAAAGCCACCACCTAGAATCGAAAGGGGCT  
>NF1\_LsgRNA330  
GTCCGCCAGACCAGTCCCCGAGCCAGGAAA  
>NF1\_LsgRNA331  
TCTTGCCCAACTATAACACATTCATGGAGT  
>NF1\_LsgRNA332  
GCACGCCGCTCACCTTCATGCACCAGGAGT  
>NF1\_LsgRNA333  
TGTTGCCTCGGAAGAGAGTCTGCATGGAGT  
>NF1\_LsgRNA334  
TGGAGCCTCTCTCCGGAAGGGAAAAGGGAA  
>NF1\_LsgRNA335  
TGCAGCCTGAAGAAGGAGATGGTGTGGAAT  
>NF1\_LsgRNA336  
TAATGCGATATTGAGCAGTGTCCCAGGGAC  
>NF1\_LsgRNA337  
TAAAGCGATTGCTAGGCCCGGTATGGGTAA  
>NF1\_LsgRNA338  
CAAAGCTAACATGTTGCCAATCAGAGGATG

>NF1\_LsgRNA339  
CCAGGCTCATGGATTTCTGGCTCGGGGAC  
>NF1\_LsgRNA340  
CTCTGCTGGAGGCACACTCCCCAAGGGCA  
>NF1\_LsgRNA341  
CTAAGCTGGCTCTGCAGTGCAGGAGGGTAA  
>NF1\_LsgRNA342  
TTCTGCTGTACTGCCTTGGGTTTCGGGCCC  
>NF1\_LsgRNA343  
AATGGCTTACTTGGATTAAAAAGCAGGTTC  
>NF1\_LsgRNA344  
GTTAGCTTTGAAGTGGATCCTACCAGGTTT  
>NF1\_LsgRNA345  
GGCAGGAAACGTGGCATGTCTCGGAGGCTG  
>NF1\_LsgRNA346  
CTCTGGAACAATCAGGAGAAAATGGGCAG  
>NF1\_LsgRNA347  
CTTGGGAAGATACACATGCAAAATGGGAAC  
>NF1\_LsgRNA348  
TATAGGAAGGGTCACCATGATGAATGGGAT  
>NF1\_LsgRNA349  
GCTGGGAAGTTGCAAGTGAGGTCATGGAAT  
>NF1\_LsgRNA350  
TCATGGAATTAGAAAGGTTAAGGTTGGCAG  
>NF1\_LsgRNA351  
ACTTGGACAGCAGTAGAACCAACCTGGAAA  
>NF1\_LsgRNA352  
GGGAGGACATGGCCGCGCACAGGCCGGTGG  
>NF1\_LsgRNA353  
GCCTGGACATGGGGCAACCTTCTCAGGCCA  
>NF1\_LsgRNA354  
TCGGGGACTGGTCTGGCCGACAGTTGGATA  
>NF1\_LsgRNA355  
ATACGGAGACTATCTAAAGTATGCAGGTTT  
>NF1\_LsgRNA356  
CTTGGGAGTCAAAAACTTGCTGATGGTAT  
>NF1\_LsgRNA357  
CTCTGGAGTGGCACTGCAAGCAAATGGATC  
>NF1\_LsgRNA358  
CACCGGATATCTGCTTCCTCACAGAGGTGG  
>NF1\_LsgRNA359  
CTATGGATCCTCCTCCACTCACATGGGACA  
>NF1\_LsgRNA360  
TTATGGATCGGCTGTTGTCTTAATGGTGT

>NF1\_LsgRNA361  
CTCAGGATGAACTAGCTCGAGTTCTGGTTA  
>NF1\_LsgRNA362  
GGTAGGATGTGATATTCCTTCTAGTGGAAA  
>NF1\_LsgRNA363  
TCATGGATTTCTGGCTCGGGGACTGGTCT  
>NF1\_LsgRNA364  
AGATGGCAACACTTCTTGACATACCTGGGTC  
>NF1\_LsgRNA365  
GCCTGGCAACCTATAGCCCACCCATGGGTC  
>NF1\_LsgRNA366  
CAGTGGCACACACTTCGAAGTTGAGGGGGG  
>NF1\_LsgRNA367  
TGATGGCAGATACTGCTGTAGCTTTGGCTT  
>NF1\_LsgRNA368  
ATTGGGCAGTATCTTTCCAGCAACAGGTAA  
>NF1\_LsgRNA369  
GGCTGGCATCACTGAGGCACTGTACGGTCC  
>NF1\_LsgRNA370  
ACAGGGCCACTTCTAGTTTGGTCTGGGCTT  
>NF1\_LsgRNA371  
GCCAGGCCAGAATTGCTTCTCTGCTGGAGG  
>NF1\_LsgRNA372  
CGAGGGCCAGTTACTAGAGACATCAGGTTT  
>NF1\_LsgRNA373  
TTTTGGCCGAATCTTGGTGTGTTGGGGGAT  
>NF1\_LsgRNA374  
TCCAGGCTCATGGATTTCTGGCTCGGGGA  
>NF1\_LsgRNA375  
CAAAGGCTCCTAAAAGGCAAGAAATGGAAT  
>NF1\_LsgRNA376  
TGCAGGCTGACTGCCTCTTGAGAATGGCTT  
>NF1\_LsgRNA377  
TATTGGCTGATCGGTTTGGAGAGATTGGTGG  
>NF1\_LsgRNA378  
CTGTGGCTGTGCTGCAGCTTGATGAGGTCA  
>NF1\_LsgRNA379  
GACTGGCTTCCTTTGTGCCCTTGGGGGAGT  
>NF1\_LsgRNA380  
CTTTGGCTTCTGGAAATGTGAAATTGTTT  
>NF1\_LsgRNA381  
TCTGGGCTTGTTCGGCAAATCGGGGGGTTTC  
>NF1\_LsgRNA382  
CCTTGGCTTTAGAAGAGGACCTGAAGGTAT



>NF1\_LsgRNA383  
GGAAGGAAAAGGGAACCTCTCTATGGTCA  
>NF1\_LsgRNA384  
GCTTGGGAAGATACACATGCAAAAATGGGAA  
>NF1\_LsgRNA385  
CGCGGGGAGGACATGGCCGCGCACAGGCCG  
>NF1\_LsgRNA386  
GTCTGGGCTTGTCTGGCAAATCGGGGGGGTT  
>NF1\_LsgRNA387  
CCATGGGTCCAGTCAGTGAACGTAAGGGTT  
>NF1\_LsgRNA388  
GGAGGGTAAGGAGATGTGGGAGTCAGGAGG  
>NF1\_LsgRNA389  
CCGTGGTCAGCCGCTTCGACGAGCAGGTAA  
>NF1\_LsgRNA390  
CATGGGTCCAGTCAGTGAACGTAAGGGTTC  
>NF1\_LsgRNA391  
GACTGGTCTGGCCGACAGTTGGATAGGTGG  
>NF1\_LsgRNA392  
GGCCGGTGAATGGGTCCAGGCCGTGGTCA  
>NF1\_LsgRNA393  
TAATGGTGTGTAACCATGAGAAAGTGGGAC  
>NF1\_LsgRNA394  
TCTTGGTGTGTTGGGGGATAGAGTCGGGCT  
>NF1\_LsgRNA395  
TTAAGGTTGGCAGTGATACTAAGCTGGCTC  
>NF1\_LsgRNA396  
CCCCGTAAAAAAGGAGAAAGTGACAGGAAC  
>NF1\_LsgRNA397  
TACAGTAATTACCTTATTAAGAAGTGGCTG  
>NF1\_LsgRNA398  
ACATGTACAGGGCCACTTCTAGTTTGGTCT  
>NF1\_LsgRNA399  
CTACGTACTCCTGGAGCCTCTCTCCGGAAG  
>NF1\_LsgRNA400  
CTTAGTAGCACAGAAATTCTCAAGTGGTTG  
>NF1\_LsgRNA401  
AATTGTAGTGGACCTTACCCATACCGGGCC  
>NF1\_LsgRNA402  
ACTGGTCACAATGATGGGTGATCAAGGAGA  
>NF1\_LsgRNA403  
CTCTGTCAGCAATATGATGTCAACAGGTAA  
>NF1\_LsgRNA404  
CCATGTCCAGGCTCATGGATTTCTGGCTC

>NF1\_LsgRNA405  
TTCAGTCCATGGTGGTTGATCTTAAGGTAA  
>NF1\_LsgRNA406  
ACCAGTCCATGTGTGGAAGCTCTAAGGGAG  
>NF1\_LsgRNA407  
ACCTGTCCCGGTAAGTGAACGGAAGGCAA  
>NF1\_LsgRNA408  
TCAGGTCCTCTTCTAAAGCCAAGGTGGCAG  
>NF1\_LsgRNA409  
AAAAGTCTCTCTCATAGGAGCCAGGAGA  
>NF1\_LsgRNA410  
CAGTGTCTGAATCAAATGTTCTCTTGGATG  
>NF1\_LsgRNA411  
ATTTGTCTGACACAGACTCCCTACAGGAAT  
>NF1\_LsgRNA412  
TTTGGTCTGGGCTTGTCGGCAAATCGGGGG  
>NF1\_LsgRNA413  
GGGAGTCTGTGTCAGACAAATCTATGGATC  
>NF1\_LsgRNA414  
GCAAGTGAGGTCATGGAATTAGAAAGGTTA  
>NF1\_LsgRNA415  
GGATGTGATCACAATTCGTAATAAAGGATC  
>NF1\_LsgRNA416  
CCAAGTGCAGAAGCAAAGAAGCGCTGGCAG  
>NF1\_LsgRNA417  
ATGTGTGGAAGCTCTAAGGGAGAGCGGACC  
>NF1\_LsgRNA418  
CACTGTTACAGTGGCCAGTGGTAGGGGAGA  
>NF1\_LsgRNA419  
CGTTGTTACTTTCTTAGTAGCCACAGGTCC  
>NF1\_LsgRNA420  
CGCAGTTAGCAGTTATAAATAGCCTGGAAA  
>NF1\_LsgRNA421  
GAACGTTGAACTCTCCCCTACCACTGGCCA  
>NF1\_LsgRNA422  
CTCGGTTGAACTTCGAAATATGTTTGGTGA  
>NF1\_LsgRNA423  
CTCAGTTGATTATATTGGATACACTGGAAA  
>NF1\_LsgRNA424  
CTTGGTTGCAGGGATGGATTATATTGGAAT  
>NF1\_LsgRNA425  
ATCGGTTTGAGAGATTGGTGGAAGTGGTCA  
>NF1\_LsgRNA426  
ACAGGTTTGTGCTCTGGAGGACCCAGGTAT

>NF1\_LsgRNA427  
ATTTTAAAAAACCTACCGTAAACTCGGGTC  
>NF1\_LsgRNA428  
ACAATAAAGAGGGTGTGTGGCAGGGATA  
>NF1\_LsgRNA429  
ACCTTAAAGTGTGGTTGTTGTGAGGGCTT  
>NF1\_LsgRNA430  
TTTTTTAAATTAAAGGTACAAGTTAAGGCAC  
>NF1\_LsgRNA431  
CATTTAAATTTAAAGCCCTAAAGAAGGTTG  
>NF1\_LsgRNA432  
GGAATAAATTTCTTCTTAAAAATAAGGTAA  
>NF1\_LsgRNA433  
ATTCTAACGTGAGGTGTGGCTCATTTGGCTG  
>NF1\_LsgRNA434  
TCCTTAACTATCCAAAAGCCAAAATGGAAG  
>NF1\_LsgRNA435  
CTGCTAACTGCGCAACCTTCTTTAGGGCTT  
>NF1\_LsgRNA436  
CAGGTAAGATGTTTGGTATTGTGGTGGGGA  
>NF1\_LsgRNA437  
AAGTTAAGGCACACAGAAGATTATAGGCAG  
>NF1\_LsgRNA438  
GCTATAAGTATCTTCTTGTCCATGGTGA  
>NF1\_LsgRNA439  
TAATTAATTCTGCTGTACTGCCTTGGGTTT  
>NF1\_LsgRNA440  
TACTTACACAACAGGAAAGACTTTGGGAAA  
>NF1\_LsgRNA441  
CAGATACACCTGTCAGCAAATTTATGGATC  
>NF1\_LsgRNA442  
ATTATACATTTAAACTTACCCTTCAGGAGT  
>NF1\_LsgRNA443  
TCCTTACCAGCCATATCAGTCTGTGGGATC  
>NF1\_LsgRNA444  
GGCATACTCAGTGTTTCTGCAGTGGGAT  
>NF1\_LsgRNA445  
AGAATACCTGACAGACTGGGTTATGGGAAC  
>NF1\_LsgRNA446  
GACTTACCTGGCCATCTTCCATTTTGGCTT  
>NF1\_LsgRNA447  
CTTGTACCTTTAATTTAAAAATCGAGGGCC  
>NF1\_LsgRNA448  
ATTTTACTGGCCAAGCTGTTGCCTCGGAAG

>NF1\_LsgRNA449  
CTTTTACTGTAGCTTTATTTCAGTAGGGAGT  
>NF1\_LsgRNA450  
TATTTACTTTGCAGGTAAGATGTTTGGTAT  
>NF1\_LsgRNA451  
AATGTAGAAGGTGAATTCTGAGCCAGGCAG  
>NF1\_LsgRNA452  
ACTGTAGCTTTATTTCAGTAGGGAGTGGCAA  
>NF1\_LsgRNA453  
CAATTAGTTGAAGTAATGATGGCAAGGAGA  
>NF1\_LsgRNA454  
TCTATATAGGTATGTTTCGTGTGCTTGGGAA  
>NF1\_LsgRNA455  
CAAGTATCATGAGCGGCTGCTGACTGGCCT  
>NF1\_LsgRNA456  
CGGATATCTGCTTCCTCACAGAGGTGGCGG  
>NF1\_LsgRNA457  
TATTTATGGCAATCCGGAATCCTCTGGAGT  
>NF1\_LsgRNA458  
GAGATATCCAACGTGCAAGTGGCTGGACC  
>NF1\_LsgRNA459  
GACTTCAAATACGGACCAATGTTAAGGATC  
>NF1\_LsgRNA460  
CTCTTCACAAAAGAAGAACATATGCGGCCT  
>NF1\_LsgRNA461  
GCCCTCACAACAACCAACTTTAAGGTGA  
>NF1\_LsgRNA462  
GGGATCACAACACCCCCAAAATGAGGAGA  
>NF1\_LsgRNA463  
ACGTTCACTGACTGGACCCATGGGTGGGCT  
>NF1\_LsgRNA464  
CTAATCACTTACCCACTGAGAACAAGGAAC  
>NF1\_LsgRNA465  
TTGATCACTTGATATCAGACACAAAGGCTC  
>NF1\_LsgRNA466  
TCTGTCAGCTGCCTACTTCCTCCATGGCCA  
>NF1\_LsgRNA467  
AATTTTCATATGGCTTTGCATAATATGGCTT  
>NF1\_LsgRNA468  
AATTTTCATCTCTTGGCAAAAATGAGAGGTCA  
>NF1\_LsgRNA469  
TCAGTCATCTGAAGGAGGTTCCGCTGGTTT  
>NF1\_LsgRNA470  
GAGGTCATGGAATTAGAAAGGTTAAGGTTG

>NF1\_LsgRNA471  
CCAGTCATGTTGATCCATTCTGTAGGGAG  
>NF1\_LsgRNA472  
CAATTCCACACCATCTCTTCTTCAGGCTG  
>NF1\_LsgRNA473  
TTCGTCCACTGTTACAGTGGCCAGTGGTAG  
>NF1\_LsgRNA474  
ATTGTCCAGTCTATCATTTCATATCCGGACC  
>NF1\_LsgRNA475  
AAACTCCATGAATGTGTTATAGTTGGGCAA  
>NF1\_LsgRNA476  
CCAGTCCATGTGTGGAAGCTCTAAGGGAGA  
>NF1\_LsgRNA477  
TTGATCCCAAGCCACCTGTTGCACTGGTTT  
>NF1\_LsgRNA478  
AGCATCCCACTGCAGGAAACACTGAGGTAT  
>NF1\_LsgRNA479  
TCTATCCCCCAACACACCAAGATTCGGCCA  
>NF1\_LsgRNA480  
GCTCTCCCTTAGAGCTTCCACACATGGACT  
>NF1\_LsgRNA481  
GCCTTCCGTTCCAGTTACCGGGACAGGTCA  
>NF1\_LsgRNA482  
TGGGTCTCCAGAGCACAAACCTGTGGCAG  
>NF1\_LsgRNA483  
ATGGTCTCTCCCAAAGGTTCTGAAGGATA  
>NF1\_LsgRNA484  
GTA CTCTGGAGCCTCTCTCCGGAAGGGAA  
>NF1\_LsgRNA485  
GATTTCTGGCTCGGGGACTGGTCTGGCCG  
>NF1\_LsgRNA486  
ACACTCCTGGTGCATGAAGGTGAGCGGCGT  
>NF1\_LsgRNA487  
GGTATCCTTCAGAACCTTTGGGAGAGGACC  
>NF1\_LsgRNA488  
TACATCGTCTACTCTGGAACAATCAGGAGA  
>NF1\_LsgRNA489  
TTTATCTAAAATCCCTGCTTCATACGGTGA  
>NF1\_LsgRNA490  
AAGCTCTAAGGGAGAGCGGACCTGTGGCTA  
>NF1\_LsgRNA491  
TTCATCTAATCTCATTGTGTCCTTTGGTTG  
>NF1\_LsgRNA492  
TGTATCTAGGGATCATAAAGCTGTTGGAAG

>NF1\_LsgRNA493  
TTTCTCTAGTCCGCATTGGATTGGTGGCCT  
>NF1\_LsgRNA494  
GCAATCTCTGGCATGTGTGACTGAGGGACC  
>NF1\_LsgRNA495  
TGTATCTGCCACAGGTTTGTGCTCTGGAGG  
>NF1\_LsgRNA496  
TTGGTCTGGGCTTGTCTGGCAAATCGGGGGG  
>NF1\_LsgRNA497  
CACCTCTGTGAGGAAGCAGATATCCGGTGT  
>NF1\_LsgRNA498  
CGCCTCTTAACAATGGTCTTGTGAAGGCTT  
>NF1\_LsgRNA499  
CACTTCTTCTTACTGATATTTCAATGGAAA  
>NF1\_LsgRNA500  
GCAGTCTTTAGTCGCATTTCTACCAGGTTA  
>NF1\_LsgRNA501  
GAATTCTTTATGAATACTTAGCAGAGGCCA  
>NF1\_LsgRNA502  
GCATTGAAACAATGATGTTAAATCTGGTCA  
>NF1\_LsgRNA503  
ACTTTGAACTGGTAAGGTTAAGGCTGGACC  
>NF1\_LsgRNA504  
GGTGTGAAGAAAATGGCAGATTTCTGGCAG  
>NF1\_LsgRNA505  
AATTTGAAGTGAATACACAGAGCGTGGCCT  
>NF1\_LsgRNA506  
ATGATGAATGGGATATGTATCCATAGGAAC  
>NF1\_LsgRNA507  
GTATTGAATTGAAACACCTTTGTTTGAAT  
>NF1\_LsgRNA508  
CATTTGACTGGTATTTCCACTAGAAGGAAT  
>NF1\_LsgRNA509  
GCATTGAGTAAGTTTGACATTGCAAGGACC  
>NF1\_LsgRNA510  
TGGTTGATGAAAACAACATGAATAAGGTAA  
>NF1\_LsgRNA511  
AGATTGATGCTGTGTATTGTCACTCGGTTG  
>NF1\_LsgRNA512  
ACTATGATTTACTGCATCACTTGTAGGACA  
>NF1\_LsgRNA513  
TCCTTGCAGAATCCAAGAAAACAGGGGCC  
>NF1\_LsgRNA514  
GCAGTGCAGGAGGTAAGGAGATGTGGGAG

>NF1\_LsgRNA515  
GATCTGCATGAATTAGTTTCACCATGGACA  
>NF1\_LsgRNA516  
CTGCTGCCACCTTGGCTTTAGAAGAGGACC  
>NF1\_LsgRNA517  
TCATTGCCTTCCGTTCCAGTTACCGGGACA  
>NF1\_LsgRNA518  
TGGTTGCGGGAAATATTGATCTGCAGGAAT  
>NF1\_LsgRNA519  
ATTCTGCTGTACTGCCTTGGGTTTCGGGCC  
>NF1\_LsgRNA520  
CCGATGCTGTTCTGAGGGAAACGCTGGCTA  
>NF1\_LsgRNA521  
TCCCTGCTTCATACGGTGAGACAATGGCAG  
>NF1\_LsgRNA522  
CATTTGCTTGCAGTGCCACTCCAGAGGATT  
>NF1\_LsgRNA523  
TACTTGCTTTACACAGTTTGACACAGGCAA  
>NF1\_LsgRNA524  
ACTCTGGAACAATCAGGAGAAAATTGGGCA  
>NF1\_LsgRNA525  
TGACTGGACCCATGGGTGGGCTATAGGTTG  
>NF1\_LsgRNA526  
TCTATGGATCCTCCTCCACTCACATGGGAC  
>NF1\_LsgRNA527  
TCCATGGATTGGATTTAACAAATTTGGATC  
>NF1\_LsgRNA528  
ACAGTGGCACACACTTCGAAGTTGAGGGGG  
>NF1\_LsgRNA529  
ACATTGGCCAGAGCCATCGCTATAGGGAGT  
>NF1\_LsgRNA530  
CTTTTGGCCGAATCTTGGTGTGTTGGGGGA  
>NF1\_LsgRNA531  
TGACTGGCTTCCTTTGTGCCCTTGGGGGAG  
>NF1\_LsgRNA532  
TGACTGGGAAATCTTACCTGTTGCTGGAAA  
>NF1\_LsgRNA533  
GGTCTGGGCTTGTTCGGCAAATCGGGGGGGT  
>NF1\_LsgRNA534  
CCCATGGGTGGGCTATAGGTTGCCAGGCCA  
>NF1\_LsgRNA535  
CCACTGGTCCAGCCACTTGCACGTTGGAAT  
>NF1\_LsgRNA536  
GTTCTGGTTACTCTGTTTGATTCTCGGCAT

>NF1\_LsgRNA537  
TTATTGTCTCTATTAGTAAGACACTGGCAG  
>NF1\_LsgRNA538  
GAAATGTGAAATTGGTTTCAAGCAAGGTAA  
>NF1\_LsgRNA539  
CCACTGTTACAGTGGCCAGTGGTAGGGGAG  
>NF1\_LsgRNA540  
GGTATGTTTCGTGTGCTTGGGAATATGGTCC  
>NF1\_LsgRNA541  
AAGATGTTGTTCTAAAGTAGGAGTTGGAGA  
>NF1\_LsgRNA542  
CATCTGTTTGTCCACATTAGGCTTAGGTTA  
>NF1\_LsgRNA543  
TTTTTTAAAAAATTCAGGCTCTGCTGGTTC  
>NF1\_LsgRNA544  
CACCTTAAAGTGTGGTTGTTGTGAGGGCT  
>NF1\_LsgRNA545  
GGCTTTAAATTTAAATGCTGTTTCTGGAAA  
>NF1\_LsgRNA546  
GTAATTAATTCTGCTGTACTGCCTTGGGTT  
>NF1\_LsgRNA547  
ATACTTACACAACAGGAAAGACTTTGGGAA  
>NF1\_LsgRNA548  
CATTTTACATCATCATCTGCTGCTTGGTTT  
>NF1\_LsgRNA549  
TTGCTTACCTTGTCATTGAATATACGGAGA  
>NF1\_LsgRNA550  
ACATTTACTGACCTGGGGAATGCTGGGAAG  
>NF1\_LsgRNA551  
TCTTTTACTGTAGCTTTATTTCAGTAGGGAG  
>NF1\_LsgRNA552  
GGGCTTATACGAAAGCAAGAAACAAGGCAG  
>NF1\_LsgRNA553  
ATGATTATCTTTAATAGAGTCCAGAGGAAG  
>NF1\_LsgRNA554  
TAGGTTCAAACCTGGTCAAATCAATGGTGA  
>NF1\_LsgRNA555  
TAACTTCAAGCCCCTTTCGATTCTAGGTGG  
>NF1\_LsgRNA556  
ATATTTCAATGGAAAATGTTCCCTATGGATA  
>NF1\_LsgRNA557  
ATTCTTCAATTTGTTAAATAGCATTGGATA  
>NF1\_LsgRNA558  
AGCCTTCACAAGACCATTGTTAAGAGGCGA



>NF1\_LsgRNA559  
CAGTTTCATCAAAACCAGTGCAACAGGTGG  
>NF1\_LsgRNA560  
TGTTTTTCATCTTTCAGGACACTAAAGGAGA  
>NF1\_LsgRNA561  
GATGTTCCCATAACCCAGTCTGTCAGGTAT  
>NF1\_LsgRNA562  
AAGATTTCGGCCAAAAGATGTCCCTGGGACA  
>NF1\_LsgRNA563  
GTTTTTCTCTAGTCCGCATTGGATTGGTGG  
>NF1\_LsgRNA564  
GGAATTCTGAGGAGGAACTGATGATGGCAT  
>NF1\_LsgRNA565  
CAGTTTCTGCTACTCTCCTCATTTTGGGGG  
>NF1\_LsgRNA566  
CAACTTCTTAGTGTTGGCCTGAGAAGGTTG  
>NF1\_LsgRNA567  
GTGGTTCTTTATTTATAGGCATTTTGGAAC  
>NF1\_LsgRNA568  
TGCCTTGATTGACACGTACCTGCCTGGAAT  
>NF1\_LsgRNA569  
TTCCTTGCAGAATCCAAGAAAACAGGGGCC  
>NF1\_LsgRNA570  
AAGGTTGCCCCATGTCCAGGCTCATGGATT  
>NF1\_LsgRNA571  
GAACTTGCTAGATAATCATACTGAAGGCAG  
>NF1\_LsgRNA572  
GCTCTTGCTGGCCATGGAGGAAGTAGGCAG  
>NF1\_LsgRNA573  
TTCTTTGCTTCTGCACTTGGCTTGCGGATC  
>NF1\_LsgRNA574  
GTGCTTGCTTTACATCGTCTACTCTGGAAC  
>NF1\_LsgRNA575  
CACATTGGCCAGAGCCATCGCTATAGGGAG  
>NF1\_LsgRNA576  
GCCATTGTCTCACCGTATGAAGCAGGGATT  
>NF1\_LsgRNA577  
CGAATTGTGATCACATCCTCTGATTGGCAA  
>NF1\_LsgRNA578  
CTATTTTAAAGAATGTTAACAATATGGTGA  
>NF1\_LsgRNA579  
GAATTTTACATACTACTAACTCTGGTTA  
>NF1\_LsgRNA580  
CACATTTACTGACCTGGGGAATGCTGGGAA

>NF1\_LsgRNA581  
 CTACTTTAGAACAAACATCTTATGTGGGATG  
 >NF1\_LsgRNA582  
 TTTTTTTCAGCTTCCAATAAAAAACAGGACA  
 >NF1\_LsgRNA583  
 TCATTTTCCTACTTGTTTCAGTCCATGGTGG  
 >NF1\_LsgRNA584  
 CCATTTTCTTCACACCTGTTCGTGAAGGAAA  
 >NF1\_LsgRNA585  
 CTGGTTTCTTCATCAATTCCAGGCAGGTAC  
 >NF1\_LsgRNA586  
 CGTATTTGAAGTCCCACTTTCTCATGGTTA  
 >NF1\_LsgRNA587  
 TACCTTTGAGCTAGTTCTGTCCACTGGTCC  
 >NF1\_LsgRNA588  
 TCATTTTGCCAAGAGATGAAATTTAGGTGA

(28)  $S_{11}^-$ : 178 low on-target activity sgRNAs targeting NF2

>NF2\_LsgRNA1  
 TCCGAAACATCTCGTACAGTGACAAGGAGG  
 >NF2\_LsgRNA2  
 CTTCAAAGAAGGCCACTCGGGACTTGGCGC  
 >NF2\_LsgRNA3  
 CCTCAAAGCTTCGTGTTAATAAGCTGGTAA  
 >NF2\_LsgRNA4  
 CTGAAAAGGCCAGATCACCGAGGAGGAGG  
 >NF2\_LsgRNA5  
 CCAAAAAATCCCCGCTTGTGAACACTGGGGT  
 >NF2\_LsgRNA6  
 TAATAAATCTGTATCAGATGACTCCGGAAA  
 >NF2\_LsgRNA7  
 GATAAAATTTGGCCAAGAAGTGAAAGGTGA  
 >NF2\_LsgRNA8  
 TCGAAAGACAGGCTGTCACCAATGAGGTTG  
 >NF2\_LsgRNA9  
 AGCGAAGAGCCAAGCAGAAGCTCCTGGAGA  
 >NF2\_LsgRNA10  
 GCCCAAGAGGAATTGCTTCCAAAAAGGGTA  
 >NF2\_LsgRNA11  
 CAAAAATCCCCGCTTGTGAACACTGGGGTC  
 >NF2\_LsgRNA12  
 TGGCAATCTCCAGGAGCTTCTGCTTGGCTC  
 >NF2\_LsgRNA13  
 GCACAATGAGAACTCCGACAGGGGTGGCAG

>NF2\_LsgRNA14  
TCACACAACATTTATTCTTCTTACAGGTAC  
>NF2\_LsgRNA15  
AAGAACCAGTCACCTTTCACTTCTTGGCCA  
>NF2\_LsgRNA16  
AAGGACCTCTTTGATTTGGTGTGCCGGACT  
>NF2\_LsgRNA17  
CCTCAGAAATCACCAGTGCTTCGTTGGCCA  
>NF2\_LsgRNA18  
CCCAAGAGGAATTGCTTCCAAAAAGGGTAA  
>NF2\_LsgRNA19  
CCAAAGAGGCAGATCAGCTGAAGCAGGACC  
>NF2\_LsgRNA20  
CTGAAGATGGCTGAGGAGTCAGAGAGGAGG  
>NF2\_LsgRNA21  
CTTCAGCATTCTCAGGATAAAAATTTGGCCA  
>NF2\_LsgRNA22  
TGAAAAGCCCAGGCCAGGGAGGAGAAGGCTA  
>NF2\_LsgRNA23  
AACCAGCTCCTCTTCAGCATTCTCAGGATA  
>NF2\_LsgRNA24  
AGACAGCTGACCTGTTGGCTGAAAAGGCCCC  
>NF2\_LsgRNA25  
AGCCAGGAGCACAGAAGCCTCAGGAGGGCA  
>NF2\_LsgRNA26  
ATCGAGGCCTTGAAACTGAAAGAGAGGGAG  
>NF2\_LsgRNA27  
GGAAAAGGAAGGACCTCTTTGATTTGGTGT  
>NF2\_LsgRNA28  
AATGAGGTTGAAGCTTGGTATGTCAGGAGG  
>NF2\_LsgRNA29  
AAGTAGTTCACACCGTACATCTCCAGGTCC  
>NF2\_LsgRNA30  
TGGAAGTTCAGCAGATGAAAGCCCAGGCCA  
>NF2\_LsgRNA31  
TGACATACCAAGCTTCAACCTCATTGGTGA  
>NF2\_LsgRNA32  
CTGTATCAGATGACTCCGGAAATGTGGGAG  
>NF2\_LsgRNA33  
AACCATGATCTATTTATGAGGAGAAGGAAA  
>NF2\_LsgRNA34  
TGGTATGTCAGGAGGCAACGGTGCTGGAAT  
>NF2\_LsgRNA35  
TTTCATTCCACGGGAAGGAGATCTTGGGGG

>NF2\_LsgRNA36  
AGTAATTCTCTCCTCCCACATTTCCGGAGT  
>NF2\_LsgRNA37  
TCTTATTGGATCCACAGAATAAAAAGGGCA  
>NF2\_LsgRNA38  
GCAGCAAGCACAATACCATTAAAAAGGTAC  
>NF2\_LsgRNA39  
GCATCAAGGCCACAGCGATTTCGCACGGAGG  
>NF2\_LsgRNA40  
TACACAATCAAGGACACAGTGGCCTGGCTC  
>NF2\_LsgRNA41  
TCTGCACAATGAGAACTCCGACAGGGGTGG  
>NF2\_LsgRNA42  
AGGGCACAGAGCTGCTGCTTGGAGTGGATG  
>NF2\_LsgRNA43  
AGGACACAGTGGCCTGGCTCAAAATGGACA  
>NF2\_LsgRNA44  
TACGCAGAGCACCGAGGCCGAGCCAGGTGA  
>NF2\_LsgRNA45  
GCCACAGATTCTCCAGCTATGTATCGGGAA  
>NF2\_LsgRNA46  
CAGCCATCTTCAGTGCCAGCACCTCGGCTT  
>NF2\_LsgRNA47  
AGCTCATGCGGGAAGCGATGGCCCCGGCCA  
>NF2\_LsgRNA48  
AGATCATGGTTCCCGATACATAGCTGGAGA  
>NF2\_LsgRNA49  
GCTGCATTTCTGCTCAGCCTCTGCGGCCT  
>NF2\_LsgRNA50  
CTCCCCACAGGGATGAAGCTGAAATGGAAT  
>NF2\_LsgRNA51  
GCTTCCAGCACCTTCTGCTCCATCAGGCGC  
>NF2\_LsgRNA52  
TTATCCAGTGGTTTAATAGTAAACTGGAAG  
>NF2\_LsgRNA53  
TCTTCCAGTTTACTATTAAACCACTGGATA  
>NF2\_LsgRNA54  
GGCCCCCAGGCTCACCGGGTACGTGGGCTT  
>NF2\_LsgRNA55  
TGGCCCCCAGGCTCACCGGGTACGTGGGCT  
>NF2\_LsgRNA56  
CTGACCCCCAAGATCTCCTTCCCGTGAAT  
>NF2\_LsgRNA57  
CGCTCCGCCTCGCGTGCTTCTGCAGGTCC

>NF2\_LsgRNA58  
CGGGCCTGAGCCCCGCGCCATGGCCGGGGC  
>NF2\_LsgRNA59  
AGCGCCTGATGGAGCAGAAGGTGCTGGAAG  
>NF2\_LsgRNA60  
TTGGCCTGGACGGCGTAAGAAGCCAGGAGC  
>NF2\_LsgRNA61  
TGCTCCTGGCTTCTTACGCCGTCCAGGCCA  
>NF2\_LsgRNA62  
ACTACGACCCCAGTGTTTACAAGCGGGGAT  
>NF2\_LsgRNA63  
TCACCGAGGAGGAGGCAAACTTCTGGCCC  
>NF2\_LsgRNA64  
CGCACGAGGGATGAGTTGGAGAGGAGGCTG  
>NF2\_LsgRNA65  
AAGCCGAGGTGCTGGCACTGAAGATGGCTG  
>NF2\_LsgRNA66  
GCCTCGCTCGAGAGAAGCAGATGAGGGAGG  
>NF2\_LsgRNA67  
GCAACGGTGCTGGAATTGGGTTCATGGGCT  
>NF2\_LsgRNA68  
GGATCGTCACCATGGACGCCGAGATGGAGT  
>NF2\_LsgRNA69  
CTGGCTCAAATGGACAAGAAGTTGGGCT  
>NF2\_LsgRNA70  
CCTGCTCAGCCTCTGCGGCCTTCTGGGCCA  
>NF2\_LsgRNA71  
CTGTCTCCCTCTCTTTTCAAGGCCT  
>NF2\_LsgRNA72  
GGGGCTCCGAGAAACCTGGTTCTTTGGACT  
>NF2\_LsgRNA73  
TCTCCTCCTCCGTGCGAATCGCTGTGGCCT  
>NF2\_LsgRNA74  
TTACCTCGCAATTGAACTCCATCTCGGCGT  
>NF2\_LsgRNA75  
TTTGCTCTGCAATTCTGCAGGTACTGGATC  
>NF2\_LsgRNA76  
CGGACTCTGGGGCTCCGAGAAACCTGGTTC  
>NF2\_LsgRNA77  
AGAGCTCTTCAAAGAAGGCCACTCGGGACT  
>NF2\_LsgRNA78  
GGGCCTGAGCCCCGCGCCATGGCCGGGGCC  
>NF2\_LsgRNA79  
TCACCTGCTAGAGCTCTTCAAAGAAGGCCA

>NF2\_LsgRNA80  
TCATCTGCTGAACTTCCAAAGAATCGGCTT  
>NF2\_LsgRNA81  
GCTGCTGCTTGGAGTGGATGCCCTGGGGCT  
>NF2\_LsgRNA82  
TCAGCTGTCTCCTCAGACCGCATCTGGAGG  
>NF2\_LsgRNA83  
CCAGCTTATTAACACGAAGCTTTGAGGAGT  
>NF2\_LsgRNA84  
CCTGCTTCAGCTGATCTGCCTCTTTGGCCC  
>NF2\_LsgRNA85  
TGGCCTTCTTTGAAGAGCTCTAGCAGGTGA  
>NF2\_LsgRNA86  
TGTGCTTGCTGCTGCCACCCCTGTCGGAGT  
>NF2\_LsgRNA87  
GAAGCTTGGTATGTCAGGAGGCAACGGTGC  
>NF2\_LsgRNA88  
CATCCTTTCCTTGCAGGGCCAAAGAGGCAG  
>NF2\_LsgRNA89  
CCTGCTTCTAGCCTTCTCCTCCCTGGCCT  
>NF2\_LsgRNA90  
AACTGAAAGAGAGGGAGACAGCTCTGGATA  
>NF2\_LsgRNA91  
AATTGAACTCCATCTCGGCGTCCATGGTGA  
>NF2\_LsgRNA92  
AGCTGAAGCTCATGCGGGAAGCGATGGCCC  
>NF2\_LsgRNA93  
CCCAGAAGGCCGCAGAGGCTGAGCAGGAAA  
>NF2\_LsgRNA94  
CTACGACCCCAGTGTTTCAACAAGCGGGGATT  
>NF2\_LsgRNA95  
TGAGGAGAAGGAAAGCCGATTCTTTGGAAG  
>NF2\_LsgRNA96  
TCTTGAGAGAGCTGAAGCTCATGCGGGAAG  
>NF2\_LsgRNA97  
TCAGGAGGCAACGGTGCTGGAATTGGGTTC  
>NF2\_LsgRNA98  
TGCAGATGAAAGAAGAAGCAACAATGGCCA  
>NF2\_LsgRNA99  
AGCAGATGAAAGCCCAGGCCAGGGAGGAGA  
>NF2\_LsgRNA100  
ATCAGATGACTCCGGAATGTGGGAGGAGA  
>NF2\_LsgRNA101  
TTCTGCACAATGAGA ACTCCGACAGGGGTG

>NF2\_LsgRNA102  
GAACGCACGAGGGATGAGTTGGAGAGGAGG  
>NF2\_LsgRNA103  
TGGAGCAGAAGGTGCTGGAAGCCGAGGTGC  
>NF2\_LsgRNA104  
CCTTG CAGAGCGCCAAGTCCCGAGTGGCCT  
>NF2\_LsgRNA105  
TTCAGCAGATGAAAGCCCAGGCCAGGGAGG  
>NF2\_LsgRNA106  
TATTGCAGATGAAGTGGAAAGGGAAGGACC  
>NF2\_LsgRNA107  
CTGAGCAGGAAATGCAGCGCATCAAGGCCA  
>NF2\_LsgRNA108  
TTTGGCCAAGAAGTGAAGGTGACTGGTTC  
>NF2\_LsgRNA109  
CCAGGCTCACCGGTACGTGGGCTTGGTGG  
>NF2\_LsgRNA110  
TCCTGCTCAGCCTCTGCGCCTTCTGGGCC  
>NF2\_LsgRNA111  
GATAGCTCAGGACCTGGAGATGTACGGTGT  
>NF2\_LsgRNA112  
TAGAGCTCTTCAAAGAAGGCCACTCGGGAC  
>NF2\_LsgRNA113  
AGCTGCTGCTTGGAGTGGATGCCCTGGGGC  
>NF2\_LsgRNA114  
AGGTGCTGGCACTGAAGATGGCTGAGGAGT  
>NF2\_LsgRNA115  
TACTGCTTGGTACGCAGAGCACCGAGGCCG  
>NF2\_LsgRNA116  
ACATGGAAAAGAGCAAGCATCTGCAGGAGC  
>NF2\_LsgRNA117  
TGCGGGAAGCGATGGCCCCGGCCATGGCGC  
>NF2\_LsgRNA118  
AGCAGGACCTGCAGGAAGCACGCGAGGCGG  
>NF2\_LsgRNA119  
CCAGGGAGGAGAAGGCTAGAAAGCAGGTGA  
>NF2\_LsgRNA120  
GCACGGAGGAGGAGAAGCGCCTGATGGAGC  
>NF2\_LsgRNA121  
GTCAGGAGGCAACGGTGCTGGAATTGGGTT  
>NF2\_LsgRNA122  
AGGAGGCAAAACTTCTGGCCCAGAAGGCCG  
>NF2\_LsgRNA123  
TCAAGGCCACAGCGATTTCGCACGGAGGAGG

>NF2\_LsgRNA124  
AAAAGGCCAGATCACCGAGGAGGAGGCAA  
>NF2\_LsgRNA125  
AATGGGCCTCACCTGGCTCGGCCTCGGTGC  
>NF2\_LsgRNA126  
TCGAGGCCTTGAAACTGAAAGAGAGGGAGA  
>NF2\_LsgRNA127  
ATGTGGGAGGAGAGAATTACTGCTTGGTAC  
>NF2\_LsgRNA128  
ATGAGGGAGGAGGCTGAACGCACGAGGGAT  
>NF2\_LsgRNA129  
AGAAGGTGCTGGAAGCCGAGGTGCTGGCAC  
>NF2\_LsgRNA130  
CAACGGTGCTGGAATTGGGTTTCATGGGCTG  
>NF2\_LsgRNA131  
TTGTGTACTGCAGTCCAAAGAACCAGGTTT  
>NF2\_LsgRNA132  
CAGGGTCATAAATGTGAAGCCCCAGGGCAT  
>NF2\_LsgRNA133  
TGCAGTCCAAAGAACCAGGTTTCTCGGAGC  
>NF2\_LsgRNA134  
TACGGTGTGAACTACTTTGCAATCCGGGTG  
>NF2\_LsgRNA135  
ATTGGTTTGTATTGCAGATGAAGTGAAA  
>NF2\_LsgRNA136  
TTTCTAGCCTTCTCCTCCCTGGCCTGGGCT  
>NF2\_LsgRNA137  
TCAGTATCTTTGAAGTCGAAAGACAGGCTG  
>NF2\_LsgRNA138  
TTGTTATTGCAGATGAAGTGAAAGGGAAG  
>NF2\_LsgRNA139  
GACTTCAAAGATACTGACATGAAGCGGCTT  
>NF2\_LsgRNA140  
CAGATCAGCTGAAGCAGGACCTGCAGGAAG  
>NF2\_LsgRNA141  
TCCCTCATCTGCTTCTCTCGAGCGAGGCGC  
>NF2\_LsgRNA142  
GCCCTCCTGAGGCTTCTGTGCTCCTGGCTT  
>NF2\_LsgRNA143  
TCGCTCGAGAGAAGCAGATGAGGGAGGAGG  
>NF2\_LsgRNA144  
CGCCTCGCTCGAGAGAAGCAGATGAGGGAG  
>NF2\_LsgRNA145  
TGTTTTCGGATTTTCATTCCACGGGAAGGAGA



>NF2\_LsgRNA146  
CCACTCGGGACTTGGCGCTCTGCAAGGTGA  
>NF2\_LsgRNA147  
CATCTCGTACAGTGACAAGGAGGTAGGACA  
>NF2\_LsgRNA148  
AACTTCTGGCCCAGAAGGCCGAGAGGCTG  
>NF2\_LsgRNA149  
TGGCTGAAAAGGCCCAGATCACCGAGGAGG  
>NF2\_LsgRNA150  
AGGCTGAACGCACGAGGGATGAGTTGGAGA  
>NF2\_LsgRNA151  
TCAATGAACTCAAGACAGAAATCGAGGCCT  
>NF2\_LsgRNA152  
ACAATGAATGGGCCTCACCTGGCTCGGCCT  
>NF2\_LsgRNA153  
ATACTGACATGAAGCGGCTTTCCATGGAGA  
>NF2\_LsgRNA154  
ATCCTGAGAATGCTGAAGAGGAGCTGGTTC  
>NF2\_LsgRNA155  
CTCTTGAGAGAGCTGAAGCTCATGCGGGAA  
>NF2\_LsgRNA156  
GGCCTGAGCCCCGCGCCATGGCCGGGGCCA  
>NF2\_LsgRNA157  
CGCATGAGCTTCAGCTCTCTCAAGAGGAAG  
>NF2\_LsgRNA158  
GGTCTGAGGAGACAGCTGACCTGTTGGCTG  
>NF2\_LsgRNA159  
TCTTTGATTTGGTGTGCCGGACTCTGGGGC  
>NF2\_LsgRNA160  
ATTCTGCACAATGAGAACTCCGACAGGGGT  
>NF2\_LsgRNA161  
AGATTGCCACCAAGCCCACGTACCCGGTGA  
>NF2\_LsgRNA162  
ACTGTGCCCTCCAGATGCGGTCTGAGGAGA  
>NF2\_LsgRNA163  
CTCTTGCCGGCAGAGTGGAATACATGGAAA  
>NF2\_LsgRNA164  
AGAATGCTGAAGAGGAGCTGGTTCAGGAGA  
>NF2\_LsgRNA165  
CTGCTGCTTGGAGTGGATGCCCTGGGGCTT  
>NF2\_LsgRNA166  
TACGTGGGCTTGGTGGCAATCTCCAGGAGC  
>NF2\_LsgRNA167  
ACACTGGGGTCGTAGTCACCATACTGGAAA

>NF2\_LsgRNA168  
 TCCTTGTCACGTGACGAGATGTTTCGGATT  
 >NF2\_LsgRNA169  
 ACGGTGTGAACTACTTTGCAATCCGGGTGT  
 >NF2\_LsgRNA170  
 TTTGTTATTGCAGATGAAGTGGAAAGGGAA  
 >NF2\_LsgRNA171  
 TTTCTTCACCCCTCGCAGATGGAGCGGCAG  
 >NF2\_LsgRNA172  
 TTCATTCCACGGGAAGGAGATCTTGGGGGT  
 >NF2\_LsgRNA173  
 TTCCTTCTCCTCATAAATAGATCATGGTTC  
 >NF2\_LsgRNA174  
 TGGCTTCTTACGCCGTCCAGGCCAAGGTAG  
 >NF2\_LsgRNA175  
 GAGGTGAAGCTTGGTATGTCAGGAGGCAA  
 >NF2\_LsgRNA176  
 AGTTTTGCCTCCTCCTCGGTGATCTGGGCC  
 >NF2\_LsgRNA177  
 CTTATTGGATCCACAGAATAAAAAGGGCAC  
 >NF2\_LsgRNA178  
 GATCTTGGGGTTCAGTCTGTTCTCAGGGTC

(29)  $S_{12}^-$ : 191 low on-target activity sgRNAs targeting CD5

>CD5\_LsgRNA1  
 CAGAAAAAAAAAACTGCAACAAGAGGGTA  
 >CD5\_LsgRNA2  
 TCAGAAAAGCAGCGTCAGTGGATTGGCCC  
 >CD5\_LsgRNA3  
 CCAGAAAACAACGGCCCAGGAGGGCGGCCA  
 >CD5\_LsgRNA4  
 TGGAAAACAGTGTGCAGTTCCAGTTGGAGG  
 >CD5\_LsgRNA5  
 TGGTAACACTGAGACAGCTTCTCCTGGGCA  
 >CD5\_LsgRNA6  
 CCCAAACCCAGCGGGCCTGGCCCCAGGCAC  
 >CD5\_LsgRNA7  
 AAACAACGGCCCAGGAGGGCGGCCAGGCGC  
 >CD5\_LsgRNA8  
 GGCCAAGGACAGGCCCTGGGCCTGGGGAA  
 >CD5\_LsgRNA9  
 CTACAAGGCCAAGGACAGGCCCTGGGCCT  
 >CD5\_LsgRNA10  
 GCCCAAGGTTTCAGAGCCGCTGGTCGGGGG

>CD5\_LsgRNA11  
GCTGAAGTGCGCCAGAGATCACAGTGGGAG  
>CD5\_LsgRNA12  
TCACACACACTGCTGCCCCGACCAGGCGG  
>CD5\_LsgRNA13  
GGTAACACTGAGACAGCTTCTCCTGGGCAC  
>CD5\_LsgRNA14  
TGAGACAGCTTCTCCTGGGCACAGAGGAAC  
>CD5\_LsgRNA15  
TGTGACAGTTCTGCAGCCAGGGGCCGGGA  
>CD5\_LsgRNA16  
TGCCACATACCTGCTGGGAACGCTGGGTGA  
>CD5\_LsgRNA17  
CCACACATGGCCAGCAGCACCACCAGGAGT  
>CD5\_LsgRNA18  
ACCCACCACCGTGCCGGAGCCCACAGGTAA  
>CD5\_LsgRNA19  
GGACACCAGCTCCTGCAGAGCTGAGGGACC  
>CD5\_LsgRNA20  
CCCCGACCAGGCGGCTCTGAACCTTGGGCTG  
>CD5\_LsgRNA21  
GAGCACCTCTTACCTGTGGGCTCCGGCAC  
>CD5\_LsgRNA22  
TCTTACCTGTGGGCTCCGGCACGGTGGTGG  
>CD5\_LsgRNA23  
GGGGACGGTGGGAAGAGCTATGTCGGGAGC  
>CD5\_LsgRNA24  
AGAGACTCACCCAGCGTTCCCAGCAGGTAT  
>CD5\_LsgRNA25  
ACTTACTGTTCTGGTTCACTCCTGTGGGGC  
>CD5\_LsgRNA26  
TACAAGAAGCTGGTGAAGAAATGTAGGTAC  
>CD5\_LsgRNA27  
GCCAAGACCCAAACCCAGCGGGCCTGGCCC  
>CD5\_LsgRNA28  
TTACAGATGAGGTTCCCCAGGCCAGGGGC  
>CD5\_LsgRNA29  
CCAGAGCAGATGACGGTGAGCGCTGGCCG  
>CD5\_LsgRNA30  
CTGCAGCCAGGGGCCGGGGACGGTGGGAAG  
>CD5\_LsgRNA31  
CTCCAGCTCCTCCCAGATTGCAGCTGGTGC  
>CD5\_LsgRNA32  
CACCAGCTGCAATCTGGGAGGAGCTGGAGA

>CD5\_LsgRNA33  
GCCAAGGACAGGCCCTGGGCTGGGGAAC  
>CD5\_LsgRNA34  
ACGAAGGCTGAGGTGCACAGGTGTGGTGG  
>CD5\_LsgRNA35  
ATGAAGGAAAGGACCAAGGGCCAAGGGGT  
>CD5\_LsgRNA36  
CCCAAGGTTTCAGAGCCGCTGGTCGGGGGC  
>CD5\_LsgRNA37  
CTGAAGTGCGCCAGAGATCACAGTGGGAGG  
>CD5\_LsgRNA38  
TGACAGTCTGCAGCCAGGGCCGGGGACG  
>CD5\_LsgRNA39  
CGACATAGCTCTTCCCACCGTCCCCGGCCC  
>CD5\_LsgRNA40  
CATTATCACCCACCTAGGCAGATCAGGCTC  
>CD5\_LsgRNA41  
TCCCATCGAATTGGCAAGGGCTGGGGTCC  
>CD5\_LsgRNA42  
CCTCATCTGTAAGTCTCTGCAGTGTGGCTC  
>CD5\_LsgRNA43  
CAGGATGATGCTTGCCACAGTGCCTGGGGC  
>CD5\_LsgRNA44  
GTGGATGCTGACAAAACCTCCCCGGGTTC  
>CD5\_LsgRNA45  
CTTCATTGAACAGACCCCAGAACCAGGTCT  
>CD5\_LsgRNA46  
AGGCCAAGGACAGGCCCTGGGCTGGGGA  
>CD5\_LsgRNA47  
TCTACAAGGCCAAGGACAGGCCCTGGGCC  
>CD5\_LsgRNA48  
CTGCCACATACCTGCTGGGAACGCTGGGTG  
>CD5\_LsgRNA49  
GGGACACCAGCTCCTGCAGAGCTGAGGGAC  
>CD5\_LsgRNA50  
GTGGCACCATCCTCTACAAGGCCAAGGACA  
>CD5\_LsgRNA51  
CAACCACCCACCCACCACCGTGCCGGAGC  
>CD5\_LsgRNA52  
TGTGCACCTCAGGCCTTCGTGTCTGGCAC  
>CD5\_LsgRNA53  
AGGACACGAAGGCCTGAGGTGCACAGGTGT  
>CD5\_LsgRNA54  
CTTCCAGAAAACAACGGCCCAGGAGGGCGG

>CD5\_LsgRNA55  
ACCCCAGAACCAGGTCTTCTGCCAAGGATC  
>CD5\_LsgRNA56  
CCAGCAGCACTTCGTGGGAGTCCATGGATA  
>CD5\_LsgRNA57  
TCTGCAGCCAGGGGCCGGGGACGGTGGGAA  
>CD5\_LsgRNA58  
ATCTCAGCTGTTTGCACACTGCAGAGGCCT  
>CD5\_LsgRNA59  
AGTCCAGCTTACCAGAGCAGATGACGGTGA  
>CD5\_LsgRNA60  
TCCCCAGGCCCAGGGGCCTGTCCCTGGCCT  
>CD5\_LsgRNA61  
ACCCCAGGCCCTTGCCAATTCGATGGGAGG  
>CD5\_LsgRNA62  
CGGACAGTCTGGAAGGGGTGGCCTAGGTAA  
>CD5\_LsgRNA63  
GTGACAGTTCTGCAGCCAGGGGCCGGGGAC  
>CD5\_LsgRNA64  
CGCACAGTTGCTGTGTGGCTTCGATGGAAA  
>CD5\_LsgRNA65  
GCATCATCCTGACCCTTGTACTCCTGGTGG  
>CD5\_LsgRNA66  
CTCCCATCGAATTGGCAAGGGCCTGGGGTC  
>CD5\_LsgRNA67  
AATTCCACCACACCTGTGCACCTCAGGCCT  
>CD5\_LsgRNA68  
AGCACCACCAGGAGTACAAGGGTCAGGATG  
>CD5\_LsgRNA69  
GCATCCACCCTGTGGAAGGAGATGAGGTCTG  
>CD5\_LsgRNA70  
GCTTCCAGAAAACAACGGCCCAGGAGGGCG  
>CD5\_LsgRNA71  
GACCCCAGGCCCTTGCCAATTCGATGGGAG  
>CD5\_LsgRNA72  
CCTCCCATCGAATTGGCAAGGGCCTGGGGT  
>CD5\_LsgRNA73  
AGGACCATTGAAAAATGCCCAGCAGGCCT  
>CD5\_LsgRNA74  
TCCTCCCAGATTGCAGCTGGTGCCAGGACA  
>CD5\_LsgRNA75  
CCTCCCCGGGTTCTCTGTGCCCAGGAGA  
>CD5\_LsgRNA76  
AGGCCCGAGCACCTCTTACCTGTGGGCTC

>CD5\_LsgRNA77  
GCGACCTCATCTCCTTCCACACGGTGGATG  
>CD5\_LsgRNA78  
AAGGCCTGAGGTGCACAGGTGTGGTGAAT  
>CD5\_LsgRNA79  
GTGTCCTGGCACCAGCTGCAATCTGGGAGG  
>CD5\_LsgRNA80  
CGCTCCTGGGAACACTTACTGTTCTGGTTC  
>CD5\_LsgRNA81  
TTCTCCTGGGCACAGAGGAACCCGGGGGAG  
>CD5\_LsgRNA82  
GCTCCGGCACGGTGGTGGGTGGGTGGTTG  
>CD5\_LsgRNA83  
TGGTCGGGGCAGCAGTGTGTGTGAGGGCA  
>CD5\_LsgRNA84  
GCAGCGTCAGTGGATTGGCCCCACAGGAGT  
>CD5\_LsgRNA85  
AGAGCTATGTCGGGAGCAGCAGTGTGGCGA  
>CD5\_LsgRNA86  
GGATCTCCACTTGACCCTGACACTTGAAT  
>CD5\_LsgRNA87  
TGGGCTCCGGCACGGTGGTGGGTGGGTGG  
>CD5\_LsgRNA88  
GCTTCTCCTGGGCACAGAGGAACCCGGGGG  
>CD5\_LsgRNA89  
CTGCCTCGGACAGTCTGGAAGGGGTGGCCT  
>CD5\_LsgRNA90  
GCTCCTGCAGAGCTGAGGGACCCCAGGCC  
>CD5\_LsgRNA91  
AGTTCTGCAGCCAGGGGCCGGGGACGGTGG  
>CD5\_LsgRNA92  
CTTTCTGCCTCGGACAGTCTGGAAGGGGTG  
>CD5\_LsgRNA93  
GGGCCTGGGGTCCCTCAGCTCTGCAGGAGC  
>CD5\_LsgRNA94  
ACATCTGTCCGGGACAGAGGCAGCAGGGAC  
>CD5\_LsgRNA95  
CTTACTGTTCTGGTTCCTCCTGTGGGGCC  
>CD5\_LsgRNA96  
CCCTCTTACCTGTGGGCTCCGGCACGGTGG  
>CD5\_LsgRNA97  
AGTGCTTCCAGAAAACAACGGCCCAGGAGG  
>CD5\_LsgRNA98  
GATCCTTGGCAGAAGACCTGGTTCTGGGGT

>CD5\_LsgRNA99  
GGCTCTTCTTGACACATCTGTCCGGGACA  
>CD5\_LsgRNA100  
CATCGAAGCCACACAGCAACTGTGCGGTCC  
>CD5\_LsgRNA101  
GGTGAATTCTACAATGGCAGCTGGGGTGG  
>CD5\_LsgRNA102  
TCTTGACACATCTGTCCGGGACAGAGGCAG  
>CD5\_LsgRNA103  
CCCCGACCAGGCGGCTCTGAACCTTGGGCT  
>CD5\_LsgRNA104  
CGGGGACGGTGGGAAGAGCTATGTCGGGAG  
>CD5\_LsgRNA105  
CGGTGAGCGCCTGGCCGCCCTCCTGGGCCG  
>CD5\_LsgRNA106  
TACAGATGAGGTTCCCCAGGCCAGGGGCC  
>CD5\_LsgRNA107  
GGTGGATGCTGACAAAACCTCCCCGGGTT  
>CD5\_LsgRNA108  
GGATGATGCTTGCCACAGTGCCCTGGGGCCA  
>CD5\_LsgRNA109  
GCCAGCAGCACCACCAGGAGTACAAGGGTC  
>CD5\_LsgRNA110  
CCAGGCCCTTGCCAATTGATGGGAGGCC  
>CD5\_LsgRNA111  
CGGGGCCTCCCATCGAATTGGCAAGGGCCT  
>CD5\_LsgRNA112  
AGGGGCCTGTCCTTGGCCTTGTAGAGGATG  
>CD5\_LsgRNA113  
AAGTGCGCCAGAGATCACAGTGGGAGGCC  
>CD5\_LsgRNA114  
CCAGGCGCTCACCGTCATCTGCTCTGGTAA  
>CD5\_LsgRNA115  
GTGGGCTCCGGCACGGTGGTGGGTGGGGTG  
>CD5\_LsgRNA116  
TGCTGCTGGCCATGTGTGGTCCCTCTGGTCT  
>CD5\_LsgRNA117  
GCCCGCTGGGTTTGGGTCTTGGCCTGGATA  
>CD5\_LsgRNA118  
AGCGGCTTCTGCCTCGGACAGTCTGGAAG  
>CD5\_LsgRNA119  
TGGTGAATTCTACAATGGCAGCTGGGGTG  
>CD5\_LsgRNA120  
CCATGGACTCCCACGAAGTGCTGCTGGCTG

>CD5\_LsgRNA121  
CCTGGGCACAGAGGAACCCGGGGGAGGTTT  
>CD5\_LsgRNA122  
ATGTGGCAGCCAGCAGCACTTCGTGGGAGT  
>CD5\_LsgRNA123  
TCCAGGCCAAGACCCAAACCCAGCGGGCCT  
>CD5\_LsgRNA124  
GCCAGGCCCGCTGGGTTTGGGTCTTGGCCT  
>CD5\_LsgRNA125  
TCGGGGCCTCCCATCGAATTGGCAAGGGCC  
>CD5\_LsgRNA126  
ACCAGGCGGCTCTGAACCTTGGGCTGGAAA  
>CD5\_LsgRNA127  
TGTGGGCTCCGGCACGGTGGTGGGTGGGGT  
>CD5\_LsgRNA128  
CCCTGGCTGCAGAACTGTCACACAGGGCCT  
>CD5\_LsgRNA129  
ACTTGGGACCGCACAGTTGCTGTGTGGCTT  
>CD5\_LsgRNA130  
CCTGGGGCCAGGCCCGCTGGGTTTGGGTCT  
>CD5\_LsgRNA131  
CACAGGGCCTCCCCTGTGATCTCTGGCGC  
>CD5\_LsgRNA132  
GCCTGGGGCCAGGCCCGCTGGGTTTGGGTC  
>CD5\_LsgRNA133  
GGTCGGGGGCAGCAGTGTGTGTGAGGGCAT  
>CD5\_LsgRNA134  
TTGTGGGTGGAGGTGTCGTTCTCTGGGGCT  
>CD5\_LsgRNA135  
GCTGGGGTGGCACCATCCTCTACAAGGCCA  
>CD5\_LsgRNA136  
TGTGGGTGGAGGTGTCGTTCTCTGGGGCTC  
>CD5\_LsgRNA137  
GCACGGTGGTGGGTGGGGTGGTTGTGGGTG  
>CD5\_LsgRNA138  
CCAAGGTTTCAGAGCCGCTGGTCGGGGGCA  
>CD5\_LsgRNA139  
GTTTCGTCAGAAAAAGCAGCGTCAGTGGATT  
>CD5\_LsgRNA140  
TTTTGTCAGCATCCACCGTGTGGAAGGAGA  
>CD5\_LsgRNA141  
AATGGTCCTGGCTCAGCCTCCAACCTGGAAC  
>CD5\_LsgRNA142  
TGTAGTGAGACACAGCTCCCGTTCGGGGCC



>CD5\_LsgRNA143  
CACAGTGCCTGGGGCCAGGCCCGCTGGGTT  
>CD5\_LsgRNA144  
ACCTGTGGGCTCCGGCACGGTGGTGGGTGG  
>CD5\_LsgRNA145  
GGTGGTGGGTGGGGTGGTTGTGGGTGGAGG  
>CD5\_LsgRNA146  
CCTGGTGGTGCTGCTGGCCATGTGTGGTCC  
>CD5\_LsgRNA147  
CACGGTGGTGGGTGGGGTGGTTGTGGGTGG  
>CD5\_LsgRNA148  
CCCTGTGTGACAGTTCTGCAGCCAGGGGCC  
>CD5\_LsgRNA149  
CAAGGTTCAAGCCGCCTGGTCGGGGGCAG  
>CD5\_LsgRNA150  
CTGTTCAATGAAGGGAAAGGACCAAGGGCC  
>CD5\_LsgRNA151  
CTTTTCCACAGCGGCTTTCTGCCTCGGACA  
>CD5\_LsgRNA152  
GGGGTCCCTCAGCTCTGCAGGAGCTGGTGT  
>CD5\_LsgRNA153  
ACCATCCTCTACAAGGCCAAGGACAGGCCC  
>CD5\_LsgRNA154  
GTGGTCCTCTGGTCTACAAGAAGCTGGTGA  
>CD5\_LsgRNA155  
CGTGTCTTGGCACCAGCTGCAATCTGGGAG  
>CD5\_LsgRNA156  
CTTCTCCTGGGCACAGAGGAACCCGGGGGA  
>CD5\_LsgRNA157  
GCTTTCTGCCTCGGACAGTCTGGAAGGGGT  
>CD5\_LsgRNA158  
TGGCTCTTTCTTGACACATCTGTCCGGGAC  
>CD5\_LsgRNA159  
CTTGTGAACTTGTGTTGTTGCAGTTGGATA  
>CD5\_LsgRNA160  
GTAGTGAGACACAGCTCCCGTTCGGGGCCT  
>CD5\_LsgRNA161  
ACGGTGAGCGCCTGGCCGCCCTCCTGGGCC  
>CD5\_LsgRNA162  
AGGATGATGCTTGCCACAGTGCTGGGGCC  
>CD5\_LsgRNA163  
TGTTTGCACACTGCAGAGGCCTGCTGGGCA  
>CD5\_LsgRNA164  
CTGGTGCCAGGACACGAAGGCCTGAGGTGC

>CD5\_LsgRNA165  
TTTCTGCCTCGGACAGTCTGGAAGGGGTGG  
>CD5\_LsgRNA166  
ACAGTGCCTGGGGCCAGGCCCGCTGGGTTT  
>CD5\_LsgRNA167  
GTGGTGAATTCTACAATGGCAGCTGGGGT  
>CD5\_LsgRNA168  
GAATTGGAGCCACTTAGCATCACCTGGATA  
>CD5\_LsgRNA169  
TCCTTGGCAGAAGACCTGGTTCTGGGGTCT  
>CD5\_LsgRNA170  
TAAGTGGCTCCAATTCCAAGTGCAGGGTC  
>CD5\_LsgRNA171  
CCCCTGGCTGCAGAAGTGCACACAGGGCC  
>CD5\_LsgRNA172  
GTTGTGGGTGGAGGTGTCGTTCTCTGGGGC  
>CD5\_LsgRNA173  
CCCTTGTACTCCTGGTGGTGCTGCTGGCCA  
>CD5\_LsgRNA174  
CTGGTGTCCCTGCTGCCTCTGTCCCGGACA  
>CD5\_LsgRNA175  
CATCTGTCCGGGACAGAGGCAGCAGGGACA  
>CD5\_LsgRNA176  
CCTGTGTGACAGTTCTGCAGCCAGGGGCCG  
>CD5\_LsgRNA177  
TACCTGTGGGCTCCGGCACGGTGGTGGGTG  
>CD5\_LsgRNA178  
GAGATGTGGTGACCCCTTGGCCCTTGGTCC  
>CD5\_LsgRNA179  
GCCCTGTGTGACAGTTCTGCAGCCAGGGGC  
>CD5\_LsgRNA180  
TTACTGTTCTGGTTCACTCCTGTGGGGCCA  
>CD5\_LsgRNA181  
CCAATTCCAAGTGTGTCAGGGTCAAGTGGAGA  
>CD5\_LsgRNA182  
GCAGTCCAGTTGGAGGCTGAGCCAGGACC  
>CD5\_LsgRNA183  
GCTCTTCCCACCGTCCCCGGCCCCCTGGCTG  
>CD5\_LsgRNA184  
CCAATTCGATGGGAGGCCCGAACGGGAGC  
>CD5\_LsgRNA185  
CCCGTTCGGGGCCTCCCATCGAATTGGCAA  
>CD5\_LsgRNA186  
GGAATTCTACAATGGCAGCTGGGGTGGCAC

>CD5\_LsgRNA187  
 TCCTTTCTGCAGATTTCCAGCCCAAGGTTC  
 >CD5\_LsgRNA188  
 CTGGTTCTGGGGTCTGTTCAATGAAGGGAA  
 >CD5\_LsgRNA189  
 CCACTTGACCCTGACACTTGAATTTGGAGC  
 >CD5\_LsgRNA190  
 ATGCTTGCCACAGTGCCTGGGGCCAGGCC  
 >CD5\_LsgRNA191  
 ATCCTTGGCAGAAGACCTGGTTCTGGGGTC

(30)  $S_{13}^-$ : 59 low on-target activity sgRNAs targeting CD28

>CD28\_LsgRNA1  
 AACGAAACAGTGACGTTCCGTCTCTGGAAT  
 >CD28\_LsgRNA2  
 TGGTAAAGCAGTCGCCCCTGCTTGTGGTAG  
 >CD28\_LsgRNA3  
 CTGCAAAGTCTCTGGCAGGGGCGTAGGGCT  
 >CD28\_LsgRNA4  
 CATGAACATGACTCCCCGGAGGCCTGGGCT  
 >CD28\_LsgRNA5  
 TGCAAAGTCTCTGGCAGGGGCGTAGGGCTG  
 >CD28\_LsgRNA6  
 CTCGAATGCCGAGTTCAACTGCGACGGGGA  
 >CD28\_LsgRNA7  
 ATGAACATGACTCCCCGGAGGCCTGGGCTC  
 >CD28\_LsgRNA8  
 TACAACCTTCTCGCAAAGGAATTCCGGGCA  
 >CD28\_LsgRNA9  
 AGCAACGAGGTCAGCCTCAGCTGCAGGTAT  
 >CD28\_LsgRNA10  
 CGGTACGCTGCAAAGTCTCTGGCAGGGGCG  
 >CD28\_LsgRNA11  
 AGTGACTACATGAACATGACTCCCCGGAGG  
 >CD28\_LsgRNA12  
 TTGAACTCGGCATTCGAGCGAAACTGGGGC  
 >CD28\_LsgRNA13  
 GAACAGCGACGTGGAAGTCTGTGTCGGGAA  
 >CD28\_LsgRNA14  
 ACTCAGTCATCTCCTAAGCTGTTTTGGGCA  
 >CD28\_LsgRNA15  
 TGACAGTGGCTCTTTGTGTTATCTGGGTAA  
 >CD28\_LsgRNA16  
 CTGGATAGGGTCCCTGTTCAGGGGCGGTAC

>CD28\_LsgRNA17  
CGAAATCCCCGTCGCAGTTGAACTCGGCAT  
>CD28\_LsgRNA18  
TCGAATGCCGAGTTCAACTGCGACGGGGAT  
>CD28\_LsgRNA19  
AGGAATTCGGGCATCCCTGTACAAGGGCG  
>CD28\_LsgRNA20  
TGTACAAGGGCGTGAACAGCGACGTGGAAG  
>CD28\_LsgRNA21  
GTGACAGTGGCTCTTTGTGTTATCTGGGTA  
>CD28\_LsgRNA22  
GTTCCATTGCTCCTCTCGTTGTCTAGGTAA  
>CD28\_LsgRNA23  
TTCCCCCCTAGACAAATAGTAGAAGGAAC  
>CD28\_LsgRNA24  
GATGCCCGGAATTCCTTTGCGAGAAGGTTG  
>CD28\_LsgRNA25  
TTTTCCCTTCAGAAAACAAGATTTTGGTAA  
>CD28\_LsgRNA26  
ACAACCTTCTCGCAAAGGAATTCCGGGCAT  
>CD28\_LsgRNA27  
CATTTCGAGCGAAACTGGGGCTGATAGGTAA  
>CD28\_LsgRNA28  
CTTTCGAGTGAGCCCAGGCCTCCGGGGAGT  
>CD28\_LsgRNA29  
TTCACGCCCTTGTACAGGGATGCCCGGAAT  
>CD28\_LsgRNA30  
CCTCCGCCTTACCTAGACAACGAGAGGAGC  
>CD28\_LsgRNA31  
GGTACGCTGCAAAGTCTCTGGCAGGGGCGT  
>CD28\_LsgRNA32  
ACGTCGCTGTTACGCCCTTGTACAGGGAT  
>CD28\_LsgRNA33  
ACCTCGTTGCTATCTACCACAAGCAGGGGC  
>CD28\_LsgRNA34  
GTCACTAGCAAGCCATAACAAAACAGGACT  
>CD28\_LsgRNA35  
ATTGCTCCTCTCGTTGTCTAGGTAAGGCGG  
>CD28\_LsgRNA36  
TGAACTCGGCATTCGAGCGAAACTGGGGCT  
>CD28\_LsgRNA37  
AAGTCTCTGGCAGGGGCGTAGGGCTGGTAA  
>CD28\_LsgRNA38  
CTTTGCAGCGTACCGCCCCTGACAGGGACC

>CD28\_LsgRNA39  
 TCTGGCAGGGGCGTAGGGCTGGTAAGGCTT  
 >CD28\_LsgRNA40  
 AACAGCGACGTGGAAGTCTGTGTCGGGAAT  
 >CD28\_LsgRNA41  
 AGGGGCGGTACGCTGCAAAGTCTCTGGCAG  
 >CD28\_LsgRNA42  
 CGTCGCTGTTACGCCCTTGTACAGGGATG  
 >CD28\_LsgRNA43  
 CAATGGAACTATTATTACATAAAAAGGTAA  
 >CD28\_LsgRNA44  
 CGACGTGGAAGTCTGTGTCGGGAATGGGAA  
 >CD28\_LsgRNA45  
 GTCTGTTCCCTTCTACTATTTGTCTAGGGGG  
 >CD28\_LsgRNA46  
 CTGGTAAGGCTTTCGAGTGAGCCCAGGCCT  
 >CD28\_LsgRNA47  
 GCGGTACGCTGCAAAGTCTCTGGCAGGGGC  
 >CD28\_LsgRNA48  
 GCTTTCGAGTGAGCCCAGGCCTCCGGGGAG  
 >CD28\_LsgRNA49  
 CCTCTCGTTGTCTAGGTAAGGCGGAGGGTA  
 >CD28\_LsgRNA50  
 ACTTTGCAGCGTACCGCCCCTGACAGGGAC  
 >CD28\_LsgRNA51  
 CGAATGCCGAGTTCAACTGCGACGGGGATT  
 >CD28\_LsgRNA52  
 GACGTGGAAGTCTGTGTCGGGAATGGGAAT  
 >CD28\_LsgRNA53  
 CTTCTGGATAGGGGTCCCTGTCAGGGGCGG  
 >CD28\_LsgRNA54  
 GTTTTGGGCACTGGTTCGTGGTTGCTGGAGT  
 >CD28\_LsgRNA55  
 GTCATGTTTCATGTAGTCACTTTGAAGGAGT  
 >CD28\_LsgRNA56  
 TTTGTTATGGCTTGCTAGTGACAGTGGCTC  
 >CD28\_LsgRNA57  
 GGTATTCCTACAACCTTCTCGCAAAGGAAT  
 >CD28\_LsgRNA58  
 GGAATTCCTTTGCGAGAAGGTTGTAGGAAT  
 >CD28\_LsgRNA59  
 GGCTTTCGAGTGAGCCCAGGCCTCCGGGGA

(31)  $S_{14}^-$ : 135 low on-target activity sgRNAs targeting H2-K

>H2-K\_LsgRNA1  
CACCAAACACAAGTGGGAGCAGGCTGGTGA  
>H2-K\_LsgRNA2  
CCAGAACAGCAACGGTCGCCATGTTGGAGA  
>H2-K\_LsgRNA3  
CGCCAACAGCAGGAGCAGCGTGCACGGTAC  
>H2-K\_LsgRNA4  
CGGGAACGCGACGCTGCTGCGCACAGGTGC  
>H2-K\_LsgRNA5  
TGAAAACGTGGACGGCGGCGGACATGGCGG  
>H2-K\_LsgRNA6  
GATGAAGATGAGAAGGAGAAACACAGGTAG  
>H2-K\_LsgRNA7  
CTCCAAGGACAACCAGAACAGCAACGGTCG  
>H2-K\_LsgRNA8  
CTGCAATAGTCACTGGAGCTGTGGTGGCTT  
>H2-K\_LsgRNA9  
GGAGACAGTGGATGGAGGAGGCTCTGGGAA  
>H2-K\_LsgRNA10  
TTACACATGCCATGTGTACCATCAGGGGCT  
>H2-K\_LsgRNA11  
CAGGACATGGAGCTTGTGGAGACCAGGCCT  
>H2-K\_LsgRNA12  
CATCACCTGACCTGGCAGTTGAATGGGGA  
>H2-K\_LsgRNA13  
AGTCACCCTGAGGTGCTGGGCCCTGGGCTT  
>H2-K\_LsgRNA14  
AAATACCTCAGCGAGTGTGGGCCTGGGGGC  
>H2-K\_LsgRNA15  
GGTGACGAAATACCTCAGCGAGTGTGGGCC  
>H2-K\_LsgRNA16  
AGCCACTCCACGCACGTGCCCTCCAGGTAG  
>H2-K\_LsgRNA17  
ACGAAGACCTGAAAACGTGGACGGCGGCGG  
>H2-K\_LsgRNA18  
AGAGAGACTCAGGGCCTACCTGGAGGGCAC  
>H2-K\_LsgRNA19  
GAGCAGAGTTTCCGAGTGGACCTGAGGACC  
>H2-K\_LsgRNA20  
ATGGAGCAGGAGGGGCCCGAGTATTGGGAG  
>H2-K\_LsgRNA21  
TAGAAGCCCAGGGCCCAGCACCTCAGGGTG  
>H2-K\_LsgRNA22  
TCGCAGCCGTCGTAGGCGTACTGCTGGTAC

>H2-K\_LsgRNA23  
TGCCAGGTCAGGGTGATGTCAGCAGGGTAG  
>H2-K\_LsgRNA24  
TTGTAGTAGCCGAGCAGGGTCCTCAGGTCC  
>H2-K\_LsgRNA25  
TGGAAGTCGGCTACGTGGACGACACGGAGT  
>H2-K\_LsgRNA26  
GAAGATAAAGTCACCCTGAGGTGCTGGGCC  
>H2-K\_LsgRNA27  
CTTTATCTTCAGGTCTGCTGTGATGGGTCA  
>H2-K\_LsgRNA28  
TGTGATGGGTCACATGGGCCTTTGGGGAAT  
>H2-K\_LsgRNA29  
CGCCATGTTGGAGACAGTGGATGGAGGAGG  
>H2-K\_LsgRNA30  
AGGTATTTTCGTCACCGCCGTGTCCCGGCC  
>H2-K\_LsgRNA31  
CTCTCACACTATTCAGGTGATCTCTGGCTG  
>H2-K\_LsgRNA32  
ATTACACATGCCATGTGTACCATCAGGGGC  
>H2-K\_LsgRNA33  
AAGTCACCCTGAGGTGCTGGGCCCTGGGCT  
>H2-K\_LsgRNA34  
ACTCCACGCACGTGCCCTCCAGGTAGGCC  
>H2-K\_LsgRNA35  
CGTGCACGCTGCTCCTGCTGTTGGCGGCCG  
>H2-K\_LsgRNA36  
CCCACACTCTCCTTACCCCATCTCAGGGTG  
>H2-K\_LsgRNA37  
CTGCCAGGTCAGGGTGATGTCAGCAGGGTA  
>H2-K\_LsgRNA38  
GCTCCAGTGACTATTGCAGCTCCAAGGACA  
>H2-K\_LsgRNA39  
GAGACAGTGGATGGAGGAGGCTCTGGGAAG  
>H2-K\_LsgRNA40  
ACCCCATCTCAGGGTGAGGGGCTCAGGCAG  
>H2-K\_LsgRNA41  
TGGGCATCTGTGGTGGTGCCTCTTGGGAAG  
>H2-K\_LsgRNA42  
TACACATGCCATGTGTACCATCAGGGGCTG  
>H2-K\_LsgRNA43  
CCAACATGGCGACCGTTGCTGTTCTGGTTG  
>H2-K\_LsgRNA44  
GGCACCACCACAGATGCCCACTTCTGGAAG

>H2-K\_LsgRNA45  
CCTTCCAGAAGTGGGCATCTGTGGTGGTGC  
>H2-K\_LsgRNA46  
GGAGCCAGGGCGGCCGCAACAGCAGGAGC  
>H2-K\_LsgRNA47  
CCTCCCATTCAACTGCCAGGTCAGGGTGA  
>H2-K\_LsgRNA48  
CCGCCCCAGGCCACACTCGCTGAGGTAT  
>H2-K\_LsgRNA49  
TCCTCCCATTCAACTGCCAGGTCAGGGTG  
>H2-K\_LsgRNA50  
GCTCCCCGAGGCCGGGCCGGGACACGGCGG  
>H2-K\_LsgRNA51  
GGTACCCGCGGAGGAGTCGCCCGTCGGACC  
>H2-K\_LsgRNA52  
ATCACCTGACCTGGCAGTTGAATGGGGAG  
>H2-K\_LsgRNA53  
GGGTCCGACGGGCGACTCCTCCGCGGGTAC  
>H2-K\_LsgRNA54  
ACCGCCGTGTCCCGGCCCGCCCTCGGGGAG  
>H2-K\_LsgRNA55  
CCGGCCTCGGGGAGCCCCGGTACATGGAAG  
>H2-K\_LsgRNA56  
AAGACCTGAAAACGTGGACGGCGGCGACA  
>H2-K\_LsgRNA57  
TCACCCTGACCTGGCAGTTGAATGGGGAGG  
>H2-K\_LsgRNA58  
TGCTCCTGCTGTTGGCGGCCCGCCCTGGCTC  
>H2-K\_LsgRNA59  
CTCTCCTTACCCCATCTCAGGGTGAGGGGC  
>H2-K\_LsgRNA60  
AATCCGAGATATGAGCCGCGGGCGCGGTGG  
>H2-K\_LsgRNA61  
GTCCCGCAGGCTCTCACACTATTCAGGTGA  
>H2-K\_LsgRNA62  
CCACCGCGCCCGCGGCTCATATCTCGGATT  
>H2-K\_LsgRNA63  
CCC CGCGGGTCTGAGTCGGAGCCAGGGCG  
>H2-K\_LsgRNA64  
CGGGCGCGGTGGATGGAGCAGGAGGGGCC  
>H2-K\_LsgRNA65  
TGCTCGGCTACTACAACCAGAGCAAGGGCG  
>H2-K\_LsgRNA66  
GGAGCGGGAGACACAGAAAGCCAAGGGCAA



>H2-K\_LsgRNA67  
AGTTTCGTGCGCTTCGACAGCGACGCGGAGA  
>H2-K\_LsgRNA68  
CCGCCGTGTCCCGGCCCGCCTCGGGGAGC  
>H2-K\_LsgRNA69  
GGGCTACCTGGAGGGCACGTGCGTGGAGT  
>H2-K\_LsgRNA70  
GCACCTCAGGGTGACTTTATCTTCAGGTCT  
>H2-K\_LsgRNA71  
GTGGCTCCGCAGATACCTGAAGAACGGGAA  
>H2-K\_LsgRNA72  
TCAGCTCCTCCCCATTCAACTGCCAGGTCA  
>H2-K\_LsgRNA73  
CTGCCTGAGCCCCTCACCTGAGATGGGGT  
>H2-K\_LsgRNA74  
CAGGCTGGTGAAGCAGAGAGACTCAGGGCC  
>H2-K\_LsgRNA75  
TCTCCTTACCCCATCTCAGGGTGAGGGGCT  
>H2-K\_LsgRNA76  
GAACCTTCCAGAAGTGGGCATCTGTGGTGG  
>H2-K\_LsgRNA77  
TGTCCCTTGAGCTGCAATAGTCACTGGAGC  
>H2-K\_LsgRNA78  
GGAGCTTGTGGAGACCAGGCCTGCAGGGGA  
>H2-K\_LsgRNA79  
CGGAGAATCCGAGATATGAGCCGCGGGCGC  
>H2-K\_LsgRNA80  
AGTTGAATGGGGAGGAGCTGATCCAGGACA  
>H2-K\_LsgRNA81  
TGTGGAGACCAGGCCTGCAGGGGATGGAAC  
>H2-K\_LsgRNA82  
CGGGGAGCCCCGGTACATGGAAGTCGGCTA  
>H2-K\_LsgRNA83  
GCCTGAGCCCCTCACCTGAGATGGGGTAA  
>H2-K\_LsgRNA84  
AGCTGATCCAGGACATGGAGCTTGTGGAGA  
>H2-K\_LsgRNA85  
CTGTGATGGGTACATGGGCCTTTGGGGAA  
>H2-K\_LsgRNA86  
GGGCGATGTAATCGCAGCCGTCGTAGGCGT  
>H2-K\_LsgRNA87  
TCAGGCAGCCCCTGATGGTACACATGGCAT  
>H2-K\_LsgRNA88  
TGGAGCAGGAGGGGCCCGAGTATTGGGAGC

>H2-K\_LsgRNA89  
GTGGGCATCTGTGGTGGTGCCCTCTTGGGAA  
>H2-K\_LsgRNA90  
GGTCGCCATGTTGGAGACAGTGGATGGAGG  
>H2-K\_LsgRNA91  
AGAAGCCCAGGGCCCAGCACCTCAGGGTGA  
>H2-K\_LsgRNA92  
CACCGCCGTGTCCCGGCCCGCCTCGGGGA  
>H2-K\_LsgRNA93  
AGCAGCGTCGCGTTCCCGTTCTTCAGGTAT  
>H2-K\_LsgRNA94  
CCTGGCTCCGACTCAGACCCGCGCGGGTGA  
>H2-K\_LsgRNA95  
TCCCGGCCCGGTACTCACCCGCGCGGGTCT  
>H2-K\_LsgRNA96  
GCTCGGCTACTACAACCAGAGCAAGGGCGG  
>H2-K\_LsgRNA97  
CTCTGGCTGTGAAGTGGGGTCCGACGGGCG  
>H2-K\_LsgRNA98  
ACCGGGGCTCCCCGAGGCCGGGCCGGGACA  
>H2-K\_LsgRNA99  
GTGAGGGGCTCAGGCAGCCCCTGATGGTAC  
>H2-K\_LsgRNA100  
CAACGGTCGCCATGTTGGAGACAGTGGATG  
>H2-K\_LsgRNA101  
TTCAGGTGATCTCTGGCTGTGAAGTGGGGT  
>H2-K\_LsgRNA102  
GGAAGGTTCCATCCCCTGCAGGCCTGGTCT  
>H2-K\_LsgRNA103  
CCATGTACCGGGGCTCCCCGAGGCCGGGCC  
>H2-K\_LsgRNA104  
TTTCGTCACCGCCGTGTCCCGGCCCGGCCT  
>H2-K\_LsgRNA105  
TGATGTCAGCAGGGTAGAAGCCCAGGGCCC  
>H2-K\_LsgRNA106  
TCAGGTCTGCTGTGATGGGTCACATGGGCC  
>H2-K\_LsgRNA107  
TCAGGTGATCTCTGGCTGTGAAGTGGGGTC  
>H2-K\_LsgRNA108  
TACCGTGCACGCTGCTCCTGCTGTTGGCGG  
>H2-K\_LsgRNA109  
CCGAGTGGACCTGAGGACCCTGCTCGGCTA  
>H2-K\_LsgRNA110  
AAACGTGGACGGCGGCGGACATGGCGGCGC

>H2-K\_LsgRNA111  
GACCGTTGCTGTTCTGGTTGTCCTTGGAGC  
>H2-K\_LsgRNA112  
AAGATAAAGTCACCCTGAGGTGCTGGGCCC  
>H2-K\_LsgRNA113  
CATGTACCGGGGCTCCCCGAGGCCGGGCCG  
>H2-K\_LsgRNA114  
GAAATACCTCAGCGAGTGTGGGCCTGGGGG  
>H2-K\_LsgRNA115  
ACTTTATCTTCAGGTCTGCTGTGATGGGTC  
>H2-K\_LsgRNA116  
GTACTCACCCGCGCGGGTCTGAGTCGGAGC  
>H2-K\_LsgRNA117  
CTCCTCCATCCACTGTCTCCAACATGGCGA  
>H2-K\_LsgRNA118  
GCGTTCCCGTTCTTCAGGTATCTGCGGAGC  
>H2-K\_LsgRNA119  
GGGGTCCGACGGGCGACTCCTCCGCGGGTA  
>H2-K\_LsgRNA120  
TGGCTCCGCAGATACCTGAAGAACGGGAAC  
>H2-K\_LsgRNA121  
CTGGTCTCCACAAGCTCCATGTCCTGGATC  
>H2-K\_LsgRNA122  
TTGCTCTGGTTGTAGTAGCCGAGCAGGGTC  
>H2-K\_LsgRNA123  
GCCCTGAACGAAGACCTGAAAACGTGGACG  
>H2-K\_LsgRNA124  
TGCCTGAGCCCCTCACCTGAGATGGGGTA  
>H2-K\_LsgRNA125  
GATATGAGCCGCGGGCGCGGTGGATGGAGC  
>H2-K\_LsgRNA126  
CAGGTGATCTCTGGCTGTGAAGTGGGGTCC  
>H2-K\_LsgRNA127  
GCTGTGATGGGTCACATGGGCCTTTGGGGA  
>H2-K\_LsgRNA128  
GAGCTGCAATAGTCACTGGAGCTGTGGTGG  
>H2-K\_LsgRNA129  
CTCCTGCTCCATCCACCGCGCCCGCGGCTC  
>H2-K\_LsgRNA130  
CTTCTGGAAGGTTCCATCCCCTGCAGGCCT  
>H2-K\_LsgRNA131  
TACCTGGAGGGCACGTGCGTGGAGTGGCTC  
>H2-K\_LsgRNA132  
CATCTGTGGTGGTGCCTCTTGGGAAGGAGC

>H2-K\_LsgRNA133  
 CTCCTTACCCCATCTCAGGGTGAGGGGCTC  
 >H2-K\_LsgRNA134  
 CATGTTGGAGACAGTGGATGGAGGAGGCTC  
 >H2-K\_LsgRNA135  
 GAGCTTGTGGAGACCAGGCCTGCAGGGGAT

(32)  $S_{15}^-$ : 210 low on-target activity sgRNAs targeting CD45

>CD45\_LsgRNA1  
 ATACAAAAGGAAGATTGCTGATGAGGGCAG  
 >CD45\_LsgRNA2  
 CCAGAAACGCCTAAGCCTAGTTGTGGGGAT  
 >CD45\_LsgRNA3  
 AAGGAAAGCAGACTTATGGAGACATGGAAG  
 >CD45\_LsgRNA4  
 AGCAAAAAGGCCACAGTTATTGTCATGGTCA  
 >CD45\_LsgRNA5  
 TCCAAAATGCTAAGTGTGGAAATGAGGATT  
 >CD45\_LsgRNA6  
 TTCCAACAAAATGTCAGAATGGATTGGCTC  
 >CD45\_LsgRNA7  
 GATGAACAACAGGAACTCGTTGAAAGGGGT  
 >CD45\_LsgRNA8  
 CAGGAACCCCATGGTCTGGCCAGCTGGTGA  
 >CD45\_LsgRNA9  
 CAAGAAGAAAATAAGAAGAAGAACAGGAAT  
 >CD45\_LsgRNA10  
 CTA AAAAGAAACGATCGGTGACTTTTGGCAG  
 >CD45\_LsgRNA11  
 GGCCAAGCATGGAGGAAGGCACTCGGGCTT  
 >CD45\_LsgRNA12  
 TGGAAAGTGCAGAAACAGAAGATGTGGTTG  
 >CD45\_LsgRNA13  
 CCTGAATCATAGACACCAGGTCTTTGGGTT  
 >CD45\_LsgRNA14  
 TGTCAATGGGAAGATTCAAAGAAATGGGAC  
 >CD45\_LsgRNA15  
 ATGAACAACAGGAACTCGTTGAAAGGGGTG  
 >CD45\_LsgRNA16  
 AGGCACAGAACAACCCTGTCTGCTGGGATC  
 >CD45\_LsgRNA17  
 AGGCACAGTATATCCTGATTCATCAGGCTT  
 >CD45\_LsgRNA18  
 AGCTACCACAACGAAGCAAACATGTGGTAA

>CD45\_LsgRNA19  
ACTTACCACATGTTTGCTTCGTTGTGGTAG  
>CD45\_LsgRNA20  
AGACACCAGGTCTTTGGGTTCTGCAGGCAG  
>CD45\_LsgRNA21  
GTGTACCAGTACCAGTGTACCACATGGAAA  
>CD45\_LsgRNA22  
CAGTACCAGTGTACCACATGGAAAAGGGGAA  
>CD45\_LsgRNA23  
ATCCACCCAGTGACCCCTCCCCTCTGGAGG  
>CD45\_LsgRNA24  
CCTCACCTGCTCCTCAAACCTTCGACGGAGA  
>CD45\_LsgRNA25  
TGCTACCTGGTATTTCAGCCTCCAGAGGGGA  
>CD45\_LsgRNA26  
CTCTACGCAAAGCACGGCCTGGGGTGGTGT  
>CD45\_LsgRNA27  
TTATACTATTGTCTGTGCGCCGGGAGGTTT  
>CD45\_LsgRNA28  
GCAGACTGTTCTGGCTGAATTCAGGTAT  
>CD45\_LsgRNA29  
AACCAGAAATGATGATTGCTGCTCAGGGGC  
>CD45\_LsgRNA30  
AGAGAGAAATTGACATTCACCTGGTGGTAC  
>CD45\_LsgRNA31  
CTGTAGAACAAGTGCGCAGAATACTGGCCA  
>CD45\_LsgRNA32  
CCAAAAGACCTGGTGTCTATGATTCAGGACC  
>CD45\_LsgRNA33  
TGACAGAGATGGATCCCAGCAGACAGGGTT  
>CD45\_LsgRNA34  
TCATAGAGGAACCTGGTATTGCTCCTGGTGA  
>CD45\_LsgRNA35  
CTCCAGAGGGGAGGGGTCACTGGGTGGATC  
>CD45\_LsgRNA36  
TGACAGAGTTAGTGAATGGAGACCAGGTTT  
>CD45\_LsgRNA37  
TTACAGATGATGAAAAGCAGCTGATGGATG  
>CD45\_LsgRNA38  
G TTCAGCTTCTGAATGATGTAATCAGGACA  
>CD45\_LsgRNA39  
ACCCAGGAAATACATTGCTGCACAAGGTAA  
>CD45\_LsgRNA40  
ATCTAGGAAGTCTGTGCTCAGTACTGGGGC

>CD45\_LsgRNA41  
TTTGAGGAGCAGGTGAGGGTCTTCAGGAAC

>CD45\_LsgRNA42  
TCACAGGGAAGAATGTCAACATAACGGTTT

>CD45\_LsgRNA43  
CAGAAATCATCAACTGTCTCATCCCGGGGC

>CD45\_LsgRNA44  
TAAAAGTCTGATTACTAGATTCATAGGTGT

>CD45\_LsgRNA45  
ACAGAGTGCCACTTAAGCATGAACTGGAGA

>CD45\_LsgRNA46  
CAAAAGTTCGGAGAGTGTAGGCTGAGGCTC

>CD45\_LsgRNA47  
CAGGAGTTGGAGGACACAGCACATTGGAAA

>CD45\_LsgRNA48  
TGTTATAAATGTGCAGACAGATTTGGGGAG

>CD45\_LsgRNA49  
GCTAATACTTCAATTTGTTTGGAGTGGAAA

>CD45\_LsgRNA50  
CCCCATCAGCTTCCTAACCTGCAGTGGACG

>CD45\_LsgRNA51  
CTGAATCATAGACACCAGGTCTTTGGGTTC

>CD45\_LsgRNA52  
CTTCATCCCTTCTGGGGAAGCCTTGGGAAG

>CD45\_LsgRNA53  
GCTCATCTCCAGTTCATGCTTAAGTGGCAC

>CD45\_LsgRNA54  
TATGATCTGCGCAAGAAAAGATCCAGGTAA

>CD45\_LsgRNA55  
GTTGATGACTTCTGGAGGATGATCTGGGAG

>CD45\_LsgRNA56  
CGGGATGAGACAGTTGATGACTTCTGGAGG

>CD45\_LsgRNA57  
GTCAATGGGAAGATTCAAAGAAATGGGACT

>CD45\_LsgRNA58  
TGTCATGGTCACACGATGTGAAGAAGGAAA

>CD45\_LsgRNA59  
GTCTATGGTTATGTTGTCAAGCTAAGGCGA

>CD45\_LsgRNA60  
AGTAATGTTCCCAAACATGGCAGCTGGAAA

>CD45\_LsgRNA61  
TGTGATGTTGACAGAGTTAGTGAATGGAGA

>CD45\_LsgRNA62  
ATACATTACTTACATCAATGTAGCTGGCAT

>CD45\_LsgRNA63  
TGGTATTCAGCCTCCAGAGGGGAGGGGTCA  
>CD45\_LsgRNA64  
TTTTATTCTGATTGTGGGGCTTTCGGGCAT  
>CD45\_LsgRNA65  
CATACAAAAGGAAGATTGCTGATGAGGGCA  
>CD45\_LsgRNA66  
GTGACAAAGACTTCTGTGTCCAGAAGGGCA  
>CD45\_LsgRNA67  
TGAACAACAGGAACTCGTTGAAAGGGGTGA  
>CD45\_LsgRNA68  
CCCACAAC TAGGCTTAGGCGTTTCTGGAAC  
>CD45\_LsgRNA69  
GCTGCAAGAAAAACGTTAGTCTCTTGGCCT  
>CD45\_LsgRNA70  
TGGCCAAGCATGGAGGAAGGCACTCGGGCT  
>CD45\_LsgRNA71  
GTTTCAAGCTTTCACCTCAAACTGGTCA  
>CD45\_LsgRNA72  
AAGGCACAGAACAACCCTGTCTGCTGGGAT  
>CD45\_LsgRNA73  
AATTCACAGTAATGTTCCCAAACATGGCAG  
>CD45\_LsgRNA74  
AATTCACCAGCTGGCCAGACCATGGGGTTC  
>CD45\_LsgRNA75  
GTCACACGATGTGAAGAAGGAAACAGGGTA  
>CD45\_LsgRNA76  
TCTCCAGATATGACCATGGGTTTGTGGCTC  
>CD45\_LsgRNA77  
TTCACAGCAATTTAGATGAACAACAGGAAC  
>CD45\_LsgRNA78  
CACCCAGTGACCCCTCCCCTCTGGAGGCTG  
>CD45\_LsgRNA79  
CATTCATACCTGAAAGATGTCAGTTGGACA  
>CD45\_LsgRNA80  
CATGCATCCATCCTCGTCCACTGCAGGTTA  
>CD45\_LsgRNA81  
ACTTCATCCCTTCTGGGGAAGCCTTGGGAA  
>CD45\_LsgRNA82  
CCTACATTGGAATTGATGCCATGCTGGAAG  
>CD45\_LsgRNA83  
TCCTCATTTCCACACTTAGCATTTTGGACA  
>CD45\_LsgRNA84  
TATTCCACTAAAGCCTGATGAATCAGGATA

>CD45\_LsgRNA85  
ACATCCACTTTGCCCTCTGCTTCCAGGCCT  
>CD45\_LsgRNA86  
TCTTCCCATTTGACATAGGCAAGTAGGGACA  
>CD45\_LsgRNA87  
TCTTCCCCTTTCCATGTGGTACACTGGTAC  
>CD45\_LsgRNA88  
GTGTCCCTACTTGCCTATGTCAATGGGAAG  
>CD45\_LsgRNA89  
CCTCCCCTCTGGAGGCTGAATACCAGGTAG  
>CD45\_LsgRNA90  
AGGACCTCAAACAGAAGCTTCCCAAGGCTT  
>CD45\_LsgRNA91  
ATATCCTGATTCATCAGGCTTTAGTGAAT  
>CD45\_LsgRNA92  
GAAGCCTTGGGAAGCTTCTGTTTGAGGTCC  
>CD45\_LsgRNA93  
CCGTGGAAGTTTGAGGAGCAGGTGAGGGTC  
>CD45\_LsgRNA94  
AGCCCGAGTGCCTTCCTCCATGCTTGGCCA  
>CD45\_LsgRNA95  
CTGGCGATGATGTCATAGAGGAACTGGTAT  
>CD45\_LsgRNA96  
AGTGCGCAGAATACTGGCCAAGCATGGAGG  
>CD45\_LsgRNA97  
TCTGCTACACATGTGTAATTTGTTTGGGCA  
>CD45\_LsgRNA98  
TCAGCTCAAAAGTTCGGAGAGTGTAGGCTG  
>CD45\_LsgRNA99  
GTGACTCATATCCAATTCACCAGCTGGCCA  
>CD45\_LsgRNA100  
CAGCCTCCAGAGGGGAGGGGTCACTGGGTG  
>CD45\_LsgRNA101  
AAGTCTCTACGCAAAGCACGGCCTGGGGTG  
>CD45\_LsgRNA102  
GGATCTCTCTTCTTCATGTTGTGTAGGCAT  
>CD45\_LsgRNA103  
CATGCTGGAAGGCCTGGAAGCAGAGGGCAA  
>CD45\_LsgRNA104  
TACACTGGTACTGGTACACAGTTCTGGGCT  
>CD45\_LsgRNA105  
CTACCTGGTATTCAGCCTCCAGAGGGGAGG  
>CD45\_LsgRNA106  
TCAACTGTCTCATCCCGGGGCCCTAGGAGT



>CD45\_LsgRNA107  
TGTTCTGTGCCTTGTTCAATCTCTTGAAA  
>CD45\_LsgRNA108  
TTTTCTTAGAGACTTCCTTCATACAGGAGT  
>CD45\_LsgRNA109  
GAAGCTTCCCAAGGCTTCCCCAGAAGGGAT  
>CD45\_LsgRNA110  
GCAACTTCTTCAGTGGTCCCATTGTGGTGC  
>CD45\_LsgRNA111  
TCCAGAAACGCCTAAGCCTAGTTGTGGGGA  
>CD45\_LsgRNA112  
ACCAGAAATGATGATTGCTGCTCAGGGGCC  
>CD45\_LsgRNA113  
CTAGGAAGTCTGTGCTCAGTACTGGGGCGA  
>CD45\_LsgRNA114  
CGTCGAAGTTTGAGGAGCAGGTGAGGGTCT  
>CD45\_LsgRNA115  
TCTGGACACAGAAGTCTTTGTACAGGTAA  
>CD45\_LsgRNA116  
TAGGGACACTTCATAGTATTTATAAGGTTT  
>CD45\_LsgRNA117  
AGCAGACTTATGGAGACATGGAAGTGGAGA  
>CD45\_LsgRNA118  
TAGAGACTTCCTTCATACAGGAGTTGGAGG  
>CD45\_LsgRNA119  
TTTTGAGCTGAGACATTCCAAGGTAGGTAA  
>CD45\_LsgRNA120  
TCTGGAGGATGATCTGGGAGCAAAAGGCCA  
>CD45\_LsgRNA121  
AGCAGAGGGCAAAGTGGATGTCTATGGTTA  
>CD45\_LsgRNA122  
CAAAGATGTCCAAAATGCTAAGTGTGAAA  
>CD45\_LsgRNA123  
AGATGCAGACTCAGGTTTAGATACAGGCTC  
>CD45\_LsgRNA124  
AGCTGCCTGCAGAACCCAAAGACCTGGTGT  
>CD45\_LsgRNA125  
CCATGCTGGAAGGCCTGGAAGCAGAGGGCA  
>CD45\_LsgRNA126  
TCTAGGAAGTCTGTGCTCAGTACTGGGGCG  
>CD45\_LsgRNA127  
CATTGGAATTGATGCCATGCTGGAAGGCCT  
>CD45\_LsgRNA128  
CAAAGGATGCATTAATGTATTTGCTGGTTT

>CD45\_LsgRNA129  
TTCTGGCCTTTGGATTTGCCCTTCTGGACA  
>CD45\_LsgRNA130  
CTGGGGCGAAGGAAAGCAGACTTATGGAGA  
>CD45\_LsgRNA131  
AAAAGGCTAATACTTCAATTTGTTTGGAGT  
>CD45\_LsgRNA132  
GTGGGGCTTTCGGGCATCTTTGATGGGAAA  
>CD45\_LsgRNA133  
TGTTGGGCGTACAGGTACCTACATTGGAAT  
>CD45\_LsgRNA134  
TGTGGGGCTTTCGGGCATCTTTGATGGGAA  
>CD45\_LsgRNA135  
CCATGGGTTTGTGGCTCAAACCTTCTGGCCT  
>CD45\_LsgRNA136  
ATGTGGTCCTCCTTATGAAACTAATGGCCC  
>CD45\_LsgRNA137  
TTGAGGTCCTGAATCATAGACACCAGGTCT  
>CD45\_LsgRNA138  
CCATGGTCTGGCCAGCTGGTGAATTGGATA  
>CD45\_LsgRNA139  
CAATGTAGCTGGCATTATGTAGGTGGACC  
>CD45\_LsgRNA140  
CCTGGTATTCAGCCTCCAGAGGGGAGGGGT  
>CD45\_LsgRNA141  
AGAAGTCATCAACTGTCTCATCCCGGGGCC  
>CD45\_LsgRNA142  
CTGTGTCCAGAAGGGCAAATCCAAAGGCCA  
>CD45\_LsgRNA143  
AGTGGTCCCATTTGTGGTGCACCTGCAGGTAA  
>CD45\_LsgRNA144  
CTGTGTCCTCCAACCTCCTGTATGAAGGAAG  
>CD45\_LsgRNA145  
GCTTGTGATACTTCATCCCTTCTGGGGAAG  
>CD45\_LsgRNA146  
CCGTGTGGAACCTCTCTGAAATAAATGGAGA  
>CD45\_LsgRNA147  
GAGTGTGGGTACCTACCATCACAAAGGATG  
>CD45\_LsgRNA148  
GTTTGTTCCTTAGTGCTGGTGTGGGCGT  
>CD45\_LsgRNA149  
ATGCTAAAGCACTGATTATATTCCTGGTGT  
>CD45\_LsgRNA150  
GTGGTAAAGTCTCTACGCAAAGCACGGCCT

>CD45\_LsgRNA151  
GCATTAACTCTCCGTCTCGAAGTTTGAGGAGC  
>CD45\_LsgRNA152  
CTGCTACACATGTGTAATTTGTTTGGGCAC  
>CD45\_LsgRNA153  
CCAGTACCAGTGTACCACATGGAAAGGGGA  
>CD45\_LsgRNA154  
TCTTTACCTGCAGTGCACCACAATGGGACC  
>CD45\_LsgRNA155  
AGAATACTGGCCAAGCATGGAGGAAGGCAC  
>CD45\_LsgRNA156  
TGAGTAGAAAAAAGAAAAAGCAACTGGAAG  
>CD45\_LsgRNA157  
ATGTTATAAATGTGCAGACAGATTTGGGGA  
>CD45\_LsgRNA158  
CATTTATACTATTGTCTGTCTGGCCGGGAGG  
>CD45\_LsgRNA159  
TTCATATGTACTCCACTGTGAGCCAGGTAC  
>CD45\_LsgRNA160  
CTGGTATTCAGCCTCCAGAGGGGAGGGGTC  
>CD45\_LsgRNA161  
TTTTTATTCTGATTGTGGGGCTTTCGGGCA  
>CD45\_LsgRNA162  
CACCTCAAACTGGTCACATTATTAGGCAA  
>CD45\_LsgRNA163  
AAGGTCAATGGAATGAAAACCTCCCGGCCG  
>CD45\_LsgRNA164  
GATGTCACAATAATCAGAAACACCAGGAAT  
>CD45\_LsgRNA165  
CAATTCACCAGCTGGCCAGACCATGGGGTT  
>CD45\_LsgRNA166  
CACTTCACCTCGGATTGCAGAGGAAGGAGC  
>CD45\_LsgRNA167  
AGACTCAGTTTTAGATACAGGCTCAGGCCA  
>CD45\_LsgRNA168  
AGCCTCCAGAGGGGAGGGGTCACTGGGTGG  
>CD45\_LsgRNA169  
ATCTTCCCATTGACATAGGCAAGTAGGGAC  
>CD45\_LsgRNA170  
AGTGTCCCTACTTGCCTATGTCAATGGGAA  
>CD45\_LsgRNA171  
ACTCTCCGTCTCGAAGTTTGAGGAGCAGGTGA  
>CD45\_LsgRNA172  
AGTCTCTACGCAAAGCACGGCCTGGGGTGG

>CD45\_LsgRNA173  
AAAGTCTCTACGCAAAGCACGGCCTGGGGT  
>CD45\_LsgRNA174  
ACTCTCTGAAATAAATGGAGATGCAGGGTC  
>CD45\_LsgRNA175  
ATCATCTGAAGACTCATCTGATTCAGGCTC  
>CD45\_LsgRNA176  
CACTTCTGACTACCAAATGTAAAAGGTTT  
>CD45\_LsgRNA177  
AGGGTCTTCAGGAACCCCATGGTCTGGCCA  
>CD45\_LsgRNA178  
ATGATGAAAAGCAGCTGATGGATGTGGAGC  
>CD45\_LsgRNA179  
TACATGACTGCACACCAAAGAAAAGGCTA  
>CD45\_LsgRNA180  
TTGATGACTTCTGGAGGATGATCTGGGAGC  
>CD45\_LsgRNA181  
CCCCTGAGCAGCAATCATCATTTCTGGTTT  
>CD45\_LsgRNA182  
TTGCTGATGAGGGCAGACTGTTCTGGCTG  
>CD45\_LsgRNA183  
GAATTGATGCCATGCTGGAAGGCCTGGAAG  
>CD45\_LsgRNA184  
TAGATGCTGGCGATGATGTCATAGAGGAAC  
>CD45\_LsgRNA185  
CCTCTGCTTCCAGGCCTTCCAGCATGGCAT  
>CD45\_LsgRNA186  
TTTGTGGCTCAAACCTTCTGGCCTTTGGATT  
>CD45\_LsgRNA187  
TCCATGGGGTTTAGATGCAGACTCAGGTTT  
>CD45\_LsgRNA188  
ACACTGGTACTGGTACACAGTTCTGGGCTC  
>CD45\_LsgRNA189  
ATGATGTAATCAGGACATCGTTTGTGGTCA  
>CD45\_LsgRNA190  
CATGTGTAATTTGTTTGGGCACGAAGGTTG  
>CD45\_LsgRNA191  
TGCTTGTGATACTTCATCCCTTCTGGGGAA  
>CD45\_LsgRNA192  
ACCTTGTGCAGCAATGTATTTCTGGGTTC  
>CD45\_LsgRNA193  
AGTCTGTGCTCAGTACTGGGGCGAAGGAAA  
>CD45\_LsgRNA194  
TGTTTGTTCCTTAGTGCTGGTGTGGGCG

>CD45\_LsgRNA195  
 GGTTTTAGGGCCATTAGTTTCATAAGGAGG  
 >CD45\_LsgRNA196  
 GGCTTTAGTGGGAATACAATCAGTTTGGAGA  
 >CD45\_LsgRNA197  
 ACATTTATACTATTGTCTGTCTGGCCGGGAG  
 >CD45\_LsgRNA198  
 TGTTTTATGCTATAAGAACAATTCAGGTAA  
 >CD45\_LsgRNA199  
 ACTATTCAACTGACTATGAGTTTCTGGTAA  
 >CD45\_LsgRNA200  
 GGTTTTCATTCATTGACCTTGTCCGGACC  
 >CD45\_LsgRNA201  
 AAGCTTCCAAGGCTTCCCCAGAAGGGATG  
 >CD45\_LsgRNA202  
 CAGCTTCCTAACCTGCAGTGGACGAGGATG  
 >CD45\_LsgRNA203  
 AGACTTCCTTCATACAGGAGTTGGAGGACA  
 >CD45\_LsgRNA204  
 TTCTTTGAATCTTCCCATTGACATAGGCAA  
 >CD45\_LsgRNA205  
 AAGGTTGTCCAAGTACATCTTTCAGGTAT  
 >CD45\_LsgRNA206  
 ATGCTTGTGATACTTCATCCCTTCTGGGGA  
 >CD45\_LsgRNA207  
 TACCTTGTGCAGCAATGTATTTCTGGGTT  
 >CD45\_LsgRNA208  
 AGATTTTATACAAAACAACAAGCAAGGCTA  
 >CD45\_LsgRNA209  
 CTCTTTTCACAATGGAGTGTACGAGGGAGA  
 >CD45\_LsgRNA210  
 TATGTTTCCAACAAAATGTCAGAATGGATT

(33)  $S_{16}^-$ : 49 low on-target activity sgRNAs targeting THY1

>THY1\_LsgRNA1  
 CAATAAAAGTATCAGTGTGTATAGAGGTGA  
 >THY1\_LsgRNA2  
 CACAAAAGTAGTCGCCCTCATCCTTGGTGG  
 >THY1\_LsgRNA3  
 AGAGAAGAGGAAGCACGTGCTCTCAGGCAC  
 >THY1\_LsgRNA4  
 ATCCACAGACAAGCTGGTCAAGTGTGGCGG  
 >THY1\_LsgRNA5  
 AAGCACGTGCTCTCAGGCACCCCTTGGGATA

>THY1\_LsgRNA6  
CGGTACGTGTGCTCGGGTATCCCAAGGGTG  
>THY1\_LsgRNA7  
CATCAGCGTCGCTCTCCTGCTCTCAGGTAC  
>THY1\_LsgRNA8  
GAGCAGGAGAGCGACGCTGATGGCTGGGTT  
>THY1\_LsgRNA9  
ATCCAGGATGTGTTCTGAACCAGCAGGCTT  
>THY1\_LsgRNA10  
GGCTAGGGTAAGGACCTTGATATAGGGCTG  
>THY1\_LsgRNA11  
ACTCATGCTGGATGGAGTTATCCTTGGTGT  
>THY1\_LsgRNA12  
TAGCCAACTTCACCACCAAGGATGAGGGCG  
>THY1\_LsgRNA13  
GGTTCACCAGGCAGGCTGTCAGGCTGGTCA  
>THY1\_LsgRNA14  
GAAGCACGTGCTCTCAGGCACCCTTGGGAT  
>THY1\_LsgRNA15  
AGAGCACGTGCTTCCTCTTCTCTCGGGTCA  
>THY1\_LsgRNA16  
AAGGCACTGCTGTGCCAGTCTTGCAGGTGT  
>THY1\_LsgRNA17  
GGGTCAGGCTGAACTCATGCTGGATGGAGT  
>THY1\_LsgRNA18  
ACTGCCGCCATGAGAATAACACCAAGGATA  
>THY1\_LsgRNA19  
CTGCCCTCGGGACACCTGCAAGACTGGCAC  
>THY1\_LsgRNA20  
TCATCCTTGGTGGTGAAGTTGGCTAGGGTA  
>THY1\_LsgRNA21  
GACGCGGGAGCGGTACGTGTGCTCGGGTAT  
>THY1\_LsgRNA22  
CGCCCTCATCCTTGGTGGTGAAGTTGGCTA  
>THY1\_LsgRNA23  
CCCTCTCCAACCAGCCCTATATCAAGGTCC  
>THY1\_LsgRNA24  
GACCCTTGCCCAGTACCTGAGAGCAGGAGA  
>THY1\_LsgRNA25  
AGGTGACCAGCCTGACAGCCTGCCTGGTGA  
>THY1\_LsgRNA26  
TAAGGACCTTGATATAGGGCTGGTTGGAGA  
>THY1\_LsgRNA27  
GAGCGACGCTGATGGCTGGGTTTCATGGTGC

>THY1\_LsgRNA28  
CTGAGAGCAGGAGAGCGACGCTGATGGCTG  
>THY1\_LsgRNA29  
GAGAGCACGTGCTTCCTCTTCTCTCGGGTC  
>THY1\_LsgRNA30  
TCTTGCAGGTGTCCCGAGGGCAGAAGGTGA  
>THY1\_LsgRNA31  
TGACGCGGGAGCGGTACGTGTGCTCGGGTA  
>THY1\_LsgRNA32  
TCAGGCTGGTCACCTTCTGCCCTCGGGACA  
>THY1\_LsgRNA33  
TAGGGCTGGTTGGAGAGGGTGACGCGGGAG  
>THY1\_LsgRNA34  
ACGTGCTTCCTCTTCTCTCGGGTCAGGCTG  
>THY1\_LsgRNA35  
AGCAGGAGAGCGACGCTGATGGCTGGGTTC  
>THY1\_LsgRNA36  
TGGCGGCAGTCCAGGCGAAGGTTTTGGTTC  
>THY1\_LsgRNA37  
GTCAGGCTGGTCACCTTCTGCCCTCGGGAC  
>THY1\_LsgRNA38  
GCCTGGTGAACCAAAACCTTCGCCTGGACT  
>THY1\_LsgRNA39  
TTTTGGTTCACCAGGCAGGCTGTCAGGCTG  
>THY1\_LsgRNA40  
AAAAGTAGTCGCCCTCATCCTTGGTGGTGA  
>THY1\_LsgRNA41  
TCAAGTGTGGCGGCATAAGCCTGCTGGTTC  
>THY1\_LsgRNA42  
AGGGTAAGGACCTTGATATAGGGCTGGTTG  
>THY1\_LsgRNA43  
TGGCTAGGGTAAGGACCTTGATATAGGGCT  
>THY1\_LsgRNA44  
GAGTTATCCTTGGTGTATTCTCATGGCGG  
>THY1\_LsgRNA45  
GTGTTATTCTCATGGCGGCAGTCCAGGCGA  
>THY1\_LsgRNA46  
GAGTTCAGCCTGACCCGAGAGAAGAGGAAG  
>THY1\_LsgRNA47  
ACCTTGATATAGGGCTGGTTGGAGAGGGTG  
>THY1\_LsgRNA48  
TGGTTGGAGAGGGTGACGCGGGAGCGGTAC  
>THY1\_LsgRNA49  
CCCCTTCTCTATCCACAGACAAGCTGGTCA

(34) S<sub>17</sub>: 110 low on-target activity sgRNAs targeting CD43

>CD43\_LsgRNA1  
ACAGAAACTGATGGGCTGGCATTCTGGGCT  
>CD43\_LsgRNA2  
CCCCAAAGAGGAGGAGAAGGTGCAAGGCCA  
>CD43\_LsgRNA3  
TGGAAACTACTGAATTGTCTTCTTTGGAGA  
>CD43\_LsgRNA4  
CAGAAACTGATGGGCTGGCATTCTGGGCTT  
>CD43\_LsgRNA5  
CTGGAAGCAGTGCTGATGTCTTGCTGGAAA  
>CD43\_LsgRNA6  
CTCGAAGGAGACCATCAGCCCCCTGGGGGCA  
>CD43\_LsgRNA7  
GACAACAAGCTCTAACGAGACCAGTGGACC  
>CD43\_LsgRNA8  
TGTCACAGGATTGGCTGCAGTGACAGGAGG  
>CD43\_LsgRNA9  
TACAACAGTAAGCTCCAAGACCAGTGGTCC  
>CD43\_LsgRNA10  
TGTCACCACAGCTACTGGGTCTCTGGGGCC  
>CD43\_LsgRNA11  
AACCACCACCAAGGCAATAAGCATGGGCAC  
>CD43\_LsgRNA12  
AGAGACCCAGTAGCTGTGGTGACAGGGGGA  
>CD43\_LsgRNA13  
CTGTACCTGAGCCTACTGCCTCTCAGGAAG  
>CD43\_LsgRNA14  
GGTGACCTGGTGGTTATGGGATCTTGGGTA  
>CD43\_LsgRNA15  
CCCACTGGA ACTCTCCACAGAACTGGTTG  
>CD43\_LsgRNA16  
AGGTACTTGGAGCTGTGATATGTGGGGTAG  
>CD43\_LsgRNA17  
GCCAAGAATCAAGTGGCATGTTACTGGTGC  
>CD43\_LsgRNA18  
CGTTAGAGCTTGTGTGTCACAGTGGTGGGGG  
>CD43\_LsgRNA19  
CGCCAGAGGCAAAAGCGGAGGACTGGGGCC  
>CD43\_LsgRNA20  
TTAGAGCTTGTGTGTCACAGTGGTGGGGGT  
>CD43\_LsgRNA21  
TCGAAGGAGACCATCAGCCCCCTGGGGGCAG



>CD43\_LsgRNA22  
TGAGAGGCAGTAGGCTCAGGTACAGGGGTG  
>CD43\_LsgRNA23  
GCTCAGGTACAGGGGTGCTCATGCTGGCAC  
>CD43\_LsgRNA24  
CTGCAGGTCCGTCTGTACAGGATTGGCTG  
>CD43\_LsgRNA25  
AGGGAGTCCATGCATCTCACTCGAGGGCCC  
>CD43\_LsgRNA26  
TAACATGCCACTTGATTCTTGGCTTGGTGA  
>CD43\_LsgRNA27  
CAGCATGCCCCAAAGAGGAGGAGAAGGTGC  
>CD43\_LsgRNA28  
GCCACAACAGCAGTAGCGCCACGAGGGCCA  
>CD43\_LsgRNA29  
TTGTCACAGTGGTGGGGGTGCACTGGTTC  
>CD43\_LsgRNA30  
CTGTCACCACAGCTACTGGGTCTCTGGGGC  
>CD43\_LsgRNA31  
AAACCACCACCAAGGCAATAAGCATGGGCA  
>CD43\_LsgRNA32  
GCGCCAGAGGCAAAAGCGGAGGACTGGGGC  
>CD43\_LsgRNA33  
AGCCCATCAGTTTCTGTGGGGTCAGGGACA  
>CD43\_LsgRNA34  
TGCCCATGCTTATTGCCTTGGTGGTGGTTT  
>CD43\_LsgRNA35  
GTTTCCAAGGGGGTCAAAGAAACTGGGATT  
>CD43\_LsgRNA36  
AGACCCAGTAGCTGTGGTGACAGGGGGACC  
>CD43\_LsgRNA37  
CAGCCCATCAGTTTCTGTGGGGTCAGGGAC  
>CD43\_LsgRNA38  
GAGACCCAGTAGCTGTGGTGACAGGGGGAC  
>CD43\_LsgRNA39  
CAATCCCAGTTTCTTTGACCCCTTGAAAA  
>CD43\_LsgRNA40  
CTGACCCACAGAACTGATGGGCTGGCAT  
>CD43\_LsgRNA41  
AGGGCCCCAGAGACCCAGTAGCTGTGGTGA  
>CD43\_LsgRNA42  
TGGTCCCCCTGTCACCACAGCTACTGGGTC  
>CD43\_LsgRNA43  
GGTCCCCCTGTCACCACAGCTACTGGGTCT

>CD43\_LsgRNA44  
TTCTCCTCCTCTTTGGGGCATGCTGGGTCC  
>CD43\_LsgRNA45  
TGTCCCTGACCCACAGAACTGATGGGCT  
>CD43\_LsgRNA46  
GTGACCTGGTGGTTATGGGATCTTGGGTAG  
>CD43\_LsgRNA47  
GACTCGAAGGAGACCATCAGCCCCTGGGGG  
>CD43\_LsgRNA48  
CTAACGAGACCAGTGGACCCTCTGTGGCTA  
>CD43\_LsgRNA49  
GTGGCGAGCCAGACAGTCTGCAGAGGACG  
>CD43\_LsgRNA50  
AACTCTCCACAGAACTGGTTGCTGTGGTAG  
>CD43\_LsgRNA51  
GTCACTGGCTACATTTGATGGTTCTGGAAG  
>CD43\_LsgRNA52  
TTGGCTTGGTGACCTGGTGGTTATGGGATC  
>CD43\_LsgRNA53  
AGAGCTTGTGTGCACAGTGGTGGGGGGTGC  
>CD43\_LsgRNA54  
TCCTCTTTGGGGCATGCTGGGTCCAGGTGG  
>CD43\_LsgRNA55  
CACAGAACTGGTTGCTGTGGTAGCAGGGAG  
>CD43\_LsgRNA56  
ACTCGAAGGAGACCATCAGCCCCTGGGGGC  
>CD43\_LsgRNA57  
TGGTGACAGGGGGACCACTGGTCTTGGAGC  
>CD43\_LsgRNA58  
CAGAGACCCAGTAGCTGTGGTGACAGGGGG  
>CD43\_LsgRNA59  
TGCAGACTGTCTGGGCTCGCCACCTGGACC  
>CD43\_LsgRNA60  
TGTGGAGAGTTCCAGTGTGGCCCGTGGCAC  
>CD43\_LsgRNA61  
GTTAGAGCTTGTGTGCACAGTGGTGGGGGG  
>CD43\_LsgRNA62  
CTGAGAGGCAGTAGGCTCAGGTACAGGGGT  
>CD43\_LsgRNA63  
CCACGAGGGCCAAAACCACCACCAAGGCAA  
>CD43\_LsgRNA64  
CAGGGAGTCCATGCATCTCACTCGAGGGCC  
>CD43\_LsgRNA65  
TGCAGCATCTACATCTATCTCTAAAGGAAC

>CD43\_LsgRNA66  
GAATGCCAGCCCATCAGTTTCTGTGGGGTC  
>CD43\_LsgRNA67  
TGGTGCCCATGCTTATTGCCTTGGTGGTGG  
>CD43\_LsgRNA68  
TTCTGCTGGAAACTGAGGTGCCACGGGGCCA  
>CD43\_LsgRNA69  
TGGAGCTTACTGTTGTAGCCACAGAGGGTC  
>CD43\_LsgRNA70  
CTTGGCTTGGTGACCTGGTGGTTATGGGAT  
>CD43\_LsgRNA71  
TAGAGCTTGTGTGCACAGTGGTGGGGGGTG  
>CD43\_LsgRNA72  
CACAGGATTGGCTGCAGTGACAGGAGGGTC  
>CD43\_LsgRNA73  
ACTGGGATTGTGGTCTGCCCCAGGGGCTG  
>CD43\_LsgRNA74  
GAGAGGCAGTAGGCTCAGGTACAGGGGTGC  
>CD43\_LsgRNA75  
TTGTGGCGCCAGAGGCAAAAGCGGAGGACT  
>CD43\_LsgRNA76  
TTATGGGATCTTGGGTAGACGTCGTGGATG  
>CD43\_LsgRNA77  
AACTGGGATTGTGGTCTGCCCCAGGGGCT  
>CD43\_LsgRNA78  
AGGAGGGTCACTGGCTACATTTGATGGTTC  
>CD43\_LsgRNA79  
AGGGGGTCAAAGAAACTGGGATTGTGGTCT  
>CD43\_LsgRNA80  
TACTGGTGCCCATGCTTATTGCCTTGGTGG  
>CD43\_LsgRNA81  
ACCAGTAACATGCCACTTGATTCTTGGCTT  
>CD43\_LsgRNA82  
TGGGGTCAGGGACAGTGGACTCGAAGGAGA  
>CD43\_LsgRNA83  
CATCGTCGTCCTCTGCAGACTGTCTGGGCT  
>CD43\_LsgRNA84  
TCTCGTTAGAGCTTGTGTGCACAGTGGTGG  
>CD43\_LsgRNA85  
CTGCTACCACAGCAACCAGTTCTGTGGAGA  
>CD43\_LsgRNA86  
GCGCTACTGCTGTTGTGGCGCCAGAGGCAA  
>CD43\_LsgRNA87  
GAGGTACTTGGAGCTGTGATATGTGGGGTA

>CD43\_LsgRNA88  
TGCTTATTGCCTTGGTGGTGGTTTTGGCCC  
>CD43\_LsgRNA89  
CAGGTCACCAAGCCAAGAATCAAGTGGCAT  
>CD43\_LsgRNA90  
AGTTTCCAAGGGGGTCAAAGAAACTGGGAT  
>CD43\_LsgRNA91  
CTTCTCCTCCTCTTTGGGGCATGCTGGGTC  
>CD43\_LsgRNA92  
AACTTCCTGAGAGGCAGTAGGCTCAGGTAC  
>CD43\_LsgRNA93  
ATCGTCGTCCTCTGCAGACTGTCTGGGCTC  
>CD43\_LsgRNA94  
GCCCTCGTGGCGCTACTGCTGTTGTGGCGC  
>CD43\_LsgRNA95  
TCCGTCTGTCACAGGATTGGCTGCAGGGAC  
>CD43\_LsgRNA96  
ATTGTCTTCTTTGGAGACTTCTGCTGGTGC  
>CD43\_LsgRNA97  
AAACTGAGGTGCCACGGGCCACACTGGAAC  
>CD43\_LsgRNA98  
CACTTGATTCTTTGGCTTGGTGACCTGGTGG  
>CD43\_LsgRNA99  
GCCTTGCACCTTCTCCTCCTCTTTGGGGCA  
>CD43\_LsgRNA100  
TGGCTGCAGTGACAGGAGGGTCACTGGCTA  
>CD43\_LsgRNA101  
AGAATGCCAGCCCATCAGTTTCTGTGGGGT  
>CD43\_LsgRNA102  
TTTCTGCTGGAACTGAGGTGCCACGGGCC  
>CD43\_LsgRNA103  
AAACTGGGATTGTGGTCTGCCCCAGGGGC  
>CD43\_LsgRNA104  
CTGTTGTAGCCACAGAGGGTCCACTGGTCT  
>CD43\_LsgRNA105  
CTGTTGTGGCGCCAGAGGCAAAAGCGGAGG  
>CD43\_LsgRNA106  
TAGCTGTGGTGACAGGGGGACCACTGGTCT  
>CD43\_LsgRNA107  
GGCATTCTGGGCTTCAGAGGTACTTGGAGC  
>CD43\_LsgRNA108  
CCAGTTCTGTGGAGAGTTCCAGTGTGGCCC  
>CD43\_LsgRNA109  
CAGTTTCTGTGGGGTCAGGGACAGTGGACT

>CD43\_LsgRNA110  
GGCCTTGCACCTTCTCCTCCTCTTTGGGGC
