# Supplementary material for: sgRNA-PSM: Predict sgRNAs On-Target Activity Based on Position-Specific Mismatch
Source: PubMed Central journal article supplement — Mol Ther Nucleic Acids. 2020 Jan 31;20:323–30. doi: 10.1016/j.omtn.2020.01.029 (PMC7083770; doi:10.1016/j.omtn.2020.01.029), 2020-01-31
Supplement: mmc2.pdf [file mmc2.pdf]

# sgRNA-PSM: Predict sgRNAs On-Target Activity Based on Position-Specific Mismatch

Bin Liu,<sup>1,2</sup> Zhihua Luo,<sup>3</sup> and Juan He<sup>4</sup>

<sup>1</sup>School of Computer Science and Technology, Beijing Institute of Technology, Beijing, China; <sup>2</sup>Advanced Research Institute of Multidisciplinary Science, Beijing Institute of Technology, Beijing, China; <sup>3</sup>Affiliated Shenzhen Maternity & Child Healthcare Hospital, Southern Medical University, Shenzhen, Guangdong, China; <sup>4</sup>School of Computer Science and Technology, Harbin Institute of Technology, Shenzhen, Guangdong, China

**As a key technique for the CRISPR-Cas9 system, identification of single-guide RNAs (sgRNAs) on-target activity is critical for both theoretical research (investigation of RNA functions) and real-world applications (genome editing and synthetic biology). Because of its importance, several computational predictors have been proposed to predict sgRNAs on-target activity. All of these methods have clearly contributed to the developments of this very important field. However, they are suffering from certain limitations. We proposed two new methods called “sgRNA-PSM” and “sgRNA-ExPSM” for sgRNAs on-target activity prediction via capturing the long-range sequence information and evolutionary information using a new way to reduce the dimension of the feature vector to avoid the risk of overfitting. Rigorous leave-one-gene-out cross-validation on a benchmark dataset with 11 human genes and 6 mouse genes, as well as an independent dataset, indicated that the two new methods outperformed other competing methods. To make it easier for users to use the proposed sgRNA-PSM predictor, we have established a corresponding web server, which is available at <http://bliulab.net/sgRNA-PSM/>.**

## INTRODUCTION

Three main genome editing tools, including zinc-finger nucleases (ZFNs),<sup>1</sup> transcription activator-like effector nucleases (TALENs),<sup>2</sup> and CRISPR-Cas9 RNA-guided technologies,<sup>3,4</sup> can be used to recognize and cleave specific DNA sequences.<sup>5</sup> Compared with ZFNs and TALENs, CRISPR-Cas9 has been widely applied in various cell types and organisms in recent years. In the type II CRISPR-Cas9 system, single-guide RNA (sgRNA) directs Cas9 protein to the target site to cleave the DNA target sequences, and sgRNA should be designed to have around a 20-nt sequence to be complementary to the guide sequence in the DNA target sequences.<sup>6,7</sup> Rational design of sgRNA is a crucial part for CRISPR-Cas9. Therefore, the prediction of sgRNAs on-target activity is very important for CRISPR-Cas9.

Researchers have proposed several computational methods for sgRNAs on-target activity prediction. Most of them treat the prediction problem of sgRNA as a binary classification task or a regression task, and the computational predictors were constructed based on machine learning algorithms. The differences between these approaches are feature extraction methods and machine learning

techniques, such as gradient boosting regression (GBR),<sup>8</sup> support vector machines (SVMs),<sup>9–18</sup> ensemble classifiers<sup>19–24</sup>, and deep learning,<sup>25–32</sup> among others. As shown in the aforementioned studies,<sup>33,34</sup> discriminative features are critical for constructing the computational predictors. Accordingly, some features have been proposed to capture the characteristics of sgRNAs, for example, because the position of a nucleotide in sgRNA will affect its activity, and thus the position-specific (PS)<sup>35</sup> feature was proposed to incorporate these sequence patterns, which has been used in ge-CRISPR,<sup>36</sup> Azimuth,<sup>37</sup> and CRISPRpred.<sup>38</sup> Kaur et al.<sup>36</sup> proposed an integrated pipeline called ge-CRISPR to predict and analyze the genome editing efficiency of sgRNAs. Azimuth<sup>37</sup> employed GBR to train the model, achieving state-of-the-art performance. CRISPRpred<sup>38</sup> is another efficient predictor, combining the discriminative features selected by random forest (RF)<sup>39</sup> and the SVM regression.

All of the aforementioned predictors have obtained encouraging results and played a role in the development of computational predictors for sgRNAs on-target activity prediction, but they are also suffering from some problems or limitations. Further work is required for the following reasons: (1) these predictors are only able to consider the short-range sequence information of the DNA sequences, otherwise they will cause “high-dimension disaster”;<sup>40,41</sup> and (2) these predictors failed to incorporate the evolutionary information, ignoring information between non-consecutive nucleotides.

In order to solve these aforementioned problems, we proposed a novel feature, PS mismatch (PSM), sharing the advantages of both PS<sup>35</sup> and mismatch features.<sup>41</sup> RNA sequence evolution involves single nucleotides, insertions and deletions of several nucleotides, and other factors. With the long-term accumulation of these changes in evolution, although the similarities between the initial and the final RNA sequences are gradually reduced, these RNA sequences still have many features in common. PSM is such a method for extracting

Received 8 August 2019; accepted 23 January 2020;  
<https://doi.org/10.1016/j.omtn.2020.01.029>

**Correspondence:** Bin Liu, School of Computer Science and Technology, Beijing Institute of Technology, No. 5, South Zhongguancun Street, Haidian District, Beijing 100081, China.

**E-mail:** [bliu@bliulab.net](mailto:bliu@bliulab.net)

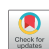

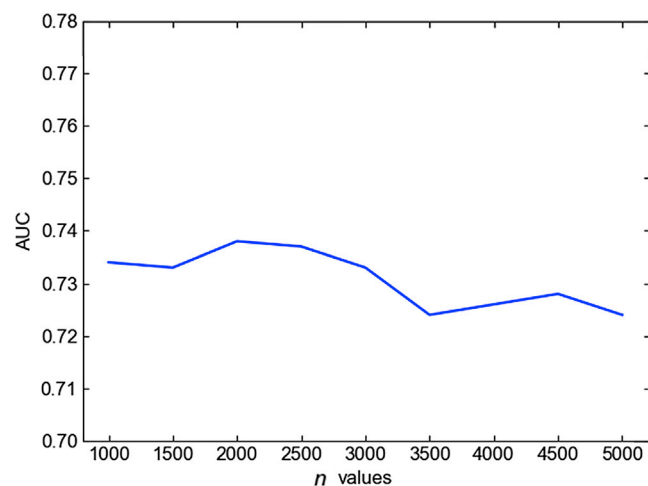

**Figure 1. Graph Showing AUC Scores of the sgRNA-PSM Predictors with Different  $n$  Values, where  $n$  Denotes the Number of Selected Features**

the evolutionary information from RNA sequences by allowing mismatches occurring in  $k$ -mers from specific positions.<sup>41</sup> PSM has been applied to predict sgRNAs on-target activity, and two predictors were established called “sgRNA-PSM” and “sgRNA-ExPSM” (sgRNA-extended PSM). Finally, a corresponding web server has been constructed (<http://bliulab.net/sgRNA-PSM/>).

## RESULTS AND DISCUSSION

### Parameter Optimization

According to Equations 9 and 10, there are two parameters in PSM,  $k$  and  $m$ , and three parameters in the XGBoost algorithm,  $C$ ,  $R$ , and  $F$ . These parameters were optimized according to AUC (area under the curve) by using leave-one-gene-out cross-validation on the benchmark dataset S (cf. Equation 3). In this study, these parameters were optimized in the ranges listed in the following:

$$\begin{cases} 1 \leq k \leq 6, & \text{with step } \Delta k = 1 \\ 0 < m \leq k - 1, & \text{with step } \Delta m = 1 \\ 3 \leq c \leq 10, & \text{with step } \Delta c = 1 \\ 0.05 \leq R \leq 0.1, & \text{with step } \Delta R = 0.05 \\ 100 \leq F \leq 1000, & \text{with step } \Delta F = 100 \end{cases} \quad (\text{Equation 1})$$

The final optimal values of the five parameters (cf. Equation 1) were optimized based on the AUC on the benchmark dataset S (cf. Equation 3), as given by

$$\begin{cases} k = 5, m = 2, c = 3, R = 0.1, F = 800 & \text{for sgRNA - PSM} \\ k = 5, m = 2, c = 3, R = 0.1, F = 800 & \text{for sgRNA - ExPSM} \end{cases} \quad (\text{Equation 2})$$

### Feature Selection and Analysis

In order to remove the redundant features and reduce the dimension of the resulting feature vectors, here we used SelectKBest in scikit-learn<sup>42</sup> to select the top number of features with the highest scores

based on the scoring function  $f_{\text{regression}}$ , which can avoid the over-fitting risk with low computational cost.<sup>43</sup> We investigated the influence of the value  $n$  (number of selected features) in SelectKBest on the predictive performance of sgRNA-PSM, and the results are shown in Figure 1, from which we can see that the values of  $n$  have little impact on the performance, and sgRNA-PSM can achieve the best performance when  $n$  is equal to 2,000.

The importance of each feature can be analyzed based on  $F_{\text{score}}$ . To explore the reason why the proposed sgRNA-PSM predictor works so well, we analyzed the contribution of each feature. Table 1 lists the 10 most important features, from which we can see that (1) the top 9 most important features belong to the features generated in the sequence positions from 23 to 30. In the CRISPR-Cas9 system, the DNA target sequences are composed of two parts:<sup>44</sup> one is the guide sequence, and the other is the protospacer adjacent motif (PAM). The guide sequence is complementary to around a 20-bp sequence in sgRNA, and PAM is the downstream short sequence of the guide sequence<sup>6</sup> and is recognized by the Cas9 protein.<sup>45</sup> In the benchmark dataset S (cf. Equation 3), the guide sequence is in the sequence positions from 5 to 24, and PAM is the short sequence in the sequence positions from 25 to 27.<sup>37</sup> Therefore, the top 9 most important features all cover PAM, indicating that the proposed PSM is able to incorporate this important sequence pattern. (2) PAM is composed of any nucleotide in sequence position 25 followed by GG in positions 26 and 27.<sup>6,37</sup> 7 of the 10 most important features capture this sequence pattern.

### Comparison with Other Methods

The results obtained by sgRNA-PSM and sgRNA-ExPSM on the benchmark dataset S are listed in Table 2, from which we can see that the AUC achieved by sgRNA-PSM was 73.8%. The corresponding AUC achieved by sgRNA-ExPSM was even better, which was 74.4%. This is reasonable because the acid cut position and percent peptide features referred to in Equation 11 are complementary with the PSM features in Equation 9. The PSM feature vector reflects long-range sequence information, while the amino acid cut position and percent peptide are guide-positional features corresponding to the start distance of the protein coding region of the gene where the cleavage site of the sgRNA is positioned.<sup>37</sup>

Then, we made a comparison of the sgRNA-PSM and sgRNA-ExPSM with ge-CRISPR,<sup>36</sup> Azimth,<sup>37</sup> and CRISPRpred.<sup>38</sup> All of these predictors were examined by the leave-one-gene-out cross-validation on the benchmark dataset S (cf. Equation 3). For facilitating comparison, the corresponding results obtained by the ge-CRISPR predictor, the Azimth predictor, and the CRISPRpred predictor are also given in Table 2 and Figure 2. Here, Figure 2 includes the corresponding receiver operating characteristic (ROC) curves showing the performance of the five predictors. A diagonal from the point (0,0) to (1,1) means a random guess. The better performance of the predictor corresponds to a larger AUC.

The following conclusions can be drawn from Table 2 and Figure 2: (1) the AUC score achieved by the proposed sgRNA-PSM predictor is higher than that of ge-CRISPR, and even higher than those of

**Table 1. The 10 Most Important Features in the sgRNA-PSM Predictor**

| No. | PSM Feature <sup>a</sup> | Sequence Position <sup>b</sup> | F_score <sup>c</sup> |
|-----|--------------------------|--------------------------------|----------------------|
| 1   | *G*GG                    | 23–27                          | 185.6                |
| 2   | G*GG*                    | 24–28                          | 185.6                |
| 3   | C*G*G                    | 24–28                          | 136.2                |
| 4   | C**GG                    | 24–28                          | 136.2                |
| 5   | *C*GG                    | 23–27                          | 129.0                |
| 6   | C*GG*                    | 24–28                          | 129.0                |
| 7   | **GGG                    | 24–28                          | 128.0                |
| 8   | *GGG*                    | 25–29                          | 128.0                |
| 9   | GGG**                    | 26–30                          | 128.0                |
| 10  | **TTC                    | 20–24                          | 113.0                |

<sup>a</sup>Parameters were  $k = 5$ ,  $m = 2$ .

<sup>b</sup>The sequence position of mismatches.

<sup>c</sup>Calculated by F regression.

Azimuth and CRISPRpred based on the wet experiment features, such as amino acid cut position and percent peptide. Please note that these two features are not sequence-based features, and they are often unavailable. (2) The sgRNA-ExPSM predictor outperforms the sgRNA-PSM predictor by incorporating the amino acid cut position feature and percent peptide feature.

In addition, the sgRNA-PSM predictor was further compared with Azimuth<sup>37</sup> and DeepCRISPR (pt+aug CNN)<sup>46</sup> on the on-target dataset.<sup>46,47</sup> In order to make a fair comparison, the sgRNA-PSM predictor was trained on the training set of on-target dataset reported in Chuai et al.<sup>46</sup> and tested on the independent test dataset<sup>46</sup> for the hct116, hela, and hl60 cell types. The hek293t dataset reported in Doench et al.<sup>37</sup> is a subset of our benchmark dataset S (cf. Equation 3). Therefore, our method was not tested on the hek293t dataset again. For sgRNA-PSM, SelectKBest with the scoring function chi2 in scikit-learn was used to select 1,100 dimensions of the PSM features and fed into XGBoost for classification. The predictive results of sgRNA-PSM, DeepCRISPR (pt+aug CNN), and Azimuth are shown in Table 3. As shown in this table, our method outperformed Azimuth and DeepCRISPR (pt+aug CNN) on the hct116 and hela cell types, and it is highly comparable to DeepCRISPR (pt+aug CNN) on the hl60 cell type.

To further explore the reasons why our method cannot perform well on the hl60 cell type, we retrained the sgRNA-PSM classifier with each of the three datasets (hct116, hela, and hl60). For each dataset, 20% of the samples were used as the test dataset, which were stratified by labels following Chuai et al.,<sup>46</sup> and the remaining 80% of the samples were used as the training dataset. The results are also listed in Table 3, from which we can see that the sgRNA-PSM trained with the hl60 dataset outperformed the corresponding classifier trained with the training data consisting of all four cell types, and it even outperformed Azimuth. The results are not surprising because the four different cell types have different data distributions. Noise informa-

**Table 2. List of AUC Scores Obtained by Various Methods via the Leave-One-Gene-Out Cross-Validation on the Same Benchmark Dataset S (cf. Equation 3)**

| Methods                  | AUC (%) <sup>a</sup> |
|--------------------------|----------------------|
| Azimuth <sup>b</sup>     | 71.9                 |
| ge-CRISPR <sup>c</sup>   | 71.7                 |
| CRISPRpred <sup>d</sup>  | 71.6                 |
| sgRNA-PSM <sup>e</sup>   | 73.8                 |
| sgRNA-ExPSM <sup>f</sup> | 74.4                 |

<sup>a</sup>AUC means the area under the ROC curve;<sup>56,57</sup> the better predictor corresponds to larger AUC values.

<sup>b</sup>Results obtained by in-house implementation from Doench et al.<sup>37</sup>

<sup>c</sup>Results obtained by in-house implementation from Kaur et al.<sup>36</sup>

<sup>d</sup>Results obtained by in-house implementation from Rahman and Rahman.<sup>38</sup>

<sup>e</sup>For the proposed predictor in this article, see Equations 9 and 10 with  $k = 5$ ,  $m = 2$ ,  $\zeta = 3$ ,  $R = 0.1$ ,  $F = 800$ .

<sup>f</sup>For the proposed predictor in this article, see Equations 10 and 11 with  $k = 5$ ,  $m = 2$ ,  $\zeta = 3$ ,  $R = 0.1$ ,  $F = 800$ .

tion was introduced when combining all four cell types to train a computational predictor. Therefore, the overall performance of sgRNA-PSM is better than that of all of the other competing methods.

### Web Server and User Guide

Providing a user-friendly and freely accessible web server for a new predictor can obviously improve its impact.<sup>48</sup> To make it easier for users to use the proposed predictor, we established the corresponding sgRNA-PSM web server. Because the sgRNA-ExPSM predictor requires two features obtained from wet experiments, which are often unavailable, its corresponding web server is not able to be constructed. The web server has the following functions: (1) it allows users to input sgRNA sequences in reverse-complementary order, and (2) it allows users to input longer sequences (30–1,000 bp). The web server will detect all of the possible sgRNAs and predict their on-target activities. The steps for using the sgRNA-PSM web server are as follows:

Step 1. Click on the website address <http://bliulab.net/sgRNA-PSM/> to open the sgRNA-PSM web server, at which point the homepage of the website will appear as shown in Figure 3. The detailed introduction to the web server can be obtained by clicking on the “Read Me” button.

Step 2. Click on the “Browse” button to upload the input file or type your query DNA sequences in FASTA format.

Step 3. Click on the “Submit” button to get the final predictive results. When inputting the four DNA sequences in the “Example” window, you will see that the first and second are predicted as high on-target activity sgRNAs, while the third is the sequence in reverse-complementary order, which is predicted as low on-target activity sgRNA, and the fourth has four low on-target activity sgRNAs and one high on-target activity sgRNA. These results are consistent with the experimental results. In order to help the users to solve the problems when using the web server, the

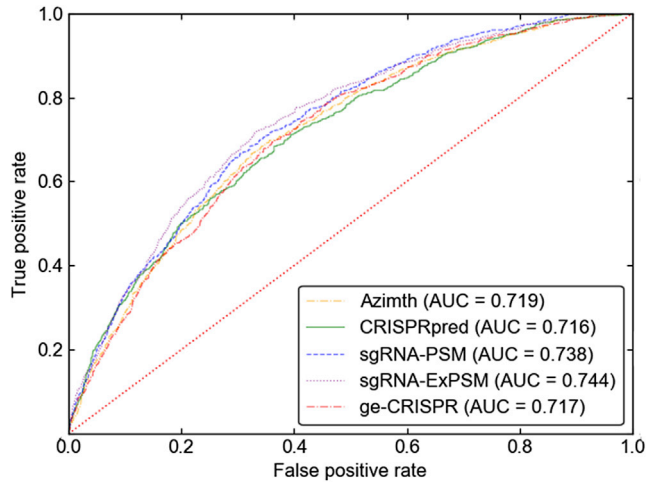

**Figure 2. Graph Showing the Predictive Quality of the Aforementioned Predictors via the ROC Curves**

The corresponding AUC scores are 0.717, 0.716, 0.719, 0.738, and 0.744 for ge-CRISPR, CRISPRpred, Azimuth, sgRNA-PSM, and sgRNA-ExPSM predictors via the leave-one-gene-out cross-validation on the same benchmark dataset  $S$ , respectively.

Frequently Questioned Answers (FQA) are provided by clicking on the FQA button.

## MATERIALS AND METHODS

### Benchmark Datasets

In this study, a widely used benchmark dataset<sup>37</sup> constructed by the FC dataset<sup>35</sup> and the RES dataset<sup>37</sup> was employed to evaluate the performance of different methods. The benchmark dataset consists of 5,310 sequences from 11 human genes (CD33, MED12, NF2, CD13, TADA2B, CUL3, TADA1, HPRT, NF1, CD15, CCDC101) and 6 mouse genes (Cd45, Cd43, Cd28, H2-K, Cd5, Thy1). There are 1,059 high on-target activity sgRNAs and 4,251 low on-target activity sgRNAs. The benchmark dataset  $S$  is as follows:

$$S = S_1 \cup S_2 \cup S_3 \cup \dots \cup S_{16} \cup S_{17} = \bigcup_{i=1}^{17} S_i, \quad (\text{Equation 3})$$

where

$$S_i = S_i^+ \cup S_i^- (i = 1, 2, \dots, 17) \quad (\text{Equation 4})$$

with

$$\frac{|S_1^+|}{|S_1^-|} \approx \frac{|S_2^+|}{|S_2^-|} \approx \frac{|S_3^+|}{|S_3^-|} \approx \dots \approx \frac{|S_{16}^+|}{|S_{16}^-|} \approx \frac{|S_{17}^+|}{|S_{17}^-|} \approx \frac{1}{4}, \quad (\text{Equation 5})$$

where  $\cup$  represents the union symbol between two sets,  $S_i$  denotes the subset whose sgRNAs are from the  $i$ th targeting gene, the positive subset  $S_i^+$  contains high on-target activity sgRNAs, the negative subset  $S_i^-$  contains the low on-target activity sgRNAs,  $|S_i^+|$  represents the number of sgRNAs in  $S_i^+$ ,  $|S_i^-|$  represents the number of

**Table 3. List of the AUC Scores Obtained by Various Methods on the On-Target Dataset Reported in Chuai et al.<sup>46</sup>**

| Cell Type <sup>a</sup> | Methods                              | AUC (%) |
|------------------------|--------------------------------------|---------|
| <i>hct116</i>          | Azimuth <sup>b</sup>                 | 74.1    |
|                        | DeepCRISPR (pt+aug CNN) <sup>c</sup> | 87.4    |
|                        | sgRNA-PSM <sup>d</sup>               | 91.7    |
|                        | Retrained sgRNA-PSM <sup>e</sup>     | 74.0    |
| <i>Hela</i>            | Azimuth <sup>b</sup>                 | 67.5    |
|                        | DeepCRISPR (pt+aug CNN) <sup>c</sup> | 78.2    |
|                        | sgRNA-PSM <sup>d</sup>               | 82.8    |
| <i>hl60</i>            | Retrained sgRNA-PSM <sup>e</sup>     | 72.1    |
|                        | Azimuth <sup>b</sup>                 | 79.2    |
|                        | DeepCRISPR (pt+aug CNN) <sup>c</sup> | 73.9    |
|                        | sgRNA-PSM <sup>d</sup>               | 77.6    |
|                        | Retrained sgRNA-PSM <sup>e</sup>     | 83.7    |

<sup>a</sup>The cell type of the independent test dataset.

<sup>b</sup>Results reported in Chuai et al.<sup>46</sup>

<sup>c</sup>Results reported in Chuai et al.<sup>46</sup>

<sup>d</sup>The sgRNA-PSM predictor trained with the dataset reported in Chuai et al.;<sup>46</sup> see Equations 9 and 10 with  $k = 4$ ,  $m = 2$ ,  $\zeta = 9$ ,  $R = 0.05$ ,  $F = 2,300$ .

<sup>e</sup>The sgRNA-PSM predictor trained with each of the three datasets (*hct116*, *hela*, and *hl60*).

sgRNAs in  $S_i^-$ , and  $|S_i^+|/|S_i^-|$  denotes the number of sgRNAs in  $|S_i^+|$  and  $|S_i^-|$  in a ratio of about 1:4. The corresponding detailed sequences can be found in [Data S1](#).

The most updated on-target dataset established in Chuai et al.<sup>46</sup> was employed to further evaluate the performance of the proposed method. This on-target dataset was constructed based on *hct116*,<sup>49</sup> *hek293t*,<sup>37</sup> *hela*,<sup>49</sup> and *hl60*.<sup>50</sup> Those datasets were also employed by Haeussler et al.<sup>47</sup>

### PSM

Feature extraction is very important for constructing a computational predictor.<sup>51</sup> Inspired by the PS<sup>35</sup> and mismatch features,<sup>41</sup> here a novel feature extraction method, PSM, was proposed to capture the long-range sequence information and evolutionary information. Furthermore, PSM is able to efficiently reduce the dimension of the feature vectors. The detailed procedures of generating PSM are described as follows.

A DNA sample  $D$  can be represented as follows:

$$D = R_1 R_2 R_3 \dots R_i \dots R_L \quad (i = 1, 2, 3, \dots, L), \quad (\text{Equation 6})$$

where

$$R_i \in \{A(\text{adenine}), C(\text{cytosine}), G(\text{guanine}), T(\text{thymine})\}, \quad (i = 1, 2, 3, \dots, L) \quad (\text{Equation 7})$$

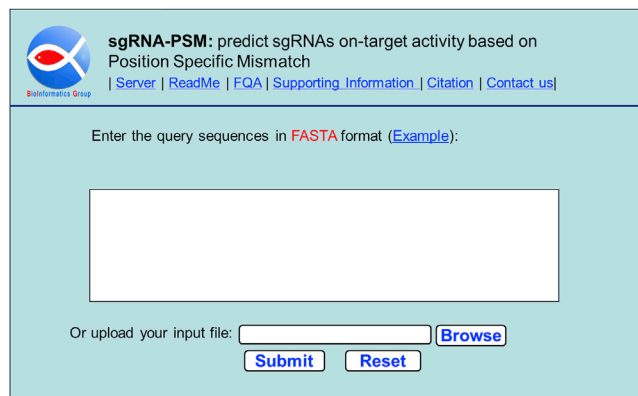

**Figure 3.** Graphic of the Homepage of the Web Server <http://bliulab.net/sgRNA-PSM/>

represents the  $i$ th nucleobase in the sequence, the symbol  $\in$  denotes “member of” in the set, and  $L$  represents the length of  $\mathbf{D}$ .

The PS feature is an important and useful feature extraction method widely used in previous studies.<sup>35–38</sup> Because the position of nucleotide in a sgRNA affects its activity, the PS feature incorporates the local sequence position information by representing the  $k$ -mers<sup>41,52</sup> along a DNA sample  $\mathbf{D}$  (cf. Equation 6) by “one-hot” encoding.<sup>53</sup> By using the PS feature,  $\mathbf{D}$  can be represented as follows:<sup>35–38</sup>

$$\mathbf{D} = \left[ f_1^{\text{PS}} \cdots f_{4^k}^{\text{PS}} f_{4^k+1}^{\text{PS}} \cdots f_{2 \times 4^k}^{\text{PS}} f_{2 \times 4^k+1}^{\text{PS}} \cdots f_{(L-k) \times 4^k}^{\text{PS}} f_{(L-k) \times 4^k+1}^{\text{PS}} \cdots f_{(L-k+1) \times 4^k}^{\text{PS}} \right]^{\text{T}}, \quad (\text{Equation 8})$$

where  $\text{T}$  represents the transpose symbol,  $f_{(i-1) \times 4^k + j}^{\text{PS}}$  denotes the  $j$ th feature in the one-hot encoding at the  $i$ th position in  $\mathbf{D}$ , whose value is 0 or 1, and  $k$  is the number of adjacent nucleotides in a  $k$ -mer.

From Equation 8, we can see that the dimension of the PS vector will increase rapidly with the incensement of  $k$  values. For example, when  $k$  is equal to 6, the dimension of the PS feature vector will be  $4^6 \times (30 - 6 + 1) = 1.024 \times 10^5$ , which will cause high-dimension disaster.<sup>40,41,54</sup> Therefore, Equation 8 is useful only when  $k$  is small, and it ignores the information of non-consecutive nucleotides. As a result, it can only incorporate the short-range and consecutive nucleotide information without considering the long-range and non-consecutive nucleotide information.

The mismatch feature considers the evolutionary process and allows mismatches occurring in  $k$ -mers. Therefore, the dimension of the corresponding feature vectors can be obviously decreased compared with those of  $k$ -mers. In this study, we combined the mismatch with the PS feature and proposed a novel feature, i.e., PSM, which is defined as follows:

$$\mathbf{D} = \left[ f_1^{\text{PSM}} \cdots f_{\alpha}^{\text{PSM}} f_{\alpha+1}^{\text{PSM}} \cdots f_{2 \times \alpha}^{\text{PSM}} f_{2 \times \alpha+1}^{\text{PSM}} \cdots f_{(L-k) \times \alpha}^{\text{PSM}} f_{(L-k) \times \alpha+1}^{\text{PSM}} \cdots f_{(L-k+1) \times \alpha}^{\text{PSM}} \right]^{\text{T}}, \quad (\text{Equation 9})$$

where  $f_{(i-1) \times \alpha + j}^{\text{PSM}}$  represents the  $j$ th feature in one-hot encoding at the  $i$ th position in  $\mathbf{D}$ , whose value is 0 or 1, and  $\alpha$  denotes the number of mismatch features considering the one-hot encoding, which can be defined as follows:

$$\alpha = 4^{k-m} \times C_k^{k-m} = 4^{k-m} \times \frac{k!}{(k-m)!m!}, \quad (\text{Equation 10})$$

where  $m$  is the number of mismatches in  $k$ -mers.

As shown in Equations 9 and 10, the first  $4^{k-m} \times C_k^{k-m}$  components reflect the one-hot-encoded feature vector corresponding to the first sequence position, whereas the components from  $4^{k-m} \times C_k^{k-m} + 1$  to  $2 \times 4^{k-m} \times C_k^{k-m}$  reflect the one-hot-encoded feature vector corresponding to the second sequence position, and so forth. A feature vector formed with  $(L - k + 1) \times 4^{k-m} \times [k! / (k - m)!m!]$  components is called the PSM vector for  $\mathbf{D}$  as defined in Equation 9. A schematic diagram illustrating how to generate the PSM vector for  $\mathbf{D}$  is shown in Figure 4. Compared to the PS vector defined in Equation 8, the dimension of the PSM vector will be significantly reduced. For example, when  $k = 6$ , the PS feature vector’s dimension (cf. Equation 8) is  $1.024 \times 10^5$ , while the PSM feature vector’s dimension is  $(L - k + 1) \times 4^{k-m} \times [k! / (k - m)!m!]$  as defined in Equations 9 and 10. Now, when we assume  $m = 5$ , the dimension will be  $(30 - 6 + 1) \times 4^{6-5} \times [6! / (6 - 5)!5!] = 600$ . The size of the latter is around 1/170th that of the former. Namely, PSM can obviously reduce the dimension of the feature vector compared with PS. It is especially true for larger  $k$  values (see Table 4).

Therefore, the PSM vector (cf. Equation 9) should be used to represent the DNA samples, because PSM can overcome the aforementioned limitations for large values of  $k$ , while avoiding the high-dimension disaster problem.

Finally, we can augment the PSM vector (cf. Equation 9) to

$$\tilde{\mathbf{D}} = \left[ f_1^{\text{PSM}} \cdots f_{\alpha}^{\text{PSM}} f_{\alpha+1}^{\text{PSM}} \cdots f_{2 \times \alpha}^{\text{PSM}} f_{2 \times \alpha+1}^{\text{PSM}} \cdots f_{(L-k) \times \alpha}^{\text{PSM}} f_{(L-k) \times \alpha+1}^{\text{PSM}} \cdots f_{(L-k+1) \times \alpha}^{\text{PSM}} a b \right]^{\text{T}}, \quad (\text{Equation 11})$$

where  $\tilde{\mathbf{D}}$  is the augmented PSM,  $a$  is the amino acid cut position, and  $b$  is the percent peptide given in Doench et al.<sup>37</sup> Both of these two features were obtained by wet experiments, which are often unavailable. The feature vector formed with  $(L - k + 1) \times 4^{k-m} \times [k! / (k - m)!m!] + 2$  components is the ExPSM vector for  $\mathbf{D}$ .

### XGBoost Algorithm

The XGBoost algorithm<sup>55</sup> is a technique for classification and regression tasks, which is based on tree boosting.<sup>8</sup> The most important advantage

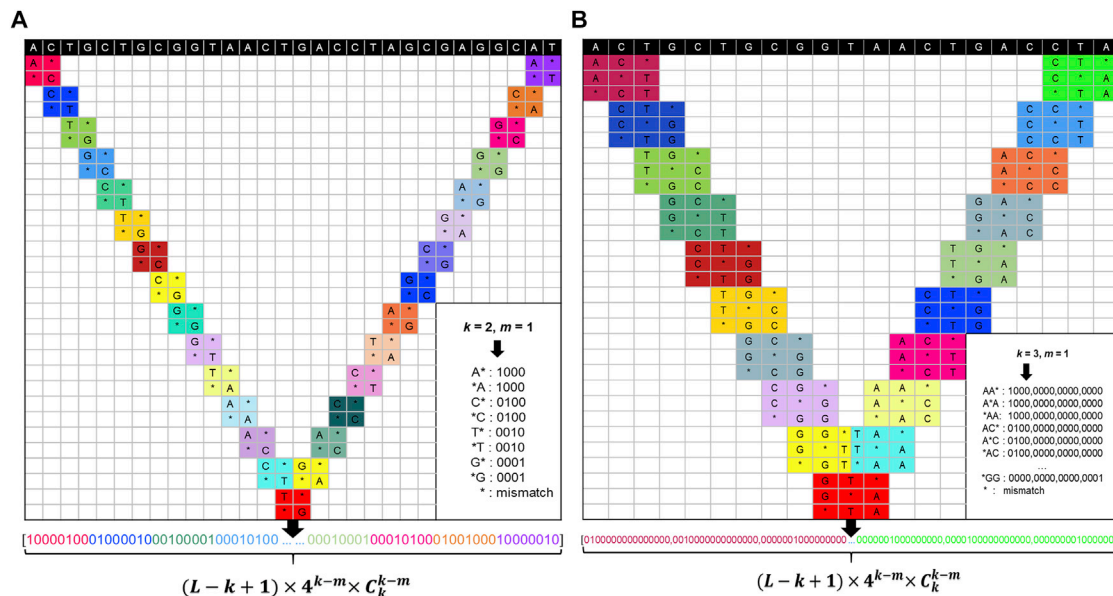

**Figure 4. Schematic Diagram Illustrating How to Generate the PSM Vector for a DNA Sequence**

(A) Example of PSM with parameters of  $k = 2, m = 1$ . (B) Example of PSM with parameters of  $k = 3, m = 1$ .

of XGBoost is its scalability in all scenarios. For more detailed information on XGBoost, please refer to Chen and Guestrin.<sup>55</sup>

In this study, the regression model of the XGBoost algorithm was employed. We used the scikit-learn package<sup>42</sup> to implement the XGBoost algorithm. The values of its three main parameters (maximum depth of a tree  $C$ , boosting learning rate  $R$ , and number of boosted trees  $F$ )

are given in the following sections, and all the other parameters were set as default values.

Finally, according to Equations 9 and 11, two predictors have been proposed as follows:

$$\begin{cases} sgRNA - PSM, & \text{if use } D \text{ of Eq.7 to denote DNA samples} \\ sgRNA - ExPSM, & \text{if use } \tilde{D} \text{ of Eq.9 to denote DNA samples} \end{cases} \quad \text{(Equation 12)}$$

**Table 4. Comparison between the PS Feature Vector's dimension (cf. Equation 8) and the PSM Feature Vector's Dimension (cf. Equation 9)**

| $k$ | Dimension of PS Vector <sup>a</sup> | $m$ | Dimension of PSM Vector <sup>b</sup> | Ratio $\gamma^c$ |
|-----|-------------------------------------|-----|--------------------------------------|------------------|
| 2   | 464                                 | 1   | 232                                  | $\sim 2$         |
| 3   | 1,792                               | 1   | 1,344                                | $\sim 1.3$       |
|     |                                     | 2   | 336                                  | $\sim 5.3$       |
| 4   | 6,912                               | 1   | 6,912                                | 1                |
|     |                                     | 2   | 2,592                                | $\sim 2.7$       |
|     |                                     | 3   | 432                                  | $\sim 16$        |
| 5   | 26,624                              | 2   | 16,640                               | $\sim 1.6$       |
|     |                                     | 3   | 4,160                                | $\sim 6.4$       |
| 6   | 102,400                             | 4   | 520                                  | $\sim 51.2$      |
|     |                                     | 4   | 6,000                                | $\sim 17.07$     |
|     |                                     | 5   | 600                                  | $\sim 170.67$    |
| ⋮   | ⋮                                   | ⋮   | ⋮                                    | ⋮                |
| ⋮   | ⋮                                   | ⋮   | ⋮                                    | ⋮                |

<sup>a</sup>Calculated by Equation 8.

<sup>b</sup>Calculated by Equation 9.

<sup>c</sup>Ratio of the number of column 2 and the number of column 4; it is the same with  $\gamma = 4^m \times [(k - m)! / k!]$ , where  $m$  is given in column 3.

### Evaluation Method of Performance

The AUC, as it pertains to the ROC curve,<sup>56–58</sup> is a widely used measure for evaluating the performance of the predictors. The better predictor corresponds to larger AUC values.

### Cross-Validation

The cross-validation method is an important step for evaluating the performance of a predictor.<sup>59</sup> In this study, in order to ensure that a predictor can be generalized across genes, the leave-one-gene-out cross-validation<sup>35,37</sup> was used, where each of the 17 subsets of  $S_i$  (cf. Equation 3) was selected one by one as the test set, while the other 16 subsets were used to construct the training set to train the predictor. This process was repeated for 17 times, and each subset was selected as the test set once.

### Implementation of the Competing Methods

In this study, we compared the proposed methods with three state-of-the-art methods, including ge-CRISPR,<sup>36</sup> Azimuth,<sup>37</sup> and CRISPRpred.<sup>38</sup> The detailed processes of these three approaches were introduced as follows: for ge-CRISPR, the 464 dinucleotide (1-

degree) binary features were finally fed into SVM regressor with a radial basis function (RBF) kernel with a  $c$  value of  $2^5$  for regression. For Azimuth, seven features were used to represent the samples, including position-independent, position-specific, GC count, NGGN, thermodynamic features, amino acid cut position, and percent peptide. These features were combined with GBR with the parameters `learning_rate = 0.1`, `max_depth = 3`, and `n_estimators = 100` to construct the predictor. For CRISPRpred, five different feature extraction methods were employed, including position-independent, position-specific, thermodynamic features, amino acid cut position, and percent peptide. Please note that ViennaRNA package version 2.0<sup>60</sup> was used to generate thermodynamic features. RF<sup>39</sup> was then performed on these features to select 2,899 relevant features according to the importance scores (Mean Decrease Gini) with the maximum number of trees of 500. These features were finally fed into the SVM regressor with linear kernel function with a  $c$  value of  $2^{-2}$  for regression.

## SUPPLEMENTAL INFORMATION

Supplemental Information can be found online at <https://doi.org/10.1016/j.omtn.2020.01.029>.

## ACKNOWLEDGMENTS

This work was supported by the Beijing Natural Science Foundation (JQ19019); the National Natural Science Foundation of China (61822306 and 61672184); the Fok Ying-Tung Education Foundation for Young Teachers in the Higher Education Institutions of China (161063); and the Scientific Research Foundation in Shenzhen (JCYJ20180306172207178, JCYJ20180306172156841, and JCYJ20180507183608379).

## REFERENCES

- Urnov, F.D., Miller, J.C., Lee, Y.L., Beausejour, C.M., Rock, J.M., Augustus, S., Jamieson, A.C., Porteus, M.H., Gregory, P.D., and Holmes, M.C. (2005). Highly efficient endogenous human gene correction using designed zinc-finger nucleases. *Nature* 435, 646–651.
- Mussolino, C., Morbitzer, R., Lütge, F., Dannemann, N., Lahaye, T., and Cathomen, T. (2011). A novel TALE nuclease scaffold enables high genome editing activity in combination with low toxicity. *Nucleic Acids Res.* 39, 9283–9293.
- Cong, L., Ran, F.A., Cox, D., Lin, S., Barretto, R., Habib, N., Hsu, P.D., Wu, X., Jiang, W., Marraffini, L.A., and Zhang, F. (2013). Multiplex genome engineering using CRISPR/Cas systems. *Science* 339, 819–823.
- Mali, P., Yang, L., Esvelt, K.M., Aach, J., Guell, M., DiCarlo, J.E., Norville, J.E., and Church, G.M. (2013). RNA-guided human genome engineering via Cas9. *Science* 339, 823–826.
- Lander, E.S. (2016). The heroes of CRISPR. *Cell* 164, 18–28.
- Hartenian, E., and Doench, J.G. (2015). Genetic screens and functional genomics using CRISPR/Cas9 technology. *FEBS J.* 282, 1383–1393.
- Jinek, M., Chylinski, K., Fonfara, I., Hauer, M., Doudna, J.A., and Charpentier, E. (2012). A programmable dual-RNA-guided DNA endonuclease in adaptive bacterial immunity. *Science* 337, 816–821.
- Friedman, J.H. (2001). Greedy function approximation: a gradient boosting machine. *Ann. Stat.* 29, 1189–1232.
- Fu, X., Zhu, W., Cai, L., Liao, B., Peng, L., Chen, Y., and Yang, J. (2019). Improved pre-miRNAs identification through mutual information of pre-miRNA sequences and structures. *Front. Genet.* 10, 119.
- Cai, Y.D., Zhou, G.P., and Chou, K.C. (2003). Support vector machines for predicting membrane protein types by using functional domain composition. *Biophys. J.* 84, 3257–3263.
- Suykens, J.A.K., and Vandewalle, J. (1999). Least squares support vector machine classifiers. *Neural Process. Lett.* 9, 293–300.
- Li, D., Ju, Y., and Zou, Q. (2016). Protein folds prediction with hierarchical structured SVM. *Curr. Proteomics* 13, 79–85.
- Liu, B., Li, C.C., and Yan, K. (2019). DeepSVM-fold: protein fold recognition by combining support vector machines and pairwise sequence similarity scores generated by deep learning networks. *Brief. Bioinform.* Published online October 28, 2019. <https://doi.org/10.1093/bib/bbz098>.
- Fu, X., Ke, L., Cai, L., Chen, X., Ren, X., and Gao, M. (2019). Improved prediction of cell-penetrating peptides via effective orchestrating amino acid composition feature representation. *IEEE Access* 7, 163547–163555.
- Lu, X., Qian, X., Li, X., Miao, Q., and Peng, S. (2019). DMCM: a data-adaptive mutation clustering method to identify cancer-related mutation clusters. *Bioinformatics* 35, 389–397.
- Lu, X., Li, X., Liu, P., Qian, X., Miao, Q., and Peng, S. (2018). The integrative method based on the module-network for identifying driver genes in cancer subtypes. *Molecules* 23, 183.
- Zeng, X., Liu, L., Lü, L., and Zou, Q. (2018). Prediction of potential disease-associated microRNAs using structural perturbation method. *Bioinformatics* 34, 2425–2432.
- Fu, X., Zhu, W., Liao, B., Cai, L., Peng, L., and Yang, J. (2018). Improved DNA-binding protein identification by incorporating evolutionary information into the Chou's PseAAC. *IEEE Access* 6, 66545–66556.
- Lin, C., Chen, W., Qiu, C., Wu, Y., Krishnan, S., and Zou, Q. (2014). LibD3C: ensemble classifiers with a clustering and dynamic selection strategy. *Neurocomputing* 123, 424–435.
- Zou, Q., Guo, J., Ju, Y., Wu, M., Zeng, X., and Hong, Z. (2015). Improving tRNAscan-SE annotation results via ensemble classifiers. *Mol. Inform.* 34, 761–770.
- Zeng, X., Wang, W., Chen, C., and Yen, G.G. (2019). A Consensus Community-Based Particle Swarm Optimization for Dynamic Community Detection. *IEEE Trans. Cybern.* Published online September 23, 2019. <https://doi.org/10.1109/TCYB.2019.2938895>.
- Wei, L., Chen, H., and Su, R. (2018). M6APred-EL: a sequence-based predictor for identifying N6-methyladenosine sites using ensemble learning. *Mol. Ther. Nucleic Acids* 12, 635–644.
- Wei, L., Wan, S., Guo, J., and Wong, K.K. (2017). A novel hierarchical selective ensemble classifier with bioinformatics application. *Artif. Intell. Med.* 83, 82–90.
- Wei, L., Xing, P., Zeng, J., Chen, J., Su, R., and Guo, F. (2017). Improved prediction of protein-protein interactions using novel negative samples, features, and an ensemble classifier. *Artif. Intell. Med.* 83, 67–74.
- Zeng, X., Lin, Y., He, Y., Lv, L., Min, X., and Rodriguez-Paton, A. (2019). Deep collaborative filtering for prediction of disease genes. *IEEE/ACM Trans. Comput. Biol. Bioinform.* Published online March 26, 2019. <https://doi.org/10.1109/TCBB.2019.2907536>.
- Wei, L., Ding, Y., Su, R., Tang, J., and Zou, Q. (2018). Prediction of human protein subcellular localization using deep learning. *J. Parallel Distrib. Comput.* 117, 212–217.
- Lin, X., Quan, Z., Wang, Z.-J., Huang, H., and Zeng, X. (2019). A novel molecular representation with BiGRU neural networks for learning atom. *Brief. Bioinform.* Published online November 15, 2019. doi: <https://doi.org/10.1093/bib/bbz125>.
- Yu, L., Sun, X., Tian, S.W., Shi, X.Y., and Yan, Y.L. (2018). Drug and nondrug classification based on deep learning with various feature selection strategies. *Curr. Bioinform.* 13, 253–259.
- Song, T., Rodriguez-Patón, A., Zheng, P., and Zeng, X. (2018). Spiking neural P systems with colored spikes. *IEEE Trans. Cogn. Dev. Syst.* 10, 1106–1115.
- Wei, L., Su, R., Wang, B., Li, X., and Zou, Q. (2019). Integration of deep feature representations and handcrafted features to improve the prediction of N<sup>6</sup>-methyladenosine sites. *Neurocomputing* 324, 3–9.
- Hong, Z., Zeng, X., Wei, L., and Liu, X. (2019). Identifying enhancer-promoter interactions with neural network based on pre-trained DNA vectors and attention

- mechanism. *Bioinformatics*. Published online September 6, 2019. <https://doi.org/10.1093/bioinformatics/btz694>.
32. Liu, X., Hong, Z., Liu, J., Lin, Y., Rodríguez-Patón, A., Zou, Q., and Zeng, X. (2019). Computational methods for identifying the critical nodes in biological networks. *Brief. Bioinform.* Published online February 12, 2019. <https://doi.org/10.1093/bib/bbz011>.
  33. Yan, K., Xu, Y., Fang, X., Zheng, C., and Liu, B. (2017). Protein fold recognition based on sparse representation based classification. *Artif. Intell. Med.* 79, 1–8.
  34. Liu, B., Weng, F., Huang, D.-S., and Chou, K.-C. (2018). iRO-3wPseKNC: identify DNA replication origins by three-window-based PseKNC. *Bioinformatics* 34, 3086–3093.
  35. Doench, J.G., Hartenian, E., Graham, D.B., Tothova, Z., Hegde, M., Smith, I., Sullender, M., Ebert, B.L., Xavier, R.J., and Root, D.E. (2014). Rational design of highly active sgRNAs for CRISPR-Cas9-mediated gene inactivation. *Nat. Biotechnol.* 32, 1262–1267.
  36. Kaur, K., Gupta, A.K., Rajput, A., and Kumar, M. (2016). ge-CRISPR—an integrated pipeline for the prediction and analysis of sgRNAs genome editing efficiency for CRISPR/Cas system. *Sci. Rep* 6, 30870.
  37. Doench, J.G., Fusi, N., Sullender, M., Hegde, M., Vaimberg, E.W., Donovan, K.F., Smith, I., Tothova, Z., Wilen, C., Orchard, R., et al. (2016). Optimized sgRNA design to maximize activity and minimize off-target effects of CRISPR-Cas9. *Nat. Biotechnol.* 34, 184–191.
  38. Rahman, M.K., and Rahman, M.S. (2017). CRISPRpred: a flexible and efficient tool for sgRNAs on-target activity prediction in CRISPR/Cas9 systems. *PLoS ONE* 12, e0181943.
  39. Ho, T.K. (1998). The random subspace method for constructing decision forests. *IEEE Trans. Pattern Anal.* 20, 832–844.
  40. Wang, T., Yang, J., Shen, H.B., and Chou, K.C. (2008). Predicting membrane protein types by the LLDA algorithm. *Protein Pept. Lett.* 15, 915–921.
  41. Liu, B., Fang, L., Wang, S., Wang, X., Li, H., and Chou, K.C. (2015). Identification of microRNA precursor with the degenerate K-tuple or Kmer strategy. *J. Theor. Biol.* 385, 153–159.
  42. Pedregosa, F., Varoquaux, G., Gramfort, A., Michel, V., Thirion, B., Grisel, O., Blondel, M., Müller, A., Nothman, J., Louppe, G., et al. (2011). scikit-learn: machine learning in Python. *J. Mach. Learn. Res.* 12, 2825–2830.
  43. Chandrashekar, G., and Sahin, F. (2014). A survey on feature selection methods. *Comput. Electr. Eng.* 40, 16–28.
  44. Zhu, L.J., Holmes, B.R., Aronin, N., and Brodsky, M.H. (2014). CRISPRseek: a bio-conductor package to identify target-specific guide RNAs for CRISPR-Cas9 genome-editing systems. *PLoS ONE* 9, e108424.
  45. Nishimasu, H., Ran, F.A., Hsu, P.D., Konermann, S., Shehata, S.I., Dohmae, N., Ishitani, R., Zhang, F., and Nureki, O. (2014). Crystal structure of Cas9 in complex with guide RNA and target DNA. *Cell* 156, 935–949.
  46. Chuai, G., Ma, H., Yan, J., Chen, M., Hong, N., Xue, D., Zhou, C., Zhu, C., Chen, K., Duan, B., et al. (2018). DeepCRISPR: optimized CRISPR guide RNA design by deep learning. *Genome Biol.* 19, 80.
  47. Haeussler, M., Schönig, K., Eckert, H., Eschstruth, A., Mianné, J., Renaud, J.B., Schneider-Maunoury, S., Shkumatava, A., Teboul, L., Kent, J., et al. (2016). Evaluation of off-target and on-target scoring algorithms and integration into the guide RNA selection tool CRISPOR. *Genome Biol.* 17, 148.
  48. Liu, B., Gao, X., and Zhang, H. (2019). BioSeq-Analysis2.0: an updated platform for analyzing DNA, RNA and protein sequences at sequence level and residue level based on machine learning approaches. *Nucleic Acids Res.* 47, e127.
  49. Hart, T., Chandrashekar, M., Aregger, M., Steinhart, Z., Brown, K.R., MacLeod, G., Mis, M., Zimmermann, M., Fradet-Turcotte, A., Sun, S., et al. (2015). High-resolution CRISPR screens reveal fitness genes and genotype-specific cancer liabilities. *Cell* 163, 1515–1526.
  50. Wang, T., Wei, J.J., Sabatini, D.M., and Lander, E.S. (2014). Genetic screens in human cells using the CRISPR-Cas9 system. *Science* 343, 80–84.
  51. Liu, B., and Li, K. (2019). iPromoter-2L2.0: identifying promoters and their types by combining smoothing cutting window algorithm and sequence-based features. *Mol. Ther. Nucleic Acids* 18, 80–87.
  52. Liu, B. (2019). BioSeq-Analysis: a platform for DNA, RNA and protein sequence analysis based on machine learning approaches. *Brief. Bioinform.* 20, 1280–1294.
  53. Harris, D.M., and Harris, S. (2013). Introductory digital design & computer architecture curriculum. *Proceedings of the 2013 IEEE International Conference on Microelectronic Systems Education (IEEE)*, pp. 14–16.
  54. Li, C.-C., and Liu, B. (2019). MotifCNN-fold: protein fold recognition based on fold-specific features extracted by motif-based convolutional neural networks. *Brief. Bioinform.* Published online November 28, 2019. <https://doi.org/10.1093/bib/bbz133>.
  55. Chen, T., and Guestrin, C. (2016). Xgboost: a scalable tree boosting system. *Proceedings of the 22nd ACM SIGKDD International Conference on Knowledge Discovery and Data Mining (ACM)*, pp. 785–794.
  56. Fawcett, T. (2006). An introduction to ROC analysis. *Pattern Recognit. Lett.* 27, 861–874.
  57. Hanley, J.A., and McNeil, B.J. (1982). The meaning and use of the area under a receiver operating characteristic (ROC) curve. *Radiology* 143, 29–36.
  58. Liu, B., and Zhu, Y. (2019). ProtDec-LTR3.0: protein remote homology detection by incorporating profile-based features into Learning to Rank. *IEEE Access* 7, 102499–102507.
  59. Liu, B., Zhu, Y., and Yan, K. (2019). Fold-LTR-TCP: protein fold recognition based on triadic closure principle. *Brief. Bioinform.* Published online December 8, 2019. <https://doi.org/10.1093/bib/bbz139>.
  60. Lorenz, R., Bernhart, S.H., Höner Zu Siederdisen, C., Tafer, H., Flamm, C., Stadler, P.F., and Hofacker, I.L. (2011). ViennaRNA package 2.0. *Algorithms Mol. Biol* 6, 26.



OMTN, Volume 20

## **Supplemental Information**

### **sgRNA-PSM: Predict sgRNAs On-Target Activity Based on Position-Specific Mismatch**

**Bin Liu, Zihua Luo, and Juan He**

**Online Supporting Information S1.** This benchmark dataset  $\mathcal{S}$  consists of 5310 guide sequences targeting 11 human genes (CD13, CD15, CD33, CCDC101, MED12, TADA2B, TADA1, HPRT, CUL3, NF1, NF2) and 6 mouse genes (Cd45, Cd28, Cd43, Cd5, H2-K, Thy1). There are 1059 high on-target activity sgRNAs, and 4251 low on-target activity sgRNAs. See the text of the paper for further explanation.

---

(1)  $\mathcal{S}_1^+$ : 78 high on-target activity sgRNAs targeting CD13

```

>CD13_HsgRNA1
ATTGAAGAGAGACAGTACATGCCCTGGGAG
>CD13_HsgRNA2
TGACAATGAAGGCCAGCAAGTACGTGGACA
>CD13_HsgRNA3
GTGGAATGACCTGTGGCTGAACGAGGGCTT
>CD13_HsgRNA4
CAGCACCCAGGTACTCCACGTAGGAGGCGA
>CD13_HsgRNA5
GGGAACCTGGTGACCATAGAGTGGTGGAAAT
>CD13_HsgRNA6
GTGAACTACGACGAAGAGAAGTGGAGGAAG
>CD13_HsgRNA7
TGGAACTCAGTGACATTCCAGTTGGGGTCT
>CD13_HsgRNA8
TCGCACTGTCAGTGGTGTACTCCCAGGAGA
>CD13_HsgRNA9
TTGAAGAGAGACAGTACATGCCCTGGGAGG
>CD13_HsgRNA10
AGTCAGCACCCAGGTACTCCACGTAGGAGG
>CD13_HsgRNA11
GGGAAGCCCATCTGCAGGGTCCAGCGGTTC
>CD13_HsgRNA12
TCTCATACTGGCTGTCCTTACCAGGGAGC
>CD13_HsgRNA13
GGTCATCACGGTGGATAACCAGCACGGGGAC
>CD13_HsgRNA14
TCTTCAGCACATCAGGCAATGAGTGGGTCC
>CD13_HsgRNA15
TCAACATCACGCTTATCCACCCCAAGGACC
>CD13_HsgRNA16
CGGTCATCACGGTGGATAACCAGCACGGGGA
>CD13_HsgRNA17
CCATCCAACCTCCCACCACCGTGCGGGACA
>CD13_HsgRNA18
CACACCAGGATCCACCCCAACCTGCGGTCC

```

>CD13\_HsgRNA19  
TGTGCCCATCACATCCATCAGAGATGGCAG  
>CD13\_HsgRNA20  
TGCACCTCAAGGGCTCCCTGGTGAAGGACA  
>CD13\_HsgRNA21  
ACCACCTTGGACCAAAGTAAAGCGTGAAT  
>CD13\_HsgRNA22  
TGAACGAGGGCTTCGCCTCCTACGTGGAGT  
>CD13\_HsgRNA23  
GGGCCGGCGTGTGATCTCCGAGGCGGGTG  
>CD13\_HsgRNA24  
TGGCCGGCTCATCGAAGCATGGGAAGGACT  
>CD13\_HsgRNA25  
AGGACGTATTC AAGCAGGGCCTGGCGGTGA  
>CD13\_HsgRNA26  
GCACCGTCCGTTTCACCTGCAAGGAGGCCA  
>CD13\_HsgRNA27  
ACCGCGTGATGGCAGTGGATGCACTGGCCT  
>CD13\_HsgRNA28  
CCGTCTACTGCAACGCTATCGCCCAGGGCG  
>CD13\_HsgRNA29  
TCTCCTCACACTCTGGA ACTCCGTTGGAGC  
>CD13\_HsgRNA30  
TGGTGAAGGACAGCCAGTATGAGATGGACA  
>CD13\_HsgRNA31  
TGATGACCGGAAGCCCATCTGCAGGGTCC  
>CD13\_HsgRNA32  
AAGAGAGACAGTACATGCCCTGGGAGGCCG  
>CD13\_HsgRNA33  
ATGAGATGGACAGCGAGTTCGAGGGGGAGT  
>CD13\_HsgRNA34  
TACTGCAACGCTATCGCCCAGGGCGGGGAG  
>CD13\_HsgRNA35  
CAACGCCGGCGCCATGGAGAACTGGGGACT  
>CD13\_HsgRNA36  
TCCAGCGTTTCATGATGTCCCGCACGGTGG  
>CD13\_HsgRNA37  
TCAAGCTCATGTTTGACCGCTCCGAGGTCT  
>CD13\_HsgRNA38  
GTGGGCTCCGCATAGTCAGCACCCAGGTAC  
>CD13\_HsgRNA39  
GGATGCTCTCCAGCTTCTGTCCGAGGACG  
>CD13\_HsgRNA40  
CCCTGCTTGAATACGTCCTCGGACAGGAAG

>CD13\_HsgRNA41  
TGGTGGAGCCCACCGAGTACCTGGTGGTGC  
>CD13\_HsgRNA42  
TCTGGGCCGGCGTGTGATCTCCGAGGCGG  
>CD13\_HsgRNA43  
GATTGGCCTGCCAGACTTCAACGCCGGCGC  
>CD13\_HsgRNA44  
CCGAGGCCGGTGTGGACAGCGGGTGGGAGG  
>CD13\_HsgRNA45  
AGATGGGCTTCCCGGTCATCACGGTGGATA  
>CD13\_HsgRNA46  
ACCCGGTAATAGCCCGTCACATTGAGGTTC  
>CD13\_HsgRNA47  
GTGAGGTACGGTCTCAGCGTCACCCGGTAG  
>CD13\_HsgRNA48  
GAGGGGTGGCAGACACTCACCGAGTGGTCT  
>CD13\_HsgRNA49  
GCAAGTACGTGGACATCTTGGGCGTGGTGT  
>CD13\_HsgRNA50  
TGCAGTAGACGGTGGACCGCAGGTTGGGGT  
>CD13\_HsgRNA51  
TGAAGTAGCTCAGGCTGCTCAGGGCGGCCT  
>CD13\_HsgRNA52  
CGTAGTCGAACTCACTGACAATGAAGCCA  
>CD13\_HsgRNA53  
GCCAGTGCATCCACTGCCATCACGCGGTAC  
>CD13\_HsgRNA54  
CTACGTGGAGAAGCAGGCATCCAATGGTGT  
>CD13\_HsgRNA55  
AGCGGTTCATGATGTCCCGCACGGTGGTGG  
>CD13\_HsgRNA56  
CTCCGTTGGAGCAGGCGGTGCTGATGGCAT  
>CD13\_HsgRNA57  
ACCATAGAGTGGTGAATGACCTGTGGCTG  
>CD13\_HsgRNA58  
AAGCTCAACTACACCCTCAGCCAGGGGCAC  
>CD13\_HsgRNA59  
GTCATCACGGTGGATACCAGCACGGGGACC  
>CD13\_HsgRNA60  
CTCTTCAGCACATCAGGCAATGAGTGGGTC  
>CD13\_HsgRNA61  
AGACTCAGCTGCAGAGAGACCACTCGGTGA  
>CD13\_HsgRNA62  
CAGCTCAGTCTTGTCAATGTCGGGGGGCTG

>CD13\_HsgRNA63  
 TCCATCCAAC TCCCCACCACCGTGCGGGAC  
 >CD13\_HsgRNA64  
 GATCTCCGAGGCGGGTGTGGACAGCGGGTG  
 >CD13\_HsgRNA65  
 AGCATCCTGAGGACTGAGGCGCCCTGGGGT  
 >CD13\_HsgRNA66  
 ACTGTCTCTCTTCAATCAGGAAGAGGGTGT  
 >CD13\_HsgRNA67  
 CAGTTCTCTTCGTCGTAGTTCACCCGGTAA  
 >CD13\_HsgRNA68  
 ATGATCTGTGCCCGATTGATGACAGGGATG  
 >CD13\_HsgRNA69  
 GTGATGACCGGAAGCCCATCTGCAGGGTC  
 >CD13\_HsgRNA70  
 GAGGTGCACCACCAGGTACTCGGTGGGCTC  
 >CD13\_HsgRNA71  
 ACCATGCACCTCCGTACCTTCATGGGGCCA  
 >CD13\_HsgRNA72  
 ACTCTGGAAC TCCGTTGGAGCAGGCGGTGC  
 >CD13\_HsgRNA73  
 TTCATGGCCGGCTCATCGAAGCATGGGAAG  
 >CD13\_HsgRNA74  
 CAGCTGGCTTACCAAGTTCAGGTGGGCTC  
 >CD13\_HsgRNA75  
 TTCATGGGGCCATAGACCTCGGAGCGGTCA  
 >CD13\_HsgRNA76  
 GTGCTGGTATCCACCGTGATGACCGGGAAG  
 >CD13\_HsgRNA77  
 ATGATGTGTACCGCGTGATGGCAGTGGATG  
 >CD13\_HsgRNA78  
 GTGTTGTTTCAGCGCCAGAGTGACAGGGACC

(2)  $S_2^+$ : 55 high on-target activity sgRNAs targeting CD15

>CD15\_HsgRNA1  
 TGTGACCGTGGACGTGTTCCGGCCGGGGCGG  
 >CD15\_HsgRNA2  
 TAGGACGCGCGGTTCGGTGAGCAGGCGGCAG  
 >CD15\_HsgRNA3  
 GTCCACGTGGATGAAGGCGCCGCGGGGCAC  
 >CD15\_HsgRNA4  
 ACCAACTGAGCCAACATGTGACCGTGGACG  
 >CD15\_HsgRNA5  
 CGCCACTGTCCAGGAAACAGGGGCTGGTGG

>CD15\_HsgRNA6  
CACCAGCCCCTGTTTCCTGGACAGTGGCGG  
>CD15\_HsgRNA7  
CGGTAGGAGAGCGTCCAGTTGAAGAGGTTA  
>CD15\_HsgRNA8  
TTCGAGTCGCCCTCGCACTCCCCGGGGCTG  
>CD15\_HsgRNA9  
CATCCAAACCCAGCGCTGGCCCCGGGGGCCT  
>CD15\_HsgRNA10  
GGCACAAAGACGTCCGAGTCCGCCCGGTAG  
>CD15\_HsgRNA11  
TCTTCAACTGGACGCTCTCTACCGGGCGG  
>CD15\_HsgRNA12  
CTCCCACCACAGCAGCACGCCACCGGTCCG  
>CD15\_HsgRNA13  
AAAGCACGGCCTGAGCCTCTCCGTAGGACG  
>CD15\_HsgRNA14  
GAGGCACTTGGGAAGTCGTCCACGTGGATG  
>CD15\_HsgRNA15  
GTCCGAACCCCGTCGCGACCGGTGGGCGT  
>CD15\_HsgRNA16  
GGCACCAAGGCTCGTCCCAGAAGGAGGTGA  
>CD15\_HsgRNA17  
TTTTCCACCACCGCGACCTCGTGAAGGGGC  
>CD15\_HsgRNA18  
TCGTCCACGTGGATGAAGGCGCCGCGGGGC  
>CD15\_HsgRNA19  
AGGCCCCCGGGCCAGCGCTGGGTTTGGATG  
>CD15\_HsgRNA20  
CAGCCCCTGTTTCCTGGACAGTGGCGGGGC  
>CD15\_HsgRNA21  
GGCCCCGCCACTGTCCAGGAAACAGGGGCT  
>CD15\_HsgRNA22  
GGGGCCTGGGGCTGGAGGTGCCAGGGCTT  
>CD15\_HsgRNA23  
TCACCGACCGCGCTCCTACGGAGAGGCTC  
>CD15\_HsgRNA24  
GCCCCGAGGCCGCCCTGACTGCCGGCTG  
>CD15\_HsgRNA25  
GCTTCGCAGCCCCGGGGAGTGCGAGGGCGA  
>CD15\_HsgRNA26  
GCCCCGCCACTGTCCAGGAAACAGGGGCTG  
>CD15\_HsgRNA27  
ACCGCGCTCCTACGGAGAGGCTCAGGCCG

>CD15\_HsgRNA28  
GAGCCTCTCCGTAGGACGCGCGGTTCGGTGA  
>CD15\_HsgRNA29  
GCCACTGGGACGAGCGCCAGGCCCGGGTCC  
>CD15\_HsgRNA30  
GCCCTGTTTCCTGGACAGTGGCGGGGCCA  
>CD15\_HsgRNA31  
ACGACTTCCCAAGTGCCTCCTCCCTGGCCT  
>CD15\_HsgRNA32  
GCCTGAGCCTCTCCGTAGGACGCGCGGTTCG  
>CD15\_HsgRNA33  
CGTCGCCAACCCCGTCGCGACCGGTGGGCG  
>CD15\_HsgRNA34  
GCCCGCCCCGGCCGAACACGTCCACGGTCA  
>CD15\_HsgRNA35  
GGGGGCCCTTCACGAGGTTCGCGGTGGTGG  
>CD15\_HsgRNA36  
TATCGCCGCTACTTCCACTGGCGCCGGAGC  
>CD15\_HsgRNA37  
AGTGGCGGGCCAGGCCTGAGGGCGGGTTCG  
>CD15\_HsgRNA38  
TGCTGCTGTGGTGGGAGCCCTTCGGGGGGC  
>CD15\_HsgRNA39  
TGGTGGCATGGGTGGTGGAGCCACTGGGACG  
>CD15\_HsgRNA40  
ACCCGGGCTGGCGCTCGTCCCAGTGGCTC  
>CD15\_HsgRNA41  
TCGGGGGGCCCTTCACGAGGTTCGCGGTGG  
>CD15\_HsgRNA42  
GACCGGTGGGCGTGCTGCTGTGGTGGGAGC  
>CD15\_HsgRNA43  
GCGGGTTGCGGTTCGAGGAAAAGCAGGTAC  
>CD15\_HsgRNA44  
TGCGGTTCGAGGAAAAGCAGGTACGAGGCCA  
>CD15\_HsgRNA45  
CGAGGTTCGCGGTGGTGGAAAAGCACGGCCT  
>CD15\_HsgRNA46  
GGCAGTGTGCGCCTGGATGCCCCAGGGCGG  
>CD15\_HsgRNA47  
CTCAGTTGGTGGTAGTAGCGGACCCGGGCC  
>CD15\_HsgRNA48  
CAACTACGAGCGCTTTGTGCCCCGCGGCGC  
>CD15\_HsgRNA49  
CTCTTCAACTGGACGCTCCTACCGGGCG

>CD15\_HsgRNA50  
 ACGGTCACATGTTGGCTCAGTTGGTGGTAG  
 >CD15\_HsgRNA51  
 TAGCTCCGGCGCCAGTGGAAAGTAGCGGCGA  
 >CD15\_HsgRNA52  
 GGCTTCGCAGCCCCGGGAGTGCGAGGGCG  
 >CD15\_HsgRNA53  
 GAGGTGATGTGGACAGCGTAGCTCCGGGCGC  
 >CD15\_HsgRNA54  
 TACTTGCCAGGCTTCGCAGCCCCGGGAGT  
 >CD15\_HsgRNA55  
 AACTTGTAGCGGGCCACTGTGTGCAGGAGC

(3)  $S_3^+$ : 28 high on-target activity sgRNAs targeting CD33

>CD33\_HsgRNA1  
 CCTCATCCCTGGCACTCTAGAACCCGGCCA  
 >CD33\_HsgRNA2  
 GGGTATGGGATGGAAGAAAGTGCAGGGCAC  
 >CD33\_HsgRNA3  
 ACAGCCACTCACCTGCCACAGCAGGGGCA  
 >CD33\_HsgRNA4  
 TCCTCCTGGCGTCTACGATGCTCAGGGAGC  
 >CD33\_HsgRNA5  
 TCCTCGGTGCTCATAATCACCCACGGCCC  
 >CD33\_HsgRNA6  
 CCCGGAACCAGTAACCATGAACTGGGGAGT  
 >CD33\_HsgRNA7  
 AGCTGACAACCAGGAGAAGATCGGGGGTGT  
 >CD33\_HsgRNA8  
 GCAGGAGTCAGTGACGGTACAGGAGGGTTT  
 >CD33\_HsgRNA9  
 GGCTGCAAGTGCAGGAGTCAGTGACGGTAC  
 >CD33\_HsgRNA10  
 AAGTGCAGGAGTCAGTGACGGTACAGGAGG  
 >CD33\_HsgRNA11  
 CTGAGCATCGTAGACGCCAGGAGGAGGGAT  
 >CD33\_HsgRNA12  
 TGGTGCCGTGGTCCCTGGGGCCGTGGGGTGA  
 >CD33\_HsgRNA13  
 TCCCAGGAACCAGTAACCATGAACTGGGGAG  
 >CD33\_HsgRNA14  
 GGATGGAAGAAAGTGCAGGGCACGAGGACG  
 >CD33\_HsgRNA15  
 TGCAGGAGTCAGTGACGGTACAGGAGGGTT



>CD33\_HsgRNA16  
 GAGTGGCCGGGTTCTAGAGTGCCAGGGATG  
 >CD33\_HsgRNA17  
 ACCTGTCACATGCACAGAGAGCTGGGGAGA  
 >CD33\_HsgRNA18  
 GGGAGTTCTTGTTCGTAGTAGGGTATGGGAT  
 >CD33\_HsgRNA19  
 CCATTATATCCAGGGACTCTCCAGTGGCCA  
 >CD33\_HsgRNA20  
 AGGGTATGGGATGGAAGAAAGTGCAGGGCA  
 >CD33\_HsgRNA21  
 CTCCTCCTGGCGTCTACGATGCTCAGGGAG  
 >CD33\_HsgRNA22  
 CAGCTGACAACCAGGAGAAGATCGGGGGTG  
 >CD33\_HsgRNA23  
 TCCCTGAGCATCGTAGACGCCAGGAGGAGG  
 >CD33\_HsgRNA24  
 GCCGTGGGGTGATTATGAGCACCGAGGAGT  
 >CD33\_HsgRNA25  
 CACCTGTCACATGCACAGAGAGCTGGGGAG  
 >CD33\_HsgRNA26  
 TTCTTGTTCGTAGTAGGGTATGGGATGGAAG  
 >CD33\_HsgRNA27  
 TGTTTGTGGCCACTGGAGAGTCCCTGGATA  
 >CD33\_HsgRNA28  
 CAGTTGTTCCCTACTGGGATCCCCAAGGAGG

(4)  $S_4^+$ : 30 high on-target activity sgRNAs targeting CCDC101

>CCDC101\_HsgRNA1  
 ACACAACCGCCAAGGCCGATGCAGAGGCTG  
 >CCDC101\_HsgRNA2  
 CTCTACAATGACTCGGAGCCACCCCGGAAG  
 >CCDC101\_HsgRNA3  
 ACTCAGCCTCTGCATCGGCCTTGGCGGTTG  
 >CCDC101\_HsgRNA4  
 AAACAGGACCGAGTAGTCATCCTGGGGCTG  
 >CCDC101\_HsgRNA5  
 CTGGAGGCTGCTTTACCCGCTGTGGGGGCG  
 >CCDC101\_HsgRNA6  
 ATCAAGTCTCTGTTGGAAGAGAGGCGGATT  
 >CCDC101\_HsgRNA7  
 TGGCATGGCTGTAAGTACCACCTCGGCCA  
 >CCDC101\_HsgRNA8  
 CCCTCAGCATCCTTCGAAAGCTCTGGACA

>CCDC101\_HsgRNA9  
CAAACAGGACCGAGTAGTCATCCTGGGGCT  
>CCDC101\_HsgRNA10  
GTGTCATCCCGCTGCCCCAGTGGAAGGCCA  
>CCDC101\_HsgRNA11  
GGGTCATGGCCGACTGCTGCAGCAGGGTCA  
>CCDC101\_HsgRNA12  
TGTTCCAGAAGGAGCAGCTCGTGCTGGCCC  
>CCDC101\_HsgRNA13  
GTCACCAGGCTTCCCGATCCACAGGGGCAG  
>CCDC101\_HsgRNA14  
CACCCCGGAAGACCATGCGCAGAGGGGTGC  
>CCDC101\_HsgRNA15  
GGCGCGGTAGAAGCAGGTAGTCTGGGGATA  
>CCDC101\_HsgRNA16  
ATGGCTATTCCCCTCCCCTCAATGTGGCTC  
>CCDC101\_HsgRNA17  
ATCTCTGAGCCACATTGAGGGGAGGGGAAT  
>CCDC101\_HsgRNA18  
CCCCTGTGGGGGCGCATGGATCAGGGCGC  
>CCDC101\_HsgRNA19  
TTCGAAAGCTCTGGACAAGATCGCGAAA  
>CCDC101\_HsgRNA20  
CCTGGAGGCTGCTTTACCCGCTGTGGGGGC  
>CCDC101\_HsgRNA21  
CATGGATCAGGGCGCGGTAGAAGCAGGTAG  
>CCDC101\_HsgRNA22  
AGAAGCAGGTAGTCTGGGGATACAGGGCCA  
>CCDC101\_HsgRNA23  
ACGAGCAGTGGATCCTGGCCGAGGTGGTCA  
>CCDC101\_HsgRNA24  
AGCGGGATGACACGGCGCCGGCTCAGGGTG  
>CCDC101\_HsgRNA25  
TGGAGGCTGCTTTACCCGCTGTGGGGGCGC  
>CCDC101\_HsgRNA26  
TCCATCAGCTGATCAAACAAACCCAGGTAA  
>CCDC101\_HsgRNA27  
CGTCTCCGGGTTGGCCTTCCACTGGGGCAG  
>CCDC101\_HsgRNA28  
TATCTCTGAGCCACATTGAGGGGAGGGGAA  
>CCDC101\_HsgRNA29  
CAGGTCTGGCCACGTAGTCTCCTGAGGCAG  
>CCDC101\_HsgRNA30  
GCGATCTTGTCCAGAGCTTTCCGAAGGATG

(5)  $S_5^+$ : 370 high on-target activity sgRNAs targeting MED12

>MED12\_HsgRNA1  
TGCTAAACTGCCACCTCAGTCCAGGGACA  
>MED12\_HsgRNA2  
TGCTAAACTGCCACCTCAGTCCAGGGACA  
>MED12\_HsgRNA3  
CGATAAATGCCAGGAAGCTACTGCAGGTAT  
>MED12\_HsgRNA4  
CGATAAATGCCAGGAAGCTACTGCAGGTAT  
>MED12\_HsgRNA5  
TCAAAACACTCAAGCACCCAGGTCAGGAAC  
>MED12\_HsgRNA6  
TCAAAACACTCAAGCACCCAGGTCAGGAAC  
>MED12\_HsgRNA7  
GAGGAACAGAAGAAGCTTCCAGAGGAGGAGG  
>MED12\_HsgRNA8  
CTTCAACCCCTCAAAAAGATCCCAGGGCGA  
>MED12\_HsgRNA9  
AAGGAAGACTGGCGCATGGTCCACTGGTCC  
>MED12\_HsgRNA10  
AAGGAAGACTGGCGCATGGTCCACTGGTCC  
>MED12\_HsgRNA11  
AAGCAAGGATACAGCGCTCTGCAGAGGAGC  
>MED12\_HsgRNA12  
CGCAAAGGGACAGCAGAACTGGTGGGTTT  
>MED12\_HsgRNA13  
CGCAAAGGGACAGCAGAACTGGTGGGTTT  
>MED12\_HsgRNA14  
TGAAAAGGTGAAGGAGGATGCGGCAGGTAA  
>MED12\_HsgRNA15  
TGAAAAGGTGAAGGAGGATGCGGCAGGTAA  
>MED12\_HsgRNA16  
GCCAAATACACAGTGCCTGTGATGCGGGCT  
>MED12\_HsgRNA17  
GCCAAATACACAGTGCCTGTGATGCGGGCT  
>MED12\_HsgRNA18  
GCAAAACACGGCTCCATCCACGATGCGGTTC  
>MED12\_HsgRNA19  
GCAAAACACTGCCGAGCGATGAGGATGGCAA  
>MED12\_HsgRNA20  
GCAAAACACTGCCGAGCGATGAGGATGGCAA  
>MED12\_HsgRNA21  
GTGTACAGAAGTAGGCAAGCCGGCGGGACA

>MED12\_HsgRNA22  
GTGTACAGAAGTAGGCAAGCCGGCGGGACA  
>MED12\_HsgRNA23  
CTGGACAGACATGAGTTCCTGACCTGGGTG  
>MED12\_HsgRNA24  
CTGGACAGACATGAGTTCCTGACCTGGGTG  
>MED12\_HsgRNA25  
GTGTACAGATCATAGAGATAAGCAAGGATA  
>MED12\_HsgRNA26  
GTGTACAGATCATAGAGATAAGCAAGGATA  
>MED12\_HsgRNA27  
GGATACAGCTGAGGCCAAAAACCAGGGGCC  
>MED12\_HsgRNA28  
GGATACAGCTGAGGCCAAAAACCAGGGGCC  
>MED12\_HsgRNA29  
AGGCACAGGTCATCTTAATGAGCCAGGCAG  
>MED12\_HsgRNA30  
AGGCACAGGTCATCTTAATGAGCCAGGCAG  
>MED12\_HsgRNA31  
TGTTACCCTCTGGCATGGGCAGGTTGGACG  
>MED12\_HsgRNA32  
TGTTACCCTCTGGCATGGGCAGGTTGGACG  
>MED12\_HsgRNA33  
TGCCACCTCTACATCATGGGGCAAGGGCCC  
>MED12\_HsgRNA34  
TGCCACCTCTACATCATGGGGCAAGGGCCC  
>MED12\_HsgRNA35  
ACTGACGGCCTTGAATGTAAAAACAAGGTTT  
>MED12\_HsgRNA36  
ACTGACGGCCTTGAATGTAAAAACAAGGTTT  
>MED12\_HsgRNA37  
TGGCACTCACCTGCAGGTAGTGGCTGGTTC  
>MED12\_HsgRNA38  
CTGCACTCAGTGACTTGCAATAGCCGGTCA  
>MED12\_HsgRNA39  
TAAGACTCTTGCCTAGCCCCGTGTAGGTGA  
>MED12\_HsgRNA40  
TAAGACTCTTGCCTAGCCCCGTGTAGGTGA  
>MED12\_HsgRNA41  
TCCCCTGACCCTTATCAGGTCTCCCGGAAT  
>MED12\_HsgRNA42  
TCCCCTGACCCTTATCAGGTCTCCCGGAAT  
>MED12\_HsgRNA43  
GTATACTTGCACTCTCATCTCCCGAGGGGA

>MED12\_HsgRNA44  
GTATACTTGCACTCTCATCTCCCGAGGGGA  
>MED12\_HsgRNA45  
GTGCAGAATGGCTAGGAGTGCTTAAGGCCT  
>MED12\_HsgRNA46  
GTGCAGAATGGCTAGGAGTGCTTAAGGCCT  
>MED12\_HsgRNA47  
GAAGAGACATGTTGACCCTTTCATGGGTGA  
>MED12\_HsgRNA48  
GAAGAGACATGTTGACCCTTTCATGGGTGA  
>MED12\_HsgRNA49  
ACGGAGACTGGCCCTGCAGCTGGATGGTGT  
>MED12\_HsgRNA50  
ACGGAGACTGGCCCTGCAGCTGGATGGTGT  
>MED12\_HsgRNA51  
GACCAGATGGCACAGGTCTTTGAGGGGTAA  
>MED12\_HsgRNA52  
GACCAGATGGCACAGGTCTTTGAGGGGTAA  
>MED12\_HsgRNA53  
CACCAGCATTAAAGGAGTGAAGGGATGGCAG  
>MED12\_HsgRNA54  
CACCAGCATTAAAGGAGTGAAGGGATGGCAG  
>MED12\_HsgRNA55  
AATGAGCCAGGCAGCCCGCATCACAGGCAC  
>MED12\_HsgRNA56  
AATGAGCCAGGCAGCCCGCATCACAGGCAC  
>MED12\_HsgRNA57  
CAATAGCCGGTCAGCTCTGCACACAGGATT  
>MED12\_HsgRNA58  
CAATAGCCGGTCAGCTCTGCACACAGGATT  
>MED12\_HsgRNA59  
ATGGAGCCGTGTTTGCTGTTCTCAAGGCTG  
>MED12\_HsgRNA60  
ATGGAGCCGTGTTTGCTGTTCTCAAGGCTG  
>MED12\_HsgRNA61  
ACACAGCCTTGAGAACAGCAAACACGGCTC  
>MED12\_HsgRNA62  
ACACAGCCTTGAGAACAGCAAACACGGCTC  
>MED12\_HsgRNA63  
TGTTAGGAGTTACTCACCCATGAAAGGGTC  
>MED12\_HsgRNA64  
TGTTAGGAGTTACTCACCCATGAAAGGGTC  
>MED12\_HsgRNA65  
AATGAGGATGGGGAAAACCCCCAGCGGCAG

>MED12\_HsgRNA66  
AATGAGGATGGGGAAAACCCCCAGCGGCAG  
>MED12\_HsgRNA67  
ACCAAGGCACTAGGACAGCACAGGAGGATG  
>MED12\_HsgRNA68  
ACCAAGGCACTAGGACAGCACAGGAGGATG  
>MED12\_HsgRNA69  
CTGAAGGCAGCAGCAGCAGCAAGCTGGAAG  
>MED12\_HsgRNA70  
ACTGAGGTGGGCAGTTTAGCAATGAGGGGG  
>MED12\_HsgRNA71  
CCAAAGTATGAAGTACCCGTCCAATGGTGA  
>MED12\_HsgRNA72  
CCAAAGTATGAAGTACCCGTCCAATGGTGA  
>MED12\_HsgRNA73  
GTTTCAGTCTGCATACCTGTCCCGCCGGCTT  
>MED12\_HsgRNA74  
GTTTCAGTCTGCATACCTGTCCCGCCGGCTT  
>MED12\_HsgRNA75  
TGAGAGTGCAAGTATACATGTTGTGGGAGA  
>MED12\_HsgRNA76  
GCGCATAAAGCGCATTCTCCAGGTAGGCCA  
>MED12\_HsgRNA77  
GCGCATAAAGCGCATTCTCCAGGTAGGCCA  
>MED12\_HsgRNA78  
CCAAATACACAGTGCCTGTGATGCGGGCTG  
>MED12\_HsgRNA79  
CCAAATACACAGTGCCTGTGATGCGGGCTG  
>MED12\_HsgRNA80  
CTCCATCCACGATGCGGTTCTGGGAGGCAG  
>MED12\_HsgRNA81  
CGCAATCCTGTGTGCAGAGCTGACCGGCTA  
>MED12\_HsgRNA82  
CGCAATCCTGTGTGCAGAGCTGACCGGCTA  
>MED12\_HsgRNA83  
CCCCATGATGTAGAGGTGGCAATCCGGCAG  
>MED12\_HsgRNA84  
CCCCATGATGTAGAGGTGGCAATCCGGCAG  
>MED12\_HsgRNA85  
CAGGATTGCGATGTCATTACCCCTAGGGAA  
>MED12\_HsgRNA86  
CAGGATTGCGATGTCATTACCCCTAGGGAA  
>MED12\_HsgRNA87  
TGCCATTGTTAGAGGAGCAGCACAAGGCCT

>MED12\_HsgRNA88  
TGCCATTGTTAGAGGAGCAGCACAAAGGCCT  
>MED12\_HsgRNA89  
CCACCAAACAGAAGATCTCGCCCTGGGATC  
>MED12\_HsgRNA90  
ACCCCAAACAGTACGACCAACCGCTGGTTG  
>MED12\_HsgRNA91  
ACCCCAAACAGTACGACCAACCGCTGGTTG  
>MED12\_HsgRNA92  
TTAGCAAAGATATCTTCAGCAGTGGGGAAG  
>MED12\_HsgRNA93  
GCTTCAACCCCTCAAAAAGATCCCAGGGCG  
>MED12\_HsgRNA94  
GAGGCAAGTGGTATGACATGCCAAGGGCAA  
>MED12\_HsgRNA95  
GAGGCAAGTGGTATGACATGCCAAGGGCAA  
>MED12\_HsgRNA96  
TAGGCAAGTGGTCAAGTGGTGAGCCGGTCT  
>MED12\_HsgRNA97  
TAGGCAAGTGGTCAAGTGGTGAGCCGGTCT  
>MED12\_HsgRNA98  
GCAGCACAGCGAATCAGATCTTCCAGGAGC  
>MED12\_HsgRNA99  
GCAGCACAGCGAATCAGATCTTCCAGGAGC  
>MED12\_HsgRNA100  
TTAACACATGTCCCTGGACTGAGGTGGGCA  
>MED12\_HsgRNA101  
AGTTCACCAGCATTAAAGGAGTGAAGGGATG  
>MED12\_HsgRNA102  
AGTTCACCAGCATTAAAGGAGTGAAGGGATG  
>MED12\_HsgRNA103  
TTGCCACCTCTACATCATGGGGCAAGGGCC  
>MED12\_HsgRNA104  
TTGCCACCTCTACATCATGGGGCAAGGGCC  
>MED12\_HsgRNA105  
CACCCAGAACCAGCCACTACCTGCAGGTGA  
>MED12\_HsgRNA106  
TGGTCAGACATACCTGCTGAGTGAAGGCAC  
>MED12\_HsgRNA107  
TGGTCAGACATACCTGCTGAGTGAAGGCAC  
>MED12\_HsgRNA108  
TGGACAGACATGAGTTCCTGACCTGGGTGC  
>MED12\_HsgRNA109  
TGGACAGACATGAGTTCCTGACCTGGGTGC

>MED12\_HsgRNA110  
GATACAGCTGAGGCCAAAAACCAGGGGCCG  
>MED12\_HsgRNA111  
GATACAGCTGAGGCCAAAAACCAGGGGCCG  
>MED12\_HsgRNA112  
GGGCCAGTCTCCGTGTACAGAAGTAGGCAA  
>MED12\_HsgRNA113  
CAGTCAGTGAGTAGTGCCAAACCAAGGCAC  
>MED12\_HsgRNA114  
CAGTCAGTGAGTAGTGCCAAACCAAGGCAC  
>MED12\_HsgRNA115  
TCAGCAGTGGGAAGGCTTCAGGCCGTTG  
>MED12\_HsgRNA116  
TCAGCAGTGGGAAGGCTTCAGGCCGTTG  
>MED12\_HsgRNA117  
GCCTCATCCTCAACCAGGACCAGATGGCAC  
>MED12\_HsgRNA118  
GCCTCATCCTCAACCAGGACCAGATGGCAC  
>MED12\_HsgRNA119  
AGAACATCGCCAAGGCCACAATCGAGGTTT  
>MED12\_HsgRNA120  
AGAACATCGCCAAGGCCACAATCGAGGTTT  
>MED12\_HsgRNA121  
CTAGCATCTCGCAAGGTAGCATGGAGGAAA  
>MED12\_HsgRNA122  
CTAGCATCTCGCAAGGTAGCATGGAGGAAA  
>MED12\_HsgRNA123  
GAAGCATGGGATGAACCGGTCCGATGGCTC  
>MED12\_HsgRNA124  
TCCACCAAACAGAAGATCTCGCCCTGGGAT  
>MED12\_HsgRNA125  
TGTTCAAACCAGCCCCAAGAGAGTGGTGC  
>MED12\_HsgRNA126  
TGTTCAAACCAGCCCCAAGAGAGTGGTGC  
>MED12\_HsgRNA127  
ATGACCAACACCAGGTCACGGCTCAGGTGT  
>MED12\_HsgRNA128  
ATGACCAACACCAGGTCACGGCTCAGGTGT  
>MED12\_HsgRNA129  
CAAACCAAGGCACTAGGACAGCACAGGAGG  
>MED12\_HsgRNA130  
CAAACCAAGGCACTAGGACAGCACAGGAGG  
>MED12\_HsgRNA131  
TGACCCAGAGCACAAGGAGGCTGAAGGCAG



>MED12\_HsgRNA132  
TGACCCAGAGCACAAGGAGGCTGAAGGCAG  
>MED12\_HsgRNA133  
GTAGCCAGCGAGTCATGAAAAGATAGGTCA  
>MED12\_HsgRNA134  
GTAGCCAGCGAGTCATGAAAAGATAGGTCA  
>MED12\_HsgRNA135  
GCAGCCATGAGTGCAACCAGCGGTTGGTCG  
>MED12\_HsgRNA136  
GCAGCCATGAGTGCAACCAGCGGTTGGTCG  
>MED12\_HsgRNA137  
TAGGCCACACCTGAGCCGTGACCTGGTGT  
>MED12\_HsgRNA138  
TAGGCCACACCTGAGCCGTGACCTGGTGT  
>MED12\_HsgRNA139  
TTCTCCCCTACTATGCCCTGTGAGGGGAAG  
>MED12\_HsgRNA140  
TGGGCCCCGCTAGTACCTACCTGTAGGATA  
>MED12\_HsgRNA141  
TGGGCCCCGCTAGTACCTACCTGTAGGATA  
>MED12\_HsgRNA142  
AATGCCCTTATGCACGTCTGTGTGGGGCAC  
>MED12\_HsgRNA143  
AATGCCCTTATGCACGTCTGTGTGGGGCAC  
>MED12\_HsgRNA144  
TGCTCCTCTCCTCGAGCCACTCGCCGGTCC  
>MED12\_HsgRNA145  
ACTCCCTCTTGGAGAACATCGCCAAGGCCA  
>MED12\_HsgRNA146  
ACTCCCTCTTGGAGAACATCGCCAAGGCCA  
>MED12\_HsgRNA147  
CACACCTGAGCCGTGACCTGGTGTGGTCA  
>MED12\_HsgRNA148  
CACACCTGAGCCGTGACCTGGTGTGGTCA  
>MED12\_HsgRNA149  
TCCTCCTGCAGTTTCTGGATACACAGGCTC  
>MED12\_HsgRNA150  
TCCTCCTGCAGTTTCTGGATACACAGGCTC  
>MED12\_HsgRNA151  
GGAGCCTGTGTATCCAGAACTGCAGGAGG  
>MED12\_HsgRNA152  
GGAGCCTGTGTATCCAGAACTGCAGGAGG  
>MED12\_HsgRNA153  
GACTCCTTACCTCCCTCTACAGCCAGGTGC

>MED12\_HsgRNA154  
CTTGCCTTTGGAGCCCCTGGTCCCCGGCCT  
>MED12\_HsgRNA155  
GAGTCGAGGGTGTGCTGCTAGTTGGGGGCT  
>MED12\_HsgRNA156  
CTGCCGATGACCCAGAGCACAAAGGAGGCTG  
>MED12\_HsgRNA157  
CTGCCGATGACCCAGAGCACAAAGGAGGCTG  
>MED12\_HsgRNA158  
GATGCGGCAGGTAAGCCGGGCCCCCTGGCTC  
>MED12\_HsgRNA159  
TGAGCGTGCTCATCAATGGGACATTGGCTG  
>MED12\_HsgRNA160  
TGGTCGTGTCTTCACAGTACTCTGGGGAAT  
>MED12\_HsgRNA161  
TGGTCGTGTCTTCACAGTACTCTGGGGAAT  
>MED12\_HsgRNA162  
TCTTCTCAAACACTCAAGCACCCAGGTCA  
>MED12\_HsgRNA163  
GCTTCTCAAATCCTCGGATCTGGTGGGCAG  
>MED12\_HsgRNA164  
GCAGCTCACACCTTCACCTACACGGGGCTA  
>MED12\_HsgRNA165  
TGGCCTCAGCTGTATCCTACAGGTAGGTAC  
>MED12\_HsgRNA166  
TGGCCTCAGCTGTATCCTACAGGTAGGTAC  
>MED12\_HsgRNA167  
GCAGCTCCAAGGAAGACTGGCGCATGGTCC  
>MED12\_HsgRNA168  
GCAGCTCCAAGGAAGACTGGCGCATGGTCC  
>MED12\_HsgRNA169  
GCTCCTCCTGGAGATCATCATCAGCGGCAC  
>MED12\_HsgRNA170  
GCTCCTCCTGGAGATCATCATCAGCGGCAC  
>MED12\_HsgRNA171  
TACTCTTACCTGAAACATGAACATGGCCA  
>MED12\_HsgRNA172  
TACTCTTACCTGAAACATGAACATGGCCA  
>MED12\_HsgRNA173  
CCCTCTGGCATGGGCAGGTTGGACGGGGCA  
>MED12\_HsgRNA174  
CCCTCTGGCATGGGCAGGTTGGACGGGGCA  
>MED12\_HsgRNA175  
GTGGCTGGTCGTAAAGAACCCCAAGGGTCC

>MED12\_HsgRNA176  
TTCGCTGGTCTTTCGATAAAATGCCAGGAAG  
>MED12\_HsgRNA177  
TTCGCTGGTCTTTCGATAAAATGCCAGGAAG  
>MED12\_HsgRNA178  
CTGGCTGTCTCCACAGAGATGTTGCGGCCA  
>MED12\_HsgRNA179  
CCGCCTGTCTCTTCTCCAGGAGCTTGGCTA  
>MED12\_HsgRNA180  
CCGCCTGTCTCTTCTCCAGGAGCTTGGCTA  
>MED12\_HsgRNA181  
CAGGCTGTGTGGCGTCGTGAAGCATGGGAT  
>MED12\_HsgRNA182  
CTGACTGTTGGAAAACCTCGATTGTGGCCT  
>MED12\_HsgRNA183  
CTGACTGTTGGAAAACCTCGATTGTGGCCT  
>MED12\_HsgRNA184  
TATACTTGCACTCTCATCTCCCGAGGGGAC  
>MED12\_HsgRNA185  
TATACTTGCACTCTCATCTCCCGAGGGGAC  
>MED12\_HsgRNA186  
CGTACTTGGCATAGACATCCAGACTGGCTG  
>MED12\_HsgRNA187  
CGTACTTGGCATAGACATCCAGACTGGCTG  
>MED12\_HsgRNA188  
CGTTCTTTGCGTGAAGAGGAACCCAGGTGC  
>MED12\_HsgRNA189  
CGTTCTTTGCGTGAAGAGGAACCCAGGTGC  
>MED12\_HsgRNA190  
TCATGAAAAGATAGGTCACTGACCTGGAGG  
>MED12\_HsgRNA191  
TCATGAAAAGATAGGTCACTGACCTGGAGG  
>MED12\_HsgRNA192  
TGAAGAACACCATCTACTGCAACGTGGAGC  
>MED12\_HsgRNA193  
TGAAGAACACCATCTACTGCAACGTGGAGC  
>MED12\_HsgRNA194  
AGAAGAACTTCCAGAGGAGGAGGGAGGAGG  
>MED12\_HsgRNA195  
GCAGGAAGCCCCAAGTGAACCAGAAGGATA  
>MED12\_HsgRNA196  
AGATGAGAAGGGTTCCATCGCCTCTGGCTC  
>MED12\_HsgRNA197  
GCAGGAGGAGCGGATTCTACTGTAGGCTT

>MED12\_HsgRNA198  
GCAGGAGGAGCGGATTCCCTACTGTAGGCTT  
>MED12\_HsgRNA199  
GAAGGAGGATGCGGCAGGTAAGCCGGGCCC  
>MED12\_HsgRNA200  
GAAGGAGGATGCGGCAGGTAAGCCGGGCCC  
>MED12\_HsgRNA201  
AGTCGAGGGTGTGCTGCTAGTTGGGGGCTG  
>MED12\_HsgRNA202  
AGTCGAGGGTGTGCTGCTAGTTGGGGGCTG  
>MED12\_HsgRNA203  
GCTTGATCATGAGCTGCAGCTCCAAGGAAG  
>MED12\_HsgRNA204  
GCTTGATCATGAGCTGCAGCTCCAAGGAAG  
>MED12\_HsgRNA205  
TGATGATGATCTCCAGGAGGAGCATGGCCC  
>MED12\_HsgRNA206  
TGATGATGATCTCCAGGAGGAGCATGGCCC  
>MED12\_HsgRNA207  
AGGCGATGGAACCCTTCTCATCTGCGGCTT  
>MED12\_HsgRNA208  
AGGCGATGGAACCCTTCTCATCTGCGGCTT  
>MED12\_HsgRNA209  
TTTGGATTGGGACCTAGCAAGGATGGGCAT  
>MED12\_HsgRNA210  
TTTGGATTGGGACCTAGCAAGGATGGGCAT  
>MED12\_HsgRNA211  
AGGAGCAAACACTGCCGAGCGATGAGGATG  
>MED12\_HsgRNA212  
AGGAGCAAACACTGCCGAGCGATGAGGATG  
>MED12\_HsgRNA213  
TATTGCAAGTCACTGAGTGCAGAATGGCTA  
>MED12\_HsgRNA214  
TATTGCAAGTCACTGAGTGCAGAATGGCTA  
>MED12\_HsgRNA215  
CGGGGCAATAGGCAAGTGGTCAAGTGGTGA  
>MED12\_HsgRNA216  
CGGGGCAATAGGCAAGTGGTCAAGTGGTGA  
>MED12\_HsgRNA217  
TTAAGCAATTCATCCTCTCCAGGGCGGATC  
>MED12\_HsgRNA218  
TTAAGCAATTCATCCTCTCCAGGGCGGATC  
>MED12\_HsgRNA219  
GAAGGCACTGTTACCCTCTGGCATGGGCAG

>MED12\_HsgRNA220  
GAAGGCACTGTTACCCTCTGGCATGGGCAG  
>MED12\_HsgRNA221  
TCATGCAGCCATGAGTGCAACCAGCGGTTG  
>MED12\_HsgRNA222  
TCATGCAGCCATGAGTGCAACCAGCGGTTG  
>MED12\_HsgRNA223  
TGCCGCAGGACAGCCACGATGCACAGGCAC  
>MED12\_HsgRNA224  
TGCCGCAGGACAGCCACGATGCACAGGCAC  
>MED12\_HsgRNA225  
TTCTGCATTGGTAAGCGCACAGGACGGTAT  
>MED12\_HsgRNA226  
TTCTGCATTGGTAAGCGCACAGGACGGTAT  
>MED12\_HsgRNA227  
CAATGCCCTTATGCACGTCTGTGTGGGGCA  
>MED12\_HsgRNA228  
CAATGCCCTTATGCACGTCTGTGTGGGGCA  
>MED12\_HsgRNA229  
TGCAGCGCAGCACCCAGCAGACCACGGAGT  
>MED12\_HsgRNA230  
TAGAGCGCTCTGGTGTATGGCTGGTGGCCC  
>MED12\_HsgRNA231  
TAGAGCGCTCTGGTGTATGGCTGGTGGCCC  
>MED12\_HsgRNA232  
AGCTGCGGTGTCTTGAAAAGGTGAAGGAGG  
>MED12\_HsgRNA233  
AGCTGCGGTGTCTTGAAAAGGTGAAGGAGG  
>MED12\_HsgRNA234  
ACCAGCGTTGGTCGTA CTGTTGGGGTGG  
>MED12\_HsgRNA235  
GACTGCTCACACCATCCAGCTGCAGGGCCA  
>MED12\_HsgRNA236  
ATGAGCTGCAGCTCCAAGGAAGACTGGCGC  
>MED12\_HsgRNA237  
ATGAGCTGCAGCTCCAAGGAAGACTGGCGC  
>MED12\_HsgRNA238  
GGCTGCTGGGGAAGAATTGGAGAAGGGTCA  
>MED12\_HsgRNA239  
GGCTGCTGGGGAAGAATTGGAGAAGGGTCA  
>MED12\_HsgRNA240  
CGTGGCTGGTCGTAAAGAACCCCAAGGGTC  
>MED12\_HsgRNA241  
CGTGGCTGGTCGTAAAGAACCCCAAGGGTC

>MED12\_HsgRNA242  
CTGTGCTGTCCTAGTGCCTTGGTTTGGCAC  
>MED12\_HsgRNA243  
CCTTGCTTCTTCATGCAGGCTGTGTGGCGT  
>MED12\_HsgRNA244  
CCTTGCTTCTTCATGCAGGCTGTGTGGCGT  
>MED12\_HsgRNA245  
ATGCGCTTTATGCGCTGCCGCTGGGGGTTT  
>MED12\_HsgRNA246  
GGGAGGAAGGTGAAACTGACCTGTTGGCAG  
>MED12\_HsgRNA247  
GGGAGGAAGGTGAAACTGACCTGTTGGCAG  
>MED12\_HsgRNA248  
TGAAGGAGGATGCGGCAGGTAAGCCGGGCC  
>MED12\_HsgRNA249  
TGAAGGAGGATGCGGCAGGTAAGCCGGGCC  
>MED12\_HsgRNA250  
CGGGGAGGCGCTCACCTCTGTCTTGGTAG  
>MED12\_HsgRNA251  
GTTAGGAGTTACTCACCCATGAAAGGGTCA  
>MED12\_HsgRNA252  
GTTAGGAGTTACTCACCCATGAAAGGGTCA  
>MED12\_HsgRNA253  
GGCAGGATCATCAAAGGGAGAGGGAGGCCG  
>MED12\_HsgRNA254  
TCCAGGCACTACTCACATTGTTAGGGGTCT  
>MED12\_HsgRNA255  
ATGAGGCAGGCATGATAGTGCCGCAGGACA  
>MED12\_HsgRNA256  
ATGAGGCAGGCATGATAGTGCCGCAGGACA  
>MED12\_HsgRNA257  
CATGGGCAGGTTGGACGGGGCAATAGGCAA  
>MED12\_HsgRNA258  
CATGGGCAGGTTGGACGGGGCAATAGGCAA  
>MED12\_HsgRNA259  
CGCCGGCTTGCCTACTTCTGTACACGGAGA  
>MED12\_HsgRNA260  
CGCCGGCTTGCCTACTTCTGTACACGGAGA  
>MED12\_HsgRNA261  
TTCTGGGAGGCAGCCAGCAGGTGGCGGTCTG  
>MED12\_HsgRNA262  
GTGTGGGCCTCTATCACAGAACTTGGACC  
>MED12\_HsgRNA263  
TTTGGGTCCTGAGGGTAAACATCGGGAGG

>MED12\_HsgRNA264  
CTGAGGTGGGCAGTTTAGCAATGAGGGGGG  
>MED12\_HsgRNA265  
ACCTGGTGTGGTCATAATGTGAAAGGTGC  
>MED12\_HsgRNA266  
ACCTGGTGTGGTCATAATGTGAAAGGTGC  
>MED12\_HsgRNA267  
ATGCGGTTCTGGGAGGCAGCCAGCAGGTGG  
>MED12\_HsgRNA268  
ATGCGGTTCTGGGAGGCAGCCAGCAGGTGG  
>MED12\_HsgRNA269  
TTCAGTAAGAAGGAAGAGGTGTTTGGGTAC  
>MED12\_HsgRNA270  
AGTGGTAGGGGTCCGTACTCAGCATGGGAG  
>MED12\_HsgRNA271  
AGTGGTAGGGGTCCGTACTCAGCATGGGAG  
>MED12\_HsgRNA272  
AGATGTCATCACGTGTGAGCCACAGGGCTC  
>MED12\_HsgRNA273  
AGATGTCATCACGTGTGAGCCACAGGGCTC  
>MED12\_HsgRNA274  
CCCCGTCCAACCTGCCCATGCCAGAGGGTA  
>MED12\_HsgRNA275  
CCCCGTCCAACCTGCCCATGCCAGAGGGTA  
>MED12\_HsgRNA276  
TCTGGTCCTGGTTGAGGATGAGGCAGGCAT  
>MED12\_HsgRNA277  
TGTAGTGAACAGGACTCTGAGCCAGGGGCC  
>MED12\_HsgRNA278  
TGTAGTGAACAGGACTCTGAGCCAGGGGCC  
>MED12\_HsgRNA279  
CTGAGTGAAGGCACTGTTACCCCTCTGGCAT  
>MED12\_HsgRNA280  
CTGAGTGAAGGCACTGTTACCCCTCTGGCAT  
>MED12\_HsgRNA281  
ATGGGTGGCGTACTGCACGTGTCGTGGCTG  
>MED12\_HsgRNA282  
ATGGGTGGCGTACTGCACGTGTCGTGGCTG  
>MED12\_HsgRNA283  
TGAGGTGGGCAGTTTAGCAATGAGGGGGGC  
>MED12\_HsgRNA284  
TGAGGTGGGCAGTTTAGCAATGAGGGGGGC  
>MED12\_HsgRNA285  
CTCCGTGTACAGAAGTAGGCAAGCCGGCGG

>MED12\_HsgRNA286  
CTCCGTGTACAGAAGTAGGCAAGCCGGCGG  
>MED12\_HsgRNA287  
GCCTGTGTATCCAGAACTGCAGGAGGACA  
>MED12\_HsgRNA288  
GCCTGTGTATCCAGAACTGCAGGAGGACA  
>MED12\_HsgRNA289  
TGCGGTGTCTTGAAAAGGTGAAGGAGGATG  
>MED12\_HsgRNA290  
TGCGGTGTCTTGAAAAGGTGAAGGAGGATG  
>MED12\_HsgRNA291  
ATTTGTTCTTTAAATGGCTACAGGAGGTGT  
>MED12\_HsgRNA292  
ATTTGTTCTTTAAATGGCTACAGGAGGTGT  
>MED12\_HsgRNA293  
ACTTGTGTGGCCCTGGCAGGTGGGGGGCA  
>MED12\_HsgRNA294  
TTGCTAAACTGCCACCTCAGTCCAGGGAC  
>MED12\_HsgRNA295  
TTGCTAAACTGCCACCTCAGTCCAGGGAC  
>MED12\_HsgRNA296  
CCTTTAACACATGTCCCTGGACTGAGGTGG  
>MED12\_HsgRNA297  
CCTTTAACACATGTCCCTGGACTGAGGTGG  
>MED12\_HsgRNA298  
AGTTTAAGCAATTCATCCTCTCCAGGGCGG  
>MED12\_HsgRNA299  
AGTTTAAGCAATTCATCCTCTCCAGGGCGG  
>MED12\_HsgRNA300  
CGTGTACAGAAGTAGGCAAGCCGGCGGGAC  
>MED12\_HsgRNA301  
CGTGTACAGAAGTAGGCAAGCCGGCGGGAC  
>MED12\_HsgRNA302  
AGGATACAGCTGAGGCCAAAAACCAGGGGC  
>MED12\_HsgRNA303  
CTACTAGCCTGTGCCTGTGCATCGTGGCTG  
>MED12\_HsgRNA304  
CTACTAGCCTGTGCCTGTGCATCGTGGCTG  
>MED12\_HsgRNA305  
GTGGTAGGGGTCCGTACTCAGCATGGGAGC  
>MED12\_HsgRNA306  
GTGGTAGGGGTCCGTACTCAGCATGGGAGC  
>MED12\_HsgRNA307  
CTGCTAGTTGGGGGCTGAGGAGCAGGGGTG



>MED12\_HsgRNA308  
CCTCTATCACAGAACTTGGACCAGTGGACC  
>MED12\_HsgRNA309  
CCTCTATCACAGAACTTGGACCAGTGGACC  
>MED12\_HsgRNA310  
GTGCTATGGTGGTAGCCAAGCTCCTGGAGA  
>MED12\_HsgRNA311  
GTGCTATGGTGGTAGCCAAGCTCCTGGAGA  
>MED12\_HsgRNA312  
TAGTTCACCAGCATTAAAGGAGTGAAGGGAT  
>MED12\_HsgRNA313  
TAGTTCACCAGCATTAAAGGAGTGAAGGGAT  
>MED12\_HsgRNA314  
CAAGTCACTGAGTGCAGAATGGCTAGGAGT  
>MED12\_HsgRNA315  
CAAGTCACTGAGTGCAGAATGGCTAGGAGT  
>MED12\_HsgRNA316  
AGAATCAGAAGCCGCAGATGAGAAGGGTTC  
>MED12\_HsgRNA317  
AGAATCAGAAGCCGCAGATGAGAAGGGTTC  
>MED12\_HsgRNA318  
GCTGTCAGCTGCAAGCGTTCTGGTCGGCAT  
>MED12\_HsgRNA319  
GCTGTCAGCTGCAAGCGTTCTGGTCGGCAT  
>MED12\_HsgRNA320  
TGGGTCATCGGCAGGATCATCAAAGGGAGA  
>MED12\_HsgRNA321  
GGGCTCCAAAGGCAAGGTCCCCTCGGGAGA  
>MED12\_HsgRNA322  
GGGCTCCAAAGGCAAGGTCCCCTCGGGAGA  
>MED12\_HsgRNA323  
CCCGTCCAACCTGCCCATGCCAGAGGGTAA  
>MED12\_HsgRNA324  
CCCGTCCAACCTGCCCATGCCAGAGGGTAA  
>MED12\_HsgRNA325  
TGCTCCAGAACCGCATCGTGGATGGAGC  
>MED12\_HsgRNA326  
TGCTCCAGAACCGCATCGTGGATGGAGC  
>MED12\_HsgRNA327  
GCCTTCCCCAGACAAGCCTACAGTAGGAAT  
>MED12\_HsgRNA328  
ACCCTCTGGCATGGGCAGGTTGGACGGGGC  
>MED12\_HsgRNA329  
ACCCTCTGGCATGGGCAGGTTGGACGGGGC

>MED12\_HsgRNA330  
TTGTTCTGTCATCTTGCAGCGTTGTGGAGA  
>MED12\_HsgRNA331  
TTGTTCTGTCATCTTGCAGCGTTGTGGAGA  
>MED12\_HsgRNA332  
TCCTTCTTACTGAAAATGGGGACCTGGATG  
>MED12\_HsgRNA333  
GTCTTGAAAAGGTGAAGGAGGATGCGGCAG  
>MED12\_HsgRNA334  
GTCTTGAAAAGGTGAAGGAGGATGCGGCAG  
>MED12\_HsgRNA335  
GTAGTGAACAGGACTCTGAGCCAGGGGCC  
>MED12\_HsgRNA336  
GTAGTGAACAGGACTCTGAGCCAGGGGCC  
>MED12\_HsgRNA337  
GGATTGAGCTGCGGTGTCTTGAAAAGGTGA  
>MED12\_HsgRNA338  
AGGCTGAGCTGCTTCTCAAATCCTCGGATC  
>MED12\_HsgRNA339  
AGGCTGAGCTGCTTCTCAAATCCTCGGATC  
>MED12\_HsgRNA340  
TGGCTGCCTCCCAGAACCGCATCGTGGATG  
>MED12\_HsgRNA341  
TGGCTGCCTCCCAGAACCGCATCGTGGATG  
>MED12\_HsgRNA342  
TTGCTGCTCTACCACACACACCTGAGGCC  
>MED12\_HsgRNA343  
CTGATGCTGAGTGAATATTCCATGAGGTCC  
>MED12\_HsgRNA344  
CTGATGCTGAGTGAATATTCCATGAGGTCC  
>MED12\_HsgRNA345  
AAGGTGCTGGGAATAGTACCTGGGGGATG  
>MED12\_HsgRNA346  
AAGGTGCTGGGAATAGTACCTGGGGGATG  
>MED12\_HsgRNA347  
CCATTGGACGGGTACTTCATACTTTGGAAG  
>MED12\_HsgRNA348  
CCTCTGGCATGGGCAGGTTGGACGGGGCAA  
>MED12\_HsgRNA349  
CCTCTGGCATGGGCAGGTTGGACGGGGCAA  
>MED12\_HsgRNA350  
TTTTTGGCCTCAGCTGTATCCTACAGGTAG  
>MED12\_HsgRNA351  
TTTTTGGCCTCAGCTGTATCCTACAGGTAG

>MED12\_HsgRNA352  
 AAAATGGGAGCACTGGGAGCAGAAAGGGAG  
 >MED12\_HsgRNA353  
 AAAATGGGAGCACTGGGAGCAGAAAGGGAG  
 >MED12\_HsgRNA354  
 GTTCTGGTCGGCATCGTGCTATGGTGGTAG  
 >MED12\_HsgRNA355  
 GTTCTGGTCGGCATCGTGCTATGGTGGTAG  
 >MED12\_HsgRNA356  
 TGCCTGTGCATCGTGGCTGTCCGCGGCAC  
 >MED12\_HsgRNA357  
 TGCCTGTGCATCGTGGCTGTCCGCGGCAC  
 >MED12\_HsgRNA358  
 CCCTTTAGCAGAGTCAGGGCATGTTGGGAC  
 >MED12\_HsgRNA359  
 CACATTATGACCAACACCAGGTCACGGCTC  
 >MED12\_HsgRNA360  
 CACATTATGACCAACACCAGGTCACGGCTC  
 >MED12\_HsgRNA361  
 ACCTTTCACATTATGACCAACACCAGGTCA  
 >MED12\_HsgRNA362  
 ACCTTTCACATTATGACCAACACCAGGTCA  
 >MED12\_HsgRNA363  
 AGCGTTCTGGTCGGCATCGTGCTATGGTGG  
 >MED12\_HsgRNA364  
 AGCGTTCTGGTCGGCATCGTGCTATGGTGG  
 >MED12\_HsgRNA365  
 ATACTTGCACCTCATCTCCCGAGGGGACC  
 >MED12\_HsgRNA366  
 ATACTTGCACCTCATCTCCCGAGGGGACC  
 >MED12\_HsgRNA367  
 CCCTTTGTAACCGAATCTTTGGATTGGGAC  
 >MED12\_HsgRNA368  
 CCCTTTGTAACCGAATCTTTGGATTGGGAC  
 >MED12\_HsgRNA369  
 ACTTTTGTTGCCATCCTCATCGCTCGGCAG  
 >MED12\_HsgRNA370  
 ACTTTTGTTGCCATCCTCATCGCTCGGCAG

(6)  $S_6^+$ : 38 high on-target activity sgRNAs targeting TADA2B

>TADA2B\_HsgRNA1  
 CGTGACAGACCACACCTGTCCCAGCGGAGG  
 >TADA2B\_HsgRNA2  
 CATTACGTGAGCATGTACATCCACGGGAAC

>TADA2B\_HsgRNA3  
CTGGAGATCCAGCCGCTTTCTGTGAGGAAA  
>TADA2B\_HsgRNA4  
GCTCAGCCACAGAGATGTCCAGCGGGGGCA  
>TADA2B\_HsgRNA5  
CGGAAGCTGAAAGAGAGACAGCGGCGGAAG  
>TADA2B\_HsgRNA6  
GGGGAGTCCGGGAAGCACCAACGTGGGCAG  
>TADA2B\_HsgRNA7  
TAATAGTCTTCACAGTCACGTAGCGGGCTG  
>TADA2B\_HsgRNA8  
TGCTCAGCCACAGAGATGTCCAGCGGGGGC  
>TADA2B\_HsgRNA9  
CTTGCATGACATGAACTGGTACAGCGGCCT  
>TADA2B\_HsgRNA10  
CGGGCCAAGATCCGAGAAGTGCAGCGGTAC  
>TADA2B\_HsgRNA11  
CGCGCCCACGTGGACATGTACGTGCGGAAG  
>TADA2B\_HsgRNA12  
GCTTCCGCACGTACATGTCCACGTGGGCGC  
>TADA2B\_HsgRNA13  
AGTACTGCGTGTACTGCCTGGCCGAGGTGA  
>TADA2B\_HsgRNA14  
GCTGCTGGACGCCATCGAGCAGTTCGGCTT  
>TADA2B\_HsgRNA15  
GGCGCTTCACGCTCTGGGGGCCCGAGGCCG  
>TADA2B\_HsgRNA16  
AGCGGAAGCGCAGCGGGCTCACCTCGGCCA  
>TADA2B\_HsgRNA17  
CTGGGACAGGTGTGGTCTGTACGCGGTTG  
>TADA2B\_HsgRNA18  
CAGAGAGCCCGCTGATGAGCGTCTCGGCAT  
>TADA2B\_HsgRNA19  
AAGCGCAGCGGGCTCACCTCGGCCAGGCAG  
>TADA2B\_HsgRNA20  
TCGAGCAGTTCGGCTTCGGAAACTGGGTGA  
>TADA2B\_HsgRNA21  
CGCTGCAGTTCTCGGATCTTGGCCCGGAGC  
>TADA2B\_HsgRNA22  
CTCAGCCACAGAGATGTCCAGCGGGGGCAG  
>TADA2B\_HsgRNA23  
GGTAGCGGCGGTGGTGGCCGATCTCGGCGC  
>TADA2B\_HsgRNA24  
CACGGCTACCAGCTGGTGGACGGCGGGCGC

>TADA2B\_HsgRNA25  
 GTGCGGAAGCTGAAAGAGAGACAGCGGCGG  
 >TADA2B\_HsgRNA26  
 CGGGGCAGCGGGGTGGTGTAGGCTGGGTGA  
 >TADA2B\_HsgRNA27  
 CTCTGTGGCTGAGCAGCAGCAGCTGGGCTA  
 >TADA2B\_HsgRNA28  
 CACGTAATGCTCCATCACCTCTTGGGGAGT  
 >TADA2B\_HsgRNA29  
 GCATTACGTGAGCATGTACATCCACGGGAA  
 >TADA2B\_HsgRNA30  
 AGTTTCCGAAGCCGAAGTCTCGATGGCGT  
 >TADA2B\_HsgRNA31  
 AGCTTCCGCACGTACATGTCCACGTGGGCG  
 >TADA2B\_HsgRNA32  
 GCACTCGGTGCAGCGGAAGCGCAGCGGGCT  
 >TADA2B\_HsgRNA33  
 TTGGTGCTTCCCGACTCCCCAAGAGGTGA  
 >TADA2B\_HsgRNA34  
 AGGCTGGCACCAGATTGTAGTCACGGGCGA  
 >TADA2B\_HsgRNA35  
 AGCATGTACATCCACGGGAACCTGGGGAAG  
 >TADA2B\_HsgRNA36  
 TCGATGTCCTGGCACTCGGTGCAGCGGAAG  
 >TADA2B\_HsgRNA37  
 AGTCTTACAGTCACGTAGCGGGCTGGACT  
 >TADA2B\_HsgRNA38  
 GCCCTTTGTCATCGTAGGAAGATATGGCTG

(7)  $S_7^+$ : 22 high on-target activity sgRNAs targeting TADA1

>TADA1\_HsgRNA1  
 AGACAACAGCTGAAACAGCCTCCTCGGTGA  
 >TADA1\_HsgRNA2  
 TGACAACGCGTGAGAATGGCCAGGAGGAAA  
 >TADA1\_HsgRNA3  
 CAAGAAGAACTTAAGCGAGGCCCTGGGGGA  
 >TADA1\_HsgRNA4  
 CCAAAAATCTGACAACGCGTGAGAATGGCCA  
 >TADA1\_HsgRNA5  
 AGATACTGGGCTAACCTAAAGCTGTGGTTC  
 >TADA1\_HsgRNA6  
 TCTTACTGTTTCACGTTGTCCCCAGGGCC  
 >TADA1\_HsgRNA7  
 AAGAAGAACTTAAGCGAGGCCCTGGGGGAC

>TADA1\_HsgRNA8  
 GTTAAGAGCATAGACAGTATGTGTAGGGAT  
 >TADA1\_HsgRNA9  
 TTTTCAGCTGTTGTCTATGCTGTGGAGGTTG  
 >TADA1\_HsgRNA10  
 AATGATAGTACTGCTTATGAGCATGGGCT  
 >TADA1\_HsgRNA11  
 GGTTC AAGCAGAAGATCAGCAAAGAGGAGT  
 >TADA1\_HsgRNA12  
 CTTACTGTTTCACGTTGTCCCCAGGGCCT  
 >TADA1\_HsgRNA13  
 AGAAGA ACTTAAGCGAGGCCCTGGGGGACA  
 >TADA1\_HsgRNA14  
 CCAAGAAGAACTTAAGCGAGGCCCTGGGGG  
 >TADA1\_HsgRNA15  
 CCTCGAGTGGGAAGCATCATTGTGTGGGAA  
 >TADA1\_HsgRNA16  
 TAGGGATGACTTCCCTGTGCACCTGGGATT  
 >TADA1\_HsgRNA17  
 AGGCGCCAAGAAGAACTTAAGCGAGGCC  
 >TADA1\_HsgRNA18  
 CAATGGCGACCTTTGTGAGCGAGCTGGAGG  
 >TADA1\_HsgRNA19  
 ATGATAGTACTGCTTATGAGCATGGGCTG  
 >TADA1\_HsgRNA20  
 AGCATGGGCTGGACAATGTCACCGAGGAGG  
 >TADA1\_HsgRNA21  
 CTGTTTCAGCTGTTGTCTATGCTGTGGAGG  
 >TADA1\_HsgRNA22  
 TCCATTCTCACAATGATTTCCCTCCTGGCCA

(8)  $S_g^+$ : 13 high on-target activity sgRNAs targeting HPRT1

>HPRT1\_HsgRNA1  
 TTATAGCCCCCTTGAGCACACAGAGGGCT  
 >HPRT1\_HsgRNA2  
 TTGTAGCCCTCTGTGTGCTCAAGGGGGGCT  
 >HPRT1\_HsgRNA3  
 GCCGAGCTGCTCACCACGACGCCAGGGCTG  
 >HPRT1\_HsgRNA4  
 AATCATTATGCTGAGGATTTGGAAAGGGTG  
 >HPRT1\_HsgRNA5  
 TGGTCAGGCAGTATAATCCAAAGATGGTCA  
 >HPRT1\_HsgRNA6  
 TTAAGTAGAATGACCAGTCAACAGGGGACA

>HPRT1\_HsgRNA7  
 TTTGGAAAGGGTGTATTATTCTCATGGACT  
 >HPRT1\_HsgRNA8  
 TGGCGACCCGCAGCCCTGGCGTCGTGGTGA  
 >HPRT1\_HsgRNA9  
 TATAGCCCCCTTGAGCACACAGAGGGCTA  
 >HPRT1\_HsgRNA10  
 TGTAGCCCTCTGTGTGCTCAAGGGGGGCTA  
 >HPRT1\_HsgRNA11  
 GGCAGTATAATCCAAAGATGGTCAAGGTCG  
 >HPRT1\_HsgRNA12  
 CTCCGTTATGGCGACCCGCAGCCCTGGCGT  
 >HPRT1\_HsgRNA13  
 TTGCTCGAGATGTGATGAAGGAGATGGGAG

(9)  $S_9^+$ : 31 high on-target activity sgRNAs targeting CUL3

>CUL3\_HsgRNA1  
 TCAAAAAGCATGTCTTGGTGCTGGTGGGATG  
 >CUL3\_HsgRNA2  
 AAACAAGGTGAATCCGACCCAGAGAGGAAA  
 >CUL3\_HsgRNA3  
 GCACAAGTAACTGGCTCTAATACACGGAAG  
 >CUL3\_HsgRNA4  
 GGCCAATATCCTGTCTGTGAGCACCCGGACT  
 >CUL3\_HsgRNA5  
 TCAAACACAACGATGGATGAATTCAGGCAA  
 >CUL3\_HsgRNA6  
 TCTTACAGTCCGGGTGCTCACGACAGGATA  
 >CUL3\_HsgRNA7  
 GTTTACCACAGGCGAGGGACTGTAGGGCTC  
 >CUL3\_HsgRNA8  
 GATAAGCTGAAAAAGGGAGTCAAAGGGGTA  
 >CUL3\_HsgRNA9  
 CTAAATAACTTGTACATGCAACCAAGGTCT  
 >CUL3\_HsgRNA10  
 GAACCAATTGTAAAGGTGGTTGAAAGGGAA  
 >CUL3\_HsgRNA11  
 GAAACAGGAAGATGGATCTGAAGTTGGTGT  
 >CUL3\_HsgRNA12  
 ACGCCGAGGAGAGACTCACCCGAAAGGCC  
 >CUL3\_HsgRNA13  
 AGGGCTCTAACAAGCTCTCTTTCAGGGATA  
 >CUL3\_HsgRNA14  
 TTTACTTACCTGGATATAGTCAACAGGATT

>CUL3\_HsgRNA15  
 TGCAC TTTGGTGTGGCTGACTGAGTGGGCC  
 >CUL3\_HsgRNA16  
 ATATGAGCATCTCAAACACAACGATGGATG  
 >CUL3\_HsgRNA17  
 TGATGCACTGCCTTGACAAATCAACGGAAG  
 >CUL3\_HsgRNA18  
 TAGAGCCCTACAGTCCCTCGCCTGTGGTAA  
 >CUL3\_HsgRNA19  
 GTCCGGGTGCTCACGACAGGATATTGGCCC  
 >CUL3\_HsgRNA20  
 TATGGGTGTATTAGGGATCATCTACGGCAA  
 >CUL3\_HsgRNA21  
 TGATTAGAGACATACTAATGTACATGGTAA  
 >CUL3\_HsgRNA22  
 AGCTTATCATCAATAAATAATGAGAGGTAT  
 >CUL3\_HsgRNA23  
 ATAATGAGAGGTATTCAGGAGACCTGGAGT  
 >CUL3\_HsgRNA24  
 GCTGTGTTGGTTTACCACAGGCGAGGGACT  
 >CUL3\_HsgRNA25  
 TTTTTTAGGTA ACTCAGCAGTTGAAGGCGC  
 >CUL3\_HsgRNA26  
 AAGGTTCTACTTAGCCAAACACAGTGGTCG  
 >CUL3\_HsgRNA27  
 TCTCTTGGATATTACAGATGACCATGGATG  
 >CUL3\_HsgRNA28  
 CCTTTTTAACTGGTCCATAAAAATGTGGCAT  
 >CUL3\_HsgRNA29  
 CTGTTTTACATAGGTATCTTTAGGTGGTGT  
 >CUL3\_HsgRNA30  
 TGTTTTTCCTCCACAGACTGAATGTGGATG  
 >CUL3\_HsgRNA31  
 GCACTTTGGTGTGGCTGACTGAGTGGGCCA

(10)  $S_{10}^+$ : 148 high on-target activity sgRNAs targeting NF1

>NF1\_HsgRNA1  
 TTTTAAAAAACCTACCGTAAACTCGGGTCA  
 >NF1\_HsgRNA2  
 TTTAAAACAGACTTTCTCTCTAAGTGGTTT  
 >NF1\_HsgRNA3  
 ATGCAAAGCCATATGAAATTGTAGTGGACC  
 >NF1\_HsgRNA4  
 TGCAAAATTAAAACGACTCCTGAAGGGTAA



>NF1\_HsgRNA5  
CACAAACCTGTGGCAGATACACACTGGTCC  
>NF1\_HsgRNA6  
CTTCAAGCCCCTTTCGATTCTAGGTGGTGG  
>NF1\_HsgRNA7  
TTCGAAGTTGAGGGGGGAATTCTGAGGAGG  
>NF1\_HsgRNA8  
GTTAAATAGCATTGGATACAGAGCAGGACT  
>NF1\_HsgRNA9  
GCTCAATATCGCATTACTTAATTTAGGCAG  
>NF1\_HsgRNA10  
AGTAAATCCACTTACCTATAGGAAGGGTCA  
>NF1\_HsgRNA11  
TGGCACACACTTCGAAGTTGAGGGGGGAAT  
>NF1\_HsgRNA12  
AGTCACACATGCCAGAGATTGCTCAGGAAG  
>NF1\_HsgRNA13  
AGTTACAGTTATAGATATAGACTGCGGAGA  
>NF1\_HsgRNA14  
AGGTACATGAAAAAGAAGAATTC AAGGCTT  
>NF1\_HsgRNA15  
ACGGACCAATGTTAAGGATCTGGTGGTCT  
>NF1\_HsgRNA16  
TCCTACTGCACCGATGCTGTTCTGAGGGAA  
>NF1\_HsgRNA17  
ATACACTGGAAAAATGTCTTGCTGGGGTAA  
>NF1\_HsgRNA18  
AGATACTTATAGCTTCTTGCTCTCCAGGTCT  
>NF1\_HsgRNA19  
CTGAACTTCGGAATTCTGCCTCTGGGGTTT  
>NF1\_HsgRNA20  
ACTAAGAAAGTAACAACGTGGAAGAGGTAG  
>NF1\_HsgRNA21  
GGTTAGAACCATCAGAGAGCCTTGAGGAAA  
>NF1\_HsgRNA22  
TGCCAGAGATTGCTCAGGAAGCAATGGAGG  
>NF1\_HsgRNA23  
TCAGAGAGCCTTGAGGAAAACCAGCGGAAC  
>NF1\_HsgRNA24  
TACCAGCACATAGTGAAATGTAGAAGGTGA  
>NF1\_HsgRNA25  
GAGCAGCACTTCAGAAAAGAGTGATGGCAC  
>NF1\_HsgRNA26  
CAAAAGCCAAAATGGAAGATGGCCAGGTAA

>NF1\_HsgRNA27  
AAAAAGCCACCACCTAGAATCGAAAGGGGC  
>NF1\_HsgRNA28  
TCTGAGGAGGAACTGATGATGGCATGGAAG  
>NF1\_HsgRNA29  
AGAAAAGTAACAACGTGGAAGAGGTAGGGAA  
>NF1\_HsgRNA30  
CCAAAAGTCAGTACTGAGCACAAACAAGGAAT  
>NF1\_HsgRNA31  
GGACAGTCTACGAAAAGCTCTTGCTGGCCA  
>NF1\_HsgRNA32  
TTGCAGTGCCACTCCAGAGGATTCGGATT  
>NF1\_HsgRNA33  
GACCAGTGGACAGAAGCTAGCTCAAAGGTAT  
>NF1\_HsgRNA34  
TCAAAGTTTGAGGAATTTATGACTAGGTAA  
>NF1\_HsgRNA35  
CAAGATAAGGAGAATGATTTGTAGTGGCCA  
>NF1\_HsgRNA36  
CCAGATCCCACAGACTGATATGGCTGGTAA  
>NF1\_HsgRNA37  
AGCAATCTCTGGCATGTGTGACTGAGGGAC  
>NF1\_HsgRNA38  
GGATATGAATGATAGACTGGACAATGGCTT  
>NF1\_HsgRNA39  
ACCAATGCTCTCACCTTAAAGTGTGGTTG  
>NF1\_HsgRNA40  
TGATATTAATGACCAGTCCATGTGTGGAAG  
>NF1\_HsgRNA41  
CCACATTAGGCTTAGGTTACCACAAGGATC  
>NF1\_HsgRNA42  
CAAGATTCGGCCAAAAGATGTCCCTGGGAC  
>NF1\_HsgRNA43  
CAGGATTGATAAATCTGAGGAACATGGCAC  
>NF1\_HsgRNA44  
CTCCATTGCTTCCTGAGCAATCTCTGGCAT  
>NF1\_HsgRNA45  
TAGAATTGTTACAGTATATCAATGTGGATT  
>NF1\_HsgRNA46  
CTACCAAGCTGGGACTTCCAAAAGCTGGGAA  
>NF1\_HsgRNA47  
GTGACAATACACAGCATCAATCTTAGGCCA  
>NF1\_HsgRNA48  
CTGCCACATCAAGGGAATTGTTGAAGGACA

>NF1\_HsgRNA49  
CCTACAGGAATGGATCAACATGACTGGCTT  
>NF1\_HsgRNA50  
CGCACAGGCCGGTGGAAATGGGTCCAGGCCG  
>NF1\_HsgRNA51  
CAGTCATGTTGATCCATTCTGTAGGGAGT  
>NF1\_HsgRNA52  
ACACCCAAAGACAACAAGAGCTCTTGGTTG  
>NF1\_HsgRNA53  
AAAGCCACCACCTAGAATCGAAAGGGGCTT  
>NF1\_HsgRNA54  
TCAACCACCATGGACTGAACAAGTAGGAAA  
>NF1\_HsgRNA55  
TCAACCACGTCTTTGGATATATCTTGGATT  
>NF1\_HsgRNA56  
CAATCCATGGAATTGTGCAGAGTGTGGTGT  
>NF1\_HsgRNA57  
TTTTCTACTTGTTCAGTCCATGGTGGTTG  
>NF1\_HsgRNA58  
TGGCCGCGCACAGGCCGGTGGAAATGGGTCC  
>NF1\_HsgRNA59  
TGAGCGCGGTGCCCTGGTTTGCAATGGTTA  
>NF1\_HsgRNA60  
GAGTCGGGCTGTGACAGTTCCCAGCGGGTC  
>NF1\_HsgRNA61  
GTGGCTACTAAGAAAGTAACAACGTGGAAG  
>NF1\_HsgRNA62  
CCTGCTCGTCGAAGCGGCTGACCACGGCCT  
>NF1\_HsgRNA63  
TCGCCTCTGCACAAAGCCCTCTTTTGGGTA  
>NF1\_HsgRNA64  
AGTTCTGACAAAAATCCTTCAACAAGGCAC  
>NF1\_HsgRNA65  
TGGTCTGGCCGACAGTTGGATAGGTGGCTG  
>NF1\_HsgRNA66  
TGTCTGTTTCCGCCACCTCTGTGAGGAAG  
>NF1\_HsgRNA67  
CAATCTTAGGCCACCAATCCAATGCGGACT  
>NF1\_HsgRNA68  
CACTCTTCCAAAAATTCTAACGTGAGGTGT  
>NF1\_HsgRNA69  
ATAGCTTCTTGTCTCCAGGTCTGTAGGTTT  
>NF1\_HsgRNA70  
TTATCTTGTGTCCAGAAATAATCCAGGATA

>NF1\_HsgRNA71  
AACAGAAACTACCTGCTGCCACCTTGGCTT  
>NF1\_HsgRNA72  
TTCAGAACCTTTGGGAGAGGACCATGGCTG  
>NF1\_HsgRNA73  
TAGGGAAGATGAGCTGCCACATCAAGGGAA  
>NF1\_HsgRNA74  
GTAGGACAATCAGATGCTATATCAAGGAAA  
>NF1\_HsgRNA75  
CAATGAGATTAGATGAAACGATGCTGGTCA  
>NF1\_HsgRNA76  
TTGTGAGCTAGCTTGAGAGCATTGTGGAAT  
>NF1\_HsgRNA77  
CACAGAGGTGGCGGAAACAGGACATGGCAA  
>NF1\_HsgRNA78  
CATGGAGTCATGTATTCCAAACAAAGGTGT  
>NF1\_HsgRNA79  
CAGAGATTGCTCAGGAAGCAATGGAGGTAA  
>NF1\_HsgRNA80  
CCTTGCAGCCACCTATCCAACCTGTCGGCCA  
>NF1\_HsgRNA81  
TTAGGCAGTTCTGACCCGAGTTTACGGTAG  
>NF1\_HsgRNA82  
GCGTGCCTGGTTTGCAATGGTTAAGGTGA  
>NF1\_HsgRNA83  
TTTGGCCGAATCTTGGTGTGTTGGGGGATA  
>NF1\_HsgRNA84  
TATGGCTTTAAAGTCAGTAAGACATGGTAT  
>NF1\_HsgRNA85  
GTGAGGAAGCAGATATCCGGTGTGGGGTGG  
>NF1\_HsgRNA86  
GACTGGACAATGGCTTCACACTCCTGGTGC  
>NF1\_HsgRNA87  
CATGGGACATTCGCCTCTTAACAATGGTCT  
>NF1\_HsgRNA88  
TACAGGGCCACTTCTAGTTTGGTCTGGGCT  
>NF1\_HsgRNA89  
AGTCGGGCTGTGACAGTTCCCAGCGGGTCC  
>NF1\_HsgRNA90  
AAAGGGGCTTGAAGTTAATGTCAAAGGTGA  
>NF1\_HsgRNA91  
AGATGGTAGAATACCTGACAGACTGGGTTA  
>NF1\_HsgRNA92  
GATTGGTGGAACTGGTCACAATGATGGGTG

>NF1\_HsgRNA93  
TCAGGGTTCCACAGAAACATGTACAGGGCC  
>NF1\_HsgRNA94  
GAAAGTAACAACGTGGAAGAGGTAGGGAAG  
>NF1\_HsgRNA95  
GGCAGTACAGCAGAATTAATTACAGGGCTC  
>NF1\_HsgRNA96  
GGCTGTGACAGTCCCAGCGGGTCCGGATA  
>NF1\_HsgRNA97  
ATTGGTGGAAGTGGTCACAATGATGGGTGA  
>NF1\_HsgRNA98  
AATGGTGTGTAACCATGAGAAAGTGGGACT  
>NF1\_HsgRNA99  
CTTGGTGTGTTGGGGGATAGAGTCGGGCTG  
>NF1\_HsgRNA100  
CAGGGTTCCACAGAAACATGTACAGGGCCA  
>NF1\_HsgRNA101  
CCTTGTGTGCTCAGTACTGACTTTGGTAT  
>NF1\_HsgRNA102  
CTTTGTTTGAATACATGACTCCATGGCTG  
>NF1\_HsgRNA103  
AATTTAAAGAAAAACCTACAGACCTGGAGA  
>NF1\_HsgRNA104  
TCTATAACTGTAACCTCCTGGGTCAGGGAGT  
>NF1\_HsgRNA105  
GTGCTACCTATCTACAAAAACTCCTGGATC  
>NF1\_HsgRNA106  
ATGTTACCTTAAGATCAACCACCATGGACT  
>NF1\_HsgRNA107  
GTCTTACTAATAGAGACAATAAAGAGGGTG  
>NF1\_HsgRNA108  
CCCTTAGAGCTTCCACACATGGACTGGTCA  
>NF1\_HsgRNA109  
TACGTAGTAATTCTTCATGATCCATGGACA  
>NF1\_HsgRNA110  
ATTGTAGTGGACCTTACCCATACCGGGCCT  
>NF1\_HsgRNA111  
TCTATATCTATAACTGTAACCTCCTGGGTCA  
>NF1\_HsgRNA112  
TGTGTCAATTAGTTGAAGTAATGATGGCAA  
>NF1\_HsgRNA113  
TGCTTCATACGGTGAGACAATGGCAGGATT  
>NF1\_HsgRNA114  
TCTATCATTCATATCCGGACCCGCTGGGAA

>NF1\_HsgRNA115  
AGACTCCATGCAGACTCTCTTCCGAGGCAA  
>NF1\_HsgRNA116  
GAATTCCGAAGTTCAGCTGCATGCTGGTTT  
>NF1\_HsgRNA117  
CGGGTCCGGATATGAATGATAGACTGGACA  
>NF1\_HsgRNA118  
GAATTCGTTGATCAAACATCATCTGTGGTAT  
>NF1\_HsgRNA119  
CTCTTCTAAAGCCAAGGTGGCAGCAGGTAG  
>NF1\_HsgRNA120  
CCCATCTATTCAAGCAAAAATATGGGGAAG  
>NF1\_HsgRNA121  
AAGGTGAACTGGTTCTCATCTACTAGGCAG  
>NF1\_HsgRNA122  
TGCATGAAGGTGAGCGGCGTGCCCTGGTTT  
>NF1\_HsgRNA123  
CTGTTGACATCATATTGCTGACAGAGGCAA  
>NF1\_HsgRNA124  
TGGCTGATCGGTTTGAGAGATTGGTGAAC  
>NF1\_HsgRNA125  
AATGTGCAGAAAAGCTATTTGACTTGGTGG  
>NF1\_HsgRNA126  
TTTTTGCATCTTGGCAGGCTACACTGGTAA  
>NF1\_HsgRNA127  
CGATTGCTAGGCCCGGTATGGGTAAGTCC  
>NF1\_HsgRNA128  
ACAATGGCAGGATTGATAAATCTGAGGAAC  
>NF1\_HsgRNA129  
GAAGTGGCCCTGTACATGTTTCTGTGGAAC  
>NF1\_HsgRNA130  
AAGATGGTAGAATACCTGACAGACTGGGTT  
>NF1\_HsgRNA131  
CCAATGTGGTTCCTTGTCTCAGTGGGTAA  
>NF1\_HsgRNA132  
GGCATGTGTGACTGAGGGACCAGTTGGACG  
>NF1\_HsgRNA133  
GAAGTGTGTGCCACTGTTTATAACCAGGTAT  
>NF1\_HsgRNA134  
GGACTTACATTGGTGATGATTCGATGGAGT  
>NF1\_HsgRNA135  
ATCCTTACCAGCCATATCAGTCTGTGGGAT  
>NF1\_HsgRNA136  
TCATTTAGAAAGACTGATTGCCCTAGGACT

>NF1\_HsgRNA137  
 TGTATTAGCAAACGAGTGTCTCATGGGCAG  
 >NF1\_HsgRNA138  
 TGGATTATTTCTGGACACAAGATAAGGAGA  
 >NF1\_HsgRNA139  
 TGGCTTCACACTCCTGGTGCATGAAGGTGA  
 >NF1\_HsgRNA140  
 TTTGTTTCGCTCTGCTGAAGTTACTTGGACA  
 >NF1\_HsgRNA141  
 CACCTTCTACATTTCACTATGTGCTGGTAA  
 >NF1\_HsgRNA142  
 GCAGTTCTGACCCGAGTTTACGGTAGGTTT  
 >NF1\_HsgRNA143  
 GAAGTTGAGGGGGGAATTCTGAGGAGGAAC  
 >NF1\_HsgRNA144  
 TGGTTTGCAATGGTTAAGGTGAACTGGTTC  
 >NF1\_HsgRNA145  
 GTCATTGCCTTCCGTTCCAGTTACCGGGAC  
 >NF1\_HsgRNA146  
 TCTTTTGGCCGAATCTTGGTGTGTTGGGGG  
 >NF1\_HsgRNA147  
 TGGTTTGTCTACAAATTGAGTATTGGTAT  
 >NF1\_HsgRNA148  
 CTGTTTTAAAGCGATTGCTAGGCCCGGTATGGACGTGTTTCGGCCGGGGCGG

(11)  $S_{11}^+$ : 45 high on-target activity sgRNAs targeting NF2

>NF2\_HsgRNA1  
 ATGAAAAGATCTACTGCCCTCCTGAGGCTT  
 >NF2\_HsgRNA2  
 AAGCAACAATGGCCAACGAAGCACTGGTGA  
 >NF2\_HsgRNA3  
 AAGCAACCCAAGACGTTACCGTGAGGATC  
 >NF2\_HsgRNA4  
 TAAAAAGGGCACAGAGCTGCTGCTTGGAGT  
 >NF2\_HsgRNA5  
 GACTACGACCCCAAGTGTTCACAAGCGGGGA  
 >NF2\_HsgRNA6  
 AGGTACTGGATCATGATGTTTCAAAGGAAG  
 >NF2\_HsgRNA7  
 CCACAGATTCTCCAGCTATGTATCGGGAAC  
 >NF2\_HsgRNA8  
 GTTCAGCAGATGAAAGCCCAGGCCAGGGAG  
 >NF2\_HsgRNA9  
 TTCTAGCCTTCTCCTCCCTGGCCTGGGCTT

>NF2\_HsgRNA10  
AAAAATCCCCGCTTGTGAACACTGGGGTCG  
>NF2\_HsgRNA11  
GACGATCCTCACGGTGAACGTCTTGGGTTG  
>NF2\_HsgRNA12  
CGAGATGTTTCGGATTTCATTCCACGGGAA  
>NF2\_HsgRNA13  
TTTGATTGGTGTGCCGACTCTGGGGCTC  
>NF2\_HsgRNA14  
AGGCCACAGCGATTTCGCACGGAGGAGGAGA  
>NF2\_HsgRNA15  
GGCTCACCGGTACGTGGGCTTGGTGGCAA  
>NF2\_HsgRNA16  
CGTTCACCGTGAGGATCGTCACCATGGACG  
>NF2\_HsgRNA17  
GAAACATCTCGTACAGTGACAAGGAGGTAG  
>NF2\_HsgRNA18  
CATTCCACGGGAAGGAGATCTTGGGGGTCA  
>NF2\_HsgRNA19  
AGGACCTGCAGGAAGCACGCGAGGCGGAGC  
>NF2\_HsgRNA20  
ACGCCGAGATGGAGTTCAATTGCGAGGTAA  
>NF2\_HsgRNA21  
TGGCCTGGCTCAAAATGGACAAGAAGGTTG  
>NF2\_HsgRNA22  
AGGAGAAGCGCCTGATGGAGCAGAAGGTGC  
>NF2\_HsgRNA23  
TGACGATCCTCACGGTGAACGTCTTGGGTT  
>NF2\_HsgRNA24  
CTTTGATTGGTGTGCCGACTCTGGGGCT  
>NF2\_HsgRNA25  
AGAAGCCAGGAGCACAGAAGCCTCAGGAGG  
>NF2\_HsgRNA26  
ATCGGAACCATGATCTATTTATGAGGAGA  
>NF2\_HsgRNA27  
AAATGGAATATCTGAAGATAGCTCAGGACC  
>NF2\_HsgRNA28  
GCCAGGAGCACAGAAGCCTCAGGAGGGCAG  
>NF2\_HsgRNA29  
TGAGGGAGGAGGCTGAACGCACGAGGGATG  
>NF2\_HsgRNA30  
TCAGGGTCATAAATGTGAAGCCCCAGGGCA  
>NF2\_HsgRNA31  
TGCAGTACACAATCAAGGACACAGTGGCCT



>NF2\_HsgRNA32  
 CGGCGTCCATGGTGACGATCCTCACGGTGA  
 >NF2\_HsgRNA33  
 TTCTTACGCCGTCCAGGCCAAGGTAGGCTC  
 >NF2\_HsgRNA34  
 GCTGTCACCAATGAGGTTGAAGCTTGGTAT  
 >NF2\_HsgRNA35  
 TGTATCAGATGACTCCGGAAATGTGGGAGG  
 >NF2\_HsgRNA36  
 TCATTCCACGGGAAGGAGATCTTGGGGGTC  
 >NF2\_HsgRNA37  
 AGAGTCCGGCACACCAAATCAAAGAGGTCC  
 >NF2\_HsgRNA38  
 TTCTTCTTTGAGCCTACCTTGGCCTGGACG  
 >NF2\_HsgRNA39  
 TCTTTGAGCCTACCTTGGCCTGGACGGCGT  
 >NF2\_HsgRNA40  
 GTTTTGCCTCCTCCTCGGTGATCTGGGCCT  
 >NF2\_HsgRNA41  
 TCTTTGGACTGCAGTACACAATCAAGGACA  
 >NF2\_HsgRNA42  
 ATCTTGGGGGTCAGTCTGTTCTCAGGGTCA  
 >NF2\_HsgRNA43  
 GAGATGTTTCGGATTTTCATTCCACGGGAAG  
 >NF2\_HsgRNA44  
 AATTTTATCCTGAGAATGCTGAAGAGGAGC  
 >NF2\_HsgRNA45  
 CAGGTTTCTCGGAGCCCCAGAGTCCGGCAC

(12)  $S_{12}^+$ : 48 high on-target activity sgRNAs targeting CD5

>CD5\_HsgRNA1  
 CTTACACCAGCTTCTTGTAGACCAGAGGACC  
 >CD5\_HsgRNA2  
 CCACACTGCAGAGACTTACAGATGAGGTTC  
 >CD5\_HsgRNA3  
 AGAGACTTACAGATGAGGTTCCCAGGCC  
 >CD5\_HsgRNA4  
 GTGGAGATCCAGATGGAAAACAAGTGGAAA  
 >CD5\_HsgRNA5  
 ATCCAGGCCAAGACCCAAACCCAGCGGGCC  
 >CD5\_HsgRNA6  
 CTGTAGTGAGACACAGCTCCCGTTCGGGGC  
 >CD5\_HsgRNA7  
 TTGGATATAGACCACGGAGATCCTTGGCAG

>CD5\_HsgRNA8  
ACAGATGAGGTTCCCCAGGCCAGGGGCCT  
>CD5\_HsgRNA9  
GCCAATTCGATGGGAGGCCCGAACGGGAG  
>CD5\_HsgRNA10  
TGTTCAATGAAGGGAAAGGACCAAGGGCCA  
>CD5\_HsgRNA11  
AGGCCACCCCTTCCAGACTGTCCGAGGCAG  
>CD5\_HsgRNA12  
CACACACTGCTGCCCCGACCAGGCGGCTC  
>CD5\_HsgRNA13  
CCAGCAGCACCACCAGGAGTACAAGGGTCA  
>CD5\_HsgRNA14  
CACCCAGCGTCCCAGCAGGTATGTGGCAG  
>CD5\_HsgRNA15  
ATTGCAGCTGGTGCCAGGACACGAAGGCCT  
>CD5\_HsgRNA16  
AAAACAGTGTGCAGTTCCAGTTGGAGGCTG  
>CD5\_HsgRNA17  
CCTTCCGCTGAGCCTGATCTGCCTAGGTGG  
>CD5\_HsgRNA18  
CCCACCTAGGCAGATCAGGCTCAGCGGAAG  
>CD5\_HsgRNA19  
TCATCCTGACCCTTGTACTCCTGGTGGTGC  
>CD5\_HsgRNA20  
GTGGCGACCTCATCTCCTTCCACACGGTGG  
>CD5\_HsgRNA21  
TCCGCTGAGCCTGATCTGCCTAGGTGGGTG  
>CD5\_HsgRNA22  
GCTGCTGGCTGCCACATACCTGCTGGGAAC  
>CD5\_HsgRNA23  
TCTCCTGGGCACAGAGGAACCCGGGGGAGG  
>CD5\_HsgRNA24  
CACGGAGATCCTTGGCAGAAGACCTGGTTC  
>CD5\_HsgRNA25  
CTCAGATATCCAGGTGATGCTAAGTGGCTC  
>CD5\_HsgRNA26  
GTTTGCACACTGCAGAGGCCTGCTGGGCAT  
>CD5\_HsgRNA27  
TACAGCAGTGCTTCCAGAAAACAACGGCCC  
>CD5\_HsgRNA28  
TCCAGCCCAAGGTTTCAGAGCCGCCTGGTTCG  
>CD5\_HsgRNA29  
AACAGCTGAGATGTGGTGACCCCTTGGCCC

>CD5\_HsgRNA30  
 TGCTGCTGGCTGCCACATACCTGCTGGGAA  
 >CD5\_HsgRNA31  
 GAAGGGAAAGGACCAAGGGCCAAGGGGTCA  
 >CD5\_HsgRNA32  
 TCCTGGCACCAGCTGCAATCTGGGAGGAGC  
 >CD5\_HsgRNA33  
 CCTAGGCAGATCAGGCTCAGCGGAAGGCAC  
 >CD5\_HsgRNA34  
 AAGTGGCTCCAATTCCAAGTGCAGGGTCA  
 >CD5\_HsgRNA35  
 TGAAGGGAAAGGACCAAGGGCCAAGGGGTCA  
 >CD5\_HsgRNA36  
 CAGCGGGCCTGGCCCCAGGCACTGTGGCAA  
 >CD5\_HsgRNA37  
 GTCAGGGTCAAGTGGAGATCCAGATGGAAA  
 >CD5\_HsgRNA38  
 CTGGGGTCTGTTCAATGAAGGGAAAGGACC  
 >CD5\_HsgRNA39  
 CACAGGTGTGGTGAATTCTACAATGGCAG  
 >CD5\_HsgRNA40  
 TCTTGTAGACCAGAGGACCACACATGGCCA  
 >CD5\_HsgRNA41  
 GCCTGTCTTGGCCTTGTAGAGGATGGTGC  
 >CD5\_HsgRNA42  
 TGCAGTGTGCAAACAGCTGAGATGTGGTGA  
 >CD5\_HsgRNA43  
 CAGATCAGGCTCAGCGGAAGGCACTGGTCT  
 >CD5\_HsgRNA44  
 TGGTCTGCGGGTCTGTTCAATGAAGGGAAA  
 >CD5\_HsgRNA45  
 CAGGTCTTCTGCCAAGGATCTCCGTGGTCT  
 >CD5\_HsgRNA46  
 CCGCTGAGCCTGATCTGCCTAGGTGGGTGA  
 >CD5\_HsgRNA47  
 TATGTGGCAGCCAGCAGCACTTCGTGGGAG  
 >CD5\_HsgRNA48  
 GTTGTTCAGTTGGATATAGACCACGGAGA

(13)  $S_{13}^+$ : 15 high on-target activity sgRNAs targeting CD28

>CD28\_HsgRNA1  
 GACTACATGAACATGACTCCCCGGAGGCCT  
 >CD28\_HsgRNA2  
 CACGACCAGTGCCCAAAACAGCTTAGGAGA

>CD28\_HsgRNA3  
 CTCTCGTTGTCTAGGTAAGGCGGAGGGTAC  
 >CD28\_HsgRNA4  
 TTACCTAGACAACGAGAGGAGCAATGGAAC  
 >CD28\_HsgRNA5  
 GCTCCTCTCGTTGTCTAGGTAAGGCGGAGG  
 >CD28\_HsgRNA6  
 CAATGACACTCAGGCTGCTGTTCTTGGCTC  
 >CD28\_HsgRNA7  
 CCCTGCTTGTGGTAGATAGCAACGAGGTCA  
 >CD28\_HsgRNA8  
 CCTCGTTGCTATCTACCACAAGCAGGGGCG  
 >CD28\_HsgRNA9  
 GCCCTCATCAGAACAATGACACTCAGGCTG  
 >CD28\_HsgRNA10  
 GAACTCGGCATTCGAGCGAAACTGGGGCTG  
 >CD28\_HsgRNA11  
 TGATTGACGTGCAGATTCCAGAGACGGAAC  
 >CD28\_HsgRNA12  
 AGGTTGTAGGAATACCTGCAGCTGAGGCTG  
 >CD28\_HsgRNA13  
 GGAATTCGGGCATCCCTGTACAAGGGCGT  
 >CD28\_HsgRNA14  
 CAACTTCTTCTCAGTTCAAGTAACAGGTAA  
 >CD28\_HsgRNA15  
 CTCGTTGCTATCTACCACAAGCAGGGGCGA

(14)  $S_{14}^+$ : 34 high on-target activity sgRNAs targeting H2-K

>H2-K\_HsgRNA1  
 GCGGAGAATCCGAGATATGAGCCGCGGGCG  
 >H2-K\_HsgRNA2  
 AAGCAGAGAGACTCAGGGCCTACCTGGAGG  
 >H2-K\_HsgRNA3  
 CACCAGCCTGCTCCCACTTGTGTTTGGTGA  
 >H2-K\_HsgRNA4  
 TCGTAGGCGTACTGCTGGTACCCGCGGAGG  
 >H2-K\_HsgRNA5  
 CAGGAGGGGCCCCGAGTATTGGGAGCGGGAG  
 >H2-K\_HsgRNA6  
 AGGGCAATGAGCAGAGTTTCCGAGTGGACC  
 >H2-K\_HsgRNA7  
 CCACCACAGATGCCCACTTCTGGAAGGTTC  
 >H2-K\_HsgRNA8  
 TGATCACCAAACACAAGTGGGAGCAGGCTG

>H2-K\_HsgRNA9  
ACTTCCATGTACCGGGGCTCCCCGAGGCCG  
>H2-K\_HsgRNA10  
GTGACGAAATACCTCAGCGAGTGTGGGCCT  
>H2-K\_HsgRNA11  
TGAACGAAGACCTGAAAACGTGGACGGCGG  
>H2-K\_HsgRNA12  
GCGGCGCTGATCACCAAACACAAGTGGGAG  
>H2-K\_HsgRNA13  
CTCCCGGCCCGTACTCACCCGCGCGGGTC  
>H2-K\_HsgRNA14  
TAGGCGTACTGCTGGTACCCGCGGAGGAGT  
>H2-K\_HsgRNA15  
TCCACGTAGCCGACTTCCATGTACCGGGGC  
>H2-K\_HsgRNA16  
AGACCTGAAGATAAAGTCACCCTGAGGTGC  
>H2-K\_HsgRNA17  
TGCTCTGGTTGTAGTAGCCGAGCAGGGTCC  
>H2-K\_HsgRNA18  
AAATCTTCCACACAGATTCCCCAAAGGCC  
>H2-K\_HsgRNA19  
CTCGGAAACTCTGCTCATTGCCCTTGGCTT  
>H2-K\_HsgRNA20  
CAGAGAGACTCAGGGCCTACCTGGAGGGCA  
>H2-K\_HsgRNA21  
CCGAGATATGAGCCGCGGGCGGGTGGATG  
>H2-K\_HsgRNA22  
CCGAGCAGGGTCCTCAGGTCCACTCGGAAA  
>H2-K\_HsgRNA23  
GCGGGCGCGGTGGATGGAGCAGGAGGGGCC  
>H2-K\_HsgRNA24  
CGGCGCTGATCACCAAACACAAGTGGGAGC  
>H2-K\_HsgRNA25  
TCTGGCTGTGAAGTGGGGTCCGACGGGCGA  
>H2-K\_HsgRNA26  
CCCTGGCTCCGACTCAGACCCGCGGGGTG  
>H2-K\_HsgRNA27  
CGCGGGTCTGAGTCGGAGCCAGGGCGGCCG  
>H2-K\_HsgRNA28  
CCCCGTACATGGAAGTCGGCTACGTGGACG  
>H2-K\_HsgRNA29  
CCACGTAGCCGACTTCCATGTACCGGGGCT  
>H2-K\_HsgRNA30  
CGGGTACCAGCAGTACGCCTACGACGGCTG

>H2-K\_HsgRNA31  
CACGTAGCCGACTTCCATGTACCGGGGCTC  
>H2-K\_HsgRNA32  
CAGGTCTGCTGTGATGGGTCACATGGGCCT  
>H2-K\_HsgRNA33  
AGGCTGGTGAAGCAGAGAGACTCAGGGCCT  
>H2-K\_HsgRNA34  
TCTGTGTCTCCCGCTCCCAATACTCGGGCC

(15)  $S_{15}^+$ : 56 high on-target activity sgRNAs targeting CD45

>CD45\_HsgRNA1  
TGACAAAGACTTCTGTGTCCAGAAGGGCAA  
>CD45\_HsgRNA2  
CCAGAAATGATGATTGCTGCTCAGGGGCCA  
>CD45\_HsgRNA3  
CAGAAACGCCTAAGCCTAGTTGTGGGGATC  
>CD45\_HsgRNA4  
AGCTAAGGCGACAGAGGTGTCTGATGGTGC  
>CD45\_HsgRNA5  
CCAGAAGTTTGAGCCACAAACCCATGGTCA  
>CD45\_HsgRNA6  
AGACAATAGTATAAATGTTACATGTGGTCC  
>CD45\_HsgRNA7  
CATTAATGCATCCTTTGTGATGGTAGGTAC  
>CD45\_HsgRNA8  
CATCAATGTAGCTGGCATTATGTAGGTGG  
>CD45\_HsgRNA9  
TTGGAATGTCTCAGCTCAAAAGTTCGGAGA  
>CD45\_HsgRNA10  
ACTTACATAGCTGCACACCACCCAGGCCG  
>CD45\_HsgRNA11  
TGTAACATTTATACTATTGTCTGTCGGCCG  
>CD45\_HsgRNA12  
TCACACGATGTGAAGAAGGAAACAGGGTAA  
>CD45\_HsgRNA13  
CTGCACTTTCCAAGAGATTGAACAAGGCAC  
>CD45\_HsgRNA14  
GCGCAGAATACTGGCCAAGCATGGAGGAAG  
>CD45\_HsgRNA15  
GATGAGACAGTTGATGACTTCTGGAGGATG  
>CD45\_HsgRNA16  
CCTTAGTGCTGGTGTGGGCGTACAGGTAC  
>CD45\_HsgRNA17  
AACTATAGATTTATATGTACCACCAGGTGA

>CD45\_HsgRNA18  
TCTTATAGCATAAAAACATATCCATGGGGTT  
>CD45\_HsgRNA19  
TTTGATAGGTCCGGACAAGGTCAATGGAAT  
>CD45\_HsgRNA20  
TTTAATCAGATGATTATAACCGTGTGGAAC  
>CD45\_HsgRNA21  
TTTGATCAGGGCTTCAAGGAACCCAGGAAA  
>CD45\_HsgRNA22  
CAGGCAGCTCTTCCCCTTTCCATGTGGTAC  
>CD45\_HsgRNA23  
CCAGCATGGCATCAATTCCAATGTAGGTAC  
>CD45\_HsgRNA24  
AATACATTAATGCATCCTTTGTGATGGTAG  
>CD45\_HsgRNA25  
AGTACCAGTGTACCACATGGAAAGGGGAAG  
>CD45\_HsgRNA26  
AAGGCCTGGAAGCAGAGGGCAAAGTGGATG  
>CD45\_HsgRNA27  
GCTACCTGGTATTTCAGCCTCCAGAGGGGAG  
>CD45\_HsgRNA28  
CTCTCTGAAATAAATGGAGATGCAGGGTCC  
>CD45\_HsgRNA29  
GACAGAGATGGATCCCAGCAGACAGGGTTG  
>CD45\_HsgRNA30  
AGGTGAGGGTCTTCAGGAACCCCATGGTCT  
>CD45\_HsgRNA31  
GACAGAGGTGTCTGATGGTGCAAGTGGAGG  
>CD45\_HsgRNA32  
ACCTGAGTCTGCATCTAAACCCCATGGATA  
>CD45\_HsgRNA33  
TCTTGCAGCTGGATCCCCACAACCTAGGCTT  
>CD45\_HsgRNA34  
CCCAGCATCGTACCTGGCTCACAGTGGAGT  
>CD45\_HsgRNA35  
GATGGGAAACTTGCTGAATACCCGTGGAAT  
>CD45\_HsgRNA36  
AGCTGGATCCCCACAACCTAGGCTTAGGCGT  
>CD45\_HsgRNA37  
TCAGGGGCCACTAAAAGAAACGATCGGTGA  
>CD45\_HsgRNA38  
TTTAGGGCCATTAGTTTCATAAGGAGGACC  
>CD45\_HsgRNA39  
ACTTGTACTTAACTCCTAGGGCCCCGGGAT

>CD45\_HsgRNA40  
 ATGTGTAGCAGAAATCTTATATCGCGGTGT  
 >CD45\_HsgRNA41  
 ATTTGTATCTTTCAGAGCATTCCACGGGTA  
 >CD45\_HsgRNA42  
 AGAGGTGTCTGATGGTGCAAGTGGAGGTAC  
 >CD45\_HsgRNA43  
 GTTATAAATGTGCAGACAGATTTGGGGAGT  
 >CD45\_HsgRNA44  
 TTCCTAACCTGCAGTGGACGAGGATGGATG  
 >CD45\_HsgRNA45  
 CTTGTACTTAACTCCTAGGGCCCCGGGATG  
 >CD45\_HsgRNA46  
 CTTATAGCATAAAAACATATCCATGGGGTTT  
 >CD45\_HsgRNA47  
 TTCTTATAGCATAAAAACATATCCATGGGGT  
 >CD45\_HsgRNA48  
 TTTGTATCTTTCAGAGCATTCCACGGGTAT  
 >CD45\_HsgRNA49  
 GAAGTCATCAACTGTCTCATCCCGGGGCC  
 >CD45\_HsgRNA50  
 CCTTTCCATGTGGTACACTGGTACTGGTAC  
 >CD45\_HsgRNA51  
 GCTTTGCGTAGAGACTTTACCACTTGAAAA  
 >CD45\_HsgRNA52  
 ATCGTGTGACCATGACAATAACTGTGGCCT  
 >CD45\_HsgRNA53  
 GTCTTTACCTGCAGTGCACCACAATGGGAC  
 >CD45\_HsgRNA54  
 CCATTTATTTTCAGAGAGTTCCACACGGTTA  
 >CD45\_HsgRNA55  
 CCAATTCACCAGCTGGCCAGACCATGGGGT  
 >CD45\_HsgRNA56  
 TATGTTGTCAAGCTAAGGCGACAGAGGTGT

(16)  $S_{16}^+$ : 13 high on-target activity sgRNAs targeting THY1

>THY1\_HsgRNA1  
 AGCCAACCTCACCACCAAGGATGAGGGCGA  
 >THY1\_HsgRNA2  
 GTGCCAGTCTTGCAGGTGTCCCGAGGGCAG  
 >THY1\_HsgRNA3  
 TTCTCATGGCGGCAGTCCAGGCGAAGGTTT  
 >THY1\_HsgRNA4  
 TGTGCCAGTCTTGCAGGTGTCCCGAGGGCA



>THY1\_HsgRNA5  
 TTACCCTAGCCAACTTCACCACCAAGGATG  
 >THY1\_HsgRNA6  
 TTATCCTTGGTGTATTCTCATGGCGGCAG  
 >THY1\_HsgRNA7  
 GGTACGTGTGCTCGGGTATCCCAAGGGTGC  
 >THY1\_HsgRNA8  
 AGGGCTGGTTGGAGAGGGTGACGCGGGAGC  
 >THY1\_HsgRNA9  
 CATCCTTGGTGGTGAAGTTGGCTAGGGTAA  
 >THY1\_HsgRNA10  
 CACAGACAAGCTGGTCAAGTGTGGCGGCAT  
 >THY1\_HsgRNA11  
 CCTTGATATAGGGCTGGTTGGAGAGGGTGA  
 >THY1\_HsgRNA12  
 TCTCGGGTCAGGCTGAACTCATGCTGGATG  
 >THY1\_HsgRNA13  
 TTGGTGGTGAAGTTGGCTAGGGTAAGGACC

(17)  $S_{17}^+$ : 35 high on-target activity sgRNAs targeting CD43

>CD43\_HsgRNA1  
 ACAGAACTGGTTGCTGTGGTAGCAGGGAGT  
 >CD43\_HsgRNA2  
 CGCCACAACAGCAGTAGCGCCACGAGGGCC  
 >CD43\_HsgRNA3  
 GAAGACAATTCAGTAGTTTCCAAGGGGGTTC  
 >CD43\_HsgRNA4  
 AAGAAGACAATTCAGTAGTTTCCAAGGGGG  
 >CD43\_HsgRNA5  
 CTGCAGTTCCGTCTGTCCACAGGATTGGCTG  
 >CD43\_HsgRNA6  
 AAGACAATTCAGTAGTTTCCAAGGGGGTCA  
 >CD43\_HsgRNA7  
 GTCACCACAGCTACTGGGTCTCTGGGGCCC  
 >CD43\_HsgRNA8  
 AATGCCAGCCCATCAGTTTCTGTGGGGTCA  
 >CD43\_HsgRNA9  
 TCTACCCAAGATCCCATAACCACCAGGTCA  
 >CD43\_HsgRNA10  
 TGGACCCAGCATGCCCAAAGAGGAGGAGA  
 >CD43\_HsgRNA11  
 GTCCCTGACCCACAGAACTGATGGGCTG  
 >CD43\_HsgRNA12  
 GGAGCTTACTGTTGTAGCCACAGAGGGTCC

>CD43\_HsgRNA13  
ATGTCTTGCTGGAAACTTCCTGAGAGGCAG  
>CD43\_HsgRNA14  
GCTGGAAACTTCCTGAGAGGCAGTAGGCTC  
>CD43\_HsgRNA15  
AGAAGACAATTCAGTAGTTTCCAAGGGGGT  
>CD43\_HsgRNA16  
ACAGGATTGGCTGCAGTGACAGGAGGGTCA  
>CD43\_HsgRNA17  
CCTTGCACCTTCTCCTCCTCTTTGGGGCAT  
>CD43\_HsgRNA18  
CACTGCAGCCAATCCTGTGACAGACGGACC  
>CD43\_HsgRNA19  
CACTGCAGCCAATCCTGTGACAGACGGACC  
>CD43\_HsgRNA20  
CACTGCAGCCAATCCTGTGACAGACGGACC  
>CD43\_HsgRNA21  
CACTGCAGCCAATCCTGTGACAGACGGACC  
>CD43\_HsgRNA22  
CACTGCAGCCAATCCTGTGACAGACGGACC  
>CD43\_HsgRNA23  
CACTGCAGCCAATCCTGTGACAGACGGACC  
>CD43\_HsgRNA24  
CACTGCAGCCAATCCTGTGACAGACGGACC  
>CD43\_HsgRNA25  
CACTGCAGCCAATCCTGTGACAGACGGACC  
>CD43\_HsgRNA26  
ATTGGCTGCAGGTCCGTCTGTCACAGGATT  
>CD43\_HsgRNA27  
AGATGCTGCAGTTCCGTCTGTCACAGGATT  
>CD43\_HsgRNA28  
ATGGGCTGGCATTCTGGGCTTCAGAGGTAC  
>CD43\_HsgRNA29  
TGGAGCTGTGATATGTGGGGTAGATGGTAG  
>CD43\_HsgRNA30  
ACCTGGACCCAGCATGCCCCAAAGAGGAGG  
>CD43\_HsgRNA31  
TCTGGGGCCCTCGAGTGAGATGCATGGACT  
>CD43\_HsgRNA32  
TTGTGGTCTGCCCCAGGGGCTGATGGTCT  
>CD43\_HsgRNA33  
AGAGGTACTTGGAGCTGTGATATGTGGGGT  
>CD43\_HsgRNA34  
TCTTTGGGGCATGCTGGGTCCAGGTGGCGA

>CD43\_HsgRNA35  
TTGATTCTTGGCTTGGTGACCTGGTGGTTA

(18)  $S_1$ : 377 low on-target activity sgRNAs targeting CD13

>CD13\_LsgRNA1  
TCAGAAATAATACCAACAACCTGGAGGGAGA

>CD13\_LsgRNA2  
GTCAAACAGCTCACTGATCTGGGCCGGCGT

>CD13\_LsgRNA3  
CATGAACCGCTGGACCCTGCAGATGGGCTT

>CD13\_LsgRNA4  
CCAGAACGATCTCTTCAGCACATCAGGCAA

>CD13\_LsgRNA5  
CGGTAACGATTCCACGCTTTACTTTGGTCC

>CD13\_LsgRNA6  
TAAAAACGTACAGGCCCTGTCATTGGGGG

>CD13\_LsgRNA7  
GTGGAACCTCAGTGACATTCCAGTTGGGGTC

>CD13\_LsgRNA8  
TGGAAATATAGAAGCCCTTGGCCATGGTGA

>CD13\_LsgRNA9  
TAGGAATCGGGTTTCAGCGTGTGGGGAGG

>CD13\_LsgRNA10  
TCATAATGACCAGCAAAGAAGTTAAGGATG

>CD13\_LsgRNA11  
CGGTACACATCATTTCAGCACCATGAGGTCT

>CD13\_LsgRNA12  
CAGAACACCATCTACCTGAACCTGTGGGAC

>CD13\_LsgRNA13  
AACTACACCCTCAGCCAGGGGCACAGGGTG

>CD13\_LsgRNA14  
CCTCACACCTTGCAGATCCGGATCTGGGCC

>CD13\_LsgRNA15  
GTGCACACGGCTGCCACGCCAGGAGGATC

>CD13\_LsgRNA16  
GGAGACACTCACGGTTATTATTGGGGTTC

>CD13\_LsgRNA17  
AGTGACAGGGACCTTATGGGCACTGGGAAT

>CD13\_LsgRNA18  
TTGGACAGGGCTGTCAGGTCCTTGGGGTGG

>CD13\_LsgRNA19  
AGTGACATTCCAGTTGGGGTCTTCTGGAAG

>CD13\_LsgRNA20  
AATGACCAGCAAAGAAGTTAAGGATGGGGC

>CD13\_LsgRNA21  
CTCCACCCACAGGCTGTGAACAACCGGTCC  
>CD13\_LsgRNA22  
TTCAACGCCGGCGCCATGGAGAACTGGGGA  
>CD13\_LsgRNA23  
GCGGACGGGGTGGTGGAGGCCACGGGGGAG  
>CD13\_LsgRNA24  
AAAAACGTACAGGCCCTGTCATTGGGGGT  
>CD13\_LsgRNA25  
TCGAACTCGCTGTCCATCTCATACTGGCTG  
>CD13\_LsgRNA26  
GAGAACTGGGGACTGGTGACCTACCGGGAG  
>CD13\_LsgRNA27  
GGGAGACACTCACGGTTATTATTGGGGT  
>CD13\_LsgRNA28  
CAGTAGACGGTGGACCGCAGGTTGGGGTGG  
>CD13\_LsgRNA29  
TGCCAGACTTCAACGCCGGCGCCATGGAGA  
>CD13\_LsgRNA30  
ACACAGATGCAGGCTGCAGATGCCCGGAAG  
>CD13\_LsgRNA31  
TATGAGATGGACAGCGAGTTCGAGGGGGAG  
>CD13\_LsgRNA32  
GGCCAGCAAGTACGTGGACATCTTGGGCGT  
>CD13\_LsgRNA33  
CCTCAGCCACCACCAACCCCGCCTCGGCCA  
>CD13\_LsgRNA34  
AGGGAGCCCTTGAGGTGCACCACCAGGTAC  
>CD13\_LsgRNA35  
AGGCAGCGGAGCACTCACCTGGCCAGGTTG  
>CD13\_LsgRNA36  
GAGGAGCGGGCTGCACCTTGCTGTAGGAGA  
>CD13\_LsgRNA37  
TCTCAGCGTCACCCGGTAGGAATCGGGTTT  
>CD13\_LsgRNA38  
CACCAGCTCAGTCTTGTCAATGTCGGGGGG  
>CD13\_LsgRNA39  
GAGGAGGACAGGGGGTCGAACAGCAGGGAG  
>CD13\_LsgRNA40  
TTCTAGGCCATCCCTGTCATCAATCGGGCA  
>CD13\_LsgRNA41  
TCCGAGGCGGGTGTGGACAGCGGGTGGGAG  
>CD13\_LsgRNA42  
GCCCAGGGTGCAGTACTCACCGCCAGGCC

>CD13\_LsgRNA43  
GCACAGGGTGGTCCTGCGTGGTGTGGGAGG  
>CD13\_LsgRNA44  
GCCCAGTGCCATTGCGGCGGGCCACGGCGA  
>CD13\_LsgRNA45  
ACGGAGTTCCAGAGTGTGAGGAGATGGTCT  
>CD13\_LsgRNA46  
TTCCAGTTGGGGTCTTCTGGAAGTGGGGTG  
>CD13\_LsgRNA47  
TGCCATCAGCACCGCCTGCTCCAACGGAGT  
>CD13\_LsgRNA48  
CATAATCGCCGTGGCCCGCCCAATGGCAC  
>CD13\_LsgRNA49  
TGGCATCGCCTCCCCAGACCAGATTGGCCT  
>CD13\_LsgRNA50  
CCCCATCTGCTCACTTGAATTCTGAGGGGC  
>CD13\_LsgRNA51  
AATGATCTGTGCCCGATTGATGACAGGGAT  
>CD13\_LsgRNA52  
ATTAATGACGCCTTCAACCTGGCCAGGTGA  
>CD13\_LsgRNA53  
GTTTCATGATGTCCCGCACGGTGGTGGGAG  
>CD13\_LsgRNA54  
TACCATGCACCTCCGTACCTTCATGGGGCC  
>CD13\_LsgRNA55  
CTTCATGGCCGGCTCATCGAAGCATGGGAA  
>CD13\_LsgRNA56  
CTCCATGGCGCCGGCGTTGAAGTCTGGCAG  
>CD13\_LsgRNA57  
CCTGATGTGCTGAAGAGATCGTTCTGGGCT  
>CD13\_LsgRNA58  
TATTATTTCTGAAGTGAATGAAGAGGGGTG  
>CD13\_LsgRNA59  
ACTGCAACGCTATCGCCAGGGCGGGGAGG  
>CD13\_LsgRNA60  
GCTCCAACGGAGTTCCAGAGTGTGAGGAGA  
>CD13\_LsgRNA61  
ACCTCAATGTGACGGGCTATTACCGGGTGA  
>CD13\_LsgRNA62  
TGTGCACAATCATCGCACTGTCAGTGGTGT  
>CD13\_LsgRNA63  
AGGTCACCAGTCCCCAGTTCTCCATGGCGC  
>CD13\_LsgRNA64  
AGAACACCATCTACCTGAACCTGTGGGACC

>CD13\_LsgRNA65  
TGACCACCCGCTCCTTGTGCTGCTGGAGG  
>CD13\_LsgRNA66  
ACTACACCCTCAGCCAGGGGCACAGGGTGG  
>CD13\_LsgRNA67  
GGACCACCCTGTGCCCTGGCTGAGGGTGT  
>CD13\_LsgRNA68  
CCAGCACCGTCCGTTTCACCTGCAAGGAGG  
>CD13\_LsgRNA69  
CTCACACCTTGCAGATCCGGATCTGGGCCC  
>CD13\_LsgRNA70  
CCCGCACGGTGGTGGGGAGTTGGATGGACC  
>CD13\_LsgRNA71  
GGAGCACTCACCTGGCCAGGTTGAAGGCGT  
>CD13\_LsgRNA72  
ATGGCACTGGGCCGGGCCAGATCCGGATC  
>CD13\_LsgRNA73  
TGGTCACTGTGATTGCTCATGAGCTGGCCC  
>CD13\_LsgRNA74  
ACCCCACTTCCAGAAGACCCCAACTGGAAT  
>CD13\_LsgRNA75  
CCATCAGAGATGGCAGACAGCAGCAGGACT  
>CD13\_LsgRNA76  
GCGCCAGAGTGACAGGGACCTTATGGGCAC  
>CD13\_LsgRNA77  
TGACCAGCAAAGAAGTTAAGGATGGGGCCC  
>CD13\_LsgRNA78  
AGGCCAGCAAGTACGTGGACATCTTGGGCG  
>CD13\_LsgRNA79  
ATACCAGCACGGGGACCCTTTCCCAGGAGC  
>CD13\_LsgRNA80  
CCTCCAGCAGCAACAAGGAGCGGGTGGTCA  
>CD13\_LsgRNA81  
CGAACAGCAGGGAGTTCTCCCGGTAGGTCA  
>CD13\_LsgRNA82  
TGGACAGCGAGTTCGAGGGGGAGTTGGCAG  
>CD13\_LsgRNA83  
GTCTCAGCGTCACCCGGTAGGAATCGGGTT  
>CD13\_LsgRNA84  
CCACCAGCTCAGTCTTGTCAATGTCGGGGG  
>CD13\_LsgRNA85  
TGGGCAGCTGGCTTACCAAGTTCCAGGTGG  
>CD13\_LsgRNA86  
GGCACAGGGTGGTCCTGCGTGGTGTGGGAG

>CD13\_LsgRNA87  
GGTTCAGGTAGATGGTGTCTGCTAGGCAA  
>CD13\_LsgRNA88  
GCCACAGGTCATTCCACCACTCTATGGTCA  
>CD13\_LsgRNA89  
CTGACAGTGCGATGATTGTGCACACGGCTG  
>CD13\_LsgRNA90  
ATTCCAGTTGGGGTCTTCTGGAAGTGGGGT  
>CD13\_LsgRNA91  
ATCTCATACTGGCTGTCCTTCACCAGGGAG  
>CD13\_LsgRNA92  
GGTTCATGATGTCCCGCACGGTGGTGGGGA  
>CD13\_LsgRNA93  
CTACCATGCACCTCCGTACCTTCATGGGGC  
>CD13\_LsgRNA94  
AGATCATTAATGACGCCTTCAACCTGGCCA  
>CD13\_LsgRNA95  
CCGACATTGACAAGACTGAGCTGGTGGAGC  
>CD13\_LsgRNA96  
GTAACATTGGAATCGGGGTCAAGGAGGAAG  
>CD13\_LsgRNA97  
TGGTCCAAGGTGGTGGCCGAGGCGGGTTG  
>CD13\_LsgRNA98  
ATTTCCAAGTCCCTGGGCATCCTGGGGATC  
>CD13\_LsgRNA99  
AGGACCACCCTGTGCCCCTGGCTGAGGGTG  
>CD13\_LsgRNA100  
GCTGCCACGCCAGGAGGATCCCCAGGATG  
>CD13\_LsgRNA101  
GATTCCACGCTTTACTTTGGTCCAAGGTGG  
>CD13\_LsgRNA102  
TTCCCCAGA ACTACCTGAAGAAGCAGGTCA  
>CD13\_LsgRNA103  
AGCGCCAGAGTGACAGGGACCTTATGGGCA  
>CD13\_LsgRNA104  
ATGACCAGCAAAGAAGTTAAGGATGGGGCC  
>CD13\_LsgRNA105  
GTGCCATAAGGTCCCTGTCACTCTGGCGC  
>CD13\_LsgRNA106  
CCTCCCCACCATCACCATGGCCAAGGGCTT  
>CD13\_LsgRNA107  
CCACCCCAGGGCGCCTCAGTCCTCAGGATG  
>CD13\_LsgRNA108  
GGGCCCCATCCTTAACCTTCTTTGCTGGTCA

>CD13\_LsgRNA109  
GGATCCCAGGATGCCAGGGACTTGAAAA  
>CD13\_LsgRNA110  
CCAACCCCGCCTCGGCCACCACCTTGGACC  
>CD13\_LsgRNA111  
CTGACCCCTCCCCCACAGTGGTTCGGGAA  
>CD13\_LsgRNA112  
GTCACCCCTGGGGCAGGTACAGCGAGGTTA  
>CD13\_LsgRNA113  
ATGTCCCGCACGGTGGTGGGGAGTTGGATG  
>CD13\_LsgRNA114  
CCCACCCGCTGTCCACACCCGCCTCGGAGA  
>CD13\_LsgRNA115  
CACACCCTACCCACTCCAAAAATCAGGTGA  
>CD13\_LsgRNA116  
TGACCCCTCCCCCACAGTGGTTCGGGAAC  
>CD13\_LsgRNA117  
ATCTCCGAGGCGGGTGTGGACAGCGGGTGG  
>CD13\_LsgRNA118  
TGGACCGCAGGTTGGGGTGGATCCTGGTGT  
>CD13\_LsgRNA119  
TGGCCCGCCGCAATGGCACTGGGCCGGGCC  
>CD13\_LsgRNA120  
CCACCCGCTCCTTGTTGCTGCTGGAGGAGG  
>CD13\_LsgRNA121  
GGGCCCAGCCAGTGCCATTGCGGCGGGCC  
>CD13\_LsgRNA122  
TAGCCCGTCACATTGAGGTTTACAGCAGGACC  
>CD13\_LsgRNA123  
ACACCCTCAGCCAGGGGCACAGGGTGGTCC  
>CD13\_LsgRNA124  
TCCTCCTCCAGCAGCAACAAGGAGCGGGTG  
>CD13\_LsgRNA125  
CTGACCTCCTGCAGGTGGTCCCACAGGTTT  
>CD13\_LsgRNA126  
GCATCCTGAGGACTGAGGCGCCCTGGGGTG  
>CD13\_LsgRNA127  
GGGTCTGCTGAACCTCAATGTGACGGGCT  
>CD13\_LsgRNA128  
GTGACCTGCTTCTTCAGGTAGTTCTGGGGA  
>CD13\_LsgRNA129  
GCATCCTGGGGATCCTCCTGGGCGTGGCAG  
>CD13\_LsgRNA130  
TGAACCTGTGGGACCACCTGCAGGAGGTCA



>CD13\_LsgRNA131  
CTGTCCTTCACCAGGGAGCCCTTGAGGTGC  
>CD13\_LsgRNA132  
GGGTGGAACAGCAGGGAGTTCTCCCGGTAG  
>CD13\_LsgRNA133  
TCATCGAAGCATGGGAAGGACTTCCGGGCA  
>CD13\_LsgRNA134  
GAGGCGAAGCCCTCGTTCAGCCACAGGTCA  
>CD13\_LsgRNA135  
CCCCCGACATTGACAAGACTGAGCTGGTGG  
>CD13\_LsgRNA136  
TCCCCGAGATGGGGGTCTACCTGGTGGGCC  
>CD13\_LsgRNA137  
GCTCCGAGGTCTATGGCCCCATGAAGGTAC  
>CD13\_LsgRNA138  
ACGGCGATTATGCCCTGAACGTGACGGGCC  
>CD13\_LsgRNA139  
CCGGCGCCATGGAGAACTGGGGACTGGTGA  
>CD13\_LsgRNA140  
GGCCCCGCCAATGGCACTGGGCCGGGCC  
>CD13\_LsgRNA141  
TCAACGCCGGCGCCATGGAGAACTGGGGAC  
>CD13\_LsgRNA142  
ATGGCGCCGGCGTTGAAGTCTGGCAGGCCA  
>CD13\_LsgRNA143  
GCTTCGCCTCCTACGTGGAGTACCTGGGTG  
>CD13\_LsgRNA144  
CACCCGCCTCGGAGATCAACACGCCGGGCC  
>CD13\_LsgRNA145  
GCAACGCTATCGCCAGGGCGGGGAGGAGG  
>CD13\_LsgRNA146  
AACACGCTGAAACCCGATTCTACCGGGTG  
>CD13\_LsgRNA147  
TACTCGCTGCGGTAGAAGCCCGCCAGGTCA  
>CD13\_LsgRNA148  
TCCACGCTTTACTTTGGTCCAAGGTGGTGG  
>CD13\_LsgRNA149  
GGCCCCGCCAGTGCCATTGCGGCGGGCCA  
>CD13\_LsgRNA150  
CGGACGGGGTGGTGGAGGCCACGGGGGAGC  
>CD13\_LsgRNA151  
GAATCGGGTTTCAGCGTGTGGGGAGGCGG  
>CD13\_LsgRNA152  
GGTACGGTCTCAGCGTCACCCGGTAGGAAT

>CD13\_LsgRNA153  
TAGACGGTGGACCGCAGGTTGGGGTGGATC  
>CD13\_LsgRNA154  
AAAACGTACAGGCCCTGTCATTGGGGGTG  
>CD13\_LsgRNA155  
AGACCGTACCTCACCCCAATGACAGGGGC  
>CD13\_LsgRNA156  
ATGGCGTCAAACAGCTCACTGATCTGGGCC  
>CD13\_LsgRNA157  
GTCACGTTTCAGGGCATAATCGCCGTGGCCC  
>CD13\_LsgRNA158  
GCTTCTACCGCAGCGAGTACATGGAGGGCA  
>CD13\_LsgRNA159  
GAAGCTCAACTACACCCTCAGCCAGGGGCA  
>CD13\_LsgRNA160  
CCCCTCACCTTTGGGAAGCATGTTGGACA  
>CD13\_LsgRNA161  
TCTGCTCACTTGAATTCTGAGGGGCGGGTA  
>CD13\_LsgRNA162  
CCAGCTCAGTCTTGTCAATGTCGGGGGGCT  
>CD13\_LsgRNA163  
CCTCCTCCAGCAGCAACAAGGAGCGGGTGG  
>CD13\_LsgRNA164  
AGAGCTCCCACTCACTGGTCCATCAGGTTT  
>CD13\_LsgRNA165  
TGGCCTCCTTGCAGGTGAAACGGACGGTGC  
>CD13\_LsgRNA166  
CCCCTCCTTGTGCTGCTGGAGGAGGACA  
>CD13\_LsgRNA167  
CACACTCTGGAACCTCCGTTGGAGCAGGCGG  
>CD13\_LsgRNA168  
GGTCTGACTATGCGGAGCCCACCTGGAAC  
>CD13\_LsgRNA169  
CGGGCTGCACCTTGCTGTAGGAGATGGCGT  
>CD13\_LsgRNA170  
CCATCTGCTCACTTGAATTCTGAGGGGCGG  
>CD13\_LsgRNA171  
CAGGCTGCTCAGGGCGGCCTCCCAGGGCAT  
>CD13\_LsgRNA172  
GGTCTGCTGAACCTCAATGTGACGGGCTA  
>CD13\_LsgRNA173  
CCTGCTGCTGTCTGCCATCTCTGATGGATG  
>CD13\_LsgRNA174  
TGACCTGCTTCTTCAGGTAGTTCTGGGGAA

>CD13\_LsgRNA175  
AAGTCTGGCAGGCCAATCTGGTCTGGGGAG  
>CD13\_LsgRNA176  
GCAGCTGGCTTACCAAGTTCCAGGTGGGCT  
>CD13\_LsgRNA177  
GCTCCTGGGAAAGGGTCCCCGTGCTGGTAT  
>CD13\_LsgRNA178  
AGAACTGGGGACTGGTGACCTACCGGGAGA  
>CD13\_LsgRNA179  
CGTGCTGGTATCCACCGTGATGACCGGGAA  
>CD13\_LsgRNA180  
GCCCCGTGCATTGGGGGTGAGGTACGGTCT  
>CD13\_LsgRNA181  
AGCCCTGTCCAACATGCTTCCCAAAGGTGA  
>CD13\_LsgRNA182  
GTACCTTCATGGGGCCATAGACCTCGGAGC  
>CD13\_LsgRNA183  
AGTCCCTCCCATGCTTCGATGAGCCGGCCA  
>CD13\_LsgRNA184  
CATGCTTCGATGAGCCGGCCATGAAGGCCG  
>CD13\_LsgRNA185  
CGGGCTTCTACCGCAGCGAGTACATGGAGG  
>CD13\_LsgRNA186  
AGGGCTTCTATATTTCCAAGTCCCTGGGCA  
>CD13\_LsgRNA187  
GGGACTTGAAAATATAGAAGCCCTTGGCCA  
>CD13\_LsgRNA188  
CAGTCTTGTCAATGTGCGGGGGCTGGGAGC  
>CD13\_LsgRNA189  
TCACCTTTGGGAAGCATGTTGGACAGGGCT  
>CD13\_LsgRNA190  
TTCAGAAATAATACCAACAACCTGGAGGGAG  
>CD13\_LsgRNA191  
TCATGAACCGCTGGACCCTGCAGATGGGCT  
>CD13\_LsgRNA192  
ACCTGAACCTGTGGGACCACCTGCAGGAGG  
>CD13\_LsgRNA193  
ACAAGAACGCCAACAGCTCCCCCGTGGCCT  
>CD13\_LsgRNA194  
CATCGAAGCATGGGAAGGACTTCCGGGCAT  
>CD13\_LsgRNA195  
GCTTGAAGTAGCTCAGGCTGCTCAGGGCGG  
>CD13\_LsgRNA196  
TCTGGAAGTGGGGTGTGTTGGACCTGGGCAG

>CD13\_LsgRNA197  
GTAGGAATCGGGTTTCAGCGTGTGGGGAG  
>CD13\_LsgRNA198  
GGTGAATGACCTGTGGCTGAACGAGGGCT  
>CD13\_LsgRNA199  
TGCTGAATGATGTGTACCGCGTGATGGCAG  
>CD13\_LsgRNA200  
TGGGGAATTTGCAGAAAGACCTCATGGTGC  
>CD13\_LsgRNA201  
GGGAGACACTCACGGGTTATTATTGGGGTT  
>CD13\_LsgRNA202  
GAGTGACAGGGACCTTATGGGCACTGGGAA  
>CD13\_LsgRNA203  
GTTGGACAGGGCTGTCAGGTCCCTGGGGTG  
>CD13\_LsgRNA204  
CAAGGACCCCCACTCACCTGATTTTGGGAG  
>CD13\_LsgRNA205  
GCTGGACCCTGCAGATGGGCTTCCCCGGTCA  
>CD13\_LsgRNA206  
GGCGGACGGGGTGGTGGAGGCCACGGGGGA  
>CD13\_LsgRNA207  
TGATGACGTCAGTGGCCTCCTTGCAGGTGA  
>CD13\_LsgRNA208  
GCCAGAGACCATCTCCTCACACTCTGGAAC  
>CD13\_LsgRNA209  
GTATGAGATGGACAGCGAGTTCGAGGGGGA  
>CD13\_LsgRNA210  
CCCCGAGATGGGGGTCTACCTGGTGGGCCA  
>CD13\_LsgRNA211  
CAAGGAGGAAGTGCTCCTGGGAAAGGTCC  
>CD13\_LsgRNA212  
CCAGGAGGATCCCCAGGATGCCAGGGACT  
>CD13\_LsgRNA213  
CCTTGAGGTGCACCACCAGGTACTCGGTGG  
>CD13\_LsgRNA214  
TCCAGAGTGTGAGGAGATGGTCTCTGGCCT  
>CD13\_LsgRNA215  
GGGGGAGTTGGCAGATGACCTGGCGGGCTT  
>CD13\_LsgRNA216  
GGTGGATAAGCGTGATGTTGAACTCGGCCT  
>CD13\_LsgRNA217  
GGGCGATAGCGTTGCAGTAGACGGTGGACC  
>CD13\_LsgRNA218  
TGCAGATGGGCTTCCCCGTCATCACGGTGG

>CD13\_LsgRNA219  
TAAGGATGGGGCCCGTCACGTTTCAGGGCAT  
>CD13\_LsgRNA220  
GGTAGATGGTGTCTGGTAGGCAAAGGTGT  
>CD13\_LsgRNA221  
GCGTGATGTTGAACTCGGCCTTCATGGCCG  
>CD13\_LsgRNA222  
CGGCGATTATGCCCTGAACGTGACGGGGCCC  
>CD13\_LsgRNA223  
GATGGCAGACAGCAGCAGGACTACTGGCTG  
>CD13\_LsgRNA224  
CCACGCAGGACCACCCTGTGCCCTGGCTG  
>CD13\_LsgRNA225  
AGAAGCAGGCATCCAATGGTGTCTTGGTAT  
>CD13\_LsgRNA226  
CCTTGCAGGTGAAACGGACGGTGCTGGAGC  
>CD13\_LsgRNA227  
TCCTGCAGGTGGTCCCACAGGTTTCAGGTAG  
>CD13\_LsgRNA228  
GGAAGCATGTTGGACAGGGCTGTCAGGTCC  
>CD13\_LsgRNA229  
GTCTGCCATCTCTGATGGATGTGATGGGCA  
>CD13\_LsgRNA230  
CCAGGCCCTGCTTGAATACGTCCTCGGACA  
>CD13\_LsgRNA231  
CCCAGCCTCATACCAAGACACCATTGGATG  
>CD13\_LsgRNA232  
CTTCGCCCTCTACGTGGAGTACCTGGGTGC  
>CD13\_LsgRNA233  
AGAAGCTCAACTACACCCTCAGCCAGGGGC  
>CD13\_LsgRNA234  
ACCAGCTCAGTCTTGTCAATGTCGGGGGGC  
>CD13\_LsgRNA235  
ACACGCTGAAACCCGATTCTACCGGGTGA  
>CD13\_LsgRNA236  
TCAGGCTGCTCAGGGCGGCCTCCAGGGCA  
>CD13\_LsgRNA237  
TTCGGGAACCTGGTGACCATAGAGTGGTGG  
>CD13\_LsgRNA238  
GACAGGAAGCTGGAGAGCATCCTGAGGACT  
>CD13\_LsgRNA239  
TTCTGGAAGTGGGGTGCTGGGACCTGGGCA  
>CD13\_LsgRNA240  
GGTAGGAATCGGGTTTCAGCGTGTGGGGA

>CD13\_LsgRNA241  
TGTTGGACAGGGCTGTCAGGTCCTTGGGGT  
>CD13\_LsgRNA242  
AGGAGGACAGGGGTTCGAACAGCAGGGAGT  
>CD13\_LsgRNA243  
AGGCGGACGGGGTGGTGGAGGCCACGGGGG  
>CD13\_LsgRNA244  
CCGAGGACGTATTCAAGCAGGGCCTGGCGG  
>CD13\_LsgRNA245  
AGCTGGAGAGCATCCTGAGGACTGAGGCGC  
>CD13\_LsgRNA246  
GGAGGGAGATCCCAGAAAACCTGATGGACC  
>CD13\_LsgRNA247  
TCAAGGAGGAAGTGCTCCTGGGAAAGGGTC  
>CD13\_LsgRNA248  
CCCAGGAGGATCCCCAGGATGCCAGGGAC  
>CD13\_LsgRNA249  
TGGTGGAGGCCACGGGGGAGCTGTTGGCGT  
>CD13\_LsgRNA250  
AGGGGGAGTTGGCAGATGACCTGGCGGGCT  
>CD13\_LsgRNA251  
TTAAGGATGGGGCCCGTCACGTTTCAGGGCA  
>CD13\_LsgRNA252  
CGCAGGCAGGGCCCACTCACCTTTGGGAAG  
>CD13\_LsgRNA253  
CCTGGGCATCCTGGGGATCCTCCTGGGCGT  
>CD13\_LsgRNA254  
TCTAGGCCATCCCTGTCATCAATCGGGCAC  
>CD13\_LsgRNA255  
TACAGGCCCTGTCATTGGGGGTGAGGTAC  
>CD13\_LsgRNA256  
TCTGGGCCCGGCCAGTGCCATTGCGGCGG  
>CD13\_LsgRNA257  
TGGTGGCCGAGGCGGGTTGGTGGTGGCTG  
>CD13\_LsgRNA258  
CCTGGGCGATAGCGTTGCAGTAGACGGTGG  
>CD13\_LsgRNA259  
CCGAGGCGGGTTGGTGGTGGCTGAGGCGG  
>CD13\_LsgRNA260  
GAGGGCGGGTAACATTGGAATCGGGGTCA  
>CD13\_LsgRNA261  
GGCCGGCGTGTTGATCTCCGAGGCGGGTGT  
>CD13\_LsgRNA262  
TGTTGGCGTTCCTTGTTCCTCCTGGGAGT

>CD13\_LsgRNA263  
TGGTGGCTGAGGCGGACGGGGTGGTGGAGG  
>CD13\_LsgRNA264  
GGCTGGCTGCTACTGACCTCCTGCAGGTGG  
>CD13\_LsgRNA265  
GGCTGGGAGCCTCCCACACCACGCAGGACC  
>CD13\_LsgRNA266  
CCAGGGGCACAGGGTGGTCTCGTGGTGT  
>CD13\_LsgRNA267  
CCCTGGGCATCCTGGGGATCCTCCTGGGCG  
>CD13\_LsgRNA268  
TGAGGGGCGGGTAACATTGGAATCGGGGTC  
>CD13\_LsgRNA269  
GACAGGGCTGTCAGGTCCTTGGGGTGGATA  
>CD13\_LsgRNA270  
CTGAGGGGCGGGTAACATTGGAATCGGGGT  
>CD13\_LsgRNA271  
TCGAGGGGGAGTTGGCAGATGACCTGGCGG  
>CD13\_LsgRNA272  
AAGAGGGGTGTGACCTGCTTCTTCAGGTAG  
>CD13\_LsgRNA273  
AGGCGGGGTTGGTGGTGGCTGAGGCGGACG  
>CD13\_LsgRNA274  
AGGCGGTTGTGGACAGCGGGTGGGAGGAGG  
>CD13\_LsgRNA275  
TCGGGGTCAAGGAGGAAGTGCTCCTGGGAA  
>CD13\_LsgRNA276  
TGGTGGTGCACCTCAAGGGCTCCCTGGTGA  
>CD13\_LsgRNA277  
AGCTGGTGGAGCCCACCGAGTACCTGGTGG  
>CD13\_LsgRNA278  
GGGTGGTGGCCACTACACAGATGCAGGCTG  
>CD13\_LsgRNA279  
AGGTGGTGGCCGAGGCGGGGTTGGTGGTGG  
>CD13\_LsgRNA280  
TGGTGGTGGCTGAGGCGGACGGGGTGGTGG  
>CD13\_LsgRNA281  
CCAAGGTGGTGGCCGAGGCGGGGTTGGTGG  
>CD13\_LsgRNA282  
GGTTGGTGGTGGCTGAGGCGGACGGGGTGG  
>CD13\_LsgRNA283  
CACAGGTTGAGGTAGATGGTGTCTGGTGG  
>CD13\_LsgRNA284  
AAACGTACAGGCCCTGTTCATTGGGGTGA

>CD13\_LsgRNA285  
GACCGTACCTCACCCCAATGACAGGGGCC  
>CD13\_LsgRNA286  
TGGAGTACCTGGGTGCTGACTATGCGGAGC  
>CD13\_LsgRNA287  
CCGAGTACCTGGTGGTGCACCTCAAGGGCT  
>CD13\_LsgRNA288  
TCTGGTAGGCAAAGGTGTGGAGGTAGGACT  
>CD13\_LsgRNA289  
TGGCGTCAAACAGCTCACTGATCTGGGCCG  
>CD13\_LsgRNA290  
CGGGGTCAAGGAGGAAGTGCTCCTGGGAAA  
>CD13\_LsgRNA291  
TTTGGTCCAAGGTGGTGGCCGAGGCGGGGT  
>CD13\_LsgRNA292  
GGTGGTCCCACAGGTTTCAGGTAGATGGTGT  
>CD13\_LsgRNA293  
TCCTGTCCGAGGACGTATTCAAGCAGGGCC  
>CD13\_LsgRNA294  
CCCTGTCCTCCTCCAGCAGCAACAAGGAGC  
>CD13\_LsgRNA295  
TACTGTCTCTCTTCAATCAGGAAGAGGGTG  
>CD13\_LsgRNA296  
TGGGGTCTTCTGGAAGTGGGGTGCTGGGAC  
>CD13\_LsgRNA297  
TGAGGTGCACCACCAGGTACTCGGTGGGCT  
>CD13\_LsgRNA298  
TGCTGTGGATGATGATGACGTCAGTGGCCT  
>CD13\_LsgRNA299  
CGCCGTGGCCCGCCGAATGGCACTGGGCC  
>CD13\_LsgRNA300  
CAGGGTGGTCCCTGCGTGGTGTGGGAGGCTC  
>CD13\_LsgRNA301  
GTGAGTTCGACTACGTGGAGAAGCAGGCAT  
>CD13\_LsgRNA302  
GCGTGTGATCTCCGAGGCGGGTGTGGACA  
>CD13\_LsgRNA303  
CCTTGTGCTGCTGGAGGAGGACAGGGGGT  
>CD13\_LsgRNA304  
TCCAGTTGGGGTCTTCTGGAAGTGGGGTGC  
>CD13\_LsgRNA305  
CTCTGTTTATTTCCAGTGCCCATTAAGGTCC  
>CD13\_LsgRNA306  
TCGGGTTTCAGCGTGTGGGGAGGCGGTAA



>CD13\_LsgRNA307  
CGGGTAACATTGGAATCGGGGTCAAGGAGG  
>CD13\_LsgRNA308  
CTTCTACCGCAGCGAGTACATGGAGGGCAA  
>CD13\_LsgRNA309  
ACCGTACCTCACCCCAATGACAGGGGCCT  
>CD13\_LsgRNA310  
CGAGTACCTGGTGGTGCACCTCAAGGGCTC  
>CD13\_LsgRNA311  
TGAATACGTCCTCGGACAGGAAGCTGGAGA  
>CD13\_LsgRNA312  
CGTCTACTGCAACGCTATCGCCCAGGGCGG  
>CD13\_LsgRNA313  
GGACTACTGGCTGATAGATGTAAGAGGTAA  
>CD13\_LsgRNA314  
GCAGTAGACGGTGGACCGCAGGTTGGGGTG  
>CD13\_LsgRNA315  
ACGCTATCGCCCAGGGCGGGGAGGAGGAGT  
>CD13\_LsgRNA316  
GTATTATTTCTGAAGTGAATGAAGAGGGGT  
>CD13\_LsgRNA317  
AACCTCAATGTGACGGGCTATTACCGGGTG  
>CD13\_LsgRNA318  
CTGCTCACTTGAATTCTGAGGGGCGGGTAA  
>CD13\_LsgRNA319  
CACTTCAGAAATAATACCAACAACCTGGAGG  
>CD13\_LsgRNA320  
TTGGTCCAAGGTGGTGGCCGAGGCGGGGTT  
>CD13\_LsgRNA321  
TATTTCCAAGTCCCTGGGCATCCTGGGGAT  
>CD13\_LsgRNA322  
TCATTCCACCACTCTATGGTCACCAGGTTC  
>CD13\_LsgRNA323  
CCAGTCCCAGTTCTCCATGGCGCCGGCGT  
>CD13\_LsgRNA324  
CCTGTCCGAGGACGTATTCAAGCAGGGCCT  
>CD13\_LsgRNA325  
GGGTTCTCCATCCACTGCTTGAAAAGGCCA  
>CD13\_LsgRNA326  
CCCATCTGCTCACTTGAATTCTGAGGGGCG  
>CD13\_LsgRNA327  
GAAGTCTGGCAGGCCAATCTGGTCTGGGGA  
>CD13\_LsgRNA328  
GTGTTCTGGTAGGCAAAGGTGTGGAGGTAG

>CD13\_LsgRNA329  
GGGGTCTTCTGGAAGTGGGGTGCTGGGACC  
>CD13\_LsgRNA330  
TCAGTCTTGTCAATGTCTGGGGGGCTGGGAG  
>CD13\_LsgRNA331  
TGGATCTTTAATTGCAGCTACGTGTGGATT  
>CD13\_LsgRNA332  
CGGGTGAAC TACGACGAAGAGAACTGGAGG  
>CD13\_LsgRNA333  
AGCTTGAAGTAGCTCAGGCTGCTCAGGGCG  
>CD13\_LsgRNA334  
GCGTTGAAGTCTGGCAGGCCAATCTGGTCT  
>CD13\_LsgRNA335  
TGTTTGACGCCATCTCCTACAGCAAGGTGC  
>CD13\_LsgRNA336  
AGTATGAGATGGACAGCGAGTTCGAGGGGG  
>CD13\_LsgRNA337  
TGGCTGAGGCGGACGGGGTGGTGGAGGCCA  
>CD13\_LsgRNA338  
TTCATGATGTCCCGCACGGTGGTGGGGAGT  
>CD13\_LsgRNA339  
CTACTGCAACGCTATCGCCCAGGGCGGGGA  
>CD13\_LsgRNA340  
ATTGTGCACACGGCTGCCACGCCCAGGAGG  
>CD13\_LsgRNA341  
CATCTGCAGCCTGCATCTGTGTAGTGGCCA  
>CD13\_LsgRNA342  
GCGTTGCAGTAGACGGTGGACCGCAGGTTG  
>CD13\_LsgRNA343  
TCTGTGCCCGATTGATGACAGGGATGGCCT  
>CD13\_LsgRNA344  
ACATTGCCCTCCATGTACTCGCTGCGGTAG  
>CD13\_LsgRNA345  
ACTATGCGGAGCCCACCTGGAAC TTGGTAA  
>CD13\_LsgRNA346  
ACCGTGCGGGACATCATGAACCGCTGGACC  
>CD13\_LsgRNA347  
TGGCTGCTACTGACCTCCTGCAGGTGGTCC  
>CD13\_LsgRNA348  
TGATTGCTCATGAGCTGGCCCACCAGGTAG  
>CD13\_LsgRNA349  
TTGTTGCTGCTGGAGGAGGACAGGGGGTCG  
>CD13\_LsgRNA350  
TACGTGGACATCTTGGGCGTGGTGTGGAAC

>CD13\_LsgRNA351  
GTGCTGGAGCCCTTAAAAACGTACAGGCC  
>CD13\_LsgRNA352  
GCCGTGGCCCGCCGCAATGGCACTGGGCCG  
>CD13\_LsgRNA353  
TCAGTGGCCTCCTTGCAGGTGAAACGGACG  
>CD13\_LsgRNA354  
CTGTTGGCGTTCTTGTCTCTCCTGGGAG  
>CD13\_LsgRNA355  
TTTCTGGGATCTCCCTCCAGTTGTTGGTAT  
>CD13\_LsgRNA356  
ACGGTGGTGGGGAGTTGGATGGACCGTTG  
>CD13\_LsgRNA357  
GGGTTGGTGGTGGCTGAGGCGGACGGGGTG  
>CD13\_LsgRNA358  
GGCATGTACTGTCTCTCTTCAATCAGGAAG  
>CD13\_LsgRNA359  
AGGGTGTAGTTGAGCTTCTTGCTGTGGATG  
>CD13\_LsgRNA360  
TCATTGTCAGTGAGTTCGACTACGTGGAGA  
>CD13\_LsgRNA361  
CTGATGTGCTGAAGAGATCGTTCTGGGCTG  
>CD13\_LsgRNA362  
CGGGTGTGGACAGCGGGTGGGAGGAGCCA  
>CD13\_LsgRNA363  
ATGGTGTCTGGTAGGCAAAGGTGTGGAGG  
>CD13\_LsgRNA364  
TCCTTGTGCTGCTGGAGGAGGACAGGGGG  
>CD13\_LsgRNA365  
ATATTTCCAAGTCCCTGGGCATCCTGGGGA  
>CD13\_LsgRNA366  
AACCTTCCTGTTGGGGCAGGGTGGTGGCCA  
>CD13\_LsgRNA367  
GGGCTTCTATATTTCCAAGTCCCTGGGCAT  
>CD13\_LsgRNA368  
TGAATTCTGAGGGGCGGGTAACATTGGAAT  
>CD13\_LsgRNA369  
GATGTTGAACTCGGCCTTCATGGCCGGCTC  
>CD13\_LsgRNA370  
CTTGTGCTGCTGGAGGAGGACAGGGGGTC  
>CD13\_LsgRNA371  
TACTTTGGTCCAAGGTGGTGGCCGAGGCGG  
>CD13\_LsgRNA372  
GGGGTGGTGGTGGCTGAGGCGGACGGGGT

>CD13\_LsgRNA373  
 GGTGTTGTTTCAGCGCCAGAGTGACAGGGAC  
 >CD13\_LsgRNA374  
 ACGCTTTACTTTGGTCCAAGGTGGTGGCCG  
 >CD13\_LsgRNA375  
 ATTATTTCTGAAGTGAATGAAGAGGGGTGT  
 >CD13\_LsgRNA376  
 CATGTTTGACCGCTCCGAGGTCTATGGCCC  
 >CD13\_LsgRNA377  
 CACCTTTGGGAAGCATGTTGGACAGGGCTG

(19)  $S_2^-$ : 218 low on-target activity sgRNAs targeting CD15

>CD15\_LsgRNA1  
 GGAAAAGCAGGTACGAGGCCAGGGAGGAGG  
 >CD15\_LsgRNA2  
 TCGAAAGCCAGGTAGAACTTGTAGCGGGCC  
 >CD15\_LsgRNA3  
 GTTGAAGCGCAGCCGGCAGTCAGGGGGCGG  
 >CD15\_LsgRNA4  
 GTGGAAGTAGCGGCGATAGACCGCGGGGT  
 >CD15\_LsgRNA5  
 CCGAAATTGGGCTCCTGCACACAGTGGCCC  
 >CD15\_LsgRNA6  
 CCGAACACGTCCACGGTCACATGTTGGCTC  
 >CD15\_LsgRNA7  
 GGAAACAGGGGCTGGTGGCATGGGTGGTGA  
 >CD15\_LsgRNA8  
 TTCCACCACCGCGACCTCGTGAAGGGGCC  
 >CD15\_LsgRNA9  
 GGGCACCGTGGGGCTCGCCGACGGCGGGCGG  
 >CD15\_LsgRNA10  
 GGCGACCTCCAGCCCCAGGCCCCCGGGCCA  
 >CD15\_LsgRNA11  
 AGCCACTGGGACGAGCGCCAGGCCCCGGGTC  
 >CD15\_LsgRNA12  
 CGATAGACCGCGGGGTTGCGGTCGAGGAAA  
 >CD15\_LsgRNA13  
 ACACAGACGGTCCATGGCAGCCCCCGGCCT  
 >CD15\_LsgRNA14  
 CAGCAGCACGCCCACCGGTGCGGACGGGGT  
 >CD15\_LsgRNA15  
 CGAAAGCCAGGTAGAACTTGTAGCGGGCCA  
 >CD15\_LsgRNA16  
 ACCCAGCGCTGGCCCCGGGGCCTGGGGCTG

>CD15\_LsgRNA17  
AGGCAGCGGCGGCGGCAGAAAGCCCTGGCGA  
>CD15\_LsgRNA18  
CCGTAGGACGCGCGGTTCGGTGAGCAGGCGG  
>CD15\_LsgRNA19  
GTGCAGGAGCCCAATTTTCGGGCACCGGCTG  
>CD15\_LsgRNA20  
TACGAGGCCAGGGAGGAGGCACTTGGGAAG  
>CD15\_LsgRNA21  
GGCCAGGCCTGAGGGCGGGTCGCCGGGGTG  
>CD15\_LsgRNA22  
TGGAAGTAGCGGCGATAGACCGCGGGTTG  
>CD15\_LsgRNA23  
GGCCAGTCGGGGGGCCCTTCACGAGGTCG  
>CD15\_LsgRNA24  
GGACAGTGGCGGGGCCAGGCCTGAGGGCGG  
>CD15\_LsgRNA25  
CGGCAGTGTGCGCCTGGATGCCCCAGGGCG  
>CD15\_LsgRNA26  
TCGAAGTTCATCCAAACCCAGCGCTGGCCC  
>CD15\_LsgRNA27  
GTCCAGTTGAAGAGGTTACTTGCCAGGCTT  
>CD15\_LsgRNA28  
GTTTCATCCAAACCCAGCGCTGGCCCGGGG  
>CD15\_LsgRNA29  
TGCCATGGACCGTCTGTGTGCTGGCGGCCG  
>CD15\_LsgRNA30  
CCCAATTTTCGGGCACCGGCTGCCCCGGCCC  
>CD15\_LsgRNA31  
GGCACAAAGCGCTCGTAGTTGGCACGGTCT  
>CD15\_LsgRNA32  
GGCGCAACGCGTTGCTCGCTGGGGCGGTGC  
>CD15\_LsgRNA33  
TTTCCACCACCGCGACCTCGTGAAGGGGCC  
>CD15\_LsgRNA34  
AAGCCACCCCGGCGACCCGCCCTCAGGCCT  
>CD15\_LsgRNA35  
GCAGCACGCCACCGGTTCGCGACGGGGTTG  
>CD15\_LsgRNA36  
CCAACACGCGCAGATCCACCTCCTCGGCAG  
>CD15\_LsgRNA37  
CGTCCACGTGGATGAAGGCGCCGCGGGGCA  
>CD15\_LsgRNA38  
TGATCAGCGCCGTACACGTCAAGCCGGCGG

>CD15\_LsgRNA39  
AACCCAGCGCTGGCCCGGGGGCCTGGGGCT  
>CD15\_LsgRNA40  
TGGACAGCGTAGCTCCGGCGCCAGTGGAAG  
>CD15\_LsgRNA41  
GCGGCAGCTGCCCCAGCAAGCGTAGGTGA  
>CD15\_LsgRNA42  
GCCCCAGGCCCCCGGGCCAGCGCTGGGTTT  
>CD15\_LsgRNA43  
GGGCCAGGCCTGAGGGCGGGTCGCCGGGGT  
>CD15\_LsgRNA44  
GCCCCAGGCGGGGGCCAGTCGGGGGGCCC  
>CD15\_LsgRNA45  
AAAGCAGGTACGAGGCCAGGGAGGAGGCAC  
>CD15\_LsgRNA46  
TGGACAGTGGCGGGGCCAGGCCTGAGGGCG  
>CD15\_LsgRNA47  
GGGGCATCCAGGCGCACACTGCCGAGGAGG  
>CD15\_LsgRNA48  
CCAACATGTGACCGTGGACGTGTTCGGCCG  
>CD15\_LsgRNA49  
TCATCAAACCCAGCGCTGGCCCGGGGGCC  
>CD15\_LsgRNA50  
AAACCAGCGCTGGCCCGGGGGCCTGGGGC  
>CD15\_LsgRNA51  
AGCCCCAGGCCCCCGGGCCAGCGCTGGGTT  
>CD15\_LsgRNA52  
GCATCCAGGCGCACACTGCCGAGGAGGTGG  
>CD15\_LsgRNA53  
TGCCCCAGGCGGGGGCCAGTCGGGGGGCC  
>CD15\_LsgRNA54  
CACGCCACCGGTCGCGACGGGGTTGGCGA  
>CD15\_LsgRNA55  
ATGCCCCAGGCGGGGGCCAGTCGGGGGGC  
>CD15\_LsgRNA56  
GATGCCCCAGGCGGGGGCCAGTCGGGGGG  
>CD15\_LsgRNA57  
GGGCCCCCGACTGGCCCCCGCCCTGGGGC  
>CD15\_LsgRNA58  
GGCCCCCGACTGGCCCCCGCCCTGGGGCA  
>CD15\_LsgRNA59  
GCCCCCGACTGGCCCCCGCCCTGGGGCAT  
>CD15\_LsgRNA60  
TGGCCCCGCCACTGTCCAGGAAACAGGGGC

>CD15\_LsgRNA61  
GAAGCCCTGGCGACCTCCAGCCCCAGGCC  
>CD15\_LsgRNA62  
TGCCCCGCGGCGCCTTCATCCACGTGGACG  
>CD15\_LsgRNA63  
GGCACCGGCTGCCCCGGCCCCGGCCG  
>CD15\_LsgRNA64  
TCGGCCGGGGCGGGCCGGGGCAGCCGGTGC  
>CD15\_LsgRNA65  
TCCACCTCCTCGGCAGTGTGCGCCTGGATG  
>CD15\_LsgRNA66  
ATCACCTCCTTCTGGGACGAGCCTTGGTGC  
>CD15\_LsgRNA67  
AGCCCCTGTTTCCTGGACAGTGGCGGGGCC  
>CD15\_LsgRNA68  
GGCCCCCTCACGAGGTCGCGGTGGTGAAA  
>CD15\_LsgRNA69  
TCGCCGACGGCGGCGGGCGGGCGGCGC  
>CD15\_LsgRNA70  
GTCCGACGGGGTTGGCGACCCCAGGGCA  
>CD15\_LsgRNA71  
TCGGCGAGCCCCACGGTGCCCCCATGGCGC  
>CD15\_LsgRNA72  
ACTTCGAGTCGCCCTCGCACTCCCCGGGGC  
>CD15\_LsgRNA73  
GAAGCGCAGCCGGCAGTCAGGGGGCGGCCT  
>CD15\_LsgRNA74  
GCGCCGCCCGCCCGCCGCGCCGTCGGCGA  
>CD15\_LsgRNA75  
GGCTCGCCGACGGCGGCGGGCGGGCGG  
>CD15\_LsgRNA76  
TCAGCGCCGTACACGTCAAGCCGGCGGCCG  
>CD15\_LsgRNA77  
TGTGCGCCTGGATGCCCCAGGGCGGGGGCC  
>CD15\_LsgRNA78  
TGTTTCGCGCCATGGGGGCACCGTGGGGCTC  
>CD15\_LsgRNA79  
GCGGCGGGGTGGCGCCGAGCCGGGGGCT  
>CD15\_LsgRNA80  
GCAACGCGTTGCGCCAGAGCTTCTCGGTGA  
>CD15\_LsgRNA81  
AAAGCGCTCGTAGTTGGCACGGTCTGGGCC  
>CD15\_LsgRNA82  
ACGGCGCTGATCACCTACGCTTGCTGGGGG

>CD15\_LsgRNA83  
CAGCCGCTGATGTTGAAGCGCAGCCGGCAG  
>CD15\_LsgRNA84  
CAGCCGGCAGTCAGGGGGCGGCCTCGGGGC  
>CD15\_LsgRNA85  
ACCCCGGCGACCCGCCCTCAGGCCTGGCCC  
>CD15\_LsgRNA86  
ACGGCGGCGGGCGGGCGGGCGGGCGGGTGG  
>CD15\_LsgRNA87  
GCGGCGGCGGGCGGGCGGGCGGGTGGCGC  
>CD15\_LsgRNA88  
CTGCCGGCTGCGCTTCAACATCAGCGGCTG  
>CD15\_LsgRNA89  
TCGCCGGGGTGGCTTCTGGGGTAGAGGTAG  
>CD15\_LsgRNA90  
AGGGCGGGTCGCCGGGGTGGCTTCTGGGGT  
>CD15\_LsgRNA91  
TCCACGGTCACATGTTGGCTCAGTTGGTGG  
>CD15\_LsgRNA92  
GGCACGGTCTGGGCCAGCACCACCGGCAC  
>CD15\_LsgRNA93  
CGACCGGTGGGCGTGCTGCTGTGGTGGGAG  
>CD15\_LsgRNA94  
GGCTCGTCCCAGAAGGAGGTGATGTGGACA  
>CD15\_LsgRNA95  
TGGACGTGTTTCGGCCGGGGCGGGCCGGGGC  
>CD15\_LsgRNA96  
TGGACTACGAGGAGGCAGCGGCGGGCAG  
>CD15\_LsgRNA97  
CCTGCTCACCGACCGCGCTCCTACGGAGA  
>CD15\_LsgRNA98  
CGCACTCCCCGGGGCTGCGAAGCCTGGCAA  
>CD15\_LsgRNA99  
CTACCTTACCCAGAAGCCACCCGGCGA  
>CD15\_LsgRNA100  
AGGCCTGAGGGCGGGTCGCCGGGGTGGCTT  
>CD15\_LsgRNA101  
GGCGCTGATCACCTACGCTTGCTGGGGGCA  
>CD15\_LsgRNA102  
CGTGCTGCTGTGGTGGGAGCCCTTCGGGGG  
>CD15\_LsgRNA103  
TCAACTGGACGCTCTCCTACCGGGCGGACT  
>CD15\_LsgRNA104  
AGCGCTGGCCCGGGGCCTGGGGCTGGAGG



>CD15\_LsgRNA105  
GCTTCTGGGGTAGAGGTAGCCATAAGGCAC  
>CD15\_LsgRNA106  
TACGCTGTCCACATCACCTCCTTCTGGGAC  
>CD15\_LsgRNA107  
GCTGCTGTGGTGGGAGCCCTTCGGGGGGCG  
>CD15\_LsgRNA108  
GTTACTTGCCAGGCTTCGAGCCCCGGGGA  
>CD15\_LsgRNA109  
CGAGGAAAAGCAGGTACGAGGCCAGGGAGG  
>CD15\_LsgRNA110  
CCAGGAAACAGGGGCTGGTGGCATGGGTGG  
>CD15\_LsgRNA111  
TGTTGAAGCGCAGCCGGCAGTCAGGGGGCG  
>CD15\_LsgRNA112  
AGTGGAAGTAGCGGCGATAGACCGCGGGGT  
>CD15\_LsgRNA113  
TTGGGAAGTCGTCCACGTGGATGAAGGCGC  
>CD15\_LsgRNA114  
TCGCGACCGGTGGGCGTGCTGCTGTGGTGG  
>CD15\_LsgRNA115  
ATGTGACCGTGGACGTGTTTCGGCCGGGGCG  
>CD15\_LsgRNA116  
TGGCGACCTCCAGCCCCAGGCCCCGGGCC  
>CD15\_LsgRNA117  
TCGCGACGGGGTTGGCGACGCCAGGGCAG  
>CD15\_LsgRNA118  
CAAAGACGTCCGAGTCCGCCCGGTAGGAGA  
>CD15\_LsgRNA119  
TGGTGAGCCACTGGGACGAGCGCCAGGCCC  
>CD15\_LsgRNA120  
GTACGAGGCCAGGGAGGAGGCACTTGGGAA  
>CD15\_LsgRNA121  
CTTCGAGTCGCCCTCGCACTCCCCGGGGCT  
>CD15\_LsgRNA122  
AGCAGCACGCCACCGGTCGCGACGGGGTT  
>CD15\_LsgRNA123  
GGGGGCAGCTGCCGCCGCTGCCCTGGGCGT  
>CD15\_LsgRNA124  
GCCGGCAGTCAGGGGGCGCCCTCGGGGGCGC  
>CD15\_LsgRNA125  
GGCCGCCAGCACACAGACGGTCCATGGCAG  
>CD15\_LsgRNA126  
GGCTGCCATGGACCGTCTGTGTGCTGGCGG

>CD15\_LsgRNA127  
GGATGCCCCAGGGCGGGGGCCAGTCGGGGG  
>CD15\_LsgRNA128  
ACTGGCCCCCGCCCTGGGGCATCCAGGCGC  
>CD15\_LsgRNA129  
GCTGGCCCCGGGGCCTGGGGCTGGAGGTTCG  
>CD15\_LsgRNA130  
TGGCGCCGAGGCCGGGGGCTGCCATGGACC  
>CD15\_LsgRNA131  
CGCCGCCCGCGTCGGCGAGCCCCACGGTGC  
>CD15\_LsgRNA132  
GTGCGCCTGGATGCCCCAGGGCGGGGGCCA  
>CD15\_LsgRNA133  
TCAGGCCTGGCCCCGCCACTGTCCAGGAAA  
>CD15\_LsgRNA134  
GGGGGCCTGGGGCTGGAGGTCCAGGGCT  
>CD15\_LsgRNA135  
TCTGGCGCAACGCGTTGCTCGCTGGGGCGG  
>CD15\_LsgRNA136  
GTGTGCGCCTGGATGCCCCAGGGCGGGGGC  
>CD15\_LsgRNA137  
GGCGGCGCGGGTGGCGCCGAGGCCGGGGGC  
>CD15\_LsgRNA138  
ATCTGCGCGTGTGGACTACGAGGAGGCAG  
>CD15\_LsgRNA139  
CGGGGCGCTATCGCGCCCCCGAAGGGCTC  
>CD15\_LsgRNA140  
GACGGCGGCGGCGGGCGGGCGGCGGGGTG  
>CD15\_LsgRNA141  
CGGCGCGGGTGGCGCCGAGGCCGGGGGCTG  
>CD15\_LsgRNA142  
CGTTGCTCGCTGGGGCGGTGCCGGTGGTGC  
>CD15\_LsgRNA143  
AAGCGCTCGTAGTTGGCACGGTCTGGGCCC  
>CD15\_LsgRNA144  
GGACGCTCTCCTACCGGGCGGACTCGGACG  
>CD15\_LsgRNA145  
CGGCGCTGATCACCTACGCTTGCTGGGGGC  
>CD15\_LsgRNA146  
CAGCGCTGCCTGTTTCGCGCCATGGGGGCAC  
>CD15\_LsgRNA147  
AGGTGCTGCGAGTTCTCGAAAGCCAGGTAG  
>CD15\_LsgRNA148  
CAGAGCTTCTCGGTGATATAATCCAGGTGC

>CD15\_LsgRNA149  
TCGAGGAAAAGCAGGTACGAGGCCAGGGAG  
>CD15\_LsgRNA150  
TCCAGGAAACAGGGGCTGGTGGCATGGGTG  
>CD15\_LsgRNA151  
TGTTGGACTACGAGGAGGCAGCGGCGGCGG  
>CD15\_LsgRNA152  
CCGAGGAGGTGGATCTGCGCGTGTGGACT  
>CD15\_LsgRNA153  
TGGGGGCACCGTGGGGCTCGCCGACGGCGG  
>CD15\_LsgRNA154  
CCGGGGCAGCCGGTGCCCGAAATTGGGCTC  
>CD15\_LsgRNA155  
TGGGGGCAGCTGCCGCGCTGCCCTGGGCG  
>CD15\_LsgRNA156  
AGCCGGCAGTCAGGGGGCGGCTCGGGGCG  
>CD15\_LsgRNA157  
CAGTGGCCCGCTACAAGTTCTACCTGGCTT  
>CD15\_LsgRNA158  
TGGCGGCCGCGGCTTGACGTGTACGGCGC  
>CD15\_LsgRNA159  
GCCAGGCCTGAGGGCGGGTCGCCGGGTGG  
>CD15\_LsgRNA160  
GGTTGGCGACGCCAGGGCAGCGGCGGCAG  
>CD15\_LsgRNA161  
TAGCGGCGATAGACCGGGGTTGCGGTCCG  
>CD15\_LsgRNA162  
CTCTGGCGCAACGCGTTGCTCGCTGGGGCG  
>CD15\_LsgRNA163  
TCCAGGCGCACACTGCCGAGGAGGTGGATC  
>CD15\_LsgRNA164  
GGGCGGCGCGGTGGCGCCGAGCCGGGGG  
>CD15\_LsgRNA165  
TCGGGGCGCTATCGCGCCCCCGAAGGGCT  
>CD15\_LsgRNA166  
AGCCGGCGGCCCGCCAGCACACAGACGGTCC  
>CD15\_LsgRNA167  
CAGTGGCGGGGCCAGGCCTGAGGGCGGGTC  
>CD15\_LsgRNA168  
TGTTGGCTCAGTTGGTGGTAGTAGCGGACC  
>CD15\_LsgRNA169  
GTGGGGCTCGCCGACGGCGGCGGCGGCGG  
>CD15\_LsgRNA170  
CGCGGGGCACAAAGCGCTCGTAGTTGGCAC

>CD15\_LsgRNA171  
GCCGGGGCAGCCGGTGCCCGAAATTGGGCT  
>CD15\_LsgRNA172  
GGGCGGGCGGCGGGGTGGCGCCGAGGCCG  
>CD15\_LsgRNA173  
CGTGGGGCTCGCCGACGGCGGGCGGGCG  
>CD15\_LsgRNA174  
CGCTGGGGCGGTGCCGGTGGTGCTGGGCCC  
>CD15\_LsgRNA175  
TTCGGGGGCGCGATAGCGCCCCGAGGCCG  
>CD15\_LsgRNA176  
GGGCGGGTCGCCGGGTGGCTTCTGGGGTA  
>CD15\_LsgRNA177  
TGGTGGTAGTAGCGGACCCGGGCCTGGCGC  
>CD15\_LsgRNA178  
GGCGGGTCGCCGGGTGGCTTCTGGGGTAG  
>CD15\_LsgRNA179  
CACTGTCCAGGAAACAGGGGCTGGTGGCAT  
>CD15\_LsgRNA180  
GGGCGTCGCAACCCCGTCGCGACCGGTGG  
>CD15\_LsgRNA181  
GACCGTCTGTGTGCTGGCGGCCCGGCTT  
>CD15\_LsgRNA182  
GACCGTGGACGTGTTCCGGCCGGGCGGGCC  
>CD15\_LsgRNA183  
CACCGTGGGGCTCGCCGACGGCGGGCGCG  
>CD15\_LsgRNA184  
CACTGTGTGCAGGAGCCCAATTTTCGGGCAC  
>CD15\_LsgRNA185  
GGACGTGTTTCGGCCGGGGCGGGCCGGGGCA  
>CD15\_LsgRNA186  
ACGCGTTGCTCGCTGGGGCGGTGCCGGTGG  
>CD15\_LsgRNA187  
GCGTGTGGACTACGAGGAGGCAGCGGCGG  
>CD15\_LsgRNA188  
CGGGGTTGGCGACGCCAGGGCAGCGGCGG  
>CD15\_LsgRNA189  
TTCATCCAAACCCAGCGCTGGCCCCGGGGG  
>CD15\_LsgRNA190  
ACGGTCCATGGCAGCCCCCGGCCTCGGCGC  
>CD15\_LsgRNA191  
TGTTTCCTGGACAGTGGCGGGGCCAGGCCT  
>CD15\_LsgRNA192  
GGGCTCGCCGACGGCGGGCGGGCGGGCG

>CD15\_LsgRNA193  
CTGTTTCGCGCCATGGGGGCACCGTGGGGCT  
>CD15\_LsgRNA194  
GGACTCGGACGTCTTTGTGCCTTATGGCTA  
>CD15\_LsgRNA195  
GACCTCGTGAAGGGGCCCGACTGGCCC  
>CD15\_LsgRNA196  
GCGGTCTATCGCCGCTACTTCCACTGGCGC  
>CD15\_LsgRNA197  
TGGATCTGCGCGTGTGGACTACGAGGAGG  
>CD15\_LsgRNA198  
ATGTTGAAGCGCAGCCGGCAGTCAGGGGGC  
>CD15\_LsgRNA199  
CATGTGACCGTGGACGTGTTCCGGCCGGGGC  
>CD15\_LsgRNA200  
GCGCTGATCACCTACGCTTGCTGGGGGCAG  
>CD15\_LsgRNA201  
CCCATGCCACCAGCCCCTGTTTCCTGGACA  
>CD15\_LsgRNA202  
AGTGTGCGCCTGGATGCCCCAGGGCGGGGG  
>CD15\_LsgRNA203  
GTGCTGCTGTGGTGGGAGCCCTTCGGGGGG  
>CD15\_LsgRNA204  
ACCGTGGACGTGTTCCGGCCGGGGCGGGCCG  
>CD15\_LsgRNA205  
AGCCTGGCAAGTAACCTCTTCAACTGGACG  
>CD15\_LsgRNA206  
CTGGTGGCATGGGTGGTGAGCCACTGGGAC  
>CD15\_LsgRNA207  
GCTCTGGCGCAACGCGTTGCTCGCTGGGGC  
>CD15\_LsgRNA208  
TCGCTGGGGCGGTGCCGGTGGTGCTGGGCC  
>CD15\_LsgRNA209  
ACGCTGTCCACATCACCTCCTTCTGGGACG  
>CD15\_LsgRNA210  
CTGCTGTGGTGGGAGCCCTTCGGGGGGCGC  
>CD15\_LsgRNA211  
CCACTGTGTGCAGGAGCCCAATTCGGGGCA  
>CD15\_LsgRNA212  
GACGTGTTCCGGCCGGGGCGGGCCGGGGCAG  
>CD15\_LsgRNA213  
CCTGTTTCGCGCCATGGGGGCACCGTGGGGC  
>CD15\_LsgRNA214  
GATGTTGAAGCGCAGCCGGCAGTCAGGGGG

>CD15\_LsgRNA215  
TTACTTGCCAGGCTTCGCAGCCCCGGGGAG  
>CD15\_LsgRNA216  
TCAGTTGGTGGTAGTAGCGGACCCGGGCCT  
>CD15\_LsgRNA217  
TGCTTTTCCTCGACCGCAACCCCGCGGTCT  
>CD15\_LsgRNA218  
TGGCTTTCGAGAACTCGCAGCACCTGGATT

(20)  $S_3^-$ : 126 low on-target activity sgRNAs targeting CD33

>CD33\_LsgRNA1  
GAGGAAAGCAGCCAGGACAGCAGTGGGCAG  
>CD33\_LsgRNA2  
ATCCAAATTTCTGGCTGCAAGTGCAGGAGT  
>CD33\_LsgRNA3  
CAGGAATGACACCCACCCTACCACAGGGTC  
>CD33\_LsgRNA4  
GGAAACAAGAGACCAGAGCAGGAGTGGTTC  
>CD33\_LsgRNA5  
GCTCACAGGCCCAGGACACAGAGCAGGTCA  
>CD33\_LsgRNA6  
ACTTACAGGTGACGTTGAGCTGGATGGTTC  
>CD33\_LsgRNA7  
AGAGACCAGAGCAGGAGTGGTTCATGGGGC  
>CD33\_LsgRNA8  
AATCACCCACGGCCCCAGGACCACGGCAC  
>CD33\_LsgRNA9  
GAGCACCGAGGAGTGAGTAGTCCTGGGGCC  
>CD33\_LsgRNA10  
AAAAACCTGACCTGCTCTGTGTCTGGGCC  
>CD33\_LsgRNA11  
CCTGACCTGTCAGGTGAAGTTCGCTGGAGC  
>CD33\_LsgRNA12  
AAGAACTCCCCAGTTCATGGTTACTGGTTC  
>CD33\_LsgRNA13  
CAGCACTTACAGGTGACGTTGAGCTGGATG  
>CD33\_LsgRNA14  
AGCCAGAAATTTGGATCCATAGCCAGGGCC  
>CD33\_LsgRNA15  
ATCAAGAAGTACAGGAGGAGACTCAGGGCA  
>CD33\_LsgRNA16  
CCACAGGCCCAAATCCTCATCCCTGGCAC  
>CD33\_LsgRNA17  
GGGGAGGCTGACCCTGTGGTAGGGTGGGTG

>CD33\_LsgRNA18  
GCTCAGGGAGCAGTTGTTCTACTGGGATC  
>CD33\_LsgRNA19  
ACTCAGGGCAGATTCCGCCTCCTTGGGGAT  
>CD33\_LsgRNA20  
CAGCAGGGGCAGCAGTAGCAGCAGCGGCAT  
>CD33\_LsgRNA21  
GGTCAGGTTGGTGCCGTGGTCTTGGGGCCG  
>CD33\_LsgRNA22  
AGTGAGTAGTCCTGGGGCCCAGGGAGGTGG  
>CD33\_LsgRNA23  
GAGTAGTCCTGGGGCCCAGGGAGGTGGGGG  
>CD33\_LsgRNA24  
GAGGAGTGAGTAGTCCTGGGGCCCAGGGAG  
>CD33\_LsgRNA25  
CTAGAGTGCCAGGGATGAGGATTTTGGGCC  
>CD33\_LsgRNA26  
CCCCAGTTCATGGTTACTGGTTCCGGGAAG  
>CD33\_LsgRNA27  
AGGGATAATGGTTCATACTTCTTTCCGGATG  
>CD33\_LsgRNA28  
AGGAATGACACCCACCCTACCACAGGGTCA  
>CD33\_LsgRNA29  
GAAAAATGCTCACATGAAGAAGATGAGGCAG  
>CD33\_LsgRNA30  
TGTCATTCTGCCCCTGCTGTCTGGCTG  
>CD33\_LsgRNA31  
CAAACAAGCTAGATCAAGAAGTACAGGAGG  
>CD33\_LsgRNA32  
TGAGCACCGAGGAGTGAGTAGTCCTGGGGC  
>CD33\_LsgRNA33  
CACTCACCGGGGAGGCTGACCCGTGGGTAG  
>CD33\_LsgRNA34  
CAGCCACTCACCTGCCCACAGCAGGGGCAG  
>CD33\_LsgRNA35  
AGACCAGAGCAGGAGTGGTTCATGGGGCCA  
>CD33\_LsgRNA36  
AAAGCAGCCAGGACAGCAGTGGGCAGGAAT  
>CD33\_LsgRNA37  
TCCCCAGCTCTCTGTGCATGTGACAGGTGA  
>CD33\_LsgRNA38  
TGCTCAGGGAGCAGTTGTTCTACTGGGAT  
>CD33\_LsgRNA39  
GACTCAGGGCAGATTCCGCCTCCTTGGGGA

>CD33\_LsgRNA40  
CTGTCAGGTGAAGTTCGCTGGAGCTGGTGT  
>CD33\_LsgRNA41  
AGGTCAGGTTGGTGCCGTGGTCCTGGGGCC  
>CD33\_LsgRNA42  
TCCCCAGTTCATGGTTACTGGTTCCGGGAA  
>CD33\_LsgRNA43  
TGCTCATAATCACCCACGGCCCCAGGACC  
>CD33\_LsgRNA44  
TGAGCATCGTAGACGCCAGGAGGAGGATA  
>CD33\_LsgRNA45  
GGTTCATGGGGCCATTGGAGGAGCTGGTGT  
>CD33\_LsgRNA46  
AGTTCATGGTTACTGGTTCCGGGAAGGAGC  
>CD33\_LsgRNA47  
GAGACCAGAGCAGGAGTGGTTCATGGGGCC  
>CD33\_LsgRNA48  
TCTCCCATCAGAGTGAAGACCCACAGGAGG  
>CD33\_LsgRNA49  
AAGACCCACAGGAGGAAAGCAGCCAGGACA  
>CD33\_LsgRNA50  
CAGGCCACAGACACAGAGCAGGTCAGGTTT  
>CD33\_LsgRNA51  
GTTTCCCACAGGGGCCCTGGCTATGGATC  
>CD33\_LsgRNA52  
TGGGCCCCAGGACTACTCACTCCTCGGTGC  
>CD33\_LsgRNA53  
GCTGCCCCACCTCCCTGGGCCCCAGGACT  
>CD33\_LsgRNA54  
TGCTCCCTGAGCATCGTAGACGCCAGGAGG  
>CD33\_LsgRNA55  
AGCACCGAGGAGTGAGTAGTCCCTGGGGCCC  
>CD33\_LsgRNA56  
TTCTCCTCACTAGACTTGACCCACAGGCCC  
>CD33\_LsgRNA57  
AAAACCTGACCTGCTCTGTGTCTGGGCCT  
>CD33\_LsgRNA58  
CTGTCTGGCTGCTTTCCTCCTGTGGGTCT  
>CD33\_LsgRNA59  
TAGTCCCTGGGGCCCAGGGAGGTGGGGGCAG  
>CD33\_LsgRNA60  
CCAGCGAACTTCACCTGACAGGTCAGGTTG  
>CD33\_LsgRNA61  
AGTTCGCTGGAGCTGGTGTGACTACGGAGA



>CD33\_LsgRNA62  
TTCCCGGAACCAGTAACCATGAACTGGGGA  
>CD33\_LsgRNA63  
ACCACGGCACCAACCTGACCTGTCAGGTGA  
>CD33\_LsgRNA64  
AGATCGGGGGTGTTCCTGCTCACAGGCC  
>CD33\_LsgRNA65  
GCAGCTGACAACCAGGAGAAGATCGGGGGT  
>CD33\_LsgRNA66  
GCTACTGCTGCCCCTGCTGTGGGCAGGTGA  
>CD33\_LsgRNA67  
TCACCTGTCACATGCACAGAGAGCTGGGGA  
>CD33\_LsgRNA68  
CGAACTTCACCTGACAGGTCAGGTTGGTGC  
>CD33\_LsgRNA69  
GGAGGAAAGCAGCCAGGACAGCAGTGGGCA  
>CD33\_LsgRNA70  
GCCAGAAATTTGGATCCATAGCCAGGGCCC  
>CD33\_LsgRNA71  
CAGGGAACACCCCGATCTTCTCCTGGTTG  
>CD33\_LsgRNA72  
TCAAGAAGTACAGGAGGAGACTCAGGGCAG  
>CD33\_LsgRNA73  
CTACGACAAGAACTCCCCAGTTCATGGTTA  
>CD33\_LsgRNA74  
ACCTGACAGGTCAGGTTGGTGCCGTGGTCC  
>CD33\_LsgRNA75  
CGTAGACGCCAGGAGGAGGGATAATGGTTC  
>CD33\_LsgRNA76  
TGAGGCAGAGACAAAGAGCGAGCAGGGCTG  
>CD33\_LsgRNA77  
CACAGCCACTCACCTGCCACAGCAGGGGC  
>CD33\_LsgRNA78  
TTCCGCCTCCTTGGGGATCCCAGTAGGAAC  
>CD33\_LsgRNA79  
TGCTGCTACTGCTGCCCCTGCTGTGGGCAG  
>CD33\_LsgRNA80  
ACAAGCTAGATCAAGAAGTACAGGAGGAGA  
>CD33\_LsgRNA81  
GGCAGCTGACAACCAGGAGAAGATCGGGGG  
>CD33\_LsgRNA82  
TCCGGGAAGGAGCCATTATATCCAGGGACT  
>CD33\_LsgRNA83  
AGCAGGAGTGTTTCATGGGGCCATTGGAGG

>CD33\_LsgRNA84  
ATGAGGCAGAGACAAAGAGCGAGCAGGGCT  
>CD33\_LsgRNA85  
GGGAGGCTGACCCTGTGGTAGGGTGGGTGT  
>CD33\_LsgRNA86  
TGCAGGGAAACAAGAGACCAGAGCAGGAGT  
>CD33\_LsgRNA87  
TTCCGGGAAGGAGCCATTATATCCAGGGAC  
>CD33\_LsgRNA88  
GCTGGGGAGATTTGTAAGTGTATTTGGTAC  
>CD33\_LsgRNA89  
ACCGGGGAGGCTGACCCTGTGGTAGGGTGG  
>CD33\_LsgRNA90  
CTCAGGGCAGATTCCGCCTCCTTGGGGATC  
>CD33\_LsgRNA91  
CACCGGGGAGGCTGACCCTGTGGTAGGGTG  
>CD33\_LsgRNA92  
AACTGGGGAGTTCTTGTTCGTAGTAGGGTAT  
>CD33\_LsgRNA93  
GGGAGGTGGGGGCAGCTGACAACCAGGAGA  
>CD33\_LsgRNA94  
GGTTGTCAGCTGCCCCACCTCCCTGGGCC  
>CD33\_LsgRNA95  
AGTAGTCCTGGGGCCAGGGAGGTGGGGGC  
>CD33\_LsgRNA96  
AGGAGTGAGTAGTCCTGGGGCCAGGGAGG  
>CD33\_LsgRNA97  
GTTGGTGCCGTGGTCCTGGGGCCGTGGGGT  
>CD33\_LsgRNA98  
AGGAGTGGTTCATGGGGCCATTGGAGGAGC  
>CD33\_LsgRNA99  
CTCTGTGTCCTGGGCCTGTGAGCAGGGAAC  
>CD33\_LsgRNA100  
CCGGGTCTAGAGTGCCAGGGATGAGGATT  
>CD33\_LsgRNA101  
ACCCTACCACAGGGTCAGCCTCCCCGGTGA  
>CD33\_LsgRNA102  
TTCTACTGGGATCCCCAAGGAGGCGGAAT  
>CD33\_LsgRNA103  
TTCATACTTCTTTTCGGATGGAGAGAGGAAG  
>CD33\_LsgRNA104  
GTTGTCAGCTGCCCCACCTCCCTGGGCC  
>CD33\_LsgRNA105  
CAGGTCAGGTTGGTGCCGTGGTCCTGGGGC

>CD33\_LsgRNA106  
 CAGCTCCAGCGAACTTCACCTGACAGGTCA  
 >CD33\_LsgRNA107  
 TTGTTCTACTGGGATCCCCAAGGAGGCGG  
 >CD33\_LsgRNA108  
 GCTGTCTGGCTGCTTTCCTCCTGTGGGTC  
 >CD33\_LsgRNA109  
 GTAGTCCTGGGGCCAGGGAGGTGGGGGCA  
 >CD33\_LsgRNA110  
 TTGATCTAGCTTGTGTTGTGGCCACTGGAGA  
 >CD33\_LsgRNA111  
 AGTATGAACCATTATCCCTCCTCCTGGCGT  
 >CD33\_LsgRNA112  
 CTCCTGCACTTGCAGCCAGAAATTTGGATC  
 >CD33\_LsgRNA113  
 AGGATGCCCCATCACTCACCGGGGAGGCTG  
 >CD33\_LsgRNA114  
 TTGGTGCCGTGGTCCTGGGGCCGTGGGGTG  
 >CD33\_LsgRNA115  
 CTGCTGCTACTGCTGCCCCTGCTGTGGGCA  
 >CD33\_LsgRNA116  
 CCACTGGAGAGTCCCTGGATATAATGGCTC  
 >CD33\_LsgRNA117  
 TCCCTGGATATAATGGCTCCTTCCCGAAC  
 >CD33\_LsgRNA118  
 GGAGTGGCCGGTTCTAGAGTGCCAGGGAT  
 >CD33\_LsgRNA119  
 GCCCTGGCTATGGATCCAAATTTCTGGCTG  
 >CD33\_LsgRNA120  
 GAACTGGGGAGTTCTTGTCTAGTAGGGTA  
 >CD33\_LsgRNA121  
 ATAATGGTTCATACTTCTTTCGGATGGAGA  
 >CD33\_LsgRNA122  
 GGGCTGTAACACCAGCTCCTCCAATGGCCC  
 >CD33\_LsgRNA123  
 GCTCTGTGTCCTGGGCCTGTGAGCAGGGAA  
 >CD33\_LsgRNA124  
 GGGGTGTTCCCTGCTCACAGGCCAGGACA  
 >CD33\_LsgRNA125  
 GTACTTCTTGATCTAGCTTGTGTTGTGGCCA  
 >CD33\_LsgRNA126  
 GGAGTTCTTGTCTAGTAGGGTATGGGATG

(21)  $S_4$ : 119 low on-target activity sgRNAs targeting CCDC101

>CCDC101\_LsgRNA1  
TGAGAAGTTCTGCAATGCGGGAATCGGCAG  
>CCDC101\_LsgRNA2  
CCCCACAGCCCCAGGATGACTACTCGGTCC  
>CCDC101\_LsgRNA3  
TCAAACAGGACCGAGTAGTCATCCTGGGGC  
>CCDC101\_LsgRNA4  
ACTCACAGGCCCCACCCCTCTGTGGGGCC  
>CCDC101\_LsgRNA5  
GTGAACATCCAGAAGACCCATGAGCGGATG  
>CCDC101\_LsgRNA6  
TGTCACCAGGCTTCCCGATCCACAGGGGCA  
>CCDC101\_LsgRNA7  
GGCCACGCAGCTTTGTCCGGTAATAGGGAG  
>CCDC101\_LsgRNA8  
TTCCACTGGGGCAGCGGGATGACACGGCGC  
>CCDC101\_LsgRNA9  
GTGTAGAGGCCACGCAGCTTTGTCCGGTAA  
>CCDC101\_LsgRNA10  
TAGAAGCAGGTAGTCTGGGGATACAGGGCC  
>CCDC101\_LsgRNA11  
GGGCAGCCACCTTGTCTCCAGGTCTGGCCA  
>CCDC101\_LsgRNA12  
GGGGAGGGGAATAGCCATCTGCATAGGAGG  
>CCDC101\_LsgRNA13  
GGCCATGACCCTGCCCTGTGGATCGGGAA  
>CCDC101\_LsgRNA14  
AGGGATGGCCCCACAGAGGGGTGGGGGCCT  
>CCDC101\_LsgRNA15  
AGTCATTGTAGAGACCGGCAATCTTGGCCG  
>CCDC101\_LsgRNA16  
GAGACAAGGTGGCTGCCCGGGTGAAGGCCG  
>CCDC101\_LsgRNA17  
CCCTCAATGTGGCTCAGAGATACGTGGTGG  
>CCDC101\_LsgRNA18  
TTGTCACCAGGCTTCCCGATCCACAGGGGC  
>CCDC101\_LsgRNA19  
CTCACAGGCCCCACCCCTCTGTGGGGCCA  
>CCDC101\_LsgRNA20  
TCTGCATAGGAGGTGTCTTCAAACAGGACC  
>CCDC101\_LsgRNA21  
GGGTCATCAGCACCCCTCTGCGCATGGTCT  
>CCDC101\_LsgRNA22  
CTGGCCACGTAGTCTCCTGAGGCAGGGATG

>CCDC101\_LsgRNA23  
GGATCCACTGCTCGTCCCCATCCACGGCCT  
>CCDC101\_LsgRNA24  
AGGGCCAGCACGAGCTGCTCCTTCTGGAAC  
>CCDC101\_LsgRNA25  
TCCCCCAGGAGACACACCCTGAGCCGGCGC  
>CCDC101\_LsgRNA26  
CCTTCCCACAGCGGCCAAGATTGCCGGTCT  
>CCDC101\_LsgRNA27  
CGTCCCCATCCACGGCCTTCACCCGGGCAG  
>CCDC101\_LsgRNA28  
TCGTCCCCATCCACGGCCTTCACCCGGGCA  
>CCDC101\_LsgRNA29  
GCCACCCCGGAAGACCATGCGCAGAGGGGT  
>CCDC101\_LsgRNA30  
AGCACCCCTCTGCGCATGGTCTTCCGGGGT  
>CCDC101\_LsgRNA31  
CCTGCCCTGTGGATCGGGAAGCCTGGTGA  
>CCDC101\_LsgRNA32  
CCACCCCGGAAGACCATGCGCAGAGGGGTG  
>CCDC101\_LsgRNA33  
GCTGCCCGGGTGAAGGCCGTGGATGGGGAC  
>CCDC101\_LsgRNA34  
GCACCCCTCTGCGCATGGTCTTCCGGGGTG  
>CCDC101\_LsgRNA35  
CGGACCCCTGAGGCCTTGTTCCAGAAGGAGC  
>CCDC101\_LsgRNA36  
CCATCCCTGCCTCAGGAGACTACGTGGCCA  
>CCDC101\_LsgRNA37  
GGCGCCGGCTCAGGGTGTGTCTCCTGGGGG  
>CCDC101\_LsgRNA38  
CTGCCCGGGTGAAGGCCGTGGATGGGGACG  
>CCDC101\_LsgRNA39  
AAGGCCGTGGATGGGGACGAGCAGTGGATC  
>CCDC101\_LsgRNA40  
CACCCCTCTGCGCATGGTCTTCCGGGGTGG  
>CCDC101\_LsgRNA41  
TTTTCTTACAGGAAGAGCGTTCGCGGAGC  
>CCDC101\_LsgRNA42  
TGCTCCTTCTGGAACAAGGCCTCAGGGTCC  
>CCDC101\_LsgRNA43  
GGGACGAGCAGTGGATCCTGGCCGAGGTGG  
>CCDC101\_LsgRNA44  
GCCACGCAGCTTTGTCCGGTAATAGGGAGA

>CCDC101\_LsgRNA45  
AGATCGCGGAAATCAAGTCTCTGTTGGAAG  
>CCDC101\_LsgRNA46  
AGGGCGCGGTAGAAGCAGGTAGTCTGGGGA  
>CCDC101\_LsgRNA47  
CAGTCGGCCATGACCCTGCCCTGTGGATC  
>CCDC101\_LsgRNA48  
GCATCGGCCTTGGCGGTTGTGTAGAGGCCA  
>CCDC101\_LsgRNA49  
GCGCCGGCTCAGGGTGTGTCTCCTGGGGGA  
>CCDC101\_LsgRNA50  
CACCCGGCAGCCACCTTGTCTCCAGGTCT  
>CCDC101\_LsgRNA51  
ACCACGTATCTCTGAGCCACATTGAGGGGA  
>CCDC101\_LsgRNA52  
ACTACGTGGCCAGACCTGGAGACAAGGTGG  
>CCDC101\_LsgRNA53  
TGCACTCAGCCTCTGCATCGGCCTTGGCGG  
>CCDC101\_LsgRNA54  
CCGTCTCCGGGTTGGCCTTCCACTGGGGCA  
>CCDC101\_LsgRNA55  
GTATCTCTGAGCCACATTGAGGGGAGGGGA  
>CCDC101\_LsgRNA56  
TGTTCTCTGTCTGCATCCGCTCATGGGTCT  
>CCDC101\_LsgRNA57  
TCCTCTGCAGTTTCTCCCTATTACCGGACA  
>CCDC101\_LsgRNA58  
CCCTCTGCGCATGGTCTTCCGGGGTGGCTC  
>CCDC101\_LsgRNA59  
AGACCTGGAGACAAGGTGGCTGCCCGGGTG  
>CCDC101\_LsgRNA60  
AGCTCTGTGAGAAGTTCTGCAATGCGGGAA  
>CCDC101\_LsgRNA61  
GTCTCTGTTGGAAGAGAGCGGATTGGTGA  
>CCDC101\_LsgRNA62  
CAGGCTTCCCGATCCACAGGGGCAGGGTCA  
>CCDC101\_LsgRNA63  
CTCACTTGCACTCAGCCTCTGCATCGGCCT  
>CCDC101\_LsgRNA64  
GTTTGAAGACACCTCCTATGCAGATGGCTA  
>CCDC101\_LsgRNA65  
CTCAGAGATACGTGGTGGCTTGTAAGGAAC  
>CCDC101\_LsgRNA66  
GCACGAGCTGCTCCTTCTGGAACAAGGCCT

>CCDC101\_LsgRNA67  
TCCCGATCCACAGGGGCAGGGTCATGGCCG  
>CCDC101\_LsgRNA68  
CCCTGATCCATGCGCCCCACAGCGGGTAA  
>CCDC101\_LsgRNA69  
GCGGGATGACACGGCGCCGGCTCAGGGTGT  
>CCDC101\_LsgRNA70  
TGCTGATGACCCTGCTGCAGCAGTCGGCCA  
>CCDC101\_LsgRNA71  
CAGGGATGGCCCCACAGAGGGGTGGGGGCC  
>CCDC101\_LsgRNA72  
TGGGGCAGCGGGATGACACGGCGCCGGCTC  
>CCDC101\_LsgRNA73  
TGAGGCAGGGATGGCCCCACAGAGGGTGG  
>CCDC101\_LsgRNA74  
GTCTGCATCCGCTCATGGGTCTTCTGGATG  
>CCDC101\_LsgRNA75  
TCTGGCCACGTAGTCTCCTGAGGCAGGGAT  
>CCDC101\_LsgRNA76  
CGCTGCCCCAGTGAAGGCCAACCCGGAGA  
>CCDC101\_LsgRNA77  
GGCTGCCCCGGGTGAAGGCCGTGGATGGGGA  
>CCDC101\_LsgRNA78  
CAATGCGGGAATCGGCAGACACGAGGGCCA  
>CCDC101\_LsgRNA79  
GGGCGCGGTAGAAGCAGGTAGTCTGGGGAT  
>CCDC101\_LsgRNA80  
ACCCGCTGTGGGGGCGCATGGATCAGGGCG  
>CCDC101\_LsgRNA81  
CCAGGCTTCCCGATCCACAGGGGCAGGGTC  
>CCDC101\_LsgRNA82  
GAGGGGAATAGCCATCTGCATAGGAGGTGT  
>CCDC101\_LsgRNA83  
CTCAGGAGACTACGTGGCCAGACCTGGAGA  
>CCDC101\_LsgRNA84  
CCCTGGAGGCTGCTTTACCCGCTGTGGGGG  
>CCDC101\_LsgRNA85  
CTGAGGCAGGGATGGCCCCACAGAGGGGTG  
>CCDC101\_LsgRNA86  
ACGTGGCCAGACCTGGAGACAAGGTGGCTG  
>CCDC101\_LsgRNA87  
AGGTGGCTGCCCGGGTGAAGGCCGTGGATG  
>CCDC101\_LsgRNA88  
GGCAGGGATGGCCCCACAGAGGGGTGGGGG

>CCDC101\_LsgRNA89  
TGTGGGGGCGCATGGATCAGGGCGCGGTAG  
>CCDC101\_LsgRNA90  
ACCTGGGTTTGTGGATCAGCTGATGGAGC  
>CCDC101\_LsgRNA91  
CCAGGGTTGGTGTCACTCACTTGTGGTGG  
>CCDC101\_LsgRNA92  
TGAGGTAGATGACATCGATGAAGAAGGCAA  
>CCDC101\_LsgRNA93  
CCACGTAGTCTCCTGAGGCAGGGATGGCCC  
>CCDC101\_LsgRNA94  
CCACGTATCTCTGAGCCACATTGAGGGGAG  
>CCDC101\_LsgRNA95  
CCCAGTGAAGGCCAACCCGGAGACGGACC  
>CCDC101\_LsgRNA96  
CGCCGTGTCATCCCGCTGCCCCAGTGAAG  
>CCDC101\_LsgRNA97  
CACGTATCTCTGAGCCACATTGAGGGGAGG  
>CCDC101\_LsgRNA98  
TCCCTATTACCGGACAAAGCTGCGTGGCCT  
>CCDC101\_LsgRNA99  
GAAATCAAGTCTCTGTTGGAAGAGAGGCGG  
>CCDC101\_LsgRNA100  
GGTGTCACTCACTTGTGGTGGCATGGCTG  
>CCDC101\_LsgRNA101  
AGGGTCATGGCCGACTGCTGCAGCAGGGTC  
>CCDC101\_LsgRNA102  
CTTCTCCCCGCCCTCAGCATCCTTCGGAAA  
>CCDC101\_LsgRNA103  
CTGCTCCTTCTGGAACAAGGCCTCAGGGTC  
>CCDC101\_LsgRNA104  
CCTGTCTGCCTGCCCCACAGCCCCAGGATG  
>CCDC101\_LsgRNA105  
GCCATGACCCTGCCCCTGTGGATCGGGAAG  
>CCDC101\_LsgRNA106  
GCCCTGATCCATGCGCCCCACAGCGGGTA  
>CCDC101\_LsgRNA107  
AGATTGCCGGTCTCTACAATGACTCGGAGC  
>CCDC101\_LsgRNA108  
GCAATGCGGGAATCGGCAGACACGAGGGCC  
>CCDC101\_LsgRNA109  
CAGCTGCTGCCCTCACTTGTCCACCAGGCTT  
>CCDC101\_LsgRNA110  
TGCGTGGCCTCTACACAACCGCCAAGGCCG



```

>CCDC101_LsgRNA111
GGGTTGGCCTTCCACTGGGGCAGCGGGATG
>CCDC101_LsgRNA112
TGGATGGGGACGAGCAGTGGATCCTGGCCG
>CCDC101_LsgRNA113
GGGTTGGTGTCACTCACTTGGTGGTGGCAT
>CCDC101_LsgRNA114
TGGCTGTAACTGACCACCTCGGCCAGGATC
>CCDC101_LsgRNA115
GCTCTGTGAGAAGTTCTGCAATGCGGGAAT
>CCDC101_LsgRNA116
TCAATGTGGCTCAGAGATACGTGGTGGCTT
>CCDC101_LsgRNA117
CCTCTGTGGGGCCATCCCTGCCTCAGGAGA
>CCDC101_LsgRNA118
TGCTTTACCCGCTGTGGGGGCGCATGGATC
>CCDC101_LsgRNA119
CGGGTTGGCCTTCCACTGGGGCAGCGGGAT

```

(22)  $S_5^-$ : 1478 low on-target activity sgRNAs targeting MED12

```

>MED12_LsgRNA1
GCCAAAAACCAGGGGCCGGTGCTGAGGGCA
>MED12_LsgRNA2
GCCAAAAACCAGGGGCCGGTGCTGAGGGCA
>MED12_LsgRNA3
TGAGAAACATAAGGAGTATAGCCCTGGAGG
>MED12_LsgRNA4
TGAGAAACATAAGGAGTATAGCCCTGGAGG
>MED12_LsgRNA5
CCAAAAACCAGGGGCCGGTGCTGAGGGCAC
>MED12_LsgRNA6
CCAAAAACCAGGGGCCGGTGCTGAGGGCAC
>MED12_LsgRNA7
TGTTAAAGGCTGCTGGGGAAGAATTGGAGA
>MED12_LsgRNA8
TGTTAAAGGCTGCTGGGGAAGAATTGGAGA
>MED12_LsgRNA9
CCGCAAAGGGACAGCAGAACTGGTGGGTT
>MED12_LsgRNA10
CCGCAAAGGGACAGCAGAACTGGTGGGTT
>MED12_LsgRNA11
GAGGAACAGAAGAACTTCCAGAGGAGGAGG
>MED12_LsgRNA12
CAGCAACAGACAGCAGCTTTGGTCCGGCAA

```

>MED12\_LsgRNA13  
CAGCAACAGACAGCAGCTTTGGTCCGGCAA  
>MED12\_LsgRNA14  
GGTCAACATGTCTCTTCTTAACCTTGGTCT  
>MED12\_LsgRNA15  
GGTCAACATGTCTCTTCTTAACCTTGGTCT  
>MED12\_LsgRNA16  
ATAGAACCAGGGTTTGGGTGGTGCAGGAGG  
>MED12\_LsgRNA17  
ATAGAACCAGGGTTTGGGTGGTGCAGGAGG  
>MED12\_LsgRNA18  
CTTCAACCCCTCAAAAAGATCCCAGGGCGA  
>MED12\_LsgRNA19  
TTCGAACGCACCTCCTTCTGTTTGGGGTCC  
>MED12\_LsgRNA20  
TTCGAACGCACCTCCTTCTGTTTGGGGTCC  
>MED12\_LsgRNA21  
CCTTAACTACAGGCAAGGCTCCATAGGCCT  
>MED12\_LsgRNA22  
CCTTAACTACAGGCAAGGCTCCATAGGCCT  
>MED12\_LsgRNA23  
GATGAACTGCACATGCTGCACCAGAGGCAA  
>MED12\_LsgRNA24  
GATGAACTGCACATGCTGCACCAGAGGCAA  
>MED12\_LsgRNA25  
TTTCAACTGTCCCCTCAGGTGGGGAGGATG  
>MED12\_LsgRNA26  
TTTCAACTGTCCCCTCAGGTGGGGAGGATG  
>MED12\_LsgRNA27  
TAGGAAGAGCTGGGAGTCATCTGATGGACA  
>MED12\_LsgRNA28  
TAGGAAGAGCTGGGAGTCATCTGATGGACA  
>MED12\_LsgRNA29  
GCTGAAGCCCCTGGCGCTGGAAGTGGGTGG  
>MED12\_LsgRNA30  
GCTGAAGCCCCTGGCGCTGGAAGTGGGTGG  
>MED12\_LsgRNA31  
AAGCAAGGATACAGCGCTCTGCAGAGGAGC  
>MED12\_LsgRNA32  
TGGTAAGGCTGGCTGGAGTAGCTGGGGGGC  
>MED12\_LsgRNA33  
TGGTAAGGCTGGCTGGAGTAGCTGGGGGGC  
>MED12\_LsgRNA34  
TTTCAATAACCAGCCTGCTGTCTCTGGGGA

>MED12\_LsgRNA35  
TTTCAATAACCAGCCTGCTGTCTCTGGGGA  
>MED12\_LsgRNA36  
TCCAAATATGTTGGTACTGGGCTGTGGCTG  
>MED12\_LsgRNA37  
TCCAAATATGTTGGTACTGGGCTGTGGCTG  
>MED12\_LsgRNA38  
AGAAAATCACCAAGGATATCTTGAAGGTTC  
>MED12\_LsgRNA39  
AGAAAATCACCAAGGATATCTTGAAGGTTC  
>MED12\_LsgRNA40  
CTGCAATCCCACATGAGAAACATAAGGAGT  
>MED12\_LsgRNA41  
CTGCAATCCCACATGAGAAACATAAGGAGT  
>MED12\_LsgRNA42  
ATGAAATCCCAGTGCCTTACCCGCAGGATC  
>MED12\_LsgRNA43  
ATGAAATCCCAGTGCCTTACCCGCAGGATC  
>MED12\_LsgRNA44  
CTCCAATGAGTGCCAGGGCGTCCAGGCAG  
>MED12\_LsgRNA45  
CTCCAATGAGTGCCAGGGCGTCCAGGCAG  
>MED12\_LsgRNA46  
GCAGACAAAGCTGTAGCGGTTAGCAGGGTT  
>MED12\_LsgRNA47  
GCAGACAAAGCTGTAGCGGTTAGCAGGGTT  
>MED12\_LsgRNA48  
AAGAACAATTTGGGGAGCTCTTCAGGTAA  
>MED12\_LsgRNA49  
AAGAACAATTTGGGGAGCTCTTCAGGTAA  
>MED12\_LsgRNA50  
GCCCACAACCATGACTGGCGTCATGGGTTT  
>MED12\_LsgRNA51  
GCCCACAACCATGACTGGCGTCATGGGTTT  
>MED12\_LsgRNA52  
ATCTACAAGAGTAGGATTGGTAGAAGGGTG  
>MED12\_LsgRNA53  
ATCTACAAGAGTAGGATTGGTAGAAGGGTG  
>MED12\_LsgRNA54  
TATAACACACCTTAACTACAGGCAAGGCTC  
>MED12\_LsgRNA55  
TATAACACACCTTAACTACAGGCAAGGCTC  
>MED12\_LsgRNA56  
GCAAACACGGCTCCATCCACGATGCGGTTC

>MED12\_LsgRNA57  
GTACACAGAGGTCTTATAAGAGGAGGGTTC  
>MED12\_LsgRNA58  
GTACACAGAGGTCTTATAAGAGGAGGGTTC  
>MED12\_LsgRNA59  
TCACACAGGACTATGGAATGGGCCCGGGTC  
>MED12\_LsgRNA60  
TCACACAGGACTATGGAATGGGCCCGGGTC  
>MED12\_LsgRNA61  
AGAGACAGGCGGAGATTGAGGCTGAGGTTA  
>MED12\_LsgRNA62  
AGAGACAGGCGGAGATTGAGGCTGAGGTTA  
>MED12\_LsgRNA63  
AACCACAGGGGATGCGGAACTGAAAGGTTC  
>MED12\_LsgRNA64  
AACCACAGGGGATGCGGAACTGAAAGGTTC  
>MED12\_LsgRNA65  
TGACACATACCTGCAGTAGCTTCTGGCAT  
>MED12\_LsgRNA66  
TGACACATACCTGCAGTAGCTTCTGGCAT  
>MED12\_LsgRNA67  
ATCCACATCGACTGCTGGACAATGAGGATG  
>MED12\_LsgRNA68  
ATCCACATCGACTGCTGGACAATGAGGATG  
>MED12\_LsgRNA69  
GTAAACATCGGGAGGCCCCAGCCGCGGCCG  
>MED12\_LsgRNA70  
GTAAACATCGGGAGGCCCCAGCCGCGGCCG  
>MED12\_LsgRNA71  
CTCGACATCTGGCTTCTCAGGGGATGGACT  
>MED12\_LsgRNA72  
CTCGACATCTGGCTTCTCAGGGGATGGACT  
>MED12\_LsgRNA73  
TGGAACATGCCTCCTTCTTGAAGATGGAAT  
>MED12\_LsgRNA74  
TGGAACATGCCTCCTTCTTGAAGATGGAAT  
>MED12\_LsgRNA75  
TAACACATGTCCCTGGACTGAGGTGGGCAG  
>MED12\_LsgRNA76  
TAACACATGTCCCTGGACTGAGGTGGGCAG  
>MED12\_LsgRNA77  
AGGGACATGTGTTAAAGGCTGCTGGGGAAG  
>MED12\_LsgRNA78  
AGGGACATGTGTTAAAGGCTGCTGGGGAAG

>MED12\_LsgRNA79  
GCAAACCAAAGCAGCTTATGCATGAGGCAC  
>MED12\_LsgRNA80  
GCAAACCAAAGCAGCTTATGCATGAGGCAC  
>MED12\_LsgRNA81  
CGATACCAAGGGCAACAAGATTGCTGGCTT  
>MED12\_LsgRNA82  
CGATACCAAGGGCAACAAGATTGCTGGCTT  
>MED12\_LsgRNA83  
GTGAACCAAGTGTTAATGGCACTCTGGGAT  
>MED12\_LsgRNA84  
GTGAACCAAGTGTTAATGGCACTCTGGGAT  
>MED12\_LsgRNA85  
TGAAACCACAAGTGCCATTGTTAGAGGAGC  
>MED12\_LsgRNA86  
TGAAACCACAAGTGCCATTGTTAGAGGAGC  
>MED12\_LsgRNA87  
CTCTACCACACACACCTGAGGCCCGGCC  
>MED12\_LsgRNA88  
CTCTACCACACACACCTGAGGCCCGGCC  
>MED12\_LsgRNA89  
ATACACCAGAGCGCTCTAGAGAGCTGGAGA  
>MED12\_LsgRNA90  
ATACACCAGAGCGCTCTAGAGAGCTGGAGA  
>MED12\_LsgRNA91  
TTCCACCCGCTCACTCTCACTTCGAGGGTC  
>MED12\_LsgRNA92  
TTCCACCCGCTCACTCTCACTTCGAGGGTC  
>MED12\_LsgRNA93  
GCGGACCCTCGAAGTGAGAGTGAGCGGGTG  
>MED12\_LsgRNA94  
GCGGACCCTCGAAGTGAGAGTGAGCGGGTG  
>MED12\_LsgRNA95  
GATGACCCTGTCTCTGCTGACTGTTGGAAA  
>MED12\_LsgRNA96  
GATGACCCTGTCTCTGCTGACTGTTGGAAA  
>MED12\_LsgRNA97  
GAACACCGGCCCTGAAGCGGCCGCGGCTG  
>MED12\_LsgRNA98  
GAACACCGGCCCTGAAGCGGCCGCGGCTG  
>MED12\_LsgRNA99  
TGGGACCTAGCAAGGATGGGCATGAGGTAA  
>MED12\_LsgRNA100  
TGGGACCTAGCAAGGATGGGCATGAGGTAA

>MED12\_LsgRNA101  
GCTTACCTCATGCCCATCCTTGCTAGGTCC  
>MED12\_LsgRNA102  
GCTTACCTCATGCCCATCCTTGCTAGGTCC  
>MED12\_LsgRNA103  
TCACACCTTCACCTACACGGGGCTAGGCAA  
>MED12\_LsgRNA104  
TCACACCTTCACCTACACGGGGCTAGGCAA  
>MED12\_LsgRNA105  
AGCTACGAACACCGGCCCTGAAGCGGCCG  
>MED12\_LsgRNA106  
AGCTACGAACACCGGCCCTGAAGCGGCCG  
>MED12\_LsgRNA107  
AGGAACGCAAGAAGAAGTCCACCAAGGGCA  
>MED12\_LsgRNA108  
AGGAACGCAAGAAGAAGTCCACCAAGGGCA  
>MED12\_LsgRNA109  
GTACACGGAGACTGGCCCTGCAGCTGGATG  
>MED12\_LsgRNA110  
GTACACGGAGACTGGCCCTGCAGCTGGATG  
>MED12\_LsgRNA111  
AGGCACTAGGACAGCACAGGAGGATGGTCT  
>MED12\_LsgRNA112  
AGGCACTAGGACAGCACAGGAGGATGGTCT  
>MED12\_LsgRNA113  
CCCTACTATGCCCTGTGAGGGGAAGGGCAG  
>MED12\_LsgRNA114  
CCCTACTATGCCCTGTGAGGGGAAGGGCAG  
>MED12\_LsgRNA115  
CAGGACTATGGAATGGGCCCGGTTCGGAGC  
>MED12\_LsgRNA116  
CAGGACTATGGAATGGGCCCGGTTCGGAGC  
>MED12\_LsgRNA117  
AGGCACTCAAACCTGCGGCTCAACCTGGTGA  
>MED12\_LsgRNA118  
AGGCACTCAAACCTGCGGCTCAACCTGGTGA  
>MED12\_LsgRNA119  
TGCCACTCACACAGGACTATGGAATGGGCC  
>MED12\_LsgRNA120  
TGCCACTCACACAGGACTATGGAATGGGCC  
>MED12\_LsgRNA121  
TGGCACTCACCTGCAGGTAGTGGCTGGTTC  
>MED12\_LsgRNA122  
AGCCACTCACGCAACTAGCCAAAAAGGTAA

>MED12\_LsgRNA123  
AGCCACTCACGCAACTAGCCAAAAAGGTAA  
>MED12\_LsgRNA124  
CTGCACTCAGTGACTTGCAATAGCCGGTCA  
>MED12\_LsgRNA125  
CTATACTCCTTATGTTTCTCATGTGGGATT  
>MED12\_LsgRNA126  
CTATACTCCTTATGTTTCTCATGTGGGATT  
>MED12\_LsgRNA127  
ACTGACTGATAGCAGAATTAAGACCGGCTC  
>MED12\_LsgRNA128  
ACTGACTGATAGCAGAATTAAGACCGGCTC  
>MED12\_LsgRNA129  
ATCGACTGCTGGACAATGAGGATGGGGAAA  
>MED12\_LsgRNA130  
ATCGACTGCTGGACAATGAGGATGGGGAAA  
>MED12\_LsgRNA131  
GGGTACTTCATACTTTGGAAGTGCTGGACA  
>MED12\_LsgRNA132  
GGGTACTTCATACTTTGGAAGTGCTGGACA  
>MED12\_LsgRNA133  
TAACACTTGGTTCACTGACTTGGCTGGCAC  
>MED12\_LsgRNA134  
TAACACTTGGTTCACTGACTTGGCTGGCAC  
>MED12\_LsgRNA135  
GAGCAGAAAGGGAGCCAGAGGCGATGGAAC  
>MED12\_LsgRNA136  
GAGCAGAAAGGGAGCCAGAGGCGATGGAAC  
>MED12\_LsgRNA137  
GAACAGAAGAACTTCCAGAGGAGGAGGGAG  
>MED12\_LsgRNA138  
GAACAGAAGAACTTCCAGAGGAGGAGGGAG  
>MED12\_LsgRNA139  
TTACAGAAGATGGCTGAATACTACCGGCCA  
>MED12\_LsgRNA140  
TTACAGAAGATGGCTGAATACTACCGGCCA  
>MED12\_LsgRNA141  
AAGGAGAAGATTGAAGGGACCTTGGGGTT  
>MED12\_LsgRNA142  
AAGGAGAAGATTGAAGGGACCTTGGGGTT  
>MED12\_LsgRNA143  
GATAAGAAGGGCTGCTGGCTCAATAGGGAC  
>MED12\_LsgRNA144  
GATAAGAAGGGCTGCTGGCTCAATAGGGAC

>MED12\_LsgRNA145  
TCAAAGACCTGTGCCATCTGGTCCTGGTTG  
>MED12\_LsgRNA146  
TCAAAGACCTGTGCCATCTGGTCCTGGTTG  
>MED12\_LsgRNA147  
CTCTAGAGCGCTCTGGTGTATGGCTGGTGG  
>MED12\_LsgRNA148  
CTCTAGAGCGCTCTGGTGTATGGCTGGTGG  
>MED12\_LsgRNA149  
CTAGAGAGCTGTTGTTGAAGTTGCCGGACC  
>MED12\_LsgRNA150  
CTAGAGAGCTGTTGTTGAAGTTGCCGGACC  
>MED12\_LsgRNA151  
AGGGAGAGGGAGGCCGGGGACCAGGGGCTC  
>MED12\_LsgRNA152  
AGGGAGAGGGAGGCCGGGGACCAGGGGCTC  
>MED12\_LsgRNA153  
ATGTAGAGGTGGCAATCCGGCAGTGGGATT  
>MED12\_LsgRNA154  
ATGTAGAGGTGGCAATCCGGCAGTGGGATT  
>MED12\_LsgRNA155  
CTCTAGAGTGTTCGATCATGAACTCAGGTGC  
>MED12\_LsgRNA156  
CTCTAGAGTGTTCGATCATGAACTCAGGTGC  
>MED12\_LsgRNA157  
ACTCAGATCATCACCAAGTACTTATGGGAG  
>MED12\_LsgRNA158  
ACTCAGATCATCACCAAGTACTTATGGGAG  
>MED12\_LsgRNA159  
CCAGAGATCTGTACCTGGTGCACCTGGCTG  
>MED12\_LsgRNA160  
CCAGAGATCTGTACCTGGTGCACCTGGCTG  
>MED12\_LsgRNA161  
ACTTAGCAAAGATATCTTCAGCAGTGGGGA  
>MED12\_LsgRNA162  
ACTTAGCAAAGATATCTTCAGCAGTGGGGA  
>MED12\_LsgRNA163  
CAGCAGCAGCAGCAGCAGATCCTGCGGGTA  
>MED12\_LsgRNA164  
CAGCAGCAGCAGCAGCAGATCCTGCGGGTA  
>MED12\_LsgRNA165  
CAGCAGCAGCAGCAGTACCACATCCGGCAG  
>MED12\_LsgRNA166  
CAGCAGCAGCAGCAGTACCACATCCGGCAG



>MED12\_LsgRNA167  
ACATAGCCACTGGGCCGCTGTTGCAGGTGG  
>MED12\_LsgRNA168  
ACATAGCCACTGGGCCGCTGTTGCAGGTGG  
>MED12\_LsgRNA169  
AGGCAGCCAGCAGGTGGCGGTTCGCAGGAGG  
>MED12\_LsgRNA170  
AGGCAGCCAGCAGGTGGCGGTTCGCAGGAGG  
>MED12\_LsgRNA171  
CTGTAGCCATTTAAAGAACAAATTTGGGGA  
>MED12\_LsgRNA172  
CTGTAGCCATTTAAAGAACAAATTTGGGGA  
>MED12\_LsgRNA173  
GAGCAGCCCCGGTTTGTTCAGTTTGGGGG  
>MED12\_LsgRNA174  
GAGCAGCCCCGGTTTGTTCAGTTTGGGGG  
>MED12\_LsgRNA175  
TTGAAGCCGTCAGCACCCTCTCTTGGGGC  
>MED12\_LsgRNA176  
TTGAAGCCGTCAGCACCCTCTCTTGGGGC  
>MED12\_LsgRNA177  
TCCAAGCCTTACTCGGAGAAGCAGAGGCAG  
>MED12\_LsgRNA178  
TCCAAGCCTTACTCGGAGAAGCAGAGGCAG  
>MED12\_LsgRNA179  
AACCAGCGTTGGTTCGTACTGTTTGGGGTG  
>MED12\_LsgRNA180  
AACCAGCGTTGGTTCGTACTGTTTGGGGTG  
>MED12\_LsgRNA181  
CAGCAGCTACCTGGGGCTGGGACTGGGGCT  
>MED12\_LsgRNA182  
CAGCAGCTACCTGGGGCTGGGACTGGGGCT  
>MED12\_LsgRNA183  
CTGCAGCTCACACCTTACCTACACGGGGC  
>MED12\_LsgRNA184  
CTGCAGCTCACACCTTACCTACACGGGGC  
>MED12\_LsgRNA185  
CAGGAGGAACAGAAGAACTTCCAGAGGAGG  
>MED12\_LsgRNA186  
CAGGAGGAACAGAAGAACTTCCAGAGGAGG  
>MED12\_LsgRNA187  
GAACAGGACTCTGAGCCAGGGGCCCGGCTT  
>MED12\_LsgRNA188  
GAACAGGACTCTGAGCCAGGGGCCCGGCTT

>MED12\_LsgRNA189  
CTGCAGGAGGACATCCTGGAAAATGGGAGC  
>MED12\_LsgRNA190  
CTGCAGGAGGACATCCTGGAAAATGGGAGC  
>MED12\_LsgRNA191  
GGGTAGGATCTACAAGAGTAGGATTGGTAG  
>MED12\_LsgRNA192  
GGGTAGGATCTACAAGAGTAGGATTGGTAG  
>MED12\_LsgRNA193  
TGGCAGGATTGAAGCTGACGTTCTTGGCAC  
>MED12\_LsgRNA194  
TGGCAGGATTGAAGCTGACGTTCTTGGCAC  
>MED12\_LsgRNA195  
GTCCAGGCACTACTCACATTGTTAGGGGTC  
>MED12\_LsgRNA196  
GTCCAGGCACTACTCACATTGTTAGGGGTC  
>MED12\_LsgRNA197  
CTGAAGGCAGCAGCAGCAGCAAGCTGGAAG  
>MED12\_LsgRNA198  
TAATAGGCGCGGGGCCGGGGCCTCAGGTGT  
>MED12\_LsgRNA199  
TAATAGGCGCGGGGCCGGGGCCTCAGGTGT  
>MED12\_LsgRNA200  
GAGCAGGCGGCTCCTCATCTTCTGGGGGCA  
>MED12\_LsgRNA201  
GAGCAGGCGGCTCCTCATCTTCTGGGGGCA  
>MED12\_LsgRNA202  
GGTAAGGCTGGCTGGAGTAGCTGGGGGGCA  
>MED12\_LsgRNA203  
GGTAAGGCTGGCTGGAGTAGCTGGGGGGCA  
>MED12\_LsgRNA204  
GCACAGGCTTGGTCTTGCTGCTGCTGGGCA  
>MED12\_LsgRNA205  
GCACAGGCTTGGTCTTGCTGCTGCTGGGCA  
>MED12\_LsgRNA206  
TGAAAGGGCAGGATGAACAACGCGAGGGAC  
>MED12\_LsgRNA207  
TGAAAGGGCAGGATGAACAACGCGAGGGAC  
>MED12\_LsgRNA208  
CTCCAGGTAATAGGCGCGGGGCCGGGGCCT  
>MED12\_LsgRNA209  
CTCCAGGTAATAGGCGCGGGGCCGGGGCCT  
>MED12\_LsgRNA210  
AAGCAGGTCACTAAAGGGAGTCGAGGGTGT

>MED12\_LsgRNA211  
AAGCAGGTCACTAAAGGGAGTCGAGGGTGT  
>MED12\_LsgRNA212  
GTGTAGGTGAAGGTGTGAGCTGCAGGGTTC  
>MED12\_LsgRNA213  
GTGTAGGTGAAGGTGTGAGCTGCAGGGTTC  
>MED12\_LsgRNA214  
ACTGAGGTGGGCAGTTTAGCAATGAGGGGG  
>MED12\_LsgRNA215  
TTTCAGTAAGAAGGAAGAGGTGTTTGGGTA  
>MED12\_LsgRNA216  
TTTCAGTAAGAAGGAAGAGGTGTTTGGGTA  
>MED12\_LsgRNA217  
CAAGAGTAGGATTGGTAGAAGGGTGGGTGC  
>MED12\_LsgRNA218  
CAAGAGTAGGATTGGTAGAAGGGTGGGTGC  
>MED12\_LsgRNA219  
CAGAAGTAGGCAAGCCGGCGGGACAGGTAT  
>MED12\_LsgRNA220  
CAGAAGTAGGCAAGCCGGCGGGACAGGTAT  
>MED12\_LsgRNA221  
CTGAAGTCAGAGCGTTCAAACTATGGCTG  
>MED12\_LsgRNA222  
CTGAAGTCAGAGCGTTCAAACTATGGCTG  
>MED12\_LsgRNA223  
CCTCAGTCCAGGGACATGTGTTAAAGGCTG  
>MED12\_LsgRNA224  
CCTCAGTCCAGGGACATGTGTTAAAGGCTG  
>MED12\_LsgRNA225  
GAACAGTCCGAGTGGACCGGCGAGTGGCTC  
>MED12\_LsgRNA226  
GAACAGTCCGAGTGGACCGGCGAGTGGCTC  
>MED12\_LsgRNA227  
TTGTAGTGAACAGGACTCTGAGCCAGGGGC  
>MED12\_LsgRNA228  
TTGTAGTGAACAGGACTCTGAGCCAGGGGC  
>MED12\_LsgRNA229  
TGAGAGTGCAAGTATACATGTTGTGGGAGA  
>MED12\_LsgRNA230  
AATGAGTGCCAGGGCGTCCAGGCAGGCGT  
>MED12\_LsgRNA231  
AATGAGTGCCAGGGCGTCCAGGCAGGCGT  
>MED12\_LsgRNA232  
TCCTAGTGGCTGGCACTCACCTGCAGGTAG

>MED12\_LsgRNA233  
TCCTAGTGGCTGGCACTCACCTGCAGGTAG  
>MED12\_LsgRNA234  
CAGAAGTTATCCTTCTGGTTCACCTGGGGC  
>MED12\_LsgRNA235  
CAGAAGTTATCCTTCTGGTTCACCTGGGGC  
>MED12\_LsgRNA236  
TGCTAGTTGGGGGCTGAGGAGCAGGGGTGG  
>MED12\_LsgRNA237  
TGCTAGTTGGGGGCTGAGGAGCAGGGGTGG  
>MED12\_LsgRNA238  
TTCAATAACCAGCCTGCTGTCTCTGGGGAT  
>MED12\_LsgRNA239  
TTCAATAACCAGCCTGCTGTCTCTGGGGAT  
>MED12\_LsgRNA240  
GATCATCAAAGGGAGAGGGAGGCCGGGGAC  
>MED12\_LsgRNA241  
GATCATCAAAGGGAGAGGGAGGCCGGGGAC  
>MED12\_LsgRNA242  
GTTCGATCACGTTCTTTGCGTGAAGAGGAAC  
>MED12\_LsgRNA243  
GTTCGATCACGTTCTTTGCGTGAAGAGGAAC  
>MED12\_LsgRNA244  
GAGAATCAGAAGCCGCAGATGAGAAGGGTT  
>MED12\_LsgRNA245  
GAGAATCAGAAGCCGCAGATGAGAAGGGTT  
>MED12\_LsgRNA246  
CCCAATCCAAAGATTTCGGTTACAAAGGGAG  
>MED12\_LsgRNA247  
CCCAATCCAAAGATTTCGGTTACAAAGGGAG  
>MED12\_LsgRNA248  
CTCCATCCACGATGCGGTTCTGGGAGGCAG  
>MED12\_LsgRNA249  
TGCCATCCCTTCACTCCTTAATGCTGGTGA  
>MED12\_LsgRNA250  
TGCCATCCCTTCACTCCTTAATGCTGGTGA  
>MED12\_LsgRNA251  
TTCTATCCGACCTGAGCACAGGCTTGGTCT  
>MED12\_LsgRNA252  
TTCTATCCGACCTGAGCACAGGCTTGGTCT  
>MED12\_LsgRNA253  
GGACATCCTGGAAAATGGGAGCACTGGGAG  
>MED12\_LsgRNA254  
GGACATCCTGGAAAATGGGAGCACTGGGAG

>MED12\_LsgRNA255  
CCTCATCGACTTTGCCATTTCAGGTGGGGAA  
>MED12\_LsgRNA256  
CCTCATCGACTTTGCCATTTCAGGTGGGGAA  
>MED12\_LsgRNA257  
AGCCATCGGAATCAAATATGCGCTGGGCAC  
>MED12\_LsgRNA258  
AGCCATCGGAATCAAATATGCGCTGGGCAC  
>MED12\_LsgRNA259  
CGTGATGACATCTCGGGTCTGCTTGGGCAG  
>MED12\_LsgRNA260  
CGTGATGACATCTCGGGTCTGCTTGGGCAG  
>MED12\_LsgRNA261  
ACCCATGACGCCAGTCATGGTTGTGGGCAG  
>MED12\_LsgRNA262  
ACCCATGACGCCAGTCATGGTTGTGGGCAG  
>MED12\_LsgRNA263  
TACCATGACTCCAATGAGTGCCCAGGGCGT  
>MED12\_LsgRNA264  
TACCATGACTCCAATGAGTGCCCAGGGCGT  
>MED12\_LsgRNA265  
TCAGATGACTCCCAGCTCTTCCTACGGTTT  
>MED12\_LsgRNA266  
TCAGATGACTCCCAGCTCTTCCTACGGTTT  
>MED12\_LsgRNA267  
GGACATGCTGAGCGTGCTCATCAATGGGAC  
>MED12\_LsgRNA268  
GGACATGCTGAGCGTGCTCATCAATGGGAC  
>MED12\_LsgRNA269  
GGACATGGACTGACCTCCACTCAAAGGTAC  
>MED12\_LsgRNA270  
GGACATGGACTGACCTCCACTCAAAGGTAC  
>MED12\_LsgRNA271  
GAAGATGGCTGAATACTACCGGCCAGGGCC  
>MED12\_LsgRNA272  
GAAGATGGCTGAATACTACCGGCCAGGGCC  
>MED12\_LsgRNA273  
ACTTATGGGAGCAGTTACAGAAGATGGCTG  
>MED12\_LsgRNA274  
ACTTATGGGAGCAGTTACAGAAGATGGCTG  
>MED12\_LsgRNA275  
CATCATGGGGCAAGGGCCCTATCGTGGAAC  
>MED12\_LsgRNA276  
CATCATGGGGCAAGGGCCCTATCGTGGAAC

>MED12\_LsgRNA277  
AGTCATGGTTGTGGGCAGCACTCCAGGGTA  
>MED12\_LsgRNA278  
AGTCATGGTTGTGGGCAGCACTCCAGGGTA  
>MED12\_LsgRNA279  
GCGGATTCCTACTGTAGGCTTGTCTGGGGA  
>MED12\_LsgRNA280  
GCGGATTCCTACTGTAGGCTTGTCTGGGGA  
>MED12\_LsgRNA281  
CAGGATTGAACTTACTGAGAAATCAGGCTT  
>MED12\_LsgRNA282  
CAGGATTGAACTTACTGAGAAATCAGGCTT  
>MED12\_LsgRNA283  
CCGGATTGCCACCTCTACATCATGGGGCAA  
>MED12\_LsgRNA284  
CCGGATTGCCACCTCTACATCATGGGGCAA  
>MED12\_LsgRNA285  
AAGAATTGGAGAAGGGTCAGCACCTGGGTT  
>MED12\_LsgRNA286  
AAGAATTGGAGAAGGGTCAGCACCTGGGTT  
>MED12\_LsgRNA287  
CCACCAAACAGAAGATCTCGCCCTGGGATC  
>MED12\_LsgRNA288  
TCCTCAAAGAGAACACTGGAACTAGGGTCA  
>MED12\_LsgRNA289  
TCCTCAAAGAGAACACTGGAACTAGGGTCA  
>MED12\_LsgRNA290  
TTAGCAAAGATATCTTCAGCAGTGGGGAAG  
>MED12\_LsgRNA291  
CAGACAAAGCTGTAGCGGTTAGCAGGGTTC  
>MED12\_LsgRNA292  
CAGACAAAGCTGTAGCGGTTAGCAGGGTTC  
>MED12\_LsgRNA293  
TCCTCAACCAGGACCAGATGGCACAGGTCT  
>MED12\_LsgRNA294  
TCCTCAACCAGGACCAGATGGCACAGGTCT  
>MED12\_LsgRNA295  
GCTTCAACCCCTCAAAAAGATCCCAGGGCG  
>MED12\_LsgRNA296  
TCTCCAAGAGGGAGTTCATCTCCTGGGGAG  
>MED12\_LsgRNA297  
TCTCCAAGAGGGAGTTCATCTCCTGGGGAG  
>MED12\_LsgRNA298  
TCTACAAGAGTAGGATTGGTAGAAGGGTGG

>MED12\_LsgRNA299  
TCTACAAGAGTAGGATTGGTAGAAGGGTGG  
>MED12\_LsgRNA300  
AAAACAAGCGTGCATACATGAACCTGGCGA  
>MED12\_LsgRNA301  
AAAACAAGCGTGCATACATGAACCTGGCGA  
>MED12\_LsgRNA302  
TGCCCACAACCATGACTGGCGTCATGGGTT  
>MED12\_LsgRNA303  
TGCCCACAACCATGACTGGCGTCATGGGTT  
>MED12\_LsgRNA304  
GGTACACAGAGGTCTTATAAGAGGAGGGTT  
>MED12\_LsgRNA305  
GGTACACAGAGGTCTTATAAGAGGAGGGTT  
>MED12\_LsgRNA306  
AGGGCACATAAGCAGGTCACTAAAGGGAGT  
>MED12\_LsgRNA307  
AGGGCACATAAGCAGGTCACTAAAGGGAGT  
>MED12\_LsgRNA308  
TTAACACATGTCCCTGGACTGAGGTGGGCA  
>MED12\_LsgRNA309  
ATGACACCACAGCATCATCATCTGAGGAGA  
>MED12\_LsgRNA310  
ATGACACCACAGCATCATCATCTGAGGAGA  
>MED12\_LsgRNA311  
TGTGCACCAGCAGGCCCCACCTATGGACA  
>MED12\_LsgRNA312  
TGTGCACCAGCAGGCCCCACCTATGGACA  
>MED12\_LsgRNA313  
CCCCCACCCAAGGAGAAGATTGAAGGGACC  
>MED12\_LsgRNA314  
CCCCCACCCAAGGAGAAGATTGAAGGGACC  
>MED12\_LsgRNA315  
GCAGCACCAGCAGACCACGGAGTGGGCCA  
>MED12\_LsgRNA316  
GCAGCACCAGCAGACCACGGAGTGGGCCA  
>MED12\_LsgRNA317  
CCGCCACCTGCAACAGCGGCCAGTGGCTA  
>MED12\_LsgRNA318  
CCGCCACCTGCAACAGCGGCCAGTGGCTA  
>MED12\_LsgRNA319  
GCAGCACTCCAGGGTAAGTTGGTCGGGTGG  
>MED12\_LsgRNA320  
GCAGCACTCCAGGGTAAGTTGGTCGGGTGG

>MED12\_LsgRNA321  
TAGCCACTGGGCCGCTGTTGCAGGTGGCGG  
>MED12\_LsgRNA322  
TAGCCACTGGGCCGCTGTTGCAGGTGGCGG  
>MED12\_LsgRNA323  
CCCCACTTCCTGCAGGCCCTGGCCGGTAG  
>MED12\_LsgRNA324  
CCCCACTTCCTGCAGGCCCTGGCCGGTAG  
>MED12\_LsgRNA325  
CACCCAGAACCAGCCACTACCTGCAGGTGA  
>MED12\_LsgRNA326  
GGTTCAGAACCTTCAAGATATCCTTGGTGA  
>MED12\_LsgRNA327  
GGTTCAGAACCTTCAAGATATCCTTGGTGA  
>MED12\_LsgRNA328  
CTGGCAGAGTTGTCTCACCTTGGCAGGATT  
>MED12\_LsgRNA329  
CTGGCAGAGTTGTCTCACCTTGGCAGGATT  
>MED12\_LsgRNA330  
GGAGCAGATCACGAGCTTTGCCCTTGGCAT  
>MED12\_LsgRNA331  
GGAGCAGATCACGAGCTTTGCCCTTGGCAT  
>MED12\_LsgRNA332  
GGACCAGATGGCACAGGTCTTTGAGGGGTA  
>MED12\_LsgRNA333  
GGACCAGATGGCACAGGTCTTTGAGGGGTA  
>MED12\_LsgRNA334  
ATTGCAGCAACACACAGGCCCTGCAGGTAC  
>MED12\_LsgRNA335  
ATTGCAGCAACACACAGGCCCTGCAGGTAC  
>MED12\_LsgRNA336  
GCAGCAGCAACCTGCGGTGCCCCAAGGACA  
>MED12\_LsgRNA337  
GCAGCAGCAACCTGCGGTGCCCCAAGGACA  
>MED12\_LsgRNA338  
CCGTCAGCACTCTCTTGGGGCTGGTTT  
>MED12\_LsgRNA339  
CCGTCAGCACTCTCTTGGGGCTGGTTT  
>MED12\_LsgRNA340  
CAGCCAGCAGGTGGCGGTTCGAGGAGGAGC  
>MED12\_LsgRNA341  
CAGCCAGCAGGTGGCGGTTCGAGGAGGAGC  
>MED12\_LsgRNA342  
AGGACAGCCACGATGCACAGGCACAGGCTA



>MED12\_LsgRNA343  
AGGACAGCCACGATGCACAGGCACAGGCTA  
>MED12\_LsgRNA344  
GCCACAGCCCAGTACCAACATATTTGGACG  
>MED12\_LsgRNA345  
GCCACAGCCCAGTACCAACATATTTGGACG  
>MED12\_LsgRNA346  
CCAGCAGCCTTTAACACATGTCCCTGGACT  
>MED12\_LsgRNA347  
CCAGCAGCCTTTAACACATGTCCCTGGACT  
>MED12\_LsgRNA348  
TGCCCAGCGCATATTTGATTCCGATGGCTC  
>MED12\_LsgRNA349  
TGCCCAGCGCATATTTGATTCCGATGGCTC  
>MED12\_LsgRNA350  
CAACCAGCGGTTGGTCGTACTGTTTGGGGT  
>MED12\_LsgRNA351  
CAACCAGCGGTTGGTCGTACTGTTTGGGGT  
>MED12\_LsgRNA352  
CCAGCAGCTACCTGGGGCTGGGACTGGGGC  
>MED12\_LsgRNA353  
CCAGCAGCTACCTGGGGCTGGGACTGGGGC  
>MED12\_LsgRNA354  
TTGTCAGCTTCCTCAGGAATGGGTAGGAGA  
>MED12\_LsgRNA355  
TTGTCAGCTTCCTCAGGAATGGGTAGGAGA  
>MED12\_LsgRNA356  
CACACAGGACTATGGAATGGGCCCGGGTTCG  
>MED12\_LsgRNA357  
CACACAGGACTATGGAATGGGCCCGGGTTCG  
>MED12\_LsgRNA358  
ACTGCAGGAGGACATCCTGGAAAATGGGAG  
>MED12\_LsgRNA359  
ACTGCAGGAGGACATCCTGGAAAATGGGAG  
>MED12\_LsgRNA360  
GGTCCAGGCACTACTCACATTGTTAGGGGT  
>MED12\_LsgRNA361  
GGTCCAGGCACTACTCACATTGTTAGGGGT  
>MED12\_LsgRNA362  
CCAGCAGGCCCCACCTATGGACATGGACT  
>MED12\_LsgRNA363  
CCAGCAGGCCCCACCTATGGACATGGACT  
>MED12\_LsgRNA364  
GGAGCAGGCGGCTCCTCATCTTCTGGGGGC

>MED12\_LsgRNA365  
GGAGCAGGCGGCTCCTCATCTTCTGGGGGC  
>MED12\_LsgRNA366  
GAACCAGGGTTTGGGTGGTGCAGGAGGTCC  
>MED12\_LsgRNA367  
GAACCAGGGTTTGGGTGGTGCAGGAGGTCC  
>MED12\_LsgRNA368  
GCTCCAGGTAATAGGCGCGGGGCCGGGGCC  
>MED12\_LsgRNA369  
GCTCCAGGTAATAGGCGCGGGGCCGGGGCC  
>MED12\_LsgRNA370  
TGCTCAGGTAGGATGGCTGTTGAACGGACG  
>MED12\_LsgRNA371  
TGCTCAGGTAGGATGGCTGTTGAACGGACG  
>MED12\_LsgRNA372  
TAAGCAGGTCACTAAAGGGAGTCGAGGGTG  
>MED12\_LsgRNA373  
TAAGCAGGTCACTAAAGGGAGTCGAGGGTG  
>MED12\_LsgRNA374  
CACTCAGTACACCCCATACCTATCGGGATC  
>MED12\_LsgRNA375  
CACTCAGTACACCCCATACCTATCGGGATC  
>MED12\_LsgRNA376  
AGGTCAGTCCATGTCCATAGGTGGGGCCT  
>MED12\_LsgRNA377  
AGGTCAGTCCATGTCCATAGGTGGGGCCT  
>MED12\_LsgRNA378  
GGGCCAGTCTCCGTGTACAGAAGTAGGCAA  
>MED12\_LsgRNA379  
GGCCCAGTGGCTATGTGCACCAGCAGGCCC  
>MED12\_LsgRNA380  
GGCCCAGTGGCTATGTGCACCAGCAGGCCC  
>MED12\_LsgRNA381  
GTTCCAGTGTTCTCTTTGAGGACATGGAGA  
>MED12\_LsgRNA382  
GTTCCAGTGTTCTCTTTGAGGACATGGAGA  
>MED12\_LsgRNA383  
CCACCAGTTTCTGCTGTCCCTTTGCGGTTC  
>MED12\_LsgRNA384  
CCACCAGTTTCTGCTGTCCCTTTGCGGTTC  
>MED12\_LsgRNA385  
ACACCATAAGGGCCGCTCCGACCCGGGCCC  
>MED12\_LsgRNA386  
ACACCATAAGGGCCGCTCCGACCCGGGCCC

>MED12\_LsgRNA387  
GGATCATCAAAGGGAGAGGGAGGCCGGGGA  
>MED12\_LsgRNA388  
GGATCATCAAAGGGAGAGGGAGGCCGGGGA  
>MED12\_LsgRNA389  
CCCGCATCACAGGCACTGTGTATTTGGCTA  
>MED12\_LsgRNA390  
CCCGCATCACAGGCACTGTGTATTTGGCTA  
>MED12\_LsgRNA391  
ACAGCATCATCATCTGAGGAGATCTGGAGA  
>MED12\_LsgRNA392  
ACAGCATCATCATCTGAGGAGATCTGGAGA  
>MED12\_LsgRNA393  
TGCTCATCCCCAGAGACAGCAGGCTGGTTA  
>MED12\_LsgRNA394  
TGCTCATCCCCAGAGACAGCAGGCTGGTTA  
>MED12\_LsgRNA395  
GCCTCATCGACTTTGCCATTCAGGTGGGGA  
>MED12\_LsgRNA396  
GCCTCATCGACTTTGCCATTCAGGTGGGGA  
>MED12\_LsgRNA397  
GAGCCATCGGAATCAAATATGCGCTGGGCA  
>MED12\_LsgRNA398  
GAGCCATCGGAATCAAATATGCGCTGGGCA  
>MED12\_LsgRNA399  
GAAACATGAACATGGCCAGCTTCTCGGTGT  
>MED12\_LsgRNA400  
GAAACATGAACATGGCCAGCTTCTCGGTGT  
>MED12\_LsgRNA401  
AACCCATGACGCCAGTCATGGTTGTGGGCA  
>MED12\_LsgRNA402  
AACCCATGACGCCAGTCATGGTTGTGGGCA  
>MED12\_LsgRNA403  
GTACCATGACTCCAATGAGTGCCCAGGGCG  
>MED12\_LsgRNA404  
GTACCATGACTCCAATGAGTGCCCAGGGCG  
>MED12\_LsgRNA405  
TGCACATGCTGCACCAGAGGCAAGTGGTAT  
>MED12\_LsgRNA406  
TGCACATGCTGCACCAGAGGCAAGTGGTAT  
>MED12\_LsgRNA407  
GAAGCATGGGATGAACCGGTCCGATGGCTC  
>MED12\_LsgRNA408  
TTGGCATGTCATAACCACTTGCCCTCTGGTGC

>MED12\_LsgRNA409  
TTGGCATGTCATACCACTTGCCCTCTGGTGC  
>MED12\_LsgRNA410  
TCTCCATGTCCTCAAAGAGAACTGGAAC  
>MED12\_LsgRNA411  
TCTCCATGTCCTCAAAGAGAACTGGAAC  
>MED12\_LsgRNA412  
AGGGCATTGCAGACAAAGCTGTAGCGGTTA  
>MED12\_LsgRNA413  
AGGGCATTGCAGACAAAGCTGTAGCGGTTA  
>MED12\_LsgRNA414  
TCCACCAAACAGAAGATCTCGCCCTGGGAT  
>MED12\_LsgRNA415  
ACGACCAACCGCTGGTTGCACTCATGGCTG  
>MED12\_LsgRNA416  
ACGACCAACCGCTGGTTGCACTCATGGCTG  
>MED12\_LsgRNA417  
TTCTCCAAGAGGGAGTTCATCTCCTGGGGA  
>MED12\_LsgRNA418  
TTCTCCAAGAGGGAGTTCATCTCCTGGGGA  
>MED12\_LsgRNA419  
TGAACCAAGTGTTAATGGCACTCTGGGATC  
>MED12\_LsgRNA420  
TGAACCAAGTGTTAATGGCACTCTGGGATC  
>MED12\_LsgRNA421  
GGAACCACAGCCCCACTTCCTGCAGGCCC  
>MED12\_LsgRNA422  
GGAACCACAGCCCCACTTCCTGCAGGCCC  
>MED12\_LsgRNA423  
GCCCCACCCAAGGAGAAGATTGAAGGGAC  
>MED12\_LsgRNA424  
GCCCCACCCAAGGAGAAGATTGAAGGGAC  
>MED12\_LsgRNA425  
ATTTCCACCCAGTTCAGCGCCAGGGGCTT  
>MED12\_LsgRNA426  
ATTTCCACCCAGTTCAGCGCCAGGGGCTT  
>MED12\_LsgRNA427  
ACTGCCACCTCCTCCCTCCTCCTGGAAG  
>MED12\_LsgRNA428  
ACTGCCACCTCCTCCCTCCTCCTGGAAG  
>MED12\_LsgRNA429  
AGCACCCTCTCTTGGGGCTGGTTTGAAC  
>MED12\_LsgRNA430  
AGCACCCTCTCTTGGGGCTGGTTTGAAC

>MED12\_LsgRNA431  
TGAACCAGAAGGATAACTTCTGGCTGGTGA  
>MED12\_LsgRNA432  
TGAACCAGAAGGATAACTTCTGGCTGGTGA  
>MED12\_LsgRNA433  
AGGACCAGATGGCACAGGTCTTTGAGGGGT  
>MED12\_LsgRNA434  
AGGACCAGATGGCACAGGTCTTTGAGGGGT  
>MED12\_LsgRNA435  
AACACCAGCAGCAACAGCAGCAACAGGCGG  
>MED12\_LsgRNA436  
AACACCAGCAGCAACAGCAGCAACAGGCGG  
>MED12\_LsgRNA437  
TGAGCCAGCAGCCCTTCTTATCGCTGGTGC  
>MED12\_LsgRNA438  
TGAGCCAGCAGCCCTTCTTATCGCTGGTGC  
>MED12\_LsgRNA439  
GTCACCAGCCAGAAGTTATCCTTCTGGTTC  
>MED12\_LsgRNA440  
GTCACCAGCCAGAAGTTATCCTTCTGGTTC  
>MED12\_LsgRNA441  
GCAGCCAGCCAGCTACCAAGACAGAGGTGA  
>MED12\_LsgRNA442  
GCAGCCAGCCAGCTACCAAGACAGAGGTGA  
>MED12\_LsgRNA443  
AGCACCAGCGATAAGAAGGGCTGCTGGCTC  
>MED12\_LsgRNA444  
AGCACCAGCGATAAGAAGGGCTGCTGGCTC  
>MED12\_LsgRNA445  
CTCCCCAGGAGATGAACTCCCTCTTGGAGA  
>MED12\_LsgRNA446  
CTCCCCAGGAGATGAACTCCCTCTTGGAGA  
>MED12\_LsgRNA447  
GTCTCCAGGATTCAGAGGCACAATAGGAGC  
>MED12\_LsgRNA448  
GTCTCCAGGATTCAGAGGCACAATAGGAGC  
>MED12\_LsgRNA449  
CCGGCCAGGGCCTGCAGGAAGTGGGGGCTG  
>MED12\_LsgRNA450  
CCGGCCAGGGCCTGCAGGAAGTGGGGGCTG  
>MED12\_LsgRNA451  
GATCCCAGGGCGAGATCTTCTGTTTGGTGG  
>MED12\_LsgRNA452  
GATCCCAGGGCGAGATCTTCTGTTTGGTGG

>MED12\_LsgRNA453  
CACTCCAGGGTAAGTTGGTCCGGTGGGCAG  
>MED12\_LsgRNA454  
CACTCCAGGGTAAGTTGGTCCGGTGGGCAG  
>MED12\_LsgRNA455  
GGCTCCAGGTAATAGGCGCGGGGCCGGGGC  
>MED12\_LsgRNA456  
GGCTCCAGGTAATAGGCGCGGGGCCGGGGC  
>MED12\_LsgRNA457  
AGCGCCAGTCAGACAGTCTGGAAAAGGTTC  
>MED12\_LsgRNA458  
AGCGCCAGTCAGACAGTCTGGAAAAGGTTC  
>MED12\_LsgRNA459  
CACACCATAAGGGCCGCTCCGACCCGGGCC  
>MED12\_LsgRNA460  
CACACCATAAGGGCCGCTCCGACCCGGGCC  
>MED12\_LsgRNA461  
GTAGCCATTTAAAGAACAAATTTGGGGAGC  
>MED12\_LsgRNA462  
GTAGCCATTTAAAGAACAAATTTGGGGAGC  
>MED12\_LsgRNA463  
GCTGCCACCCGACCAACTTACCCTGGAGT  
>MED12\_LsgRNA464  
GCTGCCACCCGACCAACTTACCCTGGAGT  
>MED12\_LsgRNA465  
CGATCCCAGAGTGCCATTAACACTTGGTTC  
>MED12\_LsgRNA466  
CGATCCCAGAGTGCCATTAACACTTGGTTC  
>MED12\_LsgRNA467  
AGGCCCCAGCCGCGCCGCTTCAGGGGCCG  
>MED12\_LsgRNA468  
AGGCCCCAGCCGCGCCGCTTCAGGGGCCG  
>MED12\_LsgRNA469  
AAGACCCAGTGTTGAGTAGTGCCAGGCGC  
>MED12\_LsgRNA470  
AAGACCCAGTGTTGAGTAGTGCCAGGCGC  
>MED12\_LsgRNA471  
AGCCCCCAAACACTGACAAACCGGGGGCTG  
>MED12\_LsgRNA472  
AGCCCCCAAACACTGACAAACCGGGGGCTG  
>MED12\_LsgRNA473  
AGCTCCCCAAATTTGTTCTTTAAATGGCTA  
>MED12\_LsgRNA474  
AGCTCCCCAAATTTGTTCTTTAAATGGCTA

>MED12\_LsgRNA475  
ATCTCCCAACTTCCCCACCTGAATGGCAA  
>MED12\_LsgRNA476  
ATCTCCCAACTTCCCCACCTGAATGGCAA  
>MED12\_LsgRNA477  
CCAGCCCCAAGAGAGTGGTGCTGACGGCTT  
>MED12\_LsgRNA478  
CCAGCCCCAAGAGAGTGGTGCTGACGGCTT  
>MED12\_LsgRNA479  
GGTGCCCCACACAGACGTGCATAAGGGCAT  
>MED12\_LsgRNA480  
GGTGCCCCACACAGACGTGCATAAGGGCAT  
>MED12\_LsgRNA481  
GAGGCCCCAGCCGCGGCCGCTTCAGGGGCC  
>MED12\_LsgRNA482  
GAGGCCCCAGCCGCGGCCGCTTCAGGGGCC  
>MED12\_LsgRNA483  
TACACCCCATACCTATCGGGATCATGGTGC  
>MED12\_LsgRNA484  
TACACCCCATACCTATCGGGATCATGGTGC  
>MED12\_LsgRNA485  
GAGCCCCCAAACACTGACAAACCGGGGGCT  
>MED12\_LsgRNA486  
GAGCCCCCAAACACTGACAAACCGGGGGCT  
>MED12\_LsgRNA487  
ACAGCCCCCACTTCCTGCAGGCCCTGGCCG  
>MED12\_LsgRNA488  
ACAGCCCCCACTTCCTGCAGGCCCTGGCCG  
>MED12\_LsgRNA489  
AGAGCCCCCAAACACTGACAAACCGGGGGC  
>MED12\_LsgRNA490  
AGAGCCCCCAAACACTGACAAACCGGGGGC  
>MED12\_LsgRNA491  
TTCTCCCCTACTATGCCCTGTGAGGGGAAG  
>MED12\_LsgRNA492  
CCTTCCCCTCACAGGGCATAGTAGGGGAGA  
>MED12\_LsgRNA493  
CCTTCCCCTCACAGGGCATAGTAGGGGAGA  
>MED12\_LsgRNA494  
CCGGCCCCTGAAGCGGCCGCGGCTGGGGCC  
>MED12\_LsgRNA495  
CCGGCCCCTGAAGCGGCCGCGGCTGGGGCC  
>MED12\_LsgRNA496  
TCCACCCGCTCACTCTCACTTCGAGGGTCC

>MED12\_LsgRNA497  
TCCACCCGCTCACTCTCACTTCGAGGGTCC  
>MED12\_LsgRNA498  
CCCACCCGTGAACCACAGGGGATGCGGAAC  
>MED12\_LsgRNA499  
CCCACCCGTGAACCACAGGGGATGCGGAAC  
>MED12\_LsgRNA500  
TTTACCCTCAGGACCCCAAACAGAAGGAGG  
>MED12\_LsgRNA501  
TTTACCCTCAGGACCCCAAACAGAAGGAGG  
>MED12\_LsgRNA502  
CGGACCCTCGAAGTGAGAGTGAGCGGGTGG  
>MED12\_LsgRNA503  
CGGACCCTCGAAGTGAGAGTGAGCGGGTGG  
>MED12\_LsgRNA504  
CGGCCCTGAAGCGGCCGCGGCTGGGGCCT  
>MED12\_LsgRNA505  
CGGCCCTGAAGCGGCCGCGGCTGGGGCCT  
>MED12\_LsgRNA506  
AATACCCTTCCTGACACTGGTCGCAGGAAG  
>MED12\_LsgRNA507  
AATACCCTTCCTGACACTGGTCGCAGGAAG  
>MED12\_LsgRNA508  
GGCCCCGGCCCCGCGCCTATTACCTGGAGC  
>MED12\_LsgRNA509  
GGCCCCGGCCCCGCGCCTATTACCTGGAGC  
>MED12\_LsgRNA510  
TGGACCGGCGAGTGGCTCGAGGAGAGGAGC  
>MED12\_LsgRNA511  
TGGACCGGCGAGTGGCTCGAGGAGAGGAGC  
>MED12\_LsgRNA512  
GAGGCCGGGGACCAGGGGCTCCAAAGGCAA  
>MED12\_LsgRNA513  
GAGGCCGGGGACCAGGGGCTCCAAAGGCAA  
>MED12\_LsgRNA514  
GGGCCCGGGTCGGAGCGGCCCTTATGGTGT  
>MED12\_LsgRNA515  
GGGCCCGGGTCGGAGCGGCCCTTATGGTGT  
>MED12\_LsgRNA516  
GAAGCCGTCAGCACCACTCTCTTGGGGCTG  
>MED12\_LsgRNA517  
GAAGCCGTCAGCACCACTCTCTTGGGGCTG  
>MED12\_LsgRNA518  
GGTACCTAAGAATGTCAGGTCTCCAGGATT



>MED12\_LsgRNA519  
GGTACCTAAGAATGTCAGGTCTCCAGGATT  
>MED12\_LsgRNA520  
TGCTCCTATTGTGCCTCTGAATCCTGGAGA  
>MED12\_LsgRNA521  
TGCTCCTATTGTGCCTCTGAATCCTGGAGA  
>MED12\_LsgRNA522  
TACCCCTCAAAGACCTGTGCCATCTGGTCC  
>MED12\_LsgRNA523  
TACCCCTCAAAGACCTGTGCCATCTGGTCC  
>MED12\_LsgRNA524  
GTGGCCTCATCGACTTTGCCATTCAGGTGG  
>MED12\_LsgRNA525  
GTGGCCTCATCGACTTTGCCATTCAGGTGG  
>MED12\_LsgRNA526  
CCTCCCTCTACAGCCAGGTGCACCAGGTAC  
>MED12\_LsgRNA527  
CCTCCCTCTACAGCCAGGTGCACCAGGTAC  
>MED12\_LsgRNA528  
TGCTCCTCTCCTCGAGCCACTCGCCGGTCC  
>MED12\_LsgRNA529  
CTCACCTCTGTCTTGGTAGCTGGCTGGCTG  
>MED12\_LsgRNA530  
CTCACCTCTGTCTTGGTAGCTGGCTGGCTG  
>MED12\_LsgRNA531  
CCCACCTGAATGGCAAAGTCGATGAGGCCA  
>MED12\_LsgRNA532  
CCCACCTGAATGGCAAAGTCGATGAGGCCA  
>MED12\_LsgRNA533  
AGGGCCTGCAGGAAGTGGGGGCTGTGGTTC  
>MED12\_LsgRNA534  
AGGGCCTGCAGGAAGTGGGGGCTGTGGTTC  
>MED12\_LsgRNA535  
CTTTCCTGCCTCAGGATGAACTGACGGCCT  
>MED12\_LsgRNA536  
CTTTCCTGCCTCAGGATGAACTGACGGCCT  
>MED12\_LsgRNA537  
GCTTCCTGCGACCAGTGTGTCAGGAAGGGTAT  
>MED12\_LsgRNA538  
GCTTCCTGCGACCAGTGTGTCAGGAAGGGTAT  
>MED12\_LsgRNA539  
CTACCCTGCTAGAGCCTGAGAAAAAGGCTC  
>MED12\_LsgRNA540  
CTACCCTGCTAGAGCCTGAGAAAAAGGCTC

>MED12\_LsgRNA541  
GAATCCTGGAGACCTGACATTCTTAGGTAC  
>MED12\_LsgRNA542  
GAATCCTGGAGACCTGACATTCTTAGGTAC  
>MED12\_LsgRNA543  
TGCACCTGGCTGTAGAGGGAGGTAAGGAGT  
>MED12\_LsgRNA544  
TGCACCTGGCTGTAGAGGGAGGTAAGGAGT  
>MED12\_LsgRNA545  
TGCGCCTGGGCACTACTCAAACTGGGTCT  
>MED12\_LsgRNA546  
TGCGCCTGGGCACTACTCAAACTGGGTCT  
>MED12\_LsgRNA547  
TGTACCTGGTGCACCTGGCTGTAGAGGGAG  
>MED12\_LsgRNA548  
TGTACCTGGTGCACCTGGCTGTAGAGGGAG  
>MED12\_LsgRNA549  
TCTTCCTGTGCCTGCAGAAGGAGTTGGGGG  
>MED12\_LsgRNA550  
TCTTCCTGTGCCTGCAGAAGGAGTTGGGGG  
>MED12\_LsgRNA551  
TCCTCCTGTGCTGTCCTAGTGCCTTGTTTT  
>MED12\_LsgRNA552  
TCCTCCTGTGCTGTCCTAGTGCCTTGTTTT  
>MED12\_LsgRNA553  
GCCGCCTGTTGCTGCTGTTGCTGCTGGTGT  
>MED12\_LsgRNA554  
GCCGCCTGTTGCTGCTGTTGCTGCTGGTGT  
>MED12\_LsgRNA555  
GACTCCTTACCTCCCTCTACAGCCAGGTGC  
>MED12\_LsgRNA556  
TCCTCCTTAGGCTTCACCATTGGACGGGTA  
>MED12\_LsgRNA557  
TCCTCCTTAGGCTTCACCATTGGACGGGTA  
>MED12\_LsgRNA558  
GGTCCCTTCAATCTTCTCCTTGGGTGGGGG  
>MED12\_LsgRNA559  
GGTCCCTTCAATCTTCTCCTTGGGTGGGGG  
>MED12\_LsgRNA560  
GCTGCCTTCAGCCTCCTTGTGCTCTGGGTC  
>MED12\_LsgRNA561  
GCTGCCTTCAGCCTCCTTGTGCTCTGGGTC  
>MED12\_LsgRNA562  
ACCTCCTTCTGTTTGGGGTCCTGAGGGTAA

>MED12\_LsgRNA563  
ACCTCCTTCTGTTTGGGGTCCTGAGGGTAA  
>MED12\_LsgRNA564  
GTGGCCTTGGCGATGTTCTCCAAGAGGGAG  
>MED12\_LsgRNA565  
GTGGCCTTGGCGATGTTCTCCAAGAGGGAG  
>MED12\_LsgRNA566  
CTTGCCTTTGGAGCCCCTGGTCCCCGGCCT  
>MED12\_LsgRNA567  
TTTTCGAACGCACCTCCTTCTGTTTGGGGT  
>MED12\_LsgRNA568  
TTTTCGAACGCACCTCCTTCTGTTTGGGGT  
>MED12\_LsgRNA569  
ACATCGACTGCTGGACAATGAGGATGGGGA  
>MED12\_LsgRNA570  
ACATCGACTGCTGGACAATGAGGATGGGGA  
>MED12\_LsgRNA571  
AGATCGAGCAGCAGATCAAGGAGCGGGGAC  
>MED12\_LsgRNA572  
AGATCGAGCAGCAGATCAAGGAGCGGGGAC  
>MED12\_LsgRNA573  
GAGTCGAGGGTGTGCTGCTAGTTGGGGGCT  
>MED12\_LsgRNA574  
TGCTCGATCTCCCGCAACTTTGCACGGACC  
>MED12\_LsgRNA575  
TGCTCGATCTCCCGCAACTTTGCACGGACC  
>MED12\_LsgRNA576  
GCTTCGATTCCATCTTCAAGAAGGAGGCAT  
>MED12\_LsgRNA577  
GCTTCGATTCCATCTTCAAGAAGGAGGCAT  
>MED12\_LsgRNA578  
GAACCGCAAAGGGACAGCAGAACTGGTGG  
>MED12\_LsgRNA579  
GAACCGCAAAGGGACAGCAGAACTGGTGG  
>MED12\_LsgRNA580  
GGAACGCAAGAAGAAGTCCACCAAGGGCAA  
>MED12\_LsgRNA581  
GGAACGCAAGAAGAAGTCCACCAAGGGCAA  
>MED12\_LsgRNA582  
TCATCGCTCGGCAGTGTGCTCCTGGAAG  
>MED12\_LsgRNA583  
TCATCGCTCGGCAGTGTGCTCCTGGAAG  
>MED12\_LsgRNA584  
GTGCCGCTGATGATGATCTCCAGGAGGAGC

>MED12\_LsgRNA585  
GTGCCGCTGATGATGATCTCCAGGAGGAGC  
>MED12\_LsgRNA586  
AAGGCGCTGTCCTTGGGGCACCGCAGGTTG  
>MED12\_LsgRNA587  
AAGGCGCTGTCCTTGGGGCACCGCAGGTTG  
>MED12\_LsgRNA588  
GGGCCGCTGTTGCAGGTGGCGGGTAGGATC  
>MED12\_LsgRNA589  
GGGCCGCTGTTGCAGGTGGCGGGTAGGATC  
>MED12\_LsgRNA590  
AATGCGCTTTATGCGCTGCCGCTGGGGGTT  
>MED12\_LsgRNA591  
AATGCGCTTTATGCGCTGCCGCTGGGGGTT  
>MED12\_LsgRNA592  
GATGCGGCAGGTAAGCCGGGCCCTGGCTC  
>MED12\_LsgRNA593  
CTACCGGCCAGGGCCTGCAGGAAGTGGGGG  
>MED12\_LsgRNA594  
CTACCGGCCAGGGCCTGCAGGAAGTGGGGG  
>MED12\_LsgRNA595  
GTGGCGGGTAGGATCTACAAGAGTAGGATT  
>MED12\_LsgRNA596  
GTGGCGGGTAGGATCTACAAGAGTAGGATT  
>MED12\_LsgRNA597  
TGGTCGGGTGGGCAGCTTCTGCATTGGTAA  
>MED12\_LsgRNA598  
TGGTCGGGTGGGCAGCTTCTGCATTGGTAA  
>MED12\_LsgRNA599  
GTGGCGTACTGCACGTGTCGTGGCTGGTTCG  
>MED12\_LsgRNA600  
GTGGCGTACTGCACGTGTCGTGGCTGGTTCG  
>MED12\_LsgRNA601  
AGAACGTCAGCTTCAATCCTGCCAAGGTGA  
>MED12\_LsgRNA602  
AGAACGTCAGCTTCAATCCTGCCAAGGTGA  
>MED12\_LsgRNA603  
GTAGCGTCCAAATATGTTGGTACTGGGCTG  
>MED12\_LsgRNA604  
GTAGCGTCCAAATATGTTGGTACTGGGCTG  
>MED12\_LsgRNA605  
TGAGCGTGCTCATCAATGGGACATTGGCTG  
>MED12\_LsgRNA606  
GATCCTACCGCCACCTGCAACAGCGGCC

>MED12\_LsgRNA607  
GATCCTACCCGCCACCTGCAACAGCGGCC  
>MED12\_LsgRNA608  
GGCGCTACGGGCTGGGCAAGATGGCGGCCT  
>MED12\_LsgRNA609  
GGCGCTACGGGCTGGGCAAGATGGCGGCCT  
>MED12\_LsgRNA610  
CTTCTACGGTTTGCAGACTTCCCAGGTAA  
>MED12\_LsgRNA611  
CTTCTACGGTTTGCAGACTTCCCAGGTAA  
>MED12\_LsgRNA612  
CCATCTACTGCAACGTGGAGCCATCGGAAT  
>MED12\_LsgRNA613  
CCATCTACTGCAACGTGGAGCCATCGGAAT  
>MED12\_LsgRNA614  
ACCACTACTTTGGGTACCTTTGAGTGGAGG  
>MED12\_LsgRNA615  
ACCACTACTTTGGGTACCTTTGAGTGGAGG  
>MED12\_LsgRNA616  
GCTGCTAGTTGGGGCTGAGGAGCAGGGGT  
>MED12\_LsgRNA617  
GCTGCTAGTTGGGGCTGAGGAGCAGGGGT  
>MED12\_LsgRNA618  
GGTTCTATAACACACCTTAACTACAGGCAA  
>MED12\_LsgRNA619  
GGTTCTATAACACACCTTAACTACAGGCAA  
>MED12\_LsgRNA620  
CTCACTATCTTTGCCTGGAGCTGTTGGCGA  
>MED12\_LsgRNA621  
CTCACTATCTTTGCCTGGAGCTGTTGGCGA  
>MED12\_LsgRNA622  
TCTTCTCAAACACTCAAGCACCCAGGTCA  
>MED12\_LsgRNA623  
GCTTCTCAAATCCTCGGATCTGGTGGGCAG  
>MED12\_LsgRNA624  
TGTTCTCAAGGCTGTGTTTGTACTTGGTAC  
>MED12\_LsgRNA625  
TGTTCTCAAGGCTGTGTTTGTACTTGGTAC  
>MED12\_LsgRNA626  
GCAGCTCAATCCTTGCCAGTCTGATGGAAG  
>MED12\_LsgRNA627  
GCAGCTCAATCCTTGCCAGTCTGATGGAAG  
>MED12\_LsgRNA628  
GCCACTCACACAGGACTATGGAATGGGCC

>MED12\_LsgRNA629  
GCCACTCACACAGGACTATGGAATGGGCCC  
>MED12\_LsgRNA630  
GCAGCTCACACCTTCACCTACACGGGGCTA  
>MED12\_LsgRNA631  
GTGGCTCACACGTGATGACATCTCGGGTCT  
>MED12\_LsgRNA632  
GTGGCTCACACGTGATGACATCTCGGGTCT  
>MED12\_LsgRNA633  
GGCGCTCACCTCTGTCTTGGTAGCTGGCTG  
>MED12\_LsgRNA634  
GGCGCTCACCTCTGTCTTGGTAGCTGGCTG  
>MED12\_LsgRNA635  
TGGTCTCAGAGATTGCTGCATAGTAGGCAC  
>MED12\_LsgRNA636  
TGGTCTCAGAGATTGCTGCATAGTAGGCAC  
>MED12\_LsgRNA637  
GGGGCTCCAAAGGCAAGGTCCCCTCGGGAG  
>MED12\_LsgRNA638  
GGGGCTCCAAAGGCAAGGTCCCCTCGGGAG  
>MED12\_LsgRNA639  
ACGGCTCCATCCACGATGCGGTTCTGGGAG  
>MED12\_LsgRNA640  
ACGGCTCCATCCACGATGCGGTTCTGGGAG  
>MED12\_LsgRNA641  
TGTTCTCCCCTACTATGCCCTGTGAGGGGA  
>MED12\_LsgRNA642  
TGTTCTCCCCTACTATGCCCTGTGAGGGGA  
>MED12\_LsgRNA643  
AGATCTCCTCAGATGATGATGCTGTGGTGT  
>MED12\_LsgRNA644  
AGATCTCCTCAGATGATGATGCTGTGGTGT  
>MED12\_LsgRNA645  
GGACCTCCTGCACCACCCAAACCCTGGTTC  
>MED12\_LsgRNA646  
GGACCTCCTGCACCACCCAAACCCTGGTTC  
>MED12\_LsgRNA647  
CAGCCTCCTTGTGCTCTGGGTCATCGGCAG  
>MED12\_LsgRNA648  
CAGCCTCCTTGTGCTCTGGGTCATCGGCAG  
>MED12\_LsgRNA649  
CCTTCTCGACATCTGGCTTCTCAGGGGATG  
>MED12\_LsgRNA650  
CCTTCTCGACATCTGGCTTCTCAGGGGATG

>MED12\_LsgRNA651  
GTGGCTCGAGGAGAGGAGCAGCAGCGGTTG  
>MED12\_LsgRNA652  
GTGGCTCGAGGAGAGGAGCAGCAGCGGTTG  
>MED12\_LsgRNA653  
AGCTCTCTAGAGCGCTCTGGTGTATGGCTG  
>MED12\_LsgRNA654  
AGCTCTCTAGAGCGCTCTGGTGTATGGCTG  
>MED12\_LsgRNA655  
CTCACTCTCACTTCGAGGGTCCGCTGGAGG  
>MED12\_LsgRNA656  
CTCACTCTCACTTCGAGGGTCCGCTGGAGG  
>MED12\_LsgRNA657  
ACATCTCTGTGGAGACAGCCAGTCTGGATG  
>MED12\_LsgRNA658  
ACATCTCTGTGGAGACAGCCAGTCTGGATG  
>MED12\_LsgRNA659  
ACACCTCTTCCTTCTTACTGAAAAATGGGGA  
>MED12\_LsgRNA660  
ACACCTCTTCCTTCTTACTGAAAAATGGGGA  
>MED12\_LsgRNA661  
AAGTCTGCAAACCGTAGGAAGAGCTGGGAG  
>MED12\_LsgRNA662  
AAGTCTGCAAACCGTAGGAAGAGCTGGGAG  
>MED12\_LsgRNA663  
CGCTCTGCAGAGGAGCCATCGGACCGGTTT  
>MED12\_LsgRNA664  
CGCTCTGCAGAGGAGCCATCGGACCGGTTT  
>MED12\_LsgRNA665  
TCACCTGCAGGTAGTGGCTGGTTCTGGGTG  
>MED12\_LsgRNA666  
TCACCTGCAGGTAGTGGCTGGTTCTGGGTG  
>MED12\_LsgRNA667  
TGAGCTGCATGAGGCGCTGCGCCTGGGCAC  
>MED12\_LsgRNA668  
TGAGCTGCATGAGGCGCTGCGCCTGGGCAC  
>MED12\_LsgRNA669  
TCCTCTGCCACTCACACAGGACTATGGAAT  
>MED12\_LsgRNA670  
TCCTCTGCCACTCACACAGGACTATGGAAT  
>MED12\_LsgRNA671  
GCTGCTGCTGCTGCTCAGGTAGGATGGCTG  
>MED12\_LsgRNA672  
GCTGCTGCTGCTGCTCAGGTAGGATGGCTG

>MED12\_LsgRNA673  
GGGCCTGCTGGTGCACATAGCCACTGGGCC  
>MED12\_LsgRNA674  
GGGCCTGCTGGTGCACATAGCCACTGGGCC  
>MED12\_LsgRNA675  
AAAGCTGCTGTCTGTTGCTGCTGCTGGGTC  
>MED12\_LsgRNA676  
AAAGCTGCTGTCTGTTGCTGCTGCTGGGTC  
>MED12\_LsgRNA677  
CTGGCTGGCTGCGTTTCTTGCCCTTGGTGG  
>MED12\_LsgRNA678  
CTGGCTGGCTGCGTTTCTTGCCCTTGGTGG  
>MED12\_LsgRNA679  
TTACCTGGGAAGTCTGCAAACCGTAGGAAG  
>MED12\_LsgRNA680  
TTACCTGGGAAGTCTGCAAACCGTAGGAAG  
>MED12\_LsgRNA681  
CGGGCTGGGCAAGATGGCGGCCTTCGGGAT  
>MED12\_LsgRNA682  
CGGGCTGGGCAAGATGGCGGCCTTCGGGAT  
>MED12\_LsgRNA683  
CGCCCTGGGCACTCATTGGAGTCATGGTAC  
>MED12\_LsgRNA684  
CGCCCTGGGCACTCATTGGAGTCATGGTAC  
>MED12\_LsgRNA685  
GTGGCTGGTCGTAAAGAACCCCAAGGGTCC  
>MED12\_LsgRNA686  
GTACCTGGTGCACCTGGCTGTAGAGGGAGG  
>MED12\_LsgRNA687  
GTACCTGGTGCACCTGGCTGTAGAGGGAGG  
>MED12\_LsgRNA688  
ATCGCTGGTGCTAACATGTCTGAAAGGGCA  
>MED12\_LsgRNA689  
ATCGCTGGTGCTAACATGTCTGAAAGGGCA  
>MED12\_LsgRNA690  
GGGGCTGGTTTGGAACAGTCCGAGTGGACC  
>MED12\_LsgRNA691  
GGGGCTGGTTTGGAACAGTCCGAGTGGACC  
>MED12\_LsgRNA692  
CTGGCTGTCTCCACAGAGATGTTGCGGCCA  
>MED12\_LsgRNA693  
CTTCCTGTGCCTGCAGAAGGAGTTGGGGGA  
>MED12\_LsgRNA694  
CTTCCTGTGCCTGCAGAAGGAGTTGGGGGA



>MED12\_LsgRNA695  
CAGGCTGTGTGGCGTCGTGAAGCATGGGAT  
>MED12\_LsgRNA696  
ATGGCTGTTGAACGGACGCCTGCCTGGACG  
>MED12\_LsgRNA697  
ATGGCTGTTGAACGGACGCCTGCCTGGACG  
>MED12\_LsgRNA698  
CCTCCTTAGGCTTCACCATTGGACGGGTAC  
>MED12\_LsgRNA699  
CCTCCTTAGGCTTCACCATTGGACGGGTAC  
>MED12\_LsgRNA700  
TCCTCTTATAAGACCTCTGTGTACCGGCAG  
>MED12\_LsgRNA701  
TCCTCTTATAAGACCTCTGTGTACCGGCAG  
>MED12\_LsgRNA702  
GTCCCTTCAATCTTCTCCTTGGGTGGGGGC  
>MED12\_LsgRNA703  
GTCCCTTCAATCTTCTCCTTGGGTGGGGGC  
>MED12\_LsgRNA704  
CTGCCTTCAGCCTCCTTGTGCTCTGGGTCA  
>MED12\_LsgRNA705  
CTGCCTTCAGCCTCCTTGTGCTCTGGGTCA  
>MED12\_LsgRNA706  
AGAACTTCCAGAGGAGGAGGGAGGAGGTGG  
>MED12\_LsgRNA707  
AGAACTTCCAGAGGAGGAGGGAGGAGGTGG  
>MED12\_LsgRNA708  
ACCTCTTCCTTCTTACTGAAAATGGGGACC  
>MED12\_LsgRNA709  
ACCTCTTCCTTCTTACTGAAAATGGGGACC  
>MED12\_LsgRNA710  
CTGGCTTCGATTCCATCTTCAAGAAGGAGG  
>MED12\_LsgRNA711  
CTGGCTTCGATTCCATCTTCAAGAAGGAGG  
>MED12\_LsgRNA712  
ACTTCTTCTTGCCTTCCTCAGTACTGGGTG  
>MED12\_LsgRNA713  
ACTTCTTCTTGCCTTCCTCAGTACTGGGTG  
>MED12\_LsgRNA714  
GGCCCTTGCCCCATGATGTAGAGGTGGCAA  
>MED12\_LsgRNA715  
GGCCCTTGCCCCATGATGTAGAGGTGGCAA  
>MED12\_LsgRNA716  
TGGCCTTGGCGATGTTCTCCAAGAGGGAGT

>MED12\_LsgRNA717  
TGGCCTTGGCGATGTTCTCCAAGAGGGAGT  
>MED12\_LsgRNA718  
GAATCTTTGGATTGGGACCTAGCAAGGATG  
>MED12\_LsgRNA719  
GAATCTTTGGATTGGGACCTAGCAAGGATG  
>MED12\_LsgRNA720  
ACTACTTTGGGTACCTTTGAGTGGAGGTCA  
>MED12\_LsgRNA721  
ACTACTTTGGGTACCTTTGAGTGGAGGTCA  
>MED12\_LsgRNA722  
GTTGGAAAACCTCGATTGTGGCCTTGGCGA  
>MED12\_LsgRNA723  
GTTGGAAAACCTCGATTGTGGCCTTGGCGA  
>MED12\_LsgRNA724  
TCCAGAACTGCAGGAGGACATCCTGGAAA  
>MED12\_LsgRNA725  
TCCAGAACTGCAGGAGGACATCCTGGAAA  
>MED12\_LsgRNA726  
ACATGAACCTGGCGAAGAAGTTGCAGGTAA  
>MED12\_LsgRNA727  
ACATGAACCTGGCGAAGAAGTTGCAGGTAA  
>MED12\_LsgRNA728  
TTTCGAACGCACCTCCTTCTGTTTGGGGTC  
>MED12\_LsgRNA729  
TTTCGAACGCACCTCCTTCTGTTTGGGGTC  
>MED12\_LsgRNA730  
AGAAGAACTTCCAGAGGAGGAGGGAGGAGG  
>MED12\_LsgRNA731  
AACAGAAGAACTTCCAGAGGAGGAGGGAGG  
>MED12\_LsgRNA732  
AACAGAAGAACTTCCAGAGGAGGAGGGAGG  
>MED12\_LsgRNA733  
TGGAGAAGAGACAGGCGGAGATTGAGGCTG  
>MED12\_LsgRNA734  
TGGAGAAGAGACAGGCGGAGATTGAGGCTG  
>MED12\_LsgRNA735  
AGGAGAAGATTGAAGGGACCCTTGGGGTTC  
>MED12\_LsgRNA736  
AGGAGAAGATTGAAGGGACCCTTGGGGTTC  
>MED12\_LsgRNA737  
CTGAGAAGCCAGATGTCGAGAAGGAGGTGA  
>MED12\_LsgRNA738  
CTGAGAAGCCAGATGTCGAGAAGGAGGTGA

>MED12\_LsgRNA739  
GCAGGAAGCCCCAAGTGAACCAGAAGGATA  
>MED12\_LsgRNA740  
TGCTGAAGCCCCTGGCGCTGGAAGTGGGTG  
>MED12\_LsgRNA741  
TGCTGAAGCCCCTGGCGCTGGAAGTGGGTG  
>MED12\_LsgRNA742  
ATAAGAAGGGCTGCTGGCTCAATAGGGACA  
>MED12\_LsgRNA743  
ATAAGAAGGGCTGCTGGCTCAATAGGGACA  
>MED12\_LsgRNA744  
GGTAGAAGGGTGGGTGCTCTGGTAAGGCTG  
>MED12\_LsgRNA745  
GGTAGAAGGGTGGGTGCTCTGGTAAGGCTG  
>MED12\_LsgRNA746  
CATGGAATATTCACCTCAGCATCAGTGGCCT  
>MED12\_LsgRNA747  
CATGGAATATTCACCTCAGCATCAGTGGCCT  
>MED12\_LsgRNA748  
TGCTGAATGAACTGAGTGTAGTTGAGGCTG  
>MED12\_LsgRNA749  
TGCTGAATGAACTGAGTGTAGTTGAGGCTG  
>MED12\_LsgRNA750  
CGGGGACAGGCAGTTGAAGTTCGCTGGTCT  
>MED12\_LsgRNA751  
CGGGGACAGGCAGTTGAAGTTCGCTGGTCT  
>MED12\_LsgRNA752  
TGCAGACATGTCTAGCATCTCGCAAGGTAG  
>MED12\_LsgRNA753  
TGCAGACATGTCTAGCATCTCGCAAGGTAG  
>MED12\_LsgRNA754  
CAGGGACATGTGTTAAAGGCTGCTGGGGAA  
>MED12\_LsgRNA755  
CAGGGACATGTGTTAAAGGCTGCTGGGGAA  
>MED12\_LsgRNA756  
GCAAGACCAAGCCTGTGCTCAGGTCGGATA  
>MED12\_LsgRNA757  
GCAAGACCAAGCCTGTGCTCAGGTCGGATA  
>MED12\_LsgRNA758  
CGGGGACCAGGGGCTCCAAAGGCAAGGTCC  
>MED12\_LsgRNA759  
CGGGGACCAGGGGCTCCAAAGGCAAGGTCC  
>MED12\_LsgRNA760  
AGTGGACCATGCGCCAGTCTTCCTTGGAGC

>MED12\_LsgRNA761  
AGTGGACCATGCGCCAGTCTTCCTTGGAGC  
>MED12\_LsgRNA762  
AGGGGACCTTGCCTTTGGAGCCCCTGGTCC  
>MED12\_LsgRNA763  
AGGGGACCTTGCCTTTGGAGCCCCTGGTCC  
>MED12\_LsgRNA764  
AACGGACGCCTGCCTGGACGCCCTGGGCAC  
>MED12\_LsgRNA765  
AACGGACGCCTGCCTGGACGCCCTGGGCAC  
>MED12\_LsgRNA766  
ACAGGACGGTATGGGTCCACACGAGGGCCA  
>MED12\_LsgRNA767  
ACAGGACGGTATGGGTCCACACGAGGGCCA  
>MED12\_LsgRNA768  
CATCGACTGCTGGACAATGAGGATGGGGAA  
>MED12\_LsgRNA769  
CATCGACTGCTGGACAATGAGGATGGGGAA  
>MED12\_LsgRNA770  
ATCAGACTGGCAAGGATTGAGCTGCGGTGT  
>MED12\_LsgRNA771  
ATCAGACTGGCAAGGATTGAGCTGCGGTGT  
>MED12\_LsgRNA772  
CAAGGAGAAGATTGAAGGGACCCTTGGGGT  
>MED12\_LsgRNA773  
CAAGGAGAAGATTGAAGGGACCCTTGGGGT  
>MED12\_LsgRNA774  
AGATGAGAAGGGTTCCATCGCCTCTGGCTC  
>MED12\_LsgRNA775  
AGAAGAGACATGTTGACCCTTTCATGGGTG  
>MED12\_LsgRNA776  
AGAAGAGACATGTTGACCCTTTCATGGGTG  
>MED12\_LsgRNA777  
AAGGGAGAGGGAGGCCGGGGACCAGGGGCT  
>MED12\_LsgRNA778  
AAGGGAGAGGGAGGCCGGGGACCAGGGGCT  
>MED12\_LsgRNA779  
GATCGAGCAGCAGATCAAGGAGCGGGGACA  
>MED12\_LsgRNA780  
GATCGAGCAGCAGATCAAGGAGCGGGGACA  
>MED12\_LsgRNA781  
CCTCGAGCCACTCGCCGGTCCACTCGGACT  
>MED12\_LsgRNA782  
CCTCGAGCCACTCGCCGGTCCACTCGGACT

>MED12\_LsgRNA783  
CCAGGAGGAGCATGGCCCACTCCGTGGTCT  
>MED12\_LsgRNA784  
CCAGGAGGAGCATGGCCCACTCCGTGGTCT  
>MED12\_LsgRNA785  
TTCAGAGGCACAATAGGAGCAAGCTGGTCT  
>MED12\_LsgRNA786  
TTCAGAGGCACAATAGGAGCAAGCTGGTCT  
>MED12\_LsgRNA787  
TCCGGAGGCACTGTCACACCATAAGGGCCG  
>MED12\_LsgRNA788  
TCCGGAGGCACTGTCACACCATAAGGGCCG  
>MED12\_LsgRNA789  
GGAGGAGGTGGCAGTGGTGGTCGGAGGCAG  
>MED12\_LsgRNA790  
GGAGGAGGTGGCAGTGGTGGTCGGAGGCAG  
>MED12\_LsgRNA791  
ACAAGAGTAGGATTGGTAGAAGGGTGGGTG  
>MED12\_LsgRNA792  
ACAAGAGTAGGATTGGTAGAAGGGTGGGTG  
>MED12\_LsgRNA793  
ATGAGAGTGCAAGTATACATGTTGTGGGAG  
>MED12\_LsgRNA794  
ATGAGAGTGCAAGTATACATGTTGTGGGAG  
>MED12\_LsgRNA795  
TGTGGATAGCAAATGAGCTGCATGAGGCCG  
>MED12\_LsgRNA796  
TGTGGATAGCAAATGAGCTGCATGAGGCCG  
>MED12\_LsgRNA797  
CAAAGATATCTTCAGCAGTGGGGAAGGCTT  
>MED12\_LsgRNA798  
CAAAGATATCTTCAGCAGTGGGGAAGGCTT  
>MED12\_LsgRNA799  
CTCAGATCATCACCAAGTACTTATGGGAGC  
>MED12\_LsgRNA800  
CTCAGATCATCACCAAGTACTTATGGGAGC  
>MED12\_LsgRNA801  
TCGTGATCTGCTCCAGAACATTCCGGGAGA  
>MED12\_LsgRNA802  
TCGTGATCTGCTCCAGAACATTCCGGGAGA  
>MED12\_LsgRNA803  
ACGTGATGACATCTCGGGTCTGCTTGGGCA  
>MED12\_LsgRNA804  
ACGTGATGACATCTCGGGTCTGCTTGGGCA

>MED12\_LsgRNA805  
AGGGGATGCGGAACTGAAAGGTTTCAGGCTT  
>MED12\_LsgRNA806  
AGGGGATGCGGAACTGAAAGGTTTCAGGCTT  
>MED12\_LsgRNA807  
GGCAGATGCTGCGCAGCACGTACTTGGCAT  
>MED12\_LsgRNA808  
GGCAGATGCTGCGCAGCACGTACTTGGCAT  
>MED12\_LsgRNA809  
GCCGGATTGCCACCTCTACATCATGGGGCA  
>MED12\_LsgRNA810  
GCCGGATTGCCACCTCTACATCATGGGGCA  
>MED12\_LsgRNA811  
CAGAGATTGCTGCATAGTAGGCACAGGTCA  
>MED12\_LsgRNA812  
CAGAGATTGCTGCATAGTAGGCACAGGTCA  
>MED12\_LsgRNA813  
CTTAGCAAAGATATCTTCAGCAGTGGGGAA  
>MED12\_LsgRNA814  
CTTAGCAAAGATATCTTCAGCAGTGGGGAA  
>MED12\_LsgRNA815  
AGCAGCAAGACCAAGCCTGTGCTCAGGTCTG  
>MED12\_LsgRNA816  
AGCAGCAAGACCAAGCCTGTGCTCAGGTCTG  
>MED12\_LsgRNA817  
AGAGGCAAGTGGTATGACATGCCAAGGGCA  
>MED12\_LsgRNA818  
AGAGGCAAGTGGTATGACATGCCAAGGGCA  
>MED12\_LsgRNA819  
GAGGGCACATAAGCAGGTCACTAAAGGGAG  
>MED12\_LsgRNA820  
GAGGGCACATAAGCAGGTCACTAAAGGGAG  
>MED12\_LsgRNA821  
CGCAGCACCCAGCAGACCACGGAGTGGGCC  
>MED12\_LsgRNA822  
CGCAGCACCCAGCAGACCACGGAGTGGGCC  
>MED12\_LsgRNA823  
TGGGGCACCGCAGGTTGCTGCTGCCGGTAC  
>MED12\_LsgRNA824  
TGGGGCACCGCAGGTTGCTGCTGCCGGTAC  
>MED12\_LsgRNA825  
GGCAGCACTCCAGGGTAAGTTGGTCGGGTG  
>MED12\_LsgRNA826  
GGCAGCACTCCAGGGTAAGTTGGTCGGGTG

>MED12\_LsgRNA827  
GTCAGCAGAGACAGGGTCATCTTCTGGAAG  
>MED12\_LsgRNA828  
GTCAGCAGAGACAGGGTCATCTTCTGGAAG  
>MED12\_LsgRNA829  
AGCAGCAGATCAAGGAGCGGGGACAGGCAG  
>MED12\_LsgRNA830  
AGCAGCAGATCAAGGAGCGGGGACAGGCAG  
>MED12\_LsgRNA831  
AGCAGCAGCAACAGACAGCAGCTTTGGTCC  
>MED12\_LsgRNA832  
AGCAGCAGCAACAGACAGCAGCTTTGGTCC  
>MED12\_LsgRNA833  
ACCAGCAGCAACAGCAGCAACAGGCGGCTC  
>MED12\_LsgRNA834  
ACCAGCAGCAACAGCAGCAACAGGCGGCTC  
>MED12\_LsgRNA835  
AGCAGCAGCAGCAGCAGATCCTGCGGGTAA  
>MED12\_LsgRNA836  
AGCAGCAGCAGCAGCAGATCCTGCGGGTAA  
>MED12\_LsgRNA837  
ATCGGCAGGATCATCAAAGGGAGAGGGAGG  
>MED12\_LsgRNA838  
ATCGGCAGGATCATCAAAGGGAGAGGGAGG  
>MED12\_LsgRNA839  
AGGAGCAGGCGGCTCCTCATCTTCTGGGGG  
>MED12\_LsgRNA840  
AGGAGCAGGCGGCTCCTCATCTTCTGGGGG  
>MED12\_LsgRNA841  
CATTGCAGGTCCGTGCAAAGTTGCGGGAGA  
>MED12\_LsgRNA842  
CATTGCAGGTCCGTGCAAAGTTGCGGGAGA  
>MED12\_LsgRNA843  
ATGTGCAGTTCATCTTCGACCTCATGGAAT  
>MED12\_LsgRNA844  
ATGTGCAGTTCATCTTCGACCTCATGGAAT  
>MED12\_LsgRNA845  
CACTGCCACTGCCCCAGAAGATGAGGAGC  
>MED12\_LsgRNA846  
CACTGCCACTGCCCCAGAAGATGAGGAGC  
>MED12\_LsgRNA847  
CGAAGCCAGCAATCTTGTTGCCCTTGGTAT  
>MED12\_LsgRNA848  
CGAAGCCAGCAATCTTGTTGCCCTTGGTAT

>MED12\_LsgRNA849  
ACCGGCCAGGGCCTGCAGGAAGTGGGGGCT  
>MED12\_LsgRNA850  
ACCGGCCAGGGCCTGCAGGAAGTGGGGGCT  
>MED12\_LsgRNA851  
TGTAGCCATTTAAAGAACAAATTTGGGGAG  
>MED12\_LsgRNA852  
TGTAGCCATTTAAAGAACAAATTTGGGGAG  
>MED12\_LsgRNA853  
TGGTGCCCCACACAGACGTGCATAAGGGCA  
>MED12\_LsgRNA854  
TGGTGCCCCACACAGACGTGCATAAGGGCA  
>MED12\_LsgRNA855  
GGAGGCCCCAGCCGCGGCCGCTTCAGGGGC  
>MED12\_LsgRNA856  
GGAGGCCCCAGCCGCGGCCGCTTCAGGGGC  
>MED12\_LsgRNA857  
CAGAGCCCCCAAACACTGACAAAACCGGGGG  
>MED12\_LsgRNA858  
CAGAGCCCCCAAACACTGACAAAACCGGGGG  
>MED12\_LsgRNA859  
ACCGGCCCTGAAGCGGCCGCGGCTGGGGC  
>MED12\_LsgRNA860  
ACCGGCCCTGAAGCGGCCGCGGCTGGGGC  
>MED12\_LsgRNA861  
TAGGGCCCTTGCCCCATGATGTAGAGGTGG  
>MED12\_LsgRNA862  
TAGGGCCCTTGCCCCATGATGTAGAGGTGG  
>MED12\_LsgRNA863  
CCCAGCCGCGGCCGCTTCAGGGGCCGCTGT  
>MED12\_LsgRNA864  
CCCAGCCGCGGCCGCTTCAGGGGCCGCTGT  
>MED12\_LsgRNA865  
CGGGGCCGGGCCTCAGGTGTGTGTGGTAG  
>MED12\_LsgRNA866  
CGGGGCCGGGCCTCAGGTGTGTGTGGTAG  
>MED12\_LsgRNA867  
TGAAGCCGTCAGCACCACTCTCTTGGGGCT  
>MED12\_LsgRNA868  
TGAAGCCGTCAGCACCACTCTCTTGGGGCT  
>MED12\_LsgRNA869  
TCTTGCCTAGCCCCGTGTAGGTGAAGGTGT  
>MED12\_LsgRNA870  
TCTTGCCTAGCCCCGTGTAGGTGAAGGTGT



>MED12\_LsgRNA871  
GAGTGCCTCATGCATAAGCTGCTTTGGTTT  
>MED12\_LsgRNA872  
GAGTGCCTCATGCATAAGCTGCTTTGGTTT  
>MED12\_LsgRNA873  
TGGGGCCTCCCGATGTTTACCCTCAGGACC  
>MED12\_LsgRNA874  
TGGGGCCTCCCGATGTTTACCCTCAGGACC  
>MED12\_LsgRNA875  
CTGCGCCTGGGCACTACTCAAACTGGGTC  
>MED12\_LsgRNA876  
CTGCGCCTGGGCACTACTCAAACTGGGTC  
>MED12\_LsgRNA877  
TGCAGCGCAGCACCCAGCAGACCACGGAGT  
>MED12\_LsgRNA878  
GGCAGCGCATAAAGCGCATTCTCCAGGTAG  
>MED12\_LsgRNA879  
GGCAGCGCATAAAGCGCATTCTCCAGGTAG  
>MED12\_LsgRNA880  
GACAGCGCCTTCGCCAACAGCTCCAGGCAA  
>MED12\_LsgRNA881  
GACAGCGCCTTCGCCAACAGCTCCAGGCAA  
>MED12\_LsgRNA882  
TACAGCGCTCTGCAGAGGAGCCATCGGACC  
>MED12\_LsgRNA883  
TACAGCGCTCTGCAGAGGAGCCATCGGACC  
>MED12\_LsgRNA884  
GAATGCGCTTTATGCGCTGCCGCTGGGGGT  
>MED12\_LsgRNA885  
GAATGCGCTTTATGCGCTGCCGCTGGGGGT  
>MED12\_LsgRNA886  
ACCAGCGGTTGGTCGTACTGTTTGGGGTGG  
>MED12\_LsgRNA887  
AGTAGCGTCCAAATATGTTGGTACTGGGCT  
>MED12\_LsgRNA888  
AGTAGCGTCCAAATATGTTGGTACTGGGCT  
>MED12\_LsgRNA889  
TGGTGCTAACATGTCTGAAAGGGCAGGATG  
>MED12\_LsgRNA890  
TGGTGCTAACATGTCTGAAAGGGCAGGATG  
>MED12\_LsgRNA891  
AGCAGCTACCTGGGGCTGGGACTGGGGCTG  
>MED12\_LsgRNA892  
AGCAGCTACCTGGGGCTGGGACTGGGGCTG

>MED12\_LsgRNA893  
GACTGCTCACACCATCCAGCTGCAGGGCCA  
>MED12\_LsgRNA894  
TGCAGCTCACACCTTACCTACACGGGGCT  
>MED12\_LsgRNA895  
TGCAGCTCACACCTTACCTACACGGGGCT  
>MED12\_LsgRNA896  
TGTGGCTCACACGTGATGACATCTCGGGTC  
>MED12\_LsgRNA897  
TGTGGCTCACACGTGATGACATCTCGGGTC  
>MED12\_LsgRNA898  
ATGAGCTGCATGAGGCGCTGCGCCTGGGCA  
>MED12\_LsgRNA899  
ATGAGCTGCATGAGGCGCTGCGCCTGGGCA  
>MED12\_LsgRNA900  
ACGTGCTGCGCAGCATCTGCCAACAGGTCA  
>MED12\_LsgRNA901  
ACGTGCTGCGCAGCATCTGCCAACAGGTCA  
>MED12\_LsgRNA902  
GCTGGCTGCGTTTCTTGCCCTTGGTGGACT  
>MED12\_LsgRNA903  
GCTGGCTGCGTTTCTTGCCCTTGGTGGACT  
>MED12\_LsgRNA904  
TGCTGCTGCTGCTGCTGCCGGATGTGGTAC  
>MED12\_LsgRNA905  
TGCTGCTGCTGCTGCTGCCGGATGTGGTAC  
>MED12\_LsgRNA906  
TGCTGCTGCTGCTGCTGCTCAGGTAGGATG  
>MED12\_LsgRNA907  
TGCTGCTGCTGCTGCTGCTCAGGTAGGATG  
>MED12\_LsgRNA908  
AGAAGCTGGCCATGTTTCATGTTTCAGGTAG  
>MED12\_LsgRNA909  
AGAAGCTGGCCATGTTTCATGTTTCAGGTAG  
>MED12\_LsgRNA910  
TGCTGCTGGGTCTGCTGAAGCCCCTGGCGC  
>MED12\_LsgRNA911  
TGCTGCTGGGTCTGCTGAAGCCCCTGGCGC  
>MED12\_LsgRNA912  
ATGGGCTGTCAGCTGCAAGCGTTCTGGTTCG  
>MED12\_LsgRNA913  
ATGGGCTGTCAGCTGCAAGCGTTCTGGTTCG  
>MED12\_LsgRNA914  
CTGTGCTGTCCTAGTGCCTTGGTTTGGCAC

>MED12\_LsgRNA915  
GCCTGCTGTCTCTGGGGATGAGCATGGCAG  
>MED12\_LsgRNA916  
GCCTGCTGTCTCTGGGGATGAGCATGGCAG  
>MED12\_LsgRNA917  
AGCTGCTTCTCAAATCCTCGGATCTGGTGG  
>MED12\_LsgRNA918  
AGCTGCTTCTCAAATCCTCGGATCTGGTGG  
>MED12\_LsgRNA919  
GTCTGCTTGGGCAGTGGCAGCAGCTGGCGA  
>MED12\_LsgRNA920  
GTCTGCTTGGGCAGTGGCAGCAGCTGGCGA  
>MED12\_LsgRNA921  
ATGCGCTTTATGCGCTGCCGCTGGGGTTT  
>MED12\_LsgRNA922  
CTATGGAATGGGCCCGGGTCCGAGCGGCC  
>MED12\_LsgRNA923  
CTATGGAATGGGCCCGGGTCCGAGCGGCC  
>MED12\_LsgRNA924  
CCAGGGACATGTGTTAAAGGCTGCTGGGGA  
>MED12\_LsgRNA925  
CCAGGGACATGTGTTAAAGGCTGCTGGGGA  
>MED12\_LsgRNA926  
GAACGGACGCCTGCCTGGACGCCCTGGGCA  
>MED12\_LsgRNA927  
GAACGGACGCCTGCCTGGACGCCCTGGGCA  
>MED12\_LsgRNA928  
CACAGGACGGTATGGGTCCACACGAGGGCC  
>MED12\_LsgRNA929  
CACAGGACGGTATGGGTCCACACGAGGGCC  
>MED12\_LsgRNA930  
GGATGGACTGCCCTTCCCCTCACAGGGCAT  
>MED12\_LsgRNA931  
GGATGGACTGCCCTTCCCCTCACAGGGCAT  
>MED12\_LsgRNA932  
AAAGGGAGAGGGAGGCCGGGGACCAGGGGC  
>MED12\_LsgRNA933  
AAAGGGAGAGGGAGGCCGGGGACCAGGGGC  
>MED12\_LsgRNA934  
TGCGGGAGATCGAGCAGCAGATCAAGGAGC  
>MED12\_LsgRNA935  
TGCGGGAGATCGAGCAGCAGATCAAGGAGC  
>MED12\_LsgRNA936  
TGGGGGAGCGCCAGTCAGACAGTCTGGAAA

>MED12\_LsgRNA937  
TGGGGGAGCGCCAGTCAGACAGTCTGGAAA  
>MED12\_LsgRNA938  
GTCCGGAGGCACTGTCACACCATAAGGGCC  
>MED12\_LsgRNA939  
GTCCGGAGGCACTGTCACACCATAAGGGCC  
>MED12\_LsgRNA940  
CGGGGAGGCGCTCACCTCTGTCTTGGTAG  
>MED12\_LsgRNA941  
GAGTGGAGGTCAGTCCATGTCCATAGGTGG  
>MED12\_LsgRNA942  
GAGTGGAGGTCAGTCCATGTCCATAGGTGG  
>MED12\_LsgRNA943  
AGAAGGAGGTGAAGCCCCACCCAAGGAGA  
>MED12\_LsgRNA944  
AGAAGGAGGTGAAGCCCCACCCAAGGAGA  
>MED12\_LsgRNA945  
GGCTGGAGTAGCTGGGGGCACCATGGTAC  
>MED12\_LsgRNA946  
GGCTGGAGTAGCTGGGGGCACCATGGTAC  
>MED12\_LsgRNA947  
CATTGGAGTCATGGTACTTATCATGGGTGT  
>MED12\_LsgRNA948  
CATTGGAGTCATGGTACTTATCATGGGTGT  
>MED12\_LsgRNA949  
CCACGGAGTGGGCCATGCTCCTCCTGGAGA  
>MED12\_LsgRNA950  
CCACGGAGTGGGCCATGCTCCTCCTGGAGA  
>MED12\_LsgRNA951  
GGCAGGATCATCAAAGGGAGAGGGAGGCCG  
>MED12\_LsgRNA952  
TTCGGGATCTTGAGCTACGAACACCGGCC  
>MED12\_LsgRNA953  
TTCGGGATCTTGAGCTACGAACACCGGCC  
>MED12\_LsgRNA954  
TCCAGGATGTCCTCCTGCAGTTTCTGGATA  
>MED12\_LsgRNA955  
TCCAGGATGTCCTCCTGCAGTTTCTGGATA  
>MED12\_LsgRNA956  
TGCCGGATTGCCACCTCTACATCATGGGGC  
>MED12\_LsgRNA957  
TGCCGGATTGCCACCTCTACATCATGGGGC  
>MED12\_LsgRNA958  
CTTTGGATTGGGACCTAGCAAGGATGGGCA

>MED12\_LsgRNA959  
CTTTGGATTGGGACCTAGCAAGGATGGGCA  
>MED12\_LsgRNA960  
TCCAGGCACTACTCACATTGTTAGGGGTCT  
>MED12\_LsgRNA961  
TGAAGGCACTGTTACCCTCTGGCATGGGCA  
>MED12\_LsgRNA962  
TGAAGGCACTGTTACCCTCTGGCATGGGCA  
>MED12\_LsgRNA963  
GATGGGCAGAAGCGGCGACGCAACCGGCCT  
>MED12\_LsgRNA964  
GATGGGCAGAAGCGGCGACGCAACCGGCCT  
>MED12\_LsgRNA965  
TGTGGGCAGCACTCCAGGGTAAGTTGGTTCG  
>MED12\_LsgRNA966  
TGTGGGCAGCACTCCAGGGTAAGTTGGTTCG  
>MED12\_LsgRNA967  
CATCGGCAGGATCATCAAAGGGAGAGGGAG  
>MED12\_LsgRNA968  
CATCGGCAGGATCATCAAAGGGAGAGGGAG  
>MED12\_LsgRNA969  
AGGTGGCAGTGGTGGTTCGGAGGCAGGGTGG  
>MED12\_LsgRNA970  
AGGTGGCAGTGGTGGTTCGGAGGCAGGGTGG  
>MED12\_LsgRNA971  
TACCGGCCAGGGCCTGCAGGAAGTGGGGGC  
>MED12\_LsgRNA972  
TACCGGCCAGGGCCTGCAGGAAGTGGGGGC  
>MED12\_LsgRNA973  
GCATGGCCCACTCCGTGGTCTGCTGGGTGC  
>MED12\_LsgRNA974  
GCATGGCCCACTCCGTGGTCTGCTGGGTGC  
>MED12\_LsgRNA975  
AGCAGGCGGCTCCTCATCTTCTGGGGGCAG  
>MED12\_LsgRNA976  
AGCAGGCGGCTCCTCATCTTCTGGGGGCAG  
>MED12\_LsgRNA977  
TTTTGGCTAGTTGCGTGAGTGGCTTGGTGC  
>MED12\_LsgRNA978  
TTTTGGCTAGTTGCGTGAGTGGCTTGGTGC  
>MED12\_LsgRNA979  
CAGTGGCTCCAGGTAATAGGCGCGGGGCCG  
>MED12\_LsgRNA980  
CAGTGGCTCCAGGTAATAGGCGCGGGGCCG

>MED12\_LsgRNA981  
ACAGGGCTCCCTTATCGATAACCAAGGGCAA  
>MED12\_LsgRNA982  
ACAGGGCTCCCTTATCGATAACCAAGGGCAA  
>MED12\_LsgRNA983  
CTCAGGCTCTAGCAGGGTAGGAGCAGGCGG  
>MED12\_LsgRNA984  
CTCAGGCTCTAGCAGGGTAGGAGCAGGCGG  
>MED12\_LsgRNA985  
CGGGGGCTGCTCCACCCAGTACTGAGGAAC  
>MED12\_LsgRNA986  
CGGGGGCTGCTCCACCCAGTACTGAGGAAC  
>MED12\_LsgRNA987  
GTAAGGCTGGCTGGAGTAGCTGGGGGGCAC  
>MED12\_LsgRNA988  
GTAAGGCTGGCTGGAGTAGCTGGGGGGCAC  
>MED12\_LsgRNA989  
TTGGGGCTTCCTGCGACCAGTGTGTCAGGAAG  
>MED12\_LsgRNA990  
TTGGGGCTTCCTGCGACCAGTGTGTCAGGAAG  
>MED12\_LsgRNA991  
CACAGGCTTGGTCTTGCTGCTGCTGGGCAT  
>MED12\_LsgRNA992  
CACAGGCTTGGTCTTGCTGCTGCTGGGCAT  
>MED12\_LsgRNA993  
GCTGGGAATAGTACCTGGGGGATGGGAAA  
>MED12\_LsgRNA994  
GCTGGGAATAGTACCTGGGGGATGGGAAA  
>MED12\_LsgRNA995  
AAATGGGAGCACTGGGAGCAGAAAGGGAGC  
>MED12\_LsgRNA996  
AAATGGGAGCACTGGGAGCAGAAAGGGAGC  
>MED12\_LsgRNA997  
CACTGGGAGCAGAAAGGGAGCCAGAGGCGA  
>MED12\_LsgRNA998  
CACTGGGAGCAGAAAGGGAGCCAGAGGCGA  
>MED12\_LsgRNA999  
TTCTGGGAGGCAGCCAGCAGGTGGCGGTTCG  
>MED12\_LsgRNA1000  
GAAAGGGCAGGATGAACAACGCGAGGGACT  
>MED12\_LsgRNA1001  
GAAAGGGCAGGATGAACAACGCGAGGGACT  
>MED12\_LsgRNA1002  
AGGTGGGCAGTTTAGCAATGAGGGGGGCCA

>MED12\_LsgRNA1003  
AGGTGGGCAGTTTAGCAATGAGGGGGGCCA  
>MED12\_LsgRNA1004  
CACTGGGCCGCTGTTGCAGGTGGCGGGTAG  
>MED12\_LsgRNA1005  
CACTGGGCCGCTGTTGCAGGTGGCGGGTAG  
>MED12\_LsgRNA1006  
CCCAGGGCGAGATCTTCTGTTTGGTGGAAA  
>MED12\_LsgRNA1007  
CCCAGGGCGAGATCTTCTGTTTGGTGGAAA  
>MED12\_LsgRNA1008  
CACAGGGCTCCCTTATCGATAACCAAGGGCA  
>MED12\_LsgRNA1009  
CACAGGGCTCCCTTATCGATAACCAAGGGCA  
>MED12\_LsgRNA1010  
TGCTGGGGAATAGTACCTGGGGGATGGGAA  
>MED12\_LsgRNA1011  
TGCTGGGGAATAGTACCTGGGGGATGGGAA  
>MED12\_LsgRNA1012  
CTGGGGGCACCATGGTACCTGCAGGGCCT  
>MED12\_LsgRNA1013  
CTGGGGGCACCATGGTACCTGCAGGGCCT  
>MED12\_LsgRNA1014  
TCTGGGGCAGTGGCAGTGGCTCCAGGTAA  
>MED12\_LsgRNA1015  
TCTGGGGCAGTGGCAGTGGCTCCAGGTAA  
>MED12\_LsgRNA1016  
GTGTGGGGCCTCTATCACAGAACTTGGACC  
>MED12\_LsgRNA1017  
AGTGGGGCTGTGGTTCCACGATAGGGCCC  
>MED12\_LsgRNA1018  
AGTGGGGCTGTGGTTCCACGATAGGGCCC  
>MED12\_LsgRNA1019  
GCTGGGGGCACCATGGTACCTGCAGGGCC  
>MED12\_LsgRNA1020  
GCTGGGGGCACCATGGTACCTGCAGGGCC  
>MED12\_LsgRNA1021  
AAGTGGGGCTGTGGTTCCACGATAGGGCC  
>MED12\_LsgRNA1022  
AAGTGGGGCTGTGGTTCCACGATAGGGCC  
>MED12\_LsgRNA1023  
GTTTGGGGTCCTGAGGGTAAACATCGGGAG  
>MED12\_LsgRNA1024  
GTTTGGGGTCCTGAGGGTAAACATCGGGAG

>MED12\_LsgRNA1025  
TTTGGGGTCCTGAGGGTAAACATCGGGAGG  
>MED12\_LsgRNA1026  
GGCAGGGTGGCCGCAACATCTCTGTGGAGA  
>MED12\_LsgRNA1027  
GGCAGGGTGGCCGCAACATCTCTGTGGAGA  
>MED12\_LsgRNA1028  
GTTTGGGTGGTGCAGGAGGTCCGGAGGCAC  
>MED12\_LsgRNA1029  
GTTTGGGTGGTGCAGGAGGTCCGGAGGCAC  
>MED12\_LsgRNA1030  
CATTGGTAAGCGCACAGGACGGTATGGGTC  
>MED12\_LsgRNA1031  
CATTGGTAAGCGCACAGGACGGTATGGGTC  
>MED12\_LsgRNA1032  
TGGAGGTCAGTCCATGTCCATAGGTGGGGG  
>MED12\_LsgRNA1033  
TGGAGGTCAGTCCATGTCCATAGGTGGGGG  
>MED12\_LsgRNA1034  
TGTTGGTCATAATGTGAAAGGTGCTGGAAC  
>MED12\_LsgRNA1035  
TGTTGGTCATAATGTGAAAGGTGCTGGAAC  
>MED12\_LsgRNA1036  
CAAGGGTCCCTTCAATCTTCTCCTTGGGTG  
>MED12\_LsgRNA1037  
CAAGGGTCCCTTCAATCTTCTCCTTGGGTG  
>MED12\_LsgRNA1038  
GGTGGGTGCTCTGGTAAGGCTGGCTGGAGT  
>MED12\_LsgRNA1039  
GGTGGGTGCTCTGGTAAGGCTGGCTGGAGT  
>MED12\_LsgRNA1040  
GGCCGGTGCTGAGGGCACATAAGCAGGTCA  
>MED12\_LsgRNA1041  
GGCCGGTGCTGAGGGCACATAAGCAGGTCA  
>MED12\_LsgRNA1042  
AGCAGGTGGCGGTTCGAGGAGGAGCGGATT  
>MED12\_LsgRNA1043  
AGCAGGTGGCGGTTCGAGGAGGAGCGGATT  
>MED12\_LsgRNA1044  
CTGAGGTGGGCAGTTTAGCAATGAGGGGGG  
>MED12\_LsgRNA1045  
AGCGGGTGGGGATGCTTTACTTGTGGACT  
>MED12\_LsgRNA1046  
AGCGGGTGGGGATGCTTTACTTGTGGACT



>MED12\_LsgRNA1047  
GGCAGGTGGGGGGCATGTTTGACACGGTGC  
>MED12\_LsgRNA1048  
GGCAGGTGGGGGGCATGTTTGACACGGTGC  
>MED12\_LsgRNA1049  
GAAGGGTGGGTGCTCTGGTAAGGCTGGCTG  
>MED12\_LsgRNA1050  
GAAGGGTGGGTGCTCTGGTAAGGCTGGCTG  
>MED12\_LsgRNA1051  
CTGTGGTGTCAATTGCTATGTGAATGGGCTG  
>MED12\_LsgRNA1052  
CTGTGGTGTCAATTGCTATGTGAATGGGCTG  
>MED12\_LsgRNA1053  
GAAAGGTTCAAGCTTCACTGTGACAGGAGG  
>MED12\_LsgRNA1054  
GAAAGGTTCAAGCTTCACTGTGACAGGAGG  
>MED12\_LsgRNA1055  
TTCAGTAAGAAGGAAGAGGTGTTTGGGTAC  
>MED12\_LsgRNA1056  
ATTGGTAAGCGCACAGGACGGTATGGGTCC  
>MED12\_LsgRNA1057  
ATTGGTAAGCGCACAGGACGGTATGGGTCC  
>MED12\_LsgRNA1058  
TCTGGTAAGGCTGGCTGGAGTAGCTGGGGG  
>MED12\_LsgRNA1059  
TCTGGTAAGGCTGGCTGGAGTAGCTGGGGG  
>MED12\_LsgRNA1060  
GCCCGTACACAGAGGTCTTATAAGAGGAGG  
>MED12\_LsgRNA1061  
GCCCGTACACAGAGGTCTTATAAGAGGAGG  
>MED12\_LsgRNA1062  
CTCAGTACTGGGTGGAGCAGCCCCGGTTT  
>MED12\_LsgRNA1063  
CTCAGTACTGGGTGGAGCAGCCCCGGTTT  
>MED12\_LsgRNA1064  
TAGTGTAGCTGCCACCAGATCCGAGGATT  
>MED12\_LsgRNA1065  
TAGTGTAGCTGCCACCAGATCCGAGGATT  
>MED12\_LsgRNA1066  
CTTGGTATCGATAAGGGAGCCCTGTGGCTC  
>MED12\_LsgRNA1067  
CTTGGTATCGATAAGGGAGCCCTGTGGCTC  
>MED12\_LsgRNA1068  
CAGGGTCACTTACTTCCATCAGACTGGCAA

>MED12\_LsgRNA1069  
CAGGGTCACTTACTTCCATCAGACTGGCAA  
>MED12\_LsgRNA1070  
GAATGTCAGGTCTCCAGGATTCAGAGGCAC  
>MED12\_LsgRNA1071  
GAATGTCAGGTCTCCAGGATTCAGAGGCAC  
>MED12\_LsgRNA1072  
GGAGGTCAGTCCATGTCCATAGGTGGGGGC  
>MED12\_LsgRNA1073  
GGAGGTCAGTCCATGTCCATAGGTGGGGGC  
>MED12\_LsgRNA1074  
CCAAGTCAGTGAACCAAGTGTAAATGGCAC  
>MED12\_LsgRNA1075  
CCAAGTCAGTGAACCAAGTGTAAATGGCAC  
>MED12\_LsgRNA1076  
CTGGGTCATCGGCAGGATCATCAAAGGGAG  
>MED12\_LsgRNA1077  
CTGGGTCATCGGCAGGATCATCAAAGGGAG  
>MED12\_LsgRNA1078  
TGTAGTCCAGCAGCTACCTGGGGCTGGGAC  
>MED12\_LsgRNA1079  
TGTAGTCCAGCAGCTACCTGGGGCTGGGAC  
>MED12\_LsgRNA1080  
CCATGTCCATAGGTGGGGCCTGCTGGTGC  
>MED12\_LsgRNA1081  
CCATGTCCATAGGTGGGGCCTGCTGGTGC  
>MED12\_LsgRNA1082  
AACTGTCCCCTCAGGTGGGGAGGATGGGCA  
>MED12\_LsgRNA1083  
AACTGTCCCCTCAGGTGGGGAGGATGGGCA  
>MED12\_LsgRNA1084  
AAGGGTCCCTTCAATCTTCTCCTTGGGTGG  
>MED12\_LsgRNA1085  
AAGGGTCCCTTCAATCTTCTCCTTGGGTGG  
>MED12\_LsgRNA1086  
TCTGGTCCCTGGTTGAGGATGAGGCAGGCAT  
>MED12\_LsgRNA1087  
GGGAGTCGAGGGTGTGCTGCTAGTTGGGGG  
>MED12\_LsgRNA1088  
GGGAGTCGAGGGTGTGCTGCTAGTTGGGGG  
>MED12\_LsgRNA1089  
GATGGTCGTGTCTTACAGTACTCTGGGGA  
>MED12\_LsgRNA1090  
GATGGTCGTGTCTTACAGTACTCTGGGGA

>MED12\_LsgRNA1091  
CCAAGTCTCACATCAACATTGCAGAGGAGA  
>MED12\_LsgRNA1092  
CCAAGTCTCACATCAACATTGCAGAGGAGA  
>MED12\_LsgRNA1093  
TACTGTGAGGTACCTAAGAATGTCAGGTCT  
>MED12\_LsgRNA1094  
TACTGTGAGGTACCTAAGAATGTCAGGTCT  
>MED12\_LsgRNA1095  
GAACGTGATCGACAAAAGCAGAAGAGGTAA  
>MED12\_LsgRNA1096  
GAACGTGATCGACAAAAGCAGAAGAGGTAA  
>MED12\_LsgRNA1097  
CTTGGTGATGATCTGAGTCCATTCTGGAGG  
>MED12\_LsgRNA1098  
CTTGGTGATGATCTGAGTCCATTCTGGAGG  
>MED12\_LsgRNA1099  
CCTGGTGCACCTGGCTGTAGAGGGAGGTAA  
>MED12\_LsgRNA1100  
CCTGGTGCACCTGGCTGTAGAGGGAGGTAA  
>MED12\_LsgRNA1101  
ACCTGTGCCATCTGGTCCTGGTTGAGGATG  
>MED12\_LsgRNA1102  
ACCTGTGCCATCTGGTCCTGGTTGAGGATG  
>MED12\_LsgRNA1103  
TTATGTGCCCTCAGCACCGGCCCTGGTTT  
>MED12\_LsgRNA1104  
TTATGTGCCCTCAGCACCGGCCCTGGTTT  
>MED12\_LsgRNA1105  
TCCTGTGCCTGCAGAAGGAGTTGGGGGAGC  
>MED12\_LsgRNA1106  
TCCTGTGCCTGCAGAAGGAGTTGGGGGAGC  
>MED12\_LsgRNA1107  
TGGAGTGCTGCCCACAACCATGACTGGCGT  
>MED12\_LsgRNA1108  
TGGAGTGCTGCCCACAACCATGACTGGCGT  
>MED12\_LsgRNA1109  
GGGTGTGCTGCTAGTTGGGGGCTGAGGAGC  
>MED12\_LsgRNA1110  
GGGTGTGCTGCTAGTTGGGGGCTGAGGAGC  
>MED12\_LsgRNA1111  
CCGAGTGGACCGGCGAGTGGCTCGAGGAGA  
>MED12\_LsgRNA1112  
CCGAGTGGACCGGCGAGTGGCTCGAGGAGA

>MED12\_LsgRNA1113  
GGCAGTGGCTCCAGGTAATAGGCGCGGGGC  
>MED12\_LsgRNA1114  
GGCAGTGGCTCCAGGTAATAGGCGCGGGGC  
>MED12\_LsgRNA1115  
GGTAGTGGCTGGTTCTGGGTGTACAGGCCT  
>MED12\_LsgRNA1116  
GGTAGTGGCTGGTTCTGGGTGTACAGGCCT  
>MED12\_LsgRNA1117  
GGCAGTGGGATTACACCGAGAAGCTGGCCA  
>MED12\_LsgRNA1118  
GGCAGTGGGATTACACCGAGAAGCTGGCCA  
>MED12\_LsgRNA1119  
TCATGTGGGATTGCAGCAACACACAGGCC  
>MED12\_LsgRNA1120  
TCATGTGGGATTGCAGCAACACACAGGCC  
>MED12\_LsgRNA1121  
TCAGGTGGGGAGGATGGGCAGAAGCGGCGA  
>MED12\_LsgRNA1122  
TCAGGTGGGGAGGATGGGCAGAAGCGGCGA  
>MED12\_LsgRNA1123  
AGGTGTGTTATAGAACCAGGGTTTGGGTGG  
>MED12\_LsgRNA1124  
AGGTGTGTTATAGAACCAGGGTTTGGGTGG  
>MED12\_LsgRNA1125  
ACATGTTAGCACCAGCGATAAGAAGGGCTG  
>MED12\_LsgRNA1126  
ACATGTTAGCACCAGCGATAAGAAGGGCTG  
>MED12\_LsgRNA1127  
AGAAGTTATCCTTCTGGTTCACCTTGGGGCT  
>MED12\_LsgRNA1128  
AGAAGTTATCCTTCTGGTTCACCTTGGGGCT  
>MED12\_LsgRNA1129  
TTATGTTCTATGCCCTCAGGATCCAGGGCT  
>MED12\_LsgRNA1130  
TTATGTTCTATGCCCTCAGGATCCAGGGCT  
>MED12\_LsgRNA1131  
GCTGGTTCTGGGTGTACAGGCCTATGGAGC  
>MED12\_LsgRNA1132  
GCTGGTTCTGGGTGTACAGGCCTATGGAGC  
>MED12\_LsgRNA1133  
TCTTGTGCCCCTTGGTATCGATAAAGGGAGC  
>MED12\_LsgRNA1134  
TCTTGTGCCCCTTGGTATCGATAAAGGGAGC

>MED12\_LsgRNA1135  
AGCTGTTGGCGAAGGCGCTGTCCTTGGGGC  
>MED12\_LsgRNA1136  
AGCTGTTGGCGAAGGCGCTGTCCTTGGGGC  
>MED12\_LsgRNA1137  
ATATGTTGGTACTGGGCTGTGGCTGGGTAT  
>MED12\_LsgRNA1138  
ATATGTTGGTACTGGGCTGTGGCTGGGTAT  
>MED12\_LsgRNA1139  
AGCGGTTGGTCGTA CTGTTTGGGGTGGGAA  
>MED12\_LsgRNA1140  
AGCGGTTGGTCGTA CTGTTTGGGGTGGGAA  
>MED12\_LsgRNA1141  
ACTTGTGTGGCCCTGGCAGGTGGGGGGCA  
>MED12\_LsgRNA1142  
TTTGGTTTGCAATCATCTAAGTACTGGTCA  
>MED12\_LsgRNA1143  
TTTGGTTTGCAATCATCTAAGTACTGGTCA  
>MED12\_LsgRNA1144  
GTTCTAAACCCATGACGCCAGTCATGGTTG  
>MED12\_LsgRNA1145  
GTTCTAAACCCATGACGCCAGTCATGGTTG  
>MED12\_LsgRNA1146  
CCATTAACACTTGGTTCACTGACTTGGCTG  
>MED12\_LsgRNA1147  
CCATTAACACTTGGTTCACTGACTTGGCTG  
>MED12\_LsgRNA1148  
AGGGTAACAGTGCCTTCACTCAGCAGGTAT  
>MED12\_LsgRNA1149  
AGGGTAACAGTGCCTTCACTCAGCAGGTAT  
>MED12\_LsgRNA1150  
TCAATAACCAGCCTGCTGTCTCTGGGGATG  
>MED12\_LsgRNA1151  
TCAATAACCAGCCTGCTGTCTCTGGGGATG  
>MED12\_LsgRNA1152  
TCTGTA ACTGCTCCCATAAGTACTTGGTGA  
>MED12\_LsgRNA1153  
TCTGTA ACTGCTCCCATAAGTACTTGGTGA  
>MED12\_LsgRNA1154  
CTGGTAAGGCTGGCTGGAGTAGCTGGGGGG  
>MED12\_LsgRNA1155  
CTGGTAAGGCTGGCTGGAGTAGCTGGGGGG  
>MED12\_LsgRNA1156  
TAGTTAAGGTGTGTTATAGAACCAGGGTTT

>MED12\_LsgRNA1157  
TAGTTAAGGTGTGTTATAGAACCAGGGTTT  
>MED12\_LsgRNA1158  
AGGATACAGCTGAGGCCAAAAACCAGGGGC  
>MED12\_LsgRNA1159  
ATAGTACCTGGGGGATGGGAAAATGGGTGG  
>MED12\_LsgRNA1160  
ATAGTACCTGGGGGATGGGAAAATGGGTGG  
>MED12\_LsgRNA1161  
TGAATACTACCGCCAGGGCCTGCAGGAAG  
>MED12\_LsgRNA1162  
TGAATACTACCGCCAGGGCCTGCAGGAAG  
>MED12\_LsgRNA1163  
CCCCTACTATGCCCTGTGAGGGGAAGGGCA  
>MED12\_LsgRNA1164  
CCCCTACTATGCCCTGTGAGGGGAAGGGCA  
>MED12\_LsgRNA1165  
GCACTACTCAACACTGGGTCTTGCAGGTCA  
>MED12\_LsgRNA1166  
GCACTACTCAACACTGGGTCTTGCAGGTCA  
>MED12\_LsgRNA1167  
GCTATACTCCTTATGTTTCTCATGTGGGAT  
>MED12\_LsgRNA1168  
GCTATACTCCTTATGTTTCTCATGTGGGAT  
>MED12\_LsgRNA1169  
GATGTAGAGGTGGCAATCCGGCAGTGGGAT  
>MED12\_LsgRNA1170  
GATGTAGAGGTGGCAATCCGGCAGTGGGAT  
>MED12\_LsgRNA1171  
CCTTTAGCAGAGTCAGGGCATGTTGGGACA  
>MED12\_LsgRNA1172  
CCTTTAGCAGAGTCAGGGCATGTTGGGACA  
>MED12\_LsgRNA1173  
TGTCTAGCATCTCGCAAGGTAGCATGGAGG  
>MED12\_LsgRNA1174  
TGTCTAGCATCTCGCAAGGTAGCATGGAGG  
>MED12\_LsgRNA1175  
TTGCTAGGTCCCAATCCAAAGATTCGGTTA  
>MED12\_LsgRNA1176  
TTGCTAGGTCCCAATCCAAAGATTCGGTTA  
>MED12\_LsgRNA1177  
CGTGTAGGTGAAGGTGTGAGCTGCAGGGTT  
>MED12\_LsgRNA1178  
CGTGTAGGTGAAGGTGTGAGCTGCAGGGTT

>MED12\_LsgRNA1179  
TGAGTAGTGCCAAACCAAGGCACTAGGACA  
>MED12\_LsgRNA1180  
TGAGTAGTGCCAAACCAAGGCACTAGGACA  
>MED12\_LsgRNA1181  
ACCCTAGTTCCAGTGTCTCTTTGAGGACA  
>MED12\_LsgRNA1182  
ACCCTAGTTCCAGTGTCTCTTTGAGGACA  
>MED12\_LsgRNA1183  
CTGCTAGTTGGGGGCTGAGGAGCAGGGGTG  
>MED12\_LsgRNA1184  
TTTCTATTCTAGATTGTGAATAATTGGCGA  
>MED12\_LsgRNA1185  
TTTCTATTCTAGATTGTGAATAATTGGCGA  
>MED12\_LsgRNA1186  
GTCCTCAAAGAGAACACTGGAAGTGGGTC  
>MED12\_LsgRNA1187  
GTCCTCAAAGAGAACACTGGAAGTGGGTC  
>MED12\_LsgRNA1188  
ATCATCAAAGGGAGAGGGAGGCCGGGGACC  
>MED12\_LsgRNA1189  
ATCATCAAAGGGAGAGGGAGGCCGGGGACC  
>MED12\_LsgRNA1190  
CCCTTCAATCTTCTCCTTGGGTGGGGGCTT  
>MED12\_LsgRNA1191  
CCCTTCAATCTTCTCCTTGGGTGGGGGCTT  
>MED12\_LsgRNA1192  
ATCTTCAGCAGTGGGGAAGGCTTCAGGCCG  
>MED12\_LsgRNA1193  
ATCTTCAGCAGTGGGGAAGGCTTCAGGCCG  
>MED12\_LsgRNA1194  
ACCCTCAGGACCCCAAACAGAAGGAGGTGC  
>MED12\_LsgRNA1195  
ACCCTCAGGACCCCAAACAGAAGGAGGTGC  
>MED12\_LsgRNA1196  
AGGTTTCAGGCTTCACTGTGACAGGAGGAAC  
>MED12\_LsgRNA1197  
AGGTTTCAGGCTTCACTGTGACAGGAGGAAC  
>MED12\_LsgRNA1198  
CTTATCAGGTCTCCCGAATGTTCTGGAGC  
>MED12\_LsgRNA1199  
CTTATCAGGTCTCCCGAATGTTCTGGAGC  
>MED12\_LsgRNA1200  
TCACTCAGTACACCCCATACCTATCGGGAT

>MED12\_LsgRNA1201  
TCACTCAGTACACCCCATACCTATCGGGAT  
>MED12\_LsgRNA1202  
TGGCTCAGTAGCGTCCAAATATGTTGGTAC  
>MED12\_LsgRNA1203  
TGGCTCAGTAGCGTCCAAATATGTTGGTAC  
>MED12\_LsgRNA1204  
GAGGTCAGTCCATGTCCATAGGTGGGGGCC  
>MED12\_LsgRNA1205  
GAGGTCAGTCCATGTCCATAGGTGGGGGCC  
>MED12\_LsgRNA1206  
TGGGTCATCGGCAGGATCATCAAAGGGAGA  
>MED12\_LsgRNA1207  
ATCCTCATTGTCCAGCAGTCGATGTGGATA  
>MED12\_LsgRNA1208  
ATCCTCATTGTCCAGCAGTCGATGTGGATA  
>MED12\_LsgRNA1209  
CCAATCCAAAGATTCGGTTACAAAGGGAGT  
>MED12\_LsgRNA1210  
CCAATCCAAAGATTCGGTTACAAAGGGAGT  
>MED12\_LsgRNA1211  
GTTTTCCAACAGTCAGCAGAGACAGGGTCA  
>MED12\_LsgRNA1212  
GTTTTCCAACAGTCAGCAGAGACAGGGTCA  
>MED12\_LsgRNA1213  
TATTTCCACCCAGTTCAGCGCCAGGGGCT  
>MED12\_LsgRNA1214  
TATTTCCACCCAGTTCAGCGCCAGGGGCT  
>MED12\_LsgRNA1215  
GTAGTCCAGCAGCTACCTGGGGCTGGGACT  
>MED12\_LsgRNA1216  
GTAGTCCAGCAGCTACCTGGGGCTGGGACT  
>MED12\_LsgRNA1217  
GTTCTCCAGCTCTCTAGAGCGCTCTGGTGT  
>MED12\_LsgRNA1218  
GTTCTCCAGCTCTCTAGAGCGCTCTGGTGT  
>MED12\_LsgRNA1219  
AGGATCCAGGGCTCTCAGAATCTATGGACA  
>MED12\_LsgRNA1220  
AGGATCCAGGGCTCTCAGAATCTATGGACA  
>MED12\_LsgRNA1221  
GCACTCCAGGGTAAGTTGGTCGGGTGGGCA  
>MED12\_LsgRNA1222  
GCACTCCAGGGTAAGTTGGTCGGGTGGGCA



>MED12\_LsgRNA1223  
AATGTCCATAGATTCTGAGAGCCCTGGATC  
>MED12\_LsgRNA1224  
AATGTCCATAGATTCTGAGAGCCCTGGATC  
>MED12\_LsgRNA1225  
CGGCTCCATCCACGATGCGGTTCTGGGAGG  
>MED12\_LsgRNA1226  
CGGCTCCATCCACGATGCGGTTCTGGGAGG  
>MED12\_LsgRNA1227  
GCCTTCCCCAGACAAGCCTACAGTAGGAAT  
>MED12\_LsgRNA1228  
GTTCTCCCCTACTATGCCCTGTGAGGGGAA  
>MED12\_LsgRNA1229  
GTTCTCCCCTACTATGCCCTGTGAGGGGAA  
>MED12\_LsgRNA1230  
CCCTTCCCCTCACAGGGCATAGTAGGGGAG  
>MED12\_LsgRNA1231  
CCCTTCCCCTCACAGGGCATAGTAGGGGAG  
>MED12\_LsgRNA1232  
ACTGTCCCCTCAGGTGGGGAGGATGGGCAG  
>MED12\_LsgRNA1233  
ACTGTCCCCTCAGGTGGGGAGGATGGGCAG  
>MED12\_LsgRNA1234  
CATCTCCCGAGGGGACCTTGCCTTTGGAGC  
>MED12\_LsgRNA1235  
CATCTCCCGAGGGGACCTTGCCTTTGGAGC  
>MED12\_LsgRNA1236  
TGACTCCCTTTGTAACCGAATCTTTGGATT  
>MED12\_LsgRNA1237  
TGACTCCCTTTGTAACCGAATCTTTGGATT  
>MED12\_LsgRNA1238  
CGGCTCCTCATCTTCTGGGGCAGTGGCAG  
>MED12\_LsgRNA1239  
CGGCTCCTCATCTTCTGGGGCAGTGGCAG  
>MED12\_LsgRNA1240  
CTTTTCCTCCTTAGGCTTCACCATTGGACG  
>MED12\_LsgRNA1241  
CTTTTCCTCCTTAGGCTTCACCATTGGACG  
>MED12\_LsgRNA1242  
CTGCTCCTCTAACAATGGCACTTGTGGTTT  
>MED12\_LsgRNA1243  
CTGCTCCTCTAACAATGGCACTTGTGGTTT  
>MED12\_LsgRNA1244  
GGGGTCCTGAGGGTAAACATCGGGAGGCC

>MED12\_LsgRNA1245  
GGGGTCCTGAGGGTAAACATCGGGAGGCC  
>MED12\_LsgRNA1246  
GGCTTCCTGCGACCAGTGTTCAGGAAGGGTA  
>MED12\_LsgRNA1247  
GGCTTCCTGCGACCAGTGTTCAGGAAGGGTA  
>MED12\_LsgRNA1248  
GACATCCTGGAAAATGGGAGCACTGGGAGC  
>MED12\_LsgRNA1249  
GACATCCTGGAAAATGGGAGCACTGGGAGC  
>MED12\_LsgRNA1250  
CACCTCCTTCTGTTTGGGGTCCCTGAGGGTA  
>MED12\_LsgRNA1251  
CACCTCCTTCTGTTTGGGGTCCCTGAGGGTA  
>MED12\_LsgRNA1252  
ACCCTCGAAGTGAGAGTGAGCGGGTGAAT  
>MED12\_LsgRNA1253  
ACCCTCGAAGTGAGAGTGAGCGGGTGAAT  
>MED12\_LsgRNA1254  
GAGATCGAGCAGCAGATCAAGGAGCGGGGA  
>MED12\_LsgRNA1255  
GAGATCGAGCAGCAGATCAAGGAGCGGGGA  
>MED12\_LsgRNA1256  
GGAGTCGAGGGTGTGCTGCTAGTTGGGGGC  
>MED12\_LsgRNA1257  
GGAGTCGAGGGTGTGCTGCTAGTTGGGGGC  
>MED12\_LsgRNA1258  
GGCGTCGTGAAGCATGGGATGAACCGGTCC  
>MED12\_LsgRNA1259  
GGCGTCGTGAAGCATGGGATGAACCGGTCC  
>MED12\_LsgRNA1260  
ATGGTCGTGTCTTCACAGTACTCTGGGGAA  
>MED12\_LsgRNA1261  
ATGGTCGTGTCTTCACAGTACTCTGGGGAA  
>MED12\_LsgRNA1262  
AGGCTCTAGCAGGGTAGGAGCAGGCGGCTC  
>MED12\_LsgRNA1263  
AGGCTCTAGCAGGGTAGGAGCAGGCGGCTC  
>MED12\_LsgRNA1264  
TCCTTCTCGACATCTGGCTTCTCAGGGGAT  
>MED12\_LsgRNA1265  
TCCTTCTCGACATCTGGCTTCTCAGGGGAT  
>MED12\_LsgRNA1266  
TGGGTCTGCTGAAGCCCCTGGCGCTGGAAC

>MED12\_LsgRNA1267  
TGGGTCTGCTGAAGCCCCTGGCGCTGGAAC  
>MED12\_LsgRNA1268  
GCCATCTGGTCCTGGTTGAGGATGAGGCAG  
>MED12\_LsgRNA1269  
GCCATCTGGTCCTGGTTGAGGATGAGGCAG  
>MED12\_LsgRNA1270  
TCCTTCTTACTGAAAATGGGGACCTGGATG  
>MED12\_LsgRNA1271  
CACCTCTTCCTTCTTACTGAAAATGGGGAC  
>MED12\_LsgRNA1272  
CACCTCTTCCTTCTTACTGAAAATGGGGAC  
>MED12\_LsgRNA1273  
CTCATCTTCTGGGGCAGTGGCAGTGGCTC  
>MED12\_LsgRNA1274  
CTCATCTTCTGGGGCAGTGGCAGTGGCTC  
>MED12\_LsgRNA1275  
CAAGTGAACCAGAAGGATAAATTCTGGCTG  
>MED12\_LsgRNA1276  
CAAGTGAACCAGAAGGATAAATTCTGGCTG  
>MED12\_LsgRNA1277  
ATCTTGAAGGTTCTGAACCGCAAAGGGACA  
>MED12\_LsgRNA1278  
ATCTTGAAGGTTCTGAACCGCAAAGGGACA  
>MED12\_LsgRNA1279  
GTTTTGAGAAGATCCGCCCTGGAGAGGATG  
>MED12\_LsgRNA1280  
GTTTTGAGAAGATCCGCCCTGGAGAGGATG  
>MED12\_LsgRNA1281  
CCCCTGAGAAGCCAGATGTTCGAGAAGGAGG  
>MED12\_LsgRNA1282  
CCCCTGAGAAGCCAGATGTTCGAGAAGGAGG  
>MED12\_LsgRNA1283  
TCAGTGAGCTCTTCACTACTGTGTTGGACA  
>MED12\_LsgRNA1284  
TCAGTGAGCTCTTCACTACTGTGTTGGACA  
>MED12\_LsgRNA1285  
GGATTGAGCTGCGGTGTCTTGAAAAGGTGA  
>MED12\_LsgRNA1286  
CAGCTGAGGCCAAAAACCAGGGCCGGTGC  
>MED12\_LsgRNA1287  
CAGCTGAGGCCAAAAACCAGGGCCGGTGC  
>MED12\_LsgRNA1288  
CTCGTGATCTGCTCCAGAACATTCGGGAG

>MED12\_LsgRNA1289  
CTCGTGATCTGCTCCAGAACATTCGGGAG  
>MED12\_LsgRNA1290  
AGTCTGCAAACCGTAGGAAGAGCTGGGAGT  
>MED12\_LsgRNA1291  
AGTCTGCAAACCGTAGGAAGAGCTGGGAGT  
>MED12\_LsgRNA1292  
TCTCTGCAATAATGCTGCTGAAGTTGGAAC  
>MED12\_LsgRNA1293  
TCTCTGCAATAATGCTGCTGAAGTTGGAAC  
>MED12\_LsgRNA1294  
ACTATGCAGCAATCTCTGAGACCAAGGTTA  
>MED12\_LsgRNA1295  
ACTATGCAGCAATCTCTGAGACCAAGGTTA  
>MED12\_LsgRNA1296  
CACCTGCAGGTAGTGGCTGGTTCTGGGTGT  
>MED12\_LsgRNA1297  
CACCTGCAGGTAGTGGCTGGTTCTGGGTGT  
>MED12\_LsgRNA1298  
ACATTGCAGGTCCGTGCAAAGTTGCGGGAG  
>MED12\_LsgRNA1299  
ACATTGCAGGTCCGTGCAAAGTTGCGGGAG  
>MED12\_LsgRNA1300  
CTTATGCATGAGGCACTCAAACCTGCGGCTC  
>MED12\_LsgRNA1301  
CTTATGCATGAGGCACTCAAACCTGCGGCTC  
>MED12\_LsgRNA1302  
GCCATGCCATCAAGAAAATCACCAAGGATA  
>MED12\_LsgRNA1303  
GCCATGCCATCAAGAAAATCACCAAGGATA  
>MED12\_LsgRNA1304  
GCAATGCCCTTATGCACGTCTGTGTGGGGC  
>MED12\_LsgRNA1305  
GCAATGCCCTTATGCACGTCTGTGTGGGGC  
>MED12\_LsgRNA1306  
ATCCTGCCGATGACCCAGAGCACCAAGGAGG  
>MED12\_LsgRNA1307  
ATCCTGCCGATGACCCAGAGCACCAAGGAGG  
>MED12\_LsgRNA1308  
ACAGTGCCGCTGATGATGATCTCCAGGAGG  
>MED12\_LsgRNA1309  
ACAGTGCCGCTGATGATGATCTCCAGGAGG  
>MED12\_LsgRNA1310  
ATCATGCCTGCCTCATCCTCAACCAGGACC

>MED12\_LsgRNA1311  
ATCATGCCTGCCTCATCCTCAACCAGGACC  
>MED12\_LsgRNA1312  
ACAGTGCCTGTGATGCGGGCTGCCTGGCTC  
>MED12\_LsgRNA1313  
ACAGTGCCTGTGATGCGGGCTGCCTGGCTC  
>MED12\_LsgRNA1314  
AGAATGCGCTTTATGCGCTGCCGCTGGGGG  
>MED12\_LsgRNA1315  
AGAATGCGCTTTATGCGCTGCCGCTGGGGG  
>MED12\_LsgRNA1316  
TGACTGCTCACACCATCCAGCTGCAGGGCC  
>MED12\_LsgRNA1317  
TGACTGCTCACACCATCCAGCTGCAGGGCC  
>MED12\_LsgRNA1318  
GCCATGCTCATCCCCAGAGACAGCAGGCTG  
>MED12\_LsgRNA1319  
GCCATGCTCATCCCCAGAGACAGCAGGCTG  
>MED12\_LsgRNA1320  
TTGCTGCTCTACCACACACACCTGAGGCC  
>MED12\_LsgRNA1321  
GACATGCTGAGCGTGCTCATCAATGGGACA  
>MED12\_LsgRNA1322  
GACATGCTGAGCGTGCTCATCAATGGGACA  
>MED12\_LsgRNA1323  
CTGTTGCTGCTGCTGCTGCTGCTCAGGTAG  
>MED12\_LsgRNA1324  
CTGTTGCTGCTGCTGCTGCTGCTCAGGTAG  
>MED12\_LsgRNA1325  
AGGCTGCTGGGGAAGAATTGGAGAAGGGTC  
>MED12\_LsgRNA1326  
AGGCTGCTGGGGAAGAATTGGAGAAGGGTC  
>MED12\_LsgRNA1327  
GGCCTGCTGGTGCACATAGCCACTGGGCCG  
>MED12\_LsgRNA1328  
GGCCTGCTGGTGCACATAGCCACTGGGCCG  
>MED12\_LsgRNA1329  
AAGCTGCTGTCTGTTGCTGCTGCTGGGTCT  
>MED12\_LsgRNA1330  
AAGCTGCTGTCTGTTGCTGCTGCTGGGTCT  
>MED12\_LsgRNA1331  
GACCTGCTTATGTGCCCTCAGCACCGGCC  
>MED12\_LsgRNA1332  
GACCTGCTTATGTGCCCTCAGCACCGGCC

>MED12\_LsgRNA1333  
TGCCTGGACGCCCTGGGCACTCATTGGAGT  
>MED12\_LsgRNA1334  
TGCCTGGACGCCCTGGGCACTCATTGGAGT  
>MED12\_LsgRNA1335  
AGGTTGGACGGGGCAATAGGCAAGTGGTCA  
>MED12\_LsgRNA1336  
AGGTTGGACGGGGCAATAGGCAAGTGGTCA  
>MED12\_LsgRNA1337  
CCATTGGACGGGTACTTCATACTTTGGAAG  
>MED12\_LsgRNA1338  
GGGATGGACTGCCCTTCCCCTCACAGGGCA  
>MED12\_LsgRNA1339  
GGGATGGACTGCCCTTCCCCTCACAGGGCA  
>MED12\_LsgRNA1340  
CCTATGGAGCCTTGCCTGTAGTTAAGGTGT  
>MED12\_LsgRNA1341  
CCTATGGAGCCTTGCCTGTAGTTAAGGTGT  
>MED12\_LsgRNA1342  
TCATTGGAGTCATGGTACTTATCATGGGTG  
>MED12\_LsgRNA1343  
TCATTGGAGTCATGGTACTTATCATGGGTG  
>MED12\_LsgRNA1344  
TGGCTGGCACTCACCTGCAGGTAGTGGCTG  
>MED12\_LsgRNA1345  
TGGCTGGCACTCACCTGCAGGTAGTGGCTG  
>MED12\_LsgRNA1346  
GCAGTGGCAGTGGCTCCAGGTAATAGGCGC  
>MED12\_LsgRNA1347  
GCAGTGGCAGTGGCTCCAGGTAATAGGCGC  
>MED12\_LsgRNA1348  
GAGGTGGCAGTGGTGGTTCGGAGGCAGGGTG  
>MED12\_LsgRNA1349  
GAGGTGGCAGTGGTGGTTCGGAGGCAGGGTG  
>MED12\_LsgRNA1350  
AGCATGGCCCACTCCGTGGTCTGCTGGGTG  
>MED12\_LsgRNA1351  
AGCATGGCCCACTCCGTGGTCTGCTGGGTG  
>MED12\_LsgRNA1352  
CTGTTGGCGAAGGCGCTGTCCTTGGGGCAC  
>MED12\_LsgRNA1353  
CTGTTGGCGAAGGCGCTGTCCTTGGGGCAC  
>MED12\_LsgRNA1354  
CCGATGGCTCCACGTTGCAGTAGATGGTGT

>MED12\_LsgRNA1355  
CCGATGGCTCCACGTTGCAGTAGATGGTGT  
>MED12\_LsgRNA1356  
GCAGTGGCTCCAGGTAATAGGCGCGGGGCC  
>MED12\_LsgRNA1357  
GCAGTGGCTCCAGGTAATAGGCGCGGGGCC  
>MED12\_LsgRNA1358  
AAGATGGCTGAATACTACCGGCCAGGGCCT  
>MED12\_LsgRNA1359  
AAGATGGCTGAATACTACCGGCCAGGGCCT  
>MED12\_LsgRNA1360  
GGGCTGGGACTGGGGCTGGGGTTGGGGAGG  
>MED12\_LsgRNA1361  
GGGCTGGGACTGGGGCTGGGGTTGGGGAGG  
>MED12\_LsgRNA1362  
GGGCTGGGCAAGATGGCGGCCTTCGGGATC  
>MED12\_LsgRNA1363  
GGGCTGGGCAAGATGGCGGCCTTCGGGATC  
>MED12\_LsgRNA1364  
GAGGTGGGCAGTTTAGCAATGAGGGGGGCC  
>MED12\_LsgRNA1365  
GAGGTGGGCAGTTTAGCAATGAGGGGGGCC  
>MED12\_LsgRNA1366  
CCACTGGGCCGCTGTTGCAGGTGGCGGGTA  
>MED12\_LsgRNA1367  
CCACTGGGCCGCTGTTGCAGGTGGCGGGTA  
>MED12\_LsgRNA1368  
TGTGTGGGGCACCATGATCCCGATAGGTAT  
>MED12\_LsgRNA1369  
TGTGTGGGGCACCATGATCCCGATAGGTAT  
>MED12\_LsgRNA1370  
ATCATGGGTGTCTGCTGCAGTGTCTGGTGT  
>MED12\_LsgRNA1371  
ATCATGGGTGTCTGCTGCAGTGTCTGGTGT  
>MED12\_LsgRNA1372  
GGATTGGTAGAAGGGTGGGTGCTCTGGTAA  
>MED12\_LsgRNA1373  
GGATTGGTAGAAGGGTGGGTGCTCTGGTAA  
>MED12\_LsgRNA1374  
TCGCTGGTGCTAACATGTCTGAAAGGGCAG  
>MED12\_LsgRNA1375  
TCGCTGGTGCTAACATGTCTGAAAGGGCAG  
>MED12\_LsgRNA1376  
GCTGTGGTGTCAATTGCTATGTGAATGGGCT

>MED12\_LsgRNA1377  
GCTGTGGTGTTCATTGCTATGTGAATGGGCT  
>MED12\_LsgRNA1378  
GTCATGGTTGTGGGCAGCACTCCAGGGTAA  
>MED12\_LsgRNA1379  
GTCATGGTTGTGGGCAGCACTCCAGGGTAA  
>MED12\_LsgRNA1380  
CCTTTGTAACCGAATCTTTGGATTGGGACC  
>MED12\_LsgRNA1381  
CCTTTGTAACCGAATCTTTGGATTGGGACC  
>MED12\_LsgRNA1382  
ACGTTGTAATACCCTTCCTGACACTGGTTCG  
>MED12\_LsgRNA1383  
ACGTTGTAATACCCTTCCTGACACTGGTTCG  
>MED12\_LsgRNA1384  
GAGATGTCATCACGTGTGAGCCACAGGGCT  
>MED12\_LsgRNA1385  
GAGATGTCATCACGTGTGAGCCACAGGGCT  
>MED12\_LsgRNA1386  
TTGCTGTCCTCACACAGAGACTTAAGGCAA  
>MED12\_LsgRNA1387  
TTGCTGTCCTCACACAGAGACTTAAGGCAA  
>MED12\_LsgRNA1388  
TTCCTGTGCCTGCAGAAGGAGTTGGGGGAG  
>MED12\_LsgRNA1389  
TTCCTGTGCCTGCAGAAGGAGTTGGGGGAG  
>MED12\_LsgRNA1390  
AGGCTGTGTGGCGTCGTGAAGCATGGGATG  
>MED12\_LsgRNA1391  
AGGCTGTGTGGCGTCGTGAAGCATGGGATG  
>MED12\_LsgRNA1392  
AAGGTGTGTTATAGAACCAGGGTTTGGGTG  
>MED12\_LsgRNA1393  
AAGGTGTGTTATAGAACCAGGGTTTGGGTG  
>MED12\_LsgRNA1394  
GCACTGTTACCCTCTGGCATGGGCAGGTTG  
>MED12\_LsgRNA1395  
GCACTGTTACCCTCTGGCATGGGCAGGTTG  
>MED12\_LsgRNA1396  
GACATGTTAGCACCAGCGATAAGAAGGGCT  
>MED12\_LsgRNA1397  
GACATGTTAGCACCAGCGATAAGAAGGGCT  
>MED12\_LsgRNA1398  
ATCTTGTGCCCCTTGGTATCGATAAGGGAG



>MED12\_LsgRNA1399  
ATCTTGTGCCCTTGGTATCGATAAGGGAG  
>MED12\_LsgRNA1400  
AATATGTTGGTACTGGGCTGTGGCTGGGTA  
>MED12\_LsgRNA1401  
AATATGTTGGTACTGGGCTGTGGCTGGGTA  
>MED12\_LsgRNA1402  
CAGTTTAAGCAATTCATCCTCTCCAGGGCG  
>MED12\_LsgRNA1403  
CAGTTTAAGCAATTCATCCTCTCCAGGGCG  
>MED12\_LsgRNA1404  
GTAGTTAAGGTGTGTTATAGAACCAGGGTT  
>MED12\_LsgRNA1405  
GTAGTTAAGGTGTGTTATAGAACCAGGGTT  
>MED12\_LsgRNA1406  
CTGCTTACCTGCAACTTCTTCGCCAGGTTC  
>MED12\_LsgRNA1407  
CTGCTTACCTGCAACTTCTTCGCCAGGTTC  
>MED12\_LsgRNA1408  
TCACTTACTTCCATCAGACTGGCAAGGATT  
>MED12\_LsgRNA1409  
TCACTTACTTCCATCAGACTGGCAAGGATT  
>MED12\_LsgRNA1410  
CCCTTTAGCAGAGTCAGGGCATGTTGGGAC  
>MED12\_LsgRNA1411  
TGTGTTATAGAACCAGGGTTTGGGTGGTGC  
>MED12\_LsgRNA1412  
TGTGTTATAGAACCAGGGTTTGGGTGGTGC  
>MED12\_LsgRNA1413  
GAAGTTATCCTTCTGGTTCACTTGGGGCTT  
>MED12\_LsgRNA1414  
GAAGTTATCCTTCTGGTTCACTTGGGGCTT  
>MED12\_LsgRNA1415  
GCCCTTATGGTGTGACAGTGCCTCCGGACC  
>MED12\_LsgRNA1416  
GCCCTTATGGTGTGACAGTGCCTCCGGACC  
>MED12\_LsgRNA1417  
TCCCTTCAATCTTCTCCTTGGGTGGGGGCT  
>MED12\_LsgRNA1418  
TCCCTTCAATCTTCTCCTTGGGTGGGGGCT  
>MED12\_LsgRNA1419  
GGGCTTACCTCCTTCTCGACATCTGGCTT  
>MED12\_LsgRNA1420  
GGGCTTACCTCCTTCTCGACATCTGGCTT

>MED12\_LsgRNA1421  
CTATTTCCACCCAGTTCCAGCGCCAGGGGC  
>MED12\_LsgRNA1422  
CTATTTCCACCCAGTTCCAGCGCCAGGGGC  
>MED12\_LsgRNA1423  
GCCCTTCCCCTCACAGGGCATAGTAGGGGA  
>MED12\_LsgRNA1424  
GCCCTTCCCCTCACAGGGCATAGTAGGGGA  
>MED12\_LsgRNA1425  
CGGATTCCTACTGTAGGCTTGTCTGGGGAA  
>MED12\_LsgRNA1426  
CGGATTCCTACTGTAGGCTTGTCTGGGGAA  
>MED12\_LsgRNA1427  
GGTGTTCGTAGCTCAAGATCCCGAAGGCCG  
>MED12\_LsgRNA1428  
GGTGTTCGTAGCTCAAGATCCCGAAGGCCG  
>MED12\_LsgRNA1429  
TATGTTCTATGCCCTCAGGATCCAGGGCTC  
>MED12\_LsgRNA1430  
TATGTTCTATGCCCTCAGGATCCAGGGCTC  
>MED12\_LsgRNA1431  
CTTTTTCTCAGGCTCTAGCAGGGTAGGAGC  
>MED12\_LsgRNA1432  
CTTTTTCTCAGGCTCTAGCAGGGTAGGAGC  
>MED12\_LsgRNA1433  
TCTTTTCTCCCTTTAGCAGAGTCAGGGCAT  
>MED12\_LsgRNA1434  
TCTTTTCTCCCTTTAGCAGAGTCAGGGCAT  
>MED12\_LsgRNA1435  
CTCCTTCTCGACATCTGGCTTCTCAGGGGA  
>MED12\_LsgRNA1436  
CTCCTTCTCGACATCTGGCTTCTCAGGGGA  
>MED12\_LsgRNA1437  
CAGCTTCTGCATTGGTAAGCGCACAGGACG  
>MED12\_LsgRNA1438  
CAGCTTCTGCATTGGTAAGCGCACAGGACG  
>MED12\_LsgRNA1439  
CTTCTTCTTGCCTCCTCAGTACTGGGTGG  
>MED12\_LsgRNA1440  
CTTCTTCTTGCCTCCTCAGTACTGGGTGG  
>MED12\_LsgRNA1441  
TATCTTGAAGGTTCTGAACCGCAAAGGGAC  
>MED12\_LsgRNA1442  
TATCTTGAAGGTTCTGAACCGCAAAGGGAC

>MED12\_LsgRNA1443  
ATCTTTGCCTGGAGCTGTTGGCGAAGGCGC  
>MED12\_LsgRNA1444  
ATCTTTGCCTGGAGCTGTTGGCGAAGGCGC  
>MED12\_LsgRNA1445  
AACGTTGCCTTAAGTCTCTGTGTGAGGACA  
>MED12\_LsgRNA1446  
AACGTTGCCTTAAGTCTCTGTGTGAGGACA  
>MED12\_LsgRNA1447  
CTTCTTGCGTTCCTCAGTACTGGGTGGAGC  
>MED12\_LsgRNA1448  
CTTCTTGCGTTCCTCAGTACTGGGTGGAGC  
>MED12\_LsgRNA1449  
TCATTTGCTATCCACATCGACTGCTGGACA  
>MED12\_LsgRNA1450  
TCATTTGCTATCCACATCGACTGCTGGACA  
>MED12\_LsgRNA1451  
CAGGTTGCTGCTGCCGGTACACAGAGGTCT  
>MED12\_LsgRNA1452  
CAGGTTGCTGCTGCCGGTACACAGAGGTCT  
>MED12\_LsgRNA1453  
TGGTTTGGAACAGTCCGAGTGGACCGGCGA  
>MED12\_LsgRNA1454  
TGGTTTGGAACAGTCCGAGTGGACCGGCGA  
>MED12\_LsgRNA1455  
AGAATTGGAGAAGGGTCAGCACCTGGGTTC  
>MED12\_LsgRNA1456  
AGAATTGGAGAAGGGTCAGCACCTGGGTTC  
>MED12\_LsgRNA1457  
GCTGTTGGCGAAGGCGCTGTCCCTTGGGGCA  
>MED12\_LsgRNA1458  
GCTGTTGGCGAAGGCGCTGTCCCTTGGGGCA  
>MED12\_LsgRNA1459  
CAGATTGGTAGTTCACCAGCATTAAAGGAGT  
>MED12\_LsgRNA1460  
CAGATTGGTAGTTCACCAGCATTAAAGGAGT  
>MED12\_LsgRNA1461  
GCGGTTGGTCGTACTIONGTTTGGGGTGGGAAA  
>MED12\_LsgRNA1462  
GCGGTTGGTCGTACTIONGTTTGGGGTGGGAAA  
>MED12\_LsgRNA1463  
CTGATTGTCAGCTTCCTCAGGAATGGGTAG  
>MED12\_LsgRNA1464  
CTGATTGTCAGCTTCCTCAGGAATGGGTAG

>MED12\_LsgRNA1465  
 CTCCTTGTGCTCTGGGTCATCGGCAGGATC  
 >MED12\_LsgRNA1466  
 CTCCTTGTGCTCTGGGTCATCGGCAGGATC  
 >MED12\_LsgRNA1467  
 GGCCTTGTGCTGCTCCTCTAACAATGGCAC  
 >MED12\_LsgRNA1468  
 GGCCTTGTGCTGCTCCTCTAACAATGGCAC  
 >MED12\_LsgRNA1469  
 CTTGTTGTGGCCCTGGCAGGTGGGGGGCAT  
 >MED12\_LsgRNA1470  
 CTTGTTGTGGCCCTGGCAGGTGGGGGGCAT  
 >MED12\_LsgRNA1471  
 CATGTTTCTATCCGACCTGAGCACAGGCTT  
 >MED12\_LsgRNA1472  
 CATGTTTCTATCCGACCTGAGCACAGGCTT  
 >MED12\_LsgRNA1473  
 CTCTTTTCTCCCTTTAGCAGAGTCAGGGCA  
 >MED12\_LsgRNA1474  
 CTCTTTTCTCCCTTTAGCAGAGTCAGGGCA  
 >MED12\_LsgRNA1475  
 AGGGTTTGGGTGGTGCAGGAGGTCCGGAGG  
 >MED12\_LsgRNA1476  
 AGGGTTTGGGTGGTGCAGGAGGTCCGGAGG  
 >MED12\_LsgRNA1477  
 CAAATTTGTTCTTTAAATGGCTACAGGAGG  
 >MED12\_LsgRNA1478  
 CAAATTTGTTCTTTAAATGGCTACAGGAGG

(23)  $S_6^-$ : 152 low on-target activity sgRNAs targeting TADA2B

>TADA2B\_LsgRNA1  
 AACAAAAACCTAGCCGGCTCCAAACGGGGA  
 >TADA2B\_LsgRNA2  
 ACAAAAACCTAGCCGGCTCCAAACGGGGAA  
 >TADA2B\_LsgRNA3  
 CAAAAACCTAGCCGGCTCCAAACGGGGAAA  
 >TADA2B\_LsgRNA4  
 CCAAAAAGCCGCCTTCCTAGCTACCTGGACA  
 >TADA2B\_LsgRNA5  
 GAGGAAGGAGAACAAAAACCTAGCCGGCTC  
 >TADA2B\_LsgRNA6  
 CTACAATCTGGTGCCAGCCTTCCTGGGGAA  
 >TADA2B\_LsgRNA7  
 TCTGACAGGAGCTCGAAGCCTGGAAGGTTTC

>TADA2B\_LsgRNA8  
GAGTACGAGGCAGCGCGGCATAAACGGGAG  
>TADA2B\_LsgRNA9  
TGTCACGCGGTTGGGGATGGTGTCTGGGGAT  
>TADA2B\_LsgRNA10  
GTGGACGGCGGGCGCTTACGCTCTGGGGG  
>TADA2B\_LsgRNA11  
TCAAACCTCCTTGCATGACATGAACTGGTAC  
>TADA2B\_LsgRNA12  
TCACAGAAAGCGGCTGGATCTCCAGGGACG  
>TADA2B\_LsgRNA13  
ACAGAGATGTCCAGCGGGGCAGCGGGGTG  
>TADA2B\_LsgRNA14  
ATCGAGCAGTTCGGCTTCGAAACTGGGTG  
>TADA2B\_LsgRNA15  
ACCTAGCCGGCTCCAAACGGGGAAAGGAGG  
>TADA2B\_LsgRNA16  
TGGTAGCCGTGGTAGCGGCGGTGGTGGCCG  
>TADA2B\_LsgRNA17  
GTGAAGCGCCCGCCGTCCACCAGCTGGTAG  
>TADA2B\_LsgRNA18  
CAGCAGCTGGGCTACATGCCGCTGCGGGAT  
>TADA2B\_LsgRNA19  
CTTTAGGACTTTGTCCAGGTAGCTAGGAAG  
>TADA2B\_LsgRNA20  
GAGAAGGAGCTGCGCCTGAAGCTGAGGCCG  
>TADA2B\_LsgRNA21  
ATGCAGGCCTTCCCCAGGTTCCCGTGGATG  
>TADA2B\_LsgRNA22  
TTGGAGGGGATTCTTGCCGCTTCTGGAGG  
>TADA2B\_LsgRNA23  
CTCGATCTCGTAATCATCCCCGAGCGGCAT  
>TADA2B\_LsgRNA24  
TACAATCTGGTGCCAGCCTTCTGGGGAAG  
>TADA2B\_LsgRNA25  
GAGCATGTACATCCACGGGAACCTGGGGAA  
>TADA2B\_LsgRNA26  
TTGAATTTCTCACAGAAAGCGGCTGGATC  
>TADA2B\_LsgRNA27  
CTGTCAACTATGATGACGACGACGTGGAGA  
>TADA2B\_LsgRNA28  
AGCGCAAGATCACCAAGGAGGAGAAGGAGC  
>TADA2B\_LsgRNA29  
ACTACAATCTGGTGCCAGCCTTCTGGGGA

>TADA2B\_LsgRNA30  
GCCTCACCACCCCGCTGCCCCGCTGGACA  
>TADA2B\_LsgRNA31  
CTGTCACGCGGTTGGGGATGGTGTCTGGGGA  
>TADA2B\_LsgRNA32  
CTACCACGGCTACCAGCTGGTGGACGGCGG  
>TADA2B\_LsgRNA33  
CTCACAGAAAGCGGCTGGATCTCCAGGGAC  
>TADA2B\_LsgRNA34  
CCAGCAGCAGCTGCTCCTCGCGACTGGTCC  
>TADA2B\_LsgRNA35  
GGCACAGCTCGATGTCCTGGCACTCGGTGC  
>TADA2B\_LsgRNA36  
GCTCCATCACCTCTTGGGGAGTCCGGGAAG  
>TADA2B\_LsgRNA37  
TGTACATCCACGGGAACCTGGGGAAGGCCT  
>TADA2B\_LsgRNA38  
AGAACATCGCCCGTACTACAATCTGGTGC  
>TADA2B\_LsgRNA39  
TGAGCATGTACATCCACGGGAACCTGGGGA  
>TADA2B\_LsgRNA40  
TCCACCAGCTGGTAGCCGTGGTAGCGGCGG  
>TADA2B\_LsgRNA41  
TGCTCCATCACCTCTTGGGGAGTCCGGGAA  
>TADA2B\_LsgRNA42  
ACCGCCGCTACCACGGCTACCAGCTGGTGG  
>TADA2B\_LsgRNA43  
GGTACCGCTGCAGTTCTCGGATCTTGGCCC  
>TADA2B\_LsgRNA44  
CTTCCCGACTCCCCAAGAGGTGATGGAGC  
>TADA2B\_LsgRNA45  
AGATCGAGCTGAAGCGCGCCACGTGGACA  
>TADA2B\_LsgRNA46  
AGTACGAGGCAGCGCGGCATAAACGGGAGA  
>TADA2B\_LsgRNA47  
TCGGCGCCGGCCGAGAAGCACTCGGGGCAC  
>TADA2B\_LsgRNA48  
GCAGCGCGGCATAAACGGGAGAAGAGGAAG  
>TADA2B\_LsgRNA49  
GTCACGCGGTTGGGGATGGTGTCTGGGGATG  
>TADA2B\_LsgRNA50  
GAGTCGGCAGAGTACGAGGCAGCGCGGCAT  
>TADA2B\_LsgRNA51  
TGGACGCGGGCGCTTACGCTCTGGGGGC

>TADA2B\_LsgRNA52  
TAGCCGGCTCCAAACGGGGAAAGGAGGACG  
>TADA2B\_LsgRNA53  
GTGTCTGGGGATGCAGGCCTTCCCCAGGTTC  
>TADA2B\_LsgRNA54  
CACTCGGGGCACAGCTCGATGTCTTGGCAC  
>TADA2B\_LsgRNA55  
CGAGCGGGGAAGATGGCGGAGCTGGGGAA  
>TADA2B\_LsgRNA56  
CACTCGGTGCAGCGGAAGCGCAGCGGGCTC  
>TADA2B\_LsgRNA57  
CTCACGTAATGCTCCATCACCTCTTGGGGA  
>TADA2B\_LsgRNA58  
CCGCCGTCCACCAGCTGGTAGCCGTGGTAG  
>TADA2B\_LsgRNA59  
GCCGCTACCACGGCTACCAGCTGGTGGACG  
>TADA2B\_LsgRNA60  
CGTCTCCTTTCCCCGTTTGGAGCCGGCTA  
>TADA2B\_LsgRNA61  
CGTACTCTGCCGACTCTTCCATCTTGGTGA  
>TADA2B\_LsgRNA62  
CACGCTCTGGGGGCCCGAGGCCGAGGGCGG  
>TADA2B\_LsgRNA63  
AGAAGTGCAGCGGTACCGCGAAACGGGAT  
>TADA2B\_LsgRNA64  
ATGGCTGCCCACGTTGGTGCTTCCCGGACT  
>TADA2B\_LsgRNA65  
AAGGCTGGCACCAGATTGTAGTCACGGGCG  
>TADA2B\_LsgRNA66  
TGCGCTTCCGCTGCACCGAGTGCCAGGACA  
>TADA2B\_LsgRNA67  
CAGCCTTCTTGGGAAGGACAAGAAGGAGA  
>TADA2B\_LsgRNA68  
TCTCCTTCTTGTCTTCCCCAGGAAGGCTG  
>TADA2B\_LsgRNA69  
AGGACTTTGTCCAGGTAGCTAGGAAGGCGG  
>TADA2B\_LsgRNA70  
GTAGGAAGATATGGCTGCCACGTTGGTGC  
>TADA2B\_LsgRNA71  
GCTCGAAGCCTGGAAGGTTCTCAATGGCGG  
>TADA2B\_LsgRNA72  
CGCTGAAGCGCAAGATCACCAAGGAGGAGA  
>TADA2B\_LsgRNA73  
GGAAGAAGTACTGCGTGTACTGCCTGGCCG

>TADA2B\_LsgRNA74  
GACAGACCACACCTGTCCCAGCGGAGGCC  
>TADA2B\_LsgRNA75  
TAAAGACCACCTCCAGAAGCGGCAAGGAAT  
>TADA2B\_LsgRNA76  
CACAGAGATGTCCAGCGGGGCAGCGGGGT  
>TADA2B\_LsgRNA77  
GTGAGAGGGGGCCTCCGCTGGGACAGGTGT  
>TADA2B\_LsgRNA78  
TGGGGAGTCCGGGAAGCACCAACGTGGGCA  
>TADA2B\_LsgRNA79  
ACGGGATCACCAAGATGGAAGAGTCGGCAG  
>TADA2B\_LsgRNA80  
CAGAGATGTCCAGCGGGGCAGCGGGTGG  
>TADA2B\_LsgRNA81  
ACATGCACAAAGAAAAAATGCTCCGGGCCA  
>TADA2B\_LsgRNA82  
CGCGGCATAAACGGGAGAAGAGGAAGGAGA  
>TADA2B\_LsgRNA83  
GGACGCCATCGAGCAGTTCGGCTTCGGAAA  
>TADA2B\_LsgRNA84  
CGCTGCCCCGCTGGACATCTCTGTGGCTG  
>TADA2B\_LsgRNA85  
GTTTCGCCCATTTGAGAACCTTCCAGGCTT  
>TADA2B\_LsgRNA86  
CTTTGCCGTCTCCTTTCCCCGTTTGGAGC  
>TADA2B\_LsgRNA87  
CGAAGCCTGGAAGGTTCTCAATGGCGGCGA  
>TADA2B\_LsgRNA88  
ACCGGCGAAACGGGATCACCAAGATGGAAG  
>TADA2B\_LsgRNA89  
CCTCGCGACTGGTCCAGCCGCCCTCGGCCT  
>TADA2B\_LsgRNA90  
TCAGGCGCAGCTCCTTCTCCTCCTTGGTGA  
>TADA2B\_LsgRNA91  
CTCGGCGCCGGCCGAGAAGCACTCGGGGCA  
>TADA2B\_LsgRNA92  
GACGGCGGGCGCTTCACGCTCTGGGGGCC  
>TADA2B\_LsgRNA93  
GCGAGCGGGGAAGATGGCGGAGCTGGGGA  
>TADA2B\_LsgRNA94  
TCCAGCGGGGCAGCGGGGTGGTGAGGCTG  
>TADA2B\_LsgRNA95  
TCGAGCTCCTGTCAGATCGCGAGAAGGTGC



>TADA2B\_LsgRNA96  
TCACGCTCTGGGGGCCCGAGGCCGAGGGCG  
>TADA2B\_LsgRNA97  
AGGCGCTGAAGCGCAAGATCACCAAGGAGG  
>TADA2B\_LsgRNA98  
AGCAGCTGGGCTACATGCCGCTGCGGGATG  
>TADA2B\_LsgRNA99  
ACCAGCTGGTAGCCGTGGTAGCGGCGGTGG  
>TADA2B\_LsgRNA100  
TCGAGCTGTGCCCCGAGTGCTTCTCGGCCG  
>TADA2B\_LsgRNA101  
AGATGGAAGAGTCGGCAGAGTACGAGGCAG  
>TADA2B\_LsgRNA102  
GGAAGGACAAGAAGGAGAAGGAAAAGGCCG  
>TADA2B\_LsgRNA103  
GAGGGGATTCCTTGCCGCTTCTGGAGGTGG  
>TADA2B\_LsgRNA104  
GATCGGCCACCACCGCCGCTACCACGGCTA  
>TADA2B\_LsgRNA105  
TGGGGGCCCGAGGCCGAGGGCGGCTGGACC  
>TADA2B\_LsgRNA106  
AGGGGGCCTCCGCTGGGACAGGTGTGGTCT  
>TADA2B\_LsgRNA107  
TCTCGGCGCCGGCCGAGAAGCACTCGGGGC  
>TADA2B\_LsgRNA108  
GGACGGCGGGCGCTTACGCTCTGGGGGCC  
>TADA2B\_LsgRNA109  
CCACGGCTACCAGCTGGTGGACGGCGGGCG  
>TADA2B\_LsgRNA110  
GCGGGGGCAGCGGGGTGGTGAGGCTGGGTG  
>TADA2B\_LsgRNA111  
CCGAGGGCGGCTGGACCAGTCGCGAGGAGC  
>TADA2B\_LsgRNA112  
GGTTGGGGATGGTGTGCGGGATGCAGGCCT  
>TADA2B\_LsgRNA113  
GAGCGGGGAAGATGGCGGAGCTGGGGAAG  
>TADA2B\_LsgRNA114  
GGCTGGGTGAGAGGGGGCCTCCGCTGGGAC  
>TADA2B\_LsgRNA115  
AGCGGGGTGGTGAGGCTGGGTGAGAGGGGG  
>TADA2B\_LsgRNA116  
AACTGGTACAGCGGCCTCAGCTTCAGGCCG  
>TADA2B\_LsgRNA117  
AGCTGGTAGCCGTGGTAGCGGCGGTGGTGG

>TADA2B\_LsgRNA118  
GACTGGTCCAGCCGCCCTCGGCCTCGGGCC  
>TADA2B\_LsgRNA119  
GCTGGGTGAGAGGGGGCCTCCGCTGGGACA  
>TADA2B\_LsgRNA120  
ATCTGGTGCCAGCCTTCCTGGGGAAGGACA  
>TADA2B\_LsgRNA121  
GCGGGGTGGTGGGCTGGGTGAGAGGGGGC  
>TADA2B\_LsgRNA122  
GACAGGTGTGGTCTGTACGCGGTTGGGGA  
>TADA2B\_LsgRNA123  
TCACGTAATGCTCCATCACCTCTTGGGGAG  
>TADA2B\_LsgRNA124  
CCAGGTAGCTAGGAAGGCGGCTTTTGGAGG  
>TADA2B\_LsgRNA125  
ACTGGTCCAGCCGCCCTCGGCCTCGGGCCC  
>TADA2B\_LsgRNA126  
TGTGGTCTGTACGCGGTTGGGGATGGTGT  
>TADA2B\_LsgRNA127  
CGGGGTGGTGGGCTGGGTGAGAGGGGGCC  
>TADA2B\_LsgRNA128  
GGCGGTGGTGGCCGATCTCGGCGCCGGCCG  
>TADA2B\_LsgRNA129  
ACAGGTGTGGTCTGTACGCGGTTGGGGAT  
>TADA2B\_LsgRNA130  
ATAATAGTCTTCACAGTCACGTAGCGGGCT  
>TADA2B\_LsgRNA131  
CTGCTCAGCCACAGAGATGTCCAGCGGGGG  
>TADA2B\_LsgRNA132  
CGTCTCAGCTTCAAGACGCGTCCCTGGAGA  
>TADA2B\_LsgRNA133  
CGGCTCCAAACGGGGAAAGGAGGACGGCAA  
>TADA2B\_LsgRNA134  
AAGATCCGAGAACTGCAGCGGTACCGGCGA  
>TADA2B\_LsgRNA135  
CCAGTCGCGAGGAGCAGCTGCTGCTGGACG  
>TADA2B\_LsgRNA136  
GCGATCTGACAGGAGCTCGAAGCCTGGAAG  
>TADA2B\_LsgRNA137  
TCCATCTTGGTGATCCCGTTTCGCCGGTAC  
>TADA2B\_LsgRNA138  
AACATGCACAAAGAAAAAATGCTCCGGGCC  
>TADA2B\_LsgRNA139  
GAACTGCAGCGGTACCGGCGAAACGGGATC

>TADA2B\_LsgRNA140  
 GCTGTGCCCCGAGTGCTTCTCGGCCGGCGC  
 >TADA2B\_LsgRNA141  
 TACCTGGACAAAGTCCTAAAGAAAAGGATT  
 >TADA2B\_LsgRNA142  
 GCTCTGGGGGCCCGAGGCCGAGGGCGGCTG  
 >TADA2B\_LsgRNA143  
 ACTTTGTCCAGGTAGCTAGGAAGGCGGCTT  
 >TADA2B\_LsgRNA144  
 TCTCTGTGGCTGAGCAGCAGCAGCTGGGCT  
 >TADA2B\_LsgRNA145  
 CAGGTGTGGTCTGTCCACGCGGTTGGGGATG  
 >TADA2B\_LsgRNA146  
 ATAATTAAAGACCACCTCCAGAAGCGGCAA  
 >TADA2B\_LsgRNA147  
 ATGATTACGAGATCGAGTATGACCAGGATG  
 >TADA2B\_LsgRNA148  
 TCCTTTCCCCGTTTGGAGCCGGCTAGGTTT  
 >TADA2B\_LsgRNA149  
 GGGATTCCTTGCCGCTTCTGGAGGTGGTCT  
 >TADA2B\_LsgRNA150  
 GTGCTTCTCGGCCGGCGCCGAGATCGGCCA  
 >TADA2B\_LsgRNA151  
 GATTTTGAATTTCTCACAGAAAGCGGCTG  
 >TADA2B\_LsgRNA152  
 CTTCTTGTCTTCCCCAGGAAGGCTGGCAC

(24) S<sub>7</sub>: 87 low on-target activity sgRNAs targeting TADA1

>TADA1\_LsgRNA1  
 TTCAAAAAGATCGTACATGTTACCCGGAGG  
 >TADA1\_LsgRNA2  
 AAGGAAAGCTTATCGGTTACGAGATGGTCA  
 >TADA1\_LsgRNA3  
 ATTGAAAGGATCATCACGAAACTCTGGCAT  
 >TADA1\_LsgRNA4  
 TTGTAAGCTACTACACTATTCTTCAGGTAT  
 >TADA1\_LsgRNA5  
 CACAAATTGCTGGGCTCCTGAGAGAGGATT  
 >TADA1\_LsgRNA6  
 CCACACAATGATGCTTCCCCTCGAGGCCA  
 >TADA1\_LsgRNA7  
 AGCTACTACACTATTCTTCAGGTATGGCTG  
 >TADA1\_LsgRNA8  
 TCATAGACTTCTCACACAGGATAATGGTAA

>TADA1\_LsgRNA9  
AAAAAGATCGTACATGTTACCCGAGGCAA  
>TADA1\_LsgRNA10  
GCAAAGATGCAGGTAGAGTGTCTCCGGAGC  
>TADA1\_LsgRNA11  
CCGCAGCAAAACCTGGAAAACCCAAGGGAA  
>TADA1\_LsgRNA12  
CAGGAGCCCAGCAATTTGTGGCAAAGGATC  
>TADA1\_LsgRNA13  
CGCCAGCGCTTGGCAGCCAAGGAGGGGCTT  
>TADA1\_LsgRNA14  
TTGAAGCTCATAGACTTCTCACACAGGATA  
>TADA1\_LsgRNA15  
GAGAAGCTGGATTCTGACCAGCACAGGGAG  
>TADA1\_LsgRNA16  
GCACAGGGAGCAGTAAAAGCTGGAGGGCTG  
>TADA1\_LsgRNA17  
CTCGAGTGGGAAGCATCATTGTGTGGGAAC  
>TADA1\_LsgRNA18  
GGGGATCCTTTGCCACAAATTGCTGGGCTC  
>TADA1\_LsgRNA19  
CTAGATGGTGCTGGATCTTTGCCTTGGCCA  
>TADA1\_LsgRNA20  
CACTATTCTTCAGGTATGGCTGCGGGGTCA  
>TADA1\_LsgRNA21  
AAGACAAAGTTCACCGCCAGCGCTTGGCAG  
>TADA1\_LsgRNA22  
ATTCCAGCCTCAAATCCTCTCTCAGGAGC  
>TADA1\_LsgRNA23  
CCGCCAGCGCTTGGCAGCCAAGGAGGGGCT  
>TADA1\_LsgRNA24  
AGCACAGGGAGCAGTAAAAGCTGGAGGGCT  
>TADA1\_LsgRNA25  
CTTCCCACTCGAGGCCAGCTTGAAGGGAGA  
>TADA1\_LsgRNA26  
ACCGCCAGCGCTTGGCAGCCAAGGAGGGGC  
>TADA1\_LsgRNA27  
GCTTCCCACTCGAGGCCAGCTTGAAGGGAG  
>TADA1\_LsgRNA28  
CACCCCCTGATGATGCTGAGCAGCAGGCTG  
>TADA1\_LsgRNA29  
TTCTCCCTTCAAGCTGGCCTCGAGTGGGAA  
>TADA1\_LsgRNA30  
TTCACCGCCAGCGCTTGGCAGCCAAGGAGG

>TADA1\_LsgRNA31  
AGCCCCCTCCTTGGCTGCCAAGCGCTGGCGG  
>TADA1\_LsgRNA32  
GCAGCCTGCTGCTCAGCATCATCAGGGGGT  
>TADA1\_LsgRNA33  
TCTCCCTTCAAGCTGGCCTCGAGTGGGAAG  
>TADA1\_LsgRNA34  
CCCTCCTTGGCTGCCAAGCGCTGGCGGTGA  
>TADA1\_LsgRNA35  
TGGCCGCTCCAGCTCGCTCACAAAGGTCG  
>TADA1\_LsgRNA36  
GCTGCGGGGTCACGTTACTGCCAAAGGCAT  
>TADA1\_LsgRNA37  
GTCACTATCATTTCTCCCTTCAAGCTGGCCT  
>TADA1\_LsgRNA38  
TACACTATTCTTCAGGTATGGCTGCGGGGT  
>TADA1\_LsgRNA39  
CTCTCTCAGGAGCCAGCAATTTGTGGCAA  
>TADA1\_LsgRNA40  
ACAACCTGACGTCAGTATATCTTTAAGGTGA  
>TADA1\_LsgRNA41  
CAGCCTGCTGCTCAGCATCATCAGGGGGTG  
>TADA1\_LsgRNA42  
GGTGCTGGATCTTTGCCTTGGCCAGGGGGT  
>TADA1\_LsgRNA43  
GTAGCTTACAACAACCTTAATAGAAAGGTAA  
>TADA1\_LsgRNA44  
CGACCTTTGTGAGCGAGCTGGAGGCGGCCA  
>TADA1\_LsgRNA45  
ATCTGACAACGCGTGAGAATGGCCAGGAGG  
>TADA1\_LsgRNA46  
TGGCGACCTTTGTGAGCGAGCTGGAGGCGG  
>TADA1\_LsgRNA47  
TAGTGACTGCTTATGAGCATGGGCTGGACA  
>TADA1\_LsgRNA48  
TTAAGAGCATAGACAGTATGTGTAGGGATG  
>TADA1\_LsgRNA49  
TGGGGATCCTTTGCCACAAATTGCTGGGCT  
>TADA1\_LsgRNA50  
CGCAGCAAACCTTGAAAACCCAAGGGAAA  
>TADA1\_LsgRNA51  
CAAGGCAAAGATCCAGCACCATCTAGGAGA  
>TADA1\_LsgRNA52  
TTTAGCACAGCAAAGCCCTCCTTGGCTG

>TADA1\_LsgRNA53  
ACCAGCACAGGGAGCAGTAAAAGCTGGAGG  
>TADA1\_LsgRNA54  
GGCTGCACTCCTGCTGGCATGCTCCGGAGA  
>TADA1\_LsgRNA55  
CTGAGCAGCAGGCTGCACTCCTGCTGGCAT  
>TADA1\_LsgRNA56  
TGCAGCCTGCTGCTCAGCATCATCAGGGGG  
>TADA1\_LsgRNA57  
TGCTGCTCAGCATCATCAGGGGGTGGGTGA  
>TADA1\_LsgRNA58  
TTTTGCTGCGGAACCCCTGGCCAAGGCAA  
>TADA1\_LsgRNA59  
ATGGGCTGGACAATGTCACCGAGGAGGCTG  
>TADA1\_LsgRNA60  
TGGTGCTGGATCTTTGCCTTGCCAGGGGG  
>TADA1\_LsgRNA61  
AGAAGCTGGATTCTGACCAGCACAGGGAGC  
>TADA1\_LsgRNA62  
GCCAGGAGGAAATCATTGTGAGAATGGACT  
>TADA1\_LsgRNA63  
TGCTGGATCTTTGCCTTGCCAGGGGGTTC  
>TADA1\_LsgRNA64  
GTAGGGATGACTTCCCTGTGCACCTGGGAT  
>TADA1\_LsgRNA65  
CCAGGGCCTCGCTTAAGTTCTTCTTGCCG  
>TADA1\_LsgRNA66  
GCCAGGGGGTTCCGCAGCAAAAACCTGGAAA  
>TADA1\_LsgRNA67  
TTCTGTTCGTCAGAAATTTGATGTAGGTTG  
>TADA1\_LsgRNA68  
AGCTGTTGTCTATGCTGTGGAGGTTGGTTT  
>TADA1\_LsgRNA69  
CAAAGTTTCAAGTCGTCATCATCTTGGGGA  
>TADA1\_LsgRNA70  
TATTGTTTCTGCCTCTGCAGATACTGGGCT  
>TADA1\_LsgRNA71  
ACACTATTCTTCAGGTATGGCTGCGGGGTC  
>TADA1\_LsgRNA72  
ACACTCTACCTGCATCTTTGCCTCCGGTGA  
>TADA1\_LsgRNA73  
ACTGTCTATGCTCTTAACATTGAAAGGATC  
>TADA1\_LsgRNA74  
ATCTTCTGCTTGAACCACAGCTTTAGGTTA

>TADA1\_LsgRNA75  
 ATACTGACGTCAGTTGTGTCAAGAAGGAAA  
 >TADA1\_LsgRNA76  
 TGTGTGAGAAGTCTATGAGCTTCAAGGTCA  
 >TADA1\_LsgRNA77  
 CTGCTGCTCAGCATCATCAGGGGGTGGGTG  
 >TADA1\_LsgRNA78  
 GTCTTGCTGCAGCTCTTCATGATTTGGATG  
 >TADA1\_LsgRNA79  
 AGCCTGCTGCTCAGCATCATCAGGGGGTGG  
 >TADA1\_LsgRNA80  
 GTGCTGGATCTTTGCCTTGGCCAGGGGGTT  
 >TADA1\_LsgRNA81  
 GTTGTGTCAAGAAGGAAAGCTTATCGGTTA  
 >TADA1\_LsgRNA82  
 AGAGTGTCTCCGGAGCATGCCAGCAGGAGT  
 >TADA1\_LsgRNA83  
 AAGTTTCAAGTCGTCATCATCTTGGGGATC  
 >TADA1\_LsgRNA84  
 CATGTTACCCGGAGGCAAAGATGCAGGTAG  
 >TADA1\_LsgRNA85  
 ATATTTCTGTCTCCTAGATGGTGCTGGATC  
 >TADA1\_LsgRNA86  
 AAAGTTTCAAGTCGTCATCATCTTGGGGAT  
 >TADA1\_LsgRNA87  
 ATTGTTTCTGCCTCTGCAGATACTGGGCTA

(25)  $S_8^-$ : 51 low on-target activity sgRNAs targeting HPRT1

>HPRT1\_LsgRNA1  
 GGTGAAAAGGACCCACGAAGTGTGGATA  
 >HPRT1\_LsgRNA2  
 TGATAAAATCTACAGTCATAGGAATGGATC  
 >HPRT1\_LsgRNA3  
 AAAAAAGTAATTCACTTACAGTCTGGCTT  
 >HPRT1\_LsgRNA4  
 TTCCAAATCCTCAGCATAATGATTAGGTAT  
 >HPRT1\_LsgRNA5  
 TTTTAACTAGAATGACCAGTCAACAGGGGA  
 >HPRT1\_LsgRNA6  
 GCAAAAATAAATCAAGGTCATAACCTGGTTC  
 >HPRT1\_LsgRNA7  
 AAACAATGCAGACTTTGCTTTCCTTGGTCA  
 >HPRT1\_LsgRNA8  
 GTCAACAGGGGACATAAAAAGTAATTGGTGG

>HPRT1\_LsgRNA9  
TTTAACTAGAATGACCAGTCAACAGGGGAC  
>HPRT1\_LsgRNA10  
ATGCAGACTTTGCTTTCCTTGGTCAGGCAG  
>HPRT1\_LsgRNA11  
CGCCAGGGCTGCGGGTCGCCATAACGGAGC  
>HPRT1\_LsgRNA12  
TGAAATTCCAGACAAGTTTGTGTAGGATA  
>HPRT1\_LsgRNA13  
AATCCAAAGATGGTCAAGGTCGCAAGGTAT  
>HPRT1\_LsgRNA14  
AGCACACAGAGGGCTACAATGTGATGGCCT  
>HPRT1\_LsgRNA15  
TGCTCACCACGACGCCAGGGCTGCGGGTCG  
>HPRT1\_LsgRNA16  
TTTTTCAGATTAGTGATGATGAACCAGGTTA  
>HPRT1\_LsgRNA17  
TTTGCATACCTAATCATTATGCTGAGGATT  
>HPRT1\_LsgRNA18  
TGCTCGAGATGTGATGAAGGAGATGGGAGG  
>HPRT1\_LsgRNA19  
ATTCCTCATGGACTAATTATGGACAGGTAA  
>HPRT1\_LsgRNA20  
CAGTCTGATAAAATCTACAGTCATAGGAAT  
>HPRT1\_LsgRNA21  
TTACCTGTCCATAATTAGTCCATGAGGAAT  
>HPRT1\_LsgRNA22  
CTGGCTTATATCCAACACTTCGTGGGGTCC  
>HPRT1\_LsgRNA23  
TTTTCTTCTAGAATGTCTTGATTGTGGAAG  
>HPRT1\_LsgRNA24  
ATACCTTGCGACCTTGACCATCTTTGGATT  
>HPRT1\_LsgRNA25  
CCCTGAAGTATTCATTATAGTCAAGGGCAT  
>HPRT1\_LsgRNA26  
GGCCGAGCTGCTCACCACGACGCCAGGGCT  
>HPRT1\_LsgRNA27  
TGGAGATGATCTCTCAACTTTAACTGGAAA  
>HPRT1\_LsgRNA28  
TCGAGATGTGATGAAGGAGATGGGAGGCCA  
>HPRT1\_LsgRNA29  
TCTGGCTTATATCCAACACTTCGTGGGGTC  
>HPRT1\_LsgRNA30  
GTCTGGCTTATATCCAACACTTCGTGGGGT



>HPRT1\_LsgRNA31  
 AACAGGGGACATAAAAAGTAATTGGTGGAGA  
 >HPRT1\_LsgRNA32  
 CATTGTAGCCCTCTGTGTGCTCAAGGGGGG  
 >HPRT1\_LsgRNA33  
 TTCAGTGCTTTGATGTAATCCAGCAGGTCA  
 >HPRT1\_LsgRNA34  
 GCATGTTTGTGTCATTAGTGAAACTGGAAA  
 >HPRT1\_LsgRNA35  
 GCTATAAATTCTTTGCTGACCTGCTGGATT  
 >HPRT1\_LsgRNA36  
 TACCTAATCATTATGCTGAGGATTTGGAAA  
 >HPRT1\_LsgRNA37  
 ATTGTAGCCCTCTGTGTGCTCAAGGGGGG  
 >HPRT1\_LsgRNA38  
 TGATTAGGTATGCAAAATAAATCAAGGTCA  
 >HPRT1\_LsgRNA39  
 GGCATATCCTACAACAAACTTGTCTGGAAT  
 >HPRT1\_LsgRNA40  
 TGTTTATTCTCATGGACTAATTATGGACA  
 >HPRT1\_LsgRNA41  
 CTGCTCACCACGACGCCAGGGCTGCGGGTC  
 >HPRT1\_LsgRNA42  
 ATGATCTCTCAACTTTAACTGGAAAGGTAT  
 >HPRT1\_LsgRNA43  
 AACGTCTTGCTCGAGATGTGATGAAGGAGA  
 >HPRT1\_LsgRNA44  
 TTTTTGAAAGGATATAATTGACACTGGCAA  
 >HPRT1\_LsgRNA45  
 TCCCTGAAGTATTCATTATAGTCAAGGGCA  
 >HPRT1\_LsgRNA46  
 CCCTTGACTATAATGAATACTTCAGGGATT  
 >HPRT1\_LsgRNA47  
 TCTTTGGATTATACTGCCTGACCAAGGAAA  
 >HPRT1\_LsgRNA48  
 ACATTGTAGCCCTCTGTGTGCTCAAGGGGG  
 >HPRT1\_LsgRNA49  
 GTAATTAACAGCTTGCTGGTGAAAAGGACC  
 >HPRT1\_LsgRNA50  
 ATCATTATGCTGAGGATTTGGAAAAGGTGT  
 >HPRT1\_LsgRNA51  
 GCCCTTGACTATAATGAATACTTCAGGGAT

(26) S<sub>9</sub>: 123 low on-target activity sgRNAs targeting CUL3

>CUL3\_LsgRNA1  
GATGAAAAATATGTAAACAGCATTGGGAC  
>CUL3\_LsgRNA2  
CGTCAAAACTGGAAGGAATGTTTAGGGATA  
>CUL3\_LsgRNA3  
ATGAAAAATATGTAAACAGCATTGGGACC  
>CUL3\_LsgRNA4  
AAAAAACATGATATCTAAGTTAAAGGTAA  
>CUL3\_LsgRNA5  
CTCAAAAGCATGTCTTGGTGCTGGTGGGAT  
>CUL3\_LsgRNA6  
AGGTAAAGCTCTTGTCTTCTGAAGAAGGAGA  
>CUL3\_LsgRNA7  
CCGGAAAGGCCCGGATCCGCATCTTGGTGT  
>CUL3\_LsgRNA8  
ACCCAAATCAAAGGAAATAGAAAATGGTCA  
>CUL3\_LsgRNA9  
TAGAAACAATATTGGATAAAGCAATGGTCC  
>CUL3\_LsgRNA10  
AATCAACGGAAGAACCAATTGTAAAGGTGG  
>CUL3\_LsgRNA11  
TGATAAGCTGAAAAGGGAGTCAAAGGGGT  
>CUL3\_LsgRNA12  
TCTGAATATCTCAAAGCATGTCTTGGTGC  
>CUL3\_LsgRNA13  
TTTGAATCTTGACTCTGTGTAGTTGGATG  
>CUL3\_LsgRNA14  
AACCAATTGTAAAGGTGGTTGAAAGGGAAC  
>CUL3\_LsgRNA15  
CAGAACAAGAAGTAGAAACAATATTGGATA  
>CUL3\_LsgRNA16  
GAGCACCATGTCTGAATCTGAGCAAAGGCAC  
>CUL3\_LsgRNA17  
TCCGACCCAGAGAGGAAAGAAACAAGGCAG  
>CUL3\_LsgRNA18  
TTGAACGTTATTATAAACAACACTTGGCAA  
>CUL3\_LsgRNA19  
AAGGACTTATTGAGAGAGAATATTTGGCAC  
>CUL3\_LsgRNA20  
GAGGAGAGACTCACCGAAAGGCCCGGATC  
>CUL3\_LsgRNA21  
TTAAAGAGCATTAATATGGTCATCTGGAAA  
>CUL3\_LsgRNA22  
CATGAGATAGAAGCTGCTATAGTGCGGATA

>CUL3\_LsgRNA23  
CGGAAGGACACCAAGATGCGGATCCGGGCC  
>CUL3\_LsgRNA24  
ATTCAGGCAACATCTACAGGCAACTGGTGT  
>CUL3\_LsgRNA25  
TGTGAGTGTATGAGTTCCTATTTGAGGGAG  
>CUL3\_LsgRNA26  
TATGAGTTCCTATTTGAGGGAGCAAGGTAA  
>CUL3\_LsgRNA27  
ATCAATAAATAATGAGAGGTATTCAGGAGA  
>CUL3\_LsgRNA28  
TTCAATACGTTTCTTAATAACAACCTGGACT  
>CUL3\_LsgRNA29  
GACTATAGTAGAAATGGAGAATTCTGGGCT  
>CUL3\_LsgRNA30  
GAGAATATTTGGCACGAACACCTGAGGATC  
>CUL3\_LsgRNA31  
AGAAAATCCAGCGTAAGAATAACAGTGGTCT  
>CUL3\_LsgRNA32  
GGATATGATTGCAAGAGAGCGGAAAGGAGA  
>CUL3\_LsgRNA33  
GTGGATGTCAGTTCACGTCAAACTGGAAG  
>CUL3\_LsgRNA34  
CGTTATTATAAACAACACTTGGCAAGGAGA  
>CUL3\_LsgRNA35  
CTCTATTATTAAGAGCATTAAATATGGTCA  
>CUL3\_LsgRNA36  
AGGTATTCAGGAGACCTGGAGTTGAGGTTG  
>CUL3\_LsgRNA37  
ATTTATTGATGATAAGCTGAAAAAGGGAGT  
>CUL3\_LsgRNA38  
ACGTCAAACTGGAAGGAATGTTTAGGGAT  
>CUL3\_LsgRNA39  
TGAGCAAAGGCACGGGCAGCCGGAAGGACA  
>CUL3\_LsgRNA40  
CCCGCAATAGTTTGTAAAGAGACGGTCA  
>CUL3\_LsgRNA41  
ACTACACAGAGTCAAGATTCAAACAGGTAT  
>CUL3\_LsgRNA42  
ATGTCAGTTCACGTCAAACTGGAAGGAAT  
>CUL3\_LsgRNA43  
AGCACATGAAGACTATAGTAGAAATGGAGA  
>CUL3\_LsgRNA44  
TAAACATGGAGAAAAGCTCTACACTGGACT

>CUL3\_LsgRNA45  
CGGTCATTGTTGAATGATTCCAGGAGGAAG  
>CUL3\_LsgRNA46  
GAACCCGCTGTGTTGGTTTACCACAGGCGA  
>CUL3\_LsgRNA47  
CTCGCCTGTGGTAAACCAACACAGCGGGTT  
>CUL3\_LsgRNA48  
TTTTTCGAGATCAAGTTGTACGTTATGGGTG  
>CUL3\_LsgRNA49  
TGGGCTAGTACATATGTTGAAAAATGGAAA  
>CUL3\_LsgRNA50  
AGCTCTATAGAAATGCATATACAATGGTTT  
>CUL3\_LsgRNA51  
ACAGCTCACACTCCAGCATCATATGGGTTC  
>CUL3\_LsgRNA52  
CCGTCTCTTTAAACAAACTATTGCGGGTGA  
>CUL3\_LsgRNA53  
AGATCTGCAGAACCCATATGATGCTGGAGT  
>CUL3\_LsgRNA54  
TCGCCTGTGGTAAACCAACACAGCGGGTTC  
>CUL3\_LsgRNA55  
AGCTCTTGT'TTCTGAAGAAGGAGAAGGAAA  
>CUL3\_LsgRNA56  
TTCCCTTTCAACCACCTTTACAATTGGTTC  
>CUL3\_LsgRNA57  
GAAAGAATCCTGTTGACTATATCCAGGTAA  
>CUL3\_LsgRNA58  
CTTGGAATGATCATCAAACAGCTATGGTGA  
>CUL3\_LsgRNA59  
CTAAGACCACTGTTATTCTTACGCTGGATT  
>CUL3\_LsgRNA60  
TCGAGACCTAAAATCATTAAACATCTGGCAA  
>CUL3\_LsgRNA61  
TTTTCGAGATCAAGTTGTACGTTATGGGTGT  
>CUL3\_LsgRNA62  
GTGTGAGCTGTCGACCACTGTGTTTGGCTA  
>CUL3\_LsgRNA63  
CCAAGATGCGGATCCGGGCCTTTCCGGTGA  
>CUL3\_LsgRNA64  
GGAAGATGGATCTGAAGTTGGTGTGGAGG  
>CUL3\_LsgRNA65  
TGCAGCACAATGTTCTAGTAGCGGAGGTGA  
>CUL3\_LsgRNA66  
AGATGCAGCACAATGTTCTAGTAGCGGAGG

>CUL3\_LsgRNA67  
GGCAGCCGGAAGGACACCAAGATGCGGATC  
>CUL3\_LsgRNA68  
TTCTGCCTTGTTTCTTTCTCTCTGGGTCG  
>CUL3\_LsgRNA69  
CCGTGCCTTTGCTCAGATTGACATGGTGC  
>CUL3\_LsgRNA70  
GACAGCTCACACTCCAGCATCATATGGGTT  
>CUL3\_LsgRNA71  
TAGGGCTCTAACAAGCTCTCTTTCAGGGAT  
>CUL3\_LsgRNA72  
ATAAGCTGAAAAAGGGAGTCAAAGGGGTAA  
>CUL3\_LsgRNA73  
TGGTGCTGGTGGGATGTTGCACTTTGGTGT  
>CUL3\_LsgRNA74  
AAGGGCTTATTGGATCTGAAGAGTAGGTTC  
>CUL3\_LsgRNA75  
GAGCGGAAAGGAGAAGTCGTAGACAGGTAA  
>CUL3\_LsgRNA76  
CAACGGAAGAACCAATTGTAAAGGTGGTTG  
>CUL3\_LsgRNA77  
GGAAGGACACCAAGATGCGGATCCGGGCCT  
>CUL3\_LsgRNA78  
AGATGGATCTGAAGTTGGTGTGGAGGTGC  
>CUL3\_LsgRNA79  
AGACGGTCATTGTTGAATGATTCCAGGAGG  
>CUL3\_LsgRNA80  
GTGTGTATGTACAACAAAATAATGTGGAGA  
>CUL3\_LsgRNA81  
CCATGTTCGAATCTGAGCAAAGGCACGGGCA  
>CUL3\_LsgRNA82  
TAATGTGGAGAACGTCTACAATTTGGGATT  
>CUL3\_LsgRNA83  
TTAGGTGGTGTGATCTTACAGTCCGGGTG  
>CUL3\_LsgRNA84  
ATATGTGTATACTTTGCGATCCTCAGGTGT  
>CUL3\_LsgRNA85  
GTGAGTGTATGAGTTCCTATTTGAGGGAGC  
>CUL3\_LsgRNA86  
CGCTGTGTTGGTTTACCACAGGCGAGGGAC  
>CUL3\_LsgRNA87  
AGTTGTTATTAAGAAACGTATTGAAGGACT  
>CUL3\_LsgRNA88  
ATTGGTCTTCCGTTGATTTGTCAAGGCAG

>CUL3\_LsgRNA89  
TGGTGTGGAGGTGCACAAGTAACTGGCTC  
>CUL3\_LsgRNA90  
GCATTAATATGGTCATCTGGAAAGTGGAAA  
>CUL3\_LsgRNA91  
TTCTTACAAAAGAACCCAAATCAAAGGAAA  
>CUL3\_LsgRNA92  
GGTTTACCACAGGCGAGGGACTGTAGGGCT  
>CUL3\_LsgRNA93  
TTGTTACCGAACATCTCATAAATAAGGTAT  
>CUL3\_LsgRNA94  
TTGATACCTTATTTATGAGATGTTTCGGTAA  
>CUL3\_LsgRNA95  
TTTCTACTATAGTCTTCATGTGCTTGGAAA  
>CUL3\_LsgRNA96  
ATAATAGAGAAAAATACACATTTGAGGTAT  
>CUL3\_LsgRNA97  
AGAGTAGGTTTCGATCGCTTCCTCCTGGAAT  
>CUL3\_LsgRNA98  
ACTATAGTAGAAATGGAGAATTCTGGGCTA  
>CUL3\_LsgRNA99  
TATTTATTGATGATAAGCTGAAAAAGGGAG  
>CUL3\_LsgRNA100  
TATCTCAAAGCATGTCTTGGTGCTGGTGG  
>CUL3\_LsgRNA101  
GGGATCATCTACGGCAAACCTCTATTGGATA  
>CUL3\_LsgRNA102  
CGGATCCGCATCTTGGTGTCTTCCGGCTG  
>CUL3\_LsgRNA103  
CATGTCGAATCTGAGCAAAGGCACGGGCAG  
>CUL3\_LsgRNA104  
AAATTCTGCAGACATTTCCAAAAAAGGAGC  
>CUL3\_LsgRNA105  
TGGATGAATTCAGGCAACATCTACAGGCAA  
>CUL3\_LsgRNA106  
AATCTGAGCAAAGGCACGGGCAGCCGGAAG  
>CUL3\_LsgRNA107  
TTTCTGCCTTGTTTCTTTCTCTCTGGGTC  
>CUL3\_LsgRNA108  
CTATTGGATATGATTGCAAGAGAGCGGAAA  
>CUL3\_LsgRNA109  
CTGGTGGGATGTTGCACTTTGGTGTGGCTG  
>CUL3\_LsgRNA110  
TCTCTGGGTCGGATTACCTTGTTTGGCAG

>CUL3\_LsgRNA111  
 TAGGTGGTGTGATCTTACAGTCCGGGTGC  
 >CUL3\_LsgRNA112  
 AAGTTGTACGTTATGGGTGTATTAGGGATC  
 >CUL3\_LsgRNA113  
 ATAATGTGGAGAACGTCTACAATTTGGGAT  
 >CUL3\_LsgRNA114  
 GCCTTGTTCCTTCTCTCTGGGTCCGGATT  
 >CUL3\_LsgRNA115  
 TTTTTTAAAAATGAAACAGGAAGATGGATC  
 >CUL3\_LsgRNA116  
 CAAGTTATTTAGTCGTGTGCCAAATGGTTT  
 >CUL3\_LsgRNA117  
 TTTCTTCAAACGCTAAATCAAGCTTGAAT  
 >CUL3\_LsgRNA118  
 ACGTTTCTTAATAACAACCTGGACTTGGTAA  
 >CUL3\_LsgRNA119  
 TATGTTGAAAAATGGAAAGACAGAAGGTAA  
 >CUL3\_LsgRNA120  
 CAAGTTGTACGTTATGGGTGTATTAGGGAT  
 >CUL3\_LsgRNA121  
 GAGCTTTACCTTGCTCCCTCAAATAGGAAC  
 >CUL3\_LsgRNA122  
 TCTTTTCTTGCATAAACCTAAAAAGGACC  
 >CUL3\_LsgRNA123  
 TTCTTTTGTAAGAACCCGCTGTGTTGGTTT

(27)  $S_{10}^-$ : 588 low on-target activity sgRNAs targeting NF1

>NF1\_LsgRNA1  
 AATAAAAAATAGGATTCCCAGCTTTGGAAG  
 >NF1\_LsgRNA2  
 TTCCAAAAATCTAACGTGAGGTGTGGCTC  
 >NF1\_LsgRNA3  
 TTAGAAAACATGTTCCAGAGCAGTTGGTAG  
 >NF1\_LsgRNA4  
 TCCTAAAAGGCAAGAAATGGAATCAGGGAT  
 >NF1\_LsgRNA5  
 GTGCAAAATTAACGACTCCTGAAGGGTA  
 >NF1\_LsgRNA6  
 AAGAAAACAGGGGCCGAAACCCAAGGCAG  
 >NF1\_LsgRNA7  
 CAGAAAAGAGTGATGGCACTGCTGAGGCGC  
 >NF1\_LsgRNA8  
 ACGAAAAGCTCTTGCTGGCCATGGAGGAAG

>NF1\_LsgRNA9  
ATCAAAAAGGAGATACTTACACAACAGGAAA  
>NF1\_LsgRNA10  
CCTAAAAGGCAAGAAATGGAATCAGGGATC  
>NF1\_LsgRNA11  
GATGAAAAGTGCGCAAACAGGTGGCAGGAAA  
>NF1\_LsgRNA12  
GTGGAAAATACCAGTCAAATGTCCATGGATC  
>NF1\_LsgRNA13  
GAGTAAATCCACTTACCTATAGGAAGGGTC  
>NF1\_LsgRNA14  
CAGGAAATCCATGAGCCTGGACATGGGGCA  
>NF1\_LsgRNA15  
TTCTAAATGACATTTATTATGCTTCGGAAA  
>NF1\_LsgRNA16  
TCATAAATTCCTCAAACCTTGAAGTGGTAA  
>NF1\_LsgRNA17  
AGACAACAAGAGCTCTTGGTTGCAGGGATG  
>NF1\_LsgRNA18  
TGGAAACAGTCACAGAAGCTTTGTTGGAGA  
>NF1\_LsgRNA19  
CTGTAACAGTGGACGAACTCGCCACGGATC  
>NF1\_LsgRNA20  
TTATAACCAAAGAAAACCTTGTATTTGGAAA  
>NF1\_LsgRNA21  
TCAAAAACCAGTGCAACAGGTGGCTTGGGAT  
>NF1\_LsgRNA22  
CATAAACCTGATGTCTCTAGTAACTGGCCC  
>NF1\_LsgRNA23  
GCTGAACTTCGGAATTCTGCCTCTGGGGTT  
>NF1\_LsgRNA24  
CTCTAACTTTAACTTTGCATTGGTTGGACA  
>NF1\_LsgRNA25  
AGGGAAGATGAGCTGCCACATCAAGGGAAT  
>NF1\_LsgRNA26  
AGGTAAGATGTTTGGTATTGTGGTGGGGAT  
>NF1\_LsgRNA27  
TGTAAGCAAGTACTTACATCAATTGGGAA  
>NF1\_LsgRNA28  
AGAAAAGCTATTTGACTTGGTGGATGGTTT  
>NF1\_LsgRNA29  
TACCAAGCTGGGACTTCCAAAGCTGGGAAT  
>NF1\_LsgRNA30  
GGGTAAGGAGATGTGGGAGTCAGGAGGGAT



>NF1\_LsgRNA31  
ACTGAAGGCAGCTCTGAACATCTAGGGCAA  
>NF1\_LsgRNA32  
CTGCAAGGTATCCTTCAGAACCTTTGGGAG  
>NF1\_LsgRNA33  
GTAAAATAATGACATTCTGTTTCAAGGTTT  
>NF1\_LsgRNA34  
CAAAAATATGGGGAAGCCTTGGGCAGGTAT  
>NF1\_LsgRNA35  
AGGAAATCCATGAGCCTGGACATGGGGCAA  
>NF1\_LsgRNA36  
TTTTAATGGCTTGTGGCGGTTTGCAGGACC  
>NF1\_LsgRNA37  
CCAAAATGTTTCTACAGGAGCATCAGGATT  
>NF1\_LsgRNA38  
AATTAATTACAGGGCTCGTCCAACCTGGTCC  
>NF1\_LsgRNA39  
TTTGAATTCTGTAGAAGTTATTTCTGGACA  
>NF1\_LsgRNA40  
TCCAAATTTGTTAAATCCAATCCATGGAAT  
>NF1\_LsgRNA41  
CTTAACAATAAGCTCAGCATAAGTCTGGAAT  
>NF1\_LsgRNA42  
TCTGACACAGACTCCCTACAGGAATGGATC  
>NF1\_LsgRNA43  
AGGCACACTCCCCAAGGGCACAAAGGAAG  
>NF1\_LsgRNA44  
GGATACACTGGAAAATGTCTTGCTGGGGT  
>NF1\_LsgRNA45  
TGAAACACTTCATAAAGCAGTGCAAGGTTG  
>NF1\_LsgRNA46  
ACTGACACTTCATCCACCCACACCGGATA  
>NF1\_LsgRNA47  
AAGTACAGAAGAAGCTGACCATAGAGGAGT  
>NF1\_LsgRNA48  
ACTAACCAAGCAACTTCTTAGTGTTGGCCT  
>NF1\_LsgRNA49  
CCCTACCACTGGCCACTGTAACAGTGGACG  
>NF1\_LsgRNA50  
GGCAACCAGAACAGCTTCAGTGTGAGGGTT  
>NF1\_LsgRNA51  
GGAAACCAGCATGCAGCTGAACTTCGGAAT  
>NF1\_LsgRNA52  
CAAAACCAGTGCAACAGGTGGCTTGGGATC

>NF1\_LsgRNA53  
CTCCACCATTCTATAGGAATAAGATGGTAG  
>NF1\_LsgRNA54  
CTAGACCCACCAGATCCTTAACATTGGTCC  
>NF1\_LsgRNA55  
TCTTACCGGTGCCATTTCGTATTGCTGGGTG  
>NF1\_LsgRNA56  
GCATACCTCAGTGTTCCTGCAGTGGGATG  
>NF1\_LsgRNA57  
AATGACCTGTCCCGGTAACCTGGAACGGAAG  
>NF1\_LsgRNA58  
GTTACCTTAACCATTGCAAACCAGGGCAC  
>NF1\_LsgRNA59  
TTGTACCTTTAATTTAAAAATCGAGGGCCA  
>NF1\_LsgRNA60  
AAATACGGACCAATGTTAAGGATCTGGTGG  
>NF1\_LsgRNA61  
GACCACGGCCTGGACCCATTCCACCGGCCT  
>NF1\_LsgRNA62  
GGAAACGTGGCATGTCTCGGAGGCTGGCAT  
>NF1\_LsgRNA63  
CCTTACGTTCACTGACTGGACCCATGGGTG  
>NF1\_LsgRNA64  
TTCAACGTTCTCCTTGTTCGATTCTGGAGA  
>NF1\_LsgRNA65  
GGAGACGTTGTCGTAAGCAAAGCCAGGAAA  
>NF1\_LsgRNA66  
TCTTACTAATAGAGACAATAAAGAGGGTGT  
>NF1\_LsgRNA67  
GAGAACTCCCTATAGCGATGGCTCTGGCCA  
>NF1\_LsgRNA68  
AGACACTGAAACTTTACGTAAATGTGGGTG  
>NF1\_LsgRNA69  
TCAGACTGAGTCTCAAACTTGCTTGGTCT  
>NF1\_LsgRNA70  
AGATACTGCTGTAGCTTTGGCTTCTGGAAA  
>NF1\_LsgRNA71  
CATGACTGGCTTCCTTTGTGCCCTTGGGGG  
>NF1\_LsgRNA72  
TCTGACTGTTCTTGCAACAATAGCAGGTGA  
>NF1\_LsgRNA73  
AAGTACTTACTGATCCGAAGATCCAGGCGC  
>NF1\_LsgRNA74  
TGGAACTTACTTTAATAGAACTTTGGTGT

>NF1\_LsgRNA75  
CAGAACTTGACTGTTGTAAGTGCAGGTCC  
>NF1\_LsgRNA76  
TCAAAC TTTGAACTGGTAAGGTTAAGGCTG  
>NF1\_LsgRNA77  
GTGCAGAAAAGCTATTTGACTTGGTGGATG  
>NF1\_LsgRNA78  
CATGAGAAAGTGGGACTTCAAATACGGACC  
>NF1\_LsgRNA79  
GCACAGAAATTCTCAAGTGGTTGCGGGAAA  
>NF1\_LsgRNA80  
TAAGAGAACACTTTACCTGTCC TTGGGAGT  
>NF1\_LsgRNA81  
AGTAAGAAGCAGCGCCTGGATCTTCGGATC  
>NF1\_LsgRNA82  
TCACAGAAGCTTTGTTGGAGATCATGGAGG  
>NF1\_LsgRNA83  
AACCAAGAGCTCTTGTTGCAGGGATGGATT  
>NF1\_LsgRNA84  
GGTAAGATGTTTGGTATTGTGGTGGGGATT  
>NF1\_LsgRNA85  
CAGAAGATTATAGGCAGCTGACCTAGGAGA  
>NF1\_LsgRNA86  
TCAGAGATTTGGACCAGGCAAGCATGGAAG  
>NF1\_LsgRNA87  
TCAAAGCAAAGTCTCTCTCATAGGAGC  
>NF1\_LsgRNA88  
GTAAAGCAAGTACTTACATCAATTGGGAAG  
>NF1\_LsgRNA89  
GTGGAGCACACCCAGCAATACGAATGGCAC  
>NF1\_LsgRNA90  
GAGTAGCAGAACTGATTATGAAATGGGTG  
>NF1\_LsgRNA91  
AGGAAGCAGATATCCGGTGTGGGGTGGATG  
>NF1\_LsgRNA92  
GAATAGCAGTAACTCTTTGTCGTTTGGCAT  
>NF1\_LsgRNA93  
TGTAAGCATACTGGTATAAACAGTGGCAC  
>NF1\_LsgRNA94  
GCACAGCCACAGCTACCCAAAAGAGGGCTT  
>NF1\_LsgRNA95  
CCCGAGCCAGGAAATCCATGAGCCTGGACA  
>NF1\_LsgRNA96  
GACAAGCCCAGACCAAAC TAGAAGTGGCCC

>NF1\_LsgRNA97  
CTATAGCGATGGCTCTGGCCAATGTGGTTC  
>NF1\_LsgRNA98  
TTAAAGCGATTGCTAGGCCCGGTATGGGTA  
>NF1\_LsgRNA99  
ATAAAGCTACAGTAAAAGAAAAAAGGAAA  
>NF1\_LsgRNA100  
ACTAAGCTGGCTCTGCAGTGCAGGAGGGTA  
>NF1\_LsgRNA101  
ACAAAGCTTCTGTGACTGTTTCCAAGGATG  
>NF1\_LsgRNA102  
CAGAAGCTTTGTTGGAGATCATGGAGGTAT  
>NF1\_LsgRNA103  
CCAGAGGAAGTATTTATGGCAATCCGGAAT  
>NF1\_LsgRNA104  
ATCAAGGAGAACTCCCTATAGCGATGGCTC  
>NF1\_LsgRNA105  
AAGAAGGAGATGGTGTGGAATTGATGGAAG  
>NF1\_LsgRNA106  
GGTAAGGAGATGTGGGAGTCAGGAGGGATT  
>NF1\_LsgRNA107  
TTCCAGGCAGGTACGTGTCAATCAAGGCAT  
>NF1\_LsgRNA108  
CAAGAGGCAGTCAGCCTGCAGATGTGGATC  
>NF1\_LsgRNA109  
TAAGAGGCGAATGTCCCATGTGAGTGGAGG  
>NF1\_LsgRNA110  
TTGCAGGTAAGATGTTTGGTATTGTGGTGG  
>NF1\_LsgRNA111  
TGCAAGGTATCCTTCAGAACCTTTGGGAGA  
>NF1\_LsgRNA112  
GGTAAGGTCCACTACAATTTTCATATGGCTT  
>NF1\_LsgRNA113  
ACAAAGGTGTTTCAATTCAATACCTGGAAA  
>NF1\_LsgRNA114  
AGGGAGTACACCAAGTATCATGAGCGGCTG  
>NF1\_LsgRNA115  
AGGCAGTACAGCAGAATTAATTACAGGGCT  
>NF1\_LsgRNA116  
TGGGAGTCAGGAGGGATTCTTCACTGGTTT  
>NF1\_LsgRNA117  
TCATAGTCTTTCCTTCATAAGTGACGGCAA  
>NF1\_LsgRNA118  
AGACAGTGGTCTCATGCACTCCATAGGTGA

>NF1\_LsgRNA119  
GAGCAGTGTCCCAGGGACATCTTTTGGCCG  
>NF1\_LsgRNA120  
AAGAAGTGTGGCCATCTTATCAAAAAGGTCG  
>NF1\_LsgRNA121  
CATCAGTTAGATAGCATTGATTTGTGGAAT  
>NF1\_LsgRNA122  
TAGCAGTTATAAATAGCCTGGAAAAGGTAA  
>NF1\_LsgRNA123  
GACAATAAAGAGGGTGTGTTGGCAGGGAT  
>NF1\_LsgRNA124  
ATCTATAACTGTAACCTCTGGGTCAGGGAG  
>NF1\_LsgRNA125  
CCACATAAGATGTTGTTCTAAAGTAGGAGT  
>NF1\_LsgRNA126  
CTATATAGGTATGTTTCGTGTGCTTGGGAAT  
>NF1\_LsgRNA127  
GTCTATATCTATAACTGTAACCTCTGGGTC  
>NF1\_LsgRNA128  
TTTCATCAAAACCAGTGCAACAGGTGGCTT  
>NF1\_LsgRNA129  
TGGGATCAATAAAAAGCTGAGGTGATGGCAG  
>NF1\_LsgRNA130  
ATTCATCATGGTGACCCTTCCTATAGGTAA  
>NF1\_LsgRNA131  
GTCAATCATTAGATCCACATCTGCAGGCTG  
>NF1\_LsgRNA132  
ACCCATCTATTCAAGCAAAAATATGGGGAA  
>NF1\_LsgRNA133  
CCTAATCTCCAAAATGTTTCTACAGGAGC  
>NF1\_LsgRNA134  
CCCTATCTTGCTGCAGAACTCAGAGGATT  
>NF1\_LsgRNA135  
TTGGATCTTGGCACAATGATAACAGGGTGT  
>NF1\_LsgRNA136  
CTTCATGATCCATGGACATTTGACTGGTAT  
>NF1\_LsgRNA137  
GATGATGATGTAAAATGTCTTACAAGGTAA  
>NF1\_LsgRNA138  
CCTGATGCTCCTGTAGAAACATTTTGGGAG  
>NF1\_LsgRNA139  
GGGAATGCTGGGAAGTTGCAAGTGAGGTCA  
>NF1\_LsgRNA140  
CTGCATGCTGGTTTCCTTCACGACAGGTGT

>NF1\_LsgRNA141  
GCCAATGTCCCATGTGAGTGGAGGAGGATC  
>NF1\_LsgRNA142  
CTCTATGTGCTCAGCCAGTTTCCAGGACA  
>NF1\_LsgRNA143  
GTAAATGTGGGTGCTGTTGTGATGAGGAAA  
>NF1\_LsgRNA144  
GCCAATGTGGTTCCTTGTTCTCAGTGGGTA  
>NF1\_LsgRNA145  
ATGAATGTGTTATAGTTGGGCAAGAGGTTA  
>NF1\_LsgRNA146  
CCTTATTAAGAAGTGGCTGTAATTTGGTTA  
>NF1\_LsgRNA147  
CCAAATTACAGCCACTTCTTAATAAGGTAA  
>NF1\_LsgRNA148  
GTGTATTAGCAAACGAGTGTCTCATGGGCA  
>NF1\_LsgRNA149  
CCGGATTGCCATAAATACTTCTCTGGACT  
>NF1\_LsgRNA150  
TGCCATTGTCTCACCGTATGAAGCAGGGAT  
>NF1\_LsgRNA151  
TGGTATTGTGGTGGGGATTCTTCATGGTAC  
>NF1\_LsgRNA152  
CGGCATTTACTCTACCAACTGCTCTGGAAC  
>NF1\_LsgRNA153  
TATGATTTTCAGTGATGTCTTCAGAGGGAAA  
>NF1\_LsgRNA154  
TAAAATTTGATTTGTTGCAGGTTTTGGTTT  
>NF1\_LsgRNA155  
CAAGCAAAAATATGGGGAAGCCTTGGGCAG  
>NF1\_LsgRNA156  
TACCCAAAAGAGGGCTTTGTGCAGAGGCGA  
>NF1\_LsgRNA157  
TGCGCAAACAGGTGGCAGGAAACGTGGCAT  
>NF1\_LsgRNA158  
GTGTCAAATTCTGTGCCTTGTGAAGGATT  
>NF1\_LsgRNA159  
AAGACAACAAGAGCTCTTGGTTGCAGGGAT  
>NF1\_LsgRNA160  
CAACCAAGAGCTCTTGTGTCTTTGGGTGT  
>NF1\_LsgRNA161  
CTAGCAAGTTCTTCATTATAGCTATGGTTT  
>NF1\_LsgRNA162  
ATGGCAATCCGGAATCCTCTGGAGTGGCAC

>NF1\_LsgRNA163  
GAAACAATGATGTTAAATCTGGTCAGGTAA  
>NF1\_LsgRNA164  
ATCACAAATTCGTAATAAAGGATCCAGGAGT  
>NF1\_LsgRNA165  
GTGGCACACACTTCGAAGTTGAGGGGGGAA  
>NF1\_LsgRNA166  
TTGACACACTTGCAGAAACAGTATTGGCTG  
>NF1\_LsgRNA167  
ATATCACATCCTACCCCGTAAAAAAGGAGA  
>NF1\_LsgRNA168  
CAAGCACATTGCCGTCACCTTATGAAGGAAA  
>NF1\_LsgRNA169  
AGTTCACCTTAACCATTGCAAACCAGGGCA  
>NF1\_LsgRNA170  
CCTTCACGACAGGTGTGAAGAAAATGGCAG  
>NF1\_LsgRNA171  
AGGACACTAAAGGAGACTCAGCCATGGTCC  
>NF1\_LsgRNA172  
GATACACTGGAAAAATGTCTTGCTGGGGTA  
>NF1\_LsgRNA173  
CTTGCAGAAACAGTATTGGCTGATCGGTTT  
>NF1\_LsgRNA174  
AGCACAGAAATTCCTCAAGTGGTTGCGGGAA  
>NF1\_LsgRNA175  
CCCTCAGAACAGCATCGGTGCAGTAGGAAG  
>NF1\_LsgRNA176  
AGGCCAGAATTGCTTCTCTGCTGGAGGCAC  
>NF1\_LsgRNA177  
ATATCAGACACAAAGGCTCCTAAAAGGCAA  
>NF1\_LsgRNA178  
TCAGCAGAGCGAACAAGTCCCTAGGGCAA  
>NF1\_LsgRNA179  
TACACAGAGCGTGGCCTACTTAGCAGGTAA  
>NF1\_LsgRNA180  
CAGTCAGCAGCCGCTCATGATACTTGGTGT  
>NF1\_LsgRNA181  
AGCACAGCCACAGCTACCCAAAAGAGGGCT  
>NF1\_LsgRNA182  
GACTCAGCCATGGTCCTCTCCCAAAGGTTC  
>NF1\_LsgRNA183  
TTCCCAGCTTTGGAAGTCCCAGCTTGGTAG  
>NF1\_LsgRNA184  
GAGCCAGGAGAGAATGACCTGTCCCGGTAA

>NF1\_LsgRNA185  
GGAACAGGTACCTTGCTAAGAATACGGATT  
>NF1\_LsgRNA186  
CCTTCAGGTCCTCTTCTAAAGCCAAGGTGG  
>NF1\_LsgRNA187  
CCGACAGTTGGATAGGTGGCTGCAAGGTAT  
>NF1\_LsgRNA188  
ACTTCATAAAGCAGTGCAAGGTTGTGGAGC  
>NF1\_LsgRNA189  
TTTTTCATAGACTGTCCTGGGAACTGGCTG  
>NF1\_LsgRNA190  
TACCCATCTATTCAAGCAAAAATATGGGGA  
>NF1\_LsgRNA191  
AGTGCATGAGACCACTGTCTACGTTGGCAT  
>NF1\_LsgRNA192  
AGGACATGGCCGCGCACAGGCCGGTGAAT  
>NF1\_LsgRNA193  
CTATCATTCATATCCGGACCCGCTGGGAAC  
>NF1\_LsgRNA194  
TTAACATTCTTTAAAATAGTAGTGAGGCCG  
>NF1\_LsgRNA195  
CTATCCAAAAGCCAAAATGGAAGATGGCCA  
>NF1\_LsgRNA196  
AATGCCAAACAGCAAGTAAAATTTGGGTAA  
>NF1\_LsgRNA197  
AGCACCAAACGTAAAGCAGCAGTTTGGCCA  
>NF1\_LsgRNA198  
GTGGCCAAACTGCTGCTTTACGTTTGGTGC  
>NF1\_LsgRNA199  
GCAACCAAGAGCTCTTGTTGTCTTTGGGTG  
>NF1\_LsgRNA200  
TAATCCAAGTAAGCCATTCTCAAGAGGCAG  
>NF1\_LsgRNA201  
TACACCACACTCTGCACAATTCCATGGATT  
>NF1\_LsgRNA202  
GCAACCAGAACAGCTTCAGTGTGAGGTTTC  
>NF1\_LsgRNA203  
ATCTCCAGACAAGAGCTACATTTATGGAAG  
>NF1\_LsgRNA204  
TGTACCAGATCCCACAGACTGATATGGCTG  
>NF1\_LsgRNA205  
TAATCCAGGATATATCCAAAGACGTGGTTG  
>NF1\_LsgRNA206  
ACTTCCATAAATGTAGCTCTTGTCTGGAGA



>NF1\_LsgRNA207  
CCAGCCATATCAGTCTGTGGGATCTGGTAC  
>NF1\_LsgRNA208  
GGACCCATTCCACCGCCTGTGCGCGGCCA  
>NF1\_LsgRNA209  
CACACCCAGCAATACGAATGGCACCGGTAA  
>NF1\_LsgRNA210  
CAAGCCCCTTTTCGATTCTAGGTGGTGGCTT  
>NF1\_LsgRNA211  
GGAACCTGACACTGAAGCTGTTCTGGTTG  
>NF1\_LsgRNA212  
TTTTCCCTTCCGGAGAGAGGCTCCAGGAGT  
>NF1\_LsgRNA213  
ATGGCCGCGCACAGGCCGGTGAATGGGTC  
>NF1\_LsgRNA214  
CTTACCGGTGCCATTTCGTATTGCTGGGTGT  
>NF1\_LsgRNA215  
AATTCCTCAAACCTTTGAACTGGTAAGGTTA  
>NF1\_LsgRNA216  
GGAGCCTCTCTCCGGAAGGGAAAAGGGAAC  
>NF1\_LsgRNA217  
ACTGCCTCTTGAGAATGGCTTACTTGGATT  
>NF1\_LsgRNA218  
AAATCCTGCTTCTTTACAGGTTATTGGAAG  
>NF1\_LsgRNA219  
TACTCCTGGAGCCTCTCTCCGGAAGGGAAA  
>NF1\_LsgRNA220  
TTAACCTTACCAGTTCAAAGTTTGAGGAAT  
>NF1\_LsgRNA221  
TCTACGAAAAGCTCTTGCTGGCCATGGAGG  
>NF1\_LsgRNA222  
AAAACGAACTAGATTTGACAGCCATGGAGT  
>NF1\_LsgRNA223  
TCGTGGAAGCGGCTGACCACGGCCTGGACC  
>NF1\_LsgRNA224  
GAGGCGAATGTCCCATGTGAGTGGAGGAGG  
>NF1\_LsgRNA225  
AATGCGATATTGAGCAGTGTCCAGGGACA  
>NF1\_LsgRNA226  
CAGCCGATCCATAAATTTGCTGACAGGTGT  
>NF1\_LsgRNA227  
GAGGCGCATTGAGCATCCCACTGCAGGAAA  
>NF1\_LsgRNA228  
CCAGCGCTTCTTTGCTTCTGCACTTGGCTT

>NF1\_LsgRNA229  
TGAGCGGCTGCTGACTGGCCTCAAAGGTAG  
>NF1\_LsgRNA230  
TTACCGGGACAGGTCATTCTCTCCTGGCTC  
>NF1\_LsgRNA231  
GGGCCGGTTACCTGCTCGTCTGAAGCGGCTG  
>NF1\_LsgRNA232  
CCTCCGTGCAACATAATAAAAAATAGGATT  
>NF1\_LsgRNA233  
CCAACGTGCAAGTGGCTGGACCAGTGGACA  
>NF1\_LsgRNA234  
TATTTCGTGCATTTCTGTAGGTATATGGTGC  
>NF1\_LsgRNA235  
CTTACGTTCACTGACTGGACCCATGGGTGG  
>NF1\_LsgRNA236  
CCAGCGTTTCCCTCAGAACAGCATCGGTGC  
>NF1\_LsgRNA237  
ACTGCTAACTGCGCAACCTTCTTTAGGGCT  
>NF1\_LsgRNA238  
GATACTAAGCTGGCTCTGCAGTGCAGGAGG  
>NF1\_LsgRNA239  
GAAACTACTGCTTCCATGCTTGCCTGGTCC  
>NF1\_LsgRNA240  
ACTTCTAGTTTGGTCTGGGCTTGTCGGCAA  
>NF1\_LsgRNA241  
CTTACTCAATGCCAACGTAGACAGTGGTCT  
>NF1\_LsgRNA242  
CTTCTCACAGAGGTGGCGGAAACAGGACA  
>NF1\_LsgRNA243  
AGAACTCACCTAAATTTTCATCTCTTGGCAA  
>NF1\_LsgRNA244  
CAGGCTCATGGATTTCTGGCTCGGGGACT  
>NF1\_LsgRNA245  
CTTTCTCATGGTTACACACCATTAAGGACA  
>NF1\_LsgRNA246  
GTGCCTCCAGCAGAGAAGCAATTCTGGCCT  
>NF1\_LsgRNA247  
CAAACCTCCATGAATGTGTTATAGTTGGGCA  
>NF1\_LsgRNA248  
TGGTCTCCCTCTGCAGCCTGAAGAAGGAGA  
>NF1\_LsgRNA249  
CCATCTCCTTCTTCAGGCTGCAGAGGGAGA  
>NF1\_LsgRNA250  
ATGTCTCGGAGGCTGGCATCACTGAGGCAC

>NF1\_LsgRNA251  
TCAACTCTAACTTTAACTTTGCATTGGTTG  
>NF1\_LsgRNA252  
CACACTCTGCACAATTCCATGGATTGGATT  
>NF1\_LsgRNA253  
CTGGCTCTGCAGTGCAGGAGGGTAAGGAGA  
>NF1\_LsgRNA254  
GTAGCTCTTGTCTGGAGATCCTTGTGGTAA  
>NF1\_LsgRNA255  
GACACTGAACTTTACGTAAATGTGGGTGC  
>NF1\_LsgRNA256  
CCCCTGAGAACAAGGAACACATTGGCCA  
>NF1\_LsgRNA257  
CCTACTGCACCGATGCTGTTCTGAGGGAAA  
>NF1\_LsgRNA258  
CCCTCTGCAGCCTGAAGAAGGAGATGGTGT  
>NF1\_LsgRNA259  
ATATCTGCTTCCTCACAGAGGTGGCGGAAA  
>NF1\_LsgRNA260  
CTGACTGGCCTCAAAGGTAGCAAAGGCTT  
>NF1\_LsgRNA261  
ATGACTGGCTTCCTTTGTGCCCTTGGGGGA  
>NF1\_LsgRNA262  
TGGTCTGGGCTTGTTCGGCAAATCGGGGGG  
>NF1\_LsgRNA263  
TTCCTGTTTTCTTCATCAATTCCAGGCAG  
>NF1\_LsgRNA264  
ACACCTGTCAGCAAATTTATGGATCGGCTG  
>NF1\_LsgRNA265  
TCCACTGTTACAGTGGCCAGTGGTAGGGGA  
>NF1\_LsgRNA266  
TTTACTTAAGAAATAACTGTGATTTGGCTT  
>NF1\_LsgRNA267  
AATACTTACACAAAGCAAGAGCTTTGGATC  
>NF1\_LsgRNA268  
TGTCCCTCAACAATTCCTTGATGTGGCAG  
>NF1\_LsgRNA269  
TCAACTTCACTGCAGTCATTCAAAGGTTTC  
>NF1\_LsgRNA270  
CCTGCTTCTTTACAGGTTATTGGAAGGATG  
>NF1\_LsgRNA271  
TGTTCTTGCAACAATAGCAGGTGAAGGATG  
>NF1\_LsgRNA272  
TTTCCTTGCAGAATCCAAGAAAACAGGGGC

>NF1\_LsgRNA273  
GTGGCTTGGGATCAATAAAAGCTGAGGTGA  
>NF1\_LsgRNA274  
GATACTTGGTGTACTCCCTGACCCAGGAGT  
>NF1\_LsgRNA275  
CCTACTTTAGAACAACATCTTATGTGGGAT  
>NF1\_LsgRNA276  
AGGGCTTTGTGCAGAGGCGAGTCCTGGCAA  
>NF1\_LsgRNA277  
ATGTGAAAAGATGACAAACCTGGTAGGATC  
>NF1\_LsgRNA278  
CCAGGAAATCCATGAGCCTGGACATGGGGC  
>NF1\_LsgRNA279  
ACTAGAACAGTAAGAAGCAGCGCCTGGATC  
>NF1\_LsgRNA280  
CATAGAACCCTTACGTTCACTGACTGGACC  
>NF1\_LsgRNA281  
AGCTGAACTTCGGAATTCTGCCTCTGGGGT  
>NF1\_LsgRNA282  
TCATGAAGAATTACTACGTACTCCTGGAGC  
>NF1\_LsgRNA283  
AGTTGAAGATGAAAGTGCGCAAACAGGTGG  
>NF1\_LsgRNA284  
TACTGAAGGCAGCTCTGAACATCTAGGGCA  
>NF1\_LsgRNA285  
ATAGGAAGGGTCACCATGATGAATGGGATA  
>NF1\_LsgRNA286  
GAGAGAATGACCTGTCCCGTAACTGGAAC  
>NF1\_LsgRNA287  
TAGAGACAATAAAGAGGGTGTGTTGGCAG  
>NF1\_LsgRNA288  
TACGGACCAATGTTAAGGATCTGGTGGGTC  
>NF1\_LsgRNA289  
GCTGGACCAGTGTGTATCTGCCACAGGTTT  
>NF1\_LsgRNA290  
CCTTGA CTCTCAGGATAGTGCAGCAGGATG  
>NF1\_LsgRNA291  
GAAAGACTTTGGGAAACACAACACTGGCCT  
>NF1\_LsgRNA292  
ATAAGAGAACACTTTACCTGTCCCTGGGAG  
>NF1\_LsgRNA293  
GCCTGAGAAGGTTGCCCCATGTCCAGGCTC  
>NF1\_LsgRNA294  
AGCTGAGAGAAAATAAAACCCCAGAGGCAG

>NF1\_LsgRNA295  
ATGAGAGATATTCCAACGTGCAAGTGGCTG  
>NF1\_LsgRNA296  
TTGAGAGCATTGTGGAATACCTTCAGGTCC  
>NF1\_LsgRNA297  
CTGTGAGGAAGCAGATATCCGGTGTGGGGT  
>NF1\_LsgRNA298  
TGATGAGGTCAACTTGTATTCAGCAGGTAC  
>NF1\_LsgRNA299  
AGGAGAGTAAATCCACTTACCTATAGGAAG  
>NF1\_LsgRNA300  
AATAGAGTCCAGAGGAAGTATTTATGGCAA  
>NF1\_LsgRNA301  
TGGCGAGTTCGTCCACTGTTACAGTGGCCA  
>NF1\_LsgRNA302  
AGCAGATAATCCGTATTCTTAGCAAGGTAC  
>NF1\_LsgRNA303  
TATGGATACATATCCCATTTCATCATGGTGA  
>NF1\_LsgRNA304  
TCCAGATACATTTATTTACTTTGCAGGTAA  
>NF1\_LsgRNA305  
TTTGGATATATCCTGGATTATTTCTGGACA  
>NF1\_LsgRNA306  
TTTGGATCTTGGCACAATGATAACAGGGTG  
>NF1\_LsgRNA307  
TGAAGATGAAAGTGCGCAAACAGGTGGCAG  
>NF1\_LsgRNA308  
ATTGGATTTAACAAATTTGGATCTTGGCAC  
>NF1\_LsgRNA309  
CTATGATTTTCAGTGATGTCTTCAGAGGGAA  
>NF1\_LsgRNA310  
TCAAGCAAAAATATGGGGAAGCCTTGGGCA  
>NF1\_LsgRNA311  
TTGAGCAAACCTCAATACCTGCCCAAGGCTT  
>NF1\_LsgRNA312  
GATGGCAACACTTCTTGCATACCTGGGTCC  
>NF1\_LsgRNA313  
ATTGGCAACATGTTAGCTTTGAAGTGGATC  
>NF1\_LsgRNA314  
CCTGGCAACCTATAGCCCACCCATGGGTCC  
>NF1\_LsgRNA315  
ACTTGCAACTTCCCAGCATTCCCCAGGTCA  
>NF1\_LsgRNA316  
AAAAGCAACTTTGATGCAGCACGCAGGTAA

>NF1\_LsgRNA317  
AGTGGCACACACTTCGAAGTTGAGGGGGGA  
>NF1\_LsgRNA318  
AAAGGCACTTGAGAGTTGCTTAAAAGGACC  
>NF1\_LsgRNA319  
TTCTGCACTTGGCTTGGGATCCGTGGCGA  
>NF1\_LsgRNA320  
AGTAGCAGAAACTGATTATGAAATGGGTGA  
>NF1\_LsgRNA321  
TCCAGCAGAGAAGCAATTCTGGCCTGGCAA  
>NF1\_LsgRNA322  
TTCAGCAGAGCGAACAAAAGTCCTAGGGCA  
>NF1\_LsgRNA323  
GGTGGCAGGAAACGTGGCATGTCTCGGAGG  
>NF1\_LsgRNA324  
CAGTGCAGGAGGGTAAGGAGATGTGGGAGT  
>NF1\_LsgRNA325  
GGAAGCAGTAGTTTCACTTCTAGCTGGTCT  
>NF1\_LsgRNA326  
TAATGCCAAACAGCAAGTAAAATTTGGGTA  
>NF1\_LsgRNA327  
TCAGGCCAACACTAAGAAGTTGCTTGGTTA  
>NF1\_LsgRNA328  
ATCTGCCACAGGTTTGTGCTCTGGAGGACC  
>NF1\_LsgRNA329  
AAAAGCCACCACCTAGAATCGAAAGGGGCT  
>NF1\_LsgRNA330  
GTCCGCCAGACCAGTCCCCGAGCCAGGAAA  
>NF1\_LsgRNA331  
TCTTGCCCAACTATAACACATTCATGGAGT  
>NF1\_LsgRNA332  
GCACGCCGCTCACCTTCATGCACCAGGAGT  
>NF1\_LsgRNA333  
TGTTGCCTCGGAAGAGAGTCTGCATGGAGT  
>NF1\_LsgRNA334  
TGGAGCCTCTCTCCGGAAGGGAAAAGGGAA  
>NF1\_LsgRNA335  
TGCAGCCTGAAGAAGGAGATGGTGTGGAAT  
>NF1\_LsgRNA336  
TAATGCGATATTGAGCAGTGTCCCAGGGAC  
>NF1\_LsgRNA337  
TAAAGCGATTGCTAGGCCCGGTATGGGTAA  
>NF1\_LsgRNA338  
CAAAGCTAACATGTTGCCAATCAGAGGATG

>NF1\_LsgRNA339  
CCAGGCTCATGGATTTCTGGCTCGGGGAC  
>NF1\_LsgRNA340  
CTCTGCTGGAGGCACACTCCCCAAGGGCA  
>NF1\_LsgRNA341  
CTAAGCTGGCTCTGCAGTGCAGGAGGGTAA  
>NF1\_LsgRNA342  
TTCTGCTGTACTGCCTTGGGTTTCGGGCCC  
>NF1\_LsgRNA343  
AATGGCTTACTTGGATTAAAAAGCAGGTTC  
>NF1\_LsgRNA344  
GTTAGCTTTGAAGTGGATCCTACCAGGTTT  
>NF1\_LsgRNA345  
GGCAGGAAACGTGGCATGTCTCGGAGGCTG  
>NF1\_LsgRNA346  
CTCTGGAACAATCAGGAGAAAATGGGCAG  
>NF1\_LsgRNA347  
CTTGGGAAGATACACATGCAAAATGGGAAC  
>NF1\_LsgRNA348  
TATAGGAAGGGTCACCATGATGAATGGGAT  
>NF1\_LsgRNA349  
GCTGGGAAGTTGCAAGTGAGGTCATGGAAT  
>NF1\_LsgRNA350  
TCATGGAATTAGAAAGGTTAAGGTTGGCAG  
>NF1\_LsgRNA351  
ACTTGGACAGCAGTAGAACCAACCTGGAAA  
>NF1\_LsgRNA352  
GGGAGGACATGGCCGCGCACAGGCCGGTGG  
>NF1\_LsgRNA353  
GCCTGGACATGGGGCAACCTTCTCAGGCCA  
>NF1\_LsgRNA354  
TCGGGGACTGGTCTGGCCGACAGTTGGATA  
>NF1\_LsgRNA355  
ATACGGAGACTATCTAAAGTATGCAGGTTT  
>NF1\_LsgRNA356  
CTTGGGAGTCAAAAACTTGCTGATGGTAT  
>NF1\_LsgRNA357  
CTCTGGAGTGGCACTGCAAGCAAATGGATC  
>NF1\_LsgRNA358  
CACCGGATATCTGCTTCCTCACAGAGGTGG  
>NF1\_LsgRNA359  
CTATGGATCCTCCTCCACTCACATGGGACA  
>NF1\_LsgRNA360  
TTATGGATCGGCTGTTGTCTTAATGGTGT

>NF1\_LsgRNA361  
CTCAGGATGAACTAGCTCGAGTTCTGGTTA  
>NF1\_LsgRNA362  
GGTAGGATGTGATATTCCTTCTAGTGGAAA  
>NF1\_LsgRNA363  
TCATGGATTTCTGGCTCGGGGACTGGTCT  
>NF1\_LsgRNA364  
AGATGGCAACACTTCTTGACATACCTGGGTC  
>NF1\_LsgRNA365  
GCCTGGCAACCTATAGCCCACCCATGGGTC  
>NF1\_LsgRNA366  
CAGTGGCACACACTTCGAAGTTGAGGGGGG  
>NF1\_LsgRNA367  
TGATGGCAGATACTGCTGTAGCTTTGGCTT  
>NF1\_LsgRNA368  
ATTGGGCAGTATCTTTCCAGCAACAGGTAA  
>NF1\_LsgRNA369  
GGCTGGCATCACTGAGGCACTGTACGGTCC  
>NF1\_LsgRNA370  
ACAGGGCCACTTCTAGTTTGGTCTGGGCTT  
>NF1\_LsgRNA371  
GCCAGGCCAGAATTGCTTCTCTGCTGGAGG  
>NF1\_LsgRNA372  
CGAGGGCCAGTTACTAGAGACATCAGGTTT  
>NF1\_LsgRNA373  
TTTTGGCCGAATCTTGGTGTGTTGGGGGAT  
>NF1\_LsgRNA374  
TCCAGGCTCATGGATTTCTGGCTCGGGGA  
>NF1\_LsgRNA375  
CAAAGGCTCCTAAAAGGCAAGAAATGGAAT  
>NF1\_LsgRNA376  
TGCAGGCTGACTGCCTCTTGAGAATGGCTT  
>NF1\_LsgRNA377  
TATTGGCTGATCGGTTTGGAGAGATTGGTGG  
>NF1\_LsgRNA378  
CTGTGGCTGTGCTGCAGCTTGATGAGGTCA  
>NF1\_LsgRNA379  
GACTGGCTTCCTTTGTGCCCTTGGGGGAGT  
>NF1\_LsgRNA380  
CTTTGGCTTCTGGAAATGTGAAATTGTTT  
>NF1\_LsgRNA381  
TCTGGGCTTGTTCGGCAAATCGGGGGGTTTC  
>NF1\_LsgRNA382  
CCTTGGCTTTAGAAGAGGACCTGAAGGTAT



>NF1\_LsgRNA383  
GGAAGGAAAAGGGAACCTCTCTATGGTCA  
>NF1\_LsgRNA384  
GCTTGGGAAGATACACATGCAAAAATGGGAA  
>NF1\_LsgRNA385  
CGCGGGGAGGACATGGCCGCGCACAGGCCG  
>NF1\_LsgRNA386  
GTCTGGGCTTGTCTGGCAAATCGGGGGGGTT  
>NF1\_LsgRNA387  
CCATGGGTCCAGTCAGTGAACGTAAGGGTT  
>NF1\_LsgRNA388  
GGAGGGTAAGGAGATGTGGGAGTCAGGAGG  
>NF1\_LsgRNA389  
CCGTGGTCAGCCGCTTCGACGAGCAGGTAA  
>NF1\_LsgRNA390  
CATGGGTCCAGTCAGTGAACGTAAGGGTTC  
>NF1\_LsgRNA391  
GACTGGTCTGGCCGACAGTTGGATAGGTGG  
>NF1\_LsgRNA392  
GGCCGGTGAATGGGTCCAGGCCGTGGTCA  
>NF1\_LsgRNA393  
TAATGGTGTGTAACCATGAGAAAGTGGGAC  
>NF1\_LsgRNA394  
TCTTGGTGTGTTGGGGGATAGAGTCGGGCT  
>NF1\_LsgRNA395  
TTAAGGTTGGCAGTGATACTAAGCTGGCTC  
>NF1\_LsgRNA396  
CCCCGTAAAAAAGGAGAAAGTGACAGGAAC  
>NF1\_LsgRNA397  
TACAGTAATTACCTTATTAAGAAGTGGCTG  
>NF1\_LsgRNA398  
ACATGTACAGGGCCACTTCTAGTTTGGTCT  
>NF1\_LsgRNA399  
CTACGTACTCCTGGAGCCTCTCTCCGGAAG  
>NF1\_LsgRNA400  
CTTAGTAGCACAGAAATTCTCAAGTGGTTG  
>NF1\_LsgRNA401  
AATTGTAGTGGACCTTACCCATACCGGGCC  
>NF1\_LsgRNA402  
ACTGGTCACAATGATGGGTGATCAAGGAGA  
>NF1\_LsgRNA403  
CTCTGTCAGCAATATGATGTCAACAGGTAA  
>NF1\_LsgRNA404  
CCATGTCCAGGCTCATGGATTTCTGGCTC

>NF1\_LsgRNA405  
TTCAGTCCATGGTGGTTGATCTTAAGGTAA  
>NF1\_LsgRNA406  
ACCAGTCCATGTGTGGAAGCTCTAAGGGAG  
>NF1\_LsgRNA407  
ACCTGTCCCGGTAAGTGAACGGAAGGCAA  
>NF1\_LsgRNA408  
TCAGGTCCTCTTCTAAAGCCAAGGTGGCAG  
>NF1\_LsgRNA409  
AAAAGTCTCTCTCATAGGAGCCAGGAGA  
>NF1\_LsgRNA410  
CAGTGTCTGAATCAAATGTTCTCTTGGATG  
>NF1\_LsgRNA411  
ATTTGTCTGACACAGACTCCCTACAGGAAT  
>NF1\_LsgRNA412  
TTTGGTCTGGGCTTGTCGGCAAATCGGGGG  
>NF1\_LsgRNA413  
GGGAGTCTGTGTCAGACAAATCTATGGATC  
>NF1\_LsgRNA414  
GCAAGTGAGGTCATGGAATTAGAAAGGTTA  
>NF1\_LsgRNA415  
GGATGTGATCACAATTCGTAATAAAGGATC  
>NF1\_LsgRNA416  
CCAAGTGCAGAAGCAAAGAAGCGCTGGCAG  
>NF1\_LsgRNA417  
ATGTGTGGAAGCTCTAAGGGAGAGCGGACC  
>NF1\_LsgRNA418  
CACTGTTACAGTGGCCAGTGGTAGGGGAGA  
>NF1\_LsgRNA419  
CGTTGTTACTTTCTTAGTAGCCACAGGTCC  
>NF1\_LsgRNA420  
CGCAGTTAGCAGTTATAAATAGCCTGGAAA  
>NF1\_LsgRNA421  
GAACGTTGAACTCTCCCCTACCACTGGCCA  
>NF1\_LsgRNA422  
CTCGGTTGAACTTCGAAATATGTTTGGTGA  
>NF1\_LsgRNA423  
CTCAGTTGATTATATTGGATACTGAGAAA  
>NF1\_LsgRNA424  
CTTGGTTGCAGGGATGGATTATATTGGAAT  
>NF1\_LsgRNA425  
ATCGGTTTGAGAGATTGGTGGAAGTGGTCA  
>NF1\_LsgRNA426  
ACAGGTTTGTGCTCTGGAGGACCCAGGTAT

>NF1\_LsgRNA427  
ATTTTAAAAAACCTACCGTAAACTCGGGTC  
>NF1\_LsgRNA428  
ACAATAAAGAGGGTGTGTGGCAGGGATA  
>NF1\_LsgRNA429  
ACCTTAAAGTGTGGTTGTTGTGAGGGCTT  
>NF1\_LsgRNA430  
TTTTTTAAATTAAAGGTACAAGTTAAGGCAC  
>NF1\_LsgRNA431  
CATTTAAATTTAAAGCCCTAAAGAAGGTTG  
>NF1\_LsgRNA432  
GGAATAAATTTCTTCTTAAAAATAAGGTAA  
>NF1\_LsgRNA433  
ATTCTAACGTGAGGTGTGGCTCATTTGGCTG  
>NF1\_LsgRNA434  
TCCTTAACTATCCAAAAGCCAAAATGGAAG  
>NF1\_LsgRNA435  
CTGCTAACTGCGCAACCTTCTTTAGGGCTT  
>NF1\_LsgRNA436  
CAGGTAAGATGTTTGGTATTGTGGTGGGGA  
>NF1\_LsgRNA437  
AAGTTAAGGCACACAGAAGATTATAGGCAG  
>NF1\_LsgRNA438  
GCTATAAGTATCTTCTTGTCCATGGTGA  
>NF1\_LsgRNA439  
TAATTAATTCTGCTGTACTGCCTTGGGTTT  
>NF1\_LsgRNA440  
TACTTACACAACAGGAAAGACTTTGGGAAA  
>NF1\_LsgRNA441  
CAGATACACCTGTCAGCAAATTTATGGATC  
>NF1\_LsgRNA442  
ATTATACATTTAAACTTACCCTTCAGGAGT  
>NF1\_LsgRNA443  
TCCTTACCAGCCATATCAGTCTGTGGGATC  
>NF1\_LsgRNA444  
GGCATACTCAGTGTTTCTGCAGTGGGAT  
>NF1\_LsgRNA445  
AGAATACCTGACAGACTGGGTTATGGGAAC  
>NF1\_LsgRNA446  
GACTTACCTGGCCATCTTCCATTTTGGCTT  
>NF1\_LsgRNA447  
CTTGTACCTTTAATTTAAAAATCGAGGGCC  
>NF1\_LsgRNA448  
ATTTTACTGGCCAAGCTGTTGCCTCGGAAG

>NF1\_LsgRNA449  
CTTTTACTGTAGCTTTATTTCAGTAGGGAGT  
>NF1\_LsgRNA450  
TATTTACTTTGCAGGTAAGATGTTTGGTAT  
>NF1\_LsgRNA451  
AATGTAGAAGGTGAATTCTGAGCCAGGCAG  
>NF1\_LsgRNA452  
ACTGTAGCTTTATTTCAGTAGGGAGTGGCAA  
>NF1\_LsgRNA453  
CAATTAGTTGAAGTAATGATGGCAAGGAGA  
>NF1\_LsgRNA454  
TCTATATAGGTATGTTTCGTGTGCTTGGGAA  
>NF1\_LsgRNA455  
CAAGTATCATGAGCGGCTGCTGACTGGCCT  
>NF1\_LsgRNA456  
CGGATATCTGCTTCCTCACAGAGGTGGCGG  
>NF1\_LsgRNA457  
TATTTATGGCAATCCGGAATCCTCTGGAGT  
>NF1\_LsgRNA458  
GAGATATCCAACGTGCAAGTGGCTGGACC  
>NF1\_LsgRNA459  
GACTTCAAATACGGACCAATGTTAAGGATC  
>NF1\_LsgRNA460  
CTCTTCACAAAAGAAGAACATATGCGGCCT  
>NF1\_LsgRNA461  
GCCCTCACAACAACCAACTTTAAGGTGA  
>NF1\_LsgRNA462  
GGGATCACAACACCCCCAAAATGAGGAGA  
>NF1\_LsgRNA463  
ACGTTCACTGACTGGACCCATGGGTGGGCT  
>NF1\_LsgRNA464  
CTAATCACTTACCCACTGAGAACAAGGAAC  
>NF1\_LsgRNA465  
TTGATCACTTGATATCAGACACAAAGGCTC  
>NF1\_LsgRNA466  
TCTGTCAGCTGCCTACTTCCTCCATGGCCA  
>NF1\_LsgRNA467  
AATTTTCATATGGCTTTGCATAATATGGCTT  
>NF1\_LsgRNA468  
AATTTTCATCTCTTGGCAAAATGAGAGGTCA  
>NF1\_LsgRNA469  
TCAGTCATCTGAAGGAGGTTCCGCTGGTTT  
>NF1\_LsgRNA470  
GAGGTCATGGAATTAGAAAGGTTAAGGTTG

>NF1\_LsgRNA471  
CCAGTCATGTTGATCCATTCTGTAGGGAG  
>NF1\_LsgRNA472  
CAATTCCACACCATCTCTTCTTCAGGCTG  
>NF1\_LsgRNA473  
TTCGTCCACTGTTACAGTGGCCAGTGGTAG  
>NF1\_LsgRNA474  
ATTGTCCAGTCTATCATTTCATATCCGGACC  
>NF1\_LsgRNA475  
AAACTCCATGAATGTGTTATAGTTGGGCAA  
>NF1\_LsgRNA476  
CCAGTCCATGTGTGGAAGCTCTAAGGGAGA  
>NF1\_LsgRNA477  
TTGATCCCAAGCCACCTGTTGCACTGGTTT  
>NF1\_LsgRNA478  
AGCATCCCACTGCAGGAAACACTGAGGTAT  
>NF1\_LsgRNA479  
TCTATCCCCCAACACACCAAGATTCGGCCA  
>NF1\_LsgRNA480  
GCTCTCCCTTAGAGCTTCCACACATGGACT  
>NF1\_LsgRNA481  
GCCTTCCGTTCCAGTTACCGGGACAGGTCA  
>NF1\_LsgRNA482  
TGGGTCTCCAGAGCACAAACCTGTGGCAG  
>NF1\_LsgRNA483  
ATGGTCTCTCCCAAAGGTTCTGAAGGATA  
>NF1\_LsgRNA484  
GTA CTCTGGAGCCTCTCTCCGGAAGGGAA  
>NF1\_LsgRNA485  
GATTTCTGGCTCGGGGACTGGTCTGGCCG  
>NF1\_LsgRNA486  
ACACTCCTGGTGCATGAAGGTGAGCGGCGT  
>NF1\_LsgRNA487  
GGTATCCTTCAGAACCTTTGGGAGAGGACC  
>NF1\_LsgRNA488  
TACATCGTCTACTCTGGAACAATCAGGAGA  
>NF1\_LsgRNA489  
TTTATCTAAAATCCCTGCTTCATACGGTGA  
>NF1\_LsgRNA490  
AAGCTCTAAGGGAGAGCGGACCTGTGGCTA  
>NF1\_LsgRNA491  
TTCATCTAATCTCATTGTGTCCTTTGGTTG  
>NF1\_LsgRNA492  
TGTATCTAGGGATCATAAAGCTGTTGGAAG

>NF1\_LsgRNA493  
TTTCTCTAGTCCGCATTGGATTGGTGGCCT  
>NF1\_LsgRNA494  
GCAATCTCTGGCATGTGTGACTGAGGGACC  
>NF1\_LsgRNA495  
TGTATCTGCCACAGGTTTGTGCTCTGGAGG  
>NF1\_LsgRNA496  
TTGGTCTGGGCTTGTCTGGCAAATCGGGGGG  
>NF1\_LsgRNA497  
CACCTCTGTGAGGAAGCAGATATCCGGTGT  
>NF1\_LsgRNA498  
CGCCTCTTAACAATGGTCTTGTGAAGGCTT  
>NF1\_LsgRNA499  
CACTTCTTCTTACTGATATTTCAATGGAAA  
>NF1\_LsgRNA500  
GCAGTCTTTAGTCGCATTTCTACCAGGTTA  
>NF1\_LsgRNA501  
GAATTCTTTATGAATACTTAGCAGAGGCCA  
>NF1\_LsgRNA502  
GCATTGAAACAATGATGTTAAATCTGGTCA  
>NF1\_LsgRNA503  
ACTTTGAACTGGTAAGGTTAAGGCTGGACC  
>NF1\_LsgRNA504  
GGTGTGAAGAAAATGGCAGATTTCTGGCAG  
>NF1\_LsgRNA505  
AATTTGAAGTGAATACACAGAGCGTGGCCT  
>NF1\_LsgRNA506  
ATGATGAATGGGATATGTATCCATAGGAAC  
>NF1\_LsgRNA507  
GTATTGAATTGAAACACCTTTGTTTGAAT  
>NF1\_LsgRNA508  
CATTTGACTGGTATTTCCACTAGAAGGAAT  
>NF1\_LsgRNA509  
GCATTGAGTAAGTTTGACATTGCAAGGACC  
>NF1\_LsgRNA510  
TGGTTGATGAAAACAACATGAATAAGGTAA  
>NF1\_LsgRNA511  
AGATTGATGCTGTGTATTGTCACTCGGTTG  
>NF1\_LsgRNA512  
ACTATGATTTACTGCATCACTTGTAGGACA  
>NF1\_LsgRNA513  
TCCTTGCAGAATCCAAGAAAACAGGGGCC  
>NF1\_LsgRNA514  
GCAGTGCAGGAGGTAAGGAGATGTGGGAG

>NF1\_LsgRNA515  
GATCTGCATGAATTAGTTTCACCATGGACA  
>NF1\_LsgRNA516  
CTGCTGCCACCTTGGCTTTAGAAGAGGACC  
>NF1\_LsgRNA517  
TCATTGCCTTCCGTTCCAGTTACCGGGACA  
>NF1\_LsgRNA518  
TGGTTGCGGGAAATATTGATCTGCAGGAAT  
>NF1\_LsgRNA519  
ATTCTGCTGTACTGCCTTGGGTTTCGGGCC  
>NF1\_LsgRNA520  
CCGATGCTGTTCTGAGGGAAACGCTGGCTA  
>NF1\_LsgRNA521  
TCCCTGCTTCATACGGTGAGACAATGGCAG  
>NF1\_LsgRNA522  
CATTTGCTTGCAGTGCCACTCCAGAGGATT  
>NF1\_LsgRNA523  
TACTTGCTTTACACAGTTTGACACAGGCAA  
>NF1\_LsgRNA524  
ACTCTGGAACAATCAGGAGAAAATTGGGCA  
>NF1\_LsgRNA525  
TGACTGGACCCATGGGTGGGCTATAGGTTG  
>NF1\_LsgRNA526  
TCTATGGATCCTCCTCCACTCACATGGGAC  
>NF1\_LsgRNA527  
TCCATGGATTGGATTTAACAAATTTGGATC  
>NF1\_LsgRNA528  
ACAGTGGCACACACTTCGAAGTTGAGGGGG  
>NF1\_LsgRNA529  
ACATTGGCCAGAGCCATCGCTATAGGGAGT  
>NF1\_LsgRNA530  
CTTTTGGCCGAATCTTGGTGTGTTGGGGGA  
>NF1\_LsgRNA531  
TGACTGGCTTCCTTTGTGCCCTTGGGGGAG  
>NF1\_LsgRNA532  
TGACTGGGAAATCTTACCTGTTGCTGGAAA  
>NF1\_LsgRNA533  
GGTCTGGGCTTGTCGGCAAATCGGGGGGGT  
>NF1\_LsgRNA534  
CCCATGGGTGGGCTATAGGTTGCCAGGCCA  
>NF1\_LsgRNA535  
CCACTGGTCCAGCCACTTGCACGTTGGAAT  
>NF1\_LsgRNA536  
GTTCTGGTTACTCTGTTTGATTCTCGGCAT

>NF1\_LsgRNA537  
TTATTGTCTCTATTAGTAAGACACTGGCAG  
>NF1\_LsgRNA538  
GAAATGTGAAATTGGTTTCAAGCAAGGTAA  
>NF1\_LsgRNA539  
CCACTGTTACAGTGGCCAGTGGTAGGGGAG  
>NF1\_LsgRNA540  
GGTATGTTTCGTGTGCTTGGGAATATGGTCC  
>NF1\_LsgRNA541  
AAGATGTTGTTCTAAAGTAGGAGTTGGAGA  
>NF1\_LsgRNA542  
CATCTGTTTGTCCACATTAGGCTTAGGTTA  
>NF1\_LsgRNA543  
TTTTTTAAAAAATTCAGGCTCTGCTGGTTC  
>NF1\_LsgRNA544  
CACCTTAAAGTGTGGTTGTTGTGAGGGCT  
>NF1\_LsgRNA545  
GGCTTTAAATTTAAATGCTGTTTCTGGAAA  
>NF1\_LsgRNA546  
GTAATTAATTCTGCTGTACTGCCTTGGGTT  
>NF1\_LsgRNA547  
ATACTTACACAACAGGAAAGACTTTGGGAA  
>NF1\_LsgRNA548  
CATTTTACATCATCATCTGCTGCTTGGTTT  
>NF1\_LsgRNA549  
TTGCTTACCTTGTCATTGAATATACGGAGA  
>NF1\_LsgRNA550  
ACATTTACTGACCTGGGGAATGCTGGGAAG  
>NF1\_LsgRNA551  
TCTTTTACTGTAGCTTTATTTCAGTAGGGAG  
>NF1\_LsgRNA552  
GGGCTTATACGAAAGCAAGAAACAAGGCAG  
>NF1\_LsgRNA553  
ATGATTATCTTTAATAGAGTCCAGAGGAAG  
>NF1\_LsgRNA554  
TAGGTTCAAACTGGTCAAATCAATGGTGA  
>NF1\_LsgRNA555  
TAACTTCAAGCCCCTTTCGATTCTAGGTGG  
>NF1\_LsgRNA556  
ATATTTCAATGGAAAATGTTCCCTATGGATA  
>NF1\_LsgRNA557  
ATTCTTCAATTTGTTAAATAGCATTGGATA  
>NF1\_LsgRNA558  
AGCCTTCACAAGACCATTGTTAAGAGGCGA



>NF1\_LsgRNA559  
CAGTTTCATCAAAACCAGTGCAACAGGTGG  
>NF1\_LsgRNA560  
TGTTTTTCATCTTTCAGGACACTAAAGGAGA  
>NF1\_LsgRNA561  
GATGTTCCCATAACCCAGTCTGTCAGGTAT  
>NF1\_LsgRNA562  
AAGATTTCGGCCAAAAGATGTCCCTGGGACA  
>NF1\_LsgRNA563  
GTTTTTCTCTAGTCCGCATTGGATTGGTGG  
>NF1\_LsgRNA564  
GGAATTCTGAGGAGGAACTGATGATGGCAT  
>NF1\_LsgRNA565  
CAGTTTCTGCTACTCTCCTCATTTTGGGGG  
>NF1\_LsgRNA566  
CAACTTCTTAGTGTTGGCCTGAGAAGGTTG  
>NF1\_LsgRNA567  
GTGGTTCTTTATTTATAGGCATTTTGGAAC  
>NF1\_LsgRNA568  
TGCCTTGATTGACACGTACCTGCCTGGAAT  
>NF1\_LsgRNA569  
TTCCTTGCAGAATCCAAGAAAACAGGGGCC  
>NF1\_LsgRNA570  
AAGGTTGCCCCATGTCCAGGCTCATGGATT  
>NF1\_LsgRNA571  
GAACTTGCTAGATAATCATACTGAAGGCAG  
>NF1\_LsgRNA572  
GCTCTTGCTGGCCATGGAGGAAGTAGGCAG  
>NF1\_LsgRNA573  
TTCTTTGCTTCTGCACTTGGCTTGCGGATC  
>NF1\_LsgRNA574  
GTGCTTGCTTTACATCGTCTACTCTGGAAC  
>NF1\_LsgRNA575  
CACATTGGCCAGAGCCATCGCTATAGGGAG  
>NF1\_LsgRNA576  
GCCATTGTCTCACCGTATGAAGCAGGGATT  
>NF1\_LsgRNA577  
CGAATTGTGATCACATCCTCTGATTGGCAA  
>NF1\_LsgRNA578  
CTATTTTAAAGAATGTTAACAATATGGTGA  
>NF1\_LsgRNA579  
GAATTTTACATACTACTAACTCTGGTTA  
>NF1\_LsgRNA580  
CACATTTACTGACCTGGGGAATGCTGGGAA

>NF1\_LsgRNA581  
 CTACTTTAGAACAAACATCTTATGTGGGATG  
 >NF1\_LsgRNA582  
 TTTTTTTCAGCTTCCAATAAAAAACAGGACA  
 >NF1\_LsgRNA583  
 TCATTTTCCTACTTGTTTCAGTCCATGGTGG  
 >NF1\_LsgRNA584  
 CCATTTTCTTCACACCTGTTCGTGAAGGAAA  
 >NF1\_LsgRNA585  
 CTGGTTTCTTCATCAATTCCAGGCAGGTAC  
 >NF1\_LsgRNA586  
 CGTATTTGAAGTCCCACTTTCTCATGGTTA  
 >NF1\_LsgRNA587  
 TACCTTTGAGCTAGTTCTGTCCACTGGTCC  
 >NF1\_LsgRNA588  
 TCATTTTGCCAAGAGATGAAATTTAGGTGA

(28)  $S_{11}^-$ : 178 low on-target activity sgRNAs targeting NF2

>NF2\_LsgRNA1  
 TCCGAAACATCTCGTACAGTGACAAGGAGG  
 >NF2\_LsgRNA2  
 CTTCAAAGAAGGCCACTCGGGACTTGGCGC  
 >NF2\_LsgRNA3  
 CCTCAAAGCTTCGTGTTAATAAGCTGGTAA  
 >NF2\_LsgRNA4  
 CTGAAAAGGCCAGATCACCGAGGAGGAGG  
 >NF2\_LsgRNA5  
 CCAAAAAATCCCCGCTTGTGAACACTGGGGT  
 >NF2\_LsgRNA6  
 TAATAAATCTGTATCAGATGACTCCGGAAA  
 >NF2\_LsgRNA7  
 GATAAAATTTGGCCAAGAAGTGAAAGGTGA  
 >NF2\_LsgRNA8  
 TCGAAAGACAGGCTGTCACCAATGAGGTTG  
 >NF2\_LsgRNA9  
 AGCGAAGAGCCAAGCAGAAGCTCCTGGAGA  
 >NF2\_LsgRNA10  
 GCCCAAGAGGAATTGCTTCCAAAAAGGGTA  
 >NF2\_LsgRNA11  
 CAAAAATCCCCGCTTGTGAACACTGGGGTC  
 >NF2\_LsgRNA12  
 TGGCAATCTCCAGGAGCTTCTGCTTGGCTC  
 >NF2\_LsgRNA13  
 GCACAATGAGAACTCCGACAGGGGTGGCAG

>NF2\_LsgRNA14  
TCACACAACATTTATTCTTCTTACAGGTAC  
>NF2\_LsgRNA15  
AAGAACCAGTCACCTTTCACTTCTTGGCCA  
>NF2\_LsgRNA16  
AAGGACCTCTTTGATTTGGTGTGCCGGACT  
>NF2\_LsgRNA17  
CCTCAGAAATCACCAGTGCTTCGTTGGCCA  
>NF2\_LsgRNA18  
CCCAAGAGGAATTGCTTCCAAAAAGGGTAA  
>NF2\_LsgRNA19  
CCAAAGAGGCAGATCAGCTGAAGCAGGACC  
>NF2\_LsgRNA20  
CTGAAGATGGCTGAGGAGTCAGAGAGGAGG  
>NF2\_LsgRNA21  
CTTCAGCATTCTCAGGATAAAAATTTGGCCA  
>NF2\_LsgRNA22  
TGAAAAGCCCAGGCCAGGGAGGAGAAGGCTA  
>NF2\_LsgRNA23  
AACCAGCTCCTCTTCAGCATTCTCAGGATA  
>NF2\_LsgRNA24  
AGACAGCTGACCTGTTGGCTGAAAAGGCCCC  
>NF2\_LsgRNA25  
AGCCAGGAGCACAGAAGCCTCAGGAGGGCA  
>NF2\_LsgRNA26  
ATCGAGGCCTTGAAACTGAAAGAGAGGGAG  
>NF2\_LsgRNA27  
GGAAAAGGAAGGACCTCTTTGATTTGGTGT  
>NF2\_LsgRNA28  
AATGAGGTTGAAGCTTGGTATGTCAGGAGG  
>NF2\_LsgRNA29  
AAGTAGTTCACACCGTACATCTCCAGGTCC  
>NF2\_LsgRNA30  
TGGAAGTTCAGCAGATGAAAGCCCAGGCCA  
>NF2\_LsgRNA31  
TGACATACCAAGCTTCAACCTCATTGGTGA  
>NF2\_LsgRNA32  
CTGTATCAGATGACTCCGGAAATGTGGGAG  
>NF2\_LsgRNA33  
AACCATGATCTATTTATGAGGAGAAGGAAA  
>NF2\_LsgRNA34  
TGGTATGTCAGGAGGCAACGGTGCTGGAAT  
>NF2\_LsgRNA35  
TTTCATTCCACGGGAAGGAGATCTTGGGGG

>NF2\_LsgRNA36  
AGTAATTCTCTCCTCCCACATTTCCGGAGT  
>NF2\_LsgRNA37  
TCTTATTGGATCCACAGAATAAAAAGGGCA  
>NF2\_LsgRNA38  
GCAGCAAGCACAATACCATTAAAAAGGTAC  
>NF2\_LsgRNA39  
GCATCAAGGCCACAGCGATTTCGCACGGAGG  
>NF2\_LsgRNA40  
TACACAATCAAGGACACAGTGGCCTGGCTC  
>NF2\_LsgRNA41  
TCTGCACAATGAGAACTCCGACAGGGGTGG  
>NF2\_LsgRNA42  
AGGGCACAGAGCTGCTGCTTGGAGTGGATG  
>NF2\_LsgRNA43  
AGGACACAGTGGCCTGGCTCAAAATGGACA  
>NF2\_LsgRNA44  
TACGCAGAGCACCGAGGCCGAGCCAGGTGA  
>NF2\_LsgRNA45  
GCCACAGATTCTCCAGCTATGTATCGGGAA  
>NF2\_LsgRNA46  
CAGCCATCTTCAGTGCCAGCACCTCGGCTT  
>NF2\_LsgRNA47  
AGCTCATGCGGGAAGCGATGGCCCCGGCCA  
>NF2\_LsgRNA48  
AGATCATGGTTCCCGATACATAGCTGGAGA  
>NF2\_LsgRNA49  
GCTGCATTTCTGCTCAGCCTCTGCGGCCT  
>NF2\_LsgRNA50  
CTCCCCACAGGGATGAAGCTGAAATGGAAT  
>NF2\_LsgRNA51  
GCTTCCAGCACCTTCTGCTCCATCAGGCGC  
>NF2\_LsgRNA52  
TTATCCAGTGGTTTAATAGTAAACTGGAAG  
>NF2\_LsgRNA53  
TCTTCCAGTTTACTATTAAACCACTGGATA  
>NF2\_LsgRNA54  
GGCCCCCAGGCTCACCGGGTACGTGGGCTT  
>NF2\_LsgRNA55  
TGGCCCCCAGGCTCACCGGGTACGTGGGCT  
>NF2\_LsgRNA56  
CTGACCCCCAAGATCTCCTTCCCGTGAAT  
>NF2\_LsgRNA57  
CGCTCCGCCTCGCGTGCTTCTGCAGGTCC

>NF2\_LsgRNA58  
CGGGCCTGAGCCCCGCGCCATGGCCGGGGC  
>NF2\_LsgRNA59  
AGCGCCTGATGGAGCAGAAGGTGCTGGAAG  
>NF2\_LsgRNA60  
TTGGCCTGGACGGCGTAAGAAGCCAGGAGC  
>NF2\_LsgRNA61  
TGCTCCTGGCTTCTTACGCCGTCCAGGCCA  
>NF2\_LsgRNA62  
ACTACGACCCCAGTGTTTACAAGCGGGGAT  
>NF2\_LsgRNA63  
TCACCGAGGAGGAGGCCAAAACCTTCTGGCCC  
>NF2\_LsgRNA64  
CGCACGAGGGATGAGTTGGAGAGGAGGCTG  
>NF2\_LsgRNA65  
AAGCCGAGGTGCTGGCACTGAAGATGGCTG  
>NF2\_LsgRNA66  
GCCTCGCTCGAGAGAAGCAGATGAGGGAGG  
>NF2\_LsgRNA67  
GCAACGGTGCTGGAATTGGGTTTTCATGGGCT  
>NF2\_LsgRNA68  
GGATCGTCACCATGGACGCCGAGATGGAGT  
>NF2\_LsgRNA69  
CTGGCTCAAATGGACAAGAAGGTTGGGCT  
>NF2\_LsgRNA70  
CCTGCTCAGCCTCTGCGGCCTTCTGGGCCA  
>NF2\_LsgRNA71  
CTGTCTCCCTCTCTTTTTCAGTTTCAAGGCCT  
>NF2\_LsgRNA72  
GGGGCTCCGAGAAACCTGGTTCTTTGGACT  
>NF2\_LsgRNA73  
TCTCCTCCTCCGTGCGAATCGCTGTGGCCT  
>NF2\_LsgRNA74  
TTACCTCGCAATTGAACTCCATCTCGGCGT  
>NF2\_LsgRNA75  
TTTGCTCTGCAATTCTGCAGGTACTGGATC  
>NF2\_LsgRNA76  
CGGACTCTGGGGCTCCGAGAAACCTGGTTC  
>NF2\_LsgRNA77  
AGAGCTCTTCAAAGAAGGCCACTCGGGACT  
>NF2\_LsgRNA78  
GGGCCTGAGCCCCGCGCCATGGCCGGGGCC  
>NF2\_LsgRNA79  
TCACCTGCTAGAGCTCTTCAAAGAAGGCCA

>NF2\_LsgRNA80  
TCATCTGCTGAACTTCCAAAGAATCGGCTT  
>NF2\_LsgRNA81  
GCTGCTGCTTGGAGTGGATGCCCTGGGGCT  
>NF2\_LsgRNA82  
TCAGCTGTCTCCTCAGACCGCATCTGGAGG  
>NF2\_LsgRNA83  
CCAGCTTATTAACACGAAGCTTTGAGGAGT  
>NF2\_LsgRNA84  
CCTGCTTCAGCTGATCTGCCTCTTTGGCCC  
>NF2\_LsgRNA85  
TGGCCTTCTTTGAAGAGCTCTAGCAGGTGA  
>NF2\_LsgRNA86  
TGTGCTTGCTGCTGCCACCCCTGTCGGAGT  
>NF2\_LsgRNA87  
GAAGCTTGGTATGTCAGGAGGCAACGGTGC  
>NF2\_LsgRNA88  
CATCCTTTCCTTGCAGGGCCAAAGAGGCAG  
>NF2\_LsgRNA89  
CCTGCTTCTAGCCTTCTCCTCCCTGGCCT  
>NF2\_LsgRNA90  
AACTGAAAGAGAGGGAGACAGCTCTGGATA  
>NF2\_LsgRNA91  
AATTGAACTCCATCTCGGCGTCCATGGTGA  
>NF2\_LsgRNA92  
AGCTGAAGCTCATGCGGGAAGCGATGGCCC  
>NF2\_LsgRNA93  
CCCAGAAGGCCGCAGAGGCTGAGCAGGAAA  
>NF2\_LsgRNA94  
CTACGACCCCAGTGTTTCAACAAGCGGGGATT  
>NF2\_LsgRNA95  
TGAGGAGAAGGAAAGCCGATTCTTTGGAAG  
>NF2\_LsgRNA96  
TCTTGAGAGAGCTGAAGCTCATGCGGGAAG  
>NF2\_LsgRNA97  
TCAGGAGGCAACGGTGCTGGAATTGGGTTC  
>NF2\_LsgRNA98  
TGCAGATGAAAGAAGAAGCAACAATGGCCA  
>NF2\_LsgRNA99  
AGCAGATGAAAGCCCAGGCCAGGGAGGAGA  
>NF2\_LsgRNA100  
ATCAGATGACTCCGGAATGTGGGAGGAGA  
>NF2\_LsgRNA101  
TTCTGCACAATGAGA ACTCCGACAGGGGTG

>NF2\_LsgRNA102  
GAACGCACGAGGGATGAGTTGGAGAGGAGG  
>NF2\_LsgRNA103  
TGGAGCAGAAGGTGCTGGAAGCCGAGGTGC  
>NF2\_LsgRNA104  
CCTTGACAGAGCGCCAAGTCCCGAGTGGCCT  
>NF2\_LsgRNA105  
TTCAGCAGATGAAAGCCCAGGCCAGGGAGG  
>NF2\_LsgRNA106  
TATTGCAGATGAAGTGGAAAGGGAAGGACC  
>NF2\_LsgRNA107  
CTGAGCAGGAAATGCAGCGCATCAAGGCCA  
>NF2\_LsgRNA108  
TTTGGCCAAGAAGTGAAAGGTGACTGGTTC  
>NF2\_LsgRNA109  
CCAGGCTCACCGGTACGTGGGCTTGGTGG  
>NF2\_LsgRNA110  
TCCTGCTCAGCCTCTGCGCCTTCTGGGCC  
>NF2\_LsgRNA111  
GATAGCTCAGGACCTGGAGATGTACGGTGT  
>NF2\_LsgRNA112  
TAGAGCTCTTCAAAGAAGGCCACTCGGGAC  
>NF2\_LsgRNA113  
AGCTGCTGCTTGGAGTGGATGCCCTGGGGC  
>NF2\_LsgRNA114  
AGGTGCTGGCACTGAAGATGGCTGAGGAGT  
>NF2\_LsgRNA115  
TACTGCTTGGTACGCAGAGCACCGAGGCCG  
>NF2\_LsgRNA116  
ACATGGAAAAGAGCAAGCATCTGCAGGAGC  
>NF2\_LsgRNA117  
TGCGGGAAGCGATGGCCCCGGCCATGGCGC  
>NF2\_LsgRNA118  
AGCAGGACCTGCAGGAAGCACGCGAGGCGG  
>NF2\_LsgRNA119  
CCAGGGAGGAGAAGGCTAGAAAGCAGGTGA  
>NF2\_LsgRNA120  
GCACGGAGGAGGAGAAGCGCCTGATGGAGC  
>NF2\_LsgRNA121  
GTCAGGAGGCAACGGTGCTGGAATTGGGTT  
>NF2\_LsgRNA122  
AGGAGGCAAACTTCTGGCCCAGAAGGCCG  
>NF2\_LsgRNA123  
TCAAGGCCACAGCGATTTCGCACGGAGGAGG

>NF2\_LsgRNA124  
AAAAGGCCAGATCACCGAGGAGGAGGCAA  
>NF2\_LsgRNA125  
AATGGCCTCACCTGGCTCGGCCTCGGTGC  
>NF2\_LsgRNA126  
TCGAGGCCTTGAAACTGAAAGAGAGGGAGA  
>NF2\_LsgRNA127  
ATGTGGGAGGAGAGAATTACTGCTTGGTAC  
>NF2\_LsgRNA128  
ATGAGGGAGGAGGCTGAACGCACGAGGGAT  
>NF2\_LsgRNA129  
AGAAGGTGCTGGAAGCCGAGGTGCTGGCAC  
>NF2\_LsgRNA130  
CAACGGTGCTGGAATTGGGTTTCATGGGCTG  
>NF2\_LsgRNA131  
TTGTGTACTGCAGTCCAAAGAACCAGGTTT  
>NF2\_LsgRNA132  
CAGGGTCATAAATGTGAAGCCCCAGGGCAT  
>NF2\_LsgRNA133  
TGCAGTCCAAAGAACCAGGTTTCTCGGAGC  
>NF2\_LsgRNA134  
TACGGTGTGAACTACTTTGCAATCCGGGTG  
>NF2\_LsgRNA135  
ATTGGTTTGTATTGCAGATGAAGTGAAA  
>NF2\_LsgRNA136  
TTTCTAGCCTTCTCCTCCCTGGCCTGGGCT  
>NF2\_LsgRNA137  
TCAGTATCTTTGAAGTCGAAAGACAGGCTG  
>NF2\_LsgRNA138  
TTGTTATTGCAGATGAAGTGAAAGGGAAG  
>NF2\_LsgRNA139  
GACTTCAAAGATACTGACATGAAGCGGCTT  
>NF2\_LsgRNA140  
CAGATCAGCTGAAGCAGGACCTGCAGGAAG  
>NF2\_LsgRNA141  
TCCCTCATCTGCTTCTCTCGAGCGAGGCGC  
>NF2\_LsgRNA142  
GCCCTCCTGAGGCTTCTGTGCTCCTGGCTT  
>NF2\_LsgRNA143  
TCGCTCGAGAGAAGCAGATGAGGGAGGAGG  
>NF2\_LsgRNA144  
CGCCTCGCTCGAGAGAAGCAGATGAGGGAG  
>NF2\_LsgRNA145  
TGTTTTCGGATTTTCATTCCACGGGAAGGAGA



>NF2\_LsgRNA146  
CCACTCGGGACTTGGCGCTCTGCAAGGTGA  
>NF2\_LsgRNA147  
CATCTCGTACAGTGACAAGGAGGTAGGACA  
>NF2\_LsgRNA148  
AACTTCTGGCCCAGAAGGCCGAGAGGCTG  
>NF2\_LsgRNA149  
TGGCTGAAAAGGCCAGATCACCGAGGAGG  
>NF2\_LsgRNA150  
AGGCTGAACGCACGAGGGATGAGTTGGAGA  
>NF2\_LsgRNA151  
TCAATGAACTCAAGACAGAAATCGAGGCCT  
>NF2\_LsgRNA152  
ACAATGAATGGGCCTCACCTGGCTCGGCCT  
>NF2\_LsgRNA153  
ATACTGACATGAAGCGGCTTTCCATGGAGA  
>NF2\_LsgRNA154  
ATCCTGAGAATGCTGAAGAGGAGCTGGTTC  
>NF2\_LsgRNA155  
CTCTTGAGAGAGCTGAAGCTCATGCGGGAA  
>NF2\_LsgRNA156  
GGCCTGAGCCCCGCGCCATGGCCGGGGCCA  
>NF2\_LsgRNA157  
CGCATGAGCTTCAGCTCTCTCAAGAGGAAG  
>NF2\_LsgRNA158  
GGTCTGAGGAGACAGCTGACCTGTTGGCTG  
>NF2\_LsgRNA159  
TCTTTGATTTGGTGTGCCGGACTCTGGGGC  
>NF2\_LsgRNA160  
ATTCTGCACAATGAGAACTCCGACAGGGGT  
>NF2\_LsgRNA161  
AGATTGCCACCAAGCCCACGTACCCGGTGA  
>NF2\_LsgRNA162  
ACTGTGCCCTCCAGATGCGGTCTGAGGAGA  
>NF2\_LsgRNA163  
CTCTTGCCGGCAGAGTGGAATACATGGAAA  
>NF2\_LsgRNA164  
AGAATGCTGAAGAGGAGCTGGTTCAGGAGA  
>NF2\_LsgRNA165  
CTGCTGCTTGGAGTGGATGCCCTGGGGCTT  
>NF2\_LsgRNA166  
TACGTGGGCTTGGTGGCAATCTCCAGGAGC  
>NF2\_LsgRNA167  
ACACTGGGGTCGTAGTCACCATACTGGAAA

>NF2\_LsgRNA168  
 TCCTTGTCACGTGACGAGATGTTTCGGATT  
 >NF2\_LsgRNA169  
 ACGGTGTGAACTACTTTGCAATCCGGGTGT  
 >NF2\_LsgRNA170  
 TTTGTTATTGCAGATGAAGTGGAAAGGGAA  
 >NF2\_LsgRNA171  
 TTTCTTCACCCCTCGCAGATGGAGCGGCAG  
 >NF2\_LsgRNA172  
 TTCATTCCACGGGAAGGAGATCTTGGGGGT  
 >NF2\_LsgRNA173  
 TTCCTTCTCCTCATAAATAGATCATGGTTC  
 >NF2\_LsgRNA174  
 TGGCTTCTTACGCCGTCCAGGCCAAGGTAG  
 >NF2\_LsgRNA175  
 GAGGTGAAGCTTGGTATGTCAGGAGGCAA  
 >NF2\_LsgRNA176  
 AGTTTTGCCTCCTCCTCGGTGATCTGGGCC  
 >NF2\_LsgRNA177  
 CTTATTGGATCCACAGAATAAAAAGGGCAC  
 >NF2\_LsgRNA178  
 GATCTTGGGGTTCAGTCTGTTCTCAGGGTC

(29)  $S_{12}^-$ : 191 low on-target activity sgRNAs targeting CD5

>CD5\_LsgRNA1  
 CAGAAAAAAAAAACTGCAACAAGAGGGTA  
 >CD5\_LsgRNA2  
 TCAGAAAAGCAGCGTCAGTGGATTGGCCC  
 >CD5\_LsgRNA3  
 CCAGAAAACAACGGCCAGGAGGGCGGCCA  
 >CD5\_LsgRNA4  
 TGGAAAACAGTGTGCAGTTCCAGTTGGAGG  
 >CD5\_LsgRNA5  
 TGGTAACACTGAGACAGCTTCTCCTGGGCA  
 >CD5\_LsgRNA6  
 CCCAAACCCAGCGGGCCTGGCCCCAGGCAC  
 >CD5\_LsgRNA7  
 AAACAACGGCCCAGGAGGGCGGCCAGGCGC  
 >CD5\_LsgRNA8  
 GGCCAAGGACAGGCCCTGGGCCTGGGGAA  
 >CD5\_LsgRNA9  
 CTACAAGGCCAAGGACAGGCCCTGGGCCT  
 >CD5\_LsgRNA10  
 GCCCAAGGTTTCAGAGCCGCTGGTCGGGGG

>CD5\_LsgRNA11  
GCTGAAGTGCGCCAGAGATCACAGTGGGAG  
>CD5\_LsgRNA12  
TCACACACACTGCTGCCCCGACCAGGCGG  
>CD5\_LsgRNA13  
GGTAACACTGAGACAGCTTCTCCTGGGCAC  
>CD5\_LsgRNA14  
TGAGACAGCTTCTCCTGGGCACAGAGGAAC  
>CD5\_LsgRNA15  
TGTGACAGTTCTGCAGCCAGGGGCCGGGA  
>CD5\_LsgRNA16  
TGCCACATACCTGCTGGGAACGCTGGGTGA  
>CD5\_LsgRNA17  
CCACACATGGCCAGCAGCACCACCAGGAGT  
>CD5\_LsgRNA18  
ACCCACCACCGTGCCGGAGCCCACAGGTAA  
>CD5\_LsgRNA19  
GGACACCAGCTCCTGCAGAGCTGAGGGACC  
>CD5\_LsgRNA20  
CCCCGACCAGGCGGCTCTGAACCTTGGGCTG  
>CD5\_LsgRNA21  
GAGCACCTCTTACCTGTGGGCTCCGGCAC  
>CD5\_LsgRNA22  
TCTTACCTGTGGGCTCCGGCACGGTGGTGG  
>CD5\_LsgRNA23  
GGGGACGGTGGGAAGAGCTATGTCGGGAGC  
>CD5\_LsgRNA24  
AGAGACTCACCCAGCGTTCCCAGCAGGTAT  
>CD5\_LsgRNA25  
ACTTACTGTTCTGGTTCACTCCTGTGGGGC  
>CD5\_LsgRNA26  
TACAAGAAGCTGGTGAAGAAATGTAGGTAC  
>CD5\_LsgRNA27  
GCCAAGACCCAAACCCAGCGGGCCTGGCCC  
>CD5\_LsgRNA28  
TTACAGATGAGGTTCCCCAGGCCAGGGGC  
>CD5\_LsgRNA29  
CCAGAGCAGATGACGGTGAGCGCTGGCCG  
>CD5\_LsgRNA30  
CTGCAGCCAGGGGCCGGGGACGGTGGGAAG  
>CD5\_LsgRNA31  
CTCCAGCTCCTCCCAGATTGCAGCTGGTGC  
>CD5\_LsgRNA32  
CACCAGCTGCAATCTGGGAGGAGCTGGAGA

>CD5\_LsgRNA33  
GCCAAGGACAGGCCCTGGGCTGGGGAAC  
>CD5\_LsgRNA34  
ACGAAGGCTGAGGTGCACAGGTGTGGTGG  
>CD5\_LsgRNA35  
ATGAAGGAAAGGACCAAGGGCCAAGGGGT  
>CD5\_LsgRNA36  
CCCAAGGTTTCAGAGCCGCTGGTCGGGGGC  
>CD5\_LsgRNA37  
CTGAAGTGCGCCAGAGATCACAGTGGGAGG  
>CD5\_LsgRNA38  
TGACAGTTCTGCAGCCAGGGCCGGGGACG  
>CD5\_LsgRNA39  
CGACATAGCTCTTCCCACCGTCCCCGGCCC  
>CD5\_LsgRNA40  
CATTATCACCCACCTAGGCAGATCAGGCTC  
>CD5\_LsgRNA41  
TCCCATCGAATTGGCAAGGGCTGGGGTCC  
>CD5\_LsgRNA42  
CCTCATCTGTAAGTCTCTGCAGTGTGGCTC  
>CD5\_LsgRNA43  
CAGGATGATGCTTGCCACAGTGCCTGGGGC  
>CD5\_LsgRNA44  
GTGGATGCTGACAAAACCTCCCCGGGTTC  
>CD5\_LsgRNA45  
CTTCATTGAACAGACCCCAGAACCAGGTCT  
>CD5\_LsgRNA46  
AGGCCAAGGACAGGCCCTGGGCTGGGGA  
>CD5\_LsgRNA47  
TCTACAAGGCCAAGGACAGGCCCTGGGCC  
>CD5\_LsgRNA48  
CTGCCACATACCTGCTGGGAACGCTGGGTG  
>CD5\_LsgRNA49  
GGGACACCAGCTCCTGCAGAGCTGAGGGAC  
>CD5\_LsgRNA50  
GTGGCACCATCCTCTACAAGGCCAAGGACA  
>CD5\_LsgRNA51  
CAACCACCCACCCACCACCGTGCCGGAGC  
>CD5\_LsgRNA52  
TGTGCACCTCAGGCCTTCGTGTCTGGCAC  
>CD5\_LsgRNA53  
AGGACACGAAGGCCTGAGGTGCACAGGTGT  
>CD5\_LsgRNA54  
CTTCCAGAAAACAACGGCCCAGGAGGGCGG

>CD5\_LsgRNA55  
ACCCCAGAACCAGGTCTTCTGCCAAGGATC  
>CD5\_LsgRNA56  
CCAGCAGCACTTCGTGGGAGTCCATGGATA  
>CD5\_LsgRNA57  
TCTGCAGCCAGGGGCCGGGGACGGTGGGAA  
>CD5\_LsgRNA58  
ATCTCAGCTGTTTGCACACTGCAGAGGCCT  
>CD5\_LsgRNA59  
AGTCCAGCTTACCAGAGCAGATGACGGTGA  
>CD5\_LsgRNA60  
TCCCCAGGCCAGGGGCCTGTCCCTGGCCT  
>CD5\_LsgRNA61  
ACCCCAGGCCCTTGCCAATTCGATGGGAGG  
>CD5\_LsgRNA62  
CGGACAGTCTGGAAGGGGTGGCCTAGGTAA  
>CD5\_LsgRNA63  
GTGACAGTTCTGCAGCCAGGGGCCGGGGAC  
>CD5\_LsgRNA64  
CGCACAGTTGCTGTGTGGCTTCGATGGAAA  
>CD5\_LsgRNA65  
GCATCATCCTGACCCTTGTACTCCTGGTGG  
>CD5\_LsgRNA66  
CTCCCATCGAATTGGCAAGGGCCTGGGGTC  
>CD5\_LsgRNA67  
AATTCCACCACACCTGTGCACCTCAGGCCT  
>CD5\_LsgRNA68  
AGCACCACCAGGAGTACAAGGGTCAGGATG  
>CD5\_LsgRNA69  
GCATCCACCGTGTGGAAGGAGATGAGGTCTG  
>CD5\_LsgRNA70  
GCTTCCAGAAAACAACGGCCCAGGAGGGCG  
>CD5\_LsgRNA71  
GACCCCAGGCCCTTGCCAATTCGATGGGAG  
>CD5\_LsgRNA72  
CCTCCCATCGAATTGGCAAGGGCCTGGGGT  
>CD5\_LsgRNA73  
AGGACCATTGAAAAATGCCCAGCAGGCCT  
>CD5\_LsgRNA74  
TCCTCCCAGATTGCAGCTGGTGCCAGGACA  
>CD5\_LsgRNA75  
CCTCCCCGGGTTCTCTGTGCCCAGGAGA  
>CD5\_LsgRNA76  
AGGCCCGAGCACCTCTTACCTGTGGGCTC

>CD5\_LsgRNA77  
GCGACCTCATCTCCTTCCACACGGTGGATG  
>CD5\_LsgRNA78  
AAGGCCTGAGGTGCACAGGTGTGGTGAAT  
>CD5\_LsgRNA79  
GTGTCCTGGCACCAGCTGCAATCTGGGAGG  
>CD5\_LsgRNA80  
CGCTCCTGGGAACACTTACTGTTCTGGTTC  
>CD5\_LsgRNA81  
TTCTCCTGGGCACAGAGGAACCCGGGGGAG  
>CD5\_LsgRNA82  
GCTCCGGCACGGTGGTGGGTGGGGTGGTTG  
>CD5\_LsgRNA83  
TGGTCGGGGCAGCAGTGTGTGTGAGGGCA  
>CD5\_LsgRNA84  
GCAGCGTCAGTGGATTGGCCCCACAGGAGT  
>CD5\_LsgRNA85  
AGAGCTATGTCGGGAGCAGCAGTGTGGCGA  
>CD5\_LsgRNA86  
GGATCTCCACTTGACCCTGACACTTGAAT  
>CD5\_LsgRNA87  
TGGGCTCCGGCACGGTGGTGGGTGGGGTGG  
>CD5\_LsgRNA88  
GCTTCTCCTGGGCACAGAGGAACCCGGGGG  
>CD5\_LsgRNA89  
CTGCCTCGGACAGTCTGGAAGGGGTGGCCT  
>CD5\_LsgRNA90  
GCTCCTGCAGAGCTGAGGGACCCCAGGCC  
>CD5\_LsgRNA91  
AGTTCTGCAGCCAGGGGCCGGGGACGGTGG  
>CD5\_LsgRNA92  
CTTTCTGCCTCGGACAGTCTGGAAGGGGTG  
>CD5\_LsgRNA93  
GGGCCTGGGGTCCCTCAGCTCTGCAGGAGC  
>CD5\_LsgRNA94  
ACATCTGTCCGGGACAGAGGCAGCAGGGAC  
>CD5\_LsgRNA95  
CTTACTGTTCTGGTTCCTCCTGTGGGGCC  
>CD5\_LsgRNA96  
CCCTCTTACCTGTGGGCTCCGGCACGGTGG  
>CD5\_LsgRNA97  
AGTGCTTCCAGAAAACAACGGCCCAGGAGG  
>CD5\_LsgRNA98  
GATCCTTGGCAGAAGACCTGGTTCTGGGGT

>CD5\_LsgRNA99  
GGCTCTTTCTTGACACATCTGTCCGGGACA  
>CD5\_LsgRNA100  
CATCGAAGCCACACAGCAACTGTGCGGTCC  
>CD5\_LsgRNA101  
GGTGAATTCTACAATGGCAGCTGGGGTGG  
>CD5\_LsgRNA102  
TCTTGACACATCTGTCCGGGACAGAGGCAG  
>CD5\_LsgRNA103  
CCCCGACCAGGCGGCTCTGAACCTTGGGCT  
>CD5\_LsgRNA104  
CGGGGACGGTGGGAAGAGCTATGTCGGGAG  
>CD5\_LsgRNA105  
CGGTGAGCGCCTGGCCGCCCTCCTGGGCCG  
>CD5\_LsgRNA106  
TACAGATGAGGTTCCCCAGGCCAGGGGCC  
>CD5\_LsgRNA107  
GGTGGATGCTGACAAAACCTCCCCGGGTT  
>CD5\_LsgRNA108  
GGATGATGCTTGCCACAGTGCCCTGGGGCCA  
>CD5\_LsgRNA109  
GCCAGCAGCACCACCAGGAGTACAAGGGTC  
>CD5\_LsgRNA110  
CCAGGCCCTTGCCAATTGATGGGAGGCC  
>CD5\_LsgRNA111  
CGGGGCCTCCCATCGAATTGGCAAGGGCCT  
>CD5\_LsgRNA112  
AGGGGCCTGTCCTTGGCCTTGTAGAGGATG  
>CD5\_LsgRNA113  
AAGTGCGCCAGAGATCACAGTGGGAGGCC  
>CD5\_LsgRNA114  
CCAGGCGCTCACCGTCATCTGCTCTGGTAA  
>CD5\_LsgRNA115  
GTGGGCTCCGGCACGGTGGTGGGTGGGGTG  
>CD5\_LsgRNA116  
TGCTGCTGGCCATGTGTGGTCCCTCTGGTCT  
>CD5\_LsgRNA117  
GCCCGCTGGGTTTGGGTCTTGGCCTGGATA  
>CD5\_LsgRNA118  
AGCGGCTTTCTGCCTCGGACAGTCTGGAAG  
>CD5\_LsgRNA119  
TGGTGAATTCTACAATGGCAGCTGGGGTG  
>CD5\_LsgRNA120  
CCATGGACTCCCACGAAGTGCTGCTGGCTG

>CD5\_LsgRNA121  
CCTGGGCACAGAGGAACCCGGGGGAGGTTT  
>CD5\_LsgRNA122  
ATGTGGCAGCCAGCAGCACTTCGTGGGAGT  
>CD5\_LsgRNA123  
TCCAGGCCAAGACCCAAACCCAGCGGGCCT  
>CD5\_LsgRNA124  
GCCAGGCCCGCTGGGTTTGGGTCTTGGCCT  
>CD5\_LsgRNA125  
TCGGGGCCTCCCATCGAATTGGCAAGGGCC  
>CD5\_LsgRNA126  
ACCAGGCGGCTCTGAACCTTGGGCTGGAAA  
>CD5\_LsgRNA127  
TGTGGGCTCCGGCACGGTGGTGGGTGGGGT  
>CD5\_LsgRNA128  
CCCTGGCTGCAGAACTGTCACACAGGGCCT  
>CD5\_LsgRNA129  
ACTTGGGACCGCACAGTTGCTGTGTGGCTT  
>CD5\_LsgRNA130  
CCTGGGGCCAGGCCCGCTGGGTTTGGGTCT  
>CD5\_LsgRNA131  
CACAGGGCCTCCCCTGTGATCTCTGGCGC  
>CD5\_LsgRNA132  
GCCTGGGGCCAGGCCCGCTGGGTTTGGGTC  
>CD5\_LsgRNA133  
GGTCGGGGGCAGCAGTGTGTGTGAGGGCAT  
>CD5\_LsgRNA134  
TTGTGGGTGGAGGTGTCGTTCTCTGGGGCT  
>CD5\_LsgRNA135  
GCTGGGGTGGCACCATCCTCTACAAGGCCA  
>CD5\_LsgRNA136  
TGTGGGTGGAGGTGTCGTTCTCTGGGGCTC  
>CD5\_LsgRNA137  
GCACGGTGGTGGGTGGGGTGGTTGTGGGTG  
>CD5\_LsgRNA138  
CCAAGGTTTCAGAGCCGCTGGTCGGGGGCA  
>CD5\_LsgRNA139  
GTTTCGTCAGAAAAAGCAGCGTCAGTGGATT  
>CD5\_LsgRNA140  
TTTTGTCAGCATCCACCGTGTGGAAGGAGA  
>CD5\_LsgRNA141  
AATGGTCCTGGCTCAGCCTCCAACCTGGAAC  
>CD5\_LsgRNA142  
TGTAGTGAGACACAGCTCCCGTTCGGGGCC



>CD5\_LsgRNA143  
CACAGTGCCTGGGGCCAGGCCCGCTGGGTT  
>CD5\_LsgRNA144  
ACCTGTGGGCTCCGGCACGGTGGTGGGTGG  
>CD5\_LsgRNA145  
GGTGGTGGGTGGGGTGGTTGTGGGTGGAGG  
>CD5\_LsgRNA146  
CCTGGTGGTGCTGCTGGCCATGTGTGGTCC  
>CD5\_LsgRNA147  
CACGGTGGTGGGTGGGGTGGTTGTGGGTGG  
>CD5\_LsgRNA148  
CCCTGTGTGACAGTTCTGCAGCCAGGGGCC  
>CD5\_LsgRNA149  
CAAGGTTCAAGCCGCCTGGTCGGGGGCAG  
>CD5\_LsgRNA150  
CTGTTCAATGAAGGGAAAGGACCAAGGGCC  
>CD5\_LsgRNA151  
CTTTTCCACAGCGGCTTTCTGCCTCGGACA  
>CD5\_LsgRNA152  
GGGGTCCCTCAGCTCTGCAGGAGCTGGTGT  
>CD5\_LsgRNA153  
ACCATCCTCTACAAGGCCAAGGACAGGCCC  
>CD5\_LsgRNA154  
GTGGTCCTCTGGTCTACAAGAAGCTGGTGA  
>CD5\_LsgRNA155  
CGTGTCTTGGCACCAGCTGCAATCTGGGAG  
>CD5\_LsgRNA156  
CTTCTCCTGGGCACAGAGGAACCCGGGGGA  
>CD5\_LsgRNA157  
GCTTTCTGCCTCGGACAGTCTGGAAGGGGT  
>CD5\_LsgRNA158  
TGGCTCTTTCTTGACACATCTGTCCGGGAC  
>CD5\_LsgRNA159  
CTTGTGAACTTGTGTTGTTGCAGTTGGATA  
>CD5\_LsgRNA160  
GTAGTGAGACACAGCTCCCGTTCGGGGCCT  
>CD5\_LsgRNA161  
ACGGTGAGCGCCTGGCCGCCCTCCTGGGCC  
>CD5\_LsgRNA162  
AGGATGATGCTTGCCACAGTGCTGGGGCC  
>CD5\_LsgRNA163  
TGTTTGCACACTGCAGAGGCCTGCTGGGCA  
>CD5\_LsgRNA164  
CTGGTGCCAGGACACGAAGGCCTGAGGTGC

>CD5\_LsgRNA165  
TTTCTGCCTCGGACAGTCTGGAAGGGGTGG  
>CD5\_LsgRNA166  
ACAGTGCCTGGGGCCAGGCCCGCTGGGTTT  
>CD5\_LsgRNA167  
GTGGTGAATTCTACAATGGCAGCTGGGGT  
>CD5\_LsgRNA168  
GAATTGGAGCCACTTAGCATCACCTGGATA  
>CD5\_LsgRNA169  
TCCTTGGCAGAAGACCTGGTTCTGGGGTCT  
>CD5\_LsgRNA170  
TAAGTGGCTCCAATTCCAAGTGCAGGGTC  
>CD5\_LsgRNA171  
CCCCTGGCTGCAGAAGTGCACACAGGGCC  
>CD5\_LsgRNA172  
GTTGTGGGTGGAGGTGTCGTTCTCTGGGGC  
>CD5\_LsgRNA173  
CCCTTGTACTCCTGGTGGTGCTGCTGGCCA  
>CD5\_LsgRNA174  
CTGGTGTCCCTGCTGCCTCTGTCCCGGACA  
>CD5\_LsgRNA175  
CATCTGTCCGGGACAGAGGCAGCAGGGACA  
>CD5\_LsgRNA176  
CCTGTGTGACAGTTCTGCAGCCAGGGGCCG  
>CD5\_LsgRNA177  
TACCTGTGGGCTCCGGCACGGTGGTGGGTG  
>CD5\_LsgRNA178  
GAGATGTGGTGACCCCTTGGCCCTTGGTCC  
>CD5\_LsgRNA179  
GCCCTGTGTGACAGTTCTGCAGCCAGGGGC  
>CD5\_LsgRNA180  
TTACTGTTCTGGTTCACTCCTGTGGGGCCA  
>CD5\_LsgRNA181  
CCAATTCCAAGTGTGAGGGTCAAGTGGAGA  
>CD5\_LsgRNA182  
GCAGTCCAGTTGGAGGCTGAGCCAGGACC  
>CD5\_LsgRNA183  
GCTCTTCCCACCGTCCCCGGCCCCCTGGCTG  
>CD5\_LsgRNA184  
CCAATTCGATGGGAGGCCCGAACGGGAGC  
>CD5\_LsgRNA185  
CCCGTTCGGGGCCTCCCATCGAATTGGCAA  
>CD5\_LsgRNA186  
GGAATTCACAATGGCAGCTGGGGTGGCAC

>CD5\_LsgRNA187  
 TCCTTTCTGCAGATTTCCAGCCCAAGGTTC  
 >CD5\_LsgRNA188  
 CTGGTTCTGGGGTCTGTTCAATGAAGGGAA  
 >CD5\_LsgRNA189  
 CCACTTGACCCTGACACTTGGAAATTGGAGC  
 >CD5\_LsgRNA190  
 ATGCTTGCCACAGTGCCTGGGGCCAGGCC  
 >CD5\_LsgRNA191  
 ATCCTTGGCAGAAGACCTGGTTCTGGGGTC

(30)  $S_{13}^-$ : 59 low on-target activity sgRNAs targeting CD28

>CD28\_LsgRNA1  
 AACGAAACAGTGACGTTCCGTCTCTGGAAT  
 >CD28\_LsgRNA2  
 TGGTAAAGCAGTCGCCCCTGCTTGTGGTAG  
 >CD28\_LsgRNA3  
 CTGCAAAGTCTCTGGCAGGGGCGTAGGGCT  
 >CD28\_LsgRNA4  
 CATGAACATGACTCCCCGGAGGCCTGGGCT  
 >CD28\_LsgRNA5  
 TGCAAAGTCTCTGGCAGGGGCGTAGGGCTG  
 >CD28\_LsgRNA6  
 CTCGAATGCCGAGTTCAACTGCGACGGGGA  
 >CD28\_LsgRNA7  
 ATGAACATGACTCCCCGGAGGCCTGGGCTC  
 >CD28\_LsgRNA8  
 TACAACCTTCTCGCAAAGGAATTCCGGGCA  
 >CD28\_LsgRNA9  
 AGCAACGAGGTCAGCCTCAGCTGCAGGTAT  
 >CD28\_LsgRNA10  
 CGGTACGCTGCAAAGTCTCTGGCAGGGGCG  
 >CD28\_LsgRNA11  
 AGTGACTACATGAACATGACTCCCCGGAGG  
 >CD28\_LsgRNA12  
 TTGAACTCGGCATTCGAGCGAAACTGGGGC  
 >CD28\_LsgRNA13  
 GAACAGCGACGTGGAAGTCTGTGTCGGGAA  
 >CD28\_LsgRNA14  
 ACTCAGTCATCTCCTAAGCTGTTTTGGGCA  
 >CD28\_LsgRNA15  
 TGACAGTGGCTCTTTGTGTTATCTGGGTAA  
 >CD28\_LsgRNA16  
 CTGGATAGGGTCCCTGTTCAGGGGCGGTAC

>CD28\_LsgRNA17  
CGAAATCCCCGTCGCAGTTGAACTCGGCAT  
>CD28\_LsgRNA18  
TCGAATGCCGAGTTCAACTGCGACGGGGAT  
>CD28\_LsgRNA19  
AGGAATTCGGGCATCCCTGTACAAGGGCG  
>CD28\_LsgRNA20  
TGTACAAGGGCGTGAACAGCGACGTGGAAG  
>CD28\_LsgRNA21  
GTGACAGTGGCTCTTTGTGTTATCTGGGTA  
>CD28\_LsgRNA22  
GTTCCATTGCTCCTCTCGTTGTCTAGGTAA  
>CD28\_LsgRNA23  
TTCCCCCCTAGACAAATAGTAGAAGGAAC  
>CD28\_LsgRNA24  
GATGCCCGGAATTCCTTTGCGAGAAGGTTG  
>CD28\_LsgRNA25  
TTTTCCCTTCAGAAAACAAGATTTTGGTAA  
>CD28\_LsgRNA26  
ACAACCTTCTCGCAAAGGAATTCCGGGCAT  
>CD28\_LsgRNA27  
CATTTCGAGCGAAACTGGGGCTGATAGGTAA  
>CD28\_LsgRNA28  
CTTTCGAGTGAGCCCAGGCCTCCGGGGAGT  
>CD28\_LsgRNA29  
TTCACGCCCTTGTACAGGGATGCCCGGAAT  
>CD28\_LsgRNA30  
CCTCCGCCTTACCTAGACAACGAGAGGAGC  
>CD28\_LsgRNA31  
GGTACGCTGCAAAGTCTCTGGCAGGGGCGT  
>CD28\_LsgRNA32  
ACGTCGCTGTTACGCCCTTGTACAGGGAT  
>CD28\_LsgRNA33  
ACCTCGTTGCTATCTACCACAAGCAGGGGC  
>CD28\_LsgRNA34  
GTCACTAGCAAGCCATAACAAAACAGGACT  
>CD28\_LsgRNA35  
ATTGCTCCTCTCGTTGTCTAGGTAAGGCGG  
>CD28\_LsgRNA36  
TGAACTCGGCATTCGAGCGAAACTGGGGCT  
>CD28\_LsgRNA37  
AAGTCTCTGGCAGGGGCGTAGGGCTGGTAA  
>CD28\_LsgRNA38  
CTTTGCAGCGTACCGCCCCTGACAGGGACC

>CD28\_LsgRNA39  
 TCTGGCAGGGGCGTAGGGCTGGTAAGGCTT  
 >CD28\_LsgRNA40  
 AACAGCGACGTGGAAGTCTGTGTCGGGAAT  
 >CD28\_LsgRNA41  
 AGGGGCGGTACGCTGCAAAGTCTCTGGCAG  
 >CD28\_LsgRNA42  
 CGTCGCTGTTACGCCCTTGTACAGGGATG  
 >CD28\_LsgRNA43  
 CAATGGAACTATTATTACATAAAAAGGTAA  
 >CD28\_LsgRNA44  
 CGACGTGGAAGTCTGTGTCGGGAATGGGAA  
 >CD28\_LsgRNA45  
 GTCTGTTCCCTTCTACTATTTGTCTAGGGGG  
 >CD28\_LsgRNA46  
 CTGGTAAGGCTTTCGAGTGAGCCCAGGCCT  
 >CD28\_LsgRNA47  
 GCGGTACGCTGCAAAGTCTCTGGCAGGGGC  
 >CD28\_LsgRNA48  
 GCTTTCGAGTGAGCCCAGGCCTCCGGGGAG  
 >CD28\_LsgRNA49  
 CCTCTCGTTGTCTAGGTAAGGCGGAGGGTA  
 >CD28\_LsgRNA50  
 ACTTTGCAGCGTACCGCCCCTGACAGGGAC  
 >CD28\_LsgRNA51  
 CGAATGCCGAGTTCAACTGCGACGGGGATT  
 >CD28\_LsgRNA52  
 GACGTGGAAGTCTGTGTCGGGAATGGGAAT  
 >CD28\_LsgRNA53  
 CTTCTGGATAGGGGTCCCTGTCAGGGGCGG  
 >CD28\_LsgRNA54  
 GTTTTGGGCACTGGTCGTGGTTGCTGGAGT  
 >CD28\_LsgRNA55  
 GTCATGTTTATGTAGTCACTTTGAAGGAGT  
 >CD28\_LsgRNA56  
 TTTGTTATGGCTTGCTAGTGACAGTGGCTC  
 >CD28\_LsgRNA57  
 GGTATTCCTACAACCTTCTCGCAAAGGAAT  
 >CD28\_LsgRNA58  
 GGAATTCCTTTGCGAGAAGGTTGTAGGAAT  
 >CD28\_LsgRNA59  
 GGCTTTCGAGTGAGCCCAGGCCTCCGGGGA

(31)  $S_{14}^-$ : 135 low on-target activity sgRNAs targeting H2-K

>H2-K\_LsgRNA1  
CACCAAACACAAGTGGGAGCAGGCTGGTGA  
>H2-K\_LsgRNA2  
CCAGAACAGCAACGGTCGCCATGTTGGAGA  
>H2-K\_LsgRNA3  
CGCCAACAGCAGGAGCAGCGTGCACGGTAC  
>H2-K\_LsgRNA4  
CGGGAACGCGACGCTGCTGCGCACAGGTGC  
>H2-K\_LsgRNA5  
TGAAAACGTGGACGGCGGCGGACATGGCGG  
>H2-K\_LsgRNA6  
GATGAAGATGAGAAGGAGAAACACAGGTAG  
>H2-K\_LsgRNA7  
CTCCAAGGACAACCAGAACAGCAACGGTCG  
>H2-K\_LsgRNA8  
CTGCAATAGTCACTGGAGCTGTGGTGGCTT  
>H2-K\_LsgRNA9  
GGAGACAGTGGATGGAGGAGGCTCTGGGAA  
>H2-K\_LsgRNA10  
TTACACATGCCATGTGTACCATCAGGGGCT  
>H2-K\_LsgRNA11  
CAGGACATGGAGCTTGTGGAGACCAGGCCT  
>H2-K\_LsgRNA12  
CATCACCTGACCTGGCAGTTGAATGGGGA  
>H2-K\_LsgRNA13  
AGTCACCCTGAGGTGCTGGGCCCTGGGCTT  
>H2-K\_LsgRNA14  
AAATACCTCAGCGAGTGTGGGCCTGGGGGC  
>H2-K\_LsgRNA15  
GGTGACGAAATACCTCAGCGAGTGTGGGCC  
>H2-K\_LsgRNA16  
AGCCACTCCACGCACGTGCCCTCCAGGTAG  
>H2-K\_LsgRNA17  
ACGAAGACCTGAAAACGTGGACGGCGGCGG  
>H2-K\_LsgRNA18  
AGAGAGACTCAGGGCCTACCTGGAGGGCAC  
>H2-K\_LsgRNA19  
GAGCAGAGTTTCCGAGTGGACCTGAGGACC  
>H2-K\_LsgRNA20  
ATGGAGCAGGAGGGGCCCGAGTATTGGGAG  
>H2-K\_LsgRNA21  
TAGAAGCCCAGGGCCCAGCACCTCAGGGTG  
>H2-K\_LsgRNA22  
TCGCAGCCGTCGTAGGCGTACTGCTGGTAC

>H2-K\_LsgRNA23  
TGCCAGGTCAGGGTGATGTCAGCAGGGTAG  
>H2-K\_LsgRNA24  
TTGTAGTAGCCGAGCAGGGTCCTCAGGTCC  
>H2-K\_LsgRNA25  
TGGAAGTCGGCTACGTGGACGACACGGAGT  
>H2-K\_LsgRNA26  
GAAGATAAAGTCACCCTGAGGTGCTGGGCC  
>H2-K\_LsgRNA27  
CTTTATCTTCAGGTCTGCTGTGATGGGTCA  
>H2-K\_LsgRNA28  
TGTGATGGGTCACATGGGCCTTTGGGGAAT  
>H2-K\_LsgRNA29  
CGCCATGTTGGAGACAGTGGATGGAGGAGG  
>H2-K\_LsgRNA30  
AGGTATTTTCGTCACCGCCGTGTCCCGGCC  
>H2-K\_LsgRNA31  
CTCTCACACTATTCAGGTGATCTCTGGCTG  
>H2-K\_LsgRNA32  
ATTACACATGCCATGTGTACCATCAGGGGC  
>H2-K\_LsgRNA33  
AAGTCACCCTGAGGTGCTGGGCCCTGGGCT  
>H2-K\_LsgRNA34  
ACTCCACGCACGTGCCCTCCAGGTAGGCC  
>H2-K\_LsgRNA35  
CGTGCACGCTGCTCCTGCTGTTGGCGGCCG  
>H2-K\_LsgRNA36  
CCCACACTCTCCTTACCCCATCTCAGGGTG  
>H2-K\_LsgRNA37  
CTGCCAGGTCAGGGTGATGTCAGCAGGGTA  
>H2-K\_LsgRNA38  
GCTCCAGTGACTATTGCAGCTCCAAGGACA  
>H2-K\_LsgRNA39  
GAGACAGTGGATGGAGGAGGCTCTGGGAAG  
>H2-K\_LsgRNA40  
ACCCCATCTCAGGGTGAGGGGCTCAGGCAG  
>H2-K\_LsgRNA41  
TGGGCATCTGTGGTGGTGCCTCTTGGGAAG  
>H2-K\_LsgRNA42  
TACACATGCCATGTGTACCATCAGGGGCTG  
>H2-K\_LsgRNA43  
CCAACATGGCGACCGTTGCTGTTCTGGTTG  
>H2-K\_LsgRNA44  
GGCACCACCACAGATGCCCACTTCTGGAAG

>H2-K\_LsgRNA45  
CCTTCCAGAAGTGGGCATCTGTGGTGGTGC  
>H2-K\_LsgRNA46  
GGAGCCAGGGCGGCCGCAACAGCAGGAGC  
>H2-K\_LsgRNA47  
CCTCCCATTCAACTGCCAGGTCAGGGTGA  
>H2-K\_LsgRNA48  
CCGCCCCAGGCCACACTCGCTGAGGTAT  
>H2-K\_LsgRNA49  
TCCTCCCATTCAACTGCCAGGTCAGGGTG  
>H2-K\_LsgRNA50  
GCTCCCCGAGGCCGGGCCGGGACACGGCGG  
>H2-K\_LsgRNA51  
GGTACCCGCGGAGGAGTCGCCCGTCGGACC  
>H2-K\_LsgRNA52  
ATCACCTGACCTGGCAGTTGAATGGGGAG  
>H2-K\_LsgRNA53  
GGGTCCGACGGGCGACTCCTCCGCGGGTAC  
>H2-K\_LsgRNA54  
ACCGCCGTGTCCCGGCCCGCCCTCGGGGAG  
>H2-K\_LsgRNA55  
CCGGCCTCGGGGAGCCCCGGTACATGGAAG  
>H2-K\_LsgRNA56  
AAGACCTGAAAACGTGGACGGCGGCGACA  
>H2-K\_LsgRNA57  
TCACCCTGACCTGGCAGTTGAATGGGGAGG  
>H2-K\_LsgRNA58  
TGCTCCTGCTGTTGGCGGCCCGCCCTGGCTC  
>H2-K\_LsgRNA59  
CTCTCCTTACCCCATCTCAGGGTGAGGGGC  
>H2-K\_LsgRNA60  
AATCCGAGATATGAGCCGCGGGCGCGGTGG  
>H2-K\_LsgRNA61  
GTCCCGCAGGCTCTCACACTATTCAGGTGA  
>H2-K\_LsgRNA62  
CCACCGCGCCCGCGGCTCATATCTCGGATT  
>H2-K\_LsgRNA63  
CCC CGCGGGTCTGAGTCGGAGCCAGGGCG  
>H2-K\_LsgRNA64  
CGGGCGCGGTGGATGGAGCAGGAGGGGCC  
>H2-K\_LsgRNA65  
TGCTCGGCTACTACAACCAGAGCAAGGGCG  
>H2-K\_LsgRNA66  
GGAGCGGGAGACACAGAAAGCCAAGGGCAA



>H2-K\_LsgRNA67  
AGTTTCGTGCGCTTCGACAGCGACGCGGAGA  
>H2-K\_LsgRNA68  
CCGCCGTGTCCCGGCCCGCCTCGGGGAGC  
>H2-K\_LsgRNA69  
GGGCTACCTGGAGGGCACGTGCGTGGAGT  
>H2-K\_LsgRNA70  
GCACCTCAGGGTGACTTTATCTTCAGGTCT  
>H2-K\_LsgRNA71  
GTGGCTCCGCAGATACCTGAAGAACGGGAA  
>H2-K\_LsgRNA72  
TCAGCTCCTCCCCATTCAACTGCCAGGTCA  
>H2-K\_LsgRNA73  
CTGCCTGAGCCCCTCACCTGAGATGGGGT  
>H2-K\_LsgRNA74  
CAGGCTGGTGAAGCAGAGAGACTCAGGGCC  
>H2-K\_LsgRNA75  
TCTCCTTACCCCATCTCAGGGTGAGGGGCT  
>H2-K\_LsgRNA76  
GAACCTTCCAGAAGTGGGCATCTGTGGTGG  
>H2-K\_LsgRNA77  
TGTCCCTTGAGCTGCAATAGTCACTGGAGC  
>H2-K\_LsgRNA78  
GGAGCTTGTGGAGACCAGGCCTGCAGGGGA  
>H2-K\_LsgRNA79  
CGGAGAATCCGAGATATGAGCCGCGGGCGC  
>H2-K\_LsgRNA80  
AGTTGAATGGGGAGGAGCTGATCCAGGACA  
>H2-K\_LsgRNA81  
TGTGGAGACCAGGCCTGCAGGGGATGGAAC  
>H2-K\_LsgRNA82  
CGGGGAGCCCCGGTACATGGAAGTCGGCTA  
>H2-K\_LsgRNA83  
GCCTGAGCCCCTCACCTGAGATGGGGTAA  
>H2-K\_LsgRNA84  
AGCTGATCCAGGACATGGAGCTTGTGGAGA  
>H2-K\_LsgRNA85  
CTGTGATGGGTACATGGGCCTTTGGGGAA  
>H2-K\_LsgRNA86  
GGGCGATGTAATCGCAGCCGTCGTAGGCGT  
>H2-K\_LsgRNA87  
TCAGGCAGCCCCTGATGGTACACATGGCAT  
>H2-K\_LsgRNA88  
TGGAGCAGGAGGGGCCCGAGTATTGGGAGC

>H2-K\_LsgRNA89  
GTGGGCATCTGTGGTGGTGCCCTCTTGGGAA  
>H2-K\_LsgRNA90  
GGTCGCCATGTTGGAGACAGTGGATGGAGG  
>H2-K\_LsgRNA91  
AGAAGCCCAGGGCCCAGCACCTCAGGGTGA  
>H2-K\_LsgRNA92  
CACCGCCGTGTCCCGGCCCGCCTCGGGGA  
>H2-K\_LsgRNA93  
AGCAGCGTCGCGTTCCCGTTCTTCAGGTAT  
>H2-K\_LsgRNA94  
CCTGGCTCCGACTCAGACCCGCGCGGGTGA  
>H2-K\_LsgRNA95  
TCCCGGCCCGGTACTCACCCGCGCGGGTCT  
>H2-K\_LsgRNA96  
GCTCGGCTACTACAACCAGAGCAAGGGCGG  
>H2-K\_LsgRNA97  
CTCTGGCTGTGAAGTGGGGTCCGACGGGCG  
>H2-K\_LsgRNA98  
ACCGGGGCTCCCCGAGGCCGGGCCGGGACA  
>H2-K\_LsgRNA99  
GTGAGGGGCTCAGGCAGCCCCTGATGGTAC  
>H2-K\_LsgRNA100  
CAACGGTCGCCATGTTGGAGACAGTGGATG  
>H2-K\_LsgRNA101  
TTCAGGTGATCTCTGGCTGTGAAGTGGGGT  
>H2-K\_LsgRNA102  
GGAAGGTTCCATCCCCTGCAGGCCTGGTCT  
>H2-K\_LsgRNA103  
CCATGTACCGGGGCTCCCCGAGGCCGGGCC  
>H2-K\_LsgRNA104  
TTTCGTCACCGCCGTGTCCCGGCCCGGCCT  
>H2-K\_LsgRNA105  
TGATGTCAGCAGGGTAGAAGCCCAGGGCCC  
>H2-K\_LsgRNA106  
TCAGGTCTGCTGTGATGGGTCACATGGGCC  
>H2-K\_LsgRNA107  
TCAGGTGATCTCTGGCTGTGAAGTGGGGTC  
>H2-K\_LsgRNA108  
TACCGTGCACGCTGCTCCTGCTGTTGGCGG  
>H2-K\_LsgRNA109  
CCGAGTGGACCTGAGGACCCTGCTCGGCTA  
>H2-K\_LsgRNA110  
AAACGTGGACGGCGGCGGACATGGCGGCGC

>H2-K\_LsgRNA111  
GACCGTTGCTGTTCTGGTTGTCCTTGGAGC  
>H2-K\_LsgRNA112  
AAGATAAAGTCACCCTGAGGTGCTGGGCCC  
>H2-K\_LsgRNA113  
CATGTACCGGGGCTCCCCGAGGCCGGGCCG  
>H2-K\_LsgRNA114  
GAAATACCTCAGCGAGTGTGGGCCTGGGGG  
>H2-K\_LsgRNA115  
ACTTTATCTTCAGGTCTGCTGTGATGGGTC  
>H2-K\_LsgRNA116  
GTACTCACCCGCGCGGGTCTGAGTCGGAGC  
>H2-K\_LsgRNA117  
CTCCTCCATCCACTGTCTCCAACATGGCGA  
>H2-K\_LsgRNA118  
GCGTTCCCGTTCTTCAGGTATCTGCGGAGC  
>H2-K\_LsgRNA119  
GGGGTCCGACGGGCGACTCCTCCGCGGGTA  
>H2-K\_LsgRNA120  
TGGCTCCGCAGATACCTGAAGAACGGGAAC  
>H2-K\_LsgRNA121  
CTGGTCTCCACAAGCTCCATGTCCTGGATC  
>H2-K\_LsgRNA122  
TTGCTCTGGTTGTAGTAGCCGAGCAGGGTC  
>H2-K\_LsgRNA123  
GCCCTGAACGAAGACCTGAAAACGTGGACG  
>H2-K\_LsgRNA124  
TGCCTGAGCCCCTCACCTGAGATGGGGTA  
>H2-K\_LsgRNA125  
GATATGAGCCGCGGGCGCGGTGGATGGAGC  
>H2-K\_LsgRNA126  
CAGGTGATCTCTGGCTGTGAAGTGGGGTCC  
>H2-K\_LsgRNA127  
GCTGTGATGGGTCACATGGGCCTTTGGGGA  
>H2-K\_LsgRNA128  
GAGCTGCAATAGTCACTGGAGCTGTGGTGG  
>H2-K\_LsgRNA129  
CTCCTGCTCCATCCACCGCGCCCGCGGCTC  
>H2-K\_LsgRNA130  
CTTCTGGAAGGTTCCATCCCCTGCAGGCCT  
>H2-K\_LsgRNA131  
TACCTGGAGGGCACGTGCGTGGAGTGGCTC  
>H2-K\_LsgRNA132  
CATCTGTGGTGGTGCCTCTTGGGAAGGAGC

>H2-K\_LsgRNA133  
 CTCCTTACCCCATCTCAGGGTGAGGGGCTC  
 >H2-K\_LsgRNA134  
 CATGTTGGAGACAGTGGATGGAGGAGGCTC  
 >H2-K\_LsgRNA135  
 GAGCTTGTGGAGACCAGGCCTGCAGGGGAT

(32)  $S_{15}^-$ : 210 low on-target activity sgRNAs targeting CD45

>CD45\_LsgRNA1  
 ATACAAAAGGAAGATTGCTGATGAGGGCAG  
 >CD45\_LsgRNA2  
 CCAGAAACGCCTAAGCCTAGTTGTGGGGAT  
 >CD45\_LsgRNA3  
 AAGGAAAGCAGACTTATGGAGACATGGAAG  
 >CD45\_LsgRNA4  
 AGCAAAAAGGCCACAGTTATTGTCATGGTCA  
 >CD45\_LsgRNA5  
 TCCAAAATGCTAAGTGTGGAAATGAGGATT  
 >CD45\_LsgRNA6  
 TTCCAACAAAATGTCAGAATGGATTGGCTC  
 >CD45\_LsgRNA7  
 GATGAACAACAGGAACTCGTTGAAAGGGGT  
 >CD45\_LsgRNA8  
 CAGGAACCCCATGGTCTGGCCAGCTGGTGA  
 >CD45\_LsgRNA9  
 CAAGAAGAAAATAAGAAGAAGAACAGGAAT  
 >CD45\_LsgRNA10  
 CTA AAAAGAAACGATCGGTGACTTTTGGCAG  
 >CD45\_LsgRNA11  
 GGCCAAGCATGGAGGAAGGCACTCGGGCTT  
 >CD45\_LsgRNA12  
 TGGAAAGTGCAGAAACAGAAGATGTGGTTG  
 >CD45\_LsgRNA13  
 CCTGAATCATAGACACCAGGTCTTTGGGTT  
 >CD45\_LsgRNA14  
 TGTCAATGGGAAGATTCAAAGAAATGGGAC  
 >CD45\_LsgRNA15  
 ATGAACAACAGGAACTCGTTGAAAGGGGTG  
 >CD45\_LsgRNA16  
 AGGCACAGAACAACCCTGTCTGCTGGGATC  
 >CD45\_LsgRNA17  
 AGGCACAGTATATCCTGATTCATCAGGCTT  
 >CD45\_LsgRNA18  
 AGCTACCACAACGAAGCAAACATGTGGTAA

>CD45\_LsgRNA19  
ACTTACCACATGTTTGCTTCGTTGTGGTAG  
>CD45\_LsgRNA20  
AGACACCAGGTCTTTGGGTTCTGCAGGCAG  
>CD45\_LsgRNA21  
GTGTACCAGTACCAGTGTACCACATGGAAA  
>CD45\_LsgRNA22  
CAGTACCAGTGTACCACATGGAAAAGGGGAA  
>CD45\_LsgRNA23  
ATCCACCCAGTGACCCCTCCCCTCTGGAGG  
>CD45\_LsgRNA24  
CCTCACCTGCTCCTCAAACCTTCGACGGAGA  
>CD45\_LsgRNA25  
TGCTACCTGGTATTTCAGCCTCCAGAGGGGA  
>CD45\_LsgRNA26  
CTCTACGCAAAGCACGGCCTGGGGTGGTGT  
>CD45\_LsgRNA27  
TTATACTATTGTCTGTGCGCCGGGAGGTTT  
>CD45\_LsgRNA28  
GCAGACTGTTCTGGCTGAATTCAGGTAT  
>CD45\_LsgRNA29  
AACCAGAAATGATGATTGCTGCTCAGGGGC  
>CD45\_LsgRNA30  
AGAGAGAAATTGACATTCACCTGGTGGTAC  
>CD45\_LsgRNA31  
CTGTAGAACAAGTGCGCAGAATACTGGCCA  
>CD45\_LsgRNA32  
CCAAAAGACCTGGTGTCTATGATTCAGGACC  
>CD45\_LsgRNA33  
TGACAGAGATGGATCCCAGCAGACAGGGTT  
>CD45\_LsgRNA34  
TCATAGAGGAACCTGGTATTGCTCCTGGTGA  
>CD45\_LsgRNA35  
CTCCAGAGGGGAGGGGTCACTGGGTGGATC  
>CD45\_LsgRNA36  
TGACAGAGTTAGTGAATGGAGACCAGGTTT  
>CD45\_LsgRNA37  
TTACAGATGATGAAAAGCAGCTGATGGATG  
>CD45\_LsgRNA38  
G TTCAGCTTCTGAATGATGTAATCAGGACA  
>CD45\_LsgRNA39  
ACCCAGGAAATACATTGCTGCACAAGGTAA  
>CD45\_LsgRNA40  
ATCTAGGAAGTCTGTGCTCAGTACTGGGGC

>CD45\_LsgRNA41  
TTTGAGGAGCAGGTGAGGGTCTTCAGGAAC  
>CD45\_LsgRNA42  
TCACAGGGAAGAATGTCAACATAACGGTTT  
>CD45\_LsgRNA43  
CAGAAATCATCAACTGTCTCATCCCGGGGC  
>CD45\_LsgRNA44  
TAAAAGTCTGATTACTAGATTCATAGGTGT  
>CD45\_LsgRNA45  
ACAGAGTGCCACTTAAGCATGAACTGGAGA  
>CD45\_LsgRNA46  
CAAAAGTTCGGAGAGTGTAGGCTGAGGCTC  
>CD45\_LsgRNA47  
CAGGAGTTGGAGGACACAGCACATTGGAAA  
>CD45\_LsgRNA48  
TGTTATAAATGTGCAGACAGATTTGGGGAG  
>CD45\_LsgRNA49  
GCTAATACTTCAATTTGTTTGGAGTGGAAA  
>CD45\_LsgRNA50  
CCCCATCAGCTTCCTAACCTGCAGTGGACG  
>CD45\_LsgRNA51  
CTGAATCATAGACACCAGGTCTTTGGGTTC  
>CD45\_LsgRNA52  
CTTCATCCCTTCTGGGGAAGCCTTGGGAAG  
>CD45\_LsgRNA53  
GCTCATCTCCAGTTCATGCTTAAGTGGCAC  
>CD45\_LsgRNA54  
TATGATCTGCGCAAGAAAAGATCCAGGTAA  
>CD45\_LsgRNA55  
GTTGATGACTTCTGGAGGATGATCTGGGAG  
>CD45\_LsgRNA56  
CGGGATGAGACAGTTGATGACTTCTGGAGG  
>CD45\_LsgRNA57  
GTCAATGGGAAGATTCAAAGAAATGGGACT  
>CD45\_LsgRNA58  
TGTCATGGTCACACGATGTGAAGAAGGAAA  
>CD45\_LsgRNA59  
GTCTATGGTTATGTTGTCAAGCTAAGGCGA  
>CD45\_LsgRNA60  
AGTAATGTTCCCAAACATGGCAGCTGGAAA  
>CD45\_LsgRNA61  
TGTGATGTTGACAGAGTTAGTGAATGGAGA  
>CD45\_LsgRNA62  
ATACATTACTTACATCAATGTAGCTGGCAT

>CD45\_LsgRNA63  
TGGTATTCAGCCTCCAGAGGGGAGGGGTCA  
>CD45\_LsgRNA64  
TTTTATTCTGATTGTGGGGCTTTCGGGCAT  
>CD45\_LsgRNA65  
CATACAAAAGGAAGATTGCTGATGAGGGCA  
>CD45\_LsgRNA66  
GTGACAAAGACTTCTGTGTCCAGAAGGGCA  
>CD45\_LsgRNA67  
TGAACAACAGGAACTCGTTGAAAGGGGTGA  
>CD45\_LsgRNA68  
CCCACAAC TAGGCTTAGGCGTTTCTGGAAC  
>CD45\_LsgRNA69  
GCTGCAAGAAAAACGTTAGTCTCTTGGCCT  
>CD45\_LsgRNA70  
TGGCCAAGCATGGAGGAAGGCACTCGGGCT  
>CD45\_LsgRNA71  
GTTTCAAGCTTTCACCTCAAACTGGTCA  
>CD45\_LsgRNA72  
AAGGCACAGAACAACCCTGTCTGCTGGGAT  
>CD45\_LsgRNA73  
AATTCACAGTAATGTTCCCAAACATGGCAG  
>CD45\_LsgRNA74  
AATTCACCAGCTGGCCAGACCATGGGGTTC  
>CD45\_LsgRNA75  
GTCACACGATGTGAAGAAGGAAACAGGGTA  
>CD45\_LsgRNA76  
TCTCCAGATATGACCATGGGTTTGTGGCTC  
>CD45\_LsgRNA77  
TTCACAGCAATTTAGATGAACAACAGGAAC  
>CD45\_LsgRNA78  
CACCCAGTGACCCCTCCCCTCTGGAGGCTG  
>CD45\_LsgRNA79  
CATTCATACCTGAAAGATGTCAGTTGGACA  
>CD45\_LsgRNA80  
CATGCATCCATCCTCGTCCACTGCAGGTTA  
>CD45\_LsgRNA81  
ACTTCATCCCTTCTGGGGAAGCCTTGGGAA  
>CD45\_LsgRNA82  
CCTACATTGGAATTGATGCCATGCTGGAAG  
>CD45\_LsgRNA83  
TCCTCATTTCCACACTTAGCATTTTGGACA  
>CD45\_LsgRNA84  
TATTCCACTAAAGCCTGATGAATCAGGATA

>CD45\_LsgRNA85  
ACATCCACTTTGCCCTCTGCTTCCAGGCCT  
>CD45\_LsgRNA86  
TCTTCCCATTTGACATAGGCAAGTAGGGACA  
>CD45\_LsgRNA87  
TCTTCCCCTTTCCATGTGGTACACTGGTAC  
>CD45\_LsgRNA88  
GTGTCCCTACTTGCCTATGTCAATGGGAAG  
>CD45\_LsgRNA89  
CCTCCCCTCTGGAGGCTGAATACCAGGTAG  
>CD45\_LsgRNA90  
AGGACCTCAAACAGAAGCTTCCCAAGGCTT  
>CD45\_LsgRNA91  
ATATCCTGATTCATCAGGCTTTAGTGAAT  
>CD45\_LsgRNA92  
GAAGCCTTGGGAAGCTTCTGTTTGAGGTCC  
>CD45\_LsgRNA93  
CCGTGGAAGTTTGAGGAGCAGGTGAGGGTC  
>CD45\_LsgRNA94  
AGCCCGAGTGCCTTCCTCCATGCTTGGCCA  
>CD45\_LsgRNA95  
CTGGCGATGATGTCATAGAGGAAGTGGTAT  
>CD45\_LsgRNA96  
AGTGCGCAGAATACTGGCCAAGCATGGAGG  
>CD45\_LsgRNA97  
TCTGCTACACATGTGTAATTTGTTGGGCA  
>CD45\_LsgRNA98  
TCAGCTCAAAAGTTCGGAGAGTGTAGGCTG  
>CD45\_LsgRNA99  
GTGACTCATATCCAATTCACCAGCTGGCCA  
>CD45\_LsgRNA100  
CAGCCTCCAGAGGGGAGGGGTCACTGGGTG  
>CD45\_LsgRNA101  
AAGTCTCTACGCAAAGCACGGCCTGGGGTG  
>CD45\_LsgRNA102  
GGATCTCTCTTCTTCATGTTGTGTAGGCAT  
>CD45\_LsgRNA103  
CATGCTGGAAGGCCTGGAAGCAGAGGGCAA  
>CD45\_LsgRNA104  
TACACTGGTACTGGTACACAGTTCTGGGCT  
>CD45\_LsgRNA105  
CTACCTGGTATTCAGCCTCCAGAGGGGAGG  
>CD45\_LsgRNA106  
TCAACTGTCTCATCCCGGGGCCCTAGGAGT



>CD45\_LsgRNA107  
TGTTCTGTGCCTTGTTCAATCTCTTGAAA  
>CD45\_LsgRNA108  
TTTTCTTAGAGACTTCCTTCATACAGGAGT  
>CD45\_LsgRNA109  
GAAGCTTCCCAAGGCTTCCCCAGAAGGGAT  
>CD45\_LsgRNA110  
GCAACTTCTTCAGTGGTCCCATTGTGGTGC  
>CD45\_LsgRNA111  
TCCAGAAACGCCTAAGCCTAGTTGTGGGGA  
>CD45\_LsgRNA112  
ACCAGAAATGATGATTGCTGCTCAGGGGCC  
>CD45\_LsgRNA113  
CTAGGAAGTCTGTGCTCAGTACTGGGGCGA  
>CD45\_LsgRNA114  
CGTCGAAGTTTGAGGAGCAGGTGAGGGTCT  
>CD45\_LsgRNA115  
TCTGGACACAGAAGTCTTTGTACAGGTAA  
>CD45\_LsgRNA116  
TAGGGACACTTCATAGTATTTATAAGGTTT  
>CD45\_LsgRNA117  
AGCAGACTTATGGAGACATGGAAGTGGAGA  
>CD45\_LsgRNA118  
TAGAGACTTCCTTCATACAGGAGTTGGAGG  
>CD45\_LsgRNA119  
TTTTGAGCTGAGACATTCCAAGGTAGGTAA  
>CD45\_LsgRNA120  
TCTGGAGGATGATCTGGGAGCAAAAGGCCA  
>CD45\_LsgRNA121  
AGCAGAGGGCAAAGTGGATGTCTATGGTTA  
>CD45\_LsgRNA122  
CAAAGATGTCCAAAATGCTAAGTGTGAAA  
>CD45\_LsgRNA123  
AGATGCAGACTCAGGTTTAGATACAGGCTC  
>CD45\_LsgRNA124  
AGCTGCCTGCAGAACCCAAAGACCTGGTGT  
>CD45\_LsgRNA125  
CCATGCTGGAAGGCCTGGAAGCAGAGGGCA  
>CD45\_LsgRNA126  
TCTAGGAAGTCTGTGCTCAGTACTGGGGCG  
>CD45\_LsgRNA127  
CATTGGAATTGATGCCATGCTGGAAGGCCT  
>CD45\_LsgRNA128  
CAAAGGATGCATTAATGTATTTGCTGGTTT

>CD45\_LsgRNA129  
TTCTGGCCTTTGGATTTGCCCTTCTGGACA  
>CD45\_LsgRNA130  
CTGGGGCGAAGGAAAGCAGACTTATGGAGA  
>CD45\_LsgRNA131  
AAAAGGCTAATACTTCAATTTGTTTGGAGT  
>CD45\_LsgRNA132  
GTGGGGCTTTCGGGCATCTTTGATGGGAAA  
>CD45\_LsgRNA133  
TGTTGGGCGTACAGGTACCTACATTGGAAT  
>CD45\_LsgRNA134  
TGTGGGGCTTTCGGGCATCTTTGATGGGAA  
>CD45\_LsgRNA135  
CCATGGGTTTGTGGCTCAAACCTTCTGGCCT  
>CD45\_LsgRNA136  
ATGTGGTCCTCCTTATGAAACTAATGGCCC  
>CD45\_LsgRNA137  
TTGAGGTCCTGAATCATAGACACCAGGTCT  
>CD45\_LsgRNA138  
CCATGGTCTGGCCAGCTGGTGAATTGGATA  
>CD45\_LsgRNA139  
CAATGTAGCTGGCATTATGTAGGTGGACC  
>CD45\_LsgRNA140  
CCTGGTATTCAGCCTCCAGAGGGGAGGGGT  
>CD45\_LsgRNA141  
AGAAGTCATCAACTGTCTCATCCCGGGGCC  
>CD45\_LsgRNA142  
CTGTGTCCAGAAGGGCAAATCCAAAGGCCA  
>CD45\_LsgRNA143  
AGTGGTCCCATTTGTGGTGCACCTGCAGGTAA  
>CD45\_LsgRNA144  
CTGTGTCCTCCAACCTCCTGTATGAAGGAAG  
>CD45\_LsgRNA145  
GCTTGTGATACTTCATCCCTTCTGGGGAAG  
>CD45\_LsgRNA146  
CCGTGTGGAACCTCTCTGAAATAAATGGAGA  
>CD45\_LsgRNA147  
GAGTGTGGGTACCTACCATCACAAAGGATG  
>CD45\_LsgRNA148  
GTTTGTTCCTTAGTGCTGGTGTGGGCGT  
>CD45\_LsgRNA149  
ATGCTAAAGCACTGATTATATTCCTGGTGT  
>CD45\_LsgRNA150  
GTGGTAAAGTCTCTACGCAAAGCACGGCCT

>CD45\_LsgRNA151  
GCATTAACTCTCCGTCTCGAAGTTTGAGGAGC  
>CD45\_LsgRNA152  
CTGCTACACATGTGTAATTTGTTTGGGCAC  
>CD45\_LsgRNA153  
CCAGTACCAGTGTACCACATGGAAAGGGGA  
>CD45\_LsgRNA154  
TCTTTACCTGCAGTGCACCACAATGGGACC  
>CD45\_LsgRNA155  
AGAATACTGGCCAAGCATGGAGGAAGGCAC  
>CD45\_LsgRNA156  
TGAGTAGAAAAAAGAAAAAGCAACTGGAAG  
>CD45\_LsgRNA157  
ATGTTATAAATGTGCAGACAGATTTGGGGA  
>CD45\_LsgRNA158  
CATTTATACTATTGTCTGTCTGGCCGGGAGG  
>CD45\_LsgRNA159  
TTCATATGTACTCCACTGTGAGCCAGGTAC  
>CD45\_LsgRNA160  
CTGGTATTCAGCCTCCAGAGGGGAGGGGTC  
>CD45\_LsgRNA161  
TTTTTATTCTGATTGTGGGGCTTTCGGGCA  
>CD45\_LsgRNA162  
CACCTCAAACTGGTCACATTATTAGGCAA  
>CD45\_LsgRNA163  
AAGGTCAATGGAATGAAAACCTCCCGGCCG  
>CD45\_LsgRNA164  
GATGTCACAATAATCAGAAACACCAGGAAT  
>CD45\_LsgRNA165  
CAATTCACCAGCTGGCCAGACCATGGGGTT  
>CD45\_LsgRNA166  
CACTTCACCTCGGATTGCAGAGGAAGGAGC  
>CD45\_LsgRNA167  
AGACTCAGTTTTAGATACAGGCTCAGGCCA  
>CD45\_LsgRNA168  
AGCCTCCAGAGGGGAGGGGTCACTGGGTGG  
>CD45\_LsgRNA169  
ATCTTCCCATTGACATAGGCAAGTAGGGAC  
>CD45\_LsgRNA170  
AGTGTCCCTACTTGCCTATGTCAATGGGAA  
>CD45\_LsgRNA171  
ACTCTCCGTCTCGAAGTTTGAGGAGCAGGTGA  
>CD45\_LsgRNA172  
AGTCTCTACGCAAAGCACGGCCTGGGGTGG

>CD45\_LsgRNA173  
AAAGTCTCTACGCAAAGCACGGCCTGGGGT  
>CD45\_LsgRNA174  
ACTCTCTGAAATAAATGGAGATGCAGGGTC  
>CD45\_LsgRNA175  
ATCATCTGAAGACTCATCTGATTCAGGCTC  
>CD45\_LsgRNA176  
CACTTCTGACTACCAAATGTAAAAGGTTT  
>CD45\_LsgRNA177  
AGGGTCTTCAGGAACCCCATGGTCTGGCCA  
>CD45\_LsgRNA178  
ATGATGAAAAGCAGCTGATGGATGTGGAGC  
>CD45\_LsgRNA179  
TACATGACTGCACACCAAAGAAAAGGCTA  
>CD45\_LsgRNA180  
TTGATGACTTCTGGAGGATGATCTGGGAGC  
>CD45\_LsgRNA181  
CCCCTGAGCAGCAATCATCATTTCTGGTTT  
>CD45\_LsgRNA182  
TTGCTGATGAGGGCAGACTGTTCTGGCTG  
>CD45\_LsgRNA183  
GAATTGATGCCATGCTGGAAGGCCTGGAAG  
>CD45\_LsgRNA184  
TAGATGCTGGCGATGATGTCATAGAGGAAC  
>CD45\_LsgRNA185  
CCTCTGCTTCCAGGCCTTCCAGCATGGCAT  
>CD45\_LsgRNA186  
TTTGTGGCTCAAACCTTCTGGCCTTTGGATT  
>CD45\_LsgRNA187  
TCCATGGGGTTTAGATGCAGACTCAGGTTT  
>CD45\_LsgRNA188  
ACACTGGTACTGGTACACAGTTCTGGGCTC  
>CD45\_LsgRNA189  
ATGATGTAATCAGGACATCGTTTGTGGTCA  
>CD45\_LsgRNA190  
CATGTGTAATTTGTTTGGGCACGAAGGTTG  
>CD45\_LsgRNA191  
TGCTTGTGATACTTCATCCCTTCTGGGGAA  
>CD45\_LsgRNA192  
ACCTTGTGCAGCAATGTATTTCTGGGTTC  
>CD45\_LsgRNA193  
AGTCTGTGCTCAGTACTGGGGCGAAGGAAA  
>CD45\_LsgRNA194  
TGTTTGTTCCTTAGTGCTGGTGTGGGCG

>CD45\_LsgRNA195  
 GGTTTTAGGGCCATTAGTTTCATAAGGAGG  
 >CD45\_LsgRNA196  
 GGCTTTAGTGGGAATACAATCAGTTTGGAGA  
 >CD45\_LsgRNA197  
 ACATTTATACTATTGTCTGTCTGGCCGGGAG  
 >CD45\_LsgRNA198  
 TGTTTTATGCTATAAGAACAATTCAGGTAA  
 >CD45\_LsgRNA199  
 ACTATTCAACTGACTATGAGTTTCTGGTAA  
 >CD45\_LsgRNA200  
 GGTTTTCATTCATTGACCTTGTCCGGACC  
 >CD45\_LsgRNA201  
 AAGCTTCCAAGGCTTCCCCAGAAGGGATG  
 >CD45\_LsgRNA202  
 CAGCTTCCTAACCTGCAGTGGACGAGGATG  
 >CD45\_LsgRNA203  
 AGACTTCCTTCATACAGGAGTTGGAGGACA  
 >CD45\_LsgRNA204  
 TTCTTTGAATCTTCCCATTGACATAGGCAA  
 >CD45\_LsgRNA205  
 AAGGTTGTCCAAGTACATCTTTCAGGTAT  
 >CD45\_LsgRNA206  
 ATGCTTGTGATACTTCATCCCTTCTGGGGA  
 >CD45\_LsgRNA207  
 TACCTTGTGCAGCAATGTATTTCTGGGTT  
 >CD45\_LsgRNA208  
 AGATTTTATACAAAACAACAAGCAAGGCTA  
 >CD45\_LsgRNA209  
 CTCTTTTCACAATGGAGTGTACGAGGGAGA  
 >CD45\_LsgRNA210  
 TATGTTTCCAACAAAATGTCAGAATGGATT

(33)  $S_{16}^-$ : 49 low on-target activity sgRNAs targeting THY1

>THY1\_LsgRNA1  
 CAATAAAAGTATCAGTGTGTATAGAGGTGA  
 >THY1\_LsgRNA2  
 CACAAAAGTAGTCGCCCTCATCCTTGGTGG  
 >THY1\_LsgRNA3  
 AGAGAAGAGGAAGCACGTGCTCTCAGGCAC  
 >THY1\_LsgRNA4  
 ATCCACAGACAAGCTGGTCAAGTGTGGCGG  
 >THY1\_LsgRNA5  
 AAGCACGTGCTCTCAGGCACCCCTTGGGATA

>THY1\_LsgRNA6  
CGGTACGTGTGCTCGGGTATCCCAAGGGTG  
>THY1\_LsgRNA7  
CATCAGCGTCGCTCTCCTGCTCTCAGGTAC  
>THY1\_LsgRNA8  
GAGCAGGAGAGCGACGCTGATGGCTGGGTT  
>THY1\_LsgRNA9  
ATCCAGGATGTGTTCTGAACCAGCAGGCTT  
>THY1\_LsgRNA10  
GGCTAGGGTAAGGACCTTGATATAGGGCTG  
>THY1\_LsgRNA11  
ACTCATGCTGGATGGAGTTATCCTTGGTGT  
>THY1\_LsgRNA12  
TAGCCAACTTCACCACCAAGGATGAGGGCG  
>THY1\_LsgRNA13  
GGTTCACCAGGCAGGCTGTCAGGCTGGTCA  
>THY1\_LsgRNA14  
GAAGCACGTGCTCTCAGGCACCCTTGGGAT  
>THY1\_LsgRNA15  
AGAGCACGTGCTTCCTCTTCTCTCGGGTCA  
>THY1\_LsgRNA16  
AAGGCACTGCTGTGCCAGTCTTGCAGGTGT  
>THY1\_LsgRNA17  
GGGTCAGGCTGAACTCATGCTGGATGGAGT  
>THY1\_LsgRNA18  
ACTGCCGCCATGAGAATAACACCAAGGATA  
>THY1\_LsgRNA19  
CTGCCCTCGGGACACCTGCAAGACTGGCAC  
>THY1\_LsgRNA20  
TCATCCTTGGTGGTGAAGTTGGCTAGGGTA  
>THY1\_LsgRNA21  
GACGCGGGAGCGGTACGTGTGCTCGGGTAT  
>THY1\_LsgRNA22  
CGCCCTCATCCTTGGTGGTGAAGTTGGCTA  
>THY1\_LsgRNA23  
CCCTCTCCAACCAGCCCTATATCAAGGTCC  
>THY1\_LsgRNA24  
GACCCTTGCCCAGTACCTGAGAGCAGGAGA  
>THY1\_LsgRNA25  
AGGTGACCAGCCTGACAGCCTGCCTGGTGA  
>THY1\_LsgRNA26  
TAAGGACCTTGATATAGGGCTGGTTGGAGA  
>THY1\_LsgRNA27  
GAGCGACGCTGATGGCTGGGTTTCATGGTGC

>THY1\_LsgRNA28  
CTGAGAGCAGGAGAGCGACGCTGATGGCTG  
>THY1\_LsgRNA29  
GAGAGCACGTGCTTCCTCTTCTCTCGGGTC  
>THY1\_LsgRNA30  
TCTTGCAGGTGTCCCGAGGGCAGAAGGTGA  
>THY1\_LsgRNA31  
TGACGCGGGAGCGGTACGTGTGCTCGGGTA  
>THY1\_LsgRNA32  
TCAGGCTGGTCACCTTCTGCCCTCGGGACA  
>THY1\_LsgRNA33  
TAGGGCTGGTTGGAGAGGGTGACGCGGGAG  
>THY1\_LsgRNA34  
ACGTGCTTCCTCTTCTCTCGGGTCAGGCTG  
>THY1\_LsgRNA35  
AGCAGGAGAGCGACGCTGATGGCTGGGTTC  
>THY1\_LsgRNA36  
TGGCGGCAGTCCAGGCGAAGGTTTTGGTTC  
>THY1\_LsgRNA37  
GTCAGGCTGGTCACCTTCTGCCCTCGGGAC  
>THY1\_LsgRNA38  
GCCTGGTGAACCAAACCTTCGCCTGGACT  
>THY1\_LsgRNA39  
TTTTGGTTCACCAGGCAGGCTGTCAGGCTG  
>THY1\_LsgRNA40  
AAAAGTAGTCGCCCTCATCCTTGGTGGTGA  
>THY1\_LsgRNA41  
TCAAGTGTGGCGGCATAAGCCTGCTGGTTC  
>THY1\_LsgRNA42  
AGGGTAAGGACCTTGATATAGGGCTGGTTG  
>THY1\_LsgRNA43  
TGGCTAGGGTAAGGACCTTGATATAGGGCT  
>THY1\_LsgRNA44  
GAGTTATCCTTGGTGTTATTCTCATGGCGG  
>THY1\_LsgRNA45  
GTGTTATTCTCATGGCGGCAGTCCAGGCGA  
>THY1\_LsgRNA46  
GAGTTCAGCCTGACCCGAGAGAAGAGGAAG  
>THY1\_LsgRNA47  
ACCTTGATATAGGGCTGGTTGGAGAGGGTG  
>THY1\_LsgRNA48  
TGGTTGGAGAGGGTGACGCGGGAGCGGTAC  
>THY1\_LsgRNA49  
CCCCTTCTCTATCCACAGACAAGCTGGTCA

(34) S<sub>17</sub>: 110 low on-target activity sgRNAs targeting CD43

>CD43\_LsgRNA1  
ACAGAAACTGATGGGCTGGCATTCTGGGCT  
>CD43\_LsgRNA2  
CCCCAAAGAGGAGGAGAAGGTGCAAGGCCA  
>CD43\_LsgRNA3  
TGGAAACTACTGAATTGTCTTCTTTGGAGA  
>CD43\_LsgRNA4  
CAGAAACTGATGGGCTGGCATTCTGGGCTT  
>CD43\_LsgRNA5  
CTGGAAGCAGTGCTGATGTCTTGCTGGAAA  
>CD43\_LsgRNA6  
CTCGAAGGAGACCATCAGCCCCCTGGGGGCA  
>CD43\_LsgRNA7  
GACAACAAGCTCTAACGAGACCAGTGGACC  
>CD43\_LsgRNA8  
TGTCACAGGATTGGCTGCAGTGACAGGAGG  
>CD43\_LsgRNA9  
TACAACAGTAAGCTCCAAGACCAGTGGTCC  
>CD43\_LsgRNA10  
TGTCACCACAGCTACTGGGTCTCTGGGGCC  
>CD43\_LsgRNA11  
AACCACCACCAAGGCAATAAGCATGGGCAC  
>CD43\_LsgRNA12  
AGAGACCCAGTAGCTGTGGTGACAGGGGGA  
>CD43\_LsgRNA13  
CTGTACCTGAGCCTACTGCCTCTCAGGAAG  
>CD43\_LsgRNA14  
GGTGACCTGGTGGTTATGGGATCTTGGGTA  
>CD43\_LsgRNA15  
CCCACTGGAActCTCCACAGAACTGGTTG  
>CD43\_LsgRNA16  
AGGTACTTGGAGCTGTGATATGTGGGGTAG  
>CD43\_LsgRNA17  
GCCAAGAATCAAGTGGCATGTTACTGGTGC  
>CD43\_LsgRNA18  
CGTTAGAGCTTGTGTGCACAGTGGTGGGGG  
>CD43\_LsgRNA19  
CGCCAGAGGCAAAAGCGGAGGACTGGGGCC  
>CD43\_LsgRNA20  
TTAGAGCTTGTGTGCACAGTGGTGGGGGT  
>CD43\_LsgRNA21  
TCGAAGGAGACCATCAGCCCCCTGGGGGCAG



>CD43\_LsgRNA22  
TGAGAGGCAGTAGGCTCAGGTACAGGGGTG  
>CD43\_LsgRNA23  
GCTCAGGTACAGGGGTGCTCATGCTGGCAC  
>CD43\_LsgRNA24  
CTGCAGGTCCGTCTGTACAGGATTGGCTG  
>CD43\_LsgRNA25  
AGGGAGTCCATGCATCTCACTCGAGGGCCC  
>CD43\_LsgRNA26  
TAACATGCCACTTGATTCTTGGCTTGGTGA  
>CD43\_LsgRNA27  
CAGCATGCCCCAAAGAGGAGGAGAAGGTGC  
>CD43\_LsgRNA28  
GCCACAACAGCAGTAGCGCCACGAGGGCCA  
>CD43\_LsgRNA29  
TTGTCACAGTGGTGGGGGTGCACTGGTTC  
>CD43\_LsgRNA30  
CTGTCACCACAGCTACTGGGTCTCTGGGGC  
>CD43\_LsgRNA31  
AAACCACCACCAAGGCAATAAGCATGGGCA  
>CD43\_LsgRNA32  
GCGCCAGAGGCAAAAGCGGAGGACTGGGGC  
>CD43\_LsgRNA33  
AGCCCATCAGTTTCTGTGGGGTCAGGGACA  
>CD43\_LsgRNA34  
TGCCCATGCTTATTGCCTTGGTGGTGGTTT  
>CD43\_LsgRNA35  
GTTTCCAAGGGGGTCAAAGAAACTGGGATT  
>CD43\_LsgRNA36  
AGACCCAGTAGCTGTGGTGACAGGGGGACC  
>CD43\_LsgRNA37  
CAGCCCATCAGTTTCTGTGGGGTCAGGGAC  
>CD43\_LsgRNA38  
GAGACCCAGTAGCTGTGGTGACAGGGGGAC  
>CD43\_LsgRNA39  
CAATCCCAGTTTCTTTGACCCCTTGAAAA  
>CD43\_LsgRNA40  
CTGACCCACAGAACTGATGGGCTGGCAT  
>CD43\_LsgRNA41  
AGGGCCCCAGAGACCCAGTAGCTGTGGTGA  
>CD43\_LsgRNA42  
TGGTCCCCCTGTCACCACAGCTACTGGGTC  
>CD43\_LsgRNA43  
GGTCCCCCTGTCACCACAGCTACTGGGTCT

>CD43\_LsgRNA44  
TTCTCCTCCTCTTTGGGGCATGCTGGGTCC

>CD43\_LsgRNA45  
TGTCCCTGACCCACAGAACTGATGGGCT

>CD43\_LsgRNA46  
GTGACCTGGTGGTTATGGGATCTTGGGTAG

>CD43\_LsgRNA47  
GACTCGAAGGAGACCATCAGCCCCCTGGGGG

>CD43\_LsgRNA48  
CTAACGAGACCAGTGGACCCTCTGTGGCTA

>CD43\_LsgRNA49  
GTGGCGAGCCCAGACAGTCTGCAGAGGACG

>CD43\_LsgRNA50  
AACTCTCCACAGAACTGGTTGCTGTGGTAG

>CD43\_LsgRNA51  
GTCACTGGCTACATTTGATGGTTCTGGAAG

>CD43\_LsgRNA52  
TTGGCTTGGTGACCTGGTGGTTATGGGATC

>CD43\_LsgRNA53  
AGAGCTTGTGTGCACAGTGGTGGGGGGTGC

>CD43\_LsgRNA54  
TCCTCTTTGGGGCATGCTGGGTCCAGGTGG

>CD43\_LsgRNA55  
CACAGAACTGGTTGCTGTGGTAGCAGGGAG

>CD43\_LsgRNA56  
ACTCGAAGGAGACCATCAGCCCCCTGGGGGC

>CD43\_LsgRNA57  
TGGTGACAGGGGGACCACTGGTCTTGGAGC

>CD43\_LsgRNA58  
CAGAGACCCAGTAGCTGTGGTGACAGGGGG

>CD43\_LsgRNA59  
TGCAGACTGTCTGGGCTCGCCACCTGGACC

>CD43\_LsgRNA60  
TGTGGAGAGTTCCAGTGTGGCCCGTGGCAC

>CD43\_LsgRNA61  
GTTAGAGCTTGTGTGCACAGTGGTGGGGGG

>CD43\_LsgRNA62  
CTGAGAGGCAGTAGGCTCAGGTACAGGGGT

>CD43\_LsgRNA63  
CCACGAGGGCCAAAACCACCACCAAGGCAA

>CD43\_LsgRNA64  
CAGGGAGTCCATGCATCTCACTCGAGGGCC

>CD43\_LsgRNA65  
TGCAGCATCTACATCTATCTCTAAAGGAAC

>CD43\_LsgRNA66  
GAATGCCAGCCCATCAGTTTCTGTGGGGTC  
>CD43\_LsgRNA67  
TGGTGCCCATGCTTATTGCCTTGGTGGTGG  
>CD43\_LsgRNA68  
TTCTGCTGGAAACTGAGGTGCCACGGGGCCA  
>CD43\_LsgRNA69  
TGGAGCTTACTGTTGTAGCCACAGAGGGTC  
>CD43\_LsgRNA70  
CTTGGCTTGGTGACCTGGTGGTTATGGGAT  
>CD43\_LsgRNA71  
TAGAGCTTGTTCACAGTGGTGGGGGGTG  
>CD43\_LsgRNA72  
CACAGGATTGGCTGCAGTGACAGGAGGGTC  
>CD43\_LsgRNA73  
ACTGGGATTGTGGTCTGCCCCAGGGGCTG  
>CD43\_LsgRNA74  
GAGAGGCAGTAGGCTCAGGTACAGGGGTGC  
>CD43\_LsgRNA75  
TTGTGGCGCCAGAGGCAAAAGCGGAGGACT  
>CD43\_LsgRNA76  
TTATGGGATCTTGGGTAGACGTCGTGGATG  
>CD43\_LsgRNA77  
AACTGGGATTGTGGTCTGCCCCAGGGGCT  
>CD43\_LsgRNA78  
AGGAGGGTCACTGGCTACATTTGATGGTTC  
>CD43\_LsgRNA79  
AGGGGGTCAAAGAAACTGGGATTGTGGTCT  
>CD43\_LsgRNA80  
TACTGGTGCCCATGCTTATTGCCTTGGTGG  
>CD43\_LsgRNA81  
ACCAGTAACATGCCACTTGATTCTTGGCTT  
>CD43\_LsgRNA82  
TGGGGTCAGGGACAGTGGACTCGAAGGAGA  
>CD43\_LsgRNA83  
CATCGTCGTCCTCTGCAGACTGTCTGGGCT  
>CD43\_LsgRNA84  
TCTCGTTAGAGCTTGTGTGCACAGTGGTGG  
>CD43\_LsgRNA85  
CTGCTACCACAGCAACCAGTTCTGTGGAGA  
>CD43\_LsgRNA86  
GCGCTACTGCTGTTGTGGCGCCAGAGGCAA  
>CD43\_LsgRNA87  
GAGGTACTTGGAGCTGTGATATGTGGGGTA

>CD43\_LsgRNA88  
TGCTTATTGCCTTGGTGGTGGTTTTGGCCC  
>CD43\_LsgRNA89  
CAGGTCACCAAGCCAAGAATCAAGTGGCAT  
>CD43\_LsgRNA90  
AGTTTCCAAGGGGGTCAAAGAAACTGGGAT  
>CD43\_LsgRNA91  
CTTCTCCTCCTCTTTGGGGCATGCTGGGTC  
>CD43\_LsgRNA92  
AACTTCCTGAGAGGCAGTAGGCTCAGGTAC  
>CD43\_LsgRNA93  
ATCGTCGTCCTCTGCAGACTGTCTGGGCTC  
>CD43\_LsgRNA94  
GCCCTCGTGGCGCTACTGCTGTTGTGGCGC  
>CD43\_LsgRNA95  
TCCGTCTGTCACAGGATTGGCTGCAGGGAC  
>CD43\_LsgRNA96  
ATTGTCTTCTTTGGAGACTTCTGCTGGTGC  
>CD43\_LsgRNA97  
AAACTGAGGTGCCACGGGCCACACTGGAAC  
>CD43\_LsgRNA98  
CACTTGATTCTTTGGCTTGGTGACCTGGTGG  
>CD43\_LsgRNA99  
GCCTTGCACCTTCTCCTCCTCTTTGGGGCA  
>CD43\_LsgRNA100  
TGGCTGCAGTGACAGGAGGGTCACTGGCTA  
>CD43\_LsgRNA101  
AGAATGCCAGCCCATCAGTTTCTGTGGGGT  
>CD43\_LsgRNA102  
TTTCTGCTGGAACTGAGGTGCCACGGGCC  
>CD43\_LsgRNA103  
AAACTGGGATTGTGGTCTGCCCCAGGGGC  
>CD43\_LsgRNA104  
CTGTTGTAGCCACAGAGGGTCCACTGGTCT  
>CD43\_LsgRNA105  
CTGTTGTGGCGCCAGAGGCAAAAGCGGAGG  
>CD43\_LsgRNA106  
TAGCTGTGGTGACAGGGGGACCACTGGTCT  
>CD43\_LsgRNA107  
GGCATTCTGGGCTTCAGAGGTACTTGGAGC  
>CD43\_LsgRNA108  
CCAGTTCTGTGGAGAGTTCCAGTGTGGCCC  
>CD43\_LsgRNA109  
CAGTTTCTGTGGGGTCAGGGACAGTGGACT

>CD43\_LsgRNA110  
GGCCTTGCACCTTCTCCTCCTCTTTGGGGC
